# Supplementary material for: Alternative splicing of apoptosis genes promotes human T cell survival
Source: eLife. 2022 Oct 20;11:e80953. doi: 10.7554/eLife.80953 (PMC9625086; doi:10.7554/eLife.80953)
Supplement: Supplementary file 1. [file elife-80953-supp1.xlsx]

## Sheet: 8hr CD28
8hr CD28 DE
id	gene_name	baseMean	log2FoldChange	lfcSE	stat	pvalue	padj
ENSG00000000003	TSPAN6	120.126	-0.0219819	0.489225	-0.0449322	0.964161	1
ENSG00000000419	DPM1	2457.99	0.0712625	0.34167	0.208571	0.834783	1
ENSG00000000457	SCYL3	1489.52	0.139984	0.22281	0.628266	0.52983	1
ENSG00000000460	C1orf112	700.154	0.168625	0.744483	0.226499	0.820813	1
ENSG00000000938	FGR	157.443	0.30906	0.556214	0.555649	0.578451	1
ENSG00000000971	CFH	111.2	0.144522	0.371797	0.388711	0.69749	1
ENSG00000001036	FUCA2	493.646	-0.166736	0.40277	-0.413974	0.678893	1
ENSG00000001084	GCLC	1637.07	-0.0209446	0.289481	-0.072352	0.942322	1
ENSG00000001167	NFYA	2353.56	0.176683	0.295548	0.597816	0.549962	1
ENSG00000001460	STPG1	382.459	-0.24746	0.176079	-1.40539	0.159905	1
ENSG00000001461	NIPAL3	3041.64	0.0319492	0.208195	0.153458	0.878037	1
ENSG00000001497	LAS1L	3728.22	0.0261786	0.457323	0.0572431	0.954352	1
ENSG00000001561	ENPP4	858.987	0.0482312	0.522695	0.0922741	0.92648	1
ENSG00000001617	SEMA3F	5.30227	-2.7926	1.68897	-1.65344	0.0982424	1
ENSG00000001626	CFTR	24.8971	0.0335343	0.541026	0.0619828	0.950577	1
ENSG00000001629	ANKIB1	2161.2	0.0772802	0.426825	0.181058	0.856322	1
ENSG00000001630	CYP51A1	1520.52	0.128269	0.424045	0.30249	0.762279	1
ENSG00000001631	KRIT1	1853.27	-0.040177	0.479422	-0.0838029	0.933213	1
ENSG00000002016	RAD52	941.965	-0.0237362	0.439129	-0.0540528	0.956893	1
ENSG00000002079	MYH16	5.65082	-0.101962	0.924952	-0.110235	0.912223	1
ENSG00000002330	BAD	1059.74	0.0678699	0.43915	0.154548	0.877178	1
ENSG00000002549	LAP3	3762.94	-0.0191489	0.641497	-0.0298504	0.976186	1
ENSG00000002586	CD99	7216.37	-0.0670409	0.243151	-0.275717	0.782766	1
ENSG00000002587	HS3ST1	36.619	0.911883	0.899893	1.01332	0.310906	1
ENSG00000002726	AOC1	38.9027	0.0625989	0.759922	0.0823754	0.934348	1
ENSG00000002745	WNT16	7.43983	-0.359155	1.07099	-0.33535	0.737361	1
ENSG00000002746	HECW1	9.21977	-1.34683	1.45021	-0.928714	0.353037	1
ENSG00000002822	MAD1L1	3942.3	-0.177379	0.502556	-0.352953	0.724124	1
ENSG00000002834	LASP1	11677.4	-0.0312285	0.446075	-0.0700073	0.944188	1
ENSG00000002919	SNX11	1682.98	-0.0535724	0.332807	-0.160972	0.872116	1
ENSG00000002933	TMEM176A	52.2402	-0.0494738	0.636285	-0.0777541	0.938024	1
ENSG00000003056	M6PR	10355.3	-0.0343287	0.30024	-0.114337	0.90897	1
ENSG00000003096	KLHL13	76.8713	0.497607	0.656372	0.758117	0.448381	1
ENSG00000003137	CYP26B1	7.2921	-1.66093	1.16299	-1.42815	0.153248	1
ENSG00000003147	ICA1	112.285	-0.145709	0.490693	-0.296946	0.766508	1
ENSG00000003249	DBNDD1	78.2902	0.0462729	0.587579	0.0787519	0.93723	1
ENSG00000003393	ALS2	730.402	0.0483855	0.321049	0.15071	0.880204	1
ENSG00000003400	CASP10	3091.64	0.0806932	0.290244	0.278018	0.780998	1
ENSG00000003402	CFLAR	11818	0.193983	0.550175	0.352584	0.7244	1
ENSG00000003436	TFPI	383.192	0.0971591	0.434707	0.223505	0.823143	1
ENSG00000003509	NDUFAF7	923.745	0.0789606	0.291621	0.270765	0.786572	1
ENSG00000003756	RBM5	11400.7	-0.00866664	0.343152	-0.025256	0.979851	1
ENSG00000003987	MTMR7	85.5654	0.235776	0.530138	0.444745	0.656504	1
ENSG00000004059	ARF5	6526.55	-0.0693291	0.375597	-0.184584	0.853556	1
ENSG00000004139	SARM1	2027.12	0.055732	0.403807	0.138017	0.890227	1
ENSG00000004142	POLDIP2	5419.96	-0.0550677	0.526034	-0.104685	0.916626	1
ENSG00000004399	PLXND1	785.226	0.162067	0.399361	0.405815	0.684879	1
ENSG00000004455	AK2	7481.21	-0.0248539	0.53098	-0.0468075	0.962667	1
ENSG00000004468	CD38	2422.03	0.315701	0.838615	0.376456	0.706578	1
ENSG00000004478	FKBP4	9003.64	-0.114978	0.645538	-0.178112	0.858635	1
ENSG00000004487	KDM1A	4323.91	0.103087	0.249909	0.412499	0.679974	1
ENSG00000004534	RBM6	7033.01	0.0153607	0.288757	0.053196	0.957576	1
ENSG00000004660	CAMKK1	510.629	-0.113507	0.269771	-0.420751	0.673937	1
ENSG00000004700	RECQL	2871.48	0.0984144	0.728309	0.135127	0.892511	1
ENSG00000004766	VPS50	1092.46	0.122379	0.342803	0.356996	0.721095	1
ENSG00000004776	HSPB6	5.32166	1.60752	1.88814	0.851378	0.394559	1
ENSG00000004777	ARHGAP33	304.967	-0.451779	0.549	-0.822912	0.410558	1
ENSG00000004779	NDUFAB1	3606.07	-0.0531519	0.520821	-0.102054	0.918714	1
ENSG00000004799	PDK4	5.87136	-1.53634	1.00576	-1.52754	0.126626	1
ENSG00000004809	SLC22A16	79.0809	-0.229183	0.307456	-0.745417	0.45602	1
ENSG00000004838	ZMYND10	134.713	0.129043	0.378298	0.341116	0.733017	1
ENSG00000004846	ABCB5	9.20618	0.464887	1.03063	0.451069	0.65194	1
ENSG00000004848	ARX	24.149	-0.0918288	1.43368	-0.064051	0.94893	1
ENSG00000004864	SLC25A13	338.441	-0.0754584	0.498278	-0.151438	0.87963	1
ENSG00000004866	ST7	266.843	-0.080594	0.485437	-0.166024	0.868138	1
ENSG00000004897	CDC27	2383.01	0.0312102	0.419258	0.0744416	0.940659	1
ENSG00000004939	SLC4A1	16.4116	-0.374057	0.672342	-0.55635	0.577972	1
ENSG00000004948	CALCR	0.578198	3.07156	6.27005	0.489878	0.62422	1
ENSG00000004961	HCCS	1256.06	0.216969	0.413234	0.525052	0.599547	1
ENSG00000004975	DVL2	2981.75	0.0548459	0.217909	0.251691	0.80128	1
ENSG00000005001	PRSS22	6.51396	-0.834147	0.906556	-0.920127	0.357506	1
ENSG00000005007	UPF1	10530.7	-0.0612192	0.274226	-0.223243	0.823346	1
ENSG00000005020	SKAP2	475.3	0.0559939	0.428923	0.130545	0.896135	1
ENSG00000005022	SLC25A5	16921.6	-0.0372952	0.596043	-0.0625713	0.950108	1
ENSG00000005059	MCUB	7250.38	0.0831135	0.277198	0.299834	0.764304	1
ENSG00000005073	HOXA11	1.12032	-0.520235	2.34377	-0.221965	0.824341	1
ENSG00000005075	POLR2J	2847.41	-0.161432	0.381362	-0.423304	0.672074	1
ENSG00000005100	DHX33	1968.63	0.145235	0.470736	0.308527	0.757681	1
ENSG00000005102	MEOX1	351.277	0.131235	0.416667	0.314963	0.752789	1
ENSG00000005108	THSD7A	25.082	-0.425199	1.00878	-0.421498	0.673391	1
ENSG00000005156	LIG3	2439.08	-0.000410845	0.341956	-0.00120145	0.999041	1
ENSG00000005175	RPAP3	1717.86	0.103738	0.337963	0.30695	0.758881	1
ENSG00000005187	ACSM3	512.78	-0.0965648	0.361027	-0.267472	0.789106	1
ENSG00000005189	REXO5	203.229	-0.192857	0.686038	-0.281117	0.77862	1
ENSG00000005194	CIAPIN1	2650.09	-0.0849123	0.475935	-0.178412	0.8584	1
ENSG00000005206	SPPL2B	5254.03	0.130309	0.30762	0.423604	0.671855	1
ENSG00000005238	FAM214B	387.176	-0.00124241	0.308861	-0.00402254	0.99679	1
ENSG00000005243	COPZ2	42.4008	-0.543753	0.607727	-0.894732	0.37093	1
ENSG00000005249	PRKAR2B	80.7971	-0.525974	0.573068	-0.917822	0.358712	1
ENSG00000005302	MSL3	8707.14	-0.0991572	0.288941	-0.343175	0.731467	1
ENSG00000005339	CREBBP	6720.32	0.0238688	0.382984	0.0623232	0.950305	1
ENSG00000005379	TSPOAP1	417.115	0.114611	0.422514	0.271259	0.786192	1
ENSG00000005381	MPO	417.698	0.0521384	0.785611	0.0663666	0.947086	1
ENSG00000005421	PON1	2.87798	1.7078	1.61864	1.05508	0.29139	1
ENSG00000005436	GCFC2	1460.51	0.0688614	0.357149	0.192809	0.847109	1
ENSG00000005448	WDR54	1412.38	-0.183586	0.51077	-0.359429	0.719274	1
ENSG00000005469	CROT	579.577	0.0521575	0.324716	0.160625	0.872389	1
ENSG00000005471	ABCB4	12.0163	0.256058	0.992415	0.258015	0.796395	1
ENSG00000005483	KMT2E	7240.03	0.138635	0.409035	0.338931	0.734662	1
ENSG00000005486	RHBDD2	3226.5	-0.0829683	0.331969	-0.249928	0.802643	1
ENSG00000005513	SOX8	595.689	0.0586765	0.500579	0.117217	0.906688	1
ENSG00000005700	IBTK	2094.21	0.096823	0.462886	0.209172	0.834314	1
ENSG00000005801	ZNF195	1518.89	0.0855098	0.294678	0.29018	0.771678	1
ENSG00000005810	MYCBP2	5957.22	-0.0622813	0.415037	-0.150062	0.880716	1
ENSG00000005812	FBXL3	4905.76	0.08877	0.427665	0.207569	0.835565	1
ENSG00000005844	ITGAL	19987.7	0.0297713	0.412785	0.072123	0.942504	1
ENSG00000005882	PDK2	1229.99	-0.120151	0.371061	-0.323804	0.746087	1
ENSG00000005884	ITGA3	761.477	0.0494554	0.489026	0.10113	0.919447	1
ENSG00000005889	ZFX	2746.71	0.106687	0.49425	0.215857	0.829099	1
ENSG00000005893	LAMP2	2907.77	0.113779	0.243168	0.467904	0.639853	1
ENSG00000005961	ITGA2B	328.579	0.199912	0.689679	0.289863	0.771921	1
ENSG00000005981	ASB4	63.1255	-0.204817	0.405403	-0.505219	0.613405	1
ENSG00000006007	GDE1	1491.46	0.129553	0.317125	0.408525	0.682888	1
ENSG00000006015	REX1BD	5243.97	-0.0266767	0.398348	-0.0669682	0.946607	1
ENSG00000006016	CRLF1	169.647	0.0707933	0.374541	0.189014	0.850082	1
ENSG00000006025	OSBPL7	1009.2	0.207315	0.384815	0.538738	0.590068	1
ENSG00000006042	TMEM98	16.9191	-0.977066	0.731825	-1.33511	0.181841	1
ENSG00000006047	YBX2	7.29118	1.81084	1.34567	1.34567	0.178407	1
ENSG00000006062	MAP3K14	2668.86	0.0866404	0.248777	0.348266	0.727641	1
ENSG00000006071	ABCC8	9.86182	-0.765927	0.707128	-1.08315	0.278741	1
ENSG00000006116	CACNG3	3.15726	-1.52836	1.73584	-0.880473	0.378603	1
ENSG00000006118	TMEM132A	23.0319	-1.55874	0.691364	-2.25459	0.0241588	1
ENSG00000006125	AP2B1	10165.4	-0.0116207	0.357222	-0.0325308	0.974049	1
ENSG00000006128	TAC1	1.17318	0	6.34336	0	1	1
ENSG00000006194	ZNF263	3111.17	-0.0115954	0.253081	-0.045817	0.963456	1
ENSG00000006210	CX3CL1	11.8921	-0.516728	0.618008	-0.836118	0.403089	1
ENSG00000006282	SPATA20	363.415	-0.0511988	0.58147	-0.0880506	0.929836	1
ENSG00000006283	CACNA1G	6.35423	-1.50099	1.07021	-1.40252	0.160759	1
ENSG00000006327	TNFRSF12A	223.079	-0.135636	0.722784	-0.187658	0.851145	1
ENSG00000006377	DLX6	4.84864	-0.166867	0.860434	-0.193934	0.846228	1
ENSG00000006432	MAP3K9	410.926	0.0826214	0.328607	0.25143	0.801482	1
ENSG00000006451	RALA	3620.82	0.146557	0.253581	0.577949	0.563299	1
ENSG00000006453	BAIAP2L1	122.686	0.489229	0.630542	0.775887	0.437816	1
ENSG00000006459	KDM7A	5947.83	0.159821	0.725279	0.220358	0.825593	1
ENSG00000006468	ETV1	4.46583	-1.54193	1.25156	-1.23201	0.217945	1
ENSG00000006530	AGK	2768.7	0.0224582	0.278474	0.0806473	0.935722	1
ENSG00000006534	ALDH3B1	155.738	-0.0965805	0.616443	-0.156674	0.875502	1
ENSG00000006555	TTC22	693.881	-0.0242287	0.237287	-0.102107	0.918672	1
ENSG00000006576	PHTF2	1817.06	0.0484251	0.429747	0.112683	0.910282	1
ENSG00000006607	FARP2	794.538	0.177282	0.354604	0.499942	0.617116	1
ENSG00000006611	USH1C	1.19863	-1.73728	2.47107	-0.703048	0.482026	1
ENSG00000006625	GGCT	1571.29	0.0186547	0.482134	0.0386919	0.969136	1
ENSG00000006634	DBF4	1530.48	-0.120905	0.719526	-0.168034	0.866556	1
ENSG00000006638	TBXA2R	213.732	0.000633783	0.345575	0.00183399	0.998537	1
ENSG00000006652	IFRD1	2129.52	0.148771	0.34444	0.431922	0.665798	1
ENSG00000006659	LGALS14	66.6984	0.429387	0.983256	0.436699	0.662329	1
ENSG00000006695	COX10	1007.19	-0.0355096	0.438053	-0.0810624	0.935392	1
ENSG00000006704	GTF2IRD1	166.082	-0.178742	0.53685	-0.332946	0.739175	1
ENSG00000006712	PAF1	4191.85	-0.0999555	0.362925	-0.275416	0.782996	1
ENSG00000006715	VPS41	2006.86	0.407333	0.336661	1.20992	0.226309	1
ENSG00000006740	ARHGAP44	80.4458	0.0535324	0.341089	0.156945	0.875288	1
ENSG00000006744	ELAC2	5040.83	0.0281523	0.390164	0.0721551	0.942478	1
ENSG00000006747	SCIN	94.9728	-0.44162	0.482491	-0.915292	0.360038	1
ENSG00000006756	ARSD	226.942	0.105392	0.268639	0.392316	0.694825	1
ENSG00000006757	PNPLA4	546.845	-0.156983	0.4863	-0.322812	0.746837	1
ENSG00000006831	ADIPOR2	3113.43	0.000498762	0.251657	0.00198191	0.998419	1
ENSG00000006837	CDKL3	145.993	0.38304	0.42158	0.908582	0.363571	1
ENSG00000007001	UPP2	2.84856	0.417955	1.52393	0.274262	0.783883	1
ENSG00000007038	PRSS21	321.085	-0.140312	0.551878	-0.254245	0.799306	1
ENSG00000007047	MARK4	1203.86	-0.240827	0.282524	-0.852413	0.393985	1
ENSG00000007062	PROM1	71.5041	-0.609825	0.661599	-0.921743	0.356663	1
ENSG00000007080	CCDC124	4754.14	-0.0755384	0.612561	-0.123316	0.901857	1
ENSG00000007129	CEACAM21	1181.23	0.111984	0.219375	0.510469	0.609723	1
ENSG00000007168	PAFAH1B1	8074.22	0.0693524	0.186538	0.371786	0.710052	1
ENSG00000007171	NOS2	8.17282	1.01317	0.863625	1.17316	0.240732	1
ENSG00000007174	DNAH9	3.08945	-2.35019	1.71874	-1.3674	0.171501	1
ENSG00000007202	KIAA0100	8082.18	0.0669911	0.349473	0.191692	0.847984	1
ENSG00000007237	GAS7	149.598	0.443788	0.531749	0.834582	0.403953	1
ENSG00000007255	TRAPPC6A	1939.61	-0.0403558	0.389078	-0.103722	0.91739	1
ENSG00000007264	MATK	2409.27	-0.08239	0.760459	-0.108342	0.913724	1
ENSG00000007312	CD79B	863.358	-0.0843624	0.497913	-0.169432	0.865457	1
ENSG00000007314	SCN4A	7.82961	0.266715	1.08841	0.24505	0.806417	1
ENSG00000007341	ST7L	477.121	-0.020656	0.196255	-0.105251	0.916177	1
ENSG00000007350	TKTL1	90.7901	-0.605238	0.872764	-0.693473	0.488013	1
ENSG00000007372	PAX6	9.4614	0.370228	0.969742	0.38178	0.702625	1
ENSG00000007376	RPUSD1	2196.71	-0.0671251	0.503018	-0.133445	0.893842	1
ENSG00000007384	RHBDF1	10.3816	-0.863471	0.685622	-1.2594	0.207887	1
ENSG00000007392	LUC7L	5374.6	-0.00360331	0.309169	-0.0116548	0.990701	1
ENSG00000007402	CACNA2D2	295.091	0.0893799	0.515365	0.17343	0.862313	1
ENSG00000007516	BAIAP3	112.074	-0.449825	0.775073	-0.580365	0.561669	1
ENSG00000007520	TSR3	4888.5	-0.0590864	0.441667	-0.13378	0.893576	1
ENSG00000007541	PIGQ	1727.41	0.0949324	0.329162	0.288407	0.773036	1
ENSG00000007545	CRAMP1	2186.99	-0.0140273	0.264843	-0.0529644	0.95776	1
ENSG00000007866	TEAD3	61.6578	0.194983	0.970338	0.200943	0.840743	1
ENSG00000007908	SELE	2.13025	-2.56089	2.39006	-1.07148	0.283956	1
ENSG00000007923	DNAJC11	3308.98	0.0203699	0.428141	0.0475776	0.962053	1
ENSG00000007933	FMO3	26.3105	-0.338719	0.556404	-0.608765	0.54268	1
ENSG00000007944	MYLIP	1010.54	0.0113331	0.283464	0.0399809	0.968108	1
ENSG00000007952	NOX1	44.7355	-0.0495622	0.389109	-0.127374	0.898645	1
ENSG00000007968	E2F2	1139.62	0.00949077	0.891994	0.01064	0.991511	1
ENSG00000008018	PSMB1	8280.4	-0.029674	0.509705	-0.058218	0.953575	1
ENSG00000008056	SYN1	32.9123	1.24664	0.785958	1.58614	0.112707	1
ENSG00000008083	JARID2	2638.86	0.179613	0.267561	0.671298	0.502031	1
ENSG00000008086	CDKL5	335.027	-0.218679	0.393333	-0.555963	0.578236	1
ENSG00000008118	CAMK1G	4.52355	1.7804	2.16281	0.823185	0.410403	1
ENSG00000008128	CDK11A	4719.39	-0.0645364	0.243223	-0.265338	0.790749	1
ENSG00000008130	NADK	3399.31	0.05564	0.369512	0.150577	0.88031	1
ENSG00000008226	DLEC1	311.972	0.170246	0.65285	0.260774	0.794267	1
ENSG00000008256	CYTH3	637.586	-0.0652324	0.466483	-0.139839	0.888787	1
ENSG00000008277	ADAM22	154.798	-0.0273577	0.284484	-0.0961659	0.923389	1
ENSG00000008282	SYPL1	2964.55	-0.0179266	0.248586	-0.0721141	0.942511	1
ENSG00000008283	CYB561	858.831	0.0692216	0.391799	0.176676	0.859763	1
ENSG00000008294	SPAG9	2595.1	0.285899	0.355662	0.80385	0.421484	1
ENSG00000008300	CELSR3	677.2	0.0498952	0.458144	0.108907	0.913276	1
ENSG00000008311	AASS	80.9611	0.186435	0.494363	0.377122	0.706083	1
ENSG00000008323	PLEKHG6	16.1895	0.198033	0.657802	0.301052	0.763375	1
ENSG00000008324	SS18L2	1855.03	-0.0648882	0.319661	-0.202991	0.839142	1
ENSG00000008382	MPND	1157.75	0.0309316	0.461292	0.0670544	0.946538	1
ENSG00000008394	MGST1	81.5293	0.0265709	0.414927	0.0640376	0.94894	1
ENSG00000008405	CRY1	1901.74	0.00250735	0.326066	0.0076897	0.993865	1
ENSG00000008438	PGLYRP1	7.85382	0.64646	0.622309	1.03881	0.298893	1
ENSG00000008441	NFIX	719.319	0.145437	0.566432	0.25676	0.797364	1
ENSG00000008513	ST3GAL1	7335.66	0.031731	0.23547	0.134756	0.892805	1
ENSG00000008516	MMP25	934.564	-0.00673047	0.322945	-0.020841	0.983373	1
ENSG00000008517	IL32	45402.7	-0.0807478	0.631361	-0.127895	0.898232	1
ENSG00000008710	PKD1	4390.66	-0.0816924	0.232857	-0.350827	0.725718	1
ENSG00000008735	MAPK8IP2	43.2272	-0.1381	0.644837	-0.214163	0.83042	1
ENSG00000008838	MED24	3874.81	0.0220838	0.356196	0.0619991	0.950564	1
ENSG00000008853	RHOBTB2	424.839	-0.194743	0.53152	-0.366389	0.714075	1
ENSG00000008869	HEATR5B	2401.55	0.179355	0.373811	0.479802	0.631369	1
ENSG00000008952	SEC62	8880.49	-0.103233	0.424253	-0.243328	0.807751	1
ENSG00000008988	RPS20	110503	-0.0592291	0.31081	-0.190564	0.848867	1
ENSG00000009307	CSDE1	29200.7	0.0535127	0.287525	0.186115	0.852354	1
ENSG00000009335	UBE3C	4744.03	0.0625763	0.390145	0.160392	0.872572	1
ENSG00000009413	REV3L	828.558	0.0547425	0.34443	0.158937	0.873719	1
ENSG00000009694	TENM1	333.698	0.117221	0.903002	0.129812	0.896715	1
ENSG00000009724	MASP2	309.921	0.116936	0.694301	0.168423	0.866251	1
ENSG00000009765	IYD	47.9882	-0.289552	0.655584	-0.441671	0.658727	1
ENSG00000009780	FAM76A	884.269	-0.116861	0.386102	-0.302668	0.762143	1
ENSG00000009790	TRAF3IP3	14884.7	0.0446071	0.360907	0.123597	0.901634	1
ENSG00000009830	POMT2	523.047	0.0958739	0.506856	0.189154	0.849972	1
ENSG00000009844	VTA1	2378.06	-0.0239298	0.374606	-0.0638799	0.949066	1
ENSG00000009950	MLXIPL	17.862	-0.282557	0.530641	-0.532483	0.594391	1
ENSG00000009954	BAZ1B	7369.56	0.0467961	0.340729	0.137341	0.890761	1
ENSG00000010017	RANBP9	3546.43	-0.114766	0.287525	-0.399152	0.689781	1
ENSG00000010030	ETV7	1056.86	0.67808	0.841677	0.80563	0.420456	1
ENSG00000010072	SPRTN	612.047	0.0567864	0.351897	0.161372	0.8718	1
ENSG00000010165	METTL13	3478.78	-0.138364	0.418733	-0.330434	0.741072	1
ENSG00000010219	DYRK4	750.611	-0.0321085	0.251997	-0.127416	0.898611	1
ENSG00000010244	ZNF207	11982.6	-0.0804454	0.415821	-0.193462	0.846597	1
ENSG00000010256	UQCRC1	6260.22	-0.0660916	0.519356	-0.127257	0.898737	1
ENSG00000010270	STARD3NL	1140.76	0.134481	0.239572	0.561336	0.574568	1
ENSG00000010278	CD9	457.426	-0.0623857	0.551087	-0.113205	0.909868	1
ENSG00000010292	NCAPD2	6402.9	0.127319	0.588035	0.216515	0.828586	1
ENSG00000010295	IFFO1	2101.22	0.0220458	0.332541	0.066295	0.947143	1
ENSG00000010310	GIPR	153.313	-0.100528	0.335876	-0.299301	0.76471	1
ENSG00000010318	PHF7	357.2	0.228628	0.354191	0.645492	0.518608	1
ENSG00000010319	SEMA3G	15.2779	1.3547	0.667787	2.02864	0.0424954	1
ENSG00000010322	NISCH	7446.2	0.0693691	0.204404	0.339372	0.734329	1
ENSG00000010327	STAB1	95.5315	0.362949	0.681377	0.532671	0.594261	1
ENSG00000010361	FUZ	800.612	-0.0210004	0.37688	-0.0557217	0.955564	1
ENSG00000010379	SLC6A13	9.03571	-0.615203	0.798829	-0.770132	0.441222	1
ENSG00000010404	IDS	9592.39	0.157464	0.3446	0.456947	0.647709	1
ENSG00000010438	PRSS3	7.12914	2.42703	1.36013	1.78442	0.0743562	1
ENSG00000010539	ZNF200	1492.61	-0.0383438	0.207294	-0.184973	0.85325	1
ENSG00000010610	CD4	16412	-0.0600613	0.429332	-0.139895	0.888743	1
ENSG00000010626	LRRC23	300.991	-0.0148384	0.415099	-0.0357466	0.971484	1
ENSG00000010671	BTK	454.294	0.124744	0.523527	0.238277	0.811666	1
ENSG00000010704	HFE	119.97	0.0753311	0.589846	0.127713	0.898376	1
ENSG00000010803	SCMH1	977.637	0.0352553	0.291789	0.120825	0.90383	1
ENSG00000010810	FYN	17665.6	-0.0816638	0.186405	-0.438098	0.661315	1
ENSG00000010818	HIVEP2	6943.93	0.267986	0.340707	0.78656	0.43154	1
ENSG00000010932	FMO1	1.28039	0.0530859	2.73837	0.0193859	0.984533	1
ENSG00000011007	ELOA	3556.23	0.0492084	0.518172	0.0949653	0.924342	1
ENSG00000011009	LYPLA2	5263.46	-0.0288148	0.502712	-0.0573187	0.954291	1
ENSG00000011021	CLCN6	824.855	0.26033	0.300164	0.867293	0.385782	1
ENSG00000011028	MRC2	569.444	0.171077	0.612021	0.279528	0.77984	1
ENSG00000011052	NME1-NME2	1047.86	0.771948	0.888624	0.868701	0.385011	1
ENSG00000011105	TSPAN9	77.0279	0.15901	0.485346	0.327622	0.743197	1
ENSG00000011114	BTBD7	1412.56	-0.0300767	0.234672	-0.128165	0.898018	1
ENSG00000011132	APBA3	3077.13	0.143455	0.258081	0.555851	0.578313	1
ENSG00000011143	MKS1	912.473	0.0217792	0.214949	0.101323	0.919294	1
ENSG00000011198	ABHD5	683.81	0.162699	0.452233	0.359769	0.71902	1
ENSG00000011201	ANOS1	44.8853	0.397738	0.872567	0.455825	0.648516	1
ENSG00000011243	AKAP8L	4463.85	-0.0252072	0.334598	-0.0753358	0.939948	1
ENSG00000011258	MBTD1	1677.12	0.0462367	0.566852	0.0815674	0.934991	1
ENSG00000011260	UTP18	3274.79	0.0532403	0.2916	0.18258	0.855128	1
ENSG00000011275	RNF216	8075.17	0.136105	0.34387	0.395803	0.69225	1
ENSG00000011295	TTC19	2466.57	-0.0138746	0.150578	-0.0921421	0.926585	1
ENSG00000011304	PTBP1	29475.4	0.0175074	0.503466	0.0347737	0.97226	1
ENSG00000011332	DPF1	35.6935	-0.0558766	0.840792	-0.066457	0.947014	1
ENSG00000011347	SYT7	6.50059	1.87733	2.02187	0.928512	0.353142	1
ENSG00000011376	LARS2	1188	0.166608	0.461158	0.361282	0.717889	1
ENSG00000011405	PIK3C2A	1233.39	-0.0240434	0.384163	-0.0625865	0.950096	1
ENSG00000011422	PLAUR	255.458	0.0287827	0.334668	0.0860036	0.931464	1
ENSG00000011426	ANLN	437.259	-0.00972575	1.17661	-0.00826593	0.993405	1
ENSG00000011451	WIZ	2865.93	0.00359068	0.408004	0.00880061	0.992978	1
ENSG00000011454	RABGAP1	1801.65	0.0732685	0.356958	0.205258	0.837371	1
ENSG00000011465	DCN	10.1121	-0.5222	1.24873	-0.418184	0.675813	1
ENSG00000011478	QPCTL	817.975	-0.00636088	0.24093	-0.0264013	0.978937	1
ENSG00000011485	PPP5C	3877.78	-0.0251343	0.562455	-0.0446868	0.964357	1
ENSG00000011523	CEP68	1985.84	0.125897	0.560188	0.224741	0.822181	1
ENSG00000011566	MAP4K3	470.103	0.302161	0.241788	1.24969	0.211411	1
ENSG00000011590	ZBTB32	544.618	-0.382233	0.909477	-0.420277	0.674283	1
ENSG00000011600	TYROBP	336.186	-0.0580901	0.603263	-0.0962932	0.923288	1
ENSG00000011638	TMEM159	621.88	-0.10052	0.235709	-0.42646	0.669773	1
ENSG00000011677	GABRA3	2.36994	-3.81651	1.64055	-2.32636	0.0199994	1
ENSG00000012048	BRCA1	750.909	-0.291817	0.735581	-0.396716	0.691577	1
ENSG00000012061	ERCC1	3108.78	-0.186425	0.495665	-0.376111	0.706835	1
ENSG00000012124	CD22	98.6316	0.00556112	0.441718	0.0125897	0.989955	1
ENSG00000012171	SEMA3B	30.885	-0.0842103	0.675524	-0.124659	0.900793	1
ENSG00000012174	MBTPS2	447.58	0.160024	0.394144	0.406005	0.684739	1
ENSG00000012211	PRICKLE3	467.74	0.021779	0.363632	0.059893	0.952241	1
ENSG00000012223	LTF	21.803	0.453057	0.781672	0.579599	0.562185	1
ENSG00000012232	EXTL3	1293.11	-0.265557	0.362616	-0.732337	0.463963	1
ENSG00000012504	NR1H4	3.2748	-1.86357	1.16858	-1.59473	0.110774	1
ENSG00000012660	ELOVL5	5765.1	0.0314333	0.20477	0.153505	0.878	1
ENSG00000012779	ALOX5	535.542	0.168658	0.526624	0.320263	0.748769	1
ENSG00000012817	KDM5D	1975.33	-0.00829246	0.342328	-0.0242237	0.980674	1
ENSG00000012822	CALCOCO1	3016.96	0.0148727	0.495402	0.0300215	0.97605	1
ENSG00000012963	UBR7	2135.38	0.0899918	0.421127	0.213693	0.830787	1
ENSG00000012983	MAP4K5	1201.15	0.142812	0.395237	0.361332	0.717852	1
ENSG00000013016	EHD3	213.116	-0.204683	0.409268	-0.500119	0.616991	1
ENSG00000013275	PSMC4	5976.4	-0.0198459	0.509185	-0.0389759	0.96891	1
ENSG00000013288	MAN2B2	3409.29	0.10928	0.273431	0.39966	0.689407	1
ENSG00000013293	SLC7A14	41.5604	0.238758	0.406545	0.587287	0.557011	1
ENSG00000013297	CLDN11	30.534	-0.14814	0.441108	-0.335837	0.736994	1
ENSG00000013306	SLC25A39	8094.17	-0.0435647	0.490057	-0.0888972	0.929164	1
ENSG00000013364	MVP	10302.1	0.0523636	0.537701	0.0973843	0.922421	1
ENSG00000013374	NUB1	5470.83	-0.050557	0.156122	-0.32383	0.746067	1
ENSG00000013375	PGM3	963.576	0.273671	0.519675	0.526619	0.598458	1
ENSG00000013392	RWDD2A	398.619	-0.0501852	0.542019	-0.0925894	0.92623	1
ENSG00000013441	CLK1	17779	-0.0799802	0.755827	-0.105818	0.915727	1
ENSG00000013503	POLR3B	677.625	0.0168595	0.404332	0.0416971	0.96674	1
ENSG00000013523	ANGEL1	1691.77	0.0829801	0.238005	0.348649	0.727353	1
ENSG00000013561	RNF14	1574.26	0.183716	0.265039	0.693165	0.488206	1
ENSG00000013563	DNASE1L1	1003.49	-0.0398864	0.332375	-0.120004	0.90448	1
ENSG00000013573	DDX11	3203.14	-0.00716516	0.446816	-0.0160361	0.987206	1
ENSG00000013583	HEBP1	1139.26	-0.132824	0.299636	-0.443283	0.657561	1
ENSG00000013588	GPRC5A	119.18	-0.257561	0.426478	-0.603926	0.545893	1
ENSG00000013619	MAMLD1	120.863	0.4639	0.721921	0.642591	0.520489	1
ENSG00000013725	CD6	28299.6	-0.0225542	0.361814	-0.0623364	0.950295	1
ENSG00000013810	TACC3	11006.7	0.037704	0.349705	0.107817	0.914141	1
ENSG00000014123	UFL1	2460.46	0.131482	0.544196	0.241608	0.809084	1
ENSG00000014138	POLA2	2233.75	-0.176182	0.572789	-0.307585	0.758398	1
ENSG00000014164	ZC3H3	2058.32	0.0719363	0.362737	0.198315	0.842798	1
ENSG00000014216	CAPN1	5481.2	-0.0453023	0.419784	-0.107918	0.914061	1
ENSG00000014257	ACPP	24.216	0.979245	0.563997	1.73626	0.0825182	1
ENSG00000014641	MDH1	5430.75	-0.0420056	0.321705	-0.130572	0.896114	1
ENSG00000014824	SLC30A9	1980.54	0.021654	0.485894	0.0445653	0.964454	1
ENSG00000014914	MTMR11	36.9963	0.237938	0.698144	0.340815	0.733243	1
ENSG00000014919	COX15	1551.31	0.0714554	0.19312	0.370004	0.711379	1
ENSG00000015133	CCDC88C	6912.38	0.000157411	0.226972	0.000693529	0.999447	1
ENSG00000015153	YAF2	1435.67	0.110091	0.284227	0.387333	0.69851	1
ENSG00000015171	ZMYND11	3020.52	0.0391098	0.363822	0.107497	0.914395	1
ENSG00000015285	WAS	5656.59	-0.0291808	0.367432	-0.0794181	0.9367	1
ENSG00000015475	BID	1794.01	0.0256892	0.444062	0.0578504	0.953868	1
ENSG00000015479	MATR3	17319.6	0.0964239	0.530831	0.181647	0.85586	1
ENSG00000015520	NPC1L1	20.6567	-0.085941	1.02763	-0.0836304	0.93335	1
ENSG00000015532	XYLT2	2267.9	0.0418557	0.208252	0.200986	0.840709	1
ENSG00000015568	RGPD5	1024.87	0.160052	0.59883	0.267275	0.789258	1
ENSG00000015592	STMN4	11.4298	-0.952047	0.681931	-1.39611	0.162683	1
ENSG00000015676	NUDCD3	5029.01	-0.0221741	0.356315	-0.0622317	0.950378	1
ENSG00000016391	CHDH	112.831	0.224695	0.580747	0.386907	0.698825	1
ENSG00000016602	CLCA4	2.43887	-0.800972	2.05589	-0.389599	0.696833	1
ENSG00000016864	GLT8D1	1964.56	0.00495359	0.189792	0.0261	0.979178	1
ENSG00000017260	ATP2C1	2747.37	0.0454283	0.243779	0.186351	0.85217	1
ENSG00000017427	IGF1	2.26696	0	2.70909	0	1	1
ENSG00000017483	SLC38A5	3059.63	-0.0944839	0.815519	-0.115857	0.907766	1
ENSG00000017797	RALBP1	4472.93	0.0133513	0.180017	0.0741672	0.940877	1
ENSG00000018189	RUFY3	664.439	-0.0936855	0.300179	-0.312099	0.754965	1
ENSG00000018236	CNTN1	12.5938	-0.545754	1.19338	-0.457318	0.647442	1
ENSG00000018280	SLC11A1	89.8521	-0.127858	0.558387	-0.228977	0.818887	1
ENSG00000018408	WWTR1	60.7952	0.472335	0.48969	0.96456	0.334765	1
ENSG00000018510	AGPS	2463.18	0.290228	0.605547	0.479283	0.631737	1
ENSG00000018610	CXorf56	1536.13	0.143114	0.24639	0.580843	0.561346	1
ENSG00000018625	ATP1A2	3.82667	1.07926	1.15146	0.937297	0.348606	1
ENSG00000018699	TTC27	1688.96	-0.0607095	0.346048	-0.175437	0.860736	1
ENSG00000018869	ZNF582	219.681	0.0569599	0.412395	0.13812	0.890146	1
ENSG00000019102	VSIG2	27.2859	-0.231359	0.712909	-0.324528	0.745539	1
ENSG00000019144	PHLDB1	287.475	0.000546088	0.353137	0.00154639	0.998766	1
ENSG00000019169	MARCO	9.52736	1.22214	1.3533	0.903083	0.366482	1
ENSG00000019186	CYP24A1	15.1559	0.345269	0.758549	0.45517	0.648987	1
ENSG00000019485	PRDM11	391.474	0.242395	0.402173	0.602712	0.5467	1
ENSG00000019505	SYT13	5.74676	-0.329425	0.892374	-0.369155	0.712012	1
ENSG00000019582	CD74	25495.5	0.155393	0.603018	0.257692	0.796645	1
ENSG00000019991	HGF	53.4884	0.213459	0.730021	0.292402	0.76998	1
ENSG00000019995	ZRANB1	2082.17	0.0595465	0.333562	0.178517	0.858317	1
ENSG00000020129	NCDN	2016.74	0.0516843	0.480535	0.107556	0.914348	1
ENSG00000020181	ADGRA2	15.8152	-1.08712	0.59236	-1.83523	0.0664718	1
ENSG00000020219	CCT8L1P	1.07524	-1.13907	2.24372	-0.50767	0.611685	1
ENSG00000020256	ZFP64	723.163	-0.028705	0.186689	-0.153758	0.877801	1
ENSG00000020426	MNAT1	575.674	-0.0408439	0.469953	-0.0869107	0.930742	1
ENSG00000020577	SAMD4A	459.753	0.456413	0.461068	0.989903	0.322222	1
ENSG00000020633	RUNX3	18435.6	0.0996233	0.489196	0.203647	0.838629	1
ENSG00000020922	MRE11	2134.2	0.188379	0.585365	0.321814	0.747593	1
ENSG00000021300	PLEKHB1	2619.99	-0.0367428	0.46708	-0.0786649	0.937299	1
ENSG00000021355	SERPINB1	5895.76	0.0822075	0.474677	0.173186	0.862505	1
ENSG00000021461	CYP3A43	13.9097	-1.09091	0.828199	-1.31721	0.187768	1
ENSG00000021488	SLC7A9	35.2174	-0.558593	0.662536	-0.843113	0.399165	1
ENSG00000021574	SPAST	1214.08	0.0314708	0.453705	0.069364	0.9447	1
ENSG00000021645	NRXN3	15.1794	-1.59201	1.21199	-1.31356	0.188996	1
ENSG00000021762	OSBPL5	709	0.0933355	0.45126	0.206833	0.83614	1
ENSG00000021776	AQR	2938.04	-0.0558327	0.311144	-0.179443	0.85759	1
ENSG00000021826	CPS1	35.132	-0.801008	0.493429	-1.62335	0.104515	1
ENSG00000022267	FHL1	1180.43	-0.0596164	0.264291	-0.225571	0.821535	1
ENSG00000022277	RTF2	5130.34	-0.0972549	0.333335	-0.291763	0.770467	1
ENSG00000022355	GABRA1	2.77193	-0.233656	1.54477	-0.151256	0.879773	1
ENSG00000022556	NLRP2	668.392	-0.22204	0.427664	-0.519193	0.603626	1
ENSG00000022567	SLC45A4	1621.16	0.194132	0.318782	0.60898	0.542538	1
ENSG00000022840	RNF10	7675.04	-0.00307991	0.211264	-0.0145785	0.988368	1
ENSG00000022976	ZNF839	1437.74	-0.0822978	0.163709	-0.502708	0.615169	1
ENSG00000023041	ZDHHC6	2853.9	0.000927068	0.23186	0.0039984	0.99681	1
ENSG00000023171	GRAMD1B	781.261	0.0265403	0.522409	0.0508037	0.959482	1
ENSG00000023191	RNH1	9788.58	-0.00666553	0.397293	-0.0167774	0.986614	1
ENSG00000023228	NDUFS1	3848	-0.164378	0.376798	-0.43625	0.662655	1
ENSG00000023287	RB1CC1	1879.74	-0.0451039	0.6868	-0.0656725	0.947639	1
ENSG00000023318	ERP44	2428.36	-0.0040766	0.181171	-0.0225014	0.982048	1
ENSG00000023330	ALAS1	2076.53	-0.0133437	0.435013	-0.0306744	0.975529	1
ENSG00000023445	BIRC3	12861.7	0.534726	0.531772	1.00555	0.31463	1
ENSG00000023516	AKAP11	3308.92	0.139515	0.48517	0.28756	0.773684	1
ENSG00000023572	GLRX2	2005.79	0.113223	0.527916	0.214473	0.830178	1
ENSG00000023608	SNAPC1	724.632	0.00807696	0.454162	0.0177843	0.985811	1
ENSG00000023697	DERA	838.502	-0.131117	0.503392	-0.260466	0.794504	1
ENSG00000023734	STRAP	5336.52	0.0292405	0.421938	0.0693004	0.944751	1
ENSG00000023839	ABCC2	195.495	-0.238129	0.546519	-0.43572	0.66304	1
ENSG00000023892	DEF6	14853.9	-0.00519507	0.263745	-0.0196973	0.984285	1
ENSG00000023902	PLEKHO1	7831.05	-0.0642801	0.395084	-0.1627	0.870755	1
ENSG00000023909	GCLM	1609.59	-0.0168401	0.339938	-0.0495387	0.96049	1
ENSG00000024048	UBR2	3041.29	0.056708	0.334509	0.169526	0.865383	1
ENSG00000024422	EHD2	85.7381	-0.287373	0.658658	-0.4363	0.662619	1
ENSG00000024526	DEPDC1	97.4679	-0.167273	1.65108	-0.101311	0.919304	1
ENSG00000024862	CCDC28A	1341.85	-0.0901559	0.329593	-0.273537	0.78444	1
ENSG00000025039	RRAGD	769.312	0.00456111	0.41239	0.0110602	0.991175	1
ENSG00000025156	HSF2	1535.89	0.0979001	0.364315	0.268724	0.788142	1
ENSG00000025293	PHF20	3133.46	-0.0524222	0.175486	-0.298726	0.765149	1
ENSG00000025423	HSD17B6	53.9612	-0.666148	0.494952	-1.34588	0.17834	1
ENSG00000025434	NR1H3	408.612	-0.0170279	0.261356	-0.0651521	0.948053	1
ENSG00000025708	TYMP	10415.1	0.152472	0.89251	0.170835	0.864354	1
ENSG00000025770	NCAPH2	5795.97	-0.0144167	0.497364	-0.0289862	0.976876	1
ENSG00000025772	TOMM34	2222.4	0.0645774	0.660216	0.0978126	0.922081	1
ENSG00000025796	SEC63	3815.37	-0.0119232	0.325347	-0.0366478	0.970766	1
ENSG00000025800	KPNA6	5578.68	0.0770134	0.249006	0.309283	0.757106	1
ENSG00000026025	VIM	45189.3	-0.0894302	0.367069	-0.243633	0.807515	1
ENSG00000026036	RTEL1-TNFRSF6B	492.185	0.266169	0.426066	0.624713	0.532159	1
ENSG00000026103	FAS	1136.44	0.107594	0.544427	0.197627	0.843337	1
ENSG00000026297	RNASET2	9388.73	-0.0787174	0.358015	-0.219872	0.825971	1
ENSG00000026508	CD44	31954.6	0.119318	0.322464	0.370019	0.711368	1
ENSG00000026559	KCNG1	28.5517	-0.754307	0.562849	-1.34016	0.180194	1
ENSG00000026652	AGPAT4	206.101	0.405315	0.455958	0.888929	0.374041	1
ENSG00000026751	SLAMF7	703.417	0.294589	0.501295	0.587656	0.556763	1
ENSG00000026950	BTN3A1	8558.06	0.106684	0.606258	0.175971	0.860317	1
ENSG00000027001	MIPEP	540.039	-0.447849	0.369633	-1.21161	0.225664	1
ENSG00000027075	PRKCH	11701.3	-0.00666494	0.120594	-0.0552676	0.955925	1
ENSG00000027644	INSRR	3.67198	3.11113	1.83167	1.69852	0.0894092	1
ENSG00000027697	IFNGR1	1561.47	0.0684451	0.463737	0.147595	0.882663	1
ENSG00000027847	B4GALT7	1385.46	0.0147223	0.293232	0.0502069	0.959958	1
ENSG00000027869	SH2D2A	7151.22	0.0149333	0.777484	0.0192072	0.984676	1
ENSG00000028116	VRK2	687.653	0.1043	0.498299	0.209312	0.834205	1
ENSG00000028137	TNFRSF1B	12637.5	0.0454428	0.599367	0.075818	0.939564	1
ENSG00000028203	VEZT	1632.82	0.0822288	0.380624	0.216037	0.828959	1
ENSG00000028277	POU2F2	4729.89	0.179749	0.237363	0.757274	0.448886	1
ENSG00000028310	BRD9	3895.52	0.02577	0.19019	0.135496	0.89222	1
ENSG00000028528	SNX1	6649.13	0.0596112	0.244292	0.244017	0.807218	1
ENSG00000028839	TBPL1	1284.76	-0.113432	0.227509	-0.498582	0.618074	1
ENSG00000029153	ARNTL2	294.204	0.253942	0.844038	0.300866	0.763517	1
ENSG00000029363	BCLAF1	8445.16	0.00073451	0.505884	0.00145193	0.998842	1
ENSG00000029364	SLC39A9	2437.84	0.173874	0.226479	0.767727	0.442649	1
ENSG00000029534	ANK1	438.197	0.110438	0.42761	0.258268	0.7962	1
ENSG00000029639	TFB1M	702.637	0.0939768	0.274813	0.341966	0.732376	1
ENSG00000029725	RABEP1	3783.47	0.240329	0.326715	0.735593	0.461978	1
ENSG00000029993	HMGB3	558.135	-0.0168079	0.81538	-0.0206135	0.983554	1
ENSG00000030066	NUP160	4105.01	0.0647881	0.222385	0.291333	0.770796	1
ENSG00000030110	BAK1	3116.17	-0.0648301	0.544759	-0.119007	0.90527	1
ENSG00000030419	IKZF2	793.945	0.107103	0.386814	0.276886	0.781868	1
ENSG00000030582	GRN	2050.29	0.12978	0.408577	0.317639	0.750759	1
ENSG00000031003	FAM13B	2230.21	0.109539	0.430037	0.254719	0.79894	1
ENSG00000031081	ARHGAP31	841.334	-0.0580981	0.518452	-0.112061	0.910775	1
ENSG00000031691	CENPQ	424.412	0.0873102	0.61127	0.142834	0.886421	1
ENSG00000031698	SARS	10750.4	-0.0524946	0.335136	-0.156637	0.875531	1
ENSG00000031823	RANBP3	5449.17	-0.0366981	0.301087	-0.121886	0.90299	1
ENSG00000032219	ARID4A	2822.94	-0.0777054	0.731714	-0.106196	0.915427	1
ENSG00000032389	EIPR1	1594.8	-0.160157	0.483625	-0.331159	0.740524	1
ENSG00000032444	PNPLA6	5862.31	-0.0546127	0.318455	-0.171493	0.863836	1
ENSG00000032742	IFT88	431.218	-0.0363461	0.595667	-0.0610175	0.951345	1
ENSG00000033011	ALG1	1932.64	-0.0378119	0.513557	-0.0736274	0.941307	1
ENSG00000033030	ZCCHC8	2520.41	-0.00500718	0.28793	-0.0173903	0.986125	1
ENSG00000033050	ABCF2	4797.87	0.0704019	0.605779	0.116217	0.90748	1
ENSG00000033100	CHPF2	3022.6	0.0186782	0.285148	0.0655034	0.947773	1
ENSG00000033122	LRRC7	99.4506	0.019711	0.64078	0.0307609	0.97546	1
ENSG00000033170	FUT8	1821.77	-0.0951641	0.439158	-0.216697	0.828445	1
ENSG00000033178	UBA6	2571.25	0.0798608	0.635088	0.125748	0.899932	1
ENSG00000033327	GAB2	518.345	0.389814	0.286848	1.35896	0.174159	1
ENSG00000033627	ATP6V0A1	667.031	-0.130671	0.291026	-0.449001	0.653431	1
ENSG00000033800	PIAS1	3143.53	0.187904	0.212252	0.885283	0.376004	1
ENSG00000033867	SLC4A7	2663.03	0.100115	0.446082	0.224431	0.822422	1
ENSG00000034053	APBA2	4934.83	0.0347325	0.517223	0.0671518	0.946461	1
ENSG00000034152	MAP2K3	5897.87	0.00967219	0.583277	0.0165825	0.98677	1
ENSG00000034239	EFCAB1	8.63292	0.286825	0.738143	0.388577	0.697589	1
ENSG00000034510	TMSB10	74381.5	-0.12872	0.543625	-0.236781	0.812826	1
ENSG00000034533	ASTE1	982.137	-0.0638237	0.220371	-0.289619	0.772108	1
ENSG00000034677	RNF19A	4805.66	0.235649	0.562261	0.419109	0.675137	1
ENSG00000034693	PEX3	780.166	0.166335	0.316331	0.525825	0.599009	1
ENSG00000034713	GABARAPL2	3469.17	0.00273241	0.165507	0.0165093	0.986828	1
ENSG00000035115	SH3YL1	2697.88	-0.0927121	0.549734	-0.168649	0.866073	1
ENSG00000035141	FAM136A	3226.82	0.0665642	0.505965	0.131559	0.895333	1
ENSG00000035403	VCL	946.881	0.275999	0.333278	0.828133	0.407595	1
ENSG00000035499	DEPDC1B	229.033	0.39349	0.881628	0.446322	0.655364	1
ENSG00000035664	DAPK2	193.162	0.379129	0.319333	1.18725	0.235128	1
ENSG00000035681	NSMAF	3059.01	0.0632428	0.160219	0.394726	0.693045	1
ENSG00000035687	ADSS	3807.94	0.0596062	0.423095	0.140882	0.887963	1
ENSG00000035720	STAP1	373.935	-0.126448	0.410625	-0.307939	0.758129	1
ENSG00000035862	TIMP2	496.502	0.036341	0.399339	0.0910029	0.92749	1
ENSG00000035928	RFC1	3863.1	0.121292	0.422162	0.287312	0.773873	1
ENSG00000036054	TBC1D23	1563.63	-0.0786063	0.54111	-0.145269	0.884499	1
ENSG00000036257	CUL3	4322	-0.033726	0.334829	-0.100726	0.919768	1
ENSG00000036448	MYOM2	197.756	-0.297439	0.305625	-0.973215	0.330446	1
ENSG00000036530	CYP46A1	299.832	-0.248439	0.482623	-0.514767	0.606716	1
ENSG00000036549	AC118549.1	2355.72	0.0777413	0.448745	0.173242	0.862462	1
ENSG00000036565	SLC18A1	2.1397	-0.894868	1.8652	-0.479771	0.63139	1
ENSG00000036672	USP2	17.4825	-0.197127	0.860672	-0.229039	0.818839	1
ENSG00000036828	CASR	95.5851	0.185953	0.376642	0.493712	0.62151	1
ENSG00000037042	TUBG2	516.206	0.0111787	0.276858	0.0403771	0.967792	1
ENSG00000037241	RPL26L1	1286.87	-0.088397	0.548188	-0.161253	0.871894	1
ENSG00000037280	FLT4	309.644	0.22943	0.402949	0.569378	0.569099	1
ENSG00000037474	NSUN2	6552.42	-0.113964	0.29309	-0.388835	0.697398	1
ENSG00000037637	FBXO42	1883.14	0.0531565	0.16442	0.323297	0.746471	1
ENSG00000037749	MFAP3	519.843	0.297035	0.40043	0.74179	0.458215	1
ENSG00000037757	MRI1	2507.73	0.00322529	0.28354	0.0113751	0.990924	1
ENSG00000037897	METTL1	1144.78	0.0351558	0.674764	0.052101	0.958448	1
ENSG00000038002	AGA	1089.35	0.0356671	0.170628	0.209034	0.834422	1
ENSG00000038210	PI4K2B	1908.12	0.14195	0.574187	0.24722	0.804738	1
ENSG00000038219	BOD1L1	4392.22	0.109524	0.559924	0.195605	0.84492	1
ENSG00000038274	MAT2B	8984.97	0.0280637	0.22923	0.122426	0.902562	1
ENSG00000038295	TLL1	1.01711	-1.22762	2.73855	-0.448272	0.653957	1
ENSG00000038358	EDC4	6593.06	0.00568602	0.303961	0.0187064	0.985075	1
ENSG00000038382	TRIO	283.467	-0.146482	0.373129	-0.392578	0.694631	1
ENSG00000038427	VCAN	25.0766	-1.09992	0.739967	-1.48644	0.137163	1
ENSG00000038532	CLEC16A	2242.48	0.176217	0.375757	0.468964	0.639095	1
ENSG00000038945	MSR1	27.0719	0.0408602	0.406619	0.100488	0.919957	1
ENSG00000039068	CDH1	98.0883	0.0281438	0.466957	0.0602705	0.95194	1
ENSG00000039123	MTREX	3715.28	0.209185	0.501912	0.416777	0.676841	1
ENSG00000039139	DNAH5	2.94714	0.339121	1.33207	0.254582	0.799046	1
ENSG00000039319	ZFYVE16	807.897	0.248268	0.623024	0.398489	0.69027	1
ENSG00000039523	RIPOR1	1446.08	0.110341	0.296744	0.371838	0.710013	1
ENSG00000039560	RAI14	47.436	0.581889	0.542045	1.07351	0.283044	1
ENSG00000039600	SOX30	26.6033	-0.311787	0.730843	-0.426612	0.669662	1
ENSG00000039650	PNKP	2164.23	-0.0206123	0.348843	-0.0590876	0.952882	1
ENSG00000039987	BEST2	24.7455	0.0633631	0.584409	0.108423	0.913661	1
ENSG00000040199	PHLPP2	763.656	0.13417	0.391172	0.342995	0.731602	1
ENSG00000040275	SPDL1	849.809	0.29359	0.700414	0.419166	0.675095	1
ENSG00000040341	STAU2	1025.09	0.105307	0.294353	0.357759	0.720523	1
ENSG00000040487	PQLC2	348.033	-0.212588	0.382578	-0.555674	0.578434	1
ENSG00000040531	CTNS	995.345	-0.204076	0.391271	-0.521572	0.601969	1
ENSG00000040608	RTN4R	200.941	-0.375762	0.324864	-1.15667	0.247405	1
ENSG00000040633	PHF23	2561.21	-0.0993723	0.388746	-0.255623	0.798242	1
ENSG00000040731	CDH10	1.79059	-0.985809	1.85809	-0.530551	0.59573	1
ENSG00000040933	INPP4A	5104.97	0.145645	0.271055	0.537325	0.591043	1
ENSG00000041353	RAB27B	223.76	0.360232	0.623951	0.57734	0.56371	1
ENSG00000041357	PSMA4	7063.87	0.0287294	0.514045	0.0558888	0.95543	1
ENSG00000041515	MYO16	30.0007	0.929418	0.774509	1.20001	0.230136	1
ENSG00000041802	LSG1	3087.27	0.0184617	0.239551	0.0770682	0.938569	1
ENSG00000041880	PARP3	690.891	0.109097	0.408515	0.267058	0.789424	1
ENSG00000041982	TNC	21.4406	-0.0972386	0.563273	-0.172631	0.862941	1
ENSG00000041988	THAP3	1203.63	-0.0562565	0.302813	-0.185779	0.852618	1
ENSG00000042062	RIPOR3	216.63	0.0232482	0.433196	0.0536667	0.957201	1
ENSG00000042088	TDP1	2555.25	0.0157225	0.440084	0.0357262	0.971501	1
ENSG00000042286	AIFM2	563.601	-0.00635512	0.364755	-0.017423	0.986099	1
ENSG00000042304	C2orf83	12.4868	-0.173539	0.662065	-0.262118	0.793231	1
ENSG00000042317	SPATA7	115.283	-0.330454	0.502597	-0.657492	0.510865	1
ENSG00000042429	MED17	2551.55	0.0302199	0.239767	0.126039	0.899701	1
ENSG00000042445	RETSAT	1322.53	0.0739146	0.312157	0.236786	0.812823	1
ENSG00000042493	CAPG	1413.63	0.062004	0.370507	0.167349	0.867095	1
ENSG00000042753	AP2S1	2852.03	-0.216739	0.532396	-0.407102	0.683933	1
ENSG00000042781	USH2A	1.64688	-1.61703	1.94618	-0.830873	0.406046	1
ENSG00000042832	TG	46.1288	-0.874553	0.76563	-1.14227	0.253344	1
ENSG00000042980	ADAM28	149.871	0.126069	0.737665	0.170902	0.864301	1
ENSG00000043039	BARX2	16.1373	-0.597958	0.908131	-0.658449	0.51025	1
ENSG00000043093	DCUN1D1	1480.17	0.0258264	0.486945	0.0530375	0.957702	1
ENSG00000043143	JADE2	9109.32	0.105299	0.325238	0.323759	0.746121	1
ENSG00000043462	LCP2	16305.3	0.0492771	0.284386	0.173275	0.862435	1
ENSG00000043514	TRIT1	877.803	0.124949	0.240733	0.519037	0.603735	1
ENSG00000043591	ADRB1	9.40611	-0.00932831	0.638858	-0.0146015	0.98835	1
ENSG00000044090	CUL7	1271.02	0.0804085	0.283899	0.283229	0.777001	1
ENSG00000044115	CTNNA1	1446.48	-0.251427	0.536489	-0.468653	0.639317	1
ENSG00000044446	PHKA2	2075.08	0.058548	0.23702	0.247017	0.804895	1
ENSG00000044459	CNTLN	59.92	0.388158	0.468505	0.828503	0.407386	1
ENSG00000044574	HSPA5	29223.8	-0.0250713	0.379232	-0.0661107	0.94729	1
ENSG00000046604	DSG2	62.0534	0.104408	0.407319	0.25633	0.797696	1
ENSG00000046647	GEMIN8	652.283	-0.271061	0.34098	-0.794949	0.426643	1
ENSG00000046651	OFD1	3150.27	0.172013	0.615597	0.279426	0.779918	1
ENSG00000046653	GPM6B	136.02	-0.0328185	0.700791	-0.0468306	0.962648	1
ENSG00000046889	PREX2	14.6359	0.362301	0.705779	0.513335	0.607717	1
ENSG00000047056	WDR37	2814.21	0.0731619	0.270738	0.270231	0.786982	1
ENSG00000047188	YTHDC2	2584.53	0.18411	0.518592	0.355018	0.722576	1
ENSG00000047230	CTPS2	390.889	-0.136235	0.37907	-0.359392	0.719302	1
ENSG00000047249	ATP6V1H	1542.8	-0.059093	0.222833	-0.26519	0.790863	1
ENSG00000047315	POLR2B	6450.83	0.139484	0.287021	0.48597	0.626989	1
ENSG00000047346	FAM214A	2285.57	0.0114742	0.797534	0.0143871	0.988521	1
ENSG00000047365	ARAP2	2176.43	0.251175	0.607494	0.41346	0.67927	1
ENSG00000047410	TPR	4851.71	0.0685247	0.398297	0.172044	0.863403	1
ENSG00000047457	CP	14.3771	-1.16013	0.81319	-1.42664	0.153684	1
ENSG00000047578	KIAA0556	663.99	-0.0297728	0.259711	-0.114638	0.908732	1
ENSG00000047579	DTNBP1	1403.45	0.0725564	0.300997	0.241053	0.809514	1
ENSG00000047597	XK	20.3634	0.0458202	0.877537	0.0522146	0.958358	1
ENSG00000047617	ANO2	2.26275	-1.48798	2.23844	-0.66474	0.506217	1
ENSG00000047621	C12orf4	990.476	0.163725	0.565715	0.289412	0.772266	1
ENSG00000047634	SCML1	2776.57	0.0477456	0.587847	0.0812211	0.935266	1
ENSG00000047644	WWC3	2313.23	0.104567	0.212344	0.492441	0.622408	1
ENSG00000047648	ARHGAP6	26.9661	-0.112051	0.630171	-0.17781	0.858872	1
ENSG00000047662	FAM184B	123.743	-0.0511304	0.473972	-0.107876	0.914094	1
ENSG00000047849	MAP4	4991.17	0.129558	0.452906	0.28606	0.774832	1
ENSG00000047932	GOPC	3089.31	0.144775	0.487003	0.297276	0.766256	1
ENSG00000048028	USP28	697.787	0.161614	0.418981	0.385731	0.699696	1
ENSG00000048052	HDAC9	84.6803	-0.431912	0.502412	-0.859676	0.389967	1
ENSG00000048140	TSPAN17	3670.63	-0.0703086	0.638694	-0.110082	0.912344	1
ENSG00000048162	NOP16	3282.18	0.0111394	0.705002	0.0158005	0.987394	1
ENSG00000048342	CC2D2A	41.4663	-0.187403	0.650214	-0.288217	0.773181	1
ENSG00000048392	RRM2B	1190.01	0.165361	0.558868	0.295885	0.767318	1
ENSG00000048405	ZNF800	2464.95	0.0394025	0.410172	0.0960634	0.92347	1
ENSG00000048462	TNFRSF17	44.0578	-0.661995	0.797307	-0.830289	0.406375	1
ENSG00000048471	SNX29	1744.98	0.0127891	0.309747	0.041289	0.967066	1
ENSG00000048540	LMO3	2.54783	0.191704	1.48484	0.129107	0.897273	1
ENSG00000048544	MRPS10	2115.64	-0.0303577	0.309914	-0.0979553	0.921968	1
ENSG00000048649	RSF1	4015.16	-0.0697833	0.333151	-0.209464	0.834086	1
ENSG00000048707	VPS13D	3350.62	0.0885821	0.293311	0.302007	0.762647	1
ENSG00000048740	CELF2	12246.6	0.124656	0.206989	0.602235	0.547018	1
ENSG00000048828	FAM120A	8895.15	0.117259	0.349886	0.335134	0.737524	1
ENSG00000048991	R3HDM1	1785.57	-0.167367	0.347798	-0.481218	0.630362	1
ENSG00000049089	COL9A2	192.345	0.37471	0.607866	0.616435	0.537607	1
ENSG00000049130	KITLG	2.32066	-1.14428	2.02694	-0.564536	0.57239	1
ENSG00000049167	ERCC8	340.275	-0.0345426	0.352535	-0.0979835	0.921945	1
ENSG00000049192	ADAMTS6	132.237	0.8652	0.606191	1.42727	0.153502	1
ENSG00000049239	H6PD	3022.92	0.0118917	0.223995	0.053089	0.957661	1
ENSG00000049245	VAMP3	1769.49	0.14866	0.126376	1.17633	0.239463	1
ENSG00000049246	PER3	530.414	0.266609	0.228308	1.16776	0.242903	1
ENSG00000049247	UTS2	79.3405	-0.654804	0.821667	-0.796921	0.425497	1
ENSG00000049249	TNFRSF9	1723.52	0.327263	0.964111	0.339445	0.734274	1
ENSG00000049283	EPN3	5.35922	-0.566203	1.31405	-0.430885	0.666552	1
ENSG00000049323	LTBP1	33.667	0.670599	0.693689	0.966714	0.333687	1
ENSG00000049449	RCN1	1565.41	0.106542	0.533395	0.199744	0.841681	1
ENSG00000049540	ELN	60.1644	0.634366	0.433206	1.46435	0.143098	1
ENSG00000049541	RFC2	2092.43	0.118167	0.609087	0.194006	0.846171	1
ENSG00000049618	ARID1B	4704.51	-0.0586753	0.160889	-0.364694	0.71534	1
ENSG00000049656	CLPTM1L	6145.97	0.0133068	0.314415	0.0423226	0.966242	1
ENSG00000049759	NEDD4L	221.543	0.285004	0.489281	0.582496	0.560233	1
ENSG00000049768	FOXP3	4052.26	0.0612144	0.695005	0.0880776	0.929815	1
ENSG00000049769	PPP1R3F	1028.3	-0.189656	0.441979	-0.429106	0.667846	1
ENSG00000049860	HEXB	2255.41	-0.167233	0.188262	-0.888302	0.374378	1
ENSG00000049883	PTCD2	701.418	-0.0590228	0.417401	-0.141406	0.887549	1
ENSG00000050030	NEXMIF	67.2873	0.354077	0.681599	0.51948	0.603426	1
ENSG00000050130	JKAMP	1261.73	-0.0585485	0.460388	-0.127172	0.898804	1
ENSG00000050165	DKK3	16.2887	-0.267868	1.11382	-0.240496	0.809946	1
ENSG00000050327	ARHGEF5	395.091	0.0645228	0.482851	0.133629	0.893696	1
ENSG00000050344	NFE2L3	1449.02	0.379876	0.521448	0.728501	0.466307	1
ENSG00000050393	MCUR1	1794.34	0.0179696	0.488357	0.0367961	0.970648	1
ENSG00000050405	LIMA1	981.264	-0.0608433	0.412773	-0.147401	0.882815	1
ENSG00000050426	LETMD1	4071.08	-0.0312517	0.250949	-0.124534	0.900893	1
ENSG00000050438	SLC4A8	187.012	-0.160814	0.401176	-0.400856	0.688526	1
ENSG00000050555	LAMC3	155.785	0.0195483	0.565743	0.0345534	0.972436	1
ENSG00000050628	PTGER3	141.249	0.440466	0.913208	0.482329	0.629572	1
ENSG00000050730	TNIP3	614.549	0.404777	1.18804	0.340709	0.733322	1
ENSG00000050748	MAPK9	2301.03	0.122324	0.322781	0.378969	0.704711	1
ENSG00000050767	COL23A1	8.0784	-0.641464	0.780481	-0.821883	0.411144	1
ENSG00000050820	BCAR1	15.405	-0.596215	0.984768	-0.605437	0.544889	1
ENSG00000051009	FAM160A2	2062.3	-0.0474493	0.317679	-0.149362	0.881268	1
ENSG00000051108	HERPUD1	5274.4	-0.00280109	0.307206	-0.00911796	0.992725	1
ENSG00000051128	HOMER3	43.4347	-0.0452044	0.424133	-0.106581	0.915122	1
ENSG00000051180	RAD51	1149.16	1.2129	1.14638	1.05802	0.290047	1
ENSG00000051341	POLQ	243.697	0.310252	0.929947	0.333623	0.738664	1
ENSG00000051382	PIK3CB	1607.08	0.0160117	0.320906	0.0498953	0.960206	1
ENSG00000051523	CYBA	14669.5	-0.124221	0.465444	-0.266886	0.789557	1
ENSG00000051596	THOC3	2774.17	0.0790116	0.42979	0.183838	0.854141	1
ENSG00000051620	HEBP2	2259.08	-0.0705715	0.226738	-0.311247	0.755613	1
ENSG00000051825	MPHOSPH9	1821.15	0.187344	0.445707	0.420331	0.674244	1
ENSG00000052126	PLEKHA5	267.435	0.0175086	0.353109	0.0495843	0.960454	1
ENSG00000052344	PRSS8	30.3547	-0.30411	0.501102	-0.606883	0.543929	1
ENSG00000052723	SIKE1	2930.47	0.0955324	0.22693	0.420977	0.673772	1
ENSG00000052749	RRP12	3477.01	0.0972046	0.623345	0.15594	0.87608	1
ENSG00000052795	FNIP2	736.491	0.292222	0.37279	0.783878	0.433112	1
ENSG00000052802	MSMO1	1602.85	-0.0357145	0.389345	-0.0917295	0.926913	1
ENSG00000052841	TTC17	2943.47	0.154717	0.393144	0.393538	0.693922	1
ENSG00000052850	ALX4	2.05751	-0.496058	1.48416	-0.334234	0.738203	1
ENSG00000053108	FSTL4	12.104	-1.041	0.90628	-1.14865	0.250701	1
ENSG00000053254	FOXN3	5397.96	0.274778	0.268099	1.02491	0.305406	1
ENSG00000053328	METTL24	1.64255	0.632382	2.11261	0.299337	0.764683	1
ENSG00000053371	AKR7A2	2313.32	-0.130162	0.43061	-0.302273	0.762444	1
ENSG00000053372	MRTO4	5277.94	-0.109587	0.684354	-0.160132	0.872777	1
ENSG00000053438	NNAT	58.4347	-0.224019	0.497956	-0.449878	0.652799	1
ENSG00000053501	USE1	2328.74	-0.142984	0.413049	-0.346167	0.729217	1
ENSG00000053524	MCF2L2	173.048	0.344608	0.343586	1.00298	0.315872	1
ENSG00000053702	NRIP2	333.481	-0.0144995	0.382202	-0.0379366	0.969738	1
ENSG00000053747	LAMA3	5.75108	0.658215	1.05358	0.624743	0.53214	1
ENSG00000053770	AP5M1	2157.9	0.239127	0.423376	0.56481	0.572203	1
ENSG00000053900	ANAPC4	2109.23	0.0540204	0.34803	0.155218	0.87665	1
ENSG00000053918	KCNQ1	1435.29	-0.0689712	0.415309	-0.166072	0.8681	1
ENSG00000054116	TRAPPC3	2934.97	-0.0466603	0.24646	-0.189321	0.849841	1
ENSG00000054118	THRAP3	9489.94	0.0681932	0.333238	0.204638	0.837855	1
ENSG00000054148	PHPT1	2165.61	-0.116532	0.584551	-0.199354	0.841986	1
ENSG00000054179	ENTPD2	11.9376	0.902143	1.6472	0.547683	0.58391	1
ENSG00000054219	LY75	3028.53	0.128765	0.23518	0.547516	0.584024	1
ENSG00000054267	ARID4B	6195.37	0.0524576	0.501666	0.104567	0.91672	1
ENSG00000054277	OPN3	721.284	-0.0826894	0.348063	-0.23757	0.812214	1
ENSG00000054282	SDCCAG8	813.092	-0.142951	0.362545	-0.394299	0.69336	1
ENSG00000054356	PTPRN	11.4349	-1.55132	1.39914	-1.10877	0.267531	1
ENSG00000054392	HHAT	96.9261	0.0306753	0.306701	0.100017	0.920331	1
ENSG00000054523	KIF1B	940.577	-0.17913	0.297544	-0.602029	0.547155	1
ENSG00000054598	FOXC1	7.42238	-0.13582	0.935525	-0.14518	0.884569	1
ENSG00000054611	TBC1D22A	3099.24	0.00437783	0.316747	0.0138212	0.988973	1
ENSG00000054654	SYNE2	3899.75	-0.0114655	0.494839	-0.0231702	0.981515	1
ENSG00000054690	PLEKHH1	42.5442	0.0685415	0.644917	0.10628	0.91536	1
ENSG00000054793	ATP9A	62.3067	0.196544	0.576838	0.340726	0.73331	1
ENSG00000054965	FAM168A	1903.76	0.148206	0.306047	0.48426	0.628201	1
ENSG00000054967	RELT	1421.9	0.0187607	0.572606	0.0327637	0.973863	1
ENSG00000054983	GALC	1047.25	0.33449	0.190918	1.75201	0.0797721	1
ENSG00000055044	NOP58	7755.83	0.165016	0.538987	0.306159	0.759483	1
ENSG00000055070	SZRD1	11368.2	0.0190983	0.551518	0.0346286	0.972376	1
ENSG00000055118	KCNH2	192.684	0.0286065	0.571203	0.0500812	0.960058	1
ENSG00000055130	CUL1	4839.72	0.0368955	0.252432	0.14616	0.883795	1
ENSG00000055147	FAM114A2	1078.42	0.237737	0.36275	0.655374	0.512227	1
ENSG00000055163	CYFIP2	17166.7	-0.00790256	0.341906	-0.0231132	0.98156	1
ENSG00000055208	TAB2	8203.97	0.08731	0.342158	0.255175	0.798588	1
ENSG00000055211	GINM1	1102.13	0.107031	0.218392	0.490087	0.624072	1
ENSG00000055332	EIF2AK2	3066.3	0.0757277	0.598201	0.126592	0.899263	1
ENSG00000055483	USP36	6155.49	0.0390507	0.242988	0.16071	0.872322	1
ENSG00000055609	KMT2C	4168.4	0.124974	0.422181	0.296021	0.767214	1
ENSG00000055732	MCOLN3	104.411	-0.0236916	0.561182	-0.0422173	0.966325	1
ENSG00000055917	PUM2	9827.4	0.0738435	0.405675	0.182026	0.855562	1
ENSG00000055950	MRPL43	2779.65	0.0376006	0.27167	0.138405	0.88992	1
ENSG00000055955	ITIH4	449.093	0.114197	0.561648	0.203325	0.838881	1
ENSG00000055957	ITIH1	9.40682	0.0165823	0.748295	0.0221601	0.98232	1
ENSG00000056050	HPF1	759.837	0.153673	0.373367	0.411586	0.680643	1
ENSG00000056097	ZFR	4816	-0.0378725	0.326048	-0.116156	0.907529	1
ENSG00000056277	ZNF280C	248.825	0.0687085	0.500732	0.137216	0.89086	1
ENSG00000056291	NPFFR2	1.14968	-0.135634	2.39448	-0.0566444	0.954828	1
ENSG00000056558	TRAF1	15178.3	0.0816114	0.571153	0.142889	0.886378	1
ENSG00000056586	RC3H2	3038.72	0.11706	0.269651	0.434119	0.664202	1
ENSG00000056736	IL17RB	207.546	-0.137124	0.227173	-0.60361	0.546103	1
ENSG00000056972	TRAF3IP2	893.051	-0.0283058	0.256614	-0.110305	0.912167	1
ENSG00000056998	GYG2	5.58502	-0.671184	0.848069	-0.791427	0.428695	1
ENSG00000057019	DCBLD2	216.737	0.158951	0.369591	0.430072	0.667143	1
ENSG00000057252	SOAT1	3722.75	0.147029	0.365975	0.401745	0.687872	1
ENSG00000057294	PKP2	71.3193	-0.498263	0.331952	-1.50101	0.133353	1
ENSG00000057468	MSH4	12.332	0.256549	0.78344	0.327465	0.743316	1
ENSG00000057593	F7	4.24715	0.440217	1.30206	0.338092	0.735294	1
ENSG00000057608	GDI2	14136.8	0.0328664	0.308383	0.106577	0.915125	1
ENSG00000057657	PRDM1	1455.79	0.203563	0.711377	0.286153	0.774761	1
ENSG00000057663	ATG5	1846.5	0.0200085	0.452722	0.0441961	0.964748	1
ENSG00000057704	TMCC3	72.7676	0.0754104	0.604582	0.124731	0.900736	1
ENSG00000057757	PITHD1	4498.91	-0.0352608	0.217047	-0.162457	0.870946	1
ENSG00000057935	MTA3	1615.55	-0.0460242	0.243791	-0.188786	0.850261	1
ENSG00000058056	USP13	546.031	-0.0223065	0.455514	-0.04897	0.960943	1
ENSG00000058063	ATP11B	4485.91	0.0324413	0.440015	0.0737278	0.941227	1
ENSG00000058085	LAMC2	7.08896	-1.7533	0.867338	-2.02147	0.0432312	1
ENSG00000058091	CDK14	46.0106	0.105562	0.491809	0.21464	0.830048	1
ENSG00000058262	SEC61A1	13414.8	0.00660965	0.296956	0.022258	0.982242	1
ENSG00000058272	PPP1R12A	4865.61	-0.0294808	0.501719	-0.0587596	0.953144	1
ENSG00000058335	RASGRF1	20.9546	0.0957519	0.602386	0.158954	0.873705	1
ENSG00000058404	CAMK2B	41.6999	0.257224	0.97857	0.262857	0.792661	1
ENSG00000058453	CROCC	3247.2	-0.00276259	0.298335	-0.00926003	0.992612	1
ENSG00000058600	POLR3E	4539.07	0.0564963	0.29844	0.189305	0.849854	1
ENSG00000058668	ATP2B4	3092.09	0.0109855	0.344353	0.0319018	0.97455	1
ENSG00000058673	ZC3H11A	8868.52	0.0133023	0.41844	0.0317903	0.974639	1
ENSG00000058729	RIOK2	1541.12	0.203478	0.443223	0.459087	0.646172	1
ENSG00000058799	YIPF1	946.862	0.043728	0.303596	0.144034	0.885474	1
ENSG00000058804	NDC1	2120.99	0.102287	0.475986	0.214894	0.82985	1
ENSG00000058866	DGKG	15.7061	0.0761609	0.88987	0.0855865	0.931795	1
ENSG00000059122	FLYWCH1	4505.79	0.0358368	0.331193	0.108205	0.913833	1
ENSG00000059145	UNKL	2435.62	-0.0833502	0.297983	-0.279714	0.779697	1
ENSG00000059377	TBXAS1	293.97	0.132088	0.300684	0.439292	0.66045	1
ENSG00000059378	PARP12	3693.36	0.229104	0.238756	0.959571	0.337271	1
ENSG00000059573	ALDH18A1	4189.02	-0.0130611	0.578886	-0.0225625	0.981999	1
ENSG00000059588	TARBP1	3180.44	0.174125	0.330421	0.52698	0.598208	1
ENSG00000059691	GATB	854.019	0.277851	0.3962	0.701289	0.483123	1
ENSG00000059728	MXD1	1124.01	0.0150705	0.431642	0.0349144	0.972148	1
ENSG00000059758	CDK17	3575.25	0.10446	0.327324	0.319132	0.749626	1
ENSG00000059769	DNAJC25	412.803	0.0582695	0.421343	0.138295	0.890007	1
ENSG00000059804	SLC2A3	6719.61	0.0662919	0.316172	0.209671	0.833925	1
ENSG00000059915	PSD	1177.33	0.109542	0.389319	0.281367	0.778429	1
ENSG00000060069	CTDP1	3326.54	-0.0489801	0.270312	-0.181199	0.856212	1
ENSG00000060138	YBX3	2665.25	0.124066	0.677273	0.183184	0.854653	1
ENSG00000060140	STYK1	21.7217	-1.20887	0.75011	-1.61159	0.107052	1
ENSG00000060237	WNK1	7689.31	0.170147	0.342911	0.496186	0.619763	1
ENSG00000060339	CCAR1	5656.92	0.0170236	0.454305	0.0374717	0.970109	1
ENSG00000060491	OGFR	9163.05	-0.0720205	0.396943	-0.181438	0.856024	1
ENSG00000060558	GNA15	902.129	0.898624	0.601459	1.49407	0.135156	1
ENSG00000060566	CREB3L3	3.83743	3.01	2.16682	1.38913	0.164793	1
ENSG00000060642	PIGV	775.548	-0.00634557	0.26411	-0.0240262	0.980832	1
ENSG00000060656	PTPRU	8.04996	-2.49751	1.39111	-1.79533	0.0726004	1
ENSG00000060688	SNRNP40	3881.43	-0.0365791	0.316986	-0.115397	0.908131	1
ENSG00000060749	QSER1	858.869	0.137841	0.435475	0.316529	0.751601	1
ENSG00000060762	MPC1	1306.54	-0.0235139	0.225749	-0.10416	0.917043	1
ENSG00000060971	ACAA1	3591.8	0.0361553	0.299494	0.120721	0.903912	1
ENSG00000060982	BCAT1	438.565	-0.863865	0.560458	-1.54135	0.12323	1
ENSG00000061273	HDAC7	13463.9	0.157601	0.262815	0.599665	0.548729	1
ENSG00000061337	LZTS1	105.934	0.0468882	0.423157	0.110805	0.911771	1
ENSG00000061455	PRDM6	11.3491	0.303165	0.657133	0.461345	0.644551	1
ENSG00000061492	WNT8A	1.57447	4.67981	3.02424	1.54743	0.121759	1
ENSG00000061656	SPAG4	57.3251	-0.559701	0.714632	-0.783202	0.433509	1
ENSG00000061676	NCKAP1	271.885	-0.202862	0.672233	-0.301773	0.762825	1
ENSG00000061794	MRPS35	2646.6	0.0378205	0.378105	0.100026	0.920323	1
ENSG00000061918	GUCY1B1	71.9431	-0.300949	0.381649	-0.788548	0.430376	1
ENSG00000061936	SFSWAP	5005.83	0.100285	0.160703	0.624039	0.532602	1
ENSG00000061938	TNK2	7475.2	0.0103598	0.271651	0.0381365	0.969579	1
ENSG00000061987	MON2	2824.89	0.0513089	0.563075	0.0911227	0.927395	1
ENSG00000062038	CDH3	62.4949	-0.978249	0.672314	-1.45505	0.145656	1
ENSG00000062096	ARSF	5.23807	0.724599	1.00118	0.723743	0.469224	1
ENSG00000062194	GPBP1	6505.48	0.0509422	0.449688	0.113283	0.909806	1
ENSG00000062282	DGAT2	142.576	-0.830028	0.764584	-1.08559	0.277659	1
ENSG00000062370	ZNF112	13.9086	-0.605013	0.831076	-0.727988	0.466621	1
ENSG00000062485	CS	9707.49	0.0619194	0.447539	0.138355	0.88996	1
ENSG00000062524	LTK	69.7571	-0.0553922	0.764106	-0.0724929	0.94221	1
ENSG00000062582	MRPS24	3971.73	-0.0935666	0.42184	-0.221806	0.824465	1
ENSG00000062598	ELMO2	2608.08	-0.0265354	0.203546	-0.130366	0.896277	1
ENSG00000062650	WAPL	4452.81	-0.00990637	0.334638	-0.0296032	0.976383	1
ENSG00000062716	VMP1	5963.73	0.021794	0.385667	0.0565098	0.954936	1
ENSG00000062725	APPBP2	2182.97	0.0514401	0.257991	0.199387	0.84196	1
ENSG00000062822	POLD1	4343.56	-0.0516415	0.586007	-0.0881244	0.929778	1
ENSG00000063015	SEZ6	27.3472	-0.758018	0.683085	-1.1097	0.267129	1
ENSG00000063046	EIF4B	46019	0.0392682	0.179787	0.218416	0.827105	1
ENSG00000063127	SLC6A16	145.899	0.0697208	0.359471	0.193954	0.846212	1
ENSG00000063169	BICRA	2051.43	0.0245446	0.28255	0.0868679	0.930777	1
ENSG00000063176	SPHK2	1488.89	-0.177249	0.37777	-0.469198	0.638928	1
ENSG00000063177	RPL18	111859	-0.0984986	0.386458	-0.254875	0.79882	1
ENSG00000063180	CA11	667.005	-0.0055349	0.325455	-0.0170067	0.986431	1
ENSG00000063241	ISOC2	1512.18	-0.108019	0.610459	-0.176947	0.85955	1
ENSG00000063244	U2AF2	16275.9	-0.0918972	0.437702	-0.209954	0.833704	1
ENSG00000063245	EPN1	3988.07	-0.0347674	0.373767	-0.093019	0.925888	1
ENSG00000063322	MED29	2917.54	-0.063827	0.311968	-0.204595	0.837889	1
ENSG00000063438	AHRR	956.599	0.0980041	0.624722	0.156876	0.875342	1
ENSG00000063587	ZNF275	2378.29	0.0424	0.249023	0.170266	0.864801	1
ENSG00000063601	MTMR1	3379.77	0.109694	0.337737	0.324792	0.745339	1
ENSG00000063660	GPC1	264.745	0.151724	0.710838	0.213444	0.83098	1
ENSG00000063761	ADCK1	482.208	0.0166941	0.432483	0.0386007	0.969209	1
ENSG00000063854	HAGH	2772.51	-0.0405666	0.262814	-0.154355	0.87733	1
ENSG00000063978	RNF4	6654.28	-0.0427868	0.253683	-0.168663	0.866062	1
ENSG00000064012	CASP8	4548.45	-0.0448791	0.41954	-0.106972	0.914811	1
ENSG00000064042	LIMCH1	20.4567	0.528794	0.956953	0.552581	0.58055	1
ENSG00000064102	INTS13	1880.22	-0.0109327	0.432203	-0.0252952	0.979819	1
ENSG00000064115	TM7SF3	1424.67	-0.147145	0.283444	-0.519134	0.603667	1
ENSG00000064195	DLX3	3.35667	-2.6477	1.91382	-1.38347	0.166521	1
ENSG00000064199	SPA17	101.135	0.0934406	0.704467	0.13264	0.894478	1
ENSG00000064201	TSPAN32	1069.9	-0.0645291	0.610267	-0.105739	0.915789	1
ENSG00000064205	WISP2	25.26	0.109271	0.514834	0.212245	0.831916	1
ENSG00000064225	ST3GAL6	80.8353	-0.0383673	0.724984	-0.0529216	0.957794	1
ENSG00000064270	ATP2C2	19.2442	-0.228447	0.750245	-0.304497	0.76075	1
ENSG00000064300	NGFR	14.4799	-0.92223	0.841614	-1.09579	0.273172	1
ENSG00000064309	CDON	166.007	0.336606	0.350329	0.960829	0.336638	1
ENSG00000064313	TAF2	1848.9	0.0265613	0.492257	0.0539582	0.956968	1
ENSG00000064393	HIPK2	3179.65	0.0907831	0.214736	0.422767	0.672466	1
ENSG00000064419	TNPO3	3778.87	0.0572897	0.337035	0.169982	0.865025	1
ENSG00000064489	BORCS8-MEF2B	490.244	0.0172683	0.370768	0.0465744	0.962852	1
ENSG00000064490	RFXANK	2729.55	-0.113162	0.43712	-0.258881	0.795727	1
ENSG00000064545	TMEM161A	1637.96	-0.0167987	0.39724	-0.0422885	0.966269	1
ENSG00000064547	LPAR2	2611.35	0.0821786	0.287954	0.285388	0.775347	1
ENSG00000064601	CTSA	4154.98	-0.0769523	0.424285	-0.181369	0.856078	1
ENSG00000064607	SUGP2	5053.51	-0.0326642	0.183911	-0.177608	0.859031	1
ENSG00000064651	SLC12A2	879.961	0.0228626	0.443834	0.0515115	0.958918	1
ENSG00000064652	SNX24	67.8995	-0.529175	0.468455	-1.12962	0.258638	1
ENSG00000064655	EYA2	1.42647	3.03905	3.40569	0.892345	0.372208	1
ENSG00000064666	CNN2	14303.8	-0.0854748	0.378206	-0.226001	0.821201	1
ENSG00000064687	ABCA7	5623.7	0.0570653	0.657786	0.0867536	0.930867	1
ENSG00000064692	SNCAIP	9.11544	-0.0530528	1.09706	-0.0483591	0.96143	1
ENSG00000064703	DDX20	1746.24	0.116127	0.282104	0.411645	0.6806	1
ENSG00000064726	BTBD1	3236.99	0.102001	0.419819	0.242963	0.808034	1
ENSG00000064763	FAR2	319.558	0.0618907	0.428137	0.144558	0.88506	1
ENSG00000064787	BCAS1	18.4295	0.17764	0.726477	0.244522	0.806826	1
ENSG00000064835	POU1F1	4.38411	-0.370142	1.409	-0.262699	0.792782	1
ENSG00000064886	CHI3L2	1192.72	-0.132539	0.522983	-0.253428	0.799937	1
ENSG00000064932	SBNO2	11672.2	0.0924616	0.432797	0.213637	0.83083	1
ENSG00000064933	PMS1	1053.43	-0.0503255	0.482105	-0.104387	0.916862	1
ENSG00000064961	HMG20B	3385.85	-0.035297	0.363333	-0.0971478	0.922609	1
ENSG00000064989	CALCRL	74.7825	0.0687049	0.46982	0.146237	0.883734	1
ENSG00000064995	TAF11	2249.14	-0.130713	0.174846	-0.747591	0.454707	1
ENSG00000064999	ANKS1A	1073.07	0.0335817	0.182262	0.18425	0.853818	1
ENSG00000065000	AP3D1	7895.2	0.000161999	0.259409	0.000624492	0.999502	1
ENSG00000065029	ZNF76	2929.4	0.0559021	0.251879	0.22194	0.82436	1
ENSG00000065054	SLC9A3R2	188.618	-0.142887	0.351079	-0.406994	0.684012	1
ENSG00000065057	NTHL1	717.803	-0.143204	0.512897	-0.279206	0.780087	1
ENSG00000065060	UHRF1BP1	1011.3	-0.0426501	0.323365	-0.131895	0.895068	1
ENSG00000065135	GNAI3	4280.6	0.0417652	0.450511	0.0927062	0.926137	1
ENSG00000065150	IPO5	8445.64	0.0715578	0.421586	0.169735	0.865219	1
ENSG00000065154	OAT	2163.93	-0.161353	0.220418	-0.732032	0.464149	1
ENSG00000065183	WDR3	3380.95	0.20848	0.539814	0.386207	0.699343	1
ENSG00000065243	PKN2	1594.65	-0.0197637	0.504408	-0.0391819	0.968745	1
ENSG00000065268	WDR18	3629.43	-0.298198	0.549096	-0.543071	0.587081	1
ENSG00000065308	TRAM2	719.051	-0.0142489	0.343421	-0.0414912	0.966904	1
ENSG00000065320	NTN1	50.2639	1.27153	0.567484	2.24065	0.025049	1
ENSG00000065328	MCM10	1187.04	-0.0206028	1.22195	-0.0168607	0.986548	1
ENSG00000065357	DGKA	18324.3	0.096219	0.306204	0.314232	0.753345	1
ENSG00000065361	ERBB3	165.307	-0.517994	0.590305	-0.877503	0.380213	1
ENSG00000065371	ROPN1	2.54452	0.284146	1.52999	0.185718	0.852666	1
ENSG00000065413	ANKRD44	7944.48	0.122227	0.272109	0.449183	0.653299	1
ENSG00000065427	KARS	12278.9	-0.0418974	0.472684	-0.0886371	0.92937	1
ENSG00000065457	ADAT1	912.434	0.000895664	0.264679	0.00338397	0.9973	1
ENSG00000065485	PDIA5	578.667	0.156248	0.571908	0.273204	0.784696	1
ENSG00000065491	TBC1D22B	1031.62	-0.040462	0.29525	-0.137043	0.890997	1
ENSG00000065518	NDUFB4	4168.27	-0.0300508	0.312956	-0.0960225	0.923503	1
ENSG00000065526	SPEN	4955.84	-0.105217	0.27121	-0.387954	0.69805	1
ENSG00000065534	MYLK	168.658	0.594587	0.425697	1.39674	0.162493	1
ENSG00000065548	ZC3H15	4699.13	0.0734432	0.48092	0.152714	0.878624	1
ENSG00000065559	MAP2K4	1825.2	0.114606	0.318805	0.359487	0.71923	1
ENSG00000065600	TMEM206	552.047	0.126739	0.261641	0.484399	0.628103	1
ENSG00000065613	SLK	2496.81	-0.00592692	0.612144	-0.00968224	0.992275	1
ENSG00000065615	CYB5R4	1548	0.078165	0.558056	0.140067	0.888607	1
ENSG00000065618	COL17A1	3.4211	0.299249	1.62144	0.184558	0.853576	1
ENSG00000065621	GSTO2	189.139	0.0751625	0.382888	0.196304	0.844372	1
ENSG00000065665	SEC61A2	633.212	0.122744	0.30531	0.402031	0.687662	1
ENSG00000065675	PRKCQ	3690.35	0.0550022	0.185147	0.297072	0.766411	1
ENSG00000065717	TLE2	1365.96	0.0259573	0.344887	0.0752633	0.940005	1
ENSG00000065802	ASB1	2949.82	-0.0317896	0.397439	-0.079986	0.936248	1
ENSG00000065809	FAM107B	10613.1	0.127476	0.322287	0.395534	0.692449	1
ENSG00000065833	ME1	30.9238	-0.88542	0.530675	-1.66848	0.0952204	1
ENSG00000065882	TBC1D1	3419.56	-0.0207371	0.410775	-0.0504829	0.959738	1
ENSG00000065883	CDK13	5089.83	0.0106009	0.210517	0.0503566	0.959838	1
ENSG00000065911	MTHFD2	11337.3	0.35919	0.458955	0.782625	0.433847	1
ENSG00000065923	SLC9A7	943.365	-0.0745589	0.477629	-0.156102	0.875953	1
ENSG00000065970	FOXJ2	2248.39	0.0440795	0.288248	0.152922	0.87846	1
ENSG00000065978	YBX1	46095.9	-0.0711144	0.532867	-0.133456	0.893833	1
ENSG00000065989	PDE4A	358.222	0.346233	0.454514	0.761765	0.4462	1
ENSG00000066027	PPP2R5A	3340.82	0.0849985	0.22761	0.37344	0.708821	1
ENSG00000066032	CTNNA2	9.40749	1.93656	1.38083	1.40246	0.160778	1
ENSG00000066044	ELAVL1	7171.13	0.079345	0.433675	0.18296	0.85483	1
ENSG00000066056	TIE1	56.9335	-0.112586	0.46736	-0.240897	0.809635	1
ENSG00000066084	DIP2B	2791.73	0.0763611	0.231689	0.329585	0.741714	1
ENSG00000066117	SMARCD1	3945.9	0.0968668	0.368419	0.262926	0.792608	1
ENSG00000066135	KDM4A	1785.72	0.0762668	0.224631	0.33952	0.734218	1
ENSG00000066136	NFYC	3368.67	0.0372947	0.295153	0.126357	0.899449	1
ENSG00000066185	ZMYND12	26.6298	-0.241937	0.629329	-0.384436	0.700655	1
ENSG00000066230	SLC9A3	637.136	-0.0114927	0.293665	-0.0391353	0.968782	1
ENSG00000066248	NGEF	3.25412	-0.975146	1.32803	-0.734282	0.462777	1
ENSG00000066279	ASPM	251.871	-0.205458	1.23292	-0.166643	0.867651	1
ENSG00000066294	CD84	2458.39	0.122475	0.297952	0.411057	0.681031	1
ENSG00000066322	ELOVL1	2750.83	-0.036311	0.463381	-0.078361	0.937541	1
ENSG00000066336	SPI1	488.78	0.00333759	0.55552	0.00600804	0.995206	1
ENSG00000066379	ZNRD1	2428.35	-0.0404062	0.387144	-0.10437	0.916876	1
ENSG00000066382	MPPED2	53.3216	-0.0960574	0.522177	-0.183956	0.854048	1
ENSG00000066405	CLDN18	4.31843	0.0122137	0.8078	0.0151197	0.987937	1
ENSG00000066422	ZBTB11	3202.89	0.0806456	0.446582	0.180584	0.856694	1
ENSG00000066427	ATXN3	1721.86	0.139004	0.369414	0.376282	0.706707	1
ENSG00000066455	GOLGA5	1316.93	-0.0628259	0.446361	-0.140751	0.888066	1
ENSG00000066468	FGFR2	73.3178	0.560721	0.762914	0.734973	0.462356	1
ENSG00000066557	LRRC40	1095.66	-0.00288494	0.585625	-0.00492625	0.996069	1
ENSG00000066583	ISOC1	1368	-0.0229623	0.316058	-0.0726524	0.942083	1
ENSG00000066629	EML1	56.7902	0.297831	0.482039	0.617856	0.53667	1
ENSG00000066651	TRMT11	944.755	0.107235	0.4342	0.246971	0.80493	1
ENSG00000066654	THUMPD1	4583.4	0.0680242	0.495588	0.13726	0.890825	1
ENSG00000066697	MSANTD3	625.168	0.0843917	0.299688	0.281598	0.778252	1
ENSG00000066735	KIF26A	21.5212	0.20456	0.553067	0.369864	0.711484	1
ENSG00000066739	ATG2B	2546.3	0.191529	0.519308	0.368815	0.712266	1
ENSG00000066777	ARFGEF1	3665.01	-0.020021	0.447432	-0.0447464	0.964309	1
ENSG00000066813	ACSM2B	52.7932	-0.392116	0.498768	-0.786169	0.431769	1
ENSG00000066827	ZFAT	469.571	0.140107	0.275991	0.50765	0.611699	1
ENSG00000066855	MTFR1	980.688	0.249893	0.552304	0.452456	0.650941	1
ENSG00000066923	STAG3	1321.2	-0.0934028	0.492281	-0.189735	0.849517	1
ENSG00000066926	FECH	1015	0.0248349	0.347954	0.0713743	0.9431	1
ENSG00000066933	MYO9A	1537.9	0.0891532	0.384209	0.232044	0.816504	1
ENSG00000067048	DDX3Y	5438.89	0.163519	0.645546	0.253303	0.800034	1
ENSG00000067057	PFKP	7402.15	0.153721	0.651341	0.236007	0.813427	1
ENSG00000067064	IDI1	3688.96	-0.045875	0.497751	-0.0921645	0.926567	1
ENSG00000067066	SP100	4701.9	0.0990002	0.290561	0.340721	0.733314	1
ENSG00000067082	KLF6	10022.6	0.0337726	0.298206	0.113252	0.909831	1
ENSG00000067113	PLPP1	675.453	-0.1444	0.411972	-0.350509	0.725957	1
ENSG00000067141	NEO1	557.845	-0.256649	0.408779	-0.627844	0.530106	1
ENSG00000067167	TRAM1	10756	0.0261357	0.399355	0.0654447	0.94782	1
ENSG00000067177	PHKA1	170.017	-0.127202	0.82033	-0.155062	0.876772	1
ENSG00000067182	TNFRSF1A	3576.57	-0.0021329	0.291404	-0.00731938	0.99416	1
ENSG00000067191	CACNB1	542.526	0.00118446	0.445928	0.00265616	0.997881	1
ENSG00000067208	EVI5	283.446	0.147991	0.694773	0.213006	0.831323	1
ENSG00000067221	STOML1	954.628	0.062552	0.352801	0.177301	0.859272	1
ENSG00000067225	PKM	69247.8	-0.0102031	0.80984	-0.0125989	0.989948	1
ENSG00000067248	DHX29	1282.76	0.0961667	0.463398	0.207525	0.8356	1
ENSG00000067334	DNTTIP2	3761.73	0.0453005	0.548097	0.0826505	0.934129	1
ENSG00000067365	METTL22	690.065	0.115206	0.183147	0.629036	0.529325	1
ENSG00000067369	TP53BP1	2298.13	0.318057	0.211386	1.50463	0.13242	1
ENSG00000067445	TRO	206.016	-0.0390307	0.501663	-0.0778027	0.937985	1
ENSG00000067533	RRP15	2354	0.288819	0.596637	0.484078	0.62833	1
ENSG00000067560	RHOA	26337	-0.0548813	0.406283	-0.135081	0.892547	1
ENSG00000067596	DHX8	3110.84	0.19908	0.271122	0.734282	0.462777	1
ENSG00000067601	PMS2P4	44.6461	-0.315252	0.426158	-0.739755	0.459449	1
ENSG00000067606	PRKCZ	940.286	-0.117911	0.349612	-0.337263	0.735919	1
ENSG00000067646	ZFY	568.945	-0.725433	0.747279	-0.970766	0.331665	1
ENSG00000067704	IARS2	4507.93	0.0169499	0.334948	0.0506046	0.959641	1
ENSG00000067715	SYT1	3.40858	1.43502	1.31988	1.08724	0.276932	1
ENSG00000067798	NAV3	38.2752	-0.631609	0.676547	-0.933577	0.350522	1
ENSG00000067829	IDH3G	3027.48	-0.122432	0.443252	-0.276213	0.782384	1
ENSG00000067836	ROGDI	428.367	-0.24569	0.491675	-0.499699	0.617287	1
ENSG00000067840	PDZD4	198.945	-0.296543	0.471417	-0.629048	0.529318	1
ENSG00000067900	ROCK1	4652.56	0.0679537	0.625001	0.108726	0.91342	1
ENSG00000067955	CBFB	8710.42	0.107513	0.450412	0.238699	0.811339	1
ENSG00000067992	PDK3	713.426	0.066494	0.506399	0.131307	0.895532	1
ENSG00000068001	HYAL2	516.47	-0.191284	0.680688	-0.281016	0.778698	1
ENSG00000068024	HDAC4	1846.96	0.0830189	0.235471	0.352565	0.724414	1
ENSG00000068028	RASSF1	2954.04	-0.0334504	0.189572	-0.176453	0.859938	1
ENSG00000068078	FGFR3	15.5468	-0.180968	0.828119	-0.218529	0.827017	1
ENSG00000068079	IFI35	3080.38	-0.0596003	0.608224	-0.0979907	0.92194	1
ENSG00000068097	HEATR6	705.579	-0.169504	0.391181	-0.433314	0.664787	1
ENSG00000068120	COASY	3651.74	0.0174207	0.454207	0.0383541	0.969405	1
ENSG00000068137	PLEKHH3	32.3044	-0.936612	0.693943	-1.3497	0.177114	1
ENSG00000068305	MEF2A	2093.74	0.125893	0.353021	0.356617	0.721378	1
ENSG00000068308	OTUD5	6056.49	0.00589235	0.33316	0.0176862	0.985889	1
ENSG00000068323	TFE3	2912.96	0.14124	0.303128	0.465943	0.641257	1
ENSG00000068354	TBC1D25	1719.39	-0.0399308	0.260314	-0.153395	0.878087	1
ENSG00000068366	ACSL4	2690.27	0.129482	0.54035	0.239625	0.810621	1
ENSG00000068383	INPP5A	799.459	-0.0415814	0.165955	-0.250559	0.802155	1
ENSG00000068394	GPKOW	1546.6	-0.0568401	0.328063	-0.17326	0.862447	1
ENSG00000068400	GRIPAP1	4203.88	0.111233	0.220849	0.503663	0.614498	1
ENSG00000068438	FTSJ1	3400.25	0.0434544	0.393732	0.110365	0.91212	1
ENSG00000068489	PRR11	599.381	-0.0757705	0.843946	-0.0897812	0.928461	1
ENSG00000068615	REEP1	23.2983	0.520218	0.670066	0.776369	0.437531	1
ENSG00000068650	ATP11A	1742.94	-0.0373204	0.457789	-0.081523	0.935026	1
ENSG00000068654	POLR1A	4015.3	0.0932385	0.667952	0.139589	0.888985	1
ENSG00000068697	LAPTM4A	3633.65	0.0190224	0.204675	0.0929395	0.925952	1
ENSG00000068724	TTC7A	3856.15	0.18369	0.478403	0.383966	0.701004	1
ENSG00000068745	IP6K2	3449.82	-0.0183723	0.141614	-0.129735	0.896776	1
ENSG00000068784	SRBD1	898.078	0.00996366	0.346004	0.0287963	0.977027	1
ENSG00000068796	KIF2A	4250.21	0.187131	0.449092	0.416687	0.676907	1
ENSG00000068831	RASGRP2	15688.8	0.0103052	0.771463	0.013358	0.989342	1
ENSG00000068878	PSME4	3049.92	-0.0965652	0.304856	-0.316757	0.751428	1
ENSG00000068885	IFT80	823.804	0.298638	0.535663	0.557511	0.577178	1
ENSG00000068903	SIRT2	1972.67	-0.0358132	0.266734	-0.134266	0.893192	1
ENSG00000068912	ERLEC1	2015.16	0.0284758	0.294647	0.0966437	0.923009	1
ENSG00000068971	PPP2R5B	629.89	0.138036	0.253593	0.54432	0.586221	1
ENSG00000068976	PYGM	454.841	-0.102477	0.576749	-0.177681	0.858974	1
ENSG00000069011	PITX1	12.0226	-1.07577	0.845535	-1.27229	0.203269	1
ENSG00000069020	MAST4	1533.55	0.278453	0.282832	0.984517	0.324861	1
ENSG00000069122	ADGRF5	1.2599	1.1733	1.74148	0.67374	0.500477	1
ENSG00000069188	SDK2	777.587	0.440906	0.740685	0.595267	0.551665	1
ENSG00000069248	NUP133	2857.03	-0.00396187	0.306732	-0.0129164	0.989695	1
ENSG00000069275	NUCKS1	12893.1	-0.191231	0.341409	-0.560124	0.575395	1
ENSG00000069329	VPS35	5386.17	0.150409	0.240864	0.624456	0.532328	1
ENSG00000069345	DNAJA2	5471.78	0.150104	0.292054	0.513961	0.607279	1
ENSG00000069399	BCL3	3273.62	0.742728	0.724107	1.02572	0.305026	1
ENSG00000069424	KCNAB2	12717.7	-0.00456704	0.368573	-0.0123911	0.990114	1
ENSG00000069431	ABCC9	181.803	-0.044758	0.458868	-0.0975399	0.922298	1
ENSG00000069482	GAL	47.1731	-2.37076	2.44153	-0.971013	0.331542	1
ENSG00000069493	CLEC2D	14947.2	0.145893	0.428424	0.340534	0.733454	1
ENSG00000069509	FUNDC1	483.662	-0.00993341	0.362355	-0.0274135	0.97813	1
ENSG00000069535	MAOB	7.65767	0.721469	0.750023	0.961929	0.336085	1
ENSG00000069667	RORA	3579.31	0.0978944	0.402016	0.243509	0.807611	1
ENSG00000069696	DRD4	82.2807	-0.23547	0.586491	-0.401489	0.68806	1
ENSG00000069702	TGFBR3	643.517	0.11826	0.329052	0.359397	0.719298	1
ENSG00000069764	PLA2G10	21.04	0.359787	0.545863	0.659117	0.509821	1
ENSG00000069812	HES2	18.3982	-0.0610221	0.596829	-0.102244	0.918563	1
ENSG00000069849	ATP1B3	3519.71	-0.233548	0.624767	-0.373816	0.708541	1
ENSG00000069869	NEDD4	957.926	-0.0567023	0.432716	-0.131038	0.895745	1
ENSG00000069943	PIGB	707.652	-0.139763	0.270968	-0.515793	0.605999	1
ENSG00000069956	MAPK6	1877.78	0.128378	0.519636	0.247053	0.804867	1
ENSG00000069966	GNB5	1702.73	-0.0962745	0.275505	-0.349447	0.726753	1
ENSG00000069974	RAB27A	3581.09	0.0208674	0.528481	0.0394857	0.968503	1
ENSG00000069998	HDHD5	3012.03	0.0241636	0.344464	0.0701483	0.944076	1
ENSG00000070010	UFD1	4528.72	-0.0698761	0.453539	-0.154068	0.877556	1
ENSG00000070018	LRP6	335.328	0.260892	0.428266	0.609184	0.542403	1
ENSG00000070031	SCT	8.57005	0.269838	0.888118	0.303831	0.761257	1
ENSG00000070047	PHRF1	6086.54	0.0191297	0.346874	0.0551489	0.95602	1
ENSG00000070061	ELP1	3015.58	-0.27355	0.24832	-1.1016	0.270634	1
ENSG00000070081	NUCB2	3546.19	-0.0507536	0.417511	-0.121562	0.903246	1
ENSG00000070087	PFN2	371.857	-0.0265484	0.465932	-0.0569791	0.954562	1
ENSG00000070159	PTPN3	80.7351	-0.104227	0.474259	-0.219769	0.826051	1
ENSG00000070182	SPTB	38.9293	0.118481	0.523908	0.226149	0.821086	1
ENSG00000070190	DAPP1	2102.55	0.0364568	0.6203	0.0587729	0.953133	1
ENSG00000070214	SLC44A1	1206.32	0.0972389	0.390574	0.248964	0.803388	1
ENSG00000070269	TMEM260	983.42	0.0987319	0.496068	0.199029	0.84224	1
ENSG00000070366	SMG6	3501.92	0.0182368	0.335938	0.0542863	0.956707	1
ENSG00000070367	EXOC5	2770.29	0.279676	0.610131	0.458387	0.646675	1
ENSG00000070371	CLTCL1	41.0517	-0.666016	0.592397	-1.12427	0.260897	1
ENSG00000070388	FGF22	21.2394	0.407997	0.527196	0.7739	0.43899	1
ENSG00000070404	FSTL3	364.943	-0.171566	0.261335	-0.656499	0.511503	1
ENSG00000070413	DGCR2	4822.32	-0.0478004	0.219653	-0.217618	0.827727	1
ENSG00000070423	RNF126	6463.7	0.0266846	0.341888	0.0780507	0.937788	1
ENSG00000070444	MNT	1735.01	-0.053946	0.211847	-0.254646	0.798997	1
ENSG00000070476	ZXDC	2549.49	-0.00514484	0.184473	-0.0278894	0.97775	1
ENSG00000070495	JMJD6	2173.65	0.00501645	0.327977	0.0152951	0.987797	1
ENSG00000070501	POLB	1264.38	0.120975	0.169084	0.715474	0.474316	1
ENSG00000070526	ST6GALNAC1	120.654	-0.0840592	0.591639	-0.142079	0.887018	1
ENSG00000070540	WIPI1	502.541	-0.0519113	0.201147	-0.258077	0.796348	1
ENSG00000070601	FRMPD1	21.831	-0.0286608	0.538929	-0.0531811	0.957588	1
ENSG00000070610	GBA2	2097.09	-0.0723068	0.242665	-0.29797	0.765726	1
ENSG00000070614	NDST1	325.384	-0.334864	0.55765	-0.60049	0.548179	1
ENSG00000070669	ASNS	4137.83	-0.0651626	0.544323	-0.119713	0.90471	1
ENSG00000070718	AP3M2	3204.32	0.0880948	0.251536	0.350227	0.726168	1
ENSG00000070729	CNGB1	34.0508	0.0596098	0.509153	0.117076	0.9068	1
ENSG00000070731	ST6GALNAC2	32.4798	-0.533233	0.629917	-0.846513	0.397267	1
ENSG00000070748	CHAT	2.63474	0.656492	1.1526	0.569576	0.568965	1
ENSG00000070756	PABPC1	167765	0.0247374	0.178048	0.138937	0.8895	1
ENSG00000070759	TESK2	462.965	-0.0199326	0.26169	-0.0761688	0.939285	1
ENSG00000070761	CFAP20	2277.83	-0.0700529	0.421592	-0.166163	0.868029	1
ENSG00000070770	CSNK2A2	4237.17	-0.00783402	0.157298	-0.0498035	0.960279	1
ENSG00000070778	PTPN21	7.72648	-1.264	0.87616	-1.44266	0.149115	1
ENSG00000070785	EIF2B3	1237.66	-0.167551	0.517953	-0.323486	0.746327	1
ENSG00000070808	CAMK2A	7.78901	-0.53384	1.07171	-0.49812	0.618399	1
ENSG00000070814	TCOF1	8623.83	-0.00844125	0.516748	-0.0163354	0.986967	1
ENSG00000070831	CDC42	13427	0.0121398	0.277025	0.043822	0.965046	1
ENSG00000070882	OSBPL3	1899.3	0.0980692	0.529918	0.185065	0.853178	1
ENSG00000070886	EPHA8	3.3146	-0.276645	1.25924	-0.219692	0.826111	1
ENSG00000070915	SLC12A3	12.3979	-0.564623	1.12397	-0.502346	0.615424	1
ENSG00000070950	RAD18	1276.67	0.137821	0.620454	0.22213	0.824213	1
ENSG00000070961	ATP2B1	2192.33	0.0564301	0.440066	0.128231	0.897966	1
ENSG00000070985	TRPM5	11.9441	0.518011	0.776762	0.666885	0.504846	1
ENSG00000071051	NCK2	5446.29	-0.0220467	0.14063	-0.156771	0.875426	1
ENSG00000071054	MAP4K4	7748.93	0.140811	0.125891	1.11851	0.263349	1
ENSG00000071073	MGAT4A	6631.74	-0.00436074	0.518223	-0.00841479	0.993286	1
ENSG00000071082	RPL31	86986.9	-0.104531	0.243772	-0.428806	0.668064	1
ENSG00000071127	WDR1	25737.3	0.0815089	0.501073	0.162668	0.870779	1
ENSG00000071189	SNX13	1135.61	0.241901	0.359839	0.672248	0.501426	1
ENSG00000071205	ARHGAP10	236.772	0.0657116	0.406154	0.16179	0.871471	1
ENSG00000071242	RPS6KA2	1337.83	0.0239843	0.396943	0.0604225	0.951819	1
ENSG00000071243	ING3	1249.89	0.0511508	0.330016	0.154995	0.876825	1
ENSG00000071246	VASH1	1122.81	0.106912	0.347117	0.308	0.758083	1
ENSG00000071282	LMCD1	120.58	0.758594	0.97503	0.778021	0.436557	1
ENSG00000071462	BUD23	6221.35	-0.0948937	0.422613	-0.224541	0.822337	1
ENSG00000071537	SEL1L	3581.96	0.0658601	0.377886	0.174285	0.861641	1
ENSG00000071539	TRIP13	913.375	-0.835803	0.893311	-0.935623	0.349467	1
ENSG00000071553	ATP6AP1	4150.01	-0.0652346	0.324712	-0.2009	0.840777	1
ENSG00000071564	TCF3	6250.45	0.100895	0.367673	0.274414	0.783766	1
ENSG00000071575	TRIB2	3900.68	-0.0931159	0.366143	-0.254316	0.799252	1
ENSG00000071626	DAZAP1	13994.4	0.0700706	0.349293	0.200607	0.841006	1
ENSG00000071655	MBD3	9520.02	-0.121229	0.512637	-0.23648	0.81306	1
ENSG00000071794	HLTF	1110.34	-0.0296074	0.537243	-0.0551099	0.956051	1
ENSG00000071859	FAM50A	3231.14	-0.0701764	0.353016	-0.198791	0.842426	1
ENSG00000071889	FAM3A	2655.22	-0.0290943	0.315325	-0.0922677	0.926485	1
ENSG00000071894	CPSF1	6846.21	-0.0466869	0.299596	-0.155833	0.876165	1
ENSG00000071909	MYO3B	15.6686	-0.490838	0.724215	-0.677751	0.49793	1
ENSG00000071967	CYBRD1	100.785	-0.300304	0.443262	-0.677486	0.498097	1
ENSG00000071991	CDH19	4.77442	0.278564	1.15675	0.240816	0.809698	1
ENSG00000071994	PDCD2	5868.86	0.0598123	0.347104	0.172318	0.863187	1
ENSG00000072042	RDH11	3212.17	0.0494648	0.20634	0.239724	0.810544	1
ENSG00000072062	PRKACA	3570.23	-0.0517398	0.448964	-0.115243	0.908253	1
ENSG00000072071	ADGRL1	2623.53	-0.0389503	0.251511	-0.154866	0.876927	1
ENSG00000072080	SPP2	4.81648	-2.10937	1.11171	-1.8974	0.0577749	1
ENSG00000072110	ACTN1	10379.7	-0.0531335	0.346877	-0.153177	0.878259	1
ENSG00000072121	ZFYVE26	1632.63	-0.0286255	0.242933	-0.117833	0.9062	1
ENSG00000072133	RPS6KA6	61.0024	-0.23802	0.409286	-0.581548	0.560871	1
ENSG00000072134	EPN2	309.713	0.131445	0.248157	0.529684	0.596331	1
ENSG00000072135	PTPN18	3953.55	0.000336884	0.391919	0.000859575	0.999314	1
ENSG00000072163	LIMS2	1074.38	-0.151963	0.455776	-0.333417	0.73882	1
ENSG00000072182	ASIC4	27.6111	0.242402	0.758134	0.319735	0.749169	1
ENSG00000072195	SPEG	572.355	0.13599	0.559062	0.243247	0.807814	1
ENSG00000072201	LNX1	163.481	-0.432949	0.561362	-0.771248	0.44056	1
ENSG00000072210	ALDH3A2	1514.26	0.0764826	0.299236	0.255593	0.798265	1
ENSG00000072274	TFRC	7672.72	0.158592	0.690128	0.229801	0.818246	1
ENSG00000072310	SREBF1	2966.46	0.093793	0.296699	0.316121	0.75191	1
ENSG00000072315	TRPC5	1.56979	0.620466	1.76418	0.351701	0.725062	1
ENSG00000072364	AFF4	3412.21	0.206923	0.388468	0.532665	0.594265	1
ENSG00000072401	UBE2D1	1119.88	0.0417674	0.373609	0.111794	0.910987	1
ENSG00000072415	MPP5	806.484	0.0475262	0.413845	0.114841	0.908571	1
ENSG00000072422	RHOBTB1	15.1863	-0.0934516	0.902514	-0.103546	0.91753	1
ENSG00000072501	SMC1A	8862.7	0.232089	0.557633	0.416204	0.677261	1
ENSG00000072506	HSD17B10	4064.99	-0.13771	0.622446	-0.22124	0.824906	1
ENSG00000072518	MARK2	3833.2	0.00134186	0.22918	0.00585504	0.995328	1
ENSG00000072571	HMMR	412.133	1.07601	1.22609	0.877593	0.380165	1
ENSG00000072609	CHFR	3672.55	-0.0254888	0.149022	-0.17104	0.864192	1
ENSG00000072657	TRHDE	17.4413	-0.476615	0.622979	-0.765058	0.444237	1
ENSG00000072682	P4HA2	99.448	-0.196877	0.475712	-0.413857	0.678978	1
ENSG00000072694	FCGR2B	396.384	-0.192916	0.838717	-0.230013	0.818081	1
ENSG00000072736	NFATC3	5241.1	0.168022	0.282859	0.594013	0.552504	1
ENSG00000072756	TRNT1	1483.13	0.0421322	0.279883	0.150535	0.880343	1
ENSG00000072778	ACADVL	6696.13	0.114013	0.338651	0.336667	0.736368	1
ENSG00000072786	STK10	11715.8	0.0358084	0.29534	0.121245	0.903497	1
ENSG00000072803	FBXW11	2470.25	0.191642	0.217067	0.88287	0.377307	1
ENSG00000072818	ACAP1	12757.9	-0.0322684	0.334468	-0.0964768	0.923142	1
ENSG00000072832	CRMP1	7.7404	1.69118	0.892033	1.89587	0.0579767	1
ENSG00000072840	EVC	28.3343	-0.0705536	0.871	-0.0810031	0.93544	1
ENSG00000072849	DERL2	2599.06	-0.127932	0.239154	-0.534937	0.592693	1
ENSG00000072858	SIDT1	1910.86	-0.19412	0.330723	-0.586957	0.557233	1
ENSG00000072864	NDE1	2022.39	0.263894	0.428503	0.615851	0.537993	1
ENSG00000072952	MRVI1	4.94059	0.28194	1.42786	0.197456	0.843471	1
ENSG00000072954	TMEM38A	61.0399	1.1267	0.44425	2.53618	0.0112069	1
ENSG00000072958	AP1M1	6817.47	-0.0462	0.362121	-0.127582	0.89848	1
ENSG00000073008	PVR	382.05	0.165246	0.658474	0.250952	0.801851	1
ENSG00000073050	XRCC1	2390.59	0.0484389	0.276798	0.174997	0.861082	1
ENSG00000073060	SCARB1	559.303	-0.291149	0.581391	-0.500781	0.616525	1
ENSG00000073067	CYP2W1	5.85564	0.771486	1.12289	0.687054	0.492049	1
ENSG00000073111	MCM2	8853.97	0.0201599	0.799571	0.0252134	0.979885	1
ENSG00000073146	MOV10L1	3.76676	0.268782	0.97522	0.275612	0.782846	1
ENSG00000073150	PANX2	69.1446	0.443712	0.70447	0.629851	0.528792	1
ENSG00000073169	SELENOO	2815.62	-0.0906651	0.215867	-0.420004	0.674482	1
ENSG00000073282	TP63	7.85526	0.221801	1.03477	0.214349	0.830275	1
ENSG00000073331	ALPK1	1366.86	0.215418	0.250277	0.860718	0.389393	1
ENSG00000073350	LLGL2	1375.02	-0.0880478	0.333476	-0.26403	0.791757	1
ENSG00000073417	PDE8A	1139.89	-0.0174394	0.278441	-0.0626321	0.950059	1
ENSG00000073464	CLCN4	29.7261	1.14386	0.928283	1.23223	0.217862	1
ENSG00000073536	NLE1	2696.93	-0.00847194	0.626896	-0.0135141	0.989218	1
ENSG00000073578	SDHA	6972.76	-0.0561624	0.344221	-0.163158	0.870394	1
ENSG00000073584	SMARCE1	6040.35	0.0836686	0.275369	0.303842	0.761248	1
ENSG00000073598	FNDC8	21.6251	-0.468495	0.57084	-0.820711	0.411811	1
ENSG00000073605	GSDMB	2084.8	0.0452234	0.448126	0.100917	0.919617	1
ENSG00000073614	KDM5A	4603.47	-0.181014	0.25399	-0.712683	0.476042	1
ENSG00000073670	ADAM11	35.4138	-0.0907372	0.647509	-0.140133	0.888555	1
ENSG00000073711	PPP2R3A	96.7431	-0.428166	0.555448	-0.770848	0.440797	1
ENSG00000073712	FERMT2	39.902	-0.448831	0.47089	-0.953154	0.340512	1
ENSG00000073734	ABCB11	18.0076	0.292593	1.55494	0.188171	0.850743	1
ENSG00000073737	DHRS9	45.8927	0.226904	1.17014	0.193912	0.846245	1
ENSG00000073756	PTGS2	37.9314	0.516213	0.598826	0.862043	0.388664	1
ENSG00000073792	IGF2BP2	94.1297	-0.492296	0.448233	-1.0983	0.272072	1
ENSG00000073803	MAP3K13	884.193	-0.273147	0.273373	-0.999173	0.317711	1
ENSG00000073849	ST6GAL1	13633.7	0.0170371	0.241265	0.070616	0.943703	1
ENSG00000073861	TBX21	4710.15	0.0501893	0.912272	0.0550157	0.956126	1
ENSG00000073905	VDAC1P1	2.07201	-0.856028	1.97837	-0.432693	0.665238	1
ENSG00000073910	FRY	722.021	0.347949	0.615232	0.565558	0.571694	1
ENSG00000073921	PICALM	3906.58	0.0148605	0.380701	0.0390347	0.968863	1
ENSG00000073969	NSF	1288.19	0.188272	0.265754	0.708445	0.478669	1
ENSG00000074054	CLASP1	2821.5	0.0763329	0.334338	0.228311	0.819405	1
ENSG00000074071	MRPS34	6068.6	-0.155654	0.507019	-0.306998	0.758845	1
ENSG00000074181	NOTCH3	17.9443	0.233379	0.666849	0.349973	0.726359	1
ENSG00000074201	CLNS1A	5241.65	-0.00689016	0.234943	-0.0293269	0.976604	1
ENSG00000074211	PPP2R2C	7.21277	-1.23722	0.888298	-1.3928	0.16368	1
ENSG00000074219	TEAD2	33.3117	0.333563	0.528216	0.631491	0.527719	1
ENSG00000074266	EED	3156.17	0.0777547	0.401625	0.1936	0.846489	1
ENSG00000074276	CDHR2	45.8131	0.882132	0.663187	1.33014	0.183472	1
ENSG00000074317	SNCB	0.938171	0	3.66308	0	1	1
ENSG00000074319	TSG101	2260.31	-0.0883348	0.24425	-0.361656	0.717609	1
ENSG00000074356	NCBP3	3296.92	-0.0324922	0.288846	-0.11249	0.910435	1
ENSG00000074370	ATP2A3	14357.9	0.0154846	0.396415	0.0390615	0.968841	1
ENSG00000074410	CA12	22.2978	0.612011	0.643597	0.950923	0.341643	1
ENSG00000074416	MGLL	340.588	-0.00765196	0.455806	-0.0167877	0.986606	1
ENSG00000074527	NTN4	30.9089	-1.0061	0.511796	-1.96582	0.0493199	1
ENSG00000074582	BCS1L	1697.37	8.73925e-05	0.342539	0.000255132	0.999796	1
ENSG00000074590	NUAK1	5.68919	-1.69867	1.08838	-1.56073	0.118587	1
ENSG00000074603	DPP8	2730.84	0.143727	0.336311	0.427363	0.669115	1
ENSG00000074621	SLC24A1	514.69	0.16415	0.215414	0.762019	0.446049	1
ENSG00000074657	ZNF532	233.729	-0.277056	0.349377	-0.793	0.427778	1
ENSG00000074660	SCARF1	158.49	-0.258932	0.413841	-0.625679	0.531525	1
ENSG00000074695	LMAN1	5535.95	0.240133	0.500284	0.479992	0.631233	1
ENSG00000074696	HACD3	2747.35	0.0339744	0.326778	0.103968	0.917195	1
ENSG00000074706	IPCEF1	3632.35	0.148595	0.313544	0.47392	0.635557	1
ENSG00000074755	ZZEF1	5307.98	0.1398	0.248539	0.562488	0.573783	1
ENSG00000074800	ENO1	123558	-0.0604216	0.82098	-0.0735969	0.941331	1
ENSG00000074803	SLC12A1	10.6209	-1.34616	1.13859	-1.1823	0.237085	1
ENSG00000074842	MYDGF	4544.17	-0.0503876	0.452078	-0.111458	0.911253	1
ENSG00000074855	ANO8	714.461	-0.137531	0.38486	-0.357353	0.720828	1
ENSG00000074935	TUBE1	2054.82	0.0365006	0.293967	0.124166	0.901184	1
ENSG00000074964	ARHGEF10L	8.80798	0.440539	1.00455	0.438544	0.660992	1
ENSG00000074966	TXK	2383.2	0.0873171	0.514097	0.169846	0.865132	1
ENSG00000075035	WSCD2	4.78381	-0.0357019	1.577	-0.0226392	0.981938	1
ENSG00000075043	KCNQ2	16.9398	-1.73657	1.10503	-1.57152	0.116062	1
ENSG00000075073	TACR2	22.7124	0.534762	0.55435	0.964666	0.334712	1
ENSG00000075089	ACTR6	1486.53	-0.0987371	0.521785	-0.18923	0.849913	1
ENSG00000075131	TIPIN	816.148	-0.112146	0.591721	-0.189525	0.849682	1
ENSG00000075142	SRI	3693.16	0.0862566	0.422094	0.204354	0.838077	1
ENSG00000075151	EIF4G3	1565.65	0.36431	0.481728	0.756256	0.449496	1
ENSG00000075188	NUP37	1296.41	0.0454717	0.501358	0.090697	0.927733	1
ENSG00000075213	SEMA3A	18.297	-0.335669	1.19089	-0.281864	0.778048	1
ENSG00000075218	GTSE1	802.791	0.265233	0.884552	0.29985	0.764292	1
ENSG00000075223	SEMA3C	86.1273	0.449219	0.613596	0.732108	0.464103	1
ENSG00000075234	TTC38	443.383	-0.0362561	0.444108	-0.081638	0.934935	1
ENSG00000075239	ACAT1	1510.04	-0.145742	0.401916	-0.362618	0.71689	1
ENSG00000075240	GRAMD4	1973.78	0.012291	0.431673	0.0284729	0.977285	1
ENSG00000075275	CELSR1	270.1	-0.0707967	0.442732	-0.159909	0.872953	1
ENSG00000075290	WNT8B	16.6395	0.852036	0.604191	1.41021	0.158478	1
ENSG00000075292	ZNF638	4265.46	-0.0216122	0.571123	-0.0378415	0.969814	1
ENSG00000075303	SLC25A40	1511.01	0.0872609	0.286984	0.304062	0.76108	1
ENSG00000075336	TIMM21	1416.03	0.0378492	0.420075	0.090101	0.928207	1
ENSG00000075340	ADD2	1011.17	0.0463943	0.624929	0.0742393	0.94082	1
ENSG00000075391	RASAL2	34.6876	1.22697	0.914131	1.34222	0.179523	1
ENSG00000075399	VPS9D1	894.712	-0.118934	0.275181	-0.432205	0.665592	1
ENSG00000075407	ZNF37A	1427.44	0.0671365	0.396632	0.169266	0.865587	1
ENSG00000075413	MARK3	4640.13	-0.0173401	0.225016	-0.0770615	0.938575	1
ENSG00000075415	SLC25A3	20943.1	0.0203262	0.461725	0.0440224	0.964887	1
ENSG00000075420	FNDC3B	730.537	0.284002	0.328122	0.865539	0.386743	1
ENSG00000075426	FOSL2	5322.95	0.168639	0.8641	0.195161	0.845267	1
ENSG00000075461	CACNG4	2.16645	0.437288	1.30721	0.334519	0.737988	1
ENSG00000075539	FRYL	4124.22	0.137212	0.404303	0.33938	0.734323	1
ENSG00000075568	TMEM131	2829.31	0.0763106	0.320666	0.237975	0.8119	1
ENSG00000075618	FSCN1	3324.33	0.314554	0.755475	0.416367	0.677142	1
ENSG00000075624	ACTB	388343	-0.0488518	0.586139	-0.083345	0.933577	1
ENSG00000075643	MOCOS	51.0406	0.397766	0.457386	0.869652	0.384491	1
ENSG00000075651	PLD1	73.6658	-0.717068	0.524475	-1.36721	0.171559	1
ENSG00000075673	ATP12A	19.2402	-0.62885	1.12612	-0.558421	0.576557	1
ENSG00000075702	WDR62	575.289	-0.121713	0.713917	-0.170487	0.864627	1
ENSG00000075711	DLG1	2307.62	0.0818455	0.346334	0.23632	0.813185	1
ENSG00000075785	RAB7A	11123.4	-0.026943	0.32889	-0.0819212	0.934709	1
ENSG00000075790	BCAP29	907.666	0.133394	0.520888	0.256089	0.797882	1
ENSG00000075826	SEC31B	1670.96	0.133632	0.466382	0.286529	0.774473	1
ENSG00000075856	SART3	5010.48	0.0914138	0.269146	0.339644	0.734125	1
ENSG00000075884	ARHGAP15	3893.91	0.0649586	0.407847	0.159272	0.873455	1
ENSG00000075886	TUBA3D	108.453	-0.291524	0.367665	-0.792908	0.427831	1
ENSG00000075891	PAX2	1.40297	0	3.12614	0	1	1
ENSG00000075914	EXOSC7	2019.94	-0.219293	0.357668	-0.613117	0.539799	1
ENSG00000075945	KIFAP3	1173.1	-0.0218106	0.219238	-0.0994838	0.920754	1
ENSG00000075975	MKRN2	2077.06	0.0789978	0.157	0.503171	0.614844	1
ENSG00000076003	MCM6	6572.65	0.165786	0.626736	0.264522	0.791377	1
ENSG00000076043	REXO2	1936.65	-0.0820562	0.172245	-0.476392	0.633795	1
ENSG00000076053	RBM7	2204.32	-0.0244013	0.354337	-0.0688645	0.945097	1
ENSG00000076067	RBMS2	350.949	-0.729135	0.412852	-1.76609	0.0773806	1
ENSG00000076108	BAZ2A	6871.02	0.227879	0.247116	0.922153	0.356449	1
ENSG00000076201	PTPN23	2504.77	0.0837164	0.331212	0.252758	0.800455	1
ENSG00000076242	MLH1	2489.87	0.00087626	0.376375	0.00232815	0.998142	1
ENSG00000076248	UNG	2710.83	0.0855966	0.59574	0.143681	0.885752	1
ENSG00000076258	FMO4	139.521	-0.373769	0.401907	-0.929988	0.352377	1
ENSG00000076321	KLHL20	1012.61	0.0560554	0.390515	0.143542	0.885862	1
ENSG00000076344	RGS11	9.00634	0.886557	0.760474	1.1658	0.243697	1
ENSG00000076351	SLC46A1	445.539	0.318362	0.29897	1.06486	0.286938	1
ENSG00000076356	PLXNA2	51.9361	0.0521332	0.759586	0.0686337	0.945281	1
ENSG00000076382	SPAG5	1328.5	0.200948	0.647372	0.310406	0.756252	1
ENSG00000076513	ANKRD13A	4118.29	0.0612188	0.211666	0.289224	0.77241	1
ENSG00000076554	TPD52	1277.73	-0.228633	0.343186	-0.666208	0.505278	1
ENSG00000076555	ACACB	1048.34	-0.0295411	0.305421	-0.0967225	0.922947	1
ENSG00000076604	TRAF4	3357.37	0.35408	0.688982	0.513917	0.60731	1
ENSG00000076641	PAG1	7059.07	0.12856	0.406569	0.316207	0.751846	1
ENSG00000076650	GPATCH1	1007.96	0.320668	0.171777	1.86677	0.0619338	1
ENSG00000076662	ICAM3	10577.2	-0.120985	0.403215	-0.300051	0.764138	1
ENSG00000076685	NT5C2	2855.72	0.134242	0.24483	0.548308	0.58348	1
ENSG00000076706	MCAM	135.912	-0.158372	0.633552	-0.249974	0.802607	1
ENSG00000076716	GPC4	6.07568	-0.635631	0.801548	-0.793005	0.427775	1
ENSG00000076770	MBNL3	1369.95	0.247003	0.358069	0.689821	0.490307	1
ENSG00000076826	CAMSAP3	56.5181	-0.142401	0.751615	-0.18946	0.849732	1
ENSG00000076864	RAP1GAP	24.0876	1.56157	0.844911	1.8482	0.064573	1
ENSG00000076924	XAB2	6944.69	0.00485686	0.347971	0.0139577	0.988864	1
ENSG00000076928	ARHGEF1	27890.1	0.038902	0.301247	0.129136	0.89725	1
ENSG00000076944	STXBP2	4996.27	-0.0727042	0.369217	-0.196915	0.843894	1
ENSG00000076984	MAP2K7	4126.91	-0.0340674	0.277656	-0.122696	0.902347	1
ENSG00000077044	DGKD	6212.8	0.125328	0.434974	0.288127	0.773249	1
ENSG00000077063	CTTNBP2	19.4444	-1.20079	1.21575	-0.987692	0.323304	1
ENSG00000077092	RARB	16.3592	0.0222344	0.657568	0.0338131	0.973026	1
ENSG00000077097	TOP2B	8078.62	0.0486588	0.533759	0.0911624	0.927364	1
ENSG00000077147	TM9SF3	7225.92	0.0456303	0.436742	0.104479	0.916789	1
ENSG00000077150	NFKB2	14085.8	0.832415	0.481677	1.72816	0.0839593	1
ENSG00000077152	UBE2T	1316	-0.284305	0.800925	-0.354971	0.722612	1
ENSG00000077157	PPP1R12B	816.242	0.0822355	0.380735	0.215991	0.828994	1
ENSG00000077232	DNAJC10	3296.66	0.377213	0.481533	0.783358	0.433417	1
ENSG00000077235	GTF3C1	3704.64	-0.168646	0.311048	-0.542187	0.58769	1
ENSG00000077238	IL4R	14386	0.0610341	0.448396	0.136116	0.891729	1
ENSG00000077254	USP33	3698.04	-0.00383309	0.417944	-0.00917129	0.992682	1
ENSG00000077264	PAK3	44.1847	1.29051	0.413675	3.11964	0.00181074	1
ENSG00000077279	DCX	3.64189	-0.548513	1.21015	-0.453261	0.650361	1
ENSG00000077312	SNRPA	5545.72	-0.209289	0.573967	-0.364635	0.715384	1
ENSG00000077327	SPAG6	3.77691	-1.08349	1.53194	-0.707266	0.479401	1
ENSG00000077348	EXOSC5	1997.29	-0.0301992	0.438344	-0.0688937	0.945074	1
ENSG00000077380	DYNC1I2	3341.98	0.0556087	0.250636	0.22187	0.824415	1
ENSG00000077420	APBB1IP	5122.42	-0.0279415	0.19738	-0.141562	0.887426	1
ENSG00000077454	LRCH4	6711.64	0.0267024	0.361134	0.0739406	0.941058	1
ENSG00000077458	FAM76B	1833.53	0.0339463	0.592504	0.0572929	0.954312	1
ENSG00000077463	SIRT6	1406.77	0.0475962	0.418774	0.113656	0.90951	1
ENSG00000077498	TYR	4.11983	-0.0817003	1.13112	-0.0722295	0.942419	1
ENSG00000077514	POLD3	1444.04	0.00218135	0.563109	0.00387376	0.996909	1
ENSG00000077522	ACTN2	5.81736	-0.0940959	1.30743	-0.0719699	0.942626	1
ENSG00000077549	CAPZB	15465.1	-0.0787728	0.353755	-0.222676	0.823787	1
ENSG00000077585	GPR137B	526.17	0.174791	0.267577	0.653237	0.513603	1
ENSG00000077616	NAALAD2	71.523	0.0599595	0.52583	0.114028	0.909215	1
ENSG00000077684	JADE1	4156.13	-0.0207427	0.218817	-0.0947949	0.924478	1
ENSG00000077713	SLC25A43	254.217	0.39128	0.369908	1.05778	0.290158	1
ENSG00000077721	UBE2A	2689.58	-0.0347785	0.331795	-0.104819	0.916519	1
ENSG00000077782	FGFR1	405.089	-0.428524	0.337808	-1.26854	0.204605	1
ENSG00000077800	FKBP6	46.7455	-0.125168	0.751005	-0.166667	0.867632	1
ENSG00000077935	SMC1B	77.6441	0.643648	0.375545	1.7139	0.0865468	1
ENSG00000077942	FBLN1	50.2924	0.512489	0.320792	1.59757	0.110138	1
ENSG00000077943	ITGA8	13.4311	-0.872549	0.752638	-1.15932	0.246325	1
ENSG00000077984	CST7	747.844	0.0337025	0.542064	0.0621745	0.950424	1
ENSG00000078018	MAP2	23.5944	0.148363	0.83048	0.178647	0.858215	1
ENSG00000078043	PIAS2	1669.79	0.325567	0.376903	0.863795	0.387701	1
ENSG00000078053	AMPH	36.9846	-0.758282	0.515945	-1.4697	0.141644	1
ENSG00000078061	ARAF	5633.37	-0.115344	0.383642	-0.300655	0.763678	1
ENSG00000078070	MCCC1	1140.91	-0.198249	0.174053	-1.13901	0.254699	1
ENSG00000078081	LAMP3	1320.91	0.189862	0.584097	0.325051	0.745142	1
ENSG00000078098	FAP	4.62523	1.29645	1.03651	1.25078	0.211015	1
ENSG00000078114	NEBL	50.0931	1.28088	0.88476	1.44771	0.147697	1
ENSG00000078124	ACER3	675.167	-0.0581353	0.371074	-0.156668	0.875507	1
ENSG00000078140	UBE2K	4435.74	-0.0945806	0.364156	-0.259726	0.795075	1
ENSG00000078142	PIK3C3	2014.85	0.101776	0.252682	0.402783	0.687108	1
ENSG00000078177	N4BP2	812.187	0.00937167	0.712943	0.0131451	0.989512	1
ENSG00000078237	TIGAR	554.319	-0.438872	0.614698	-0.713963	0.47525	1
ENSG00000078246	TULP3	490.266	0.193702	0.244292	0.792911	0.42783	1
ENSG00000078269	SYNJ2	3187	0.0696563	0.523278	0.133115	0.894102	1
ENSG00000078295	ADCY2	35.984	0.175924	0.53435	0.329231	0.741981	1
ENSG00000078304	PPP2R5C	10361.6	0.0753799	0.162408	0.464139	0.642548	1
ENSG00000078319	PMS2P1	664.183	0.0544271	0.38017	0.143165	0.88616	1
ENSG00000078328	RBFOX1	5.18379	0.082535	0.926874	0.0890467	0.929045	1
ENSG00000078369	GNB1	18210.6	0.0778905	0.370634	0.210155	0.833547	1
ENSG00000078399	HOXA9	88.9316	-0.324279	0.558535	-0.580588	0.561518	1
ENSG00000078401	EDN1	40.3822	0.0119437	0.5948	0.0200802	0.983979	1
ENSG00000078403	MLLT10	2176.52	0.150415	0.244499	0.615197	0.538425	1
ENSG00000078487	ZCWPW1	622.514	0.121269	0.437977	0.276884	0.781869	1
ENSG00000078579	FGF20	1.87724	-4.39922	2.63735	-1.66804	0.0953072	1
ENSG00000078589	P2RY10	1524.17	0.147086	0.335965	0.437802	0.66153	1
ENSG00000078596	ITM2A	6168.66	-0.0175373	0.15355	-0.114212	0.909069	1
ENSG00000078618	NRDC	5604.03	0.0656815	0.200865	0.326993	0.743673	1
ENSG00000078668	VDAC3	5247.51	-0.0050187	0.324532	-0.0154644	0.987662	1
ENSG00000078674	PCM1	5354.99	0.118163	0.586232	0.201563	0.840258	1
ENSG00000078687	TNRC6C	4100.77	0.0603662	0.329548	0.183179	0.854658	1
ENSG00000078699	CBFA2T2	2639.3	0.0343612	0.356798	0.0963042	0.923279	1
ENSG00000078747	ITCH	2904.55	0.117002	0.216622	0.540119	0.589115	1
ENSG00000078795	PKD2L2	40.3526	0.462848	0.466974	0.991165	0.321605	1
ENSG00000078804	TP53INP2	150.685	0.00434049	0.516078	0.00841054	0.993289	1
ENSG00000078808	SDF4	11081.5	0.0284386	0.403923	0.0704061	0.94387	1
ENSG00000078814	MYH7B	169.678	-0.100038	0.4025	-0.248541	0.803716	1
ENSG00000078900	TP73	123.575	-0.0914088	0.828712	-0.110302	0.91217	1
ENSG00000078902	TOLLIP	3608.64	0.0960682	0.396847	0.242079	0.808719	1
ENSG00000078967	UBE2D4	879.568	-0.191193	0.294553	-0.649095	0.516277	1
ENSG00000079101	CLUL1	8.75253	-0.979854	0.878376	-1.11553	0.264624	1
ENSG00000079102	RUNX1T1	3.37477	2.51463	1.70079	1.4785	0.139273	1
ENSG00000079112	CDH17	11.5485	0.0901651	0.811783	0.111071	0.91156	1
ENSG00000079134	THOC1	2450.21	0.179418	0.435464	0.412017	0.680327	1
ENSG00000079150	FKBP7	102.425	0.0308686	0.479957	0.0643154	0.948719	1
ENSG00000079156	OSBPL6	96.8042	-0.0981145	0.299944	-0.327109	0.743585	1
ENSG00000079215	SLC1A3	17.5831	1.37326	0.8145	1.68601	0.0917931	1
ENSG00000079246	XRCC5	21268.9	0.0230372	0.442363	0.0520775	0.958467	1
ENSG00000079257	LXN	305.361	-0.0602938	0.390087	-0.154565	0.877164	1
ENSG00000079263	SP140	2297.19	0.0126119	0.267137	0.0472114	0.962345	1
ENSG00000079277	MKNK1	1737.84	-0.120369	0.173304	-0.694556	0.487333	1
ENSG00000079308	TNS1	42.6936	-0.0819059	1.11385	-0.0735341	0.941381	1
ENSG00000079313	REXO1	4457.75	0.0136315	0.239592	0.0568944	0.954629	1
ENSG00000079332	SAR1A	6159.04	0.0260031	0.224793	0.115676	0.907909	1
ENSG00000079335	CDC14A	2161.86	0.167672	0.62467	0.268416	0.788379	1
ENSG00000079337	RAPGEF3	88.8666	0.207481	0.533509	0.388898	0.697351	1
ENSG00000079385	CEACAM1	793.614	-0.161334	0.293707	-0.549304	0.582797	1
ENSG00000079387	SENP1	1580.26	0.102924	0.399324	0.257747	0.796602	1
ENSG00000079393	DUSP13	0.913688	1.48557	3.62589	0.409713	0.682017	1
ENSG00000079432	CIC	4904.28	-0.0939328	0.301341	-0.311716	0.755256	1
ENSG00000079435	LIPE	1100.59	-0.120867	0.447925	-0.269838	0.787285	1
ENSG00000079459	FDFT1	8109.38	-0.105928	0.373487	-0.28362	0.776702	1
ENSG00000079462	PAFAH1B3	1548.69	-0.0973253	0.571292	-0.17036	0.864727	1
ENSG00000079482	OPHN1	586.026	-0.389239	0.473739	-0.821632	0.411286	1
ENSG00000079616	KIF22	5410.85	-0.0644952	0.466114	-0.138368	0.88995	1
ENSG00000079691	CARMIL1	480.338	-0.122609	0.357677	-0.342791	0.731756	1
ENSG00000079739	PGM1	1681.96	0.0117522	0.465809	0.0252296	0.979872	1
ENSG00000079785	DDX1	4090.04	-0.0534811	0.354109	-0.15103	0.879952	1
ENSG00000079805	DNM2	13388.3	0.0215564	0.296127	0.0727944	0.94197	1
ENSG00000079819	EPB41L2	986.282	0.213619	0.404255	0.528426	0.597204	1
ENSG00000079841	RIMS1	5.2252	-0.0600727	1.01044	-0.0594518	0.952592	1
ENSG00000079931	MOXD1	5.35198	1.71205	1.32645	1.2907	0.196808	1
ENSG00000079950	STX7	1340.64	0.203426	0.339608	0.599003	0.549171	1
ENSG00000079974	RABL2B	2231.3	-0.0513836	0.229493	-0.223901	0.822835	1
ENSG00000079999	KEAP1	4234.2	-0.131143	0.484588	-0.270628	0.786677	1
ENSG00000080007	DDX43	48.7548	0.399378	0.525219	0.760403	0.447014	1
ENSG00000080031	PTPRH	12.5119	-0.0833686	0.756835	-0.110154	0.912287	1
ENSG00000080166	DCT	95.9296	0.418064	1.30252	0.320966	0.748236	1
ENSG00000080189	SLC35C2	4382.49	0.0698202	0.259902	0.268641	0.788206	1
ENSG00000080200	CRYBG3	150.27	0.211753	0.91062	0.232538	0.81612	1
ENSG00000080224	EPHA6	0.707114	-2.86758	6.28772	-0.456061	0.648346	1
ENSG00000080293	SCTR	2.94143	0.188793	1.4387	0.131225	0.895598	1
ENSG00000080298	RFX3	820.974	0.160827	0.287234	0.559917	0.575536	1
ENSG00000080345	RIF1	3986.42	0.171445	0.63115	0.271639	0.7859	1
ENSG00000080371	RAB21	4148.89	0.0621508	0.341046	0.182236	0.855398	1
ENSG00000080493	SLC4A4	20.4952	0.425722	0.686303	0.620312	0.535052	1
ENSG00000080503	SMARCA2	6725.39	0.0718702	0.334609	0.214789	0.829932	1
ENSG00000080511	RDH8	5.01411	-0.138771	0.991	-0.140031	0.888636	1
ENSG00000080546	SESN1	2294.39	0.0630253	0.482983	0.130492	0.896177	1
ENSG00000080561	MID2	266.549	0.324901	0.404109	0.803993	0.421401	1
ENSG00000080572	PIH1D3	1.98493	-0.760618	1.7633	-0.43136	0.666207	1
ENSG00000080573	COL5A3	56.6723	0.537998	0.735941	0.731034	0.464758	1
ENSG00000080603	SRCAP	4889.2	0.477534	0.499948	0.955167	0.339493	1
ENSG00000080608	PUM3	2933.43	0.0963046	0.603315	0.159626	0.873176	1
ENSG00000080618	CPB2	2.69477	0.371878	1.27911	0.290731	0.771257	1
ENSG00000080644	CHRNA3	9.23095	1.39517	1.29441	1.07784	0.281104	1
ENSG00000080709	KCNN2	4.26004	0.111844	1.46667	0.0762569	0.939215	1
ENSG00000080802	CNOT4	1100.13	0.157192	0.188511	0.833862	0.404359	1
ENSG00000080815	PSEN1	2424.58	0.0636207	0.250073	0.254408	0.79918	1
ENSG00000080819	CPOX	2247.31	-0.112728	0.403156	-0.279613	0.779774	1
ENSG00000080822	CLDND1	6065.65	0.174844	0.298999	0.584764	0.558707	1
ENSG00000080823	MOK	209.951	-0.247636	0.485413	-0.510156	0.609943	1
ENSG00000080824	HSP90AA1	65085.7	-0.0338312	0.711138	-0.0475734	0.962056	1
ENSG00000080839	RBL1	1334.75	0.0980568	0.510294	0.192157	0.847619	1
ENSG00000080845	DLGAP4	2380.82	0.0426381	0.343533	0.124116	0.901223	1
ENSG00000080854	IGSF9B	284.251	0.292729	0.437597	0.668948	0.503529	1
ENSG00000080910	CFHR2	4.09236	0.204977	1.22405	0.167458	0.867009	1
ENSG00000080947	CROCCP3	446.19	-0.117313	0.575684	-0.203781	0.838525	1
ENSG00000080986	NDC80	672.881	0.048111	0.774638	0.0621077	0.950477	1
ENSG00000081014	AP4E1	930.072	0.0570174	0.355258	0.160496	0.872491	1
ENSG00000081019	RSBN1	3153.32	0.238916	0.233226	1.02439	0.305649	1
ENSG00000081026	MAGI3	284.676	-0.0778306	0.503631	-0.154539	0.877185	1
ENSG00000081041	CXCL2	14.924	1.75237	0.615275	2.84811	0.004398	1
ENSG00000081052	COL4A4	38.7517	0.237633	0.433087	0.548695	0.583215	1
ENSG00000081059	TCF7	32860.9	0.0772708	0.388001	0.199151	0.842145	1
ENSG00000081087	OSTM1	2341.95	0.0139775	0.427062	0.0327294	0.97389	1
ENSG00000081138	CDH7	10.8113	0.668769	0.658081	1.01624	0.309514	1
ENSG00000081148	IMPG2	84.7897	0.194531	0.765366	0.254167	0.799367	1
ENSG00000081154	PCNP	8549.66	-0.0156701	0.336204	-0.0466089	0.962825	1
ENSG00000081177	EXD2	643.264	0.198545	0.276811	0.717259	0.473214	1
ENSG00000081181	ARG2	143.525	-0.209592	0.638449	-0.328284	0.742697	1
ENSG00000081189	MEF2C	146.066	-0.228983	0.732806	-0.312474	0.75468	1
ENSG00000081237	PTPRC	42084.4	0.158747	0.431845	0.367601	0.713171	1
ENSG00000081307	UBA5	2203.26	-0.0958214	0.403452	-0.237504	0.812266	1
ENSG00000081320	STK17B	18450	0.0365974	0.36933	0.0990915	0.921066	1
ENSG00000081377	CDC14B	468.313	-0.153496	0.682376	-0.224943	0.822024	1
ENSG00000081386	ZNF510	710.665	0.00954007	0.54283	0.0175747	0.985978	1
ENSG00000081479	LRP2	23.4064	-0.407937	0.579594	-0.703832	0.481537	1
ENSG00000081665	ZNF506	2187.87	-0.198272	0.389452	-0.509106	0.610678	1
ENSG00000081692	JMJD4	1739.9	-0.112594	0.463831	-0.242748	0.808201	1
ENSG00000081721	DUSP12	1147.72	-0.0551101	0.168321	-0.327412	0.743357	1
ENSG00000081760	AACS	1088	-0.0719283	0.239735	-0.300032	0.764152	1
ENSG00000081791	DELE1	2649.32	0.0356431	0.267442	0.133274	0.893977	1
ENSG00000081800	SLC13A1	2.00177	0.23985	1.43912	0.166665	0.867634	1
ENSG00000081803	CADPS2	2.09229	-3.34963	2.33488	-1.4346	0.1514	1
ENSG00000081818	PCDHB4	2.49949	-0.185164	1.43681	-0.128871	0.89746	1
ENSG00000081853	PCDHGA2	1.84317	3.84151	2.13531	1.79904	0.0720119	1
ENSG00000081870	HSPB11	1447.23	0.00422881	0.35305	0.0119779	0.990443	1
ENSG00000081913	PHLPP1	405.041	0.0683693	0.355333	0.192409	0.847422	1
ENSG00000081923	ATP8B1	143.617	0.368803	0.405778	0.908879	0.363414	1
ENSG00000081985	IL12RB2	3184.26	0.317011	1.24923	0.253766	0.799677	1
ENSG00000082014	SMARCD3	452.786	-0.132141	0.363685	-0.363339	0.716352	1
ENSG00000082068	WDR70	1443.07	-0.252497	0.211098	-1.19611	0.231653	1
ENSG00000082074	FYB1	23125.6	-0.0540604	0.616178	-0.0877351	0.930087	1
ENSG00000082126	MPP4	14.0193	-0.0509909	0.666122	-0.0765489	0.938982	1
ENSG00000082146	STRADB	972.474	-0.168916	0.203918	-0.828355	0.40747	1
ENSG00000082153	BZW1	16358.7	0.202966	0.658477	0.308236	0.757903	1
ENSG00000082196	C1QTNF3	198.895	-0.0972833	0.634201	-0.153395	0.878087	1
ENSG00000082212	ME2	5422.85	0.158769	0.355638	0.446434	0.655283	1
ENSG00000082213	C5orf22	1239.85	0.0457148	0.33737	0.135503	0.892214	1
ENSG00000082258	CCNT2	3200.88	0.073774	0.586839	0.125714	0.899958	1
ENSG00000082269	FAM135A	328.903	-0.153246	0.421968	-0.363169	0.716478	1
ENSG00000082293	COL19A1	27.8786	0.347258	0.652404	0.532274	0.594537	1
ENSG00000082397	EPB41L3	391.143	0.0795299	0.396876	0.20039	0.841176	1
ENSG00000082438	COBLL1	32.9914	0.261461	0.821082	0.318435	0.750155	1
ENSG00000082458	DLG3	628.012	0.0824335	0.330802	0.249193	0.803212	1
ENSG00000082482	KCNK2	1.86805	-1.10446	2.11899	-0.521219	0.602214	1
ENSG00000082512	TRAF5	3068.5	0.10519	0.395938	0.265672	0.790492	1
ENSG00000082515	MRPL22	1502.73	0.0810266	0.448444	0.180684	0.856616	1
ENSG00000082516	GEMIN5	2018.55	0.373082	0.443973	0.840326	0.400725	1
ENSG00000082556	OPRK1	2.72284	-0.490175	1.12096	-0.437282	0.661907	1
ENSG00000082641	NFE2L1	5535.46	0.129742	0.330996	0.391974	0.695077	1
ENSG00000082684	SEMA5B	12.3393	-0.104493	0.642725	-0.162579	0.87085	1
ENSG00000082701	GSK3B	2217.68	0.0212943	0.376066	0.0566238	0.954845	1
ENSG00000082781	ITGB5	37.2757	-0.742581	0.779397	-0.952764	0.34071	1
ENSG00000082805	ERC1	1132.23	0.078768	0.306154	0.257282	0.796961	1
ENSG00000082898	XPO1	9693.54	0.0513227	0.418731	0.122567	0.90245	1
ENSG00000082996	RNF13	1468.33	-0.0424678	0.391743	-0.108407	0.913673	1
ENSG00000083067	TRPM3	16.7328	0.421366	0.578245	0.728697	0.466187	1
ENSG00000083093	PALB2	733.3	0.0730125	0.43154	0.169191	0.865647	1
ENSG00000083097	DOP1A	997.647	0.095823	0.597015	0.160503	0.872485	1
ENSG00000083099	LYRM2	1755.86	0.035526	0.425228	0.0835457	0.933418	1
ENSG00000083123	BCKDHB	731.266	-0.188137	0.36267	-0.518754	0.603932	1
ENSG00000083168	KAT6A	7259.21	0.165322	0.29925	0.552455	0.580637	1
ENSG00000083223	TUT7	1585.13	0.0648938	0.486103	0.133498	0.8938	1
ENSG00000083290	ULK2	848.568	-0.0531659	0.286104	-0.185827	0.85258	1
ENSG00000083307	GRHL2	3.00968	0.123333	1.23407	0.0999407	0.920391	1
ENSG00000083312	TNPO1	6117.1	0.252498	0.465704	0.542186	0.58769	1
ENSG00000083444	PLOD1	422.939	-0.190984	0.70035	-0.272698	0.785086	1
ENSG00000083454	P2RX5	1716.12	-0.160425	0.7529	-0.213076	0.831268	1
ENSG00000083457	ITGAE	1182.78	0.0414227	0.332388	0.124622	0.900823	1
ENSG00000083520	DIS3	3510.73	0.168437	0.556536	0.302653	0.762154	1
ENSG00000083535	PIBF1	708.671	0.187872	0.710125	0.264561	0.791347	1
ENSG00000083544	TDRD3	951.801	0.0792627	0.355167	0.22317	0.823403	1
ENSG00000083635	NUFIP1	690.789	0.105591	0.409943	0.257574	0.796736	1
ENSG00000083642	PDS5B	2195.82	-0.00556676	0.518179	-0.0107429	0.991429	1
ENSG00000083720	OXCT1	2832.59	0.0201403	0.549057	0.0366817	0.970739	1
ENSG00000083750	RRAGB	498.574	0.203052	0.505821	0.40143	0.688104	1
ENSG00000083799	CYLD	19181.3	0.230613	0.242813	0.949755	0.342237	1
ENSG00000083807	SLC27A5	558.63	-0.0140278	0.444559	-0.0315544	0.974827	1
ENSG00000083812	ZNF324	1045.38	0.0581115	0.338862	0.17149	0.863838	1
ENSG00000083814	ZNF671	1314.73	0.0564563	0.33807	0.166996	0.867373	1
ENSG00000083817	ZNF416	407.845	-0.0115917	0.344422	-0.0336555	0.973152	1
ENSG00000083828	ZNF586	1114.74	0.0689817	0.265421	0.259896	0.794944	1
ENSG00000083838	ZNF446	667.646	-0.17622	0.280926	-0.627282	0.530474	1
ENSG00000083844	ZNF264	2429.04	0.2288	0.234819	0.974369	0.329873	1
ENSG00000083845	RPS5	81304.1	-0.051885	0.442244	-0.117322	0.906605	1
ENSG00000083857	FAT1	14.7692	0.204567	0.712795	0.286992	0.774118	1
ENSG00000083896	YTHDC1	7993.17	0.0328822	0.402776	0.0816389	0.934934	1
ENSG00000083937	CHMP2B	1829.09	0.0699878	0.316071	0.221431	0.824757	1
ENSG00000084070	SMAP2	11910	0.0161322	0.408833	0.0394591	0.968524	1
ENSG00000084072	PPIE	2924.38	-0.0515739	0.28023	-0.184041	0.853981	1
ENSG00000084073	ZMPSTE24	2232.86	0.0547458	0.433984	0.126147	0.899615	1
ENSG00000084090	STARD7	8787.8	0.00746565	0.451654	0.0165296	0.986812	1
ENSG00000084092	NOA1	2567.92	0.0446063	0.151619	0.294201	0.768605	1
ENSG00000084093	REST	3268.25	-0.055085	0.441212	-0.124849	0.900643	1
ENSG00000084110	HAL	48.6151	0.801073	0.887918	0.902192	0.366955	1
ENSG00000084112	SSH1	2319.86	0.260024	0.254293	1.02254	0.306528	1
ENSG00000084207	GSTP1	8915.17	-0.0331924	0.568783	-0.0583569	0.953464	1
ENSG00000084234	APLP2	4101.17	-0.0530681	0.252396	-0.210257	0.833467	1
ENSG00000084444	FAM234B	392.549	0.0661114	0.261722	0.252601	0.800576	1
ENSG00000084453	SLCO1A2	9.77045	0.631465	0.796696	0.792605	0.428008	1
ENSG00000084463	WBP11	6455.54	0.0842948	0.384799	0.219062	0.826602	1
ENSG00000084623	EIF3I	11480.2	-0.0170343	0.549619	-0.0309929	0.975275	1
ENSG00000084628	NKAIN1	1.35172	0	3.43162	0	1	1
ENSG00000084636	COL16A1	13.2589	-0.0241474	0.803486	-0.0300533	0.976025	1
ENSG00000084652	TXLNA	5853.81	0.0237625	0.424478	0.0559805	0.955357	1
ENSG00000084674	APOB	2.20065	-1.65768	1.73222	-0.95697	0.338582	1
ENSG00000084676	NCOA1	2654.18	0.192177	0.219395	0.87594	0.381063	1
ENSG00000084693	AGBL5	958.925	0.110025	0.265309	0.414707	0.678357	1
ENSG00000084710	EFR3B	118.791	-0.100005	0.349832	-0.285866	0.774981	1
ENSG00000084731	KIF3C	249.173	-0.2977	0.518662	-0.573977	0.565983	1
ENSG00000084733	RAB10	5895.85	0.165778	0.3742	0.443019	0.657752	1
ENSG00000084734	GCKR	16.7544	0.221369	0.453434	0.488205	0.625404	1
ENSG00000084754	HADHA	10369.5	-0.0403479	0.337234	-0.119643	0.904766	1
ENSG00000084764	MAPRE3	212.125	0.218275	0.284051	0.768437	0.442228	1
ENSG00000084774	CAD	6255.66	-0.0369775	0.509591	-0.0725631	0.942154	1
ENSG00000085063	CD59	3191.08	0.114422	0.410337	0.278848	0.780362	1
ENSG00000085117	CD82	5395.59	0.114729	0.538019	0.213243	0.831138	1
ENSG00000085185	BCORL1	624.648	0.162606	0.398124	0.408429	0.682958	1
ENSG00000085224	ATRX	4762.73	0.199825	0.574649	0.347735	0.728039	1
ENSG00000085231	AK6	1277.68	0.00340196	0.476832	0.00713452	0.994308	1
ENSG00000085265	FCN1	77.569	0.288016	0.758527	0.379704	0.704165	1
ENSG00000085274	MYNN	1268.79	0.0397048	0.474914	0.0836043	0.933371	1
ENSG00000085276	MECOM	23.3502	0.0209871	0.73886	0.0284047	0.977339	1
ENSG00000085365	SCAMP1	873.956	0.0375612	0.416112	0.090267	0.928075	1
ENSG00000085377	PREP	2470.99	0.029698	0.286134	0.10379	0.917336	1
ENSG00000085382	HACE1	744.574	-0.127726	0.404852	-0.315487	0.752392	1
ENSG00000085415	SEH1L	3712.36	0.0815667	0.539249	0.15126	0.879771	1
ENSG00000085433	WDR47	618.504	-0.245601	0.258319	-0.950765	0.341724	1
ENSG00000085449	WDFY1	2379.81	0.054707	0.34642	0.157921	0.874519	1
ENSG00000085465	OVGP1	378.053	0.190724	0.859996	0.221773	0.82449	1
ENSG00000085491	SLC25A24	746.976	-0.0157108	0.543361	-0.0289142	0.976933	1
ENSG00000085511	MAP3K4	2012.17	-0.121623	0.248028	-0.490361	0.623879	1
ENSG00000085514	PILRA	175.01	-0.226507	0.641209	-0.35325	0.723901	1
ENSG00000085552	IGSF9	4.31106	0.113015	0.897889	0.125867	0.899837	1
ENSG00000085563	ABCB1	1132.76	-0.016861	0.390765	-0.0431488	0.965583	1
ENSG00000085644	ZNF213	1354.43	0.0201732	0.342173	0.0589561	0.952987	1
ENSG00000085662	AKR1B1	5196.14	-0.068727	0.300982	-0.228342	0.81938	1
ENSG00000085719	CPNE3	2918.31	-0.0734425	0.297942	-0.246499	0.805296	1
ENSG00000085721	RRN3	3392.01	0.0560097	0.314854	0.177891	0.858809	1
ENSG00000085733	CTTN	356.134	-0.0282206	0.869271	-0.0324647	0.974101	1
ENSG00000085741	WNT11	19.6135	-0.387217	0.74355	-0.520767	0.602529	1
ENSG00000085760	MTIF2	1762.4	0.036936	0.438031	0.0843227	0.9328	1
ENSG00000085788	DDHD2	2265.81	0.105939	0.20981	0.504927	0.61361	1
ENSG00000085831	TTC39A	26.986	-0.311247	0.82564	-0.376977	0.706191	1
ENSG00000085832	EPS15	2925.25	-0.0531585	0.466354	-0.113987	0.909248	1
ENSG00000085840	ORC1	1115.77	0.0468859	0.964968	0.048588	0.961248	1
ENSG00000085871	MGST2	247.981	-0.116438	0.487201	-0.238994	0.81111	1
ENSG00000085872	CHERP	5388.66	-0.032788	0.251664	-0.130285	0.896341	1
ENSG00000085978	ATG16L1	2878.7	-0.031363	0.259726	-0.120754	0.903886	1
ENSG00000085982	USP40	855.428	-0.0316319	0.267545	-0.11823	0.905885	1
ENSG00000085998	POMGNT1	2401.14	-0.0562259	0.424474	-0.13246	0.89462	1
ENSG00000085999	RAD54L	730.945	0.964299	0.936637	1.02953	0.303229	1
ENSG00000086015	MAST2	989.458	0.353972	0.65125	0.543527	0.586767	1
ENSG00000086061	DNAJA1	10840.4	0.0961608	0.588039	0.163528	0.870103	1
ENSG00000086062	B4GALT1	3595.34	0.0321768	0.306633	0.104936	0.916427	1
ENSG00000086065	CHMP5	2647.84	-0.0797194	0.402188	-0.198214	0.842877	1
ENSG00000086102	NFX1	3859.43	0.0341409	0.191912	0.177898	0.858803	1
ENSG00000086159	AQP6	4.17617	-0.132826	1.37238	-0.0967854	0.922897	1
ENSG00000086189	DIMT1	4011.3	-0.0375707	0.272317	-0.137967	0.890266	1
ENSG00000086200	IPO11	1185.82	-0.0697988	0.445385	-0.156716	0.875469	1
ENSG00000086205	FOLH1	13.6494	0.125353	0.736971	0.170092	0.864938	1
ENSG00000086232	EIF2AK1	5527.87	0.154833	0.356063	0.434849	0.663672	1
ENSG00000086288	NME8	8.61343	-0.372135	0.984961	-0.377817	0.705567	1
ENSG00000086289	EPDR1	101.997	-0.465441	0.499692	-0.931454	0.351619	1
ENSG00000086300	SNX10	873.625	0.180073	0.562245	0.320274	0.74876	1
ENSG00000086475	SEPHS1	3081.13	0.019183	0.379282	0.0505772	0.959662	1
ENSG00000086504	MRPL28	3676.81	-0.0120691	0.604338	-0.0199708	0.984067	1
ENSG00000086506	HBQ1	7.79463	0.31664	1.0917	0.290044	0.771783	1
ENSG00000086544	ITPKC	833.964	0.198917	0.30187	0.658948	0.509929	1
ENSG00000086548	CEACAM6	7.42734	-2.02476	0.974128	-2.07854	0.0376598	1
ENSG00000086570	FAT2	10.4182	-0.094117	0.893204	-0.10537	0.916082	1
ENSG00000086589	RBM22	4458.09	-0.000384237	0.191695	-0.00200442	0.998401	1
ENSG00000086598	TMED2	7873.9	0.0356184	0.250817	0.142009	0.887073	1
ENSG00000086619	ERO1B	1105.08	0.0592898	0.689249	0.0860208	0.93145	1
ENSG00000086666	ZFAND6	2457.24	0.0662452	0.30032	0.220582	0.825418	1
ENSG00000086696	HSD17B2	93.5143	0.238488	0.423287	0.563419	0.57315	1
ENSG00000086712	TXLNG	2369.41	0.0414742	0.343593	0.120707	0.903923	1
ENSG00000086717	PPEF1	16.5077	0.443432	0.87903	0.504456	0.613941	1
ENSG00000086730	LAT2	863.942	-0.0685946	0.376467	-0.182206	0.855421	1
ENSG00000086758	HUWE1	14387	0.128017	0.467003	0.274124	0.783989	1
ENSG00000086827	ZW10	977.836	-0.00744449	0.394935	-0.0188499	0.984961	1
ENSG00000086848	ALG9	1135.82	0.170465	0.270679	0.629766	0.528848	1
ENSG00000086967	MYBPC2	11.5332	2.76983	1.57187	1.76213	0.0780475	1
ENSG00000086991	NOX4	23.1684	-0.504252	0.517398	-0.974592	0.329762	1
ENSG00000087008	ACOX3	713.075	0.00452983	0.387724	0.0116831	0.990678	1
ENSG00000087053	MTMR2	1291.85	-0.0260337	0.54024	-0.0481892	0.961565	1
ENSG00000087074	PPP1R15A	2386.58	0.175766	0.320629	0.548192	0.58356	1
ENSG00000087076	HSD17B14	42.0709	0.203674	0.464504	0.438477	0.661041	1
ENSG00000087077	TRIP6	1062.5	0.142014	0.554275	0.256215	0.797785	1
ENSG00000087085	ACHE	38.8061	0.944983	0.817074	1.15654	0.247459	1
ENSG00000087086	FTL	61210.7	-0.0762257	0.360313	-0.211554	0.832455	1
ENSG00000087087	SRRT	9400.96	0.0554644	0.378834	0.146408	0.883599	1
ENSG00000087088	BAX	5538.77	-0.174986	0.351371	-0.49801	0.618477	1
ENSG00000087095	NLK	860.319	0.0798971	0.285717	0.279638	0.779755	1
ENSG00000087111	PIGS	2661.62	-0.00423834	0.354215	-0.0119654	0.990453	1
ENSG00000087116	ADAMTS2	14.498	-0.67641	0.560274	-1.20728	0.227323	1
ENSG00000087128	TMPRSS11E	1.91389	-1.83768	1.6476	-1.11537	0.264692	1
ENSG00000087152	ATXN7L3	6139.69	-0.0470477	0.357138	-0.131735	0.895194	1
ENSG00000087157	PGS1	2958.85	0.0919465	0.2119	0.433915	0.66435	1
ENSG00000087191	PSMC5	7919.79	-0.0545629	0.474989	-0.114872	0.908547	1
ENSG00000087206	UIMC1	1768.61	-0.0224688	0.169213	-0.132784	0.894364	1
ENSG00000087237	CETP	367.32	0.598864	0.438578	1.36547	0.172107	1
ENSG00000087245	MMP2	115.32	0.370003	0.599878	0.616797	0.537369	1
ENSG00000087250	MT3	39.4498	0.0521589	1.03512	0.0503892	0.959812	1
ENSG00000087253	LPCAT2	305.57	0.170121	0.417489	0.407486	0.683651	1
ENSG00000087258	GNAO1	109.219	-0.0348951	0.575357	-0.0606495	0.951638	1
ENSG00000087263	OGFOD1	3004.19	0.219922	0.406404	0.541141	0.588411	1
ENSG00000087266	SH3BP2	3211.56	-0.0708253	0.584616	-0.121149	0.903573	1
ENSG00000087269	NOP14	7130.02	0.120234	0.47461	0.253333	0.800011	1
ENSG00000087274	ADD1	10287.4	-0.105176	0.251095	-0.418869	0.675312	1
ENSG00000087299	L2HGDH	911.767	-0.274471	0.515516	-0.53242	0.594435	1
ENSG00000087301	TXNDC16	321.751	-0.247775	0.450063	-0.550534	0.581953	1
ENSG00000087302	RTRAF	5809.58	-0.0553861	0.227756	-0.243182	0.807864	1
ENSG00000087303	NID2	45.8103	-0.169703	0.427579	-0.396892	0.691447	1
ENSG00000087338	GMCL1	2239.31	-0.0200567	0.424398	-0.0472592	0.962307	1
ENSG00000087365	SF3B2	15503.9	0.0191447	0.334123	0.0572983	0.954308	1
ENSG00000087448	KLHL42	1590.04	0.00140942	0.253079	0.00556911	0.995557	1
ENSG00000087460	GNAS	44231	-0.0395108	0.223238	-0.17699	0.859517	1
ENSG00000087470	DNM1L	2296.08	0.0335692	0.477126	0.070357	0.943909	1
ENSG00000087494	PTHLH	5.26671	0.534889	1.26622	0.422429	0.672712	1
ENSG00000087495	PHACTR3	46.0934	-0.131665	0.527205	-0.249742	0.802787	1
ENSG00000087502	ERGIC2	2603.82	0.0983298	0.488384	0.201337	0.840435	1
ENSG00000087510	TFAP2C	2.33799	0.406584	1.2228	0.332502	0.73951	1
ENSG00000087586	AURKA	917.531	0.210235	0.914788	0.229818	0.818233	1
ENSG00000087589	CASS4	538.6	0.0744553	0.258495	0.288034	0.773321	1
ENSG00000087842	PIR	56.7257	-0.249287	0.621684	-0.400987	0.68843	1
ENSG00000087884	AAMDC	189.085	-0.0851731	0.275365	-0.30931	0.757086	1
ENSG00000087903	RFX2	526.419	-0.0313867	0.300144	-0.104572	0.916715	1
ENSG00000087995	METTL2A	1417.56	0.0880739	0.486153	0.181165	0.856238	1
ENSG00000088002	SULT2B1	60.9579	-0.0261857	0.572541	-0.045736	0.963521	1
ENSG00000088035	ALG6	1126.88	0.0941569	0.353568	0.266305	0.790004	1
ENSG00000088038	CNOT3	3953.09	-0.154966	0.331157	-0.467952	0.639819	1
ENSG00000088053	GP6	33.5991	0.601449	0.455014	1.32182	0.186227	1
ENSG00000088179	PTPN4	1937.32	-0.187342	0.528587	-0.354421	0.723023	1
ENSG00000088205	DDX18	8774.07	0.0963181	0.382329	0.251925	0.801099	1
ENSG00000088247	KHSRP	14284.1	0.0480502	0.544134	0.0883058	0.929634	1
ENSG00000088256	GNA11	678.683	0.0357384	0.362087	0.0987012	0.921376	1
ENSG00000088280	ASAP3	46.3569	0.381165	0.54277	0.702258	0.482518	1
ENSG00000088298	EDEM2	1567.42	-0.0929883	0.191307	-0.486069	0.626918	1
ENSG00000088305	DNMT3B	178.305	-0.58043	0.514833	-1.12742	0.259567	1
ENSG00000088320	REM1	0.804267	0.844702	4.79155	0.17629	0.860066	1
ENSG00000088325	TPX2	2473.2	-0.0153468	0.960453	-0.0159787	0.987251	1
ENSG00000088340	FER1L4	35.9571	-0.225157	0.534608	-0.421163	0.673636	1
ENSG00000088356	PDRG1	1445.21	-0.0498738	0.265473	-0.187867	0.850981	1
ENSG00000088367	EPB41L1	30.0318	0.278171	0.917198	0.303283	0.761674	1
ENSG00000088386	SLC15A1	24.7284	-0.186628	0.606892	-0.307514	0.758452	1
ENSG00000088387	DOCK9	4495.43	0.0191915	0.386343	0.0496749	0.960381	1
ENSG00000088448	ANKRD10	4126.73	0.324689	0.394966	0.822069	0.411038	1
ENSG00000088451	TGDS	1149.13	-0.00016568	0.491821	-0.000336871	0.999731	1
ENSG00000088538	DOCK3	206.759	-0.188701	0.356281	-0.529642	0.59636	1
ENSG00000088543	C3orf18	932.313	-0.0166582	0.263808	-0.0631452	0.949651	1
ENSG00000088682	COQ9	1540.27	0.0427523	0.352769	0.121191	0.90354	1
ENSG00000088726	TMEM40	15.4656	-0.0978656	0.567435	-0.17247	0.863068	1
ENSG00000088727	KIF9	130.019	-0.0175441	0.391596	-0.0448017	0.964265	1
ENSG00000088756	ARHGAP28	60.6846	0.31491	0.442264	0.712041	0.47644	1
ENSG00000088766	CRLS1	2315.55	0.0586848	0.313211	0.187365	0.851374	1
ENSG00000088808	PPP1R13B	1110.28	-0.0398814	0.235357	-0.169451	0.865442	1
ENSG00000088812	ATRN	1150.78	0.0934101	0.339498	0.275142	0.783207	1
ENSG00000088826	SMOX	266.632	0.0770648	0.544403	0.141558	0.887429	1
ENSG00000088827	SIGLEC1	4.18774	-2.11084	1.51602	-1.39235	0.163815	1
ENSG00000088832	FKBP1A	9626.65	-0.0105135	0.529299	-0.019863	0.984153	1
ENSG00000088833	NSFL1C	4211.17	0.0563774	0.472647	0.11928	0.905053	1
ENSG00000088836	SLC4A11	36.3315	-0.0526013	0.770562	-0.0682635	0.945576	1
ENSG00000088854	C20orf194	254.469	0.00889695	0.307024	0.028978	0.976882	1
ENSG00000088876	ZNF343	632.645	0.185093	0.180333	1.0264	0.304705	1
ENSG00000088881	EBF4	242.457	0.0982014	0.420965	0.233277	0.815547	1
ENSG00000088882	CPXM1	189.943	-0.459598	0.606592	-0.757672	0.448647	1
ENSG00000088888	MAVS	6432.61	0.0774628	0.240247	0.322429	0.747127	1
ENSG00000088899	LZTS3	1539.79	-0.012795	0.730427	-0.0175171	0.986024	1
ENSG00000088926	F11	1.25506	-0.110919	1.93596	-0.0572939	0.954311	1
ENSG00000088930	XRN2	5377.13	0.00525842	0.343763	0.0152966	0.987796	1
ENSG00000088970	KIZ	1030.29	0.17125	0.585809	0.292331	0.770034	1
ENSG00000088986	DYNLL1	4395.2	-0.061147	0.498855	-0.122575	0.902444	1
ENSG00000088992	TESC	396.935	-0.317188	0.646235	-0.490825	0.62355	1
ENSG00000089006	SNX5	5474.22	-0.0225133	0.397393	-0.0566526	0.954822	1
ENSG00000089009	RPL6	83440.9	-0.0651118	0.245835	-0.26486	0.791118	1
ENSG00000089012	SIRPG	1929.95	-0.0717059	0.386542	-0.185506	0.852832	1
ENSG00000089022	MAPKAPK5	3578.36	-0.0315672	0.283461	-0.111363	0.911328	1
ENSG00000089041	P2RX7	894.928	-0.0334432	0.289779	-0.115409	0.908121	1
ENSG00000089048	ESF1	1727.41	0.0912491	0.587034	0.155441	0.876474	1
ENSG00000089050	RBBP9	753.457	0.0161918	0.373977	0.0432963	0.965465	1
ENSG00000089053	ANAPC5	8468.34	0.0442245	0.235261	0.187981	0.850892	1
ENSG00000089057	SLC23A2	2289.69	0.0705339	0.232313	0.303616	0.76142	1
ENSG00000089060	SLC8B1	4529.25	-0.0185722	0.339354	-0.0547281	0.956355	1
ENSG00000089063	TMEM230	4989.63	0.0897047	0.104047	0.862158	0.388601	1
ENSG00000089091	DZANK1	176.198	-0.298258	0.411175	-0.72538	0.468219	1
ENSG00000089094	KDM2B	3847.26	-0.0389152	0.248468	-0.156621	0.875544	1
ENSG00000089123	TASP1	519.137	0.0330648	0.255527	0.129399	0.897042	1
ENSG00000089127	OAS1	846.386	-0.329131	0.551714	-0.596561	0.5508	1
ENSG00000089154	GCN1	10105.1	0.0355236	0.394368	0.0900774	0.928226	1
ENSG00000089157	RPLP0	157356	-0.0710029	0.453016	-0.156734	0.875455	1
ENSG00000089159	PXN	7368.01	-0.0357429	0.264875	-0.134942	0.892657	1
ENSG00000089163	SIRT4	138.467	-0.0908744	0.404649	-0.224576	0.822309	1
ENSG00000089169	RPH3A	39.0666	-0.011573	0.478526	-0.0241847	0.980705	1
ENSG00000089177	KIF16B	472.87	0.235091	0.390496	0.602032	0.547153	1
ENSG00000089195	TRMT6	1988.1	0.102754	0.406204	0.252962	0.800298	1
ENSG00000089199	CHGB	9.75291	0.365259	0.674974	0.541145	0.588408	1
ENSG00000089220	PEBP1	9623.27	-0.0672084	0.307886	-0.21829	0.827203	1
ENSG00000089234	BRAP	1603.64	0.00043592	0.210082	0.002075	0.998344	1
ENSG00000089248	ERP29	11327.3	-0.136815	0.299378	-0.456996	0.647674	1
ENSG00000089250	NOS1	65.5948	0.255587	0.555287	0.46028	0.645315	1
ENSG00000089280	FUS	35011.3	-0.020441	0.500158	-0.040869	0.9674	1
ENSG00000089289	IGBP1	4173.47	-0.0916216	0.308834	-0.29667	0.766719	1
ENSG00000089327	FXYD5	22272.3	-0.0586393	0.344172	-0.170378	0.864713	1
ENSG00000089335	ZNF302	2486.19	0.0520862	0.345132	0.150917	0.880041	1
ENSG00000089351	GRAMD1A	7913.43	0.00170464	0.301956	0.00564535	0.995496	1
ENSG00000089356	FXYD3	14.223	-0.551169	0.694435	-0.793694	0.427373	1
ENSG00000089472	HEPH	1.70865	1.2886	1.75804	0.732974	0.463574	1
ENSG00000089486	CDIP1	3498.54	-0.0380183	0.387526	-0.098105	0.921849	1
ENSG00000089505	CMTM1	75.1207	-0.0883907	0.550987	-0.160423	0.872548	1
ENSG00000089558	KCNH4	64.5663	0.596685	0.892272	0.668725	0.503671	1
ENSG00000089597	GANAB	14662.7	0.0342699	0.294231	0.116473	0.907278	1
ENSG00000089639	GMIP	7757.59	0.0439948	0.388148	0.113346	0.909757	1
ENSG00000089682	RBM41	354.943	0.0244328	0.505924	0.0482934	0.961482	1
ENSG00000089685	BIRC5	2134.98	0.0645148	0.976672	0.0660557	0.947333	1
ENSG00000089692	LAG3	2298.72	0.357458	1.16361	0.307198	0.758693	1
ENSG00000089693	MLF2	6292.36	-0.0478859	0.374716	-0.127792	0.898313	1
ENSG00000089723	OTUB2	44.8217	0.0495543	0.666446	0.0743561	0.940727	1
ENSG00000089737	DDX24	13730.2	-0.0320055	0.27194	-0.117693	0.906311	1
ENSG00000089775	ZBTB25	4397.17	0.132784	0.529418	0.250812	0.80196	1
ENSG00000089818	NECAP1	2872.07	0.0709956	0.206868	0.343192	0.731454	1
ENSG00000089820	ARHGAP4	14707.8	0.0168354	0.294943	0.0570802	0.954481	1
ENSG00000089847	ANKRD24	243.639	-0.0719709	0.468773	-0.15353	0.87798	1
ENSG00000089876	DHX32	816.901	0.195133	0.461794	0.422555	0.67262	1
ENSG00000089902	RCOR1	1824.24	0.0631418	0.289352	0.218218	0.827259	1
ENSG00000089916	GPATCH2L	2521.33	0.228458	0.353842	0.645649	0.518507	1
ENSG00000090006	LTBP4	5234.88	-0.00511613	0.406827	-0.0125757	0.989966	1
ENSG00000090013	BLVRB	798.46	-0.254513	0.437583	-0.581633	0.560814	1
ENSG00000090020	SLC9A1	1355.29	-0.013575	0.418439	-0.0324421	0.974119	1
ENSG00000090054	SPTLC1	2652.21	0.0657558	0.232628	0.282665	0.777434	1
ENSG00000090060	PAPOLA	9656.4	0.0271671	0.280392	0.0968896	0.922814	1
ENSG00000090061	CCNK	3880.24	0.134263	0.362539	0.370342	0.711128	1
ENSG00000090097	PCBP4	824.346	-0.190944	0.382177	-0.499621	0.617342	1
ENSG00000090104	RGS1	3282.27	0.396127	0.545808	0.725762	0.467985	1
ENSG00000090238	YPEL3	7260.02	-0.0530811	0.594801	-0.0892417	0.92889	1
ENSG00000090263	MRPS33	2185.31	-0.0501276	0.318272	-0.1575	0.874851	1
ENSG00000090266	NDUFB2	3992.08	-0.129138	0.432006	-0.298927	0.764996	1
ENSG00000090273	NUDC	8597.44	-0.0675992	0.566495	-0.119329	0.905015	1
ENSG00000090316	MAEA	4707.84	0.137801	0.192952	0.71417	0.475122	1
ENSG00000090339	ICAM1	2629.48	0.937355	0.723287	1.29597	0.194987	1
ENSG00000090372	STRN4	3784.43	0.154843	0.256814	0.60294	0.546548	1
ENSG00000090376	IRAK3	105.277	0.254796	0.443578	0.57441	0.56569	1
ENSG00000090382	LYZ	1354.06	0.151579	0.735881	0.205983	0.836804	1
ENSG00000090432	MUL1	1775.21	-0.031485	0.35753	-0.0880626	0.929827	1
ENSG00000090447	TFAP4	2204.01	-0.111399	0.222968	-0.499621	0.617342	1
ENSG00000090470	PDCD7	3006.89	-0.03829	0.255024	-0.150143	0.880652	1
ENSG00000090487	SPG21	3141.01	-0.0251705	0.259998	-0.0968106	0.922877	1
ENSG00000090520	DNAJB11	3819.07	0.00872667	0.410465	0.0212604	0.983038	1
ENSG00000090530	P3H2	10.6476	-0.88403	1.0132	-0.872516	0.382927	1
ENSG00000090539	CHRD	4.52727	0.488976	1.29851	0.376567	0.706496	1
ENSG00000090554	FLT3LG	7253.65	-0.114417	0.366203	-0.312443	0.754704	1
ENSG00000090565	RAB11FIP3	2302.77	-0.073266	0.252044	-0.290687	0.771291	1
ENSG00000090581	GNPTG	3558.91	-0.0176137	0.277579	-0.0634547	0.949404	1
ENSG00000090612	ZNF268	1113.98	0.137916	0.302896	0.455324	0.648876	1
ENSG00000090615	GOLGA3	6392.05	0.0605963	0.238308	0.254278	0.799281	1
ENSG00000090621	PABPC4	17594.3	0.0109775	0.303807	0.036133	0.971176	1
ENSG00000090659	CD209	16.6212	-0.0304739	0.531171	-0.0573711	0.95425	1
ENSG00000090661	CERS4	1130.48	-0.00655819	0.327408	-0.0200306	0.984019	1
ENSG00000090674	MCOLN1	817.928	-0.135917	0.328825	-0.413342	0.679356	1
ENSG00000090686	USP48	3453.97	0.14931	0.418598	0.356692	0.721323	1
ENSG00000090776	EFNB1	596.537	-0.0192057	0.303903	-0.0631968	0.94961	1
ENSG00000090857	PDPR	4540.17	0.133446	0.236359	0.564588	0.572354	1
ENSG00000090861	AARS	13312	-0.046823	0.362018	-0.129339	0.89709	1
ENSG00000090863	GLG1	9395.67	-0.0232159	0.282038	-0.0823148	0.934396	1
ENSG00000090889	KIF4A	567.157	0.505685	0.96575	0.523618	0.600544	1
ENSG00000090905	TNRC6A	4871.42	0.0529195	0.278334	0.19013	0.849208	1
ENSG00000090924	PLEKHG2	1581.88	0.0260503	0.764856	0.0340591	0.97283	1
ENSG00000090932	DLL3	35.8308	0.168055	0.837099	0.200759	0.840887	1
ENSG00000090971	NAT14	309.092	-0.220293	0.418741	-0.526084	0.59883	1
ENSG00000090975	PITPNM2	2548.75	0.0473365	0.362062	0.130741	0.89598	1
ENSG00000090989	EXOC1	1824.37	0.0135239	0.465875	0.029029	0.976841	1
ENSG00000091009	RBM27	2629.35	0.0184448	0.321158	0.057432	0.954201	1
ENSG00000091010	POU4F3	3.03593	2.8451	1.79238	1.58733	0.112438	1
ENSG00000091039	OSBPL8	4483.08	0.124913	0.484709	0.257707	0.796633	1
ENSG00000091073	DTX2	1235.54	-0.0293746	0.267784	-0.109695	0.912651	1
ENSG00000091106	NLRC4	39.2353	-0.461075	0.42292	-1.09022	0.275617	1
ENSG00000091127	PUS7	973.605	-0.481112	0.611633	-0.786604	0.431514	1
ENSG00000091128	LAMB4	2.72115	-0.615666	1.72939	-0.356001	0.721839	1
ENSG00000091129	NRCAM	317.479	-0.256751	0.785169	-0.327001	0.743667	1
ENSG00000091136	LAMB1	30.7244	0.138872	0.665151	0.208783	0.834618	1
ENSG00000091137	SLC26A4	31.3497	-0.461484	0.818163	-0.564049	0.572721	1
ENSG00000091138	SLC26A3	4.5227	-2.48767	0.967903	-2.57017	0.0101649	1
ENSG00000091140	DLD	3145.12	0.136348	0.465982	0.292604	0.769825	1
ENSG00000091157	WDR7	1372.76	0.0179081	0.251344	0.0712494	0.943199	1
ENSG00000091164	TXNL1	3776.62	-0.115735	0.204917	-0.564788	0.572218	1
ENSG00000091181	IL5RA	52.5629	-0.337551	0.693862	-0.486482	0.626626	1
ENSG00000091262	ABCC6	125.373	0.0339862	0.33341	0.101935	0.918808	1
ENSG00000091317	CMTM6	6044	0.0519954	0.448642	0.115895	0.907736	1
ENSG00000091409	ITGA6	4611.6	0.027816	0.586361	0.0474385	0.962164	1
ENSG00000091428	RAPGEF4	33.6682	-0.469536	0.808514	-0.580739	0.561417	1
ENSG00000091436	MAP3K20	440.908	-0.240292	0.612007	-0.39263	0.694593	1
ENSG00000091483	FH	2802.66	0.00318086	0.513174	0.0061984	0.995054	1
ENSG00000091490	SEL1L3	2936.57	0.0660382	0.340637	0.193867	0.84628	1
ENSG00000091513	TF	478.363	-0.151307	0.347115	-0.435899	0.66291	1
ENSG00000091527	CDV3	13653.2	0.0907346	0.273225	0.332088	0.739823	1
ENSG00000091536	MYO15A	78.5891	-0.149222	0.392008	-0.380662	0.703454	1
ENSG00000091542	ALKBH5	6102.44	-0.0190635	0.143967	-0.132416	0.894655	1
ENSG00000091583	APOH	10.5639	0.476021	0.605281	0.786446	0.431606	1
ENSG00000091592	NLRP1	14608.1	0.00506286	0.661114	0.00765807	0.99389	1
ENSG00000091622	PITPNM3	42.128	0.107867	0.546366	0.197427	0.843493	1
ENSG00000091640	SPAG7	2518.26	-0.114722	0.28993	-0.395688	0.692336	1
ENSG00000091651	ORC6	1264.73	0.0139222	0.53808	0.0258739	0.979358	1
ENSG00000091656	ZFHX4	8.96408	-0.598435	0.905328	-0.661015	0.508603	1
ENSG00000091732	ZC3HC1	1082.55	0.0526002	0.364488	0.144313	0.885254	1
ENSG00000091831	ESR1	193.391	-0.409074	0.760658	-0.53779	0.590722	1
ENSG00000091844	RGS17	102.866	0.166849	0.634189	0.26309	0.792481	1
ENSG00000091879	ANGPT2	45.9983	-0.665879	0.439874	-1.51379	0.130078	1
ENSG00000091947	TMEM101	1724.96	-0.119868	0.291574	-0.411108	0.680993	1
ENSG00000091972	CD200	1824.06	0.221641	0.866616	0.255755	0.79814	1
ENSG00000091986	CCDC80	119.97	-0.0964637	0.348492	-0.276803	0.781931	1
ENSG00000092009	CMA1	2.05557	-0.379415	1.75468	-0.216231	0.828808	1
ENSG00000092010	PSME1	16817	-0.0199222	0.496481	-0.0401267	0.967992	1
ENSG00000092020	PPP2R3C	1596.17	0.128642	0.311998	0.412315	0.680109	1
ENSG00000092036	HAUS4	1927.66	-0.0822041	0.386883	-0.212478	0.831734	1
ENSG00000092051	JPH4	12.8993	-0.244397	0.926291	-0.263845	0.7919	1
ENSG00000092054	MYH7	3.93288	-1.24904	2.8145	-0.443787	0.657196	1
ENSG00000092067	CEBPE	83.3352	-0.198544	0.731393	-0.271461	0.786037	1
ENSG00000092068	SLC7A8	459.738	-0.349128	0.505143	-0.691148	0.489473	1
ENSG00000092094	OSGEP	3137.5	0.0804923	0.272259	0.295646	0.7675	1
ENSG00000092096	SLC22A17	1136.82	0.142128	0.435608	0.326275	0.744216	1
ENSG00000092098	RNF31	4277.49	0.0546028	0.344006	0.158726	0.873885	1
ENSG00000092108	SCFD1	1701.84	0.0793022	0.493197	0.160792	0.872257	1
ENSG00000092140	G2E3	1259.86	0.101512	0.565767	0.179423	0.857606	1
ENSG00000092148	HECTD1	3764.41	0.0446331	0.344709	0.129481	0.896977	1
ENSG00000092199	HNRNPC	42376.2	0.0835031	0.29395	0.284073	0.776355	1
ENSG00000092200	RPGRIP1	22.6681	-0.475237	0.466773	-1.01813	0.308614	1
ENSG00000092201	SUPT16H	9011.09	-0.0100289	0.450915	-0.0222413	0.982255	1
ENSG00000092203	TOX4	4342.09	0.0868321	0.4389	0.19784	0.84317	1
ENSG00000092208	GEMIN2	615.924	-0.041148	0.240968	-0.170761	0.864411	1
ENSG00000092295	TGM1	150.587	-0.00438413	0.647748	-0.00676827	0.9946	1
ENSG00000092330	TINF2	4293.84	-0.0655874	0.353042	-0.185778	0.852619	1
ENSG00000092345	DAZL	12.2553	-0.126941	1.09898	-0.115508	0.908042	1
ENSG00000092421	SEMA6A	217.013	-0.0806816	0.603188	-0.133759	0.893593	1
ENSG00000092439	TRPM7	3733.81	0.119413	0.465283	0.256646	0.797452	1
ENSG00000092445	TYRO3	180.065	0.211403	0.499571	0.423169	0.672172	1
ENSG00000092470	WDR76	1767.07	-0.111846	0.614645	-0.181969	0.855607	1
ENSG00000092529	CAPN3	423.981	0.158095	0.782455	0.202051	0.839877	1
ENSG00000092531	SNAP23	3057.53	0.147528	0.273536	0.539336	0.589655	1
ENSG00000092607	TBX15	2.0759	-0.77541	2.07509	-0.373676	0.708645	1
ENSG00000092621	PHGDH	4420.9	-0.222593	0.736943	-0.302049	0.762614	1
ENSG00000092758	COL9A3	26.2998	0.4058	0.906006	0.4479	0.654225	1
ENSG00000092820	EZR	13824.1	-0.0582713	0.450926	-0.129226	0.897179	1
ENSG00000092841	MYL6	26400.2	-0.111555	0.526503	-0.211878	0.832202	1
ENSG00000092847	AGO1	2715.99	0.0895307	0.319393	0.280316	0.779235	1
ENSG00000092850	TEKT2	4.63148	-1.11143	1.24324	-0.893985	0.37133	1
ENSG00000092853	CLSPN	1325.85	0.21777	0.990645	0.219826	0.826006	1
ENSG00000092871	RFFL	3736.67	0.0478829	0.289537	0.165378	0.868647	1
ENSG00000092929	UNC13D	7152.48	0.059716	0.327524	0.182326	0.855327	1
ENSG00000092931	MFSD11	1301.97	0.0514459	0.205221	0.250685	0.802058	1
ENSG00000092964	DPYSL2	693.971	0.153191	0.340802	0.4495	0.653071	1
ENSG00000092969	TGFB2	3.73226	-0.386182	1.64553	-0.234686	0.814453	1
ENSG00000092978	GPATCH2	532.098	-0.0344807	0.403111	-0.0855364	0.931835	1
ENSG00000093000	NUP50	7577.49	0.0986921	0.378471	0.260765	0.794274	1
ENSG00000093009	CDC45	1486.82	-0.449529	0.947502	-0.474435	0.63519	1
ENSG00000093010	COMT	2785.5	-0.173866	0.37144	-0.468087	0.639722	1
ENSG00000093072	ADA2	3818.22	0.0406377	0.680065	0.0597556	0.95235	1
ENSG00000093100	AC016026.1	396.135	0.163518	0.421809	0.387658	0.698269	1
ENSG00000093134	VNN3	79.8718	0.0443816	0.551719	0.0804425	0.935885	1
ENSG00000093144	ECHDC1	3022.51	0.0481017	0.456018	0.105482	0.915993	1
ENSG00000093167	LRRFIP2	1364.99	-0.0507887	0.151867	-0.334429	0.738056	1
ENSG00000093183	SEC22C	2405.83	0.0611192	0.183433	0.333197	0.738986	1
ENSG00000093217	XYLB	131.603	-0.0400616	0.764107	-0.0524293	0.958187	1
ENSG00000094631	HDAC6	2433.37	0.276908	0.237776	1.16458	0.24419	1
ENSG00000094661	OR1I1	106.158	-0.0330709	0.294614	-0.112252	0.910624	1
ENSG00000094755	GABRP	23.4672	0.97678	0.51431	1.8992	0.0575377	1
ENSG00000094804	CDC6	1686.56	-0.168223	0.895798	-0.187792	0.85104	1
ENSG00000094841	UPRT	865.137	0.00474337	0.335803	0.0141254	0.98873	1
ENSG00000094880	CDC23	1891	0.0458207	0.311078	0.147297	0.882898	1
ENSG00000094914	AAAS	2759.47	0.0414524	0.410596	0.100957	0.919585	1
ENSG00000094916	CBX5	6668.02	0.134851	0.267891	0.503381	0.614696	1
ENSG00000094975	SUCO	2229.55	-0.01044	0.546756	-0.0190944	0.984766	1
ENSG00000095002	MSH2	2432.78	0.208671	0.57883	0.360504	0.71847	1
ENSG00000095015	MAP3K1	4743.78	-0.00717141	0.509393	-0.0140784	0.988767	1
ENSG00000095059	DHPS	4946.7	-0.0245417	0.28096	-0.0873495	0.930394	1
ENSG00000095066	HOOK2	951.28	0.0518281	0.235607	0.219976	0.825889	1
ENSG00000095139	ARCN1	7444.16	0.0395197	0.189582	0.208457	0.834872	1
ENSG00000095203	EPB41L4B	5.03046	0.567506	1.43355	0.395875	0.692197	1
ENSG00000095209	TMEM38B	913.316	-0.0830961	0.278371	-0.298508	0.765316	1
ENSG00000095261	PSMD5	2309.95	0.0444992	0.296815	0.149922	0.880826	1
ENSG00000095303	PTGS1	206.803	-0.161374	0.412342	-0.391359	0.695532	1
ENSG00000095319	NUP188	6543.51	0.0660419	0.503012	0.131293	0.895544	1
ENSG00000095321	CRAT	1062.02	-0.0586569	0.436703	-0.134318	0.893151	1
ENSG00000095370	SH2D3C	2548.6	-0.0856764	0.37709	-0.227204	0.820265	1
ENSG00000095380	NANS	2540.8	0.0752783	0.389868	0.193087	0.846891	1
ENSG00000095383	TBC1D2	468.659	-0.14294	0.330702	-0.432233	0.665572	1
ENSG00000095397	WHRN	147.405	0.233134	0.40773	0.571785	0.567467	1
ENSG00000095464	PDE6C	43.4048	-0.825428	0.820546	-1.00595	0.31444	1
ENSG00000095485	CWF19L1	2876.68	-0.0872296	0.163864	-0.53233	0.594497	1
ENSG00000095539	SEMA4G	209.061	0.183633	0.505501	0.36327	0.716403	1
ENSG00000095564	BTAF1	3339.34	0.248176	0.494284	0.502091	0.615604	1
ENSG00000095574	IKZF5	2192.17	0.0101852	0.314356	0.0324001	0.974153	1
ENSG00000095585	BLNK	42.5905	-0.307774	0.422626	-0.728244	0.466464	1
ENSG00000095587	TLL2	15.2975	-0.393498	0.749113	-0.525285	0.599385	1
ENSG00000095627	TDRD1	17.0138	-0.195758	0.655058	-0.29884	0.765062	1
ENSG00000095637	SORBS1	55.9022	-0.356972	0.699153	-0.510577	0.609647	1
ENSG00000095713	CRTAC1	2.62503	-1.20792	1.67188	-0.722492	0.469992	1
ENSG00000095739	BAMBI	12.3734	-1.8668	0.755593	-2.47064	0.013487	1
ENSG00000095752	IL11	11.3999	0.110375	0.834733	0.132228	0.894804	1
ENSG00000095787	WAC	8018.31	0.143571	0.264991	0.541796	0.587959	1
ENSG00000095794	CREM	3862.29	0.166163	0.617935	0.2689	0.788007	1
ENSG00000095906	NUBP2	5137.58	-0.0373172	0.406374	-0.0918296	0.926833	1
ENSG00000095917	TPSD1	13.6558	-0.730357	0.953849	-0.765695	0.443858	1
ENSG00000095932	SMIM24	112.755	-0.245329	0.588765	-0.416685	0.676909	1
ENSG00000095951	HIVEP1	1730.94	0.0240822	0.442831	0.0543824	0.95663	1
ENSG00000095970	TREM2	7.00143	-0.961535	1.22068	-0.787706	0.430869	1
ENSG00000096060	FKBP5	8105.63	0.00418295	0.479842	0.00871735	0.993045	1
ENSG00000096063	SRPK1	3531.17	0.136735	0.497873	0.274639	0.783593	1
ENSG00000096070	BRPF3	2040.4	0.0517193	0.181977	0.284207	0.776252	1
ENSG00000096080	MRPS18A	1809.64	-0.032053	0.510052	-0.0628426	0.949892	1
ENSG00000096088	PGC	2.17891	-0.692498	1.77369	-0.390428	0.69622	1
ENSG00000096092	TMEM14A	596.346	-0.0900058	0.393695	-0.228618	0.819166	1
ENSG00000096093	EFHC1	441.75	-0.138658	0.6201	-0.223607	0.823064	1
ENSG00000096264	NCR2	7.00957	2.28036	1.56295	1.45901	0.144563	1
ENSG00000096384	HSP90AB1	86263.4	0.00486531	0.622108	0.00782067	0.99376	1
ENSG00000096401	CDC5L	2655.6	0.0675677	0.354785	0.190447	0.848959	1
ENSG00000096433	ITPR3	4689.67	0.178788	0.324404	0.551126	0.581547	1
ENSG00000096654	ZNF184	572.684	0.118681	0.44585	0.266191	0.790092	1
ENSG00000096696	DSP	12.3133	1.78263	1.04276	1.70953	0.0873537	1
ENSG00000096717	SIRT1	2627.89	0.0106654	0.400482	0.0266313	0.978754	1
ENSG00000096746	HNRNPH3	10595.6	0.00576024	0.312981	0.0184045	0.985316	1
ENSG00000096872	IFT74	288.047	-0.040244	0.371988	-0.108186	0.913848	1
ENSG00000096968	JAK2	1089.3	0.2141	0.521409	0.410617	0.681353	1
ENSG00000096996	IL12RB1	2374.62	-0.0909471	0.525735	-0.17299	0.862659	1
ENSG00000097007	ABL1	2533.79	-0.0378083	0.392927	-0.0962224	0.923344	1
ENSG00000097021	ACOT7	3769.95	-0.158415	0.912152	-0.173672	0.862123	1
ENSG00000097033	SH3GLB1	3937.26	-0.0766647	0.312171	-0.245586	0.806003	1
ENSG00000097046	CDC7	711.776	0.0897077	0.475312	0.188734	0.850301	1
ENSG00000097096	SYDE2	131.786	0.144256	0.412194	0.349972	0.72636	1
ENSG00000099139	PCSK5	1109.39	0.365988	0.5352	0.683835	0.49408	1
ENSG00000099194	SCD	2335.77	0.0396817	0.807988	0.0491117	0.96083	1
ENSG00000099203	TMED1	941.295	0.0689324	0.509965	0.135171	0.892477	1
ENSG00000099204	ABLIM1	17163.9	0.0471114	0.423989	0.111115	0.911525	1
ENSG00000099219	ERMP1	1071.48	0.0341495	0.370942	0.0920616	0.926649	1
ENSG00000099246	RAB18	2491	0.0900103	0.366347	0.245697	0.805917	1
ENSG00000099250	NRP1	102.377	0.363523	0.385129	0.943901	0.34522	1
ENSG00000099251	HSD17B7P2	349.167	-0.0308683	0.60474	-0.0510439	0.959291	1
ENSG00000099256	PRTFDC1	48.6925	-0.246439	0.429286	-0.574066	0.565923	1
ENSG00000099260	PALMD	17.8334	-0.121465	0.718911	-0.168957	0.86583	1
ENSG00000099282	TSPAN15	127.962	-0.162267	0.378899	-0.42826	0.668462	1
ENSG00000099284	H2AFY2	503.221	-0.110734	0.470673	-0.235267	0.814002	1
ENSG00000099290	WASHC2A	2956.36	0.0578381	0.183019	0.316023	0.751985	1
ENSG00000099308	MAST3	3505.01	-0.013659	0.312133	-0.0437602	0.965096	1
ENSG00000099326	MZF1	1680.13	-0.0325864	0.27571	-0.118191	0.905916	1
ENSG00000099330	OCEL1	747.362	-0.0742277	0.425455	-0.174467	0.861499	1
ENSG00000099331	MYO9B	8247.86	0.0447181	0.256817	0.174125	0.861768	1
ENSG00000099337	KCNK6	2276.35	-0.049797	0.256224	-0.19435	0.845902	1
ENSG00000099338	CATSPERG	191.795	-0.226962	0.327412	-0.693198	0.488186	1
[truncated: 30,907 more rows]

## Sheet: 8hr CD3
8hr CD3 DE
id	gene_name	baseMean	log2FoldChange	lfcSE	stat	pvalue	padj
ENSG00000000003	TSPAN6	120.126	-0.242477	0.490934	-0.49391	0.62137	0.875478
ENSG00000000419	DPM1	2457.99	0.529185	0.341594	1.54916	0.121343	0.461763
ENSG00000000457	SCYL3	1489.52	0.453235	0.222718	2.03502	0.0418487	0.278307
ENSG00000000460	C1orf112	700.154	0.340756	0.744419	0.457748	0.647133	0.885726
ENSG00000000938	FGR	157.443	-0.0574391	0.557445	-0.10304	0.917931	0.978261
ENSG00000000971	CFH	111.2	-0.176177	0.37349	-0.471704	0.637138	0.881912
ENSG00000001036	FUCA2	493.646	-0.167806	0.403437	-0.415942	0.677453	0.897548
ENSG00000001084	GCLC	1637.07	-0.115536	0.289714	-0.398794	0.690045	0.902124
ENSG00000001167	NFYA	2353.56	0.92571	0.295345	3.13434	0.00172243	0.0398739
ENSG00000001460	STPG1	382.459	0.0179491	0.176523	0.101681	0.91901	0.978692
ENSG00000001461	NIPAL3	3041.64	-0.417946	0.20856	-2.00396	0.0450746	0.289158
ENSG00000001497	LAS1L	3728.22	0.59014	0.45726	1.2906	0.196842	0.567629
ENSG00000001561	ENPP4	858.987	0.127504	0.522759	0.243905	0.807305	0.942
ENSG00000001617	SEMA3F	5.30227	-1.29015	1.62747	-0.792736	0.427932	NA
ENSG00000001626	CFTR	24.8971	0.0172648	0.544239	0.0317228	0.974693	0.994947
ENSG00000001629	ANKIB1	2161.2	0.0242928	0.426911	0.0569038	0.954622	0.98993
ENSG00000001630	CYP51A1	1520.52	1.42572	0.4235	3.36651	0.000761255	0.0223298
ENSG00000001631	KRIT1	1853.27	-0.155548	0.479536	-0.324371	0.745657	0.922582
ENSG00000002016	RAD52	941.965	-0.597133	0.439579	-1.35842	0.17433	0.540192
ENSG00000002079	MYH16	5.65082	-1.06266	0.983494	-1.0805	0.27992	NA
ENSG00000002330	BAD	1059.74	-0.125424	0.439453	-0.285409	0.775331	0.934184
ENSG00000002549	LAP3	3762.94	1.81451	0.641224	2.82977	0.00465819	0.077121
ENSG00000002586	CD99	7216.37	0.166285	0.243148	0.683882	0.49405	0.809427
ENSG00000002587	HS3ST1	36.619	1.3036	0.896512	1.45408	0.145924	0.499675
ENSG00000002726	AOC1	38.9027	0.26433	0.762995	0.346437	0.729014	0.917217
ENSG00000002745	WNT16	7.43983	0.813129	1.05925	0.767646	0.442698	NA
ENSG00000002746	HECW1	9.21977	-0.0778192	1.42474	-0.05462	0.956441	0.990137
ENSG00000002822	MAD1L1	3942.3	-0.661366	0.502644	-1.31577	0.18825	0.556916
ENSG00000002834	LASP1	11677.4	-0.400651	0.44612	-0.89808	0.369143	0.726284
ENSG00000002919	SNX11	1682.98	0.392572	0.332585	1.18037	0.237855	0.613945
ENSG00000002933	TMEM176A	52.2402	0.45572	0.630794	0.722455	0.470015	0.796049
ENSG00000003056	M6PR	10355.3	0.828029	0.300192	2.75833	0.00580983	0.0892373
ENSG00000003096	KLHL13	76.8713	-0.283839	0.662681	-0.428319	0.668419	0.895022
ENSG00000003137	CYP26B1	7.2921	0.000864203	1.09043	0.000792534	0.999368	NA
ENSG00000003147	ICA1	112.285	0.0245948	0.492226	0.0499666	0.960149	0.9912
ENSG00000003249	DBNDD1	78.2902	-0.452545	0.591112	-0.765584	0.443924	0.778233
ENSG00000003393	ALS2	730.402	-0.00857578	0.32147	-0.0266767	0.978718	0.995732
ENSG00000003400	CASP10	3091.64	1.12422	0.290089	3.87544	0.000106433	0.00511032
ENSG00000003402	CFLAR	11818	1.38404	0.550158	2.51571	0.0118794	0.137157
ENSG00000003436	TFPI	383.192	0.158826	0.435014	0.365106	0.715032	0.912241
ENSG00000003509	NDUFAF7	923.745	0.0937868	0.291858	0.321344	0.747949	0.923885
ENSG00000003756	RBM5	11400.7	-0.248217	0.343179	-0.723286	0.469504	0.795807
ENSG00000003987	MTMR7	85.5654	-0.45367	0.532652	-0.851719	0.39437	0.744302
ENSG00000004059	ARF5	6526.55	0.149777	0.375594	0.398772	0.690061	0.902124
ENSG00000004139	SARM1	2027.12	-0.549753	0.404132	-1.36033	0.173726	0.539511
ENSG00000004142	POLDIP2	5419.96	0.369504	0.525991	0.702491	0.482373	0.803152
ENSG00000004399	PLXND1	785.226	-0.526878	0.40048	-1.31561	0.188304	0.556916
ENSG00000004455	AK2	7481.21	0.692476	0.530945	1.30423	0.192154	0.561543
ENSG00000004468	CD38	2422.03	2.17867	0.83813	2.59944	0.0093377	0.118809
ENSG00000004478	FKBP4	9003.64	1.1123	0.645426	1.72336	0.0848227	0.393663
ENSG00000004487	KDM1A	4323.91	0.0660853	0.249969	0.264374	0.791491	0.938319
ENSG00000004534	RBM6	7033.01	0.0429216	0.288802	0.148619	0.881854	0.966696
ENSG00000004660	CAMKK1	510.629	0.36057	0.269268	1.33907	0.180546	0.548146
ENSG00000004700	RECQL	2871.48	-0.300113	0.7284	-0.412017	0.680327	0.898287
ENSG00000004766	VPS50	1092.46	-0.336034	0.343106	-0.97939	0.327387	0.694228
ENSG00000004776	HSPB6	5.32166	2.1115	1.87227	1.12778	0.259413	NA
ENSG00000004777	ARHGAP33	304.967	-1.22457	0.55152	-2.22035	0.0263952	0.218803
ENSG00000004779	NDUFAB1	3606.07	1.1323	0.520621	2.17491	0.0296368	0.232541
ENSG00000004799	PDK4	5.87136	-2.3622	1.08651	-2.17412	0.029696	NA
ENSG00000004809	SLC22A16	79.0809	-0.469353	0.311395	-1.50726	0.131744	0.477589
ENSG00000004838	ZMYND10	134.713	-0.713333	0.384164	-1.85684	0.0633336	0.342997
ENSG00000004846	ABCB5	9.20618	-0.286466	1.03157	-0.2777	0.781243	0.935346
ENSG00000004848	ARX	24.149	-0.0205265	1.44063	-0.0142482	0.988632	0.997372
ENSG00000004864	SLC25A13	338.441	-0.091207	0.498737	-0.182876	0.854895	0.957992
ENSG00000004866	ST7	266.843	0.633375	0.483909	1.30887	0.190577	0.559668
ENSG00000004897	CDC27	2383.01	0.0135443	0.419351	0.0322982	0.974234	0.994947
ENSG00000004939	SLC4A1	16.4116	-0.0119284	0.66727	-0.0178765	0.985737	0.996519
ENSG00000004948	CALCR	0.578198	1.22954	6.34061	0.193915	0.846242	NA
ENSG00000004961	HCCS	1256.06	0.707498	0.413042	1.7129	0.0867317	0.396537
ENSG00000004975	DVL2	2981.75	0.117652	0.217955	0.539801	0.589334	0.862905
ENSG00000005001	PRSS22	6.51396	-1.64657	0.978287	-1.68312	0.0923523	NA
ENSG00000005007	UPF1	10530.7	0.34546	0.274211	1.25983	0.20773	0.578239
ENSG00000005020	SKAP2	475.3	0.145561	0.429074	0.339246	0.734425	0.918818
ENSG00000005022	SLC25A5	16921.6	1.07871	0.595991	1.80994	0.0703058	0.359044
ENSG00000005059	MCUB	7250.38	-0.138788	0.277226	-0.50063	0.616631	0.873761
ENSG00000005073	HOXA11	1.12032	0.12629	2.31695	0.0545071	0.956531	NA
ENSG00000005075	POLR2J	2847.41	0.29083	0.381282	0.762769	0.445601	0.778943
ENSG00000005100	DHX33	1968.63	0.465076	0.470677	0.9881	0.323104	0.691146
ENSG00000005102	MEOX1	351.277	-0.994749	0.418209	-2.3786	0.0173787	0.17375
ENSG00000005108	THSD7A	25.082	-0.0567214	1.02695	-0.0552329	0.955953	0.990137
ENSG00000005156	LIG3	2439.08	0.253855	0.341921	0.742436	0.457823	0.788283
ENSG00000005175	RPAP3	1717.86	0.569718	0.338019	1.68546	0.0918996	0.407214
ENSG00000005187	ACSM3	512.78	-0.386805	0.361643	-1.06958	0.284809	0.658596
ENSG00000005189	REXO5	203.229	-0.576625	0.684273	-0.842682	0.399406	0.746757
ENSG00000005194	CIAPIN1	2650.09	0.386152	0.475847	0.811504	0.417077	0.759889
ENSG00000005206	SPPL2B	5254.03	-0.525355	0.307737	-1.70715	0.0877934	0.399033
ENSG00000005238	FAM214B	387.176	-1.21659	0.312768	-3.88975	0.000100347	0.00492967
ENSG00000005243	COPZ2	42.4008	-0.755465	0.614358	-1.22968	0.218816	0.592582
ENSG00000005249	PRKAR2B	80.7971	-0.143141	0.575107	-0.248894	0.803443	0.941188
ENSG00000005302	MSL3	8707.14	0.643482	0.288917	2.22722	0.0259325	0.217587
ENSG00000005339	CREBBP	6720.32	0.0473779	0.38301	0.123699	0.901554	0.972125
ENSG00000005379	TSPOAP1	417.115	0.389397	0.422571	0.921494	0.356793	0.718047
ENSG00000005381	MPO	417.698	0.177847	0.785526	0.226406	0.820886	0.945852
ENSG00000005421	PON1	2.87798	-0.32925	1.7216	-0.191246	0.848333	NA
ENSG00000005436	GCFC2	1460.51	0.57277	0.357093	1.60398	0.108719	0.439026
ENSG00000005448	WDR54	1412.38	-0.930227	0.511421	-1.81891	0.0689258	0.355434
ENSG00000005469	CROT	579.577	-0.800116	0.325984	-2.45446	0.0141095	0.152698
ENSG00000005471	ABCB4	12.0163	-0.177856	0.990028	-0.179647	0.85743	0.958728
ENSG00000005483	KMT2E	7240.03	0.213947	0.409046	0.523039	0.600947	0.867096
ENSG00000005486	RHBDD2	3226.5	0.620059	0.331848	1.86851	0.0616916	0.338405
ENSG00000005513	SOX8	595.689	1.16934	0.500037	2.33851	0.0193606	0.185841
ENSG00000005700	IBTK	2094.21	0.200797	0.462929	0.433753	0.664468	0.894681
ENSG00000005801	ZNF195	1518.89	0.319716	0.294698	1.0849	0.277968	0.652422
ENSG00000005810	MYCBP2	5957.22	0.232956	0.415061	0.561256	0.574623	0.853871
ENSG00000005812	FBXL3	4905.76	-0.484495	0.427748	-1.13266	0.257356	0.634077
ENSG00000005844	ITGAL	19987.7	-0.95403	0.412848	-2.31085	0.020841	0.192989
ENSG00000005882	PDK2	1229.99	-1.02627	0.371883	-2.75966	0.00578624	0.0889528
ENSG00000005884	ITGA3	761.477	-0.138811	0.489479	-0.283589	0.776725	0.934347
ENSG00000005889	ZFX	2746.71	0.281147	0.494251	0.568835	0.569468	0.851303
ENSG00000005893	LAMP2	2907.77	0.173456	0.243232	0.71313	0.475766	0.799797
ENSG00000005961	ITGA2B	328.579	0.00222621	0.687953	0.003236	0.997418	0.999671
ENSG00000005981	ASB4	63.1255	0.0874878	0.404965	0.216038	0.828958	0.949452
ENSG00000006007	GDE1	1491.46	0.0302397	0.317364	0.0952841	0.924089	0.980076
ENSG00000006015	REX1BD	5243.97	-0.399636	0.398421	-1.00305	0.315836	0.684583
ENSG00000006016	CRLF1	169.647	0.950144	0.371516	2.55748	0.0105433	0.126428
ENSG00000006025	OSBPL7	1009.2	-1.02905	0.385476	-2.66956	0.00759515	0.10537
ENSG00000006042	TMEM98	16.9191	0.119285	0.733478	0.162629	0.870811	0.962777
ENSG00000006047	YBX2	7.29118	-0.152827	1.3482	-0.113356	0.909748	NA
ENSG00000006062	MAP3K14	2668.86	0.352729	0.248757	1.41797	0.156201	0.514386
ENSG00000006071	ABCC8	9.86182	0.0568661	0.687642	0.0826973	0.934092	0.983717
ENSG00000006116	CACNG3	3.15726	-0.0577422	1.62194	-0.0356007	0.971601	NA
ENSG00000006118	TMEM132A	23.0319	-0.0697521	0.681887	-0.102293	0.918524	0.978607
ENSG00000006125	AP2B1	10165.4	0.345112	0.357215	0.966116	0.333986	0.698306
ENSG00000006128	TAC1	1.17318	1.79786	6.31845	0.28454	0.775996	NA
ENSG00000006194	ZNF263	3111.17	0.549976	0.252963	2.17414	0.0296949	0.232683
ENSG00000006210	CX3CL1	11.8921	0.240359	0.608404	0.395065	0.692795	0.903114
ENSG00000006282	SPATA20	363.415	-0.969082	0.583356	-1.66122	0.0966693	0.416569
ENSG00000006283	CACNA1G	6.35423	0.93844	0.920299	1.01971	0.307865	NA
ENSG00000006327	TNFRSF12A	223.079	3.10466	0.715492	4.3392	1.43004e-05	0.00111233
ENSG00000006377	DLX6	4.84864	-0.836327	0.909309	-0.919738	0.357709	NA
ENSG00000006432	MAP3K9	410.926	-0.425431	0.330608	-1.28681	0.198159	0.568012
ENSG00000006451	RALA	3620.82	0.871935	0.253455	3.4402	0.000581288	0.0183799
ENSG00000006453	BAIAP2L1	122.686	0.531266	0.632603	0.83981	0.401015	0.747853
ENSG00000006459	KDM7A	5947.83	-0.594372	0.72532	-0.819461	0.412523	0.755651
ENSG00000006468	ETV1	4.46583	0.947465	1.18288	0.800979	0.423144	NA
ENSG00000006530	AGK	2768.7	0.127621	0.278632	0.458025	0.646934	0.88572
ENSG00000006534	ALDH3B1	155.738	-1.51422	0.621069	-2.4381	0.0147649	0.156537
ENSG00000006555	TTC22	693.881	-0.712578	0.238744	-2.9847	0.00283857	0.056039
ENSG00000006576	PHTF2	1817.06	0.125392	0.42978	0.291759	0.770471	0.931855
ENSG00000006607	FARP2	794.538	0.436295	0.354445	1.23092	0.218352	0.591989
ENSG00000006611	USH1C	1.19863	-3.17722	2.5614	-1.24042	0.214819	NA
ENSG00000006625	GGCT	1571.29	0.697728	0.481909	1.44784	0.147661	0.502279
ENSG00000006634	DBF4	1530.48	0.256118	0.719468	0.355983	0.721854	0.914517
ENSG00000006638	TBXA2R	213.732	-1.06887	0.349681	-3.05671	0.0022378	0.0475365
ENSG00000006652	IFRD1	2129.52	0.433341	0.344371	1.25835	0.208264	0.578888
ENSG00000006659	LGALS14	66.6984	3.08199	0.972188	3.17015	0.00152358	0.0367557
ENSG00000006695	COX10	1007.19	0.585817	0.437961	1.3376	0.181027	0.548424
ENSG00000006704	GTF2IRD1	166.082	0.514741	0.536907	0.958715	0.337702	0.70238
ENSG00000006712	PAF1	4191.85	0.690867	0.362815	1.90419	0.0568859	0.325192
ENSG00000006715	VPS41	2006.86	-0.0461071	0.336814	-0.136892	0.891116	0.969288
ENSG00000006740	ARHGAP44	80.4458	-0.283902	0.345309	-0.822169	0.410981	0.754555
ENSG00000006744	ELAC2	5040.83	0.153751	0.39017	0.394063	0.693535	0.903402
ENSG00000006747	SCIN	94.9728	-0.335041	0.483887	-0.692395	0.488689	0.806989
ENSG00000006756	ARSD	226.942	0.127778	0.269436	0.474243	0.635326	0.88115
ENSG00000006757	PNPLA4	546.845	0.131606	0.48651	0.270511	0.786767	0.936249
ENSG00000006831	ADIPOR2	3113.43	0.462677	0.251603	1.83892	0.0659276	0.348769
ENSG00000006837	CDKL3	145.993	0.165577	0.422851	0.391573	0.695373	0.904237
ENSG00000007001	UPP2	2.84856	-2.46808	1.86785	-1.32135	0.186386	NA
ENSG00000007038	PRSS21	321.085	0.428989	0.551182	0.778308	0.436388	0.773263
ENSG00000007047	MARK4	1203.86	-0.240484	0.282906	-0.85005	0.395297	0.744853
ENSG00000007062	PROM1	71.5041	-0.34744	0.659942	-0.52647	0.598562	0.866614
ENSG00000007080	CCDC124	4754.14	0.793335	0.612451	1.29535	0.195201	0.56556
ENSG00000007129	CEACAM21	1181.23	-0.0947861	0.219805	-0.431229	0.666302	0.894801
ENSG00000007168	PAFAH1B1	8074.22	-0.099887	0.18661	-0.535273	0.592461	0.864416
ENSG00000007171	NOS2	8.17282	-1.49459	0.991108	-1.508	0.131554	NA
ENSG00000007174	DNAH9	3.08945	-0.136944	1.58401	-0.0864544	0.931105	NA
ENSG00000007202	KIAA0100	8082.18	0.131999	0.349489	0.377691	0.70566	0.908302
ENSG00000007237	GAS7	149.598	0.169248	0.532402	0.317895	0.750565	0.924488
ENSG00000007255	TRAPPC6A	1939.61	-0.556378	0.38928	-1.42925	0.152933	0.509305
ENSG00000007264	MATK	2409.27	2.15908	0.760037	2.84076	0.00450065	0.075556
ENSG00000007312	CD79B	863.358	-1.27615	0.499174	-2.55651	0.0105727	0.12665
ENSG00000007314	SCN4A	7.82961	-0.353585	1.12987	-0.312943	0.754324	NA
ENSG00000007341	ST7L	477.121	-0.167431	0.197383	-0.848252	0.396298	0.745655
ENSG00000007350	TKTL1	90.7901	-3.697	0.899735	-4.10899	3.97394e-05	0.00244675
ENSG00000007372	PAX6	9.4614	1.4377	0.949901	1.51353	0.130145	0.475161
ENSG00000007376	RPUSD1	2196.71	0.153639	0.503019	0.305434	0.760035	0.928422
ENSG00000007384	RHBDF1	10.3816	-0.251476	0.684426	-0.367426	0.713301	0.911273
ENSG00000007392	LUC7L	5374.6	-0.00505976	0.309203	-0.0163639	0.986944	0.996794
ENSG00000007402	CACNA2D2	295.091	-0.928153	0.51751	-1.7935	0.0728934	0.365068
ENSG00000007516	BAIAP3	112.074	-0.928796	0.779447	-1.19161	0.233415	0.60939
ENSG00000007520	TSR3	4888.5	0.251591	0.441656	0.569654	0.568913	0.851151
ENSG00000007541	PIGQ	1727.41	0.185008	0.329184	0.56202	0.574102	0.853584
ENSG00000007545	CRAMP1	2186.99	-0.100048	0.265034	-0.37749	0.70581	0.908302
ENSG00000007866	TEAD3	61.6578	2.42124	0.944887	2.56247	0.0103931	0.125515
ENSG00000007908	SELE	2.13025	0.023284	2.28958	0.0101696	0.991886	NA
ENSG00000007923	DNAJC11	3308.98	0.247815	0.428145	0.57881	0.562717	0.847873
ENSG00000007933	FMO3	26.3105	-0.788004	0.567558	-1.38841	0.165012	0.528776
ENSG00000007944	MYLIP	1010.54	-0.431665	0.284011	-1.51989	0.128539	0.472789
ENSG00000007952	NOX1	44.7355	0.464839	0.38444	1.20913	0.226612	0.602346
ENSG00000007968	E2F2	1139.62	-0.626732	0.898168	-0.697789	0.485309	0.804653
ENSG00000008018	PSMB1	8280.4	1.0229	0.509643	2.00709	0.0447404	0.288323
ENSG00000008056	SYN1	32.9123	1.20564	0.795055	1.51642	0.129413	0.474444
ENSG00000008083	JARID2	2638.86	1.1937	0.26726	4.46645	7.95274e-06	0.00067977
ENSG00000008086	CDKL5	335.027	0.0917565	0.393621	0.233108	0.815677	0.944917
ENSG00000008118	CAMK1G	4.52355	2.54881	2.06399	1.23489	0.21687	NA
ENSG00000008128	CDK11A	4719.39	0.151318	0.243194	0.622211	0.533803	0.832473
ENSG00000008130	NADK	3399.31	0.569182	0.369428	1.54071	0.123387	0.46497
ENSG00000008226	DLEC1	311.972	-0.798391	0.653873	-1.22102	0.22208	0.597494
ENSG00000008256	CYTH3	637.586	0.246603	0.466342	0.528803	0.596942	0.866054
ENSG00000008277	ADAM22	154.798	-0.824389	0.291877	-2.82444	0.00473629	0.0781622
ENSG00000008282	SYPL1	2964.55	-0.390534	0.248782	-1.56978	0.116466	0.453436
ENSG00000008283	CYB561	858.831	0.0718861	0.391873	0.183442	0.854451	0.957851
ENSG00000008294	SPAG9	2595.1	0.421065	0.355689	1.1838	0.236492	0.612606
ENSG00000008300	CELSR3	677.2	0.681567	0.457597	1.48945	0.136369	0.485525
ENSG00000008311	AASS	80.9611	-0.687776	0.506558	-1.35775	0.174544	0.540317
ENSG00000008323	PLEKHG6	16.1895	-0.653982	0.673613	-0.970857	0.331619	0.696708
ENSG00000008324	SS18L2	1855.03	0.350276	0.319569	1.09609	0.27304	0.647752
ENSG00000008382	MPND	1157.75	-0.000218013	0.461476	-0.000472424	0.999623	1
ENSG00000008394	MGST1	81.5293	-0.366698	0.417682	-0.877936	0.379979	0.735472
ENSG00000008405	CRY1	1901.74	0.728314	0.325826	2.23528	0.0253987	0.215206
ENSG00000008438	PGLYRP1	7.85382	-0.395951	0.674575	-0.586964	0.557228	NA
ENSG00000008441	NFIX	719.319	2.33279	0.565068	4.12833	3.65405e-05	0.00227987
ENSG00000008513	ST3GAL1	7335.66	0.0668389	0.23555	0.283756	0.776597	0.934347
ENSG00000008516	MMP25	934.564	-0.368391	0.323278	-1.13955	0.254474	0.631048
ENSG00000008517	IL32	45402.7	0.118473	0.631361	0.187647	0.851154	0.955981
ENSG00000008710	PKD1	4390.66	-0.514392	0.233075	-2.20699	0.0273151	0.223256
ENSG00000008735	MAPK8IP2	43.2272	-0.0207997	0.647083	-0.0321437	0.974357	0.994947
ENSG00000008838	MED24	3874.81	-0.0486835	0.356253	-0.136654	0.891304	0.969288
ENSG00000008853	RHOBTB2	424.839	-0.711056	0.532241	-1.33597	0.181561	0.549153
ENSG00000008869	HEATR5B	2401.55	-0.949414	0.374263	-2.53676	0.0111884	0.131528
ENSG00000008952	SEC62	8880.49	0.273281	0.424253	0.644146	0.519481	0.824433
ENSG00000008988	RPS20	110503	-0.0200281	0.310811	-0.0644383	0.948621	0.987865
ENSG00000009307	CSDE1	29200.7	-0.119471	0.287538	-0.415496	0.677779	0.897584
ENSG00000009335	UBE3C	4744.03	0.524456	0.390106	1.34439	0.178821	0.546249
ENSG00000009413	REV3L	828.558	-0.0694511	0.344808	-0.20142	0.84037	0.952319
ENSG00000009694	TENM1	333.698	-1.05361	0.904433	-1.16494	0.244043	0.619532
ENSG00000009724	MASP2	309.921	-0.905903	0.695598	-1.30234	0.192801	0.562587
ENSG00000009765	IYD	47.9882	-0.207222	0.657064	-0.315375	0.752477	0.925457
ENSG00000009780	FAM76A	884.269	-0.729622	0.386675	-1.88691	0.0591725	0.330807
ENSG00000009790	TRAF3IP3	14884.7	-0.935026	0.360977	-2.59026	0.00959031	0.120382
ENSG00000009830	POMT2	523.047	0.515924	0.507018	1.01756	0.308885	0.678723
ENSG00000009844	VTA1	2378.06	0.291565	0.374594	0.77835	0.436363	0.773263
ENSG00000009950	MLXIPL	17.862	0.040546	0.529876	0.0765198	0.939006	0.984397
ENSG00000009954	BAZ1B	7369.56	0.146922	0.340745	0.431177	0.666339	0.894801
ENSG00000010017	RANBP9	3546.43	0.554161	0.287405	1.92815	0.0538363	0.317939
ENSG00000010030	ETV7	1056.86	6.17348	0.836604	7.37922	1.59221e-13	1.03206e-10
ENSG00000010072	SPRTN	612.047	0.460703	0.35173	1.30982	0.190257	0.559601
ENSG00000010165	METTL13	3478.78	0.442617	0.418667	1.05721	0.290418	0.66252
ENSG00000010219	DYRK4	750.611	0.0933599	0.252073	0.370368	0.711108	0.910442
ENSG00000010244	ZNF207	11982.6	0.691237	0.415815	1.66236	0.0964397	0.416569
ENSG00000010256	UQCRC1	6260.22	0.361516	0.519324	0.696127	0.486349	0.805347
ENSG00000010270	STARD3NL	1140.76	0.751738	0.239148	3.1434	0.00166996	0.0388519
ENSG00000010278	CD9	457.426	-1.25622	0.553918	-2.26788	0.0233365	0.205182
ENSG00000010292	NCAPD2	6402.9	-0.513435	0.588171	-0.872934	0.382699	0.735826
ENSG00000010295	IFFO1	2101.22	-0.882014	0.332967	-2.64895	0.00807422	0.109797
ENSG00000010310	GIPR	153.313	0.149226	0.333792	0.447063	0.65483	0.889122
ENSG00000010318	PHF7	357.2	-1.08126	0.357858	-3.02149	0.00251537	0.0513078
ENSG00000010319	SEMA3G	15.2779	-0.651919	0.698592	-0.933189	0.350723	0.71315
ENSG00000010322	NISCH	7446.2	-0.124976	0.204474	-0.61121	0.541061	0.836929
ENSG00000010327	STAB1	95.5315	-1.13583	0.684025	-1.66051	0.0968124	0.416608
ENSG00000010361	FUZ	800.612	-1.0053	0.378077	-2.65897	0.00783789	0.10784
ENSG00000010379	SLC6A13	9.03571	0.16197	0.7886	0.20539	0.837268	0.951173
ENSG00000010404	IDS	9592.39	-0.493734	0.34466	-1.43252	0.151995	0.507898
ENSG00000010438	PRSS3	7.12914	0.0911975	1.47278	0.0619219	0.950625	NA
ENSG00000010539	ZNF200	1492.61	0.111596	0.207302	0.538325	0.590353	0.863367
ENSG00000010610	CD4	16412	-1.11299	0.429399	-2.59196	0.009543	0.120111
ENSG00000010626	LRRC23	300.991	-0.521713	0.416529	-1.25253	0.210379	0.581426
ENSG00000010671	BTK	454.294	0.524742	0.522497	1.0043	0.315236	0.684027
ENSG00000010704	HFE	119.97	0.260953	0.590349	0.442032	0.658466	0.891362
ENSG00000010803	SCMH1	977.637	0.0574328	0.292053	0.196652	0.8441	0.953653
ENSG00000010810	FYN	17665.6	0.412228	0.186384	2.21172	0.026986	0.221814
ENSG00000010818	HIVEP2	6943.93	0.975719	0.340652	2.86427	0.00417973	0.0719048
ENSG00000010932	FMO1	1.28039	0.440651	2.72999	0.161411	0.87177	NA
ENSG00000011007	ELOA	3556.23	0.73637	0.518089	1.42132	0.155224	0.512931
ENSG00000011009	LYPLA2	5263.46	0.530767	0.502658	1.05592	0.291005	0.662821
ENSG00000011021	CLCN6	824.855	0.0685807	0.300658	0.228102	0.819567	0.94578
ENSG00000011028	MRC2	569.444	0.336364	0.611831	0.549766	0.58248	0.858323
ENSG00000011052	NME1-NME2	1047.86	3.43755	0.886556	3.87741	0.000105572	0.00508994
ENSG00000011105	TSPAN9	77.0279	-0.324458	0.488364	-0.664377	0.506449	0.816839
ENSG00000011114	BTBD7	1412.56	-0.123851	0.234946	-0.527147	0.598092	0.866504
ENSG00000011132	APBA3	3077.13	0.491954	0.258017	1.90667	0.0565632	0.3243
ENSG00000011143	MKS1	912.473	-0.660907	0.216116	-3.05811	0.00222738	0.0474665
ENSG00000011198	ABHD5	683.81	0.868838	0.45158	1.924	0.054355	0.319028
ENSG00000011201	ANOS1	44.8853	-0.441115	0.876954	-0.503008	0.614959	0.872843
ENSG00000011243	AKAP8L	4463.85	-0.415387	0.334682	-1.24114	0.214555	0.586679
ENSG00000011258	MBTD1	1677.12	-0.28678	0.566978	-0.505805	0.612994	0.871567
ENSG00000011260	UTP18	3274.79	0.714808	0.291473	2.45239	0.0141909	0.153379
ENSG00000011275	RNF216	8075.17	-0.0082934	0.343901	-0.0241156	0.98076	0.996367
ENSG00000011295	TTC19	2466.57	0.236562	0.150552	1.5713	0.116113	0.452639
ENSG00000011304	PTBP1	29475.4	0.56672	0.503457	1.12566	0.260311	0.63605
ENSG00000011332	DPF1	35.6935	-0.364292	0.855042	-0.426052	0.67007	0.895208
ENSG00000011347	SYT7	6.50059	2.02719	2.02294	1.0021	0.316295	NA
ENSG00000011376	LARS2	1188	0.637725	0.460999	1.38335	0.166556	0.530798
ENSG00000011405	PIK3C2A	1233.39	-0.0754513	0.384257	-0.196356	0.844331	0.953653
ENSG00000011422	PLAUR	255.458	0.507217	0.333577	1.52054	0.128375	0.472348
ENSG00000011426	ANLN	437.259	0.182293	1.18504	0.153828	0.877745	0.964692
ENSG00000011451	WIZ	2865.93	0.627622	0.407895	1.53869	0.123881	0.466022
ENSG00000011454	RABGAP1	1801.65	-0.019029	0.357075	-0.0532913	0.9575	0.990393
ENSG00000011465	DCN	10.1121	-0.486295	1.22578	-0.396723	0.691572	0.902664
ENSG00000011478	QPCTL	817.975	0.100324	0.241169	0.415988	0.677419	0.897548
ENSG00000011485	PPP5C	3877.78	0.512035	0.562356	0.910517	0.36255	0.722009
ENSG00000011523	CEP68	1985.84	-1.2711	0.560587	-2.26745	0.0233627	0.205182
ENSG00000011566	MAP4K3	470.103	-0.0244228	0.242737	-0.100614	0.919857	0.978981
ENSG00000011590	ZBTB32	544.618	0.530649	0.90708	0.585008	0.558542	0.846512
ENSG00000011600	TYROBP	336.186	-0.383078	0.603864	-0.634378	0.525834	0.828056
ENSG00000011638	TMEM159	621.88	-0.969325	0.237932	-4.07396	4.62195e-05	0.0027167
ENSG00000011677	GABRA3	2.36994	-0.659779	1.24502	-0.529933	0.596159	NA
ENSG00000012048	BRCA1	750.909	-0.34967	0.736818	-0.474568	0.635095	0.8809
ENSG00000012061	ERCC1	3108.78	0.938036	0.495553	1.89291	0.0583703	0.328923
ENSG00000012124	CD22	98.6316	-0.138647	0.444865	-0.311662	0.755298	0.926844
ENSG00000012171	SEMA3B	30.885	-0.69148	0.685425	-1.00883	0.313054	0.682109
ENSG00000012174	MBTPS2	447.58	0.307248	0.394226	0.779372	0.435761	0.772591
ENSG00000012211	PRICKLE3	467.74	-0.312375	0.364456	-0.857098	0.391391	0.741323
ENSG00000012223	LTF	21.803	-0.847537	0.791329	-1.07103	0.284156	0.658226
ENSG00000012232	EXTL3	1293.11	-0.467592	0.36285	-1.28866	0.197515	0.567994
ENSG00000012504	NR1H4	3.2748	-2.14683	1.2645	-1.69777	0.0895508	NA
ENSG00000012660	ELOVL5	5765.1	0.436729	0.204702	2.13348	0.0328851	0.245764
ENSG00000012779	ALOX5	535.542	0.926597	0.526471	1.76002	0.078405	0.379581
ENSG00000012817	KDM5D	1975.33	-0.231341	0.344965	-0.67062	0.502462	0.814799
ENSG00000012822	CALCOCO1	3016.96	-0.958329	0.495655	-1.93346	0.0531796	0.315682
ENSG00000012963	UBR7	2135.38	-0.322256	0.421356	-0.764807	0.444386	0.778436
ENSG00000012983	MAP4K5	1201.15	-0.288002	0.395621	-0.727976	0.466628	0.7938
ENSG00000013016	EHD3	213.116	-0.903056	0.41237	-2.18991	0.0285304	0.228233
ENSG00000013275	PSMC4	5976.4	1.13759	0.509059	2.2347	0.0254374	0.215358
ENSG00000013288	MAN2B2	3409.29	-0.542868	0.273694	-1.98348	0.0473136	0.296393
ENSG00000013293	SLC7A14	41.5604	0.341604	0.404257	0.845018	0.398101	0.746128
ENSG00000013297	CLDN11	30.534	-0.356476	0.446221	-0.798879	0.424361	0.764381
ENSG00000013306	SLC25A39	8094.17	0.471634	0.490029	0.962461	0.335818	0.700241
ENSG00000013364	MVP	10302.1	0.328458	0.537691	0.610868	0.541287	0.836929
ENSG00000013374	NUB1	5470.83	0.474447	0.156039	3.04057	0.00236134	0.0494086
ENSG00000013375	PGM3	963.576	-0.218044	0.520002	-0.419314	0.674987	0.896928
ENSG00000013392	RWDD2A	398.619	-0.976007	0.543257	-1.79659	0.0724015	0.363615
ENSG00000013441	CLK1	17779	-0.34956	0.75584	-0.462479	0.643738	0.884238
ENSG00000013503	POLR3B	677.625	0.438181	0.404077	1.0844	0.278187	0.652612
ENSG00000013523	ANGEL1	1691.77	-0.0133323	0.238164	-0.0559793	0.955358	0.990137
ENSG00000013561	RNF14	1574.26	0.140192	0.265173	0.52868	0.597027	0.866054
ENSG00000013563	DNASE1L1	1003.49	-0.845827	0.33348	-2.53637	0.011201	0.131542
ENSG00000013573	DDX11	3203.14	-0.691635	0.446977	-1.54736	0.121776	0.462312
ENSG00000013583	HEBP1	1139.26	-0.731465	0.300378	-2.43515	0.0148855	0.157387
ENSG00000013588	GPRC5A	119.18	0.388126	0.424863	0.913532	0.360963	0.721259
ENSG00000013619	MAMLD1	120.863	2.09424	0.716508	2.92285	0.00346848	0.0638808
ENSG00000013725	CD6	28299.6	0.299358	0.36181	0.82739	0.408016	0.752797
ENSG00000013810	TACC3	11006.7	-0.556866	0.349778	-1.59206	0.111372	0.444022
ENSG00000014123	UFL1	2460.46	-0.250969	0.544289	-0.461095	0.644731	0.884727
ENSG00000014138	POLA2	2233.75	0.141662	0.572786	0.24732	0.804661	0.941374
ENSG00000014164	ZC3H3	2058.32	0.0217973	0.362862	0.0600707	0.952099	0.989367
ENSG00000014216	CAPN1	5481.2	-0.454936	0.419904	-1.08343	0.278619	0.652864
ENSG00000014257	ACPP	24.216	0.933002	0.567934	1.6428	0.100425	0.422921
ENSG00000014641	MDH1	5430.75	0.393964	0.321676	1.22472	0.220679	0.595405
ENSG00000014824	SLC30A9	1980.54	-0.110857	0.485999	-0.228101	0.819568	0.94578
ENSG00000014914	MTMR11	36.9963	0.557548	0.701375	0.794936	0.426651	0.765681
ENSG00000014919	COX15	1551.31	-0.16545	0.193645	-0.854396	0.392885	0.742707
ENSG00000015133	CCDC88C	6912.38	-0.410947	0.227102	-1.80952	0.0703697	0.359044
ENSG00000015153	YAF2	1435.67	0.592014	0.284154	2.08343	0.0372123	0.260653
ENSG00000015171	ZMYND11	3020.52	-0.267423	0.363927	-0.734827	0.462445	0.790793
ENSG00000015285	WAS	5656.59	-0.532661	0.367534	-1.44928	0.147258	0.50152
ENSG00000015475	BID	1794.01	0.484989	0.444081	1.09212	0.27478	0.649733
ENSG00000015479	MATR3	17319.6	0.462041	0.530826	0.870418	0.384072	0.736399
ENSG00000015520	NPC1L1	20.6567	0.0814985	1.02803	0.0792761	0.936813	0.984227
ENSG00000015532	XYLT2	2267.9	-0.3846	0.208708	-1.84277	0.0653632	0.34738
ENSG00000015568	RGPD5	1024.87	0.535572	0.598851	0.894334	0.371143	0.72809
ENSG00000015592	STMN4	11.4298	-1.09784	0.695304	-1.57894	0.11435	0.4495
ENSG00000015676	NUDCD3	5029.01	-0.191451	0.356377	-0.537213	0.59112	0.863786
ENSG00000016391	CHDH	112.831	-0.137421	0.583554	-0.23549	0.813829	0.94431
ENSG00000016602	CLCA4	2.43887	-3.89038	2.21569	-1.75584	0.0791165	NA
ENSG00000016864	GLT8D1	1964.56	-0.310861	0.190174	-1.63461	0.102131	0.426567
ENSG00000017260	ATP2C1	2747.37	0.263374	0.243772	1.08041	0.279958	0.653804
ENSG00000017427	IGF1	2.26696	3.34445	2.50495	1.33514	0.181831	NA
ENSG00000017483	SLC38A5	3059.63	1.33717	0.815161	1.64037	0.100928	0.424425
ENSG00000017797	RALBP1	4472.93	-0.21025	0.180228	-1.16658	0.24338	0.618658
ENSG00000018189	RUFY3	664.439	-0.426081	0.301181	-1.4147	0.157157	0.515579
ENSG00000018236	CNTN1	12.5938	0.633227	1.17453	0.539131	0.589796	0.863202
ENSG00000018280	SLC11A1	89.8521	-1.21089	0.562704	-2.15192	0.0314039	0.240178
ENSG00000018408	WWTR1	60.7952	0.762493	0.489142	1.55884	0.119034	0.458117
ENSG00000018510	AGPS	2463.18	0.390452	0.60558	0.644756	0.519085	0.82406
ENSG00000018610	CXorf56	1536.13	0.479702	0.246207	1.94837	0.0513713	0.310315
ENSG00000018625	ATP1A2	3.82667	0.661519	1.18271	0.559327	0.575938	NA
ENSG00000018699	TTC27	1688.96	0.798386	0.345707	2.30943	0.0209196	0.193177
ENSG00000018869	ZNF582	219.681	0.227187	0.41198	0.551451	0.581325	0.858069
ENSG00000019102	VSIG2	27.2859	-1.44281	0.74035	-1.94882	0.0513173	0.31007
ENSG00000019144	PHLDB1	287.475	2.42465	0.347659	6.97422	3.07565e-12	1.49521e-09
ENSG00000019169	MARCO	9.52736	-0.101564	1.42834	-0.0711059	0.943313	0.985901
ENSG00000019186	CYP24A1	15.1559	0.121876	0.756092	0.161192	0.871942	0.96337
ENSG00000019485	PRDM11	391.474	0.149566	0.402797	0.371318	0.710401	0.910185
ENSG00000019505	SYT13	5.74676	-0.575745	0.915458	-0.628915	0.529405	NA
ENSG00000019582	CD74	25495.5	1.36062	0.602998	2.25643	0.0240434	0.2088
ENSG00000019991	HGF	53.4884	2.57013	0.697794	3.68322	0.000230304	0.00939537
ENSG00000019995	ZRANB1	2082.17	-0.2544	0.33375	-0.762247	0.445913	0.779194
ENSG00000020129	NCDN	2016.74	0.316391	0.480488	0.658479	0.51023	0.818748
ENSG00000020181	ADGRA2	15.8152	-1.32939	0.605852	-2.19424	0.028218	0.227291
ENSG00000020219	CCT8L1P	1.07524	0.241961	2.11026	0.114659	0.908715	NA
ENSG00000020256	ZFP64	723.163	-0.349665	0.188082	-1.8591	0.0630126	0.342273
ENSG00000020426	MNAT1	575.674	0.631188	0.469436	1.34457	0.178765	0.546148
ENSG00000020577	SAMD4A	459.753	3.90647	0.455244	8.58105	9.40112e-18	1.6875e-14
ENSG00000020633	RUNX3	18435.6	1.07809	0.489164	2.20395	0.027528	0.224055
ENSG00000020922	MRE11	2134.2	-0.420023	0.585547	-0.717317	0.473179	0.798253
ENSG00000021300	PLEKHB1	2619.99	-1.03005	0.467354	-2.20399	0.0275248	0.224055
ENSG00000021355	SERPINB1	5895.76	-0.146795	0.474721	-0.309223	0.757152	0.927375
ENSG00000021461	CYP3A43	13.9097	-0.745921	0.825256	-0.903866	0.366066	0.723789
ENSG00000021488	SLC7A9	35.2174	-1.41908	0.672709	-2.10949	0.034902	0.253246
ENSG00000021574	SPAST	1214.08	-0.289656	0.45395	-0.638079	0.523422	0.826895
ENSG00000021645	NRXN3	15.1794	-0.653927	1.21711	-0.537279	0.591075	0.863774
ENSG00000021762	OSBPL5	709	-0.491945	0.452079	-1.08818	0.276514	0.651467
ENSG00000021776	AQR	2938.04	0.344388	0.311178	1.10672	0.268415	0.643065
ENSG00000021826	CPS1	35.132	-0.987349	0.493375	-2.00121	0.0453695	0.28993
ENSG00000022267	FHL1	1180.43	0.138452	0.264385	0.523677	0.600503	0.867096
ENSG00000022277	RTF2	5130.34	0.362038	0.333292	1.08625	0.277369	0.65202
ENSG00000022355	GABRA1	2.77193	0.755928	1.48207	0.51005	0.610016	NA
ENSG00000022556	NLRP2	668.392	0.313463	0.428218	0.732017	0.464158	0.791981
ENSG00000022567	SLC45A4	1621.16	1.11423	0.318518	3.49816	0.000468473	0.0157066
ENSG00000022840	RNF10	7675.04	0.147207	0.211297	0.696682	0.486002	0.805092
ENSG00000022976	ZNF839	1437.74	-0.0784675	0.164038	-0.478349	0.632402	0.880155
ENSG00000023041	ZDHHC6	2853.9	-0.0918575	0.23187	-0.396159	0.691988	0.902672
ENSG00000023171	GRAMD1B	781.261	-0.161197	0.523271	-0.308057	0.758039	0.927945
ENSG00000023191	RNH1	9788.58	0.772037	0.397251	1.94345	0.0519621	0.31172
ENSG00000023228	NDUFS1	3848	0.292322	0.376805	0.77579	0.437873	0.774229
ENSG00000023287	RB1CC1	1879.74	-0.0981034	0.686852	-0.14283	0.886424	0.967985
ENSG00000023318	ERP44	2428.36	0.439472	0.181023	2.42771	0.0151946	0.159643
ENSG00000023330	ALAS1	2076.53	0.329817	0.435007	0.758188	0.448339	0.78127
ENSG00000023445	BIRC3	12861.7	1.19961	0.531758	2.25594	0.0240745	0.20884
ENSG00000023516	AKAP11	3308.92	0.0194328	0.485217	0.0400498	0.968053	0.993068
ENSG00000023572	GLRX2	2005.79	-0.395603	0.528085	-0.749128	0.45378	0.785531
ENSG00000023608	SNAPC1	724.632	0.601599	0.453848	1.32555	0.184988	0.552731
ENSG00000023697	DERA	838.502	-0.462553	0.503867	-0.918006	0.358616	0.719327
ENSG00000023734	STRAP	5336.52	1.06468	0.421823	2.524	0.0116029	0.134916
ENSG00000023839	ABCC2	195.495	-1.15428	0.548578	-2.10413	0.0353672	0.254604
ENSG00000023892	DEF6	14853.9	-0.742872	0.263793	-2.81612	0.00486074	0.0794775
ENSG00000023902	PLEKHO1	7831.05	-0.485761	0.395122	-1.22939	0.218924	0.592643
ENSG00000023909	GCLM	1609.59	1.04743	0.339508	3.08513	0.00203466	0.0447913
ENSG00000024048	UBR2	3041.29	0.0107601	0.334571	0.0321608	0.974344	0.994947
ENSG00000024422	EHD2	85.7381	-0.815259	0.657902	-1.23918	0.215279	0.58809
ENSG00000024526	DEPDC1	97.4679	0.703602	1.64304	0.428232	0.668482	0.895056
ENSG00000024862	CCDC28A	1341.85	-0.713725	0.330044	-2.16252	0.0305783	0.236901
ENSG00000025039	RRAGD	769.312	0.0688059	0.412072	0.166976	0.867389	0.961728
ENSG00000025156	HSF2	1535.89	-0.31163	0.364585	-0.854751	0.392689	0.742517
ENSG00000025293	PHF20	3133.46	0.0362621	0.175737	0.206343	0.836523	0.950793
ENSG00000025423	HSD17B6	53.9612	-2.11245	0.52588	-4.01698	5.89478e-05	0.00333871
ENSG00000025434	NR1H3	408.612	-0.620824	0.264524	-2.34694	0.0189282	0.183426
ENSG00000025708	TYMP	10415.1	3.71315	0.892246	4.16158	3.16058e-05	0.00207169
ENSG00000025770	NCAPH2	5795.97	0.88148	0.497273	1.77263	0.07629	0.373213
ENSG00000025772	TOMM34	2222.4	1.22149	0.659912	1.85099	0.0641708	0.344394
ENSG00000025796	SEC63	3815.37	0.377267	0.325333	1.15963	0.246198	0.622131
ENSG00000025800	KPNA6	5578.68	0.328588	0.248991	1.31968	0.186943	0.554828
ENSG00000026025	VIM	45189.3	0.0814584	0.367069	0.221916	0.824379	0.94735
ENSG00000026036	RTEL1-TNFRSF6B	492.185	-0.0749826	0.426879	-0.175653	0.860566	0.95936
ENSG00000026103	FAS	1136.44	2.16851	0.54336	3.99092	6.58171e-05	0.00361375
ENSG00000026297	RNASET2	9388.73	-0.809101	0.358109	-2.25937	0.0238603	0.207909
ENSG00000026508	CD44	31954.6	0.219937	0.322472	0.682035	0.495217	0.809806
ENSG00000026559	KCNG1	28.5517	-1.52357	0.58316	-2.61262	0.00898513	0.116372
ENSG00000026652	AGPAT4	206.101	0.418423	0.458144	0.913302	0.361084	0.721259
ENSG00000026751	SLAMF7	703.417	2.04992	0.499974	4.10006	4.13046e-05	0.00250909
ENSG00000026950	BTN3A1	8558.06	-0.407582	0.606288	-0.672258	0.50142	0.813979
ENSG00000027001	MIPEP	540.039	-0.400187	0.370396	-1.08043	0.279951	0.653804
ENSG00000027075	PRKCH	11701.3	-0.135401	0.120652	-1.12224	0.26176	0.637176
ENSG00000027644	INSRR	3.67198	3.61644	1.82206	1.98481	0.047166	NA
ENSG00000027697	IFNGR1	1561.47	-0.135567	0.463872	-0.29225	0.770095	0.931821
ENSG00000027847	B4GALT7	1385.46	0.52868	0.293035	1.80415	0.0712073	0.360282
ENSG00000027869	SH2D2A	7151.22	2.94598	0.777114	3.79092	0.00015009	0.00658335
ENSG00000028116	VRK2	687.653	0.663226	0.497915	1.33201	0.182858	0.550503
ENSG00000028137	TNFRSF1B	12637.5	1.44527	0.599313	2.41154	0.0158853	0.164203
ENSG00000028203	VEZT	1632.82	0.108314	0.380651	0.284549	0.77599	0.934235
ENSG00000028277	POU2F2	4729.89	0.536412	0.237335	2.26014	0.0238123	0.207724
ENSG00000028310	BRD9	3895.52	0.322414	0.190145	1.69563	0.0899569	0.403862
ENSG00000028528	SNX1	6649.13	0.226969	0.244343	0.928895	0.352943	0.715235
ENSG00000028839	TBPL1	1284.76	0.351244	0.227358	1.54489	0.122372	0.463039
ENSG00000029153	ARNTL2	294.204	0.85349	0.842271	1.01332	0.310907	0.680329
ENSG00000029363	BCLAF1	8445.16	0.272288	0.505886	0.538241	0.590411	0.863398
ENSG00000029364	SLC39A9	2437.84	0.229753	0.226576	1.01402	0.310573	0.67998
ENSG00000029534	ANK1	438.197	-0.122072	0.428627	-0.284797	0.7758	0.934187
ENSG00000029639	TFB1M	702.637	0.0484132	0.275043	0.176021	0.860278	0.95936
ENSG00000029725	RABEP1	3783.47	0.375914	0.326737	1.15051	0.249935	0.626269
ENSG00000029993	HMGB3	558.135	0.56266	0.81501	0.690371	0.489961	0.808177
ENSG00000030066	NUP160	4105.01	0.257259	0.222366	1.15692	0.247305	0.622793
ENSG00000030110	BAK1	3116.17	0.468118	0.544658	0.859471	0.390081	0.740358
ENSG00000030419	IKZF2	793.945	0.270049	0.386598	0.698526	0.484848	0.804353
ENSG00000030582	GRN	2050.29	-0.42944	0.408916	-1.05019	0.293631	0.665166
ENSG00000031003	FAM13B	2230.21	-0.0336865	0.430128	-0.0783173	0.937576	0.984227
ENSG00000031081	ARHGAP31	841.334	1.36274	0.517324	2.6342	0.00843357	0.112464
ENSG00000031691	CENPQ	424.412	-0.384367	0.612377	-0.627664	0.530224	0.830109
ENSG00000031698	SARS	10750.4	1.06069	0.335053	3.16572	0.00154697	0.0369862
ENSG00000031823	RANBP3	5449.17	-0.120954	0.301154	-0.401635	0.687953	0.901875
ENSG00000032219	ARID4A	2822.94	-0.577986	0.731801	-0.789812	0.429637	0.767804
ENSG00000032389	EIPR1	1594.8	0.120074	0.483593	0.248295	0.803906	0.941252
ENSG00000032444	PNPLA6	5862.31	-0.0401816	0.318517	-0.126152	0.899611	0.97164
ENSG00000032742	IFT88	431.218	-0.283119	0.595939	-0.47508	0.63473	0.880837
ENSG00000033011	ALG1	1932.64	0.451188	0.513448	0.878742	0.379541	0.734865
ENSG00000033030	ZCCHC8	2520.41	-0.0578907	0.288003	-0.201007	0.840693	0.952355
ENSG00000033050	ABCF2	4797.87	1.69217	0.605548	2.79445	0.00519877	0.0827787
ENSG00000033100	CHPF2	3022.6	0.746667	0.284974	2.62013	0.00878973	0.115059
ENSG00000033122	LRRC7	99.4506	-0.365787	0.643408	-0.568514	0.569686	0.8515
ENSG00000033170	FUT8	1821.77	-0.0131023	0.43924	-0.0298295	0.976203	0.995099
ENSG00000033178	UBA6	2571.25	0.32213	0.63505	0.50725	0.611979	0.871402
ENSG00000033327	GAB2	518.345	-0.274057	0.289082	-0.948026	0.343116	0.706156
ENSG00000033627	ATP6V0A1	667.031	-0.194915	0.291447	-0.668785	0.503633	0.815675
ENSG00000033800	PIAS1	3143.53	0.0687739	0.212423	0.323759	0.746121	0.92277
ENSG00000033867	SLC4A7	2663.03	-0.421406	0.446327	-0.944164	0.345086	0.707546
ENSG00000034053	APBA2	4934.83	-1.04815	0.517362	-2.02595	0.0427701	0.280851
ENSG00000034152	MAP2K3	5897.87	1.97506	0.583073	3.38733	0.00070576	0.0212776
ENSG00000034239	EFCAB1	8.63292	-0.885065	0.786085	-1.12591	0.260202	0.63605
ENSG00000034510	TMSB10	74381.5	0.966317	0.54362	1.77756	0.0754762	0.370865
ENSG00000034533	ASTE1	982.137	-0.554569	0.221158	-2.50757	0.0121565	0.139253
ENSG00000034677	RNF19A	4805.66	1.29789	0.562186	2.30866	0.0209627	0.193269
ENSG00000034693	PEX3	780.166	0.287388	0.316382	0.908361	0.363688	0.722558
ENSG00000034713	GABARAPL2	3469.17	-0.227373	0.165681	-1.37236	0.169951	0.534928
ENSG00000035115	SH3YL1	2697.88	-0.650903	0.549863	-1.18375	0.23651	0.612606
ENSG00000035141	FAM136A	3226.82	-0.196822	0.50608	-0.388914	0.69734	0.904541
ENSG00000035403	VCL	946.881	0.162801	0.333516	0.488136	0.625454	0.876837
ENSG00000035499	DEPDC1B	229.033	0.214083	0.88269	0.242535	0.808366	0.942277
ENSG00000035664	DAPK2	193.162	-0.66252	0.321551	-2.06039	0.0393613	0.269447
ENSG00000035681	NSMAF	3059.01	0.0267967	0.160291	0.167176	0.867232	0.961609
ENSG00000035687	ADSS	3807.94	0.143014	0.423094	0.33802	0.735348	0.919284
ENSG00000035720	STAP1	373.935	1.46044	0.408311	3.57678	0.000347851	0.012683
ENSG00000035862	TIMP2	496.502	-1.55098	0.402661	-3.85183	0.000117241	0.00548259
ENSG00000035928	RFC1	3863.1	0.484742	0.422128	1.14833	0.250833	0.627284
ENSG00000036054	TBC1D23	1563.63	0.00457965	0.541151	0.0084628	0.993248	0.998712
ENSG00000036257	CUL3	4322	0.34471	0.334832	1.0295	0.303245	0.673989
ENSG00000036448	MYOM2	197.756	-0.801594	0.307555	-2.60634	0.00915147	0.117464
ENSG00000036530	CYP46A1	299.832	-0.276663	0.482856	-0.572972	0.566664	0.849486
ENSG00000036549	AC118549.1	2355.72	0.00847256	0.448786	0.0188789	0.984938	0.996507
ENSG00000036565	SLC18A1	2.1397	1.98975	1.71034	1.16337	0.244681	NA
ENSG00000036672	USP2	17.4825	0.209523	0.85431	0.245254	0.80626	0.941704
ENSG00000036828	CASR	95.5851	0.412441	0.3766	1.09517	0.273442	0.64815
ENSG00000037042	TUBG2	516.206	-0.652611	0.278507	-2.34324	0.0191168	0.184212
ENSG00000037241	RPL26L1	1286.87	0.833253	0.547756	1.52121	0.128206	0.472323
ENSG00000037280	FLT4	309.644	-0.594058	0.406459	-1.46155	0.143866	0.49664
ENSG00000037474	NSUN2	6552.42	0.468564	0.293015	1.59911	0.109796	0.441053
ENSG00000037637	FBXO42	1883.14	-0.170273	0.164773	-1.03338	0.301426	0.672707
ENSG00000037749	MFAP3	519.843	0.073326	0.400836	0.182933	0.854851	0.957992
ENSG00000037757	MRI1	2507.73	-0.936113	0.283994	-3.29624	0.000979889	0.0267491
ENSG00000037897	METTL1	1144.78	2.73322	0.673218	4.05993	4.9088e-05	0.00284943
ENSG00000038002	AGA	1089.35	-0.0584071	0.170836	-0.34189	0.732434	0.91757
ENSG00000038210	PI4K2B	1908.12	0.280138	0.57421	0.487867	0.625644	0.876865
ENSG00000038219	BOD1L1	4392.22	0.0304688	0.559935	0.0544149	0.956605	0.990213
ENSG00000038274	MAT2B	8984.97	0.2076	0.229235	0.905621	0.365136	0.723455
ENSG00000038295	TLL1	1.01711	2.56457	2.54126	1.00917	0.312891	NA
ENSG00000038358	EDC4	6593.06	0.387659	0.303966	1.27534	0.20219	0.572017
ENSG00000038382	TRIO	283.467	0.403693	0.373943	1.07956	0.28034	0.653933
ENSG00000038427	VCAN	25.0766	0.607065	0.719273	0.843999	0.39867	0.746144
ENSG00000038532	CLEC16A	2242.48	0.715372	0.375643	1.90439	0.056859	0.325192
ENSG00000038945	MSR1	27.0719	-0.0633063	0.433301	-0.146102	0.883841	0.967247
ENSG00000039068	CDH1	98.0883	0.423692	0.465205	0.910765	0.362419	0.722009
ENSG00000039123	MTREX	3715.28	0.431145	0.50191	0.859009	0.390335	0.740549
ENSG00000039139	DNAH5	2.94714	1.26377	1.32894	0.950967	0.341621	NA
ENSG00000039319	ZFYVE16	807.897	-0.128422	0.62339	-0.206006	0.836787	0.950931
ENSG00000039523	RIPOR1	1446.08	-0.147653	0.297169	-0.496867	0.619283	0.874717
ENSG00000039560	RAI14	47.436	1.16919	0.539632	2.16663	0.0302627	0.235315
ENSG00000039600	SOX30	26.6033	0.666018	0.720207	0.924759	0.355091	0.716724
ENSG00000039650	PNKP	2164.23	0.185616	0.348915	0.531982	0.594738	0.865376
ENSG00000039987	BEST2	24.7455	0.191273	0.585318	0.326784	0.743831	0.922034
ENSG00000040199	PHLPP2	763.656	0.190861	0.391363	0.487681	0.625776	0.876895
ENSG00000040275	SPDL1	849.809	-0.0246609	0.700601	-0.0351995	0.971921	0.994429
ENSG00000040341	STAU2	1025.09	-0.313417	0.294693	-1.06354	0.287538	0.66046
ENSG00000040487	PQLC2	348.033	-0.806339	0.384765	-2.09566	0.0361119	0.257383
ENSG00000040531	CTNS	995.345	0.134063	0.391112	0.342775	0.731768	0.91757
ENSG00000040608	RTN4R	200.941	-2.20027	0.338814	-6.49402	8.35735e-11	3.25031e-08
ENSG00000040633	PHF23	2561.21	0.0378116	0.388767	0.0972603	0.92252	0.979435
ENSG00000040731	CDH10	1.79059	-1.20125	1.93223	-0.621691	0.534145	NA
ENSG00000040933	INPP4A	5104.97	-0.890483	0.271314	-3.28212	0.00103031	0.0276985
ENSG00000041353	RAB27B	223.76	0.92172	0.622981	1.47953	0.138998	0.488704
ENSG00000041357	PSMA4	7063.87	1.43749	0.513948	2.79697	0.00515851	0.0823739
ENSG00000041515	MYO16	30.0007	0.550405	0.77873	0.706798	0.479692	0.801758
ENSG00000041802	LSG1	3087.27	0.436159	0.239424	1.8217	0.0684999	0.354344
ENSG00000041880	PARP3	690.891	0.55823	0.408663	1.36599	0.171941	0.536834
ENSG00000041982	TNC	21.4406	1.27218	0.546275	2.32882	0.0198685	0.188295
ENSG00000041988	THAP3	1203.63	-0.212189	0.303011	-0.700271	0.483758	0.803993
ENSG00000042062	RIPOR3	216.63	0.595159	0.431465	1.37939	0.167774	0.532231
ENSG00000042088	TDP1	2555.25	-0.0561348	0.440143	-0.127538	0.898515	0.971094
ENSG00000042286	AIFM2	563.601	-0.677503	0.366481	-1.84867	0.0645051	0.344876
ENSG00000042304	C2orf83	12.4868	-0.344904	0.65683	-0.525105	0.599511	0.866875
ENSG00000042317	SPATA7	115.283	-0.77869	0.506374	-1.53778	0.124103	0.46613
ENSG00000042429	MED17	2551.55	0.124515	0.239808	0.519228	0.603602	0.868121
ENSG00000042445	RETSAT	1322.53	-0.76604	0.313015	-2.44729	0.0143933	0.154475
ENSG00000042493	CAPG	1413.63	-0.0344089	0.370715	-0.0928177	0.926048	0.980816
ENSG00000042753	AP2S1	2852.03	0.406623	0.532319	0.763869	0.444945	0.778746
ENSG00000042781	USH2A	1.64688	-4.6987	2.18141	-2.15398	0.0312421	NA
ENSG00000042832	TG	46.1288	-0.0317811	0.758878	-0.0418791	0.966595	0.992454
ENSG00000042980	ADAM28	149.871	-0.256666	0.738024	-0.347774	0.72801	0.916948
ENSG00000043039	BARX2	16.1373	0.1459	0.889406	0.164042	0.869698	0.962686
ENSG00000043093	DCUN1D1	1480.17	-0.00118868	0.486987	-0.00244089	0.998052	0.999883
ENSG00000043143	JADE2	9109.32	-0.160727	0.325286	-0.49411	0.621228	0.875399
ENSG00000043462	LCP2	16305.3	0.670013	0.284362	2.35619	0.0184632	0.180494
ENSG00000043514	TRIT1	877.803	0.261622	0.240708	1.08689	0.277087	0.65182
ENSG00000043591	ADRB1	9.40611	-0.217186	0.6524	-0.332904	0.739207	0.920972
ENSG00000044090	CUL7	1271.02	-0.132502	0.284408	-0.465886	0.641297	0.883547
ENSG00000044115	CTNNA1	1446.48	0.630054	0.535939	1.17561	0.239752	0.615267
ENSG00000044446	PHKA2	2075.08	-0.323435	0.237257	-1.36323	0.17281	0.5381
ENSG00000044459	CNTLN	59.92	0.457203	0.470188	0.972382	0.33086	0.696083
ENSG00000044574	HSPA5	29223.8	1.47767	0.379196	3.89684	9.74541e-05	0.00483285
ENSG00000046604	DSG2	62.0534	-0.0825127	0.411679	-0.20043	0.841144	0.952355
ENSG00000046647	GEMIN8	652.283	0.469605	0.340345	1.37979	0.167651	0.53215
ENSG00000046651	OFD1	3150.27	0.159198	0.615644	0.258588	0.795953	0.938757
ENSG00000046653	GPM6B	136.02	-0.159387	0.701775	-0.22712	0.82033	0.945852
ENSG00000046889	PREX2	14.6359	1.11784	0.695586	1.60704	0.108045	0.438274
ENSG00000047056	WDR37	2814.21	-0.627583	0.271053	-2.31536	0.0205934	0.192169
ENSG00000047188	YTHDC2	2584.53	0.135101	0.518608	0.260507	0.794473	0.938727
ENSG00000047230	CTPS2	390.889	-0.391974	0.381457	-1.02757	0.304153	0.674723
ENSG00000047249	ATP6V1H	1542.8	0.474206	0.222785	2.12854	0.0332926	0.2471
ENSG00000047315	POLR2B	6450.83	0.00839972	0.287068	0.0292604	0.976657	0.995253
ENSG00000047346	FAM214A	2285.57	-1.34809	0.797738	-1.68989	0.0910481	0.406178
ENSG00000047365	ARAP2	2176.43	1.76377	0.607308	2.90425	0.00368135	0.0665586
ENSG00000047410	TPR	4851.71	0.810675	0.398263	2.03553	0.0417979	0.278196
ENSG00000047457	CP	14.3771	-1.29109	0.830152	-1.55524	0.119888	0.459224
ENSG00000047578	KIAA0556	663.99	-0.12689	0.260387	-0.487313	0.626036	0.876967
ENSG00000047579	DTNBP1	1403.45	0.863425	0.30064	2.87196	0.00407938	0.0709765
ENSG00000047597	XK	20.3634	-0.115163	0.885355	-0.130075	0.896507	0.970614
ENSG00000047617	ANO2	2.26275	-0.574661	2.20802	-0.260261	0.794663	NA
ENSG00000047621	C12orf4	990.476	1.01548	0.56535	1.7962	0.0724622	0.363635
ENSG00000047634	SCML1	2776.57	-0.0863461	0.587883	-0.146876	0.88323	0.967159
ENSG00000047644	WWC3	2313.23	0.641999	0.212362	3.02313	0.00250172	0.0512534
ENSG00000047648	ARHGAP6	26.9661	-1.24894	0.65473	-1.90757	0.0564468	0.323968
ENSG00000047662	FAM184B	123.743	-0.452088	0.476144	-0.949477	0.342378	0.705714
ENSG00000047849	MAP4	4991.17	0.222004	0.452917	0.490166	0.624017	0.876729
ENSG00000047932	GOPC	3089.31	-0.302605	0.487103	-0.621233	0.534446	0.832812
ENSG00000048028	USP28	697.787	-0.629954	0.419976	-1.49998	0.133621	0.480881
ENSG00000048052	HDAC9	84.6803	0.799071	0.497901	1.60488	0.108521	0.43885
ENSG00000048140	TSPAN17	3670.63	0.47653	0.638649	0.746153	0.455575	0.786479
ENSG00000048162	NOP16	3282.18	2.1987	0.704626	3.12038	0.00180617	0.0411995
ENSG00000048342	CC2D2A	41.4663	0.720489	0.651737	1.10549	0.268947	0.643829
ENSG00000048392	RRM2B	1190.01	-0.568092	0.559306	-1.01571	0.309768	0.679173
ENSG00000048405	ZNF800	2464.95	0.0634291	0.410195	0.154632	0.877112	0.964661
ENSG00000048462	TNFRSF17	44.0578	1.37295	0.788728	1.74071	0.0817337	0.38789
ENSG00000048471	SNX29	1744.98	-0.576339	0.310178	-1.85809	0.0631561	0.342719
ENSG00000048540	LMO3	2.54783	1.2373	1.45042	0.853064	0.393624	NA
ENSG00000048544	MRPS10	2115.64	0.376642	0.309816	1.2157	0.224101	0.599678
ENSG00000048649	RSF1	4015.16	0.186228	0.333172	0.558954	0.576193	0.854549
ENSG00000048707	VPS13D	3350.62	-0.220741	0.293444	-0.752241	0.451906	0.784391
ENSG00000048740	CELF2	12246.6	-0.220782	0.207043	-1.06635	0.286263	0.659749
ENSG00000048828	FAM120A	8895.15	0.128981	0.349902	0.368621	0.71241	0.911059
ENSG00000048991	R3HDM1	1785.57	-0.0153777	0.347842	-0.0442089	0.964738	0.991856
ENSG00000049089	COL9A2	192.345	0.190775	0.610092	0.3127	0.754509	0.926266
ENSG00000049130	KITLG	2.32066	0.840987	1.87754	0.44792	0.654211	NA
ENSG00000049167	ERCC8	340.275	0.117182	0.352745	0.3322	0.739738	0.920972
ENSG00000049192	ADAMTS6	132.237	-0.661967	0.609097	-1.0868	0.277125	0.65182
ENSG00000049239	H6PD	3022.92	-0.284153	0.224163	-1.26762	0.204935	0.574501
ENSG00000049245	VAMP3	1769.49	-0.0717802	0.126631	-0.566844	0.57082	0.852212
ENSG00000049246	PER3	530.414	-0.0624745	0.228795	-0.273059	0.784808	0.935709
ENSG00000049247	UTS2	79.3405	-0.295825	0.836672	-0.353574	0.723658	0.915417
ENSG00000049249	TNFRSF9	1723.52	4.64308	0.961184	4.83058	1.36133e-06	0.000154959
ENSG00000049283	EPN3	5.35922	0.284228	1.3629	0.208547	0.834802	NA
ENSG00000049323	LTBP1	33.667	-0.74589	0.70765	-1.05404	0.291865	0.663679
ENSG00000049449	RCN1	1565.41	2.03097	0.532676	3.81276	0.000137423	0.00619066
ENSG00000049540	ELN	60.1644	0.174514	0.440021	0.396604	0.69166	0.902672
ENSG00000049541	RFC2	2092.43	0.41534	0.60904	0.681958	0.495266	0.809823
ENSG00000049618	ARID1B	4704.51	-0.113066	0.160981	-0.702355	0.482458	0.803178
ENSG00000049656	CLPTM1L	6145.97	0.428738	0.314368	1.36381	0.172629	0.537782
ENSG00000049759	NEDD4L	221.543	0.992664	0.488783	2.03089	0.0422661	0.279637
ENSG00000049768	FOXP3	4052.26	0.00340016	0.695039	0.00489205	0.996097	0.999272
ENSG00000049769	PPP1R3F	1028.3	-0.518146	0.442307	-1.17146	0.241413	0.616545
ENSG00000049860	HEXB	2255.41	-0.14608	0.188499	-0.774962	0.438362	0.774775
ENSG00000049883	PTCD2	701.418	-0.33692	0.418166	-0.805709	0.420411	0.762156
ENSG00000050030	NEXMIF	67.2873	-0.9719	0.689441	-1.40969	0.15863	0.517646
ENSG00000050130	JKAMP	1261.73	-0.592062	0.460699	-1.28514	0.198743	0.568699
ENSG00000050165	DKK3	16.2887	-1.48265	1.12804	-1.31436	0.188726	0.557317
ENSG00000050327	ARHGEF5	395.091	-0.213695	0.483673	-0.441816	0.658622	0.891522
ENSG00000050344	NFE2L3	1449.02	1.21251	0.521146	2.32663	0.019985	0.189112
ENSG00000050393	MCUR1	1794.34	0.567749	0.4882	1.16294	0.244852	0.620237
ENSG00000050405	LIMA1	981.264	0.587015	0.412406	1.42339	0.154622	0.511882
ENSG00000050426	LETMD1	4071.08	-0.307534	0.251101	-1.22474	0.220672	0.595405
ENSG00000050438	SLC4A8	187.012	-0.418346	0.401277	-1.04254	0.297162	0.6683
ENSG00000050555	LAMC3	155.785	-1.72732	0.573434	-3.01225	0.00259322	0.0525742
ENSG00000050628	PTGER3	141.249	4.18183	0.904279	4.62449	3.75516e-06	0.000362094
ENSG00000050730	TNIP3	614.549	4.71925	1.17776	4.00696	6.1504e-05	0.00343863
ENSG00000050748	MAPK9	2301.03	-0.186691	0.323044	-0.577911	0.563324	0.848295
ENSG00000050767	COL23A1	8.0784	-1.74115	0.853564	-2.03986	0.0413642	NA
ENSG00000050820	BCAR1	15.405	0.76687	0.915012	0.838099	0.401975	0.748654
ENSG00000051009	FAM160A2	2062.3	-0.132938	0.317801	-0.418305	0.675724	0.897221
ENSG00000051108	HERPUD1	5274.4	1.3945	0.306992	4.54247	5.55998e-06	0.000503073
ENSG00000051128	HOMER3	43.4347	-0.374917	0.433744	-0.864373	0.387383	0.738444
ENSG00000051180	RAD51	1149.16	2.08987	1.14426	1.82639	0.0677909	0.352425
ENSG00000051341	POLQ	243.697	-0.859083	0.942113	-0.911868	0.361838	0.72147
ENSG00000051382	PIK3CB	1607.08	-0.416126	0.321302	-1.29512	0.195278	0.565642
ENSG00000051523	CYBA	14669.5	-0.193787	0.465456	-0.416338	0.677163	0.897464
ENSG00000051596	THOC3	2774.17	-0.361553	0.429978	-0.840865	0.400424	0.746973
ENSG00000051620	HEBP2	2259.08	-0.20119	0.227261	-0.885281	0.376005	0.731661
ENSG00000051825	MPHOSPH9	1821.15	0.0359905	0.445928	0.0807092	0.935673	0.984227
ENSG00000052126	PLEKHA5	267.435	-0.139793	0.354101	-0.394782	0.693004	0.903169
ENSG00000052344	PRSS8	30.3547	0.208857	0.496816	0.42039	0.6742	0.896928
ENSG00000052723	SIKE1	2930.47	0.429336	0.227058	1.89086	0.0586425	0.330016
ENSG00000052749	RRP12	3477.01	2.44879	0.622847	3.9316	8.43809e-05	0.00433718
ENSG00000052795	FNIP2	736.491	0.0859718	0.37322	0.230352	0.817818	0.945304
ENSG00000052802	MSMO1	1602.85	1.04485	0.388997	2.68601	0.00723114	0.101795
ENSG00000052841	TTC17	2943.47	-0.156239	0.393249	-0.397302	0.691145	0.90246
ENSG00000052850	ALX4	2.05751	0.177702	1.44472	0.123001	0.902106	NA
ENSG00000053108	FSTL4	12.104	0.0957887	0.914824	0.104707	0.916608	0.978036
ENSG00000053254	FOXN3	5397.96	0.201337	0.268151	0.750833	0.452753	0.784911
ENSG00000053328	METTL24	1.64255	-0.768642	2.20821	-0.348084	0.727777	NA
ENSG00000053371	AKR7A2	2313.32	-0.845308	0.430963	-1.96144	0.0498281	0.304941
ENSG00000053372	MRTO4	5277.94	1.94015	0.684106	2.83604	0.00456767	0.0761333
ENSG00000053438	NNAT	58.4347	-0.166319	0.501011	-0.331968	0.739914	0.920973
ENSG00000053501	USE1	2328.74	0.255701	0.413	0.619132	0.535829	0.834016
ENSG00000053524	MCF2L2	173.048	0.0195	0.344172	0.0566578	0.954818	0.990032
ENSG00000053702	NRIP2	333.481	-0.21268	0.38318	-0.555038	0.578869	0.856758
ENSG00000053747	LAMA3	5.75108	0.685696	1.05104	0.652395	0.514146	NA
ENSG00000053770	AP5M1	2157.9	0.206228	0.423508	0.486951	0.626293	0.876967
ENSG00000053900	ANAPC4	2109.23	-0.131503	0.348156	-0.377712	0.705645	0.908302
ENSG00000053918	KCNQ1	1435.29	-1.19645	0.416059	-2.87568	0.00403164	0.0706293
ENSG00000054116	TRAPPC3	2934.97	0.0638412	0.246518	0.258971	0.795658	0.938757
ENSG00000054118	THRAP3	9489.94	0.132062	0.333246	0.396289	0.691891	0.902672
ENSG00000054148	PHPT1	2165.61	1.41565	0.584085	2.42371	0.015363	0.160545
ENSG00000054179	ENTPD2	11.9376	3.91196	1.52075	2.57239	0.0100999	0.123868
ENSG00000054219	LY75	3028.53	0.116383	0.235347	0.494518	0.62094	0.87519
ENSG00000054267	ARID4B	6195.37	0.504852	0.50165	1.00638	0.314231	0.682944
ENSG00000054277	OPN3	721.284	-0.526939	0.348713	-1.5111	0.130764	0.476002
ENSG00000054282	SDCCAG8	813.092	-0.299053	0.363083	-0.82365	0.410139	0.754085
ENSG00000054356	PTPRN	11.4349	-2.73035	1.4445	-1.89017	0.0587346	0.330418
ENSG00000054392	HHAT	96.9261	0.132093	0.309552	0.426721	0.669582	0.895208
ENSG00000054523	KIF1B	940.577	-0.344539	0.297976	-1.15626	0.247573	0.623225
ENSG00000054598	FOXC1	7.42238	0.772153	0.90821	0.850192	0.395218	NA
ENSG00000054611	TBC1D22A	3099.24	-0.524846	0.316975	-1.65579	0.0977635	0.418398
ENSG00000054654	SYNE2	3899.75	0.581047	0.494794	1.17432	0.240267	0.615707
ENSG00000054690	PLEKHH1	42.5442	0.0713852	0.6641	0.107492	0.914399	0.976973
ENSG00000054793	ATP9A	62.3067	0.569885	0.578164	0.985681	0.32429	0.692342
ENSG00000054965	FAM168A	1903.76	-0.48169	0.306481	-1.57168	0.116025	0.452524
ENSG00000054967	RELT	1421.9	0.79024	0.572398	1.38058	0.167409	0.531785
ENSG00000054983	GALC	1047.25	-0.144256	0.191892	-0.751758	0.452197	0.784722
ENSG00000055044	NOP58	7755.83	1.2236	0.538924	2.27046	0.0231798	0.204812
ENSG00000055070	SZRD1	11368.2	1.04643	0.55147	1.89753	0.0577576	0.327288
ENSG00000055118	KCNH2	192.684	-1.48765	0.579168	-2.56859	0.0102113	0.124299
ENSG00000055130	CUL1	4839.72	0.155655	0.252449	0.616581	0.537511	0.835331
ENSG00000055147	FAM114A2	1078.42	-0.0753668	0.36296	-0.207645	0.835506	0.950622
ENSG00000055163	CYFIP2	17166.7	-0.483887	0.341967	-1.41501	0.157065	0.515579
ENSG00000055208	TAB2	8203.97	0.0686533	0.342176	0.200638	0.840982	0.952355
ENSG00000055211	GINM1	1102.13	-0.0124811	0.218662	-0.0570793	0.954482	0.98993
ENSG00000055332	EIF2AK2	3066.3	0.76844	0.598122	1.28476	0.198878	0.568732
ENSG00000055483	USP36	6155.49	0.663019	0.242901	2.72959	0.00634138	0.0945733
ENSG00000055609	KMT2C	4168.4	-0.36019	0.422263	-0.852999	0.39366	0.74354
ENSG00000055732	MCOLN3	104.411	0.00632484	0.561769	0.0112588	0.991017	0.997945
ENSG00000055917	PUM2	9827.4	-0.141829	0.4057	-0.349592	0.726645	0.916663
ENSG00000055950	MRPL43	2779.65	-0.160635	0.271826	-0.590948	0.554555	0.844208
ENSG00000055955	ITIH4	449.093	-0.160281	0.562041	-0.285176	0.775509	0.934187
ENSG00000055957	ITIH1	9.40682	-0.423597	0.783853	-0.540403	0.588919	0.862877
ENSG00000056050	HPF1	759.837	0.346292	0.373328	0.927582	0.353625	0.71583
ENSG00000056097	ZFR	4816	0.045003	0.326061	0.13802	0.890224	0.969132
ENSG00000056277	ZNF280C	248.825	0.280841	0.500677	0.560922	0.574851	0.853969
ENSG00000056291	NPFFR2	1.14968	-0.0275935	2.40227	-0.0114864	0.990835	NA
ENSG00000056558	TRAF1	15178.3	1.36282	0.571117	2.38623	0.0170221	0.171656
ENSG00000056586	RC3H2	3038.72	0.344336	0.269645	1.277	0.201602	0.571278
ENSG00000056736	IL17RB	207.546	-0.528249	0.230894	-2.28784	0.0221468	0.199535
ENSG00000056972	TRAF3IP2	893.051	-0.935349	0.257727	-3.62922	0.00028428	0.0110015
ENSG00000056998	GYG2	5.58502	-1.65024	0.897404	-1.8389	0.0659295	NA
ENSG00000057019	DCBLD2	216.737	-0.767485	0.372499	-2.06037	0.0393634	0.269447
ENSG00000057252	SOAT1	3722.75	0.957041	0.36586	2.61587	0.00890011	0.115895
ENSG00000057294	PKP2	71.3193	-0.935965	0.342325	-2.73414	0.00625435	0.0938555
ENSG00000057468	MSH4	12.332	0.255523	0.788279	0.324153	0.745822	0.922662
ENSG00000057593	F7	4.24715	1.79837	1.29269	1.39118	0.164171	NA
ENSG00000057608	GDI2	14136.8	0.416129	0.308369	1.34945	0.177191	0.543546
ENSG00000057657	PRDM1	1455.79	2.20754	0.710697	3.10616	0.00189535	0.0425537
ENSG00000057663	ATG5	1846.5	0.686695	0.452661	1.51702	0.129262	0.474321
ENSG00000057704	TMCC3	72.7676	-0.799517	0.612321	-1.30571	0.191649	0.561174
ENSG00000057757	PITHD1	4498.91	0.0944927	0.217074	0.435302	0.663344	0.894329
ENSG00000057935	MTA3	1615.55	-0.043342	0.244144	-0.177527	0.859095	0.959041
ENSG00000058056	USP13	546.031	-0.691827	0.456833	-1.5144	0.129925	0.475161
ENSG00000058063	ATP11B	4485.91	-0.240479	0.440092	-0.546428	0.584771	0.860001
ENSG00000058085	LAMC2	7.08896	-0.934164	0.825272	-1.13195	0.257657	NA
ENSG00000058091	CDK14	46.0106	0.537122	0.490643	1.09473	0.273634	0.648381
ENSG00000058262	SEC61A1	13414.8	0.543304	0.296922	1.82979	0.0672818	0.351628
ENSG00000058272	PPP1R12A	4865.61	0.276066	0.501742	0.550215	0.582172	0.858323
ENSG00000058335	RASGRF1	20.9546	0.163288	0.604086	0.270306	0.786925	0.936309
ENSG00000058404	CAMK2B	41.6999	0.673668	0.966794	0.696806	0.485924	0.805069
ENSG00000058453	CROCC	3247.2	-0.485206	0.298556	-1.62518	0.104125	0.430198
ENSG00000058600	POLR3E	4539.07	0.322745	0.29843	1.08148	0.279484	0.653455
ENSG00000058668	ATP2B4	3092.09	-1.19275	0.344802	-3.45923	0.00054172	0.0173879
ENSG00000058673	ZC3H11A	8868.52	-0.128464	0.418463	-0.30699	0.758851	0.928081
ENSG00000058729	RIOK2	1541.12	0.815531	0.443154	1.84029	0.065726	0.348335
ENSG00000058799	YIPF1	946.862	0.0828357	0.303704	0.272751	0.785045	0.935753
ENSG00000058804	NDC1	2120.99	0.409651	0.475944	0.860714	0.389396	0.739766
ENSG00000058866	DGKG	15.7061	0.21937	0.902314	0.243119	0.807913	0.94213
ENSG00000059122	FLYWCH1	4505.79	-0.736065	0.331359	-2.22135	0.0263272	0.21855
ENSG00000059145	UNKL	2435.62	-0.474976	0.29833	-1.59212	0.111359	0.444022
ENSG00000059377	TBXAS1	293.97	0.213175	0.301501	0.707046	0.479538	0.801635
ENSG00000059378	PARP12	3693.36	0.984204	0.238563	4.12556	3.69832e-05	0.00229522
ENSG00000059573	ALDH18A1	4189.02	0.884758	0.578762	1.52871	0.126337	0.469134
ENSG00000059588	TARBP1	3180.44	0.306273	0.330508	0.926674	0.354096	0.716195
ENSG00000059691	GATB	854.019	-0.0146805	0.396681	-0.0370082	0.970478	0.994057
ENSG00000059728	MXD1	1124.01	0.112851	0.432215	0.2611	0.794015	0.938615
ENSG00000059758	CDK17	3575.25	0.558233	0.327269	1.70573	0.0880579	0.399194
ENSG00000059769	DNAJC25	412.803	0.61846	0.420837	1.46959	0.141672	0.493108
ENSG00000059804	SLC2A3	6719.61	1.29569	0.316056	4.09954	4.1397e-05	0.00250909
ENSG00000059915	PSD	1177.33	-0.494911	0.38975	-1.26982	0.20415	0.573833
ENSG00000060069	CTDP1	3326.54	0.274656	0.270283	1.01618	0.309544	0.678938
ENSG00000060138	YBX3	2665.25	2.3669	0.676745	3.49748	0.000469677	0.0157244
ENSG00000060140	STYK1	21.7217	0.26372	0.738168	0.357263	0.720895	0.914077
ENSG00000060237	WNK1	7689.31	-0.301581	0.342975	-0.87931	0.379233	0.734634
ENSG00000060339	CCAR1	5656.92	0.0044616	0.454309	0.00982062	0.992164	0.998545
ENSG00000060491	OGFR	9163.05	1.09026	0.396882	2.74707	0.00601306	0.0912674
ENSG00000060558	GNA15	902.129	1.63209	0.600985	2.7157	0.00661365	0.0966073
ENSG00000060566	CREB3L3	3.83743	-0.118724	2.33111	-0.05093	0.959381	NA
ENSG00000060642	PIGV	775.548	-0.142899	0.264475	-0.540311	0.588983	0.862877
ENSG00000060656	PTPRU	8.04996	-0.0696542	1.33963	-0.0519951	0.958533	NA
ENSG00000060688	SNRNP40	3881.43	0.535158	0.316877	1.68885	0.0912479	0.406505
ENSG00000060749	QSER1	858.869	-0.571737	0.4361	-1.31102	0.18985	0.55894
ENSG00000060762	MPC1	1306.54	-0.228005	0.226081	-1.00851	0.313209	0.682229
ENSG00000060971	ACAA1	3591.8	-0.423479	0.299692	-1.41305	0.157641	0.516154
ENSG00000060982	BCAT1	438.565	1.34328	0.556304	2.41465	0.0157503	0.163493
ENSG00000061273	HDAC7	13463.9	0.163751	0.262831	0.623029	0.533266	0.832156
ENSG00000061337	LZTS1	105.934	0.454934	0.421188	1.08012	0.280089	0.653868
ENSG00000061455	PRDM6	11.3491	-0.165478	0.676758	-0.244515	0.806832	0.942
ENSG00000061492	WNT8A	1.57447	1.35115	3.19705	0.422624	0.67257	NA
ENSG00000061656	SPAG4	57.3251	1.06444	0.702566	1.51507	0.129754	0.475161
ENSG00000061676	NCKAP1	271.885	-0.997608	0.673043	-1.48223	0.138278	0.487538
ENSG00000061794	MRPS35	2646.6	0.716215	0.37795	1.895	0.0580922	0.327963
ENSG00000061918	GUCY1B1	71.9431	0.779956	0.365568	2.13355	0.0328799	0.245764
ENSG00000061936	SFSWAP	5005.83	0.0491169	0.160793	0.305467	0.76001	0.928422
ENSG00000061938	TNK2	7475.2	-0.448795	0.271723	-1.65166	0.0986029	0.419642
ENSG00000061987	MON2	2824.89	-0.22401	0.563139	-0.397789	0.690786	0.902144
ENSG00000062038	CDH3	62.4949	-0.839384	0.671218	-1.25054	0.211103	0.582004
ENSG00000062096	ARSF	5.23807	-0.238382	1.05351	-0.226274	0.820989	NA
ENSG00000062194	GPBP1	6505.48	0.342503	0.449681	0.761658	0.446264	0.779401
ENSG00000062282	DGAT2	142.576	1.05381	0.75677	1.39251	0.163769	0.526821
ENSG00000062370	ZNF112	13.9086	-0.344798	0.832711	-0.414067	0.678825	0.897946
ENSG00000062485	CS	9707.49	0.415138	0.447523	0.927635	0.353597	0.71583
ENSG00000062524	LTK	69.7571	-0.436224	0.768149	-0.56789	0.570109	0.851795
ENSG00000062582	MRPS24	3971.73	0.504931	0.421763	1.19719	0.231232	0.607174
ENSG00000062598	ELMO2	2608.08	-0.0968024	0.203687	-0.475251	0.634608	0.880832
ENSG00000062650	WAPL	4452.81	0.0398245	0.334692	0.118988	0.905285	0.97382
ENSG00000062716	VMP1	5963.73	1.59366	0.38547	4.13433	3.55999e-05	0.00226222
ENSG00000062725	APPBP2	2182.97	-0.337035	0.258207	-1.30529	0.191794	0.561174
ENSG00000062822	POLD1	4343.56	0.147362	0.586035	0.251455	0.801462	0.940514
ENSG00000063015	SEZ6	27.3472	-2.14444	0.697271	-3.07547	0.00210172	0.0455795
ENSG00000063046	EIF4B	46019	-0.38237	0.179808	-2.12655	0.0334578	0.24795
ENSG00000063127	SLC6A16	145.899	-0.283452	0.362141	-0.782711	0.433797	0.771132
ENSG00000063169	BICRA	2051.43	-0.253245	0.282764	-0.895606	0.370463	0.727437
ENSG00000063176	SPHK2	1488.89	-0.161839	0.377843	-0.428325	0.668415	0.895022
ENSG00000063177	RPL18	111859	-0.0771615	0.386459	-0.199663	0.841744	0.952806
ENSG00000063180	CA11	667.005	-0.229414	0.326307	-0.703063	0.482017	0.802839
ENSG00000063241	ISOC2	1512.18	1.13713	0.610048	1.864	0.0623221	0.340604
ENSG00000063244	U2AF2	16275.9	0.364181	0.437681	0.832069	0.40537	0.751296
ENSG00000063245	EPN1	3988.07	0.130767	0.373753	0.349874	0.726433	0.916663
ENSG00000063322	MED29	2917.54	0.138441	0.311999	0.443724	0.657242	0.890429
ENSG00000063438	AHRR	956.599	-0.304415	0.625048	-0.487027	0.626239	0.876967
ENSG00000063587	ZNF275	2378.29	0.368446	0.248985	1.47979	0.138929	0.488608
ENSG00000063601	MTMR1	3379.77	0.224883	0.337746	0.665834	0.505517	0.816454
ENSG00000063660	GPC1	264.745	0.45467	0.711037	0.639447	0.522532	0.82616
ENSG00000063761	ADCK1	482.208	0.16871	0.432506	0.390076	0.69648	0.904277
ENSG00000063854	HAGH	2772.51	-0.304119	0.262968	-1.15649	0.247483	0.623113
ENSG00000063978	RNF4	6654.28	0.159654	0.253675	0.629366	0.52911	0.829522
ENSG00000064012	CASP8	4548.45	-0.416182	0.419592	-0.991874	0.321259	0.689531
ENSG00000064042	LIMCH1	20.4567	1.28563	0.938045	1.37054	0.170517	0.535174
ENSG00000064102	INTS13	1880.22	0.731427	0.432131	1.6926	0.0905308	0.405087
ENSG00000064115	TM7SF3	1424.67	-0.520991	0.283814	-1.83568	0.0664053	0.349948
ENSG00000064195	DLX3	3.35667	-1.5582	1.75449	-0.888124	0.374474	NA
ENSG00000064199	SPA17	101.135	-0.0250867	0.706977	-0.0354845	0.971693	0.994407
ENSG00000064201	TSPAN32	1069.9	-1.40239	0.611169	-2.29461	0.0217556	0.197479
ENSG00000064205	WISP2	25.26	1.15342	0.501628	2.29935	0.0214852	0.195919
ENSG00000064225	ST3GAL6	80.8353	-1.41971	0.735452	-1.93039	0.0535587	0.317045
ENSG00000064270	ATP2C2	19.2442	-0.0670901	0.75845	-0.0884569	0.929514	0.981723
ENSG00000064300	NGFR	14.4799	0.924398	0.797206	1.15955	0.246233	0.622131
ENSG00000064309	CDON	166.007	-0.125082	0.353895	-0.353443	0.723756	0.915484
ENSG00000064313	TAF2	1848.9	0.257334	0.492257	0.522764	0.601139	0.867126
ENSG00000064393	HIPK2	3179.65	-0.295954	0.215022	-1.37639	0.168701	0.533564
ENSG00000064419	TNPO3	3778.87	0.0194404	0.337092	0.0576709	0.954011	0.989723
ENSG00000064489	BORCS8-MEF2B	490.244	0.127031	0.371543	0.341901	0.732425	0.91757
ENSG00000064490	RFXANK	2729.55	0.0744752	0.437123	0.170376	0.864715	0.961
ENSG00000064545	TMEM161A	1637.96	0.248415	0.397225	0.625376	0.531724	0.831287
ENSG00000064547	LPAR2	2611.35	-0.692808	0.288229	-2.40368	0.0162312	0.166779
ENSG00000064601	CTSA	4154.98	0.353374	0.424261	0.832915	0.404893	0.751047
ENSG00000064607	SUGP2	5053.51	-0.0502967	0.184059	-0.273265	0.78465	0.935709
ENSG00000064651	SLC12A2	879.961	0.615832	0.44367	1.38804	0.165124	0.528831
ENSG00000064652	SNX24	67.8995	-0.211376	0.471847	-0.447975	0.654171	0.889004
ENSG00000064655	EYA2	1.42647	1.4226	3.46064	0.41108	0.681014	NA
ENSG00000064666	CNN2	14303.8	-0.62757	0.378247	-1.65915	0.0970848	0.417061
ENSG00000064687	ABCA7	5623.7	-0.964929	0.657889	-1.46671	0.142456	0.494533
ENSG00000064692	SNCAIP	9.11544	0.14209	1.13283	0.12543	0.900183	0.971789
ENSG00000064703	DDX20	1746.24	0.215975	0.282102	0.765589	0.443921	0.778233
ENSG00000064726	BTBD1	3236.99	0.55608	0.419776	1.32471	0.185269	0.55334
ENSG00000064763	FAR2	319.558	-0.00710391	0.428555	-0.0165764	0.986775	0.996794
ENSG00000064787	BCAS1	18.4295	0.419875	0.719799	0.583322	0.559677	0.846846
ENSG00000064835	POU1F1	4.38411	0.539248	1.3984	0.385617	0.69978	NA
ENSG00000064886	CHI3L2	1192.72	-0.458653	0.523196	-0.876636	0.380685	0.735633
ENSG00000064932	SBNO2	11672.2	2.29731	0.432682	5.30947	1.09944e-07	1.74526e-05
ENSG00000064933	PMS1	1053.43	-0.364853	0.482422	-0.756293	0.449473	0.78224
ENSG00000064961	HMG20B	3385.85	-0.233511	0.363438	-0.642506	0.520545	0.825254
ENSG00000064989	CALCRL	74.7825	0.0726841	0.468828	0.155034	0.876795	0.964636
ENSG00000064995	TAF11	2249.14	0.0576004	0.174866	0.329397	0.741856	0.921583
ENSG00000064999	ANKS1A	1073.07	-0.171542	0.182771	-0.938564	0.347955	0.710804
ENSG00000065000	AP3D1	7895.2	0.261945	0.259395	1.00983	0.312576	0.682061
ENSG00000065029	ZNF76	2929.4	-0.420376	0.252043	-1.66787	0.0953414	0.414005
ENSG00000065054	SLC9A3R2	188.618	-1.30456	0.357275	-3.65142	0.000260798	0.0103499
ENSG00000065057	NTHL1	717.803	-1.05111	0.514071	-2.04469	0.0408857	0.274552
ENSG00000065060	UHRF1BP1	1011.3	0.0700696	0.323468	0.21662	0.828505	0.949426
ENSG00000065135	GNAI3	4280.6	0.491082	0.450474	1.09015	0.275648	0.650655
ENSG00000065150	IPO5	8445.64	0.356179	0.421555	0.844919	0.398156	0.746128
ENSG00000065154	OAT	2163.93	0.132883	0.220346	0.603065	0.546465	0.839908
ENSG00000065183	WDR3	3380.95	1.01176	0.539703	1.87466	0.0608399	0.335626
ENSG00000065243	PKN2	1594.65	-0.207317	0.504504	-0.410933	0.681121	0.89898
ENSG00000065268	WDR18	3629.43	0.720593	0.548954	1.31267	0.189295	0.558434
ENSG00000065308	TRAM2	719.051	-1.33788	0.345674	-3.87035	0.000108679	0.00520744
ENSG00000065320	NTN1	50.2639	1.47992	0.568411	2.60361	0.00922466	0.117885
ENSG00000065328	MCM10	1187.04	0.58052	1.21772	0.476727	0.633556	0.880579
ENSG00000065357	DGKA	18324.3	-0.375807	0.306238	-1.22717	0.219758	0.594204
ENSG00000065361	ERBB3	165.307	-0.585746	0.593916	-0.986244	0.324013	0.692056
ENSG00000065371	ROPN1	2.54452	-0.878711	1.58817	-0.553284	0.580069	NA
ENSG00000065413	ANKRD44	7944.48	0.195856	0.272123	0.719733	0.471689	0.79731
ENSG00000065427	KARS	12278.9	0.992446	0.472635	2.09982	0.0357451	0.255954
ENSG00000065457	ADAT1	912.434	-0.0279468	0.264966	-0.105473	0.916	0.977852
ENSG00000065485	PDIA5	578.667	1.76285	0.570192	3.09167	0.00199031	0.0440943
ENSG00000065491	TBC1D22B	1031.62	0.0497294	0.295357	0.16837	0.866292	0.961493
ENSG00000065518	NDUFB4	4168.27	0.247889	0.312938	0.792136	0.428281	0.766936
ENSG00000065526	SPEN	4955.84	0.159517	0.271246	0.588091	0.556471	0.845393
ENSG00000065534	MYLK	168.658	-0.134335	0.427488	-0.314244	0.753336	0.925898
ENSG00000065548	ZC3H15	4699.13	0.700033	0.480862	1.45579	0.145452	0.499042
ENSG00000065559	MAP2K4	1825.2	0.492864	0.318712	1.54643	0.122002	0.462536
ENSG00000065600	TMEM206	552.047	-0.23793	0.26296	-0.904815	0.365564	0.723715
ENSG00000065613	SLK	2496.81	0.228394	0.612138	0.373109	0.709068	0.90951
ENSG00000065615	CYB5R4	1548	0.596748	0.558047	1.06935	0.284912	0.658596
ENSG00000065618	COL17A1	3.4211	-0.177058	1.66543	-0.106313	0.915334	NA
ENSG00000065621	GSTO2	189.139	-0.347107	0.38384	-0.9043	0.365836	0.723789
ENSG00000065665	SEC61A2	633.212	-0.262555	0.306091	-0.857769	0.39102	0.741102
ENSG00000065675	PRKCQ	3690.35	-0.242883	0.185348	-1.31042	0.190054	0.5594
ENSG00000065717	TLE2	1365.96	-0.862965	0.345403	-2.49843	0.0124744	0.14077
ENSG00000065802	ASB1	2949.82	0.133044	0.39753	0.334677	0.737868	0.920786
ENSG00000065809	FAM107B	10613.1	0.121681	0.322302	0.377535	0.705776	0.908302
ENSG00000065833	ME1	30.9238	0.600835	0.512847	1.17157	0.24137	0.616545
ENSG00000065882	TBC1D1	3419.56	0.735702	0.410665	1.79149	0.073215	0.365843
ENSG00000065883	CDK13	5089.83	0.00907073	0.210571	0.0430769	0.96564	0.99226
ENSG00000065911	MTHFD2	11337.3	3.55314	0.458578	7.74817	9.32233e-15	8.70146e-12
ENSG00000065923	SLC9A7	943.365	0.49986	0.477887	1.04598	0.295571	0.667254
ENSG00000065970	FOXJ2	2248.39	-0.773495	0.288708	-2.67916	0.00738072	0.103131
ENSG00000065978	YBX1	46095.9	0.68768	0.532858	1.29055	0.196859	0.567629
ENSG00000065989	PDE4A	358.222	0.223851	0.455199	0.491766	0.622885	0.876046
ENSG00000066027	PPP2R5A	3340.82	-0.153002	0.227754	-0.671785	0.501721	0.814106
ENSG00000066032	CTNNA2	9.40749	-0.046079	1.48707	-0.0309865	0.97528	0.994947
ENSG00000066044	ELAVL1	7171.13	0.32503	0.433666	0.749494	0.453559	0.785421
ENSG00000066056	TIE1	56.9335	-0.417774	0.472229	-0.884686	0.376326	0.731737
ENSG00000066084	DIP2B	2791.73	-0.329927	0.231922	-1.42258	0.154859	0.51234
ENSG00000066117	SMARCD1	3945.9	0.202316	0.368419	0.549147	0.582905	0.858392
ENSG00000066135	KDM4A	1785.72	-0.109043	0.224915	-0.484819	0.627805	0.877679
ENSG00000066136	NFYC	3368.67	0.102494	0.295175	0.347232	0.728417	0.917202
ENSG00000066185	ZMYND12	26.6298	-0.840333	0.638734	-1.31562	0.188301	0.556916
ENSG00000066230	SLC9A3	637.136	-0.181864	0.294142	-0.618287	0.536386	0.834305
ENSG00000066248	NGEF	3.25412	-2.57886	1.38677	-1.85962	0.0629389	NA
ENSG00000066279	ASPM	251.871	0.0680746	1.22847	0.055414	0.955809	0.990137
ENSG00000066294	CD84	2458.39	0.318602	0.297975	1.06922	0.284969	0.658596
ENSG00000066322	ELOVL1	2750.83	-0.231195	0.463497	-0.498804	0.617917	0.874086
ENSG00000066336	SPI1	488.78	-0.439307	0.556219	-0.78981	0.429639	0.767804
ENSG00000066379	ZNRD1	2428.35	0.817453	0.386989	2.11234	0.0346572	0.252333
ENSG00000066382	MPPED2	53.3216	-0.579736	0.536435	-1.08072	0.279821	0.653747
ENSG00000066405	CLDN18	4.31843	0.14752	0.812077	0.181658	0.855851	NA
ENSG00000066422	ZBTB11	3202.89	0.0466045	0.446624	0.104348	0.916893	0.978048
ENSG00000066427	ATXN3	1721.86	-0.172333	0.369575	-0.466302	0.640999	0.883504
ENSG00000066455	GOLGA5	1316.93	0.0629581	0.446491	0.141007	0.887865	0.968042
ENSG00000066468	FGFR2	73.3178	-1.43032	0.772943	-1.85049	0.0642436	0.344434
ENSG00000066557	LRRC40	1095.66	0.0578962	0.585686	0.098852	0.921256	0.979124
ENSG00000066583	ISOC1	1368	0.531275	0.315791	1.68236	0.0924984	0.40822
ENSG00000066629	EML1	56.7902	0.403107	0.484419	0.832146	0.405327	0.751296
ENSG00000066651	TRMT11	944.755	0.219547	0.434238	0.505591	0.613144	0.871678
ENSG00000066654	THUMPD1	4583.4	0.102579	0.495599	0.206979	0.836026	0.950693
ENSG00000066697	MSANTD3	625.168	-0.588126	0.301057	-1.95353	0.0507563	0.308196
ENSG00000066735	KIF26A	21.5212	-0.804481	0.595302	-1.35138	0.176572	0.54272
ENSG00000066739	ATG2B	2546.3	-0.293523	0.519365	-0.565159	0.571966	0.852876
ENSG00000066777	ARFGEF1	3665.01	-0.178669	0.447518	-0.399245	0.689713	0.902124
ENSG00000066813	ACSM2B	52.7932	-0.955827	0.506829	-1.8859	0.0593087	0.331252
ENSG00000066827	ZFAT	469.571	0.240573	0.276481	0.870125	0.384232	0.736399
ENSG00000066855	MTFR1	980.688	-1.27483	0.552957	-2.30547	0.0211402	0.194238
ENSG00000066923	STAG3	1321.2	-0.487362	0.492609	-0.989347	0.322493	0.690727
ENSG00000066926	FECH	1015	-0.555952	0.348566	-1.59497	0.110719	0.442584
ENSG00000066933	MYO9A	1537.9	-0.107782	0.384388	-0.280399	0.779172	0.935142
ENSG00000067048	DDX3Y	5438.89	0.657475	0.644433	1.02024	0.307615	0.67775
ENSG00000067057	PFKP	7402.15	1.45754	0.651232	2.23813	0.0252125	0.214407
ENSG00000067064	IDI1	3688.96	1.08439	0.497618	2.17917	0.0293192	0.23098
ENSG00000067066	SP100	4701.9	0.69594	0.290479	2.39583	0.0165827	0.168959
ENSG00000067082	KLF6	10022.6	0.943228	0.298166	3.16343	0.00155921	0.0372408
ENSG00000067113	PLPP1	675.453	0.508695	0.411418	1.23644	0.216294	0.589211
ENSG00000067141	NEO1	557.845	-0.980578	0.410198	-2.3905	0.0168255	0.170557
ENSG00000067167	TRAM1	10756	0.112731	0.39936	0.282279	0.77773	0.934888
ENSG00000067177	PHKA1	170.017	-0.279114	0.823436	-0.338962	0.734638	0.918836
ENSG00000067182	TNFRSF1A	3576.57	0.137292	0.291403	0.471142	0.637539	0.882017
ENSG00000067191	CACNB1	542.526	1.17393	0.444674	2.63997	0.00829136	0.111489
ENSG00000067208	EVI5	283.446	0.467223	0.695025	0.672239	0.501431	0.813979
ENSG00000067221	STOML1	954.628	0.286265	0.352685	0.811672	0.41698	0.759889
ENSG00000067225	PKM	69247.8	1.51976	0.809819	1.87667	0.060564	0.334817
ENSG00000067248	DHX29	1282.76	0.137715	0.463437	0.297161	0.766344	0.930658
ENSG00000067334	DNTTIP2	3761.73	1.10255	0.548007	2.01193	0.0442273	0.286599
ENSG00000067365	METTL22	690.065	0.043646	0.183594	0.237731	0.81209	0.943355
ENSG00000067369	TP53BP1	2298.13	0.605097	0.211373	2.8627	0.00420052	0.0720692
ENSG00000067445	TRO	206.016	-1.13618	0.504814	-2.25069	0.0244049	0.210255
ENSG00000067533	RRP15	2354	2.15826	0.596426	3.61866	0.000296132	0.0112964
ENSG00000067560	RHOA	26337	0.383947	0.406275	0.945043	0.344637	0.707385
ENSG00000067596	DHX8	3110.84	0.204006	0.271186	0.752275	0.451886	0.784391
ENSG00000067601	PMS2P4	44.6461	-0.729339	0.433834	-1.68115	0.0927343	0.408524
ENSG00000067606	PRKCZ	940.286	-0.337981	0.350219	-0.965056	0.334517	0.698769
ENSG00000067646	ZFY	568.945	-0.714238	0.751004	-0.951044	0.341582	0.70524
ENSG00000067704	IARS2	4507.93	-0.224857	0.335046	-0.671124	0.502141	0.814544
ENSG00000067715	SYT1	3.40858	1.08195	1.3538	0.799199	0.424175	NA
ENSG00000067798	NAV3	38.2752	-0.663409	0.676677	-0.980391	0.326893	0.693711
ENSG00000067829	IDH3G	3027.48	0.305194	0.443202	0.688613	0.491067	0.808571
ENSG00000067836	ROGDI	428.367	-1.05064	0.492937	-2.1314	0.0330565	0.246131
ENSG00000067840	PDZD4	198.945	0.112695	0.471306	0.239113	0.811018	0.943064
ENSG00000067900	ROCK1	4652.56	0.0538185	0.625012	0.0861078	0.931381	0.982584
ENSG00000067955	CBFB	8710.42	0.898765	0.450378	1.99558	0.0459797	0.292261
ENSG00000067992	PDK3	713.426	0.647575	0.506208	1.27927	0.200803	0.570351
ENSG00000068001	HYAL2	516.47	0.788969	0.679456	1.16118	0.245569	0.621427
ENSG00000068024	HDAC4	1846.96	0.753252	0.235348	3.20058	0.0013715	0.0342656
ENSG00000068028	RASSF1	2954.04	-0.144134	0.189745	-0.759619	0.447482	0.78036
ENSG00000068078	FGFR3	15.5468	0.618973	0.8277	0.747823	0.454567	0.786091
ENSG00000068079	IFI35	3080.38	2.20399	0.607829	3.626	0.000287844	0.0110839
ENSG00000068097	HEATR6	705.579	-0.329993	0.391846	-0.842149	0.399705	0.746826
ENSG00000068120	COASY	3651.74	-0.0588518	0.45429	-0.129547	0.896925	0.970767
ENSG00000068137	PLEKHH3	32.3044	-0.0774416	0.68576	-0.112928	0.910088	0.975694
ENSG00000068305	MEF2A	2093.74	0.0505482	0.353076	0.143165	0.88616	0.967985
ENSG00000068308	OTUD5	6056.49	0.190012	0.333172	0.570312	0.568466	0.850813
ENSG00000068323	TFE3	2912.96	0.70985	0.303007	2.34269	0.0191454	0.184306
ENSG00000068354	TBC1D25	1719.39	0.0290495	0.260405	0.111555	0.911176	0.976007
ENSG00000068366	ACSL4	2690.27	1.31945	0.540157	2.44272	0.0145772	0.155695
ENSG00000068383	INPP5A	799.459	-0.262552	0.167509	-1.56739	0.117024	0.454291
ENSG00000068394	GPKOW	1546.6	0.141388	0.328061	0.430981	0.666482	0.894831
ENSG00000068400	GRIPAP1	4203.88	0.551761	0.2208	2.49892	0.0124573	0.14077
ENSG00000068438	FTSJ1	3400.25	0.752189	0.393606	1.91102	0.0560021	0.323468
ENSG00000068489	PRR11	599.381	0.28238	0.843549	0.334752	0.737812	0.920786
ENSG00000068615	REEP1	23.2983	-0.534538	0.685408	-0.779883	0.43546	0.772441
ENSG00000068650	ATP11A	1742.94	-0.126517	0.457854	-0.276326	0.782298	0.935391
ENSG00000068654	POLR1A	4015.3	1.23055	0.667754	1.84282	0.065356	0.34738
ENSG00000068697	LAPTM4A	3633.65	0.111961	0.204694	0.546967	0.584402	0.859783
ENSG00000068724	TTC7A	3856.15	0.214855	0.478438	0.449075	0.653377	0.888763
ENSG00000068745	IP6K2	3449.82	-0.292866	0.141808	-2.06523	0.0389013	0.268251
ENSG00000068784	SRBD1	898.078	0.44555	0.34587	1.2882	0.197676	0.567994
ENSG00000068796	KIF2A	4250.21	0.255251	0.4491	0.568361	0.56979	0.851545
ENSG00000068831	RASGRP2	15688.8	-1.10718	0.771489	-1.43512	0.151252	0.507275
ENSG00000068878	PSME4	3049.92	0.205734	0.304895	0.67477	0.499822	0.813003
ENSG00000068885	IFT80	823.804	-0.175971	0.535968	-0.328323	0.742667	0.921718
ENSG00000068903	SIRT2	1972.67	-0.362802	0.267045	-1.35858	0.174279	0.540192
ENSG00000068912	ERLEC1	2015.16	-0.170321	0.294805	-0.577744	0.563437	0.848317
ENSG00000068971	PPP2R5B	629.89	-0.407077	0.25485	-1.59732	0.110194	0.441894
ENSG00000068976	PYGM	454.841	-0.448181	0.577159	-0.776529	0.437437	0.774201
ENSG00000069011	PITX1	12.0226	1.60777	0.779984	2.06129	0.0392754	0.269248
ENSG00000069020	MAST4	1533.55	-0.486747	0.283633	-1.71612	0.0861409	0.395632
ENSG00000069122	ADGRF5	1.2599	0.915671	1.77873	0.514789	0.606701	NA
ENSG00000069188	SDK2	777.587	-0.342176	0.742307	-0.460964	0.644825	0.884742
ENSG00000069248	NUP133	2857.03	0.0259263	0.306825	0.0844987	0.93266	0.983108
ENSG00000069275	NUCKS1	12893.1	0.221255	0.34143	0.648024	0.516969	0.82294
ENSG00000069329	VPS35	5386.17	0.114547	0.240921	0.475456	0.634462	0.880832
ENSG00000069345	DNAJA2	5471.78	0.734014	0.291996	2.51378	0.0119446	0.137641
ENSG00000069399	BCL3	3273.62	2.88585	0.723733	3.98745	6.67874e-05	0.00364132
ENSG00000069424	KCNAB2	12717.7	-0.645516	0.368647	-1.75104	0.0799391	0.382799
ENSG00000069431	ABCC9	181.803	0.167485	0.458903	0.364967	0.715136	0.912245
ENSG00000069482	GAL	47.1731	3.46468	2.15655	1.60658	0.108146	0.438274
ENSG00000069493	CLEC2D	14947.2	0.374928	0.42842	0.87514	0.381498	0.735781
ENSG00000069509	FUNDC1	483.662	-0.084399	0.362738	-0.232672	0.816016	0.944952
ENSG00000069535	MAOB	7.65767	0.604792	0.771013	0.784412	0.432799	NA
ENSG00000069667	RORA	3579.31	-0.517775	0.402157	-1.2875	0.197921	0.567994
ENSG00000069696	DRD4	82.2807	-0.643023	0.591233	-1.0876	0.276773	0.651479
ENSG00000069702	TGFBR3	643.517	-0.425621	0.330181	-1.28905	0.19738	0.567994
ENSG00000069764	PLA2G10	21.04	-0.0507033	0.56327	-0.0900159	0.928275	0.981324
ENSG00000069812	HES2	18.3982	-0.202576	0.608672	-0.332816	0.739273	0.920972
ENSG00000069849	ATP1B3	3519.71	1.19266	0.624519	1.90973	0.0561684	0.323477
ENSG00000069869	NEDD4	957.926	-0.082079	0.432728	-0.189678	0.849561	0.955289
ENSG00000069943	PIGB	707.652	-0.137353	0.271416	-0.506061	0.612814	0.871529
ENSG00000069956	MAPK6	1877.78	0.358341	0.519589	0.689662	0.490406	0.808365
ENSG00000069966	GNB5	1702.73	-0.747119	0.27606	-2.70637	0.00680239	0.098715
ENSG00000069974	RAB27A	3581.09	0.981354	0.528338	1.85743	0.0632493	0.342997
ENSG00000069998	HDHD5	3012.03	0.529177	0.344408	1.53648	0.12442	0.466774
ENSG00000070010	UFD1	4528.72	0.458308	0.453548	1.01049	0.312259	0.681633
ENSG00000070018	LRP6	335.328	-0.0532176	0.429847	-0.123806	0.901469	0.972123
ENSG00000070031	SCT	8.57005	1.77534	0.858775	2.0673	0.0387062	NA
ENSG00000070047	PHRF1	6086.54	0.200909	0.346879	0.57919	0.562461	0.847873
ENSG00000070061	ELP1	3015.58	-0.554991	0.248564	-2.23279	0.0255627	0.215734
ENSG00000070081	NUCB2	3546.19	0.126444	0.417525	0.302841	0.762011	0.929259
ENSG00000070087	PFN2	371.857	-1.15954	0.467454	-2.48055	0.013118	0.145351
ENSG00000070159	PTPN3	80.7351	0.0356009	0.474124	0.0750877	0.940145	0.985164
ENSG00000070182	SPTB	38.9293	-0.331519	0.541599	-0.612111	0.540464	0.836737
ENSG00000070190	DAPP1	2102.55	1.21758	0.620051	1.96368	0.0495677	0.304242
ENSG00000070214	SLC44A1	1206.32	-0.520133	0.390932	-1.33049	0.183356	0.551103
ENSG00000070269	TMEM260	983.42	-0.427451	0.496381	-0.861135	0.389164	0.739624
ENSG00000070366	SMG6	3501.92	0.564187	0.335867	1.67979	0.0929978	0.408991
ENSG00000070367	EXOC5	2770.29	0.0791773	0.610184	0.12976	0.896757	0.970675
ENSG00000070371	CLTCL1	41.0517	-0.495686	0.594801	-0.833364	0.404639	0.750875
ENSG00000070388	FGF22	21.2394	0.258864	0.533757	0.484984	0.627687	0.877679
ENSG00000070404	FSTL3	364.943	-0.232802	0.262029	-0.888458	0.374295	0.729854
ENSG00000070413	DGCR2	4822.32	-0.416936	0.219794	-1.89694	0.0578358	0.327509
ENSG00000070423	RNF126	6463.7	0.122522	0.341896	0.35836	0.720074	0.913845
ENSG00000070444	MNT	1735.01	0.0825124	0.211866	0.389455	0.69694	0.904393
ENSG00000070476	ZXDC	2549.49	-0.323176	0.184738	-1.74938	0.0802251	0.383303
ENSG00000070495	JMJD6	2173.65	0.49774	0.327917	1.51788	0.129044	0.473756
ENSG00000070501	POLB	1264.38	0.445488	0.168967	2.63654	0.00837551	0.112375
ENSG00000070526	ST6GALNAC1	120.654	-0.121571	0.595303	-0.204218	0.838183	0.951401
ENSG00000070540	WIPI1	502.541	-0.0795862	0.201926	-0.394136	0.69348	0.903402
ENSG00000070601	FRMPD1	21.831	0.589047	0.53445	1.10216	0.270394	0.644971
ENSG00000070610	GBA2	2097.09	-0.262524	0.242949	-1.08058	0.279886	0.653804
ENSG00000070614	NDST1	325.384	-0.972748	0.559099	-1.73985	0.0818854	0.388333
ENSG00000070669	ASNS	4137.83	2.12799	0.543917	3.91234	9.14061e-05	0.00463687
ENSG00000070718	AP3M2	3204.32	0.488917	0.25152	1.94385	0.0519137	0.31172
ENSG00000070729	CNGB1	34.0508	-0.176934	0.512418	-0.345291	0.729875	0.917328
ENSG00000070731	ST6GALNAC2	32.4798	-0.82946	0.653054	-1.27012	0.20404	0.573808
ENSG00000070748	CHAT	2.63474	-0.09771	1.22607	-0.079694	0.936481	NA
ENSG00000070756	PABPC1	167765	-0.421995	0.178054	-2.37004	0.0177862	0.176238
ENSG00000070759	TESK2	462.965	0.684283	0.260952	2.62225	0.00873502	0.114649
ENSG00000070761	CFAP20	2277.83	0.415755	0.421491	0.986393	0.32394	0.692056
ENSG00000070770	CSNK2A2	4237.17	-0.0941138	0.157374	-0.598028	0.549821	0.841207
ENSG00000070778	PTPN21	7.72648	-1.65901	0.978816	-1.69491	0.0900919	NA
ENSG00000070785	EIF2B3	1237.66	0.994121	0.517279	1.92183	0.0546273	0.319401
ENSG00000070808	CAMK2A	7.78901	0.542162	1.0579	0.51249	0.608308	NA
ENSG00000070814	TCOF1	8623.83	0.782184	0.516705	1.51379	0.130078	0.475161
ENSG00000070831	CDC42	13427	0.247779	0.27702	0.894444	0.371085	0.72809
ENSG00000070882	OSBPL3	1899.3	1.80487	0.529571	3.40817	0.000653997	0.0200014
ENSG00000070886	EPHA8	3.3146	0.0814004	1.27943	0.0636222	0.949271	NA
ENSG00000070915	SLC12A3	12.3979	0.00253622	1.064	0.00238367	0.998098	0.999883
ENSG00000070950	RAD18	1276.67	0.0970592	0.620665	0.156379	0.875734	0.964316
ENSG00000070961	ATP2B1	2192.33	0.275229	0.440025	0.625485	0.531653	0.831231
ENSG00000070985	TRPM5	11.9441	-0.102318	0.79325	-0.128986	0.897369	0.97098
ENSG00000071051	NCK2	5446.29	-0.0520211	0.140719	-0.369682	0.71162	0.91074
ENSG00000071054	MAP4K4	7748.93	0.464541	0.125878	3.69041	0.000223891	0.00918188
ENSG00000071073	MGAT4A	6631.74	-0.781427	0.518337	-1.50756	0.131666	0.477464
ENSG00000071082	RPL31	86986.9	-0.128164	0.243775	-0.52575	0.599062	0.866687
ENSG00000071127	WDR1	25737.3	0.86452	0.501055	1.7254	0.0844557	0.392927
ENSG00000071189	SNX13	1135.61	0.0120787	0.360123	0.0335406	0.973243	0.994641
ENSG00000071205	ARHGAP10	236.772	0.704658	0.404635	1.74146	0.0816023	0.387624
ENSG00000071242	RPS6KA2	1337.83	-0.753971	0.397471	-1.89692	0.0578386	0.327509
ENSG00000071243	ING3	1249.89	0.208353	0.330066	0.631245	0.52788	0.82914
ENSG00000071246	VASH1	1122.81	-0.412636	0.347589	-1.18714	0.235174	0.610566
ENSG00000071282	LMCD1	120.58	0.851174	0.966751	0.880448	0.378617	0.733927
ENSG00000071462	BUD23	6221.35	1.21434	0.422518	2.87405	0.00405243	0.0708871
ENSG00000071537	SEL1L	3581.96	0.342602	0.377873	0.906657	0.364588	0.723077
ENSG00000071539	TRIP13	913.375	0.773504	0.885401	0.87362	0.382325	0.735826
ENSG00000071553	ATP6AP1	4150.01	-0.530004	0.324857	-1.6315	0.102785	0.42772
ENSG00000071564	TCF3	6250.45	0.277532	0.367693	0.754792	0.450374	0.783062
ENSG00000071575	TRIB2	3900.68	-0.114555	0.366201	-0.312821	0.754417	0.926266
ENSG00000071626	DAZAP1	13994.4	0.630313	0.349276	1.80463	0.0711329	0.360282
ENSG00000071655	MBD3	9520.02	0.762624	0.512593	1.48778	0.13681	0.485729
ENSG00000071794	HLTF	1110.34	-1.00783	0.537744	-1.87419	0.0609048	0.335665
ENSG00000071859	FAM50A	3231.14	-0.174714	0.353119	-0.494772	0.620761	0.875149
ENSG00000071889	FAM3A	2655.22	-0.184785	0.315448	-0.585787	0.558019	0.846257
ENSG00000071894	CPSF1	6846.21	0.111465	0.299621	0.372021	0.709877	0.909914
ENSG00000071909	MYO3B	15.6686	-0.628023	0.733858	-0.855783	0.392118	0.741978
ENSG00000071967	CYBRD1	100.785	-0.164886	0.450306	-0.366164	0.714243	0.911804
ENSG00000071991	CDH19	4.77442	1.6426	1.1232	1.46243	0.143624	NA
ENSG00000071994	PDCD2	5868.86	0.601291	0.347058	1.73254	0.0831782	0.390065
ENSG00000072042	RDH11	3212.17	-0.0268158	0.206445	-0.129893	0.896651	0.970614
ENSG00000072062	PRKACA	3570.23	-0.512736	0.449127	-1.14163	0.253608	0.630038
ENSG00000072071	ADGRL1	2623.53	-0.27644	0.251633	-1.09859	0.271949	0.646488
ENSG00000072080	SPP2	4.81648	-0.97048	1.05173	-0.922744	0.356141	NA
ENSG00000072110	ACTN1	10379.7	-1.39105	0.347049	-4.00823	6.11763e-05	0.00343827
ENSG00000072121	ZFYVE26	1632.63	-0.219201	0.2432	-0.901319	0.367418	0.724037
ENSG00000072133	RPS6KA6	61.0024	0.132384	0.40803	0.324446	0.7456	0.922582
ENSG00000072134	EPN2	309.713	0.0452903	0.248543	0.182224	0.855407	0.958153
ENSG00000072135	PTPN18	3953.55	-0.813483	0.392174	-2.07429	0.0380523	0.264665
ENSG00000072163	LIMS2	1074.38	-1.65256	0.457048	-3.61574	0.000299495	0.0113221
ENSG00000072182	ASIC4	27.6111	-0.326065	0.7643	-0.426619	0.669657	0.895208
ENSG00000072195	SPEG	572.355	-0.867801	0.559987	-1.54968	0.121218	0.461545
ENSG00000072201	LNX1	163.481	-0.233668	0.561308	-0.416292	0.677196	0.897464
ENSG00000072210	ALDH3A2	1514.26	-0.856003	0.299985	-2.85348	0.00432428	0.0732583
ENSG00000072274	TFRC	7672.72	0.994555	0.689986	1.44141	0.149468	0.5052
ENSG00000072310	SREBF1	2966.46	1.59957	0.296126	5.40164	6.60347e-08	1.11661e-05
ENSG00000072315	TRPC5	1.56979	0.875213	1.76014	0.497242	0.619019	NA
ENSG00000072364	AFF4	3412.21	0.116568	0.388535	0.300019	0.764162	0.930347
ENSG00000072401	UBE2D1	1119.88	0.849388	0.373257	2.27561	0.0228694	0.203134
ENSG00000072415	MPP5	806.484	-0.468214	0.414615	-1.12927	0.258782	0.635157
ENSG00000072422	RHOBTB1	15.1863	-1.50692	0.920132	-1.63772	0.10148	0.425537
ENSG00000072501	SMC1A	8862.7	0.177441	0.557644	0.318198	0.750334	0.924488
ENSG00000072506	HSD17B10	4064.99	0.941876	0.622302	1.51353	0.130144	0.475161
ENSG00000072518	MARK2	3833.2	0.0838664	0.229211	0.365891	0.714446	0.911814
ENSG00000072571	HMMR	412.133	0.371696	1.23248	0.301585	0.762969	0.929901
ENSG00000072609	CHFR	3672.55	-0.155842	0.149159	-1.0448	0.296115	0.667808
ENSG00000072657	TRHDE	17.4413	-0.19802	0.632139	-0.313254	0.754088	0.92609
ENSG00000072682	P4HA2	99.448	0.0916478	0.481504	0.190337	0.849045	0.955034
ENSG00000072694	FCGR2B	396.384	3.75679	0.834278	4.50305	6.69859e-06	0.000589855
ENSG00000072736	NFATC3	5241.1	0.012187	0.282918	0.0430762	0.965641	0.99226
ENSG00000072756	TRNT1	1483.13	0.662402	0.279509	2.36988	0.017794	0.176241
ENSG00000072778	ACADVL	6696.13	-0.0931267	0.338709	-0.274946	0.783358	0.935638
ENSG00000072786	STK10	11715.8	-0.551949	0.295417	-1.86837	0.0617099	0.338423
ENSG00000072803	FBXW11	2470.25	0.202102	0.217217	0.930415	0.352156	0.714757
ENSG00000072818	ACAP1	12757.9	-0.877878	0.33455	-2.62405	0.00868901	0.114423
ENSG00000072832	CRMP1	7.7404	1.58829	0.909412	1.7465	0.0807237	NA
ENSG00000072840	EVC	28.3343	-0.346188	0.888983	-0.38942	0.696966	0.904393
ENSG00000072849	DERL2	2599.06	0.562655	0.239052	2.35369	0.0185881	0.181335
ENSG00000072858	SIDT1	1910.86	-0.53604	0.33095	-1.6197	0.105297	0.432051
ENSG00000072864	NDE1	2022.39	0.0051258	0.428734	0.0119557	0.990461	0.997825
ENSG00000072952	MRVI1	4.94059	-1.3039	1.43619	-0.907888	0.363937	NA
ENSG00000072954	TMEM38A	61.0399	-0.0153923	0.458583	-0.0335649	0.973224	0.994641
ENSG00000072958	AP1M1	6817.47	-0.543702	0.362207	-1.50108	0.133335	0.480401
ENSG00000073008	PVR	382.05	1.26638	0.656266	1.92968	0.0536463	0.317322
ENSG00000073050	XRCC1	2390.59	-0.485051	0.277177	-1.74997	0.0801233	0.383124
ENSG00000073060	SCARB1	559.303	-0.527596	0.582162	-0.90627	0.364793	0.723283
ENSG00000073067	CYP2W1	5.85564	-2.40856	1.30571	-1.84464	0.0650906	NA
ENSG00000073111	MCM2	8853.97	-0.0284157	0.799635	-0.0355359	0.971652	0.994407
ENSG00000073146	MOV10L1	3.76676	0.293314	1.05024	0.279283	0.780028	NA
ENSG00000073150	PANX2	69.1446	-1.15904	0.731531	-1.5844	0.113103	0.447053
ENSG00000073169	SELENOO	2815.62	-0.303275	0.216027	-1.40388	0.160355	0.520728
ENSG00000073282	TP63	7.85526	0.485954	1.03812	0.468109	0.639706	NA
ENSG00000073331	ALPK1	1366.86	1.63704	0.24942	6.56339	5.25969e-11	2.15324e-08
ENSG00000073350	LLGL2	1375.02	-0.785146	0.334092	-2.35009	0.0187689	0.182288
ENSG00000073417	PDE8A	1139.89	-0.499336	0.278868	-1.79058	0.0733609	0.366177
ENSG00000073464	CLCN4	29.7261	-0.43058	0.950913	-0.452807	0.650688	0.887578
ENSG00000073536	NLE1	2696.93	1.21683	0.626728	1.94156	0.0521908	0.312518
ENSG00000073578	SDHA	6972.76	0.443389	0.344199	1.28817	0.197685	0.567994
ENSG00000073584	SMARCE1	6040.35	0.147534	0.275398	0.535714	0.592156	0.864413
ENSG00000073598	FNDC8	21.6251	0.141735	0.560737	0.252766	0.800449	0.940372
ENSG00000073605	GSDMB	2084.8	-0.355346	0.448307	-0.792639	0.427988	0.766604
ENSG00000073614	KDM5A	4603.47	0.272245	0.253995	1.07185	0.283786	0.657952
ENSG00000073670	ADAM11	35.4138	-0.958212	0.656794	-1.45892	0.144586	0.497639
ENSG00000073711	PPP2R3A	96.7431	-0.848788	0.558609	-1.51947	0.128645	0.472818
ENSG00000073712	FERMT2	39.902	-1.13649	0.479763	-2.36885	0.0178435	0.176486
ENSG00000073734	ABCB11	18.0076	-0.26087	1.56466	-0.166726	0.867586	0.961817
ENSG00000073737	DHRS9	45.8927	0.156312	1.17058	0.133534	0.893771	0.969858
ENSG00000073756	PTGS2	37.9314	1.58172	0.585541	2.70129	0.00690707	0.0996534
ENSG00000073792	IGF2BP2	94.1297	-0.0504624	0.447117	-0.112862	0.91014	0.975694
ENSG00000073803	MAP3K13	884.193	0.622747	0.27294	2.28163	0.0225112	0.201333
ENSG00000073849	ST6GAL1	13633.7	0.00880736	0.241279	0.0365028	0.970881	0.994186
ENSG00000073861	TBX21	4710.15	4.97681	0.911056	5.46268	4.68988e-08	8.29078e-06
ENSG00000073905	VDAC1P1	2.07201	-1.16302	2.00374	-0.580426	0.561627	NA
ENSG00000073910	FRY	722.021	-0.905706	0.615447	-1.47162	0.141123	0.492141
ENSG00000073921	PICALM	3906.58	-0.0187182	0.380743	-0.0491623	0.96079	0.991467
ENSG00000073969	NSF	1288.19	-0.279341	0.266202	-1.04936	0.294013	0.665466
ENSG00000074054	CLASP1	2821.5	-0.476329	0.334599	-1.42358	0.154568	0.511882
ENSG00000074071	MRPS34	6068.6	0.0597973	0.507021	0.117939	0.906116	0.97416
ENSG00000074181	NOTCH3	17.9443	-0.679123	0.694845	-0.977374	0.328384	0.694968
ENSG00000074201	CLNS1A	5241.65	0.0563183	0.234956	0.239698	0.810565	0.943064
ENSG00000074211	PPP2R2C	7.21277	-1.87783	0.926015	-2.02786	0.0425749	NA
ENSG00000074219	TEAD2	33.3117	0.206773	0.533646	0.387472	0.698407	0.904974
ENSG00000074266	EED	3156.17	0.22222	0.401617	0.553313	0.580049	0.857379
ENSG00000074276	CDHR2	45.8131	-1.1111	0.674736	-1.64672	0.0996163	0.421648
ENSG00000074317	SNCB	0.938171	2.81661	3.57206	0.788511	0.430398	NA
ENSG00000074319	TSG101	2260.31	0.357974	0.24419	1.46597	0.142658	0.494785
ENSG00000074356	NCBP3	3296.92	0.347099	0.288866	1.20159	0.229522	0.605049
ENSG00000074370	ATP2A3	14357.9	-0.683953	0.396453	-1.72518	0.0844951	0.392927
ENSG00000074410	CA12	22.2978	-0.176925	0.637055	-0.277723	0.781225	0.935346
ENSG00000074416	MGLL	340.588	0.898621	0.454298	1.97804	0.0479242	0.298535
ENSG00000074527	NTN4	30.9089	-0.835279	0.519089	-1.60912	0.107589	0.437386
ENSG00000074582	BCS1L	1697.37	0.0195603	0.342689	0.0570789	0.954482	0.98993
ENSG00000074590	NUAK1	5.68919	-1.845	1.11886	-1.649	0.0991471	NA
ENSG00000074603	DPP8	2730.84	-0.083949	0.336455	-0.24951	0.802966	0.941188
ENSG00000074621	SLC24A1	514.69	0.271987	0.215984	1.25929	0.207925	0.578409
ENSG00000074657	ZNF532	233.729	-0.712932	0.353789	-2.01513	0.0438907	0.285218
ENSG00000074660	SCARF1	158.49	0.544771	0.411629	1.32345	0.185685	0.553593
ENSG00000074695	LMAN1	5535.95	0.756774	0.500229	1.51285	0.130317	0.475443
ENSG00000074696	HACD3	2747.35	-0.00773347	0.326866	-0.0236595	0.981124	0.996397
ENSG00000074706	IPCEF1	3632.35	1.08422	0.313424	3.45926	0.000541658	0.0173879
ENSG00000074755	ZZEF1	5307.98	-0.146662	0.248638	-0.589862	0.555283	0.844469
ENSG00000074800	ENO1	123558	1.75045	0.820967	2.13218	0.0329924	0.245819
ENSG00000074803	SLC12A1	10.6209	-1.64069	1.15704	-1.41801	0.156187	0.514386
ENSG00000074842	MYDGF	4544.17	1.13431	0.451912	2.51002	0.0120725	0.138433
ENSG00000074855	ANO8	714.461	-1.1451	0.386096	-2.96585	0.00301844	0.0583557
ENSG00000074935	TUBE1	2054.82	0.656442	0.293786	2.23442	0.0254555	0.215375
ENSG00000074964	ARHGEF10L	8.80798	-0.462092	1.04517	-0.442123	0.6584	0.891325
ENSG00000074966	TXK	2383.2	-0.344954	0.514202	-0.670854	0.502314	0.814671
ENSG00000075035	WSCD2	4.78381	-2.20664	1.75952	-1.25412	0.2098	NA
ENSG00000075043	KCNQ2	16.9398	-2.64863	1.15364	-2.2959	0.0216818	0.197096
ENSG00000075073	TACR2	22.7124	0.492446	0.55782	0.882804	0.377342	0.732857
ENSG00000075089	ACTR6	1486.53	0.00154516	0.521829	0.00296106	0.997637	0.999671
ENSG00000075131	TIPIN	816.148	0.674498	0.590782	1.1417	0.253577	0.630038
ENSG00000075142	SRI	3693.16	0.707175	0.422031	1.67565	0.0938071	0.41
ENSG00000075151	EIF4G3	1565.65	1.56635	0.481339	3.25416	0.00113728	0.0299193
ENSG00000075188	NUP37	1296.41	0.140167	0.501386	0.27956	0.779815	0.935341
ENSG00000075213	SEMA3A	18.297	-1.19065	1.20007	-0.992147	0.321126	0.689433
ENSG00000075218	GTSE1	802.791	0.452812	0.885866	0.511151	0.609245	0.870217
ENSG00000075223	SEMA3C	86.1273	0.228426	0.613715	0.372202	0.709742	0.909891
ENSG00000075234	TTC38	443.383	-0.566469	0.445428	-1.27174	0.203465	0.573226
ENSG00000075239	ACAT1	1510.04	-0.0151329	0.402083	-0.0376362	0.969978	0.993735
ENSG00000075240	GRAMD4	1973.78	0.984862	0.431474	2.28255	0.0224568	0.20124
ENSG00000075275	CELSR1	270.1	-0.79785	0.443499	-1.79899	0.0720201	0.362587
ENSG00000075290	WNT8B	16.6395	-1.01223	0.651588	-1.55349	0.120307	0.459771
ENSG00000075292	ZNF638	4265.46	-0.077941	0.571152	-0.136463	0.891456	0.96934
ENSG00000075303	SLC25A40	1511.01	-0.431951	0.28743	-1.5028	0.132889	0.479372
ENSG00000075336	TIMM21	1416.03	0.367463	0.420074	0.874757	0.381706	0.735781
ENSG00000075340	ADD2	1011.17	-0.410433	0.625199	-0.656483	0.511513	0.81951
ENSG00000075391	RASAL2	34.6876	-0.166214	0.918921	-0.18088	0.856462	0.958534
ENSG00000075399	VPS9D1	894.712	-0.102097	0.275254	-0.370918	0.710699	0.910267
ENSG00000075407	ZNF37A	1427.44	0.527243	0.396542	1.3296	0.183649	0.551391
ENSG00000075413	MARK3	4640.13	0.283555	0.225042	1.26001	0.207666	0.578129
ENSG00000075415	SLC25A3	20943.1	0.520429	0.461717	1.12716	0.259675	0.63605
ENSG00000075420	FNDC3B	730.537	1.30304	0.327648	3.97696	6.98017e-05	0.00377042
ENSG00000075426	FOSL2	5322.95	3.17409	0.863674	3.6751	0.000237755	0.0096196
ENSG00000075461	CACNG4	2.16645	-0.594153	1.38757	-0.428195	0.668509	NA
ENSG00000075539	FRYL	4124.22	0.47614	0.404293	1.17771	0.238913	0.614962
ENSG00000075568	TMEM131	2829.31	-0.490601	0.320829	-1.52917	0.126223	0.46909
ENSG00000075618	FSCN1	3324.33	3.66881	0.754833	4.86043	1.17134e-06	0.000138046
ENSG00000075624	ACTB	388343	1.43107	0.586137	2.44153	0.014625	0.155832
ENSG00000075643	MOCOS	51.0406	0.198486	0.461934	0.429686	0.667424	0.894835
ENSG00000075651	PLD1	73.6658	-1.18355	0.531733	-2.22584	0.0260252	0.217614
ENSG00000075673	ATP12A	19.2402	1.53469	1.08263	1.41755	0.156321	0.514493
ENSG00000075702	WDR62	575.289	0.144516	0.713483	0.20255	0.839487	0.95196
ENSG00000075711	DLG1	2307.62	0.0264122	0.346411	0.0762454	0.939224	0.984582
ENSG00000075785	RAB7A	11123.4	0.280524	0.328879	0.85297	0.393676	0.74354
ENSG00000075790	BCAP29	907.666	0.26711	0.52093	0.512756	0.608122	0.869877
ENSG00000075826	SEC31B	1670.96	-0.357785	0.466603	-0.766787	0.443208	0.777847
ENSG00000075856	SART3	5010.48	0.0451807	0.269185	0.167843	0.866707	0.96155
ENSG00000075884	ARHGAP15	3893.91	0.352698	0.407838	0.8648	0.387149	0.738385
ENSG00000075886	TUBA3D	108.453	-0.834723	0.371185	-2.2488	0.024525	0.210788
ENSG00000075891	PAX2	1.40297	2.15883	3.03445	0.711441	0.476811	NA
ENSG00000075914	EXOSC7	2019.94	0.222414	0.357592	0.621977	0.533957	0.832501
ENSG00000075945	KIFAP3	1173.1	0.236993	0.219197	1.08119	0.279612	0.653455
ENSG00000075975	MKRN2	2077.06	-0.131088	0.157371	-0.832988	0.404852	0.75103
ENSG00000076003	MCM6	6572.65	0.142207	0.626741	0.2269	0.820502	0.945852
ENSG00000076043	REXO2	1936.65	-0.0780448	0.172317	-0.452913	0.650612	0.887526
ENSG00000076053	RBM7	2204.32	0.757892	0.354198	2.13974	0.0323755	0.243933
ENSG00000076067	RBMS2	350.949	-0.593246	0.413431	-1.43493	0.151306	0.507275
ENSG00000076108	BAZ2A	6871.02	0.0416886	0.247218	0.168631	0.866087	0.961493
ENSG00000076201	PTPN23	2504.77	-0.190381	0.331408	-0.574463	0.565655	0.84901
ENSG00000076242	MLH1	2489.87	0.28184	0.376347	0.748882	0.453928	0.785613
ENSG00000076248	UNG	2710.83	-0.338215	0.596005	-0.56747	0.570395	0.851809
ENSG00000076258	FMO4	139.521	-0.957976	0.405302	-2.36361	0.0180978	0.177965
ENSG00000076321	KLHL20	1012.61	-0.154556	0.390753	-0.395533	0.692449	0.903001
ENSG00000076344	RGS11	9.00634	-0.35622	0.76042	-0.468452	0.639462	0.882945
ENSG00000076351	SLC46A1	445.539	-0.412098	0.301366	-1.36743	0.171489	0.536447
ENSG00000076356	PLXNA2	51.9361	0.870958	0.754455	1.15442	0.248328	0.624563
ENSG00000076382	SPAG5	1328.5	-0.136027	0.648281	-0.209827	0.833803	0.950069
ENSG00000076513	ANKRD13A	4118.29	-0.125092	0.211782	-0.590664	0.554746	0.844208
ENSG00000076554	TPD52	1277.73	-0.453538	0.343621	-1.31988	0.186876	0.554828
ENSG00000076555	ACACB	1048.34	-0.629542	0.306818	-2.05184	0.0401854	0.271971
ENSG00000076604	TRAF4	3357.37	2.25794	0.68851	3.27946	0.00104005	0.0279281
ENSG00000076641	PAG1	7059.07	-0.29641	0.406625	-0.728951	0.466032	0.793186
ENSG00000076650	GPATCH1	1007.96	0.110271	0.172251	0.640176	0.522058	0.825829
ENSG00000076662	ICAM3	10577.2	-0.622803	0.403272	-1.54437	0.122498	0.463352
ENSG00000076685	NT5C2	2855.72	-0.188474	0.244939	-0.769475	0.441611	0.776622
ENSG00000076706	MCAM	135.912	-0.0400039	0.634187	-0.063079	0.949704	0.98839
ENSG00000076716	GPC4	6.07568	-1.6639	0.895746	-1.85755	0.0632323	NA
ENSG00000076770	MBNL3	1369.95	-0.198115	0.358414	-0.552754	0.580432	0.857471
ENSG00000076826	CAMSAP3	56.5181	-0.49004	0.755327	-0.648779	0.516481	0.822794
ENSG00000076864	RAP1GAP	24.0876	1.5128	0.850419	1.77888	0.0752588	0.370389
ENSG00000076924	XAB2	6944.69	0.0156999	0.347986	0.0451164	0.964015	0.991812
ENSG00000076928	ARHGEF1	27890.1	-0.162502	0.301266	-0.539399	0.589612	0.863123
ENSG00000076944	STXBP2	4996.27	0.216542	0.369203	0.586512	0.557532	0.845982
ENSG00000076984	MAP2K7	4126.91	-0.167547	0.277706	-0.603324	0.546293	0.839717
ENSG00000077044	DGKD	6212.8	-0.599966	0.435052	-1.37907	0.167874	0.532231
ENSG00000077063	CTTNBP2	19.4444	-2.98653	1.32271	-2.25788	0.0239529	0.208463
ENSG00000077092	RARB	16.3592	-0.848685	0.677342	-1.25296	0.210219	0.581353
ENSG00000077097	TOP2B	8078.62	-0.295031	0.533795	-0.552704	0.580466	0.857471
ENSG00000077147	TM9SF3	7225.92	0.399407	0.436733	0.914533	0.360437	0.72099
ENSG00000077150	NFKB2	14085.8	2.59104	0.481585	5.38022	7.43929e-08	1.23657e-05
ENSG00000077152	UBE2T	1316	-0.294861	0.801334	-0.367963	0.712901	0.911237
ENSG00000077157	PPP1R12B	816.242	-0.660329	0.381539	-1.7307	0.0835055	0.390941
ENSG00000077232	DNAJC10	3296.66	0.389855	0.481549	0.809586	0.418178	0.760449
ENSG00000077235	GTF3C1	3704.64	-0.223392	0.311116	-0.718035	0.472736	0.798039
ENSG00000077238	IL4R	14386	0.789057	0.448376	1.75981	0.0784397	0.379591
ENSG00000077254	USP33	3698.04	0.0244281	0.417972	0.0584444	0.953395	0.9897
ENSG00000077264	PAK3	44.1847	1.23445	0.411858	2.99727	0.00272406	0.0543762
ENSG00000077279	DCX	3.64189	0.855819	1.12616	0.759948	0.447286	NA
ENSG00000077312	SNRPA	5545.72	0.0229721	0.573967	0.0400233	0.968075	0.993068
ENSG00000077327	SPAG6	3.77691	0.0202311	1.48301	0.0136419	0.989116	NA
ENSG00000077348	EXOSC5	1997.29	0.677889	0.438139	1.5472	0.121815	0.462312
ENSG00000077380	DYNC1I2	3341.98	0.343456	0.250644	1.3703	0.170594	0.535213
ENSG00000077420	APBB1IP	5122.42	-0.143001	0.197461	-0.724199	0.468943	0.795518
ENSG00000077454	LRCH4	6711.64	-0.751531	0.361267	-2.08026	0.0375014	0.262004
ENSG00000077458	FAM76B	1833.53	-0.439492	0.592624	-0.741603	0.458328	0.788747
ENSG00000077463	SIRT6	1406.77	0.790128	0.418505	1.88798	0.059029	0.33056
ENSG00000077498	TYR	4.11983	0.288953	1.12327	0.257243	0.796991	NA
ENSG00000077514	POLD3	1444.04	-0.264264	0.563511	-0.46896	0.639098	0.882716
ENSG00000077522	ACTN2	5.81736	1.4899	1.28913	1.15574	0.247787	NA
ENSG00000077549	CAPZB	15465.1	0.179	0.353751	0.506006	0.612853	0.871529
ENSG00000077585	GPR137B	526.17	0.221637	0.267855	0.827452	0.407981	0.752797
ENSG00000077616	NAALAD2	71.523	0.227383	0.526269	0.432066	0.665694	0.894801
ENSG00000077684	JADE1	4156.13	-0.0882472	0.218886	-0.403165	0.686827	0.901412
ENSG00000077713	SLC25A43	254.217	-0.0760165	0.372811	-0.203901	0.838431	0.951502
ENSG00000077721	UBE2A	2689.58	0.342259	0.331718	1.03178	0.302176	0.673217
ENSG00000077782	FGFR1	405.089	0.0148233	0.337965	0.0438604	0.965016	0.991935
ENSG00000077800	FKBP6	46.7455	-0.145643	0.758111	-0.192114	0.847653	0.954679
ENSG00000077935	SMC1B	77.6441	0.798758	0.376094	2.12383	0.0336846	0.249138
ENSG00000077942	FBLN1	50.2924	0.128064	0.328027	0.390408	0.696235	0.904277
ENSG00000077943	ITGA8	13.4311	-0.792865	0.75684	-1.0476	0.294824	0.666394
ENSG00000077984	CST7	747.844	1.42038	0.540831	2.62629	0.00863217	0.114061
ENSG00000078018	MAP2	23.5944	1.84283	0.811674	2.2704	0.0231833	0.204812
ENSG00000078043	PIAS2	1669.79	0.0176422	0.377069	0.0467877	0.962682	0.991596
ENSG00000078053	AMPH	36.9846	-1.54724	0.55382	-2.79375	0.00521002	0.0828173
ENSG00000078061	ARAF	5633.37	0.259342	0.383645	0.675995	0.499044	0.812517
ENSG00000078070	MCCC1	1140.91	-0.46636	0.175054	-2.6641	0.00771951	0.106842
ENSG00000078081	LAMP3	1320.91	2.77716	0.582982	4.76371	1.90061e-06	0.000202515
ENSG00000078098	FAP	4.62523	-0.750408	1.05846	-0.708964	0.478347	NA
ENSG00000078114	NEBL	50.0931	2.19883	0.882426	2.4918	0.0127098	0.142314
ENSG00000078124	ACER3	675.167	-0.254558	0.371798	-0.684668	0.493553	0.80901
ENSG00000078140	UBE2K	4435.74	0.651485	0.364141	1.7891	0.0735987	0.366703
ENSG00000078142	PIK3C3	2014.85	0.248972	0.252866	0.984602	0.32482	0.692462
ENSG00000078177	N4BP2	812.187	-0.0598216	0.71307	-0.083893	0.933142	0.983352
ENSG00000078237	TIGAR	554.319	0.88412	0.613591	1.44089	0.149615	0.505466
ENSG00000078246	TULP3	490.266	-0.367854	0.246119	-1.49462	0.135014	0.483509
ENSG00000078269	SYNJ2	3187	2.50485	0.522895	4.79036	1.66484e-06	0.000181537
ENSG00000078295	ADCY2	35.984	0.818326	0.530198	1.54344	0.122725	0.463622
ENSG00000078304	PPP2R5C	10361.6	-0.110454	0.162484	-0.67978	0.496644	0.810558
ENSG00000078319	PMS2P1	664.183	0.719984	0.37962	1.89659	0.0578823	0.327538
ENSG00000078328	RBFOX1	5.18379	1.5367	0.876346	1.75353	0.0795111	NA
ENSG00000078369	GNB1	18210.6	0.371741	0.370631	1.003	0.315863	0.684583
ENSG00000078399	HOXA9	88.9316	-0.731139	0.562294	-1.30028	0.193506	0.563361
ENSG00000078401	EDN1	40.3822	-0.020763	0.596684	-0.0347974	0.972241	0.994444
ENSG00000078403	MLLT10	2176.52	-0.721046	0.244984	-2.94324	0.00324796	0.0613196
ENSG00000078487	ZCWPW1	622.514	-0.435318	0.438507	-0.992727	0.320843	0.689092
ENSG00000078579	FGF20	1.87724	-0.98908	2.42596	-0.407706	0.683489	NA
ENSG00000078589	P2RY10	1524.17	-0.0074561	0.336115	-0.0221832	0.982302	0.996507
ENSG00000078596	ITM2A	6168.66	-0.142206	0.15362	-0.925701	0.354601	0.716298
ENSG00000078618	NRDC	5604.03	0.236411	0.200885	1.17685	0.239257	0.615213
ENSG00000078668	VDAC3	5247.51	-0.314757	0.324609	-0.969651	0.332221	0.697071
ENSG00000078674	PCM1	5354.99	-0.160937	0.586271	-0.274509	0.783693	0.935638
ENSG00000078687	TNRC6C	4100.77	-0.645087	0.329704	-1.95656	0.0503988	0.307064
ENSG00000078699	CBFA2T2	2639.3	-0.56136	0.357021	-1.57234	0.115871	0.452072
ENSG00000078747	ITCH	2904.55	-0.201496	0.216762	-0.929572	0.352593	0.714962
ENSG00000078795	PKD2L2	40.3526	0.166288	0.473273	0.351357	0.725321	0.916059
ENSG00000078804	TP53INP2	150.685	1.32188	0.512183	2.58086	0.00985533	0.122067
ENSG00000078808	SDF4	11081.5	0.683608	0.403897	1.69253	0.0905449	0.405087
ENSG00000078814	MYH7B	169.678	-0.666182	0.405649	-1.64226	0.100536	0.423238
ENSG00000078900	TP73	123.575	-0.533244	0.833604	-0.639685	0.522377	0.82597
ENSG00000078902	TOLLIP	3608.64	0.346037	0.396853	0.871953	0.383234	0.736158
ENSG00000078967	UBE2D4	879.568	0.288342	0.294357	0.979565	0.327301	0.694228
ENSG00000079101	CLUL1	8.75253	0.00790898	0.878426	0.00900359	0.992816	0.998561
ENSG00000079102	RUNX1T1	3.37477	0.526345	1.91091	0.275443	0.782976	NA
ENSG00000079112	CDH17	11.5485	0.814236	0.817893	0.99553	0.319479	0.687763
ENSG00000079134	THOC1	2450.21	0.493346	0.435426	1.13302	0.257206	0.634049
ENSG00000079150	FKBP7	102.425	0.327272	0.479715	0.682222	0.495098	0.809806
ENSG00000079156	OSBPL6	96.8042	-1.02718	0.308296	-3.33179	0.0008629	0.024552
ENSG00000079215	SLC1A3	17.5831	1.06887	0.798021	1.3394	0.180439	0.548107
ENSG00000079246	XRCC5	21268.9	0.818122	0.442341	1.84953	0.0643818	0.344734
ENSG00000079257	LXN	305.361	-0.410041	0.391322	-1.04784	0.294715	0.666392
ENSG00000079263	SP140	2297.19	1.55593	0.266549	5.83731	5.30518e-09	1.33114e-06
ENSG00000079277	MKNK1	1737.84	-0.298986	0.173628	-1.72199	0.0850713	0.393802
ENSG00000079308	TNS1	42.6936	0.661061	1.10662	0.597368	0.550261	0.841549
ENSG00000079313	REXO1	4457.75	0.407483	0.239529	1.70118	0.0889083	0.401213
ENSG00000079332	SAR1A	6159.04	0.44738	0.224745	1.99061	0.0465234	0.294127
ENSG00000079335	CDC14A	2161.86	-0.523451	0.624833	-0.837745	0.402174	0.748802
ENSG00000079337	RAPGEF3	88.8666	-0.0882556	0.536269	-0.164573	0.86928	0.962452
ENSG00000079385	CEACAM1	793.614	0.53592	0.29318	1.82796	0.0675561	0.35225
ENSG00000079387	SENP1	1580.26	0.285179	0.399286	0.714221	0.47509	0.799296
ENSG00000079393	DUSP13	0.913688	0	3.65938	0	1	NA
ENSG00000079432	CIC	4904.28	-0.154315	0.301429	-0.511947	0.608688	0.869916
ENSG00000079435	LIPE	1100.59	-0.83668	0.448599	-1.86509	0.0621683	0.34006
ENSG00000079459	FDFT1	8109.38	0.191384	0.373481	0.512432	0.608349	0.869916
ENSG00000079462	PAFAH1B3	1548.69	0.0381021	0.571333	0.0666899	0.946829	0.987224
ENSG00000079482	OPHN1	586.026	-0.25154	0.473855	-0.530837	0.595532	0.865705
ENSG00000079616	KIF22	5410.85	-0.35887	0.466202	-0.769774	0.441434	0.776566
ENSG00000079691	CARMIL1	480.338	-0.569153	0.358846	-1.58607	0.112724	0.446707
ENSG00000079739	PGM1	1681.96	-0.120192	0.465996	-0.257924	0.796466	0.938934
ENSG00000079785	DDX1	4090.04	0.171404	0.354077	0.484089	0.628323	0.877749
ENSG00000079805	DNM2	13388.3	-0.282922	0.296158	-0.955305	0.339423	0.703664
ENSG00000079819	EPB41L2	986.282	1.21735	0.403498	3.01698	0.00255306	0.0518952
ENSG00000079841	RIMS1	5.2252	0.0941962	0.998501	0.0943376	0.924841	NA
ENSG00000079931	MOXD1	5.35198	2.96942	1.29923	2.28552	0.0222823	NA
ENSG00000079950	STX7	1340.64	-0.314041	0.340107	-0.92336	0.35582	0.717327
ENSG00000079974	RABL2B	2231.3	-0.436233	0.229758	-1.89867	0.0576082	0.326839
ENSG00000079999	KEAP1	4234.2	0.648048	0.484507	1.33754	0.181046	0.548424
ENSG00000080007	DDX43	48.7548	0.375154	0.526224	0.712916	0.475897	0.799889
ENSG00000080031	PTPRH	12.5119	1.06501	0.741083	1.43711	0.150688	0.506615
ENSG00000080166	DCT	95.9296	-1.06893	1.30616	-0.81838	0.41314	0.756209
ENSG00000080189	SLC35C2	4382.49	-0.0843855	0.259987	-0.324576	0.745502	0.922582
ENSG00000080200	CRYBG3	150.27	-1.27673	0.912953	-1.39847	0.161973	0.523497
ENSG00000080224	EPHA6	0.707114	-2.65019	6.28772	-0.421486	0.6734	NA
ENSG00000080293	SCTR	2.94143	1.09231	1.41147	0.773878	0.439003	NA
ENSG00000080298	RFX3	820.974	-0.172592	0.287843	-0.599606	0.548769	0.840978
ENSG00000080345	RIF1	3986.42	0.354325	0.631144	0.561401	0.574524	0.853871
ENSG00000080371	RAB21	4148.89	0.573458	0.341015	1.68162	0.0926419	0.408524
ENSG00000080493	SLC4A4	20.4952	-0.454995	0.691755	-0.65774	0.510705	0.818946
ENSG00000080503	SMARCA2	6725.39	-0.658539	0.334807	-1.96692	0.0491923	0.303517
ENSG00000080511	RDH8	5.01411	0.445116	0.976073	0.456028	0.64837	NA
ENSG00000080546	SESN1	2294.39	-0.256227	0.483099	-0.530383	0.595847	0.865705
ENSG00000080561	MID2	266.549	0.437073	0.404689	1.08002	0.280131	0.653868
ENSG00000080572	PIH1D3	1.98493	-1.79614	1.84402	-0.974038	0.330038	NA
ENSG00000080573	COL5A3	56.6723	1.81102	0.72424	2.50059	0.0123988	0.140655
ENSG00000080603	SRCAP	4889.2	0.395316	0.500015	0.790608	0.429173	0.767804
ENSG00000080608	PUM3	2933.43	2.03615	0.603009	3.37665	0.00073374	0.0217558
ENSG00000080618	CPB2	2.69477	-1.23715	1.46322	-0.845499	0.397832	NA
ENSG00000080644	CHRNA3	9.23095	2.81538	1.29482	2.17434	0.0296799	0.232666
ENSG00000080709	KCNN2	4.26004	0.452112	1.49067	0.303295	0.761665	NA
ENSG00000080802	CNOT4	1100.13	0.270897	0.188646	1.43601	0.151	0.507063
ENSG00000080815	PSEN1	2424.58	0.0703552	0.250175	0.281223	0.778539	0.934993
ENSG00000080819	CPOX	2247.31	-0.211339	0.403263	-0.524072	0.600228	0.867096
ENSG00000080822	CLDND1	6065.65	0.427506	0.298987	1.42985	0.15276	0.509011
ENSG00000080823	MOK	209.951	0.162377	0.485243	0.334631	0.737903	0.920786
ENSG00000080824	HSP90AA1	65085.7	1.42587	0.711126	2.00508	0.0449542	0.288805
ENSG00000080839	RBL1	1334.75	-0.507508	0.510811	-0.993533	0.32045	0.688555
ENSG00000080845	DLGAP4	2380.82	-0.538193	0.343712	-1.56583	0.117389	0.454737
ENSG00000080854	IGSF9B	284.251	0.863484	0.43668	1.97738	0.0479984	0.298769
ENSG00000080910	CFHR2	4.09236	-0.931778	1.30905	-0.711799	0.476589	NA
ENSG00000080947	CROCCP3	446.19	-1.20485	0.576721	-2.08914	0.0366948	0.259398
ENSG00000080986	NDC80	672.881	1.00494	0.772897	1.30022	0.193524	0.563361
ENSG00000081014	AP4E1	930.072	0.289969	0.355301	0.816124	0.414429	0.757358
ENSG00000081019	RSBN1	3153.32	-0.118318	0.233384	-0.506967	0.612178	0.871472
ENSG00000081026	MAGI3	284.676	-1.12156	0.505599	-2.21828	0.0265357	0.21937
ENSG00000081041	CXCL2	14.924	1.00875	0.639242	1.57804	0.114556	0.449636
ENSG00000081052	COL4A4	38.7517	0.457176	0.433069	1.05567	0.291121	0.662871
ENSG00000081059	TCF7	32860.9	-0.608541	0.388023	-1.56831	0.116809	0.454074
ENSG00000081087	OSTM1	2341.95	0.138354	0.427086	0.323948	0.745977	0.922766
ENSG00000081138	CDH7	10.8113	0.44957	0.675051	0.665979	0.505424	0.816454
ENSG00000081148	IMPG2	84.7897	-0.985692	0.769721	-1.28058	0.20034	0.569707
ENSG00000081154	PCNP	8549.66	-0.127559	0.336224	-0.379386	0.704401	0.907891
ENSG00000081177	EXD2	643.264	-0.620944	0.278646	-2.22843	0.0258517	0.217231
ENSG00000081181	ARG2	143.525	1.42602	0.628735	2.26809	0.023324	0.205182
ENSG00000081189	MEF2C	146.066	0.0105767	0.73303	0.0144287	0.988488	0.997372
ENSG00000081237	PTPRC	42084.4	0.627016	0.431841	1.45196	0.146513	0.50043
ENSG00000081307	UBA5	2203.26	0.394678	0.403397	0.978387	0.327883	0.694664
ENSG00000081320	STK17B	18450	0.418307	0.369324	1.13263	0.25737	0.634077
ENSG00000081377	CDC14B	468.313	-1.66806	0.684355	-2.43742	0.0147923	0.156757
ENSG00000081386	ZNF510	710.665	-0.525013	0.543351	-0.96625	0.333919	0.698285
ENSG00000081479	LRP2	23.4064	0.382008	0.571603	0.66831	0.503936	0.815714
ENSG00000081665	ZNF506	2187.87	-0.622627	0.389607	-1.59809	0.110023	0.44151
ENSG00000081692	JMJD4	1739.9	0.583886	0.463619	1.25941	0.207883	0.578388
ENSG00000081721	DUSP12	1147.72	0.0830239	0.168323	0.493243	0.621841	0.875772
ENSG00000081760	AACS	1088	-0.293898	0.240288	-1.2231	0.22129	0.596338
ENSG00000081791	DELE1	2649.32	0.169048	0.26754	0.63186	0.527478	0.82898
ENSG00000081800	SLC13A1	2.00177	1.81431	1.35637	1.33762	0.181021	NA
ENSG00000081803	CADPS2	2.09229	-1.09693	2.23635	-0.4905	0.62378	NA
ENSG00000081818	PCDHB4	2.49949	-0.0943178	1.44015	-0.0654916	0.947783	NA
ENSG00000081853	PCDHGA2	1.84317	0.494519	2.33883	0.211439	0.832545	NA
ENSG00000081870	HSPB11	1447.23	-0.227519	0.353302	-0.643979	0.519589	0.824433
ENSG00000081913	PHLPP1	405.041	-0.154475	0.356551	-0.433248	0.664834	0.894744
ENSG00000081923	ATP8B1	143.617	-0.224173	0.407565	-0.55003	0.582299	0.858323
ENSG00000081985	IL12RB2	3184.26	4.59663	1.24252	3.69944	0.000216077	0.00890838
ENSG00000082014	SMARCD3	452.786	-0.589591	0.364676	-1.61675	0.105931	0.433455
ENSG00000082068	WDR70	1443.07	-0.192855	0.211239	-0.912971	0.361258	0.721278
ENSG00000082074	FYB1	23125.6	-0.669325	0.616191	-1.08623	0.277377	0.65202
ENSG00000082126	MPP4	14.0193	-0.473162	0.685035	-0.690712	0.489746	0.807992
ENSG00000082146	STRADB	972.474	-0.444812	0.204643	-2.1736	0.0297349	0.232732
ENSG00000082153	BZW1	16358.7	1.55677	0.658439	2.36433	0.0180625	0.177843
ENSG00000082196	C1QTNF3	198.895	-0.727639	0.635997	-1.14409	0.252586	0.629106
ENSG00000082212	ME2	5422.85	0.635723	0.355597	1.78776	0.0738142	0.366995
ENSG00000082213	C5orf22	1239.85	0.140977	0.337388	0.417847	0.676059	0.897221
ENSG00000082258	CCNT2	3200.88	-0.139613	0.586883	-0.237889	0.811967	0.943307
ENSG00000082269	FAM135A	328.903	-0.373965	0.423158	-0.883748	0.376833	0.732416
ENSG00000082293	COL19A1	27.8786	0.191718	0.654466	0.292938	0.769569	0.931688
ENSG00000082397	EPB41L3	391.143	-0.525423	0.398563	-1.31829	0.187405	0.555781
ENSG00000082438	COBLL1	32.9914	0.228943	0.818053	0.279863	0.779582	0.93523
ENSG00000082458	DLG3	628.012	0.200037	0.331014	0.604315	0.545634	0.839424
ENSG00000082482	KCNK2	1.86805	-1.71392	2.21952	-0.772205	0.439993	NA
ENSG00000082512	TRAF5	3068.5	-0.658157	0.396117	-1.66152	0.0966086	0.416569
ENSG00000082515	MRPL22	1502.73	0.571393	0.448225	1.27479	0.202384	0.572239
ENSG00000082516	GEMIN5	2018.55	0.701771	0.443836	1.58115	0.113844	0.448369
ENSG00000082556	OPRK1	2.72284	-1.31262	1.27313	-1.03102	0.302534	NA
ENSG00000082641	NFE2L1	5535.46	0.0516819	0.331043	0.156118	0.87594	0.964381
ENSG00000082684	SEMA5B	12.3393	0.0687784	0.662814	0.103767	0.917354	0.978108
ENSG00000082701	GSK3B	2217.68	-0.254311	0.376285	-0.675846	0.499138	0.812517
ENSG00000082781	ITGB5	37.2757	0.506358	0.779084	0.64994	0.515731	0.822371
ENSG00000082805	ERC1	1132.23	-0.0952371	0.306743	-0.310479	0.756197	0.927021
ENSG00000082898	XPO1	9693.54	-0.36952	0.418773	-0.882389	0.377567	0.733049
ENSG00000082996	RNF13	1468.33	-0.158148	0.391865	-0.403579	0.686522	0.901265
ENSG00000083067	TRPM3	16.7328	0.602899	0.579467	1.04044	0.298137	0.669528
ENSG00000083093	PALB2	733.3	0.384241	0.431564	0.890344	0.373281	0.729417
ENSG00000083097	DOP1A	997.647	-0.478413	0.597386	-0.800844	0.423222	0.76421
ENSG00000083099	LYRM2	1755.86	0.468442	0.425203	1.10169	0.270597	0.64518
ENSG00000083123	BCKDHB	731.266	-0.576736	0.363583	-1.58626	0.112681	0.446707
ENSG00000083168	KAT6A	7259.21	-0.10988	0.299299	-0.367123	0.713527	0.911273
ENSG00000083223	TUT7	1585.13	0.299806	0.486107	0.616749	0.5374	0.835331
ENSG00000083290	ULK2	848.568	-0.485197	0.287266	-1.68902	0.0912164	0.406442
ENSG00000083307	GRHL2	3.00968	0.0189265	1.22913	0.0153983	0.987714	NA
ENSG00000083312	TNPO1	6117.1	0.198148	0.465739	0.425449	0.670509	0.895509
ENSG00000083444	PLOD1	422.939	0.314586	0.69864	0.450284	0.652506	0.888654
ENSG00000083454	P2RX5	1716.12	0.221902	0.752834	0.294755	0.768181	0.931117
ENSG00000083457	ITGAE	1182.78	0.148704	0.332493	0.447238	0.654703	0.889105
ENSG00000083520	DIS3	3510.73	0.433462	0.556547	0.778842	0.436073	0.772999
ENSG00000083535	PIBF1	708.671	0.507605	0.710152	0.714783	0.474743	0.798885
ENSG00000083544	TDRD3	951.801	-0.346339	0.355625	-0.973888	0.330112	0.696083
ENSG00000083635	NUFIP1	690.789	1.0951	0.409118	2.67674	0.0074343	0.103632
ENSG00000083642	PDS5B	2195.82	0.0410903	0.51827	0.0792837	0.936807	0.984227
ENSG00000083720	OXCT1	2832.59	-0.131609	0.54916	-0.239654	0.810598	0.943064
ENSG00000083750	RRAGB	498.574	-0.311568	0.506228	-0.61547	0.538244	0.835658
ENSG00000083799	CYLD	19181.3	0.452363	0.242816	1.86299	0.0624642	0.340635
ENSG00000083807	SLC27A5	558.63	0.0598702	0.444721	0.134624	0.892909	0.969682
ENSG00000083812	ZNF324	1045.38	0.443251	0.338701	1.30868	0.190643	0.55979
ENSG00000083814	ZNF671	1314.73	-0.404544	0.338409	-1.19543	0.23192	0.607349
ENSG00000083817	ZNF416	407.845	0.387797	0.344074	1.12707	0.259711	0.63605
ENSG00000083828	ZNF586	1114.74	-0.118025	0.265648	-0.444291	0.656832	0.890391
ENSG00000083838	ZNF446	667.646	-0.88449	0.282333	-3.1328	0.0017315	0.0400319
ENSG00000083844	ZNF264	2429.04	0.227911	0.234966	0.969973	0.33206	0.697027
ENSG00000083845	RPS5	81304.1	0.170525	0.442244	0.385591	0.6998	0.905854
ENSG00000083857	FAT1	14.7692	-0.345485	0.737374	-0.468534	0.639403	0.882921
ENSG00000083896	YTHDC1	7993.17	-0.176046	0.402799	-0.437056	0.66207	0.893598
ENSG00000083937	CHMP2B	1829.09	0.520677	0.315955	1.64795	0.0993635	0.421126
ENSG00000084070	SMAP2	11910	0.110339	0.408837	0.269885	0.787249	0.936403
ENSG00000084072	PPIE	2924.38	-0.044106	0.280306	-0.15735	0.874969	0.964242
ENSG00000084073	ZMPSTE24	2232.86	0.936921	0.433743	2.16008	0.0307663	0.237636
ENSG00000084090	STARD7	8787.8	0.752832	0.451606	1.66701	0.0955122	0.414575
ENSG00000084092	NOA1	2567.92	-0.180731	0.151909	-1.18973	0.234152	0.609686
ENSG00000084093	REST	3268.25	-0.155737	0.441254	-0.352941	0.724133	0.915652
ENSG00000084110	HAL	48.6151	-0.385987	0.892477	-0.432489	0.665386	0.894767
ENSG00000084112	SSH1	2319.86	-0.346095	0.254718	-1.35874	0.174229	0.540192
ENSG00000084207	GSTP1	8915.17	0.400549	0.568761	0.704249	0.481278	0.802492
ENSG00000084234	APLP2	4101.17	-0.107533	0.252481	-0.425907	0.670176	0.89521
ENSG00000084444	FAM234B	392.549	0.0058806	0.26247	0.0224049	0.982125	0.996507
ENSG00000084453	SLCO1A2	9.77045	0.0425562	0.78893	0.0539417	0.956982	0.990307
ENSG00000084463	WBP11	6455.54	0.267112	0.384803	0.694153	0.487586	0.80615
ENSG00000084623	EIF3I	11480.2	1.02741	0.549567	1.86949	0.0615552	0.337895
ENSG00000084628	NKAIN1	1.35172	3.7598	3.28321	1.14516	0.252143	NA
ENSG00000084636	COL16A1	13.2589	-0.172911	0.822504	-0.210225	0.833492	0.950022
ENSG00000084652	TXLNA	5853.81	0.747984	0.424402	1.76244	0.0779948	0.377909
ENSG00000084674	APOB	2.20065	-0.156005	1.66545	-0.0936713	0.92537	NA
ENSG00000084676	NCOA1	2654.18	-0.109758	0.219562	-0.499897	0.617148	0.873961
ENSG00000084693	AGBL5	958.925	-0.361516	0.266116	-1.35849	0.174309	0.540192
ENSG00000084710	EFR3B	118.791	-0.10525	0.351139	-0.299738	0.764377	0.930392
ENSG00000084731	KIF3C	249.173	-1.72578	0.524821	-3.28831	0.00100789	0.0272213
ENSG00000084733	RAB10	5895.85	0.529639	0.374164	1.41553	0.156914	0.515475
ENSG00000084734	GCKR	16.7544	0.224818	0.459244	0.489539	0.62446	0.876771
ENSG00000084754	HADHA	10369.5	-0.200289	0.337267	-0.593859	0.552606	0.843256
ENSG00000084764	MAPRE3	212.125	-0.571227	0.289862	-1.97069	0.0487599	0.30171
ENSG00000084774	CAD	6255.66	0.507463	0.509558	0.995888	0.319305	0.687734
ENSG00000085063	CD59	3191.08	0.868857	0.410266	2.11779	0.0341928	0.251145
ENSG00000085117	CD82	5395.59	1.78853	0.537835	3.32542	0.000882847	0.0249108
ENSG00000085185	BCORL1	624.648	0.362836	0.397949	0.911764	0.361893	0.72147
ENSG00000085224	ATRX	4762.73	0.177232	0.574659	0.308412	0.757769	0.927681
ENSG00000085231	AK6	1277.68	1.14236	0.476327	2.39827	0.0164726	0.168248
ENSG00000085265	FCN1	77.569	-0.519391	0.763522	-0.680257	0.496342	0.810506
ENSG00000085274	MYNN	1268.79	0.15595	0.474954	0.328349	0.742648	0.921718
ENSG00000085276	MECOM	23.3502	0.89701	0.750381	1.1954	0.231929	0.607349
ENSG00000085365	SCAMP1	873.956	-0.502074	0.416709	-1.20485	0.228259	0.603617
ENSG00000085377	PREP	2470.99	0.326109	0.286113	1.13979	0.254374	0.631048
ENSG00000085382	HACE1	744.574	-0.456339	0.40549	-1.1254	0.260419	0.63605
ENSG00000085415	SEH1L	3712.36	1.31958	0.539063	2.4479	0.014369	0.154475
ENSG00000085433	WDR47	618.504	-0.468149	0.259026	-1.80734	0.0707093	0.359821
ENSG00000085449	WDFY1	2379.81	0.733877	0.346276	2.11934	0.0340616	0.250813
ENSG00000085465	OVGP1	378.053	-1.12213	0.861173	-1.30302	0.192566	0.562395
ENSG00000085491	SLC25A24	746.976	-0.686015	0.54413	-1.26076	0.207397	0.577656
ENSG00000085511	MAP3K4	2012.17	-0.636243	0.248338	-2.562	0.0104071	0.125568
ENSG00000085514	PILRA	175.01	-0.409915	0.642156	-0.638342	0.523251	0.826851
ENSG00000085552	IGSF9	4.31106	0.334888	0.886122	0.377925	0.705486	NA
ENSG00000085563	ABCB1	1132.76	-0.380836	0.391019	-0.973957	0.330078	0.696083
ENSG00000085644	ZNF213	1354.43	-0.132717	0.342455	-0.387545	0.698353	0.904974
ENSG00000085662	AKR1B1	5196.14	-0.346631	0.301073	-1.15132	0.249601	0.625746
ENSG00000085719	CPNE3	2918.31	-0.535982	0.298167	-1.79759	0.0722422	0.363203
ENSG00000085721	RRN3	3392.01	0.180766	0.314863	0.57411	0.565893	0.84915
ENSG00000085733	CTTN	356.134	2.65842	0.862791	3.08119	0.00206177	0.045175
ENSG00000085741	WNT11	19.6135	-2.24825	0.774867	-2.90146	0.00371424	0.0667154
ENSG00000085760	MTIF2	1762.4	-0.377121	0.438262	-0.860493	0.389517	0.739937
ENSG00000085788	DDHD2	2265.81	-0.360409	0.21014	-1.71509	0.0863288	0.396006
ENSG00000085831	TTC39A	26.986	0.734065	0.819511	0.895735	0.370394	0.727437
ENSG00000085832	EPS15	2925.25	-0.188317	0.46642	-0.40375	0.686396	0.901265
ENSG00000085840	ORC1	1115.77	-0.323715	0.966711	-0.334863	0.737729	0.920786
ENSG00000085871	MGST2	247.981	-0.426203	0.488421	-0.872614	0.382874	0.735883
ENSG00000085872	CHERP	5388.66	0.288857	0.251624	1.14797	0.250981	0.627452
ENSG00000085978	ATG16L1	2878.7	-0.191764	0.259846	-0.737989	0.460521	0.78976
ENSG00000085982	USP40	855.428	-0.260704	0.267973	-0.972876	0.330615	0.696083
ENSG00000085998	POMGNT1	2401.14	0.203336	0.424551	0.478944	0.631978	0.879907
ENSG00000085999	RAD54L	730.945	0.752936	0.942681	0.798718	0.424454	0.764381
ENSG00000086015	MAST2	989.458	0.0867559	0.65129	0.133206	0.89403	0.969858
ENSG00000086061	DNAJA1	10840.4	2.03609	0.587942	3.46307	0.000534041	0.0172325
ENSG00000086062	B4GALT1	3595.34	-0.292599	0.306785	-0.953758	0.340206	0.704439
ENSG00000086065	CHMP5	2647.84	0.613019	0.402062	1.52469	0.127337	0.470533
ENSG00000086102	NFX1	3859.43	0.155456	0.191949	0.80988	0.418009	0.760387
ENSG00000086159	AQP6	4.17617	0.363701	1.37146	0.265192	0.790861	NA
ENSG00000086189	DIMT1	4011.3	0.343776	0.272281	1.26258	0.206741	0.57707
ENSG00000086200	IPO11	1185.82	0.534357	0.44526	1.2001	0.2301	0.605866
ENSG00000086205	FOLH1	13.6494	0.30095	0.737832	0.407884	0.683359	0.899928
ENSG00000086232	EIF2AK1	5527.87	-0.224862	0.356109	-0.631442	0.527752	0.82914
ENSG00000086288	NME8	8.61343	0.903252	0.998524	0.904588	0.365684	0.723789
ENSG00000086289	EPDR1	101.997	-0.620751	0.503133	-1.23377	0.217288	0.590269
ENSG00000086300	SNX10	873.625	1.36016	0.561697	2.42153	0.0154554	0.161221
ENSG00000086475	SEPHS1	3081.13	-0.139037	0.379343	-0.36652	0.713977	0.911514
ENSG00000086504	MRPL28	3676.81	0.845589	0.604236	1.39944	0.161682	0.523281
ENSG00000086506	HBQ1	7.79463	0.524781	1.09057	0.481199	0.630375	NA
ENSG00000086544	ITPKC	833.964	0.863707	0.301513	2.86457	0.00417571	0.0719048
ENSG00000086548	CEACAM6	7.42734	-0.715953	0.926808	-0.772493	0.439822	NA
ENSG00000086570	FAT2	10.4182	0.0588782	0.871014	0.0675973	0.946106	0.986919
ENSG00000086589	RBM22	4458.09	0.351036	0.191635	1.83179	0.0669824	0.35086
ENSG00000086598	TMED2	7873.9	0.396643	0.250775	1.58167	0.113725	0.448282
ENSG00000086619	ERO1B	1105.08	-0.296366	0.689401	-0.42989	0.667276	0.894835
ENSG00000086666	ZFAND6	2457.24	0.0627827	0.300386	0.209007	0.834443	0.950119
ENSG00000086696	HSD17B2	93.5143	-0.116566	0.425382	-0.274027	0.784064	0.935638
ENSG00000086712	TXLNG	2369.41	0.621594	0.34346	1.8098	0.0703267	0.359044
ENSG00000086717	PPEF1	16.5077	-1.48694	0.901927	-1.64862	0.0992255	0.420987
ENSG00000086730	LAT2	863.942	0.287928	0.37631	0.765134	0.444191	0.778395
ENSG00000086758	HUWE1	14387	0.736788	0.466983	1.57776	0.11462	0.449674
ENSG00000086827	ZW10	977.836	0.229692	0.394902	0.581645	0.560806	0.84736
ENSG00000086848	ALG9	1135.82	0.265109	0.270895	0.978641	0.327758	0.694598
ENSG00000086967	MYBPC2	11.5332	1.1935	1.56249	0.763843	0.444961	0.778746
ENSG00000086991	NOX4	23.1684	-0.590406	0.523787	-1.12719	0.259663	0.63605
ENSG00000087008	ACOX3	713.075	0.119907	0.387785	0.309211	0.757161	0.927375
ENSG00000087053	MTMR2	1291.85	0.104682	0.540258	0.193763	0.846362	0.954254
ENSG00000087074	PPP1R15A	2386.58	1.40696	0.320197	4.39405	1.11259e-05	0.000889122
ENSG00000087076	HSD17B14	42.0709	0.342529	0.466454	0.734325	0.462751	0.791026
ENSG00000087077	TRIP6	1062.5	0.726712	0.553955	1.31186	0.189568	0.558766
ENSG00000087085	ACHE	38.8061	3.30849	0.79978	4.13674	3.52272e-05	0.00224597
ENSG00000087086	FTL	61210.7	-0.309299	0.36032	-0.858403	0.39067	0.740897
ENSG00000087087	SRRT	9400.96	0.475447	0.37881	1.25511	0.20944	0.580238
ENSG00000087088	BAX	5538.77	0.216557	0.351332	0.616389	0.537638	0.835331
ENSG00000087095	NLK	860.319	0.146122	0.28594	0.511023	0.609335	0.870239
ENSG00000087111	PIGS	2661.62	-0.536499	0.354455	-1.51359	0.13013	0.475161
ENSG00000087116	ADAMTS2	14.498	-0.305631	0.556885	-0.548822	0.583127	0.858558
ENSG00000087128	TMPRSS11E	1.91389	-1.73658	1.65845	-1.04711	0.295048	NA
ENSG00000087152	ATXN7L3	6139.69	0.0392585	0.357146	0.109923	0.912471	0.976317
ENSG00000087157	PGS1	2958.85	-0.0796317	0.21208	-0.37548	0.707303	0.909051
ENSG00000087191	PSMC5	7919.79	0.516616	0.474959	1.08771	0.276725	0.651479
ENSG00000087206	UIMC1	1768.61	0.130672	0.169227	0.772172	0.440012	0.776031
ENSG00000087237	CETP	367.32	2.03088	0.436923	4.64814	3.34934e-06	0.000329776
ENSG00000087245	MMP2	115.32	-0.59506	0.61049	-0.974725	0.329697	0.695915
ENSG00000087250	MT3	39.4498	-1.78004	1.10833	-1.60606	0.108262	0.438362
ENSG00000087253	LPCAT2	305.57	-0.0288855	0.416832	-0.0692978	0.944753	0.986375
ENSG00000087258	GNAO1	109.219	0.399534	0.576153	0.693452	0.488026	0.806412
ENSG00000087263	OGFOD1	3004.19	0.440972	0.406389	1.0851	0.277879	0.652317
ENSG00000087266	SH3BP2	3211.56	0.796534	0.584541	1.36267	0.172988	0.538223
ENSG00000087269	NOP14	7130.02	1.19502	0.474521	2.51836	0.0117902	0.136318
ENSG00000087274	ADD1	10287.4	-0.325604	0.251163	-1.29639	0.194842	0.565222
ENSG00000087299	L2HGDH	911.767	-0.615401	0.515886	-1.1929	0.232908	0.608681
ENSG00000087301	TXNDC16	321.751	-0.542141	0.45134	-1.20118	0.229681	0.605263
ENSG00000087302	RTRAF	5809.58	0.479868	0.227693	2.10752	0.0350722	0.253827
ENSG00000087303	NID2	45.8103	-0.122625	0.430425	-0.284893	0.775726	0.934187
ENSG00000087338	GMCL1	2239.31	-0.599964	0.424682	-1.41274	0.157733	0.516154
ENSG00000087365	SF3B2	15503.9	0.240331	0.334123	0.719288	0.471964	0.797413
ENSG00000087448	KLHL42	1590.04	-0.0911211	0.253307	-0.359726	0.719052	0.913396
ENSG00000087460	GNAS	44231	0.0793171	0.22324	0.3553	0.722365	0.91453
ENSG00000087470	DNM1L	2296.08	0.109404	0.477126	0.229297	0.818638	0.945379
ENSG00000087494	PTHLH	5.26671	1.989	1.1886	1.6734	0.0942492	NA
ENSG00000087495	PHACTR3	46.0934	0.143546	0.526822	0.272475	0.785257	0.935803
ENSG00000087502	ERGIC2	2603.82	0.891132	0.488335	1.82484	0.0680257	0.352882
ENSG00000087510	TFAP2C	2.33799	0.154615	1.25682	0.123021	0.902091	NA
ENSG00000087586	AURKA	917.531	-0.622014	0.920276	-0.675899	0.499105	0.812517
ENSG00000087589	CASS4	538.6	-0.146442	0.259206	-0.564965	0.572098	0.852876
ENSG00000087842	PIR	56.7257	-0.770239	0.636598	-1.20993	0.226306	0.602211
ENSG00000087884	AAMDC	189.085	-0.355148	0.277283	-1.28081	0.200259	0.569707
ENSG00000087903	RFX2	526.419	-0.174939	0.301013	-0.581169	0.561127	0.84736
ENSG00000087995	METTL2A	1417.56	1.04795	0.485848	2.15696	0.031009	0.238315
ENSG00000088002	SULT2B1	60.9579	-0.535133	0.577664	-0.926374	0.354252	0.716208
ENSG00000088035	ALG6	1126.88	-0.14032	0.353803	-0.396603	0.69166	0.902672
ENSG00000088038	CNOT3	3953.09	0.131732	0.331206	0.397735	0.690826	0.902144
ENSG00000088053	GP6	33.5991	0.324656	0.459046	0.70724	0.479417	0.801577
ENSG00000088179	PTPN4	1937.32	-0.426863	0.528762	-0.807288	0.4195	0.761379
ENSG00000088205	DDX18	8774.07	1.08234	0.382277	2.8313	0.00463591	0.0769422
ENSG00000088247	KHSRP	14284.1	0.379198	0.54412	0.696901	0.485865	0.805069
ENSG00000088256	GNA11	678.683	-0.170858	0.363422	-0.470135	0.638259	0.882514
ENSG00000088280	ASAP3	46.3569	0.842522	0.54002	1.56017	0.118721	0.457984
ENSG00000088298	EDEM2	1567.42	-0.0345019	0.191431	-0.180231	0.856971	0.958649
ENSG00000088305	DNMT3B	178.305	0.0512427	0.512589	0.0999683	0.920369	0.979068
ENSG00000088320	REM1	0.804267	2.25422	4.7397	0.475603	0.634357	NA
ENSG00000088325	TPX2	2473.2	-0.00754587	0.961534	-0.00784774	0.993738	0.998712
ENSG00000088340	FER1L4	35.9571	-0.492569	0.538411	-0.914857	0.360267	0.720982
ENSG00000088356	PDRG1	1445.21	0.354965	0.265334	1.3378	0.18096	0.548424
ENSG00000088367	EPB41L1	30.0318	-1.05708	0.961577	-1.09931	0.271631	0.646152
ENSG00000088386	SLC15A1	24.7284	0.240415	0.603502	0.398366	0.690361	0.902124
ENSG00000088387	DOCK9	4495.43	-0.57265	0.386458	-1.48179	0.138396	0.487538
ENSG00000088448	ANKRD10	4126.73	-0.444598	0.395076	-1.12535	0.260442	0.63605
ENSG00000088451	TGDS	1149.13	0.0109173	0.491916	0.0221933	0.982294	0.996507
ENSG00000088538	DOCK3	206.759	-0.335612	0.35755	-0.938644	0.347914	0.710783
ENSG00000088543	C3orf18	932.313	-0.542262	0.264407	-2.05086	0.0402804	0.27221
ENSG00000088682	COQ9	1540.27	-0.320262	0.353088	-0.907032	0.36439	0.722878
ENSG00000088726	TMEM40	15.4656	-0.37931	0.576099	-0.658411	0.510274	0.818761
ENSG00000088727	KIF9	130.019	1.02792	0.386157	2.66192	0.00776963	0.107258
ENSG00000088756	ARHGAP28	60.6846	-0.0704976	0.445515	-0.158238	0.874269	0.964242
ENSG00000088766	CRLS1	2315.55	0.691124	0.31303	2.20785	0.0272546	0.222953
ENSG00000088808	PPP1R13B	1110.28	-0.509191	0.235972	-2.15785	0.0309396	0.238259
ENSG00000088812	ATRN	1150.78	-0.341673	0.339913	-1.00518	0.314812	0.683362
ENSG00000088826	SMOX	266.632	0.109601	0.544801	0.201177	0.84056	0.952344
ENSG00000088827	SIGLEC1	4.18774	-0.735463	1.37752	-0.533905	0.593407	NA
ENSG00000088832	FKBP1A	9626.65	0.672314	0.52926	1.27029	0.203981	0.573808
ENSG00000088833	NSFL1C	4211.17	0.482125	0.4726	1.02015	0.307655	0.67775
ENSG00000088836	SLC4A11	36.3315	-1.2443	0.787964	-1.57913	0.114307	0.4495
ENSG00000088854	C20orf194	254.469	-0.835894	0.310417	-2.69281	0.0070852	0.100953
ENSG00000088876	ZNF343	632.645	0.11048	0.180878	0.610797	0.541334	0.836947
ENSG00000088881	EBF4	242.457	0.134065	0.421451	0.318102	0.750407	0.924488
ENSG00000088882	CPXM1	189.943	0.0830084	0.605068	0.137189	0.890882	0.969287
ENSG00000088888	MAVS	6432.61	-0.50575	0.24039	-2.10387	0.0353899	0.254648
ENSG00000088899	LZTS3	1539.79	-0.78036	0.730592	-1.06812	0.285466	0.659016
ENSG00000088926	F11	1.25506	-2.1487	2.20654	-0.973786	0.330163	NA
ENSG00000088930	XRN2	5377.13	0.580621	0.3437	1.68933	0.091157	0.406411
ENSG00000088970	KIZ	1030.29	-0.619794	0.586327	-1.05708	0.290475	0.66252
ENSG00000088986	DYNLL1	4395.2	0.457826	0.498802	0.917851	0.358697	0.719336
ENSG00000088992	TESC	396.935	0.82823	0.642902	1.28827	0.197653	0.567994
ENSG00000089006	SNX5	5474.22	0.512528	0.397362	1.28983	0.197111	0.567919
ENSG00000089009	RPL6	83440.9	-0.0708748	0.245837	-0.288299	0.773118	0.932722
ENSG00000089012	SIRPG	1929.95	0.31681	0.386456	0.819782	0.41234	0.755434
ENSG00000089022	MAPKAPK5	3578.36	0.536015	0.283473	1.89088	0.0586398	0.330016
ENSG00000089041	P2RX7	894.928	2.4401	0.28765	8.48288	2.19689e-17	3.66175e-14
ENSG00000089048	ESF1	1727.41	1.5284	0.586782	2.60471	0.00919511	0.1177
ENSG00000089050	RBBP9	753.457	-0.450421	0.374705	-1.20207	0.229337	0.604714
ENSG00000089053	ANAPC5	8468.34	-0.0549576	0.235298	-0.233566	0.815322	0.944899
ENSG00000089057	SLC23A2	2289.69	-0.106788	0.232513	-0.459276	0.646036	0.885368
ENSG00000089060	SLC8B1	4529.25	-0.987979	0.339559	-2.9096	0.00361896	0.0657187
ENSG00000089063	TMEM230	4989.63	-0.0257045	0.104169	-0.246757	0.805096	0.94146
ENSG00000089091	DZANK1	176.198	-0.421027	0.413225	-1.01888	0.30826	0.67846
ENSG00000089094	KDM2B	3847.26	-0.488744	0.248632	-1.96573	0.0493299	0.303948
ENSG00000089123	TASP1	519.137	0.200566	0.25568	0.784439	0.432782	0.770082
ENSG00000089127	OAS1	846.386	1.60482	0.550345	2.91603	0.00354522	0.0648845
ENSG00000089154	GCN1	10105.1	0.341936	0.394352	0.867083	0.385896	0.737448
ENSG00000089157	RPLP0	157356	0.197323	0.453016	0.435577	0.663144	0.894322
ENSG00000089159	PXN	7368.01	-0.47043	0.264998	-1.77522	0.0758612	0.371817
ENSG00000089163	SIRT4	138.467	-0.684193	0.408138	-1.67637	0.0936649	0.409964
ENSG00000089169	RPH3A	39.0666	-0.250269	0.483599	-0.517512	0.604799	0.868626
ENSG00000089177	KIF16B	472.87	-0.294955	0.39146	-0.753474	0.451165	0.783912
ENSG00000089195	TRMT6	1988.1	1.16898	0.405862	2.88024	0.00397371	0.0698241
ENSG00000089199	CHGB	9.75291	0.739945	0.674601	1.09686	0.272701	0.647419
ENSG00000089220	PEBP1	9623.27	-0.217364	0.307917	-0.705919	0.480238	0.80176
ENSG00000089234	BRAP	1603.64	-0.0145689	0.210345	-0.0692618	0.944781	0.986375
ENSG00000089248	ERP29	11327.3	-0.382746	0.29941	-1.27833	0.201133	0.570495
ENSG00000089250	NOS1	65.5948	0.0335902	0.557398	0.0602624	0.951947	0.989367
ENSG00000089280	FUS	35011.3	0.94416	0.500149	1.88776	0.0590583	0.330618
ENSG00000089289	IGBP1	4173.47	-0.418195	0.30894	-1.35364	0.17585	0.541601
ENSG00000089327	FXYD5	22272.3	-0.206549	0.344184	-0.600111	0.548432	0.840978
ENSG00000089335	ZNF302	2486.19	-0.0683284	0.345201	-0.197938	0.843093	0.953062
ENSG00000089351	GRAMD1A	7913.43	-1.10404	0.302142	-3.65405	0.000258134	0.0102616
ENSG00000089356	FXYD3	14.223	-0.259162	0.691917	-0.374557	0.70799	0.90928
ENSG00000089472	HEPH	1.70865	-1.65447	2.06288	-0.802019	0.422542	NA
ENSG00000089486	CDIP1	3498.54	-0.111016	0.387587	-0.286429	0.774549	0.933956
ENSG00000089505	CMTM1	75.1207	-0.632014	0.559528	-1.12955	0.258666	0.635098
ENSG00000089558	KCNH4	64.5663	1.93973	0.882514	2.19796	0.0279523	0.225991
ENSG00000089597	GANAB	14662.7	-0.610092	0.294283	-2.07315	0.0381582	0.265107
ENSG00000089639	GMIP	7757.59	-0.52914	0.388215	-1.36301	0.172881	0.538177
ENSG00000089682	RBM41	354.943	-0.248177	0.506487	-0.489997	0.624136	0.876729
ENSG00000089685	BIRC5	2134.98	0.472367	0.97559	0.484186	0.628254	0.877749
ENSG00000089692	LAG3	2298.72	3.02304	1.16133	2.60309	0.00923881	0.117935
ENSG00000089693	MLF2	6292.36	0.415375	0.374669	1.10865	0.267583	0.641977
ENSG00000089723	OTUB2	44.8217	0.72129	0.660316	1.09234	0.274683	0.649733
ENSG00000089737	DDX24	13730.2	0.474753	0.271931	1.74586	0.0808351	0.385428
ENSG00000089775	ZBTB25	4397.17	-0.315336	0.529496	-0.595539	0.551483	0.842534
ENSG00000089818	NECAP1	2872.07	0.286816	0.206909	1.3862	0.165687	0.529704
ENSG00000089820	ARHGAP4	14707.8	-0.439048	0.294982	-1.48839	0.136648	0.485546
ENSG00000089847	ANKRD24	243.639	-0.400901	0.470417	-0.852224	0.39409	0.743873
ENSG00000089876	DHX32	816.901	-0.212013	0.462127	-0.458776	0.646395	0.885446
ENSG00000089902	RCOR1	1824.24	0.409421	0.289237	1.41552	0.156915	0.515475
ENSG00000089916	GPATCH2L	2521.33	0.622545	0.353929	1.75895	0.0785855	0.380056
ENSG00000090006	LTBP4	5234.88	0.769724	0.406805	1.89212	0.0584748	0.329359
ENSG00000090013	BLVRB	798.46	-0.365666	0.437919	-0.835008	0.403713	0.75023
ENSG00000090020	SLC9A1	1355.29	-0.211981	0.418703	-0.506279	0.612661	0.871529
ENSG00000090054	SPTLC1	2652.21	0.356273	0.232648	1.53138	0.125675	0.468609
ENSG00000090060	PAPOLA	9656.4	0.244859	0.280397	0.873259	0.382522	0.735826
ENSG00000090061	CCNK	3880.24	0.315649	0.36253	0.870682	0.383928	0.736331
ENSG00000090097	PCBP4	824.346	-1.14285	0.383339	-2.98129	0.00287034	0.0565038
ENSG00000090104	RGS1	3282.27	4.25839	0.545016	7.81333	5.56987e-15	5.41553e-12
ENSG00000090238	YPEL3	7260.02	-1.27924	0.594883	-2.1504	0.0315237	0.240583
ENSG00000090263	MRPS33	2185.31	0.45936	0.318241	1.44343	0.148898	0.504506
ENSG00000090266	NDUFB2	3992.08	0.763095	0.4319	1.76683	0.077256	0.375577
ENSG00000090273	NUDC	8597.44	0.772486	0.566432	1.36378	0.172638	0.537782
ENSG00000090316	MAEA	4707.84	-0.136439	0.193102	-0.706562	0.479839	0.801758
ENSG00000090339	ICAM1	2629.48	4.87587	0.722039	6.75292	1.449e-11	6.50238e-09
ENSG00000090372	STRN4	3784.43	0.441862	0.256776	1.72081	0.0852859	0.394325
ENSG00000090376	IRAK3	105.277	-0.387287	0.448368	-0.863771	0.387714	0.738769
ENSG00000090382	LYZ	1354.06	-0.11097	0.735964	-0.150782	0.880147	0.966187
ENSG00000090432	MUL1	1775.21	0.302927	0.357453	0.84746	0.396739	0.745771
ENSG00000090447	TFAP4	2204.01	-0.186978	0.223149	-0.837908	0.402082	0.748751
ENSG00000090470	PDCD7	3006.89	0.0792996	0.255058	0.310908	0.755871	0.926989
ENSG00000090487	SPG21	3141.01	0.445004	0.259903	1.71219	0.086861	0.396941
ENSG00000090520	DNAJB11	3819.07	1.56488	0.41021	3.81482	0.00013628	0.00617493
ENSG00000090530	P3H2	10.6476	-0.591165	1.02346	-0.577616	0.563523	0.848375
ENSG00000090539	CHRD	4.52727	-0.0151136	1.31315	-0.0115094	0.990817	NA
ENSG00000090554	FLT3LG	7253.65	-0.254666	0.36623	-0.695373	0.486821	0.805657
ENSG00000090565	RAB11FIP3	2302.77	-0.135222	0.252122	-0.536333	0.591728	0.864241
ENSG00000090581	GNPTG	3558.91	-0.0437307	0.277644	-0.157506	0.874846	0.964242
ENSG00000090612	ZNF268	1113.98	0.324207	0.302839	1.07056	0.284369	0.658292
ENSG00000090615	GOLGA3	6392.05	-0.139642	0.238375	-0.585807	0.558006	0.846257
ENSG00000090621	PABPC4	17594.3	0.212071	0.303815	0.698028	0.48516	0.804603
ENSG00000090659	CD209	16.6212	-0.00266558	0.535418	-0.0049785	0.996028	0.999272
ENSG00000090661	CERS4	1130.48	-0.539216	0.327958	-1.64416	0.100142	0.422244
ENSG00000090674	MCOLN1	817.928	0.263451	0.328569	0.801815	0.42266	0.76376
ENSG00000090686	USP48	3453.97	-0.283044	0.418729	-0.67596	0.499066	0.812517
ENSG00000090776	EFNB1	596.537	0.227126	0.303788	0.747644	0.454675	0.786091
ENSG00000090857	PDPR	4540.17	-0.182328	0.23652	-0.770877	0.44078	0.776317
ENSG00000090861	AARS	13312	1.30875	0.361909	3.61625	0.000298899	0.0113221
ENSG00000090863	GLG1	9395.67	-0.636194	0.282138	-2.2549	0.0241393	0.209324
ENSG00000090889	KIF4A	567.157	0.241535	0.971792	0.248546	0.803712	0.941191
ENSG00000090905	TNRC6A	4871.42	-0.0865229	0.278414	-0.310771	0.755975	0.926993
ENSG00000090924	PLEKHG2	1581.88	1.44155	0.764702	1.88511	0.0594146	0.331526
ENSG00000090932	DLL3	35.8308	0.442227	0.835008	0.529608	0.596384	0.865908
ENSG00000090971	NAT14	309.092	-0.226903	0.419655	-0.540689	0.588722	0.862761
ENSG00000090975	PITPNM2	2548.75	-0.352152	0.362211	-0.972227	0.330937	0.696083
ENSG00000090989	EXOC1	1824.37	-0.375642	0.466028	-0.80605	0.420214	0.761997
ENSG00000091009	RBM27	2629.35	0.224875	0.321173	0.70017	0.483821	0.803993
ENSG00000091010	POU4F3	3.03593	4.48334	1.70353	2.63179	0.00849372	NA
ENSG00000091039	OSBPL8	4483.08	-0.498991	0.484787	-1.0293	0.303339	0.674046
ENSG00000091073	DTX2	1235.54	-0.0757581	0.268036	-0.282642	0.777451	0.934861
ENSG00000091106	NLRC4	39.2353	-0.943711	0.42975	-2.19595	0.0280954	0.226618
ENSG00000091127	PUS7	973.605	1.89637	0.610246	3.10755	0.00188647	0.0424093
ENSG00000091128	LAMB4	2.72115	-0.169644	1.70837	-0.0993021	0.920898	NA
ENSG00000091129	NRCAM	317.479	-1.34783	0.787644	-1.71121	0.0870417	0.397013
ENSG00000091136	LAMB1	30.7244	0.497884	0.673961	0.738743	0.460063	0.789538
ENSG00000091137	SLC26A4	31.3497	-0.325409	0.817556	-0.398027	0.69061	0.902124
ENSG00000091138	SLC26A3	4.5227	-3.28965	1.07176	-3.06938	0.00214504	NA
ENSG00000091140	DLD	3145.12	0.445879	0.465943	0.956939	0.338598	0.703328
ENSG00000091157	WDR7	1372.76	0.0293451	0.251546	0.116659	0.90713	0.974491
ENSG00000091164	TXNL1	3776.62	0.539373	0.204754	2.63425	0.00843237	0.112464
ENSG00000091181	IL5RA	52.5629	-1.77094	0.723695	-2.44709	0.0144017	0.154475
ENSG00000091262	ABCC6	125.373	0.617387	0.333358	1.85202	0.0640223	0.344261
ENSG00000091317	CMTM6	6044	0.161851	0.448643	0.360756	0.718282	0.913312
ENSG00000091409	ITGA6	4611.6	-0.526063	0.586431	-0.897059	0.369687	0.726851
ENSG00000091428	RAPGEF4	33.6682	-0.880334	0.825502	-1.06642	0.286233	0.659749
ENSG00000091436	MAP3K20	440.908	0.761352	0.610709	1.24667	0.212519	0.584045
ENSG00000091483	FH	2802.66	0.242388	0.513148	0.472355	0.636674	0.881684
ENSG00000091490	SEL1L3	2936.57	0.0620511	0.340747	0.182103	0.855502	0.958153
ENSG00000091513	TF	478.363	0.0534893	0.347169	0.154073	0.877553	0.964661
ENSG00000091527	CDV3	13653.2	0.586484	0.273201	2.14672	0.0318159	0.241753
ENSG00000091536	MYO15A	78.5891	0.540093	0.391587	1.37924	0.16782	0.532231
ENSG00000091542	ALKBH5	6102.44	-0.0706986	0.144062	-0.49075	0.623603	0.876538
ENSG00000091583	APOH	10.5639	-0.50537	0.64353	-0.785309	0.432272	0.769951
ENSG00000091592	NLRP1	14608.1	-0.985714	0.661142	-1.49093	0.135981	0.485112
ENSG00000091622	PITPNM3	42.128	-1.08319	0.564885	-1.91754	0.0551692	0.321281
ENSG00000091640	SPAG7	2518.26	0.221784	0.289891	0.76506	0.444236	0.778395
ENSG00000091651	ORC6	1264.73	0.176805	0.538114	0.328563	0.742486	0.921718
ENSG00000091656	ZFHX4	8.96408	0.0811002	0.92657	0.0875273	0.930252	0.98219
ENSG00000091732	ZC3HC1	1082.55	0.274653	0.364405	0.753702	0.451028	0.783849
ENSG00000091831	ESR1	193.391	-1.18679	0.761987	-1.55749	0.119354	0.458532
ENSG00000091844	RGS17	102.866	-0.381635	0.636525	-0.59956	0.5488	0.840978
ENSG00000091879	ANGPT2	45.9983	0.0352601	0.434845	0.0810866	0.935373	0.984227
ENSG00000091947	TMEM101	1724.96	-0.590133	0.291967	-2.02124	0.0432554	0.282577
ENSG00000091972	CD200	1824.06	3.87439	0.865291	4.47756	7.55012e-06	0.000654952
ENSG00000091986	CCDC80	119.97	0.449695	0.347023	1.29587	0.195022	0.56549
ENSG00000092009	CMA1	2.05557	-2.91968	1.96297	-1.48738	0.136916	NA
ENSG00000092010	PSME1	16817	1.15517	0.496443	2.32689	0.0199709	0.189055
ENSG00000092020	PPP2R3C	1596.17	0.288819	0.312004	0.925688	0.354608	0.716298
ENSG00000092036	HAUS4	1927.66	-0.790433	0.387347	-2.04064	0.0412871	0.276098
ENSG00000092051	JPH4	12.8993	1.21237	0.859166	1.4111	0.158216	0.516792
ENSG00000092054	MYH7	3.93288	2.50997	2.6236	0.95669	0.338724	NA
ENSG00000092067	CEBPE	83.3352	-2.0325	0.741387	-2.74149	0.00611615	0.0923659
ENSG00000092068	SLC7A8	459.738	-1.65537	0.509073	-3.25174	0.00114701	0.0300735
ENSG00000092094	OSGEP	3137.5	0.12741	0.272341	0.467832	0.639905	0.883109
ENSG00000092096	SLC22A17	1136.82	-1.06439	0.436352	-2.4393	0.0147159	0.156231
ENSG00000092098	RNF31	4277.49	0.491022	0.343977	1.42748	0.15344	0.510338
ENSG00000092108	SCFD1	1701.84	0.361223	0.493186	0.732428	0.463907	0.791957
ENSG00000092140	G2E3	1259.86	0.0471113	0.565854	0.083257	0.933647	0.983516
ENSG00000092148	HECTD1	3764.41	-0.20315	0.344824	-0.589139	0.555768	0.845041
ENSG00000092199	HNRNPC	42376.2	0.439469	0.293946	1.49507	0.134897	0.483286
ENSG00000092200	RPGRIP1	22.6681	-0.414637	0.479355	-0.864989	0.387045	0.738385
ENSG00000092201	SUPT16H	9011.09	0.154543	0.450924	0.342725	0.731805	0.91757
ENSG00000092203	TOX4	4342.09	0.442777	0.438887	1.00886	0.313041	0.682109
ENSG00000092208	GEMIN2	615.924	0.0319199	0.241191	0.132343	0.894713	0.969858
ENSG00000092295	TGM1	150.587	-0.368913	0.649458	-0.568033	0.570013	0.851716
ENSG00000092330	TINF2	4293.84	0.751912	0.352973	2.13022	0.0331531	0.246692
ENSG00000092345	DAZL	12.2553	-1.30663	1.10839	-1.17885	0.238457	0.614442
ENSG00000092421	SEMA6A	217.013	0.235877	0.603579	0.390797	0.695947	0.904277
ENSG00000092439	TRPM7	3733.81	0.572738	0.465265	1.23099	0.218325	0.591985
ENSG00000092445	TYRO3	180.065	0.467293	0.49944	0.935633	0.349462	0.712175
ENSG00000092470	WDR76	1767.07	-0.30352	0.615194	-0.493372	0.62175	0.875696
ENSG00000092529	CAPN3	423.981	-0.540265	0.78298	-0.690012	0.490187	0.808314
ENSG00000092531	SNAP23	3057.53	-0.779774	0.273842	-2.84753	0.00440604	0.0742802
ENSG00000092607	TBX15	2.0759	0.187205	2.02664	0.0923718	0.926403	NA
ENSG00000092621	PHGDH	4420.9	1.90967	0.736321	2.59353	0.00949955	0.120017
ENSG00000092758	COL9A3	26.2998	0.32185	0.909738	0.353783	0.723502	0.915351
ENSG00000092820	EZR	13824.1	0.344115	0.450912	0.763154	0.445372	0.778914
ENSG00000092841	MYL6	26400.2	0.538362	0.526493	1.02254	0.306524	0.677151
ENSG00000092847	AGO1	2715.99	-0.405981	0.319662	-1.27003	0.204074	0.573808
ENSG00000092850	TEKT2	4.63148	-0.811166	1.22196	-0.663823	0.506803	NA
ENSG00000092853	CLSPN	1325.85	0.445077	0.990758	0.449228	0.653267	0.888763
ENSG00000092871	RFFL	3736.67	-0.697204	0.289752	-2.40621	0.0161192	0.16592
ENSG00000092929	UNC13D	7152.48	-1.05643	0.32773	-3.22348	0.00126641	0.0324031
ENSG00000092931	MFSD11	1301.97	0.259084	0.205125	1.26305	0.20657	0.576926
ENSG00000092964	DPYSL2	693.971	-0.89545	0.343021	-2.61048	0.00904153	0.116884
ENSG00000092969	TGFB2	3.73226	-0.0701587	1.59185	-0.0440737	0.964846	NA
ENSG00000092978	GPATCH2	532.098	0.0995991	0.403129	0.247065	0.804858	0.941401
ENSG00000093000	NUP50	7577.49	-0.0276764	0.378493	-0.0731227	0.941709	0.985607
ENSG00000093009	CDC45	1486.82	0.557229	0.941529	0.591834	0.553962	0.84383
ENSG00000093010	COMT	2785.5	-0.0114669	0.371441	-0.0308714	0.975372	0.994947
ENSG00000093072	ADA2	3818.22	-0.941634	0.680186	-1.38438	0.166243	0.530537
ENSG00000093100	AC016026.1	396.135	0.765443	0.421093	1.81775	0.0691022	0.355699
ENSG00000093134	VNN3	79.8718	-0.0528032	0.553187	-0.0954528	0.923955	0.980022
ENSG00000093144	ECHDC1	3022.51	0.638618	0.455931	1.40069	0.161307	0.52248
ENSG00000093167	LRRFIP2	1364.99	-0.178373	0.152351	-1.1708	0.241679	0.616637
ENSG00000093183	SEC22C	2405.83	-0.402753	0.184037	-2.18844	0.0286376	0.228682
ENSG00000093217	XYLB	131.603	-0.200669	0.766551	-0.261781	0.79349	0.938615
ENSG00000094631	HDAC6	2433.37	-0.0219788	0.238116	-0.0923031	0.926457	0.980891
ENSG00000094661	OR1I1	106.158	0.204426	0.294554	0.694017	0.487672	0.806165
ENSG00000094755	GABRP	23.4672	0.27046	0.532146	0.508244	0.611282	0.871047
ENSG00000094804	CDC6	1686.56	0.633349	0.892443	0.70968	0.477903	0.801039
ENSG00000094841	UPRT	865.137	0.128657	0.335845	0.383084	0.701657	0.906649
ENSG00000094880	CDC23	1891	0.035381	0.311223	0.113684	0.909488	0.975529
ENSG00000094914	AAAS	2759.47	-0.0518533	0.410662	-0.126267	0.89952	0.97164
ENSG00000094916	CBX5	6668.02	-0.280007	0.268015	-1.04474	0.296141	0.667808
ENSG00000094975	SUCO	2229.55	-0.125005	0.546811	-0.228607	0.819175	0.945521
ENSG00000095002	MSH2	2432.78	-0.274244	0.579034	-0.473623	0.635769	0.881283
ENSG00000095015	MAP3K1	4743.78	-0.612525	0.509498	-1.20221	0.229282	0.604714
ENSG00000095059	DHPS	4946.7	0.126339	0.280963	0.449665	0.652952	0.888763
ENSG00000095066	HOOK2	951.28	-0.195652	0.235951	-0.829208	0.406987	0.752106
ENSG00000095139	ARCN1	7444.16	0.630311	0.189528	3.32568	0.000882025	0.0249108
ENSG00000095203	EPB41L4B	5.03046	1.52458	1.3975	1.09093	0.275304	NA
ENSG00000095209	TMEM38B	913.316	0.0331964	0.278386	0.119246	0.905081	0.97371
ENSG00000095261	PSMD5	2309.95	-0.0484523	0.296924	-0.163181	0.870376	0.962774
ENSG00000095303	PTGS1	206.803	-0.0933113	0.411115	-0.226971	0.820446	0.945852
ENSG00000095319	NUP188	6543.51	0.554229	0.502928	1.10201	0.270459	0.64505
ENSG00000095321	CRAT	1062.02	-0.913426	0.437582	-2.08744	0.0368485	0.259485
ENSG00000095370	SH2D3C	2548.6	-1.32562	0.377621	-3.51044	0.000447359	0.0152174
ENSG00000095380	NANS	2540.8	0.888012	0.389693	2.27875	0.0226822	0.202173
ENSG00000095383	TBC1D2	468.659	-0.835648	0.332674	-2.51191	0.0120079	0.137896
ENSG00000095397	WHRN	147.405	0.747532	0.407147	1.83602	0.0663541	0.349915
ENSG00000095464	PDE6C	43.4048	-0.0180413	0.819602	-0.0220123	0.982438	0.996507
ENSG00000095485	CWF19L1	2876.68	0.224489	0.163782	1.37065	0.170483	0.535139
ENSG00000095539	SEMA4G	209.061	-0.990224	0.508806	-1.94617	0.0516341	0.310777
ENSG00000095564	BTAF1	3339.34	-0.0580015	0.494356	-0.117327	0.906601	0.974191
ENSG00000095574	IKZF5	2192.17	-0.297722	0.314545	-0.946516	0.343886	0.706513
ENSG00000095585	BLNK	42.5905	0.356234	0.423534	0.841099	0.400292	0.746973
ENSG00000095587	TLL2	15.2975	0.581299	0.74022	0.785305	0.432275	0.769951
ENSG00000095627	TDRD1	17.0138	-0.741357	0.676949	-1.09514	0.273453	0.64815
ENSG00000095637	SORBS1	55.9022	-0.0909703	0.700315	-0.129899	0.896646	0.970614
ENSG00000095713	CRTAC1	2.62503	-1.02173	1.67182	-0.611146	0.541103	NA
ENSG00000095739	BAMBI	12.3734	0.213991	0.6557	0.326355	0.744156	0.922192
ENSG00000095752	IL11	11.3999	0.521656	0.822348	0.63435	0.525852	0.828056
ENSG00000095787	WAC	8018.31	-0.0319379	0.265033	-0.120505	0.904083	0.973333
ENSG00000095794	CREM	3862.29	3.46544	0.617335	5.61355	1.98215e-08	4.20486e-06
ENSG00000095906	NUBP2	5137.58	-0.0376248	0.406403	-0.09258	0.926237	0.980878
ENSG00000095917	TPSD1	13.6558	-0.866787	0.955246	-0.907396	0.364197	0.722677
ENSG00000095932	SMIM24	112.755	-0.578146	0.589915	-0.980051	0.327061	0.693815
ENSG00000095951	HIVEP1	1730.94	1.49183	0.44246	3.37168	0.00074711	0.0220681
ENSG00000095970	TREM2	7.00143	-1.52234	1.27411	-1.19483	0.232155	NA
ENSG00000096060	FKBP5	8105.63	0.39364	0.479828	0.820377	0.412001	0.755139
ENSG00000096063	SRPK1	3531.17	0.451976	0.497845	0.907865	0.36395	0.722603
ENSG00000096070	BRPF3	2040.4	-0.128493	0.182367	-0.704589	0.481066	0.80235
ENSG00000096080	MRPS18A	1809.64	0.745299	0.509822	1.46188	0.143774	0.49664
ENSG00000096088	PGC	2.17891	-0.212742	1.79664	-0.118411	0.905742	NA
ENSG00000096092	TMEM14A	596.346	-0.953821	0.395378	-2.41243	0.0158468	0.164203
ENSG00000096093	EFHC1	441.75	0.130639	0.620521	0.210531	0.833253	0.950022
ENSG00000096264	NCR2	7.00957	2.84889	1.55064	1.83724	0.066175	NA
ENSG00000096384	HSP90AB1	86263.4	1.5997	0.622094	2.57148	0.0101264	0.123868
ENSG00000096401	CDC5L	2655.6	0.307699	0.354773	0.867313	0.385771	0.737442
ENSG00000096433	ITPR3	4689.67	-0.313889	0.324542	-0.967178	0.333455	0.697938
ENSG00000096654	ZNF184	572.684	-0.2827	0.446409	-0.633277	0.526553	0.828388
ENSG00000096696	DSP	12.3133	2.26779	1.05708	2.14534	0.0319258	0.242273
ENSG00000096717	SIRT1	2627.89	-0.164153	0.400564	-0.409806	0.681948	0.8994
ENSG00000096746	HNRNPH3	10595.6	0.469979	0.312966	1.50169	0.133177	0.4801
ENSG00000096872	IFT74	288.047	-0.109753	0.372684	-0.294492	0.768382	0.931117
ENSG00000096968	JAK2	1089.3	0.473602	0.521405	0.908319	0.36371	0.722558
ENSG00000096996	IL12RB1	2374.62	1.33422	0.525357	2.53965	0.0110964	0.130692
ENSG00000097007	ABL1	2533.79	-0.17694	0.393107	-0.450107	0.652634	0.888726
ENSG00000097021	ACOT7	3769.95	2.31372	0.911392	2.53866	0.0111277	0.130945
ENSG00000097033	SH3GLB1	3937.26	0.515768	0.312209	1.65199	0.0985357	0.419642
ENSG00000097046	CDC7	711.776	-0.347418	0.476154	-0.729634	0.465614	0.792979
ENSG00000097096	SYDE2	131.786	0.1958	0.413169	0.473897	0.635573	0.881282
ENSG00000099139	PCSK5	1109.39	-0.336927	0.535658	-0.628996	0.529351	0.829522
ENSG00000099194	SCD	2335.77	1.86532	0.806885	2.31175	0.0207915	0.19286
ENSG00000099203	TMED1	941.295	0.65339	0.50958	1.28221	0.199768	0.569394
ENSG00000099204	ABLIM1	17163.9	-0.893315	0.424027	-2.10674	0.03514	0.253827
ENSG00000099219	ERMP1	1071.48	-1.15491	0.37194	-3.10508	0.00190227	0.0426411
ENSG00000099246	RAB18	2491	0.230756	0.366358	0.629864	0.528784	0.829511
ENSG00000099250	NRP1	102.377	-0.0644555	0.388082	-0.166087	0.868088	0.961871
ENSG00000099251	HSD17B7P2	349.167	-0.314291	0.605246	-0.519278	0.603567	0.868121
ENSG00000099256	PRTFDC1	48.6925	-1.6192	0.456057	-3.55044	0.000384581	0.0135998
ENSG00000099260	PALMD	17.8334	0.353459	0.711548	0.496747	0.619368	0.874717
ENSG00000099282	TSPAN15	127.962	-1.01655	0.383349	-2.65178	0.00800697	0.10923
ENSG00000099284	H2AFY2	503.221	-1.00956	0.471865	-2.1395	0.0323948	0.243933
ENSG00000099290	WASHC2A	2956.36	-0.297203	0.183274	-1.62163	0.104882	0.431668
ENSG00000099308	MAST3	3505.01	0.00666212	0.312184	0.0213404	0.982974	0.996507
ENSG00000099326	MZF1	1680.13	-0.450202	0.27603	-1.63099	0.102893	0.427912
ENSG00000099330	OCEL1	747.362	-0.810667	0.426226	-1.90197	0.0571754	0.325878
ENSG00000099331	MYO9B	8247.86	-0.477349	0.256914	-1.85801	0.0631669	0.342719
ENSG00000099337	KCNK6	2276.35	0.212318	0.256171	0.828812	0.407211	0.752106
ENSG00000099338	CATSPERG	191.795	0.0372525	0.328064	0.113553	0.909592	0.975529
[truncated: 30,907 more rows]

## Sheet: 8hr CD3CD28
8hr CD3CD28 DE
id	gene_name	baseMean	log2FoldChange	lfcSE	stat	pvalue	padj
ENSG00000000003	TSPAN6	120.126	-0.532464	0.492543	-1.08105	0.279674	0.582865
ENSG00000000419	DPM1	2457.99	0.190515	0.34168	0.557582	0.57713	0.810855
ENSG00000000457	SCYL3	1489.52	0.588778	0.222688	2.64396	0.00819435	0.0741247
ENSG00000000460	C1orf112	700.154	0.525295	0.744204	0.705848	0.480283	0.748496
ENSG00000000938	FGR	157.443	-0.135117	0.557519	-0.242354	0.808506	0.927652
ENSG00000000971	CFH	111.2	-0.327476	0.373367	-0.877091	0.380437	0.672499
ENSG00000001036	FUCA2	493.646	-0.144914	0.403483	-0.359157	0.719478	0.887502
ENSG00000001084	GCLC	1637.07	-0.0944942	0.289692	-0.326188	0.744282	0.900232
ENSG00000001167	NFYA	2353.56	1.29078	0.29525	4.37181	1.23219e-05	0.000579506
ENSG00000001460	STPG1	382.459	-0.39355	0.17762	-2.21569	0.0267129	0.155494
ENSG00000001461	NIPAL3	3041.64	-0.45586	0.208532	-2.18604	0.0288127	0.163314
ENSG00000001497	LAS1L	3728.22	0.707145	0.457225	1.5466	0.121959	0.377979
ENSG00000001561	ENPP4	858.987	0.122603	0.522737	0.234541	0.814565	0.930606
ENSG00000001617	SEMA3F	5.30227	-1.73224	1.66779	-1.03865	0.29897	NA
ENSG00000001626	CFTR	24.8971	-0.443234	0.545766	-0.812132	0.416716	0.702356
ENSG00000001629	ANKIB1	2161.2	0.496776	0.426817	1.16391	0.244462	0.545462
ENSG00000001630	CYP51A1	1520.52	1.57194	0.423451	3.7122	0.000205463	0.00520231
ENSG00000001631	KRIT1	1853.27	-0.0520836	0.479468	-0.108628	0.913498	0.967211
ENSG00000002016	RAD52	941.965	-0.409652	0.439439	-0.932217	0.351225	0.649045
ENSG00000002079	MYH16	5.65082	-0.225858	0.917517	-0.246163	0.805556	NA
ENSG00000002330	BAD	1059.74	-0.504217	0.439824	-1.14641	0.251627	0.553471
ENSG00000002549	LAP3	3762.94	1.86846	0.641216	2.91393	0.00356908	0.0417876
ENSG00000002586	CD99	7216.37	-0.155978	0.243196	-0.641366	0.521285	0.775374
ENSG00000002587	HS3ST1	36.619	0.563583	0.895742	0.629179	0.529232	0.781058
ENSG00000002726	AOC1	38.9027	0.287015	0.763743	0.3758	0.707066	0.881674
ENSG00000002745	WNT16	7.43983	-0.208201	1.08248	-0.192338	0.847477	0.943519
ENSG00000002746	HECW1	9.21977	-1.12397	1.46683	-0.766254	0.443525	0.724118
ENSG00000002822	MAD1L1	3942.3	-1.33461	0.502718	-2.65478	0.00793606	0.0726303
ENSG00000002834	LASP1	11677.4	-0.423647	0.446116	-0.949635	0.342298	0.641848
ENSG00000002919	SNX11	1682.98	0.328771	0.332558	0.988613	0.322853	0.624959
ENSG00000002933	TMEM176A	52.2402	0.473042	0.631314	0.749297	0.453678	0.730242
ENSG00000003056	M6PR	10355.3	0.84658	0.300181	2.82023	0.0047989	0.0513727
ENSG00000003096	KLHL13	76.8713	-0.992673	0.666255	-1.48993	0.136243	0.402423
ENSG00000003137	CYP26B1	7.2921	1.06651	1.07299	0.99396	0.320242	0.62319
ENSG00000003147	ICA1	112.285	-0.475354	0.492381	-0.965419	0.334335	0.634551
ENSG00000003249	DBNDD1	78.2902	-1.18151	0.594997	-1.98575	0.0470615	0.218989
ENSG00000003393	ALS2	730.402	0.308416	0.321251	0.960047	0.337031	0.637105
ENSG00000003400	CASP10	3091.64	1.31915	0.290058	4.5479	5.41826e-06	0.000297654
ENSG00000003402	CFLAR	11818	1.83414	0.550139	3.33395	0.000856228	0.0149523
ENSG00000003436	TFPI	383.192	0.202953	0.434568	0.467021	0.640485	0.846895
ENSG00000003509	NDUFAF7	923.745	0.242851	0.291851	0.832104	0.40535	0.692373
ENSG00000003756	RBM5	11400.7	-0.25573	0.343177	-0.745184	0.456161	0.731837
ENSG00000003987	MTMR7	85.5654	0.0956286	0.530714	0.180188	0.857005	0.946709
ENSG00000004059	ARF5	6526.55	-0.198586	0.375635	-0.528669	0.597035	0.821251
ENSG00000004139	SARM1	2027.12	-0.149766	0.404015	-0.370695	0.710865	0.883911
ENSG00000004142	POLDIP2	5419.96	0.414097	0.525976	0.787292	0.431111	0.714522
ENSG00000004399	PLXND1	785.226	-0.557631	0.400179	-1.39345	0.163483	0.443007
ENSG00000004455	AK2	7481.21	0.747162	0.53093	1.40727	0.159347	0.438131
ENSG00000004468	CD38	2422.03	2.67993	0.838081	3.1977	0.0013853	0.0210325
ENSG00000004478	FKBP4	9003.64	1.38629	0.64541	2.14793	0.0317197	0.173286
ENSG00000004487	KDM1A	4323.91	0.195764	0.249914	0.783328	0.433434	0.716495
ENSG00000004534	RBM6	7033.01	-0.0763311	0.288781	-0.264322	0.791532	0.919838
ENSG00000004660	CAMKK1	510.629	0.350184	0.269186	1.3009	0.193293	0.48335
ENSG00000004700	RECQL	2871.48	-0.15478	0.728383	-0.212498	0.831719	0.93703
ENSG00000004766	VPS50	1092.46	-0.249678	0.343086	-0.727742	0.466772	0.738879
ENSG00000004776	HSPB6	5.32166	1.40371	1.95182	0.719177	0.472032	NA
ENSG00000004777	ARHGAP33	304.967	-1.14345	0.551602	-2.07296	0.0381759	0.192294
ENSG00000004779	NDUFAB1	3606.07	0.812051	0.520662	1.55965	0.118842	0.372685
ENSG00000004799	PDK4	5.87136	-2.75312	1.14227	-2.41023	0.0159425	NA
ENSG00000004809	SLC22A16	79.0809	-0.628461	0.313688	-2.00346	0.0451283	0.212809
ENSG00000004838	ZMYND10	134.713	-0.388437	0.384659	-1.00982	0.31258	0.615517
ENSG00000004846	ABCB5	9.20618	-0.5664	1.07442	-0.527166	0.598078	0.821942
ENSG00000004848	ARX	24.149	3.05269	1.41646	2.15516	0.0311496	0.171504
ENSG00000004864	SLC25A13	338.441	-0.0180816	0.498493	-0.0362725	0.971065	0.989274
ENSG00000004866	ST7	266.843	0.661107	0.483436	1.36752	0.171463	0.453263
ENSG00000004897	CDC27	2383.01	0.351198	0.419281	0.83762	0.402244	0.690207
ENSG00000004939	SLC4A1	16.4116	-0.43381	0.679298	-0.638615	0.523073	0.77672
ENSG00000004948	CALCR	0.578198	0	6.34336	0	1	NA
ENSG00000004961	HCCS	1256.06	0.839319	0.41296	2.03245	0.0421086	0.204671
ENSG00000004975	DVL2	2981.75	0.157949	0.217949	0.724705	0.468633	0.739835
ENSG00000005001	PRSS22	6.51396	-2.56179	1.04105	-2.46076	0.0138642	NA
ENSG00000005007	UPF1	10530.7	0.386525	0.274192	1.40969	0.158632	0.437306
ENSG00000005020	SKAP2	475.3	-0.0506339	0.429419	-0.117913	0.906137	0.964801
ENSG00000005022	SLC25A5	16921.6	1.00021	0.595992	1.67822	0.0933042	0.32711
ENSG00000005059	MCUB	7250.38	-0.358528	0.277282	-1.29301	0.196007	0.486627
ENSG00000005073	HOXA11	1.12032	1.35195	2.24341	0.60263	0.546755	NA
ENSG00000005075	POLR2J	2847.41	-0.0898743	0.381382	-0.235654	0.813701	0.930155
ENSG00000005100	DHX33	1968.63	0.800475	0.470573	1.70107	0.0889308	0.319002
ENSG00000005102	MEOX1	351.277	-1.25658	0.418476	-3.00276	0.00267544	0.0339197
ENSG00000005108	THSD7A	25.082	-0.749731	1.01822	-0.736317	0.461538	0.735395
ENSG00000005156	LIG3	2439.08	0.852297	0.34182	2.49341	0.0126524	0.0979001
ENSG00000005175	RPAP3	1717.86	0.520852	0.337957	1.54118	0.123273	0.379995
ENSG00000005187	ACSM3	512.78	-0.59785	0.362058	-1.65125	0.0986867	0.33735
ENSG00000005189	REXO5	203.229	-1.08623	0.690761	-1.57251	0.115832	0.366842
ENSG00000005194	CIAPIN1	2650.09	0.367749	0.475859	0.77281	0.439635	0.720699
ENSG00000005206	SPPL2B	5254.03	-0.633261	0.307763	-2.05762	0.0396262	0.197297
ENSG00000005238	FAM214B	387.176	-1.37561	0.313439	-4.38875	1.14002e-05	0.000551218
ENSG00000005243	COPZ2	42.4008	-1.28869	0.643268	-2.00334	0.0451407	0.212827
ENSG00000005249	PRKAR2B	80.7971	-0.870189	0.578375	-1.50454	0.132442	0.3962
ENSG00000005302	MSL3	8707.14	0.276983	0.288915	0.958703	0.337708	0.637647
ENSG00000005339	CREBBP	6720.32	0.25615	0.382979	0.668834	0.503601	0.763173
ENSG00000005379	TSPOAP1	417.115	0.29687	0.422749	0.702237	0.482531	0.750005
ENSG00000005381	MPO	417.698	-0.560972	0.78731	-0.712518	0.476144	0.745668
ENSG00000005421	PON1	2.87798	-1.90033	1.8673	-1.01769	0.308826	NA
ENSG00000005436	GCFC2	1460.51	0.5837	0.357006	1.63499	0.102052	0.344007
ENSG00000005448	WDR54	1412.38	-1.60449	0.511973	-3.13393	0.00172479	0.0246223
ENSG00000005469	CROT	579.577	-0.698023	0.326161	-2.14012	0.0323453	0.174967
ENSG00000005471	ABCB4	12.0163	-0.140513	1.02124	-0.13759	0.890564	0.959761
ENSG00000005483	KMT2E	7240.03	0.192757	0.409033	0.471251	0.637462	0.84531
ENSG00000005486	RHBDD2	3226.5	0.270656	0.331916	0.815433	0.414825	0.700595
ENSG00000005513	SOX8	595.689	0.824899	0.500182	1.6492	0.0991073	0.338203
ENSG00000005700	IBTK	2094.21	0.117053	0.462873	0.252885	0.800357	0.92376
ENSG00000005801	ZNF195	1518.89	0.643855	0.294513	2.18617	0.0288033	0.163314
ENSG00000005810	MYCBP2	5957.22	-0.0877995	0.415034	-0.211548	0.83246	0.937246
ENSG00000005812	FBXL3	4905.76	-0.353871	0.427731	-0.82732	0.408055	0.694801
ENSG00000005844	ITGAL	19987.7	-0.93023	0.412842	-2.25324	0.0242443	0.14646
ENSG00000005882	PDK2	1229.99	-1.19232	0.372198	-3.20345	0.00135791	0.0207628
ENSG00000005884	ITGA3	761.477	-0.253546	0.489304	-0.518176	0.604335	0.825523
ENSG00000005889	ZFX	2746.71	0.701455	0.494197	1.41938	0.155787	0.43318
ENSG00000005893	LAMP2	2907.77	0.144583	0.243193	0.594522	0.552163	0.795321
ENSG00000005961	ITGA2B	328.579	0.437462	0.688779	0.635127	0.525346	0.778024
ENSG00000005981	ASB4	63.1255	-0.340861	0.408146	-0.835146	0.403636	0.691217
ENSG00000006007	GDE1	1491.46	-0.0060012	0.317426	-0.0189058	0.984916	0.994725
ENSG00000006015	REX1BD	5243.97	-1.04285	0.39852	-2.61681	0.00887548	0.0777623
ENSG00000006016	CRLF1	169.647	1.17139	0.370443	3.16214	0.00156615	0.0228385
ENSG00000006025	OSBPL7	1009.2	-1.05251	0.385646	-2.7292	0.00634885	0.0625966
ENSG00000006042	TMEM98	16.9191	-0.990903	0.733327	-1.35124	0.176618	0.459973
ENSG00000006047	YBX2	7.29118	0.188984	1.41206	0.133836	0.893532	0.960755
ENSG00000006062	MAP3K14	2668.86	0.636417	0.248617	2.55983	0.0104724	0.0870732
ENSG00000006071	ABCC8	9.86182	-0.551491	0.708533	-0.778356	0.436359	0.718391
ENSG00000006116	CACNG3	3.15726	3.25308	1.39518	2.33166	0.0197186	NA
ENSG00000006118	TMEM132A	23.0319	-0.712147	0.690258	-1.03171	0.302207	0.604809
ENSG00000006125	AP2B1	10165.4	0.493131	0.35721	1.38051	0.16743	0.447845
ENSG00000006128	TAC1	1.17318	1.00643	6.34336	0.158658	0.873938	NA
ENSG00000006194	ZNF263	3111.17	0.884675	0.252906	3.49804	0.000468693	0.0098674
ENSG00000006210	CX3CL1	11.8921	-0.141446	0.611471	-0.231321	0.817065	0.931351
ENSG00000006282	SPATA20	363.415	-1.09766	0.583362	-1.88161	0.0598887	0.254262
ENSG00000006283	CACNA1G	6.35423	1.4667	0.89265	1.64309	0.100365	NA
ENSG00000006327	TNFRSF12A	223.079	3.06865	0.715464	4.28904	1.79448e-05	0.000772096
ENSG00000006377	DLX6	4.84864	-1.56951	0.969143	-1.61948	0.105344	NA
ENSG00000006432	MAP3K9	410.926	-0.175027	0.329425	-0.53131	0.595204	0.82032
ENSG00000006451	RALA	3620.82	0.890744	0.253449	3.51449	0.000440592	0.00942085
ENSG00000006453	BAIAP2L1	122.686	0.749152	0.627344	1.19417	0.232413	0.531344
ENSG00000006459	KDM7A	5947.83	-0.247981	0.725303	-0.3419	0.732426	0.894418
ENSG00000006468	ETV1	4.46583	-0.310987	1.16389	-0.267196	0.789318	NA
ENSG00000006530	AGK	2768.7	0.281904	0.278535	1.0121	0.311492	0.614308
ENSG00000006534	ALDH3B1	155.738	-1.31885	0.622025	-2.12025	0.0339846	0.180064
ENSG00000006555	TTC22	693.881	-0.614333	0.238641	-2.5743	0.0100444	0.0845429
ENSG00000006576	PHTF2	1817.06	0.197091	0.429772	0.458594	0.646526	0.84981
ENSG00000006607	FARP2	794.538	0.538652	0.354158	1.52094	0.128275	0.388216
ENSG00000006611	USH1C	1.19863	-2.65511	2.57384	-1.03157	0.302271	NA
ENSG00000006625	GGCT	1571.29	0.631837	0.481925	1.31107	0.189834	0.477954
ENSG00000006634	DBF4	1530.48	0.401971	0.719484	0.558693	0.576371	0.810581
ENSG00000006638	TBXA2R	213.732	-1.42594	0.35261	-4.04396	5.25562e-05	0.00180651
ENSG00000006652	IFRD1	2129.52	0.574946	0.34432	1.6698	0.0949588	0.330313
ENSG00000006659	LGALS14	66.6984	2.88605	0.972628	2.96727	0.00300457	0.0366248
ENSG00000006695	COX10	1007.19	0.800965	0.43774	1.82977	0.0672836	0.271711
ENSG00000006704	GTF2IRD1	166.082	-0.291734	0.537252	-0.543012	0.587122	0.815673
ENSG00000006712	PAF1	4191.85	0.684304	0.362816	1.88609	0.0592826	0.252467
ENSG00000006715	VPS41	2006.86	0.225767	0.336755	0.670419	0.50259	0.76274
ENSG00000006740	ARHGAP44	80.4458	-0.618126	0.347961	-1.77642	0.0756634	0.290507
ENSG00000006744	ELAC2	5040.83	0.248697	0.39015	0.637439	0.523839	0.77734
ENSG00000006747	SCIN	94.9728	0.556028	0.482888	1.15146	0.249542	0.550903
ENSG00000006756	ARSD	226.942	-0.0806113	0.270509	-0.297999	0.765704	0.908869
ENSG00000006757	PNPLA4	546.845	-0.366946	0.486965	-0.753537	0.451127	0.728764
ENSG00000006831	ADIPOR2	3113.43	0.737657	0.251484	2.93322	0.0033547	0.0399045
ENSG00000006837	CDKL3	145.993	0.200248	0.42291	0.473501	0.635856	0.844798
ENSG00000007001	UPP2	2.84856	-0.280131	1.57573	-0.177779	0.858897	NA
ENSG00000007038	PRSS21	321.085	0.143406	0.551587	0.259988	0.794873	0.921288
ENSG00000007047	MARK4	1203.86	-0.108071	0.282728	-0.382243	0.702281	0.879556
ENSG00000007062	PROM1	71.5041	-0.195842	0.659436	-0.296984	0.766479	0.909362
ENSG00000007080	CCDC124	4754.14	0.755608	0.612451	1.23374	0.217298	0.513237
ENSG00000007129	CEACAM21	1181.23	-0.0187791	0.219799	-0.0854374	0.931914	0.973486
ENSG00000007168	PAFAH1B1	8074.22	0.0739128	0.186581	0.396143	0.691999	0.874405
ENSG00000007171	NOS2	8.17282	-0.943393	0.94621	-0.997022	0.318754	0.621719
ENSG00000007174	DNAH9	3.08945	-0.518899	1.59921	-0.324472	0.745581	NA
ENSG00000007202	KIAA0100	8082.18	0.380602	0.349444	1.08916	0.276082	0.579947
ENSG00000007237	GAS7	149.598	0.306376	0.532699	0.57514	0.565197	0.802816
ENSG00000007255	TRAPPC6A	1939.61	-0.939573	0.389434	-2.41266	0.0158364	0.112554
ENSG00000007264	MATK	2409.27	1.77388	0.760076	2.33382	0.0196052	0.128702
ENSG00000007312	CD79B	863.358	-1.70395	0.499847	-3.40895	0.000652131	0.0125682
ENSG00000007314	SCN4A	7.82961	0.461317	1.0888	0.423694	0.671789	0.864754
ENSG00000007341	ST7L	477.121	-0.252463	0.197305	-1.27956	0.200701	0.493255
ENSG00000007350	TKTL1	90.7901	-4.59876	0.914001	-5.03147	4.86741e-07	4.08846e-05
ENSG00000007372	PAX6	9.4614	1.44571	0.949709	1.52227	0.127941	0.387588
ENSG00000007376	RPUSD1	2196.71	0.00923767	0.503058	0.018363	0.985349	0.994749
ENSG00000007384	RHBDF1	10.3816	-1.19842	0.692571	-1.73039	0.0835607	0.307568
ENSG00000007392	LUC7L	5374.6	-0.291561	0.309222	-0.942886	0.345739	0.644812
ENSG00000007402	CACNA2D2	295.091	-1.18352	0.518158	-2.28409	0.0223663	0.139321
ENSG00000007516	BAIAP3	112.074	-0.88466	0.779117	-1.13546	0.256181	0.558595
ENSG00000007520	TSR3	4888.5	-0.0124056	0.441689	-0.0280867	0.977593	0.991942
ENSG00000007541	PIGQ	1727.41	-0.326583	0.329274	-0.991828	0.321281	0.623963
ENSG00000007545	CRAMP1	2186.99	0.321191	0.264881	1.21259	0.225288	0.522727
ENSG00000007866	TEAD3	61.6578	2.66814	0.943383	2.82826	0.00468012	0.0506074
ENSG00000007908	SELE	2.13025	2.68655	2.17654	1.23432	0.217083	NA
ENSG00000007923	DNAJC11	3308.98	0.587213	0.428053	1.37182	0.170118	0.451258
ENSG00000007933	FMO3	26.3105	-0.670541	0.564181	-1.18852	0.234629	0.533614
ENSG00000007944	MYLIP	1010.54	-0.349138	0.283981	-1.22944	0.218907	0.515024
ENSG00000007952	NOX1	44.7355	0.354826	0.385323	0.920854	0.357127	0.653397
ENSG00000007968	E2F2	1139.62	-1.15543	0.903803	-1.27841	0.201106	0.49364
ENSG00000008018	PSMB1	8280.4	0.759325	0.509655	1.48988	0.136256	0.402423
ENSG00000008056	SYN1	32.9123	0.0422385	0.840081	0.0502791	0.9599	0.984994
ENSG00000008083	JARID2	2638.86	1.57088	0.267168	5.87973	4.10934e-09	7.25243e-07
ENSG00000008086	CDKL5	335.027	0.0374705	0.393296	0.0952732	0.924098	0.970212
ENSG00000008118	CAMK1G	4.52355	4.73966	1.96441	2.41276	0.0158323	NA
ENSG00000008128	CDK11A	4719.39	0.00820899	0.243232	0.0337497	0.973077	0.990251
ENSG00000008130	NADK	3399.31	0.853415	0.36941	2.31021	0.0208765	0.133626
ENSG00000008226	DLEC1	311.972	-0.971619	0.653911	-1.48586	0.137317	0.404149
ENSG00000008256	CYTH3	637.586	0.673915	0.466218	1.44549	0.14832	0.421854
ENSG00000008277	ADAM22	154.798	-0.74692	0.29121	-2.56489	0.0103209	0.0861623
ENSG00000008282	SYPL1	2964.55	-0.49826	0.248814	-2.00254	0.045227	0.213153
ENSG00000008283	CYB561	858.831	0.0796683	0.391976	0.203248	0.838941	0.93949
ENSG00000008294	SPAG9	2595.1	0.808553	0.355598	2.27378	0.022979	0.141455
ENSG00000008300	CELSR3	677.2	0.764508	0.457428	1.67132	0.0946592	0.329697
ENSG00000008311	AASS	80.9611	-0.200399	0.499031	-0.401576	0.687996	0.87265
ENSG00000008323	PLEKHG6	16.1895	1.08737	0.648518	1.6767	0.0936006	0.32805
ENSG00000008324	SS18L2	1855.03	-0.253993	0.319836	-0.794137	0.427116	0.711628
ENSG00000008382	MPND	1157.75	-0.246494	0.46168	-0.533906	0.593407	0.819133
ENSG00000008394	MGST1	81.5293	-0.475938	0.419891	-1.13348	0.257014	0.559272
ENSG00000008405	CRY1	1901.74	0.79927	0.325796	2.45328	0.0141558	0.10506
ENSG00000008438	PGLYRP1	7.85382	0.366113	0.636216	0.575453	0.564985	0.802816
ENSG00000008441	NFIX	719.319	2.59632	0.564994	4.5953	4.32128e-06	0.000253821
ENSG00000008513	ST3GAL1	7335.66	0.0984332	0.235538	0.417909	0.676014	0.867127
ENSG00000008516	MMP25	934.564	-0.319442	0.323378	-0.98783	0.323236	0.625221
ENSG00000008517	IL32	45402.7	0.101567	0.631361	0.160869	0.872196	0.953972
ENSG00000008710	PKD1	4390.66	-0.565825	0.232978	-2.42866	0.0151547	0.109762
ENSG00000008735	MAPK8IP2	43.2272	-0.209824	0.64588	-0.324866	0.745283	0.900448
ENSG00000008838	MED24	3874.81	0.010635	0.356222	0.0298549	0.976183	0.99141
ENSG00000008853	RHOBTB2	424.839	-0.659646	0.532271	-1.2393	0.215233	0.510826
ENSG00000008869	HEATR5B	2401.55	-0.517061	0.374109	-1.38211	0.166937	0.447062
ENSG00000008952	SEC62	8880.49	-0.184702	0.424266	-0.435344	0.663313	0.860402
ENSG00000008988	RPS20	110503	-0.554616	0.310815	-1.78439	0.0743597	0.287114
ENSG00000009307	CSDE1	29200.7	0.188301	0.287528	0.654898	0.512534	0.770083
ENSG00000009335	UBE3C	4744.03	0.93368	0.390044	2.39378	0.0166755	0.116294
ENSG00000009413	REV3L	828.558	-0.203674	0.344687	-0.590896	0.55459	0.796837
ENSG00000009694	TENM1	333.698	-0.745408	0.903929	-0.824632	0.409581	0.696242
ENSG00000009724	MASP2	309.921	-0.144527	0.694619	-0.208067	0.835177	0.938317
ENSG00000009765	IYD	47.9882	-1.23965	0.660068	-1.87807	0.0603716	0.255398
ENSG00000009780	FAM76A	884.269	-0.557053	0.386609	-1.44087	0.149622	0.423754
ENSG00000009790	TRAF3IP3	14884.7	-1.27623	0.36099	-3.53535	0.000407232	0.00890087
ENSG00000009830	POMT2	523.047	0.710096	0.506868	1.40095	0.161229	0.440023
ENSG00000009844	VTA1	2378.06	0.405375	0.374575	1.08222	0.279153	0.582421
ENSG00000009950	MLXIPL	17.862	-0.456151	0.540571	-0.843831	0.398764	0.687349
ENSG00000009954	BAZ1B	7369.56	0.288834	0.340721	0.847714	0.396597	0.685428
ENSG00000010017	RANBP9	3546.43	0.822988	0.287348	2.86408	0.00418216	0.0465839
ENSG00000010030	ETV7	1056.86	6.0321	0.836612	7.21015	5.58884e-13	2.75094e-10
ENSG00000010072	SPRTN	612.047	0.603152	0.351527	1.7158	0.086198	0.31385
ENSG00000010165	METTL13	3478.78	0.343317	0.418656	0.820046	0.41219	0.698458
ENSG00000010219	DYRK4	750.611	0.0498449	0.252112	0.197709	0.843273	0.941699
ENSG00000010244	ZNF207	11982.6	0.705791	0.415811	1.69738	0.0896243	0.320166
ENSG00000010256	UQCRC1	6260.22	0.112349	0.519354	0.216326	0.828734	0.935724
ENSG00000010270	STARD3NL	1140.76	0.653495	0.239249	2.73144	0.00630577	0.0622508
ENSG00000010278	CD9	457.426	-1.76485	0.555061	-3.17956	0.00147497	0.0218545
ENSG00000010292	NCAPD2	6402.9	-0.548247	0.588178	-0.932111	0.351279	0.64907
ENSG00000010295	IFFO1	2101.22	-1.10644	0.333024	-3.32239	0.000892484	0.015414
ENSG00000010310	GIPR	153.313	0.677553	0.333607	2.03099	0.0422559	0.205001
ENSG00000010318	PHF7	357.2	-0.906971	0.356954	-2.54086	0.0110579	0.0901973
ENSG00000010319	SEMA3G	15.2779	-0.3328	0.686908	-0.484491	0.628038	0.840097
ENSG00000010322	NISCH	7446.2	-0.135657	0.204475	-0.66344	0.507049	0.766004
ENSG00000010327	STAB1	95.5315	-0.73143	0.684217	-1.069	0.285068	0.587589
ENSG00000010361	FUZ	800.612	-1.30389	0.378724	-3.44286	0.000575604	0.0114435
ENSG00000010379	SLC6A13	9.03571	0.843721	0.77764	1.08498	0.277932	0.581899
ENSG00000010404	IDS	9592.39	-0.189035	0.344641	-0.548499	0.58335	0.813911
ENSG00000010438	PRSS3	7.12914	-1.43545	1.55718	-0.921829	0.356618	0.653242
ENSG00000010539	ZNF200	1492.61	0.194743	0.207292	0.939462	0.347494	0.646009
ENSG00000010610	CD4	16412	-1.19163	0.429405	-2.77507	0.00551894	0.0568914
ENSG00000010626	LRRC23	300.991	-0.687582	0.417138	-1.64833	0.0992843	0.338493
ENSG00000010671	BTK	454.294	0.906623	0.522385	1.73554	0.0826444	0.305859
ENSG00000010704	HFE	119.97	-0.262558	0.590979	-0.444277	0.656843	0.855909
ENSG00000010803	SCMH1	977.637	0.488279	0.291682	1.67401	0.0941288	0.329016
ENSG00000010810	FYN	17665.6	0.410031	0.186378	2.2	0.0278071	0.159972
ENSG00000010818	HIVEP2	6943.93	1.6014	0.340609	4.70157	2.58172e-06	0.00016333
ENSG00000010932	FMO1	1.28039	1.08296	2.69647	0.401621	0.687963	NA
ENSG00000011007	ELOA	3556.23	1.13855	0.518035	2.19782	0.0279619	0.160541
ENSG00000011009	LYPLA2	5263.46	0.319507	0.502683	0.635604	0.525035	0.778024
ENSG00000011021	CLCN6	824.855	0.411689	0.300326	1.37081	0.170435	0.451759
ENSG00000011028	MRC2	569.444	0.807859	0.611685	1.32071	0.186598	0.473342
ENSG00000011052	NME1-NME2	1047.86	3.35004	0.886569	3.77865	0.000157679	0.00423969
ENSG00000011105	TSPAN9	77.0279	-0.437901	0.489578	-0.894446	0.371083	0.663652
ENSG00000011114	BTBD7	1412.56	-0.0355589	0.23485	-0.151411	0.879652	0.955778
ENSG00000011132	APBA3	3077.13	0.614207	0.257983	2.3808	0.0172749	0.118654
ENSG00000011143	MKS1	912.473	-0.575757	0.216097	-2.66434	0.00771388	0.0712369
ENSG00000011198	ABHD5	683.81	1.11429	0.451619	2.46733	0.0136126	0.102329
ENSG00000011201	ANOS1	44.8853	-0.826534	0.878973	-0.940341	0.347043	0.645632
ENSG00000011243	AKAP8L	4463.85	-0.63615	0.334739	-1.90044	0.0573758	0.248037
ENSG00000011258	MBTD1	1677.12	-0.0427139	0.566917	-0.0753442	0.939941	0.976691
ENSG00000011260	UTP18	3274.79	0.768994	0.291448	2.63853	0.00832672	0.0747085
ENSG00000011275	RNF216	8075.17	-0.0397106	0.343904	-0.11547	0.908072	0.965199
ENSG00000011295	TTC19	2466.57	0.163031	0.15058	1.08268	0.278949	0.582408
ENSG00000011304	PTBP1	29475.4	0.723933	0.503451	1.43794	0.15045	0.425333
ENSG00000011332	DPF1	35.6935	0.611705	0.837428	0.730457	0.465111	0.737458
ENSG00000011347	SYT7	6.50059	3.76317	1.99001	1.89103	0.0586202	NA
ENSG00000011376	LARS2	1188	0.962064	0.4609	2.08736	0.0368556	0.189305
ENSG00000011405	PIK3C2A	1233.39	0.554792	0.384114	1.44434	0.148643	0.422445
ENSG00000011422	PLAUR	255.458	0.809464	0.3327	2.43302	0.0149736	0.108803
ENSG00000011426	ANLN	437.259	-0.733694	1.18592	-0.618671	0.536133	0.785117
ENSG00000011451	WIZ	2865.93	1.04176	0.40782	2.55446	0.0106353	0.0879435
ENSG00000011454	RABGAP1	1801.65	0.314716	0.356999	0.88156	0.378015	0.66987
ENSG00000011465	DCN	10.1121	-1.58994	1.24076	-1.28143	0.200043	0.492425
ENSG00000011478	QPCTL	817.975	-0.135091	0.241592	-0.559171	0.576045	0.810528
ENSG00000011485	PPP5C	3877.78	0.735877	0.562314	1.30866	0.19065	0.478735
ENSG00000011523	CEP68	1985.84	-1.14597	0.560518	-2.04447	0.0409067	0.201472
ENSG00000011566	MAP4K3	470.103	0.284804	0.242125	1.17627	0.239488	0.539401
ENSG00000011590	ZBTB32	544.618	1.06302	0.903893	1.17604	0.239577	0.539454
ENSG00000011600	TYROBP	336.186	-0.702245	0.6043	-1.16208	0.245203	0.546027
ENSG00000011638	TMEM159	621.88	-1.09166	0.238392	-4.57926	4.66619e-06	0.000269576
ENSG00000011677	GABRA3	2.36994	-0.892162	1.25736	-0.709554	0.477981	NA
ENSG00000012048	BRCA1	750.909	-0.32206	0.73724	-0.436845	0.662223	0.860064
ENSG00000012061	ERCC1	3108.78	0.681688	0.49557	1.37556	0.168957	0.449924
ENSG00000012124	CD22	98.6316	0.148101	0.442674	0.334559	0.737958	0.896972
ENSG00000012171	SEMA3B	30.885	-0.371471	0.68176	-0.544871	0.585842	0.815486
ENSG00000012174	MBTPS2	447.58	0.435235	0.393937	1.10483	0.269232	0.572114
ENSG00000012211	PRICKLE3	467.74	-0.248071	0.364037	-0.681446	0.495589	0.758332
ENSG00000012223	LTF	21.803	-0.984368	0.805485	-1.22208	0.221677	0.518739
ENSG00000012232	EXTL3	1293.11	-0.452909	0.362818	-1.24831	0.211918	0.506409
ENSG00000012504	NR1H4	3.2748	-0.592367	1.12166	-0.528118	0.597417	NA
ENSG00000012660	ELOVL5	5765.1	0.59931	0.204654	2.92841	0.00340705	0.0404288
ENSG00000012779	ALOX5	535.542	0.66552	0.526418	1.26424	0.206143	0.499743
ENSG00000012817	KDM5D	1975.33	0.185865	0.348317	0.533608	0.593613	0.819281
ENSG00000012822	CALCOCO1	3016.96	-1.01641	0.495611	-2.05082	0.0402848	0.199286
ENSG00000012963	UBR7	2135.38	-0.275141	0.421332	-0.653026	0.513739	0.770907
ENSG00000012983	MAP4K5	1201.15	0.541144	0.395267	1.36906	0.170981	0.452571
ENSG00000013016	EHD3	213.116	-0.951104	0.41239	-2.30632	0.0210927	0.134204
ENSG00000013275	PSMC4	5976.4	1.13293	0.509051	2.22557	0.0260428	0.153225
ENSG00000013288	MAN2B2	3409.29	-0.476728	0.273651	-1.7421	0.0814907	0.30347
ENSG00000013293	SLC7A14	41.5604	1.07366	0.403097	2.66353	0.00773253	0.0713823
ENSG00000013297	CLDN11	30.534	-0.46707	0.446938	-1.04505	0.296002	0.599242
ENSG00000013306	SLC25A39	8094.17	0.433089	0.490029	0.883804	0.376802	0.66896
ENSG00000013364	MVP	10302.1	0.10023	0.537703	0.186404	0.852128	0.945019
ENSG00000013374	NUB1	5470.83	0.402047	0.156065	2.57616	0.0099905	0.0842908
ENSG00000013375	PGM3	963.576	0.178454	0.51998	0.343194	0.731452	0.893832
ENSG00000013392	RWDD2A	398.619	-1.14928	0.543465	-2.11472	0.0344538	0.181293
ENSG00000013441	CLK1	17779	-0.903875	0.755842	-1.19585	0.231755	0.530776
ENSG00000013503	POLR3B	677.625	0.559531	0.403813	1.38562	0.165864	0.44603
ENSG00000013523	ANGEL1	1691.77	0.263325	0.238044	1.1062	0.268639	0.57168
ENSG00000013561	RNF14	1574.26	0.155798	0.265214	0.587443	0.556906	0.797928
ENSG00000013563	DNASE1L1	1003.49	-0.882529	0.333484	-2.64639	0.00813555	0.0738328
ENSG00000013573	DDX11	3203.14	-0.652602	0.447018	-1.4599	0.144317	0.415073
ENSG00000013583	HEBP1	1139.26	-1.15928	0.300888	-3.85286	0.000116745	0.00336835
ENSG00000013588	GPRC5A	119.18	-0.0784252	0.426488	-0.183886	0.854103	0.946075
ENSG00000013619	MAMLD1	120.863	2.93707	0.713897	4.11414	3.8863e-05	0.00144262
ENSG00000013725	CD6	28299.6	0.271271	0.361812	0.749758	0.4534	0.730086
ENSG00000013810	TACC3	11006.7	-0.939454	0.349809	-2.68562	0.00723963	0.0681355
ENSG00000014123	UFL1	2460.46	-0.260309	0.544273	-0.47827	0.632458	0.84265
ENSG00000014138	POLA2	2233.75	-0.26983	0.572919	-0.470975	0.637659	0.845368
ENSG00000014164	ZC3H3	2058.32	0.0665252	0.362825	0.183353	0.854521	0.946132
ENSG00000014216	CAPN1	5481.2	-0.73056	0.419949	-1.73964	0.0819222	0.30428
ENSG00000014257	ACPP	24.216	1.31843	0.561991	2.346	0.0189762	0.125882
ENSG00000014641	MDH1	5430.75	0.0995812	0.321702	0.309545	0.756907	0.905779
ENSG00000014824	SLC30A9	1980.54	0.0624797	0.485946	0.128573	0.897695	0.962288
ENSG00000014914	MTMR11	36.9963	-0.0906921	0.705114	-0.12862	0.897658	0.962288
ENSG00000014919	COX15	1551.31	-0.365675	0.1936	-1.88881	0.058917	0.251606
ENSG00000015133	CCDC88C	6912.38	-0.245755	0.227036	-1.08245	0.279052	0.582408
ENSG00000015153	YAF2	1435.67	0.410529	0.284236	1.44432	0.148648	0.422445
ENSG00000015171	ZMYND11	3020.52	0.00771518	0.363866	0.0212034	0.983083	0.993947
ENSG00000015285	WAS	5656.59	-0.637503	0.367577	-1.73434	0.082858	0.306271
ENSG00000015475	BID	1794.01	0.588253	0.444067	1.3247	0.185272	0.471436
ENSG00000015479	MATR3	17319.6	0.548839	0.530824	1.03394	0.301165	0.603826
ENSG00000015520	NPC1L1	20.6567	0.539697	1.02232	0.527913	0.59756	0.82172
ENSG00000015532	XYLT2	2267.9	-0.415597	0.208663	-1.99172	0.046402	0.216822
ENSG00000015568	RGPD5	1024.87	0.753062	0.598657	1.25792	0.208421	0.502667
ENSG00000015592	STMN4	11.4298	-0.867467	0.68417	-1.26791	0.20483	0.498296
ENSG00000015676	NUDCD3	5029.01	-0.130141	0.356375	-0.365181	0.714976	0.885303
ENSG00000016391	CHDH	112.831	-0.715852	0.587599	-1.21827	0.223123	0.520599
ENSG00000016602	CLCA4	2.43887	-2.00311	2.1089	-0.949839	0.342194	NA
ENSG00000016864	GLT8D1	1964.56	-0.411144	0.190185	-2.16182	0.0306323	0.169787
ENSG00000017260	ATP2C1	2747.37	0.373842	0.243695	1.53406	0.125016	0.382778
ENSG00000017427	IGF1	2.26696	0	2.70909	0	1	NA
ENSG00000017483	SLC38A5	3059.63	1.56422	0.815102	1.91905	0.0549779	0.241187
ENSG00000017797	RALBP1	4472.93	-0.499441	0.180275	-2.77044	0.00559808	0.0573104
ENSG00000018189	RUFY3	664.439	-0.73974	0.30096	-2.45793	0.0139741	0.104312
ENSG00000018236	CNTN1	12.5938	-0.591212	1.19978	-0.492765	0.622179	0.837434
ENSG00000018280	SLC11A1	89.8521	-0.948161	0.564372	-1.68003	0.0929517	0.326585
ENSG00000018408	WWTR1	60.7952	0.403628	0.494264	0.816625	0.414143	0.70008
ENSG00000018510	AGPS	2463.18	0.978043	0.605496	1.61528	0.106251	0.35166
ENSG00000018610	CXorf56	1536.13	0.497963	0.246284	2.0219	0.0431862	0.207692
ENSG00000018625	ATP1A2	3.82667	0.664253	1.17975	0.563045	0.573404	NA
ENSG00000018699	TTC27	1688.96	0.808968	0.345669	2.34029	0.0192685	0.127196
ENSG00000018869	ZNF582	219.681	0.430468	0.411916	1.04504	0.296004	0.599242
ENSG00000019102	VSIG2	27.2859	-1.48902	0.740273	-2.01145	0.0442779	0.210738
ENSG00000019144	PHLDB1	287.475	2.429	0.347503	6.98986	2.75163e-12	1.07493e-09
ENSG00000019169	MARCO	9.52736	-0.290163	1.4405	-0.201432	0.840361	0.940279
ENSG00000019186	CYP24A1	15.1559	-0.0723076	0.757853	-0.0954112	0.923988	0.970212
ENSG00000019485	PRDM11	391.474	0.336511	0.402331	0.836404	0.402928	0.690836
ENSG00000019505	SYT13	5.74676	-0.773753	0.924315	-0.83711	0.402531	NA
ENSG00000019582	CD74	25495.5	1.43353	0.602996	2.37735	0.0174375	0.119155
ENSG00000019991	HGF	53.4884	2.6703	0.693994	3.84772	0.000119221	0.00342124
ENSG00000019995	ZRANB1	2082.17	0.0127754	0.333639	0.0382911	0.969456	0.98881
ENSG00000020129	NCDN	2016.74	0.605752	0.480389	1.26096	0.207323	0.501425
ENSG00000020181	ADGRA2	15.8152	-0.457787	0.578606	-0.791189	0.428834	0.712942
ENSG00000020219	CCT8L1P	1.07524	0.0560268	2.12185	0.0264046	0.978935	NA
ENSG00000020256	ZFP64	723.163	-0.446525	0.188092	-2.37398	0.0175975	0.119905
ENSG00000020426	MNAT1	575.674	0.352967	0.46967	0.751522	0.452339	0.729291
ENSG00000020577	SAMD4A	459.753	4.44851	0.455046	9.77596	1.42801e-22	3.91462e-19
ENSG00000020633	RUNX3	18435.6	1.19215	0.489161	2.43714	0.0148039	0.108154
ENSG00000020922	MRE11	2134.2	-0.0844446	0.585514	-0.144223	0.885324	0.957325
ENSG00000021300	PLEKHB1	2619.99	-1.28621	0.467383	-2.75194	0.00592442	0.0596099
ENSG00000021355	SERPINB1	5895.76	-0.175898	0.474727	-0.370525	0.710991	0.883911
ENSG00000021461	CYP3A43	13.9097	-0.561041	0.81902	-0.685016	0.493334	0.756901
ENSG00000021488	SLC7A9	35.2174	-1.18908	0.670806	-1.77261	0.0762938	0.292263
ENSG00000021574	SPAST	1214.08	-0.188043	0.453902	-0.414282	0.678668	0.868123
ENSG00000021645	NRXN3	15.1794	0.0236116	1.21817	0.0193829	0.984536	0.994598
ENSG00000021762	OSBPL5	709	-0.62261	0.451733	-1.37827	0.168121	0.448862
ENSG00000021776	AQR	2938.04	0.587218	0.311084	1.88765	0.0590728	0.251991
ENSG00000021826	CPS1	35.132	-0.440763	0.495434	-0.889651	0.373654	0.665859
ENSG00000022267	FHL1	1180.43	-0.048566	0.264468	-0.183636	0.854299	0.946075
ENSG00000022277	RTF2	5130.34	0.394417	0.333282	1.18343	0.236638	0.535875
ENSG00000022355	GABRA1	2.77193	-0.396417	1.5733	-0.251966	0.801068	NA
ENSG00000022556	NLRP2	668.392	0.270876	0.427778	0.633216	0.526592	0.779031
ENSG00000022567	SLC45A4	1621.16	1.34897	0.318489	4.23554	2.28008e-05	0.000933695
ENSG00000022840	RNF10	7675.04	-0.00309875	0.211276	-0.0146669	0.988298	0.995783
ENSG00000022976	ZNF839	1437.74	-0.12399	0.16404	-0.755852	0.449738	0.728288
ENSG00000023041	ZDHHC6	2853.9	-0.150144	0.231872	-0.64753	0.517289	0.77305
ENSG00000023171	GRAMD1B	781.261	-0.0596327	0.522695	-0.114087	0.909169	0.965296
ENSG00000023191	RNH1	9788.58	0.622717	0.397257	1.56754	0.116989	0.369063
ENSG00000023228	NDUFS1	3848	0.458819	0.376765	1.21779	0.223305	0.520913
ENSG00000023287	RB1CC1	1879.74	-0.33607	0.68688	-0.489271	0.62465	0.838743
ENSG00000023318	ERP44	2428.36	0.411592	0.181014	2.27382	0.022977	0.141455
ENSG00000023330	ALAS1	2076.53	0.359271	0.434933	0.826037	0.408783	0.695527
ENSG00000023445	BIRC3	12861.7	1.63003	0.531748	3.06542	0.00217362	0.0289632
ENSG00000023516	AKAP11	3308.92	0.312922	0.485166	0.644978	0.518941	0.773642
ENSG00000023572	GLRX2	2005.79	-0.462423	0.528177	-0.875507	0.381298	0.67318
ENSG00000023608	SNAPC1	724.632	0.625211	0.453796	1.37774	0.168285	0.449155
ENSG00000023697	DERA	838.502	-0.471614	0.50399	-0.93576	0.349397	0.647466
ENSG00000023734	STRAP	5336.52	0.904565	0.421813	2.14447	0.0319954	0.173789
ENSG00000023839	ABCC2	195.495	-0.8369	0.548713	-1.5252	0.127208	0.386556
ENSG00000023892	DEF6	14853.9	-0.801575	0.2638	-3.03857	0.00237706	0.031007
ENSG00000023902	PLEKHO1	7831.05	-0.857819	0.395146	-2.17089	0.0299394	0.167198
ENSG00000023909	GCLM	1609.59	1.05489	0.339479	3.10738	0.00188752	0.0262632
ENSG00000024048	UBR2	3041.29	0.1582	0.334524	0.472912	0.636276	0.844904
ENSG00000024422	EHD2	85.7381	-0.428868	0.660401	-0.649405	0.516077	0.772456
ENSG00000024526	DEPDC1	97.4679	0.622071	1.61625	0.384885	0.700322	0.878703
ENSG00000024862	CCDC28A	1341.85	-1.13602	0.330361	-3.43871	0.000584497	0.0115822
ENSG00000025039	RRAGD	769.312	0.51592	0.411963	1.25235	0.210444	0.50441
ENSG00000025156	HSF2	1535.89	-0.324495	0.364569	-0.890081	0.373423	0.665741
ENSG00000025293	PHF20	3133.46	-0.0645909	0.175739	-0.367539	0.713217	0.884593
ENSG00000025423	HSD17B6	53.9612	-1.46399	0.508538	-2.87882	0.00399169	0.0452717
ENSG00000025434	NR1H3	408.612	-0.890418	0.264368	-3.3681	0.000756886	0.0138909
ENSG00000025708	TYMP	10415.1	3.51328	0.892249	3.93755	8.23169e-05	0.00253628
ENSG00000025770	NCAPH2	5795.97	0.661256	0.497286	1.32973	0.183607	0.469035
ENSG00000025772	TOMM34	2222.4	1.33812	0.659877	2.02783	0.0425777	0.205992
ENSG00000025796	SEC63	3815.37	0.678026	0.325281	2.08443	0.0371213	0.189733
ENSG00000025800	KPNA6	5578.68	0.460246	0.248963	1.84865	0.0645088	0.265795
ENSG00000026025	VIM	45189.3	-0.0341479	0.36707	-0.0930282	0.925881	0.970878
ENSG00000026036	RTEL1-TNFRSF6B	492.185	0.315915	0.426202	0.741232	0.458553	0.732916
ENSG00000026103	FAS	1136.44	2.37507	0.543306	4.37152	1.23384e-05	0.000579506
ENSG00000026297	RNASET2	9388.73	-1.28853	0.358151	-3.59773	0.000321007	0.00737656
ENSG00000026508	CD44	31954.6	0.746031	0.322462	2.31355	0.0206926	0.133002
ENSG00000026559	KCNG1	28.5517	-1.1382	0.571382	-1.99202	0.0463692	0.216752
ENSG00000026652	AGPAT4	206.101	0.0834097	0.45687	0.182568	0.855137	0.946303
ENSG00000026751	SLAMF7	703.417	2.26703	0.499839	4.53551	5.74634e-06	0.000310139
ENSG00000026950	BTN3A1	8558.06	-0.0523422	0.606274	-0.0863342	0.931201	0.973237
ENSG00000027001	MIPEP	540.039	-0.66583	0.37007	-1.7992	0.0719871	0.281661
ENSG00000027075	PRKCH	11701.3	-0.0859504	0.120635	-0.712483	0.476166	0.745668
ENSG00000027644	INSRR	3.67198	3.22701	1.83445	1.75912	0.0785577	NA
ENSG00000027697	IFNGR1	1561.47	-0.106614	0.463846	-0.229847	0.818211	0.931857
ENSG00000027847	B4GALT7	1385.46	0.749954	0.293015	2.55944	0.0104842	0.0871121
ENSG00000027869	SH2D2A	7151.22	2.91401	0.777115	3.74978	0.000176992	0.00462906
ENSG00000028116	VRK2	687.653	0.70255	0.497837	1.4112	0.158185	0.436787
ENSG00000028137	TNFRSF1B	12637.5	1.57266	0.599309	2.62413	0.00868708	0.07674
ENSG00000028203	VEZT	1632.82	0.524625	0.380553	1.37859	0.168022	0.448755
ENSG00000028277	POU2F2	4729.89	0.65623	0.237327	2.76508	0.00569081	0.0578507
ENSG00000028310	BRD9	3895.52	0.379335	0.190128	1.99516	0.0460254	0.215717
ENSG00000028528	SNX1	6649.13	0.581251	0.244324	2.37902	0.017359	0.118871
ENSG00000028839	TBPL1	1284.76	0.278743	0.227406	1.22575	0.220293	0.51695
ENSG00000029153	ARNTL2	294.204	1.82211	0.84103	2.16652	0.0302712	0.168325
ENSG00000029363	BCLAF1	8445.16	0.532201	0.505877	1.05204	0.292783	0.595855
ENSG00000029364	SLC39A9	2437.84	0.407266	0.226422	1.7987	0.0720662	0.281821
ENSG00000029534	ANK1	438.197	0.354326	0.427861	0.828133	0.407595	0.694317
ENSG00000029639	TFB1M	702.637	0.00637001	0.275224	0.0231449	0.981535	0.993172
ENSG00000029725	RABEP1	3783.47	0.704949	0.326681	2.15791	0.0309348	0.170856
ENSG00000029993	HMGB3	558.135	0.593722	0.814853	0.728625	0.466231	0.738522
ENSG00000030066	NUP160	4105.01	0.369818	0.222281	1.66374	0.0961651	0.332738
ENSG00000030110	BAK1	3116.17	0.3059	0.544689	0.561605	0.574385	0.809806
ENSG00000030419	IKZF2	793.945	0.564077	0.386348	1.46002	0.144284	0.415026
ENSG00000030582	GRN	2050.29	-0.628341	0.409015	-1.53623	0.124482	0.381819
ENSG00000031003	FAM13B	2230.21	0.302043	0.43003	0.702377	0.482444	0.749964
ENSG00000031081	ARHGAP31	841.334	2.54288	0.51686	4.91986	8.66046e-07	6.53812e-05
ENSG00000031691	CENPQ	424.412	-0.447407	0.612403	-0.730576	0.465038	0.737458
ENSG00000031698	SARS	10750.4	1.16696	0.335047	3.48299	0.000495853	0.0103157
ENSG00000031823	RANBP3	5449.17	-0.0697167	0.301142	-0.231508	0.81692	0.931314
ENSG00000032219	ARID4A	2822.94	-1.18717	0.731865	-1.62211	0.104779	0.348711
ENSG00000032389	EIPR1	1594.8	-0.0545268	0.483674	-0.112735	0.910241	0.965809
ENSG00000032444	PNPLA6	5862.31	-0.403743	0.318524	-1.26755	0.20496	0.498331
ENSG00000032742	IFT88	431.218	-0.564888	0.596108	-0.947627	0.34332	0.642438
ENSG00000033011	ALG1	1932.64	0.375887	0.513484	0.732034	0.464148	0.73712
ENSG00000033030	ZCCHC8	2520.41	0.136164	0.287924	0.472916	0.636273	0.844904
ENSG00000033050	ABCF2	4797.87	1.99967	0.605527	3.30237	0.000958725	0.0161611
ENSG00000033100	CHPF2	3022.6	0.626873	0.284985	2.19967	0.0278303	0.160022
ENSG00000033122	LRRC7	99.4506	0.035825	0.642042	0.0557986	0.955502	0.98331
ENSG00000033170	FUT8	1821.77	0.0688155	0.439222	0.156676	0.8755	0.954587
ENSG00000033178	UBA6	2571.25	0.775987	0.635017	1.22199	0.22171	0.518739
ENSG00000033327	GAB2	518.345	0.254204	0.287354	0.884635	0.376353	0.668526
ENSG00000033627	ATP6V0A1	667.031	-0.415278	0.291601	-1.42413	0.15441	0.431467
ENSG00000033800	PIAS1	3143.53	-0.0110698	0.212343	-0.0521317	0.958424	0.984423
ENSG00000033867	SLC4A7	2663.03	-0.103262	0.446204	-0.231425	0.816985	0.931314
ENSG00000034053	APBA2	4934.83	-1.08754	0.517367	-2.10206	0.0355479	0.184766
ENSG00000034152	MAP2K3	5897.87	2.19268	0.583059	3.76066	0.000169469	0.0044751
ENSG00000034239	EFCAB1	8.63292	-1.22535	0.802796	-1.52635	0.126923	0.386071
ENSG00000034510	TMSB10	74381.5	0.394592	0.543623	0.725856	0.467927	0.739637
ENSG00000034533	ASTE1	982.137	-0.6582	0.22129	-2.97438	0.00293583	0.0361449
ENSG00000034677	RNF19A	4805.66	1.97001	0.562157	3.50438	0.000457671	0.00970175
ENSG00000034693	PEX3	780.166	0.155196	0.316361	0.490565	0.623734	0.838334
ENSG00000034713	GABARAPL2	3469.17	-0.533417	0.165821	-3.21683	0.00129613	0.0200725
ENSG00000035115	SH3YL1	2697.88	-0.519974	0.549832	-0.945696	0.344304	0.643455
ENSG00000035141	FAM136A	3226.82	-0.117934	0.506057	-0.233045	0.815726	0.930857
ENSG00000035403	VCL	946.881	0.677757	0.333176	2.03423	0.0419281	0.204218
ENSG00000035499	DEPDC1B	229.033	-0.399592	0.887106	-0.450444	0.65239	0.853043
ENSG00000035664	DAPK2	193.162	-1.05688	0.323248	-3.26956	0.00107715	0.0175056
ENSG00000035681	NSMAF	3059.01	0.379179	0.160149	2.36767	0.0179007	0.121131
ENSG00000035687	ADSS	3807.94	0.351859	0.423063	0.831694	0.405581	0.692409
ENSG00000035720	STAP1	373.935	1.39577	0.408341	3.41814	0.0006305	0.0122376
ENSG00000035862	TIMP2	496.502	-1.95112	0.403749	-4.83251	1.34823e-06	9.70211e-05
ENSG00000035928	RFC1	3863.1	0.643606	0.422101	1.52477	0.127317	0.386742
ENSG00000036054	TBC1D23	1563.63	-0.149716	0.541148	-0.276664	0.782038	0.915412
ENSG00000036257	CUL3	4322	0.138852	0.334799	0.414732	0.678338	0.868033
ENSG00000036448	MYOM2	197.756	-0.994782	0.309048	-3.21886	0.00128702	0.0200221
ENSG00000036530	CYP46A1	299.832	-0.744587	0.483589	-1.53971	0.123631	0.380431
ENSG00000036549	AC118549.1	2355.72	0.301422	0.448722	0.671734	0.501753	0.762041
ENSG00000036565	SLC18A1	2.1397	-1.03142	1.90898	-0.540297	0.588992	NA
ENSG00000036672	USP2	17.4825	-0.325102	0.871897	-0.372868	0.709247	0.882649
ENSG00000036828	CASR	95.5851	0.391239	0.376542	1.03903	0.298791	0.601683
ENSG00000037042	TUBG2	516.206	-0.75194	0.278808	-2.69699	0.00699701	0.0667455
ENSG00000037241	RPL26L1	1286.87	0.548789	0.547876	1.00167	0.316505	0.619464
ENSG00000037280	FLT4	309.644	-1.29554	0.406112	-3.19009	0.00142227	0.0213696
ENSG00000037474	NSUN2	6552.42	0.650829	0.292975	2.22145	0.0263206	0.154269
ENSG00000037637	FBXO42	1883.14	-0.0803186	0.164595	-0.487979	0.625565	0.838967
ENSG00000037749	MFAP3	519.843	0.564025	0.400214	1.40931	0.158744	0.437306
ENSG00000037757	MRI1	2507.73	-1.22232	0.284175	-4.30128	1.69817e-05	0.000741021
ENSG00000037897	METTL1	1144.78	2.76127	0.673212	4.10163	4.10248e-05	0.00150696
ENSG00000038002	AGA	1089.35	-0.0891117	0.171077	-0.520885	0.602447	0.824453
ENSG00000038210	PI4K2B	1908.12	0.270467	0.574197	0.471035	0.637616	0.845357
ENSG00000038219	BOD1L1	4392.22	-0.0626929	0.559955	-0.111961	0.910855	0.966145
ENSG00000038274	MAT2B	8984.97	0.00897311	0.229247	0.0391417	0.968777	0.988662
ENSG00000038295	TLL1	1.01711	-1.05935	2.73855	-0.38683	0.698882	NA
ENSG00000038358	EDC4	6593.06	0.280514	0.303952	0.922889	0.356065	0.65297
ENSG00000038382	TRIO	283.467	0.403213	0.372226	1.08325	0.278698	0.582224
ENSG00000038427	VCAN	25.0766	1.01713	0.713458	1.42563	0.153976	0.430821
ENSG00000038532	CLEC16A	2242.48	0.735084	0.375557	1.95731	0.0503106	0.228239
ENSG00000038945	MSR1	27.0719	0.0192822	0.423604	0.0455194	0.963693	0.986651
ENSG00000039068	CDH1	98.0883	1.0698	0.462505	2.31305	0.0207199	0.133012
ENSG00000039123	MTREX	3715.28	0.894723	0.50187	1.78278	0.0746224	0.287767
ENSG00000039139	DNAH5	2.94714	0.843062	1.36486	0.61769	0.536779	NA
ENSG00000039319	ZFYVE16	807.897	0.204586	0.623271	0.328246	0.742726	0.89948
ENSG00000039523	RIPOR1	1446.08	-0.0239932	0.296943	-0.0808007	0.9356	0.974636
ENSG00000039560	RAI14	47.436	0.802295	0.543335	1.47661	0.13978	0.408323
ENSG00000039600	SOX30	26.6033	1.35572	0.712304	1.90328	0.0570035	0.247166
ENSG00000039650	PNKP	2164.23	-0.057344	0.348908	-0.164353	0.869454	0.95266
ENSG00000039987	BEST2	24.7455	-0.193058	0.591608	-0.326327	0.744177	0.90022
ENSG00000040199	PHLPP2	763.656	0.615965	0.390911	1.57571	0.115092	0.365777
ENSG00000040275	SPDL1	849.809	0.258925	0.700527	0.369615	0.711669	0.884099
ENSG00000040341	STAU2	1025.09	-0.273691	0.29468	-0.928772	0.353007	0.650514
ENSG00000040487	PQLC2	348.033	-1.42172	0.38666	-3.67692	0.000236071	0.00580414
ENSG00000040531	CTNS	995.345	0.261833	0.391023	0.66961	0.503107	0.762865
ENSG00000040608	RTN4R	200.941	-2.33349	0.341597	-6.83113	8.42479e-12	2.92032e-09
ENSG00000040633	PHF23	2561.21	-0.000885264	0.388788	-0.00227698	0.998183	0.99973
ENSG00000040731	CDH10	1.79059	0.46018	1.79197	0.256802	0.797332	NA
ENSG00000040933	INPP4A	5104.97	-0.649808	0.271257	-2.39554	0.016596	0.116068
ENSG00000041353	RAB27B	223.76	1.47949	0.622079	2.37829	0.017393	0.119038
ENSG00000041357	PSMA4	7063.87	1.22351	0.513958	2.38057	0.0172859	0.118657
ENSG00000041515	MYO16	30.0007	0.457046	0.780196	0.585809	0.558004	0.798561
ENSG00000041802	LSG1	3087.27	0.799753	0.239341	3.34148	0.000833324	0.0147018
ENSG00000041880	PARP3	690.891	0.361735	0.408628	0.885244	0.376025	0.668088
ENSG00000041982	TNC	21.4406	1.08063	0.544386	1.98505	0.0471385	0.219222
ENSG00000041988	THAP3	1203.63	-0.569687	0.303345	-1.87801	0.0603793	0.255398
ENSG00000042062	RIPOR3	216.63	0.550439	0.431687	1.27509	0.202278	0.495054
ENSG00000042088	TDP1	2555.25	0.148816	0.440129	0.338119	0.735274	0.896277
ENSG00000042286	AIFM2	563.601	-0.821609	0.366873	-2.23949	0.0251241	0.150175
ENSG00000042304	C2orf83	12.4868	-0.700706	0.667032	-1.05048	0.293496	0.596665
ENSG00000042317	SPATA7	115.283	-1.01045	0.506243	-1.99597	0.045937	0.215426
ENSG00000042429	MED17	2551.55	0.295468	0.239735	1.23248	0.21777	0.513756
ENSG00000042445	RETSAT	1322.53	-0.591851	0.31277	-1.89229	0.0584525	0.250144
ENSG00000042493	CAPG	1413.63	-0.557195	0.370936	-1.50213	0.133063	0.397339
ENSG00000042753	AP2S1	2852.03	-0.126578	0.532425	-0.237739	0.812084	0.92946
ENSG00000042781	USH2A	1.64688	-3.61978	2.12391	-1.70429	0.0883261	NA
ENSG00000042832	TG	46.1288	-0.0595363	0.758625	-0.0784793	0.937447	0.975567
ENSG00000042980	ADAM28	149.871	0.164475	0.737585	0.222991	0.823542	0.933846
ENSG00000043039	BARX2	16.1373	-0.257219	0.902755	-0.284926	0.7757	0.913175
ENSG00000043093	DCUN1D1	1480.17	0.317812	0.486943	0.652667	0.513971	0.771019
ENSG00000043143	JADE2	9109.32	0.0194442	0.325271	0.0597783	0.952332	0.981731
ENSG00000043462	LCP2	16305.3	1.11979	0.284348	3.93811	8.21255e-05	0.002536
ENSG00000043514	TRIT1	877.803	0.541845	0.240519	2.25282	0.0242706	0.146577
ENSG00000043591	ADRB1	9.40611	-0.564533	0.664245	-0.849887	0.395388	0.684455
ENSG00000044090	CUL7	1271.02	-0.0602308	0.284355	-0.211815	0.832251	0.937246
ENSG00000044115	CTNNA1	1446.48	0.755433	0.535942	1.40954	0.158675	0.437306
ENSG00000044446	PHKA2	2075.08	-0.336143	0.237246	-1.41686	0.156525	0.434594
ENSG00000044459	CNTLN	59.92	1.43066	0.463216	3.08853	0.00201151	0.0274764
ENSG00000044574	HSPA5	29223.8	1.60043	0.379194	4.22063	2.43625e-05	0.000985599
ENSG00000046604	DSG2	62.0534	0.626342	0.403946	1.55056	0.121007	0.376546
ENSG00000046647	GEMIN8	652.283	0.338949	0.340471	0.99553	0.319479	0.622541
ENSG00000046651	OFD1	3150.27	-0.0741665	0.615624	-0.120474	0.904108	0.964239
ENSG00000046653	GPM6B	136.02	0.445522	0.700033	0.636429	0.524497	0.777754
ENSG00000046889	PREX2	14.6359	1.45581	0.690587	2.10808	0.0350237	0.183008
ENSG00000047056	WDR37	2814.21	-0.484543	0.270992	-1.78803	0.0737708	0.285692
ENSG00000047188	YTHDC2	2584.53	0.503459	0.518562	0.970875	0.33161	0.632117
ENSG00000047230	CTPS2	390.889	-0.745858	0.380637	-1.9595	0.0500544	0.227552
ENSG00000047249	ATP6V1H	1542.8	-0.180376	0.22301	-0.808826	0.418615	0.703822
ENSG00000047315	POLR2B	6450.83	0.17448	0.287031	0.607878	0.543268	0.789651
ENSG00000047346	FAM214A	2285.57	-1.51822	0.797748	-1.90314	0.0570229	0.247206
ENSG00000047365	ARAP2	2176.43	2.00269	0.607258	3.29793	0.00097401	0.0163627
ENSG00000047410	TPR	4851.71	0.651704	0.398265	1.63636	0.101765	0.343369
ENSG00000047457	CP	14.3771	-1.5599	0.82843	-1.88296	0.0597064	0.253701
ENSG00000047578	KIAA0556	663.99	0.429198	0.260045	1.65048	0.0988458	0.337593
ENSG00000047579	DTNBP1	1403.45	0.639062	0.300741	2.12496	0.0335903	0.17897
ENSG00000047597	XK	20.3634	-1.72937	0.953574	-1.81356	0.0697452	0.276855
ENSG00000047617	ANO2	2.26275	-2.54784	2.29962	-1.10794	0.267889	NA
ENSG00000047621	C12orf4	990.476	1.54441	0.565263	2.73219	0.00629142	0.062159
ENSG00000047634	SCML1	2776.57	-0.128729	0.587876	-0.218973	0.826671	0.935111
ENSG00000047644	WWC3	2313.23	0.773439	0.212155	3.64563	0.000266741	0.00637356
ENSG00000047648	ARHGAP6	26.9661	-1.31052	0.657888	-1.99201	0.0463695	0.216752
ENSG00000047662	FAM184B	123.743	-0.305492	0.475352	-0.642665	0.520441	0.774799
ENSG00000047849	MAP4	4991.17	0.35365	0.45289	0.780873	0.434877	0.717488
ENSG00000047932	GOPC	3089.31	0.00958915	0.487042	0.0196886	0.984292	0.994434
ENSG00000048028	USP28	697.787	-0.675179	0.419922	-1.60787	0.107865	0.353765
ENSG00000048052	HDAC9	84.6803	0.0881796	0.498164	0.177009	0.859501	0.947763
ENSG00000048140	TSPAN17	3670.63	0.0826016	0.638698	0.129328	0.897098	0.962193
ENSG00000048162	NOP16	3282.18	2.11679	0.704626	3.00413	0.00266344	0.0338134
ENSG00000048342	CC2D2A	41.4663	0.806416	0.645306	1.24966	0.211422	0.505716
ENSG00000048392	RRM2B	1190.01	-0.594471	0.559241	-1.063	0.287783	0.590407
ENSG00000048405	ZNF800	2464.95	0.159648	0.410164	0.389231	0.697105	0.87703
ENSG00000048462	TNFRSF17	44.0578	0.181504	0.793692	0.228683	0.819115	0.932219
ENSG00000048471	SNX29	1744.98	-0.572944	0.310046	-1.84793	0.0646122	0.265831
ENSG00000048540	LMO3	2.54783	-2.30276	1.69241	-1.36064	0.173627	NA
ENSG00000048544	MRPS10	2115.64	0.470179	0.309759	1.51789	0.129042	0.38958
ENSG00000048649	RSF1	4015.16	-0.280525	0.333193	-0.841929	0.399828	0.68831
ENSG00000048707	VPS13D	3350.62	-0.0119388	0.293325	-0.0407014	0.967534	0.988008
ENSG00000048740	CELF2	12246.6	0.0177264	0.207019	0.0856268	0.931763	0.973424
ENSG00000048828	FAM120A	8895.15	0.326423	0.349881	0.932954	0.350844	0.64878
ENSG00000048991	R3HDM1	1785.57	0.286543	0.347655	0.824215	0.409817	0.696452
ENSG00000049089	COL9A2	192.345	0.15022	0.610278	0.246151	0.805565	0.926005
ENSG00000049130	KITLG	2.32066	-0.729622	2.00826	-0.36331	0.716373	NA
ENSG00000049167	ERCC8	340.275	0.396199	0.352223	1.12485	0.260651	0.563435
ENSG00000049192	ADAMTS6	132.237	0.545735	0.608379	0.897031	0.369702	0.662385
ENSG00000049239	H6PD	3022.92	-0.109324	0.224082	-0.487876	0.625638	0.838967
ENSG00000049245	VAMP3	1769.49	-0.0823541	0.126657	-0.650216	0.515553	0.772121
ENSG00000049246	PER3	530.414	0.474984	0.227908	2.0841	0.0371509	0.189807
ENSG00000049247	UTS2	79.3405	-0.4117	0.851368	-0.483575	0.628688	0.840435
ENSG00000049249	TNFRSF9	1723.52	5.75506	0.961091	5.98805	2.12375e-09	4.02058e-07
ENSG00000049283	EPN3	5.35922	-0.61467	1.32624	-0.463467	0.643029	NA
ENSG00000049323	LTBP1	33.667	0.443717	0.692731	0.640533	0.521826	0.775664
ENSG00000049449	RCN1	1565.41	2.1708	0.532638	4.07557	4.59016e-05	0.00162377
ENSG00000049540	ELN	60.1644	-0.0821369	0.440773	-0.186347	0.852172	0.945019
ENSG00000049541	RFC2	2092.43	0.511123	0.609004	0.839278	0.401314	0.689437
ENSG00000049618	ARID1B	4704.51	-0.0496923	0.160913	-0.308814	0.757463	0.906062
ENSG00000049656	CLPTM1L	6145.97	0.538507	0.314356	1.71305	0.0867034	0.314775
ENSG00000049759	NEDD4L	221.543	1.06839	0.488081	2.18896	0.0285998	0.162782
ENSG00000049768	FOXP3	4052.26	0.135488	0.695009	0.194944	0.845437	0.942532
ENSG00000049769	PPP1R3F	1028.3	-0.799033	0.442403	-1.80612	0.0708991	0.279139
ENSG00000049860	HEXB	2255.41	-0.618702	0.188631	-3.27996	0.00103821	0.0170798
ENSG00000049883	PTCD2	701.418	-0.369886	0.41793	-0.885041	0.376134	0.668234
ENSG00000050030	NEXMIF	67.2873	-1.15437	0.69134	-1.66976	0.0949662	0.330313
ENSG00000050130	JKAMP	1261.73	-0.762309	0.460832	-1.6542	0.098087	0.336355
ENSG00000050165	DKK3	16.2887	-2.36438	1.13867	-2.07644	0.037853	0.191569
ENSG00000050327	ARHGEF5	395.091	-0.00897455	0.483342	-0.0185677	0.985186	0.994725
ENSG00000050344	NFE2L3	1449.02	1.55065	0.521032	2.97611	0.00291934	0.0360321
ENSG00000050393	MCUR1	1794.34	0.387536	0.488146	0.793894	0.427257	0.711628
ENSG00000050405	LIMA1	981.264	0.726837	0.412245	1.76312	0.0778803	0.295424
ENSG00000050426	LETMD1	4071.08	-0.443895	0.251121	-1.76765	0.0771189	0.293852
ENSG00000050438	SLC4A8	187.012	0.264664	0.40021	0.661312	0.508412	0.766982
ENSG00000050555	LAMC3	155.785	-1.60568	0.570632	-2.81387	0.00489496	0.0521966
ENSG00000050628	PTGER3	141.249	4.08502	0.903982	4.51891	6.21576e-06	0.000331117
ENSG00000050730	TNIP3	614.549	5.0545	1.17763	4.2921	1.76991e-05	0.000764199
ENSG00000050748	MAPK9	2301.03	0.0573958	0.322965	0.177715	0.858947	0.947579
ENSG00000050767	COL23A1	8.0784	-0.849398	0.78841	-1.07736	0.281321	0.584418
ENSG00000050820	BCAR1	15.405	-0.288164	0.928019	-0.310515	0.756169	0.905485
ENSG00000051009	FAM160A2	2062.3	-0.0928046	0.31774	-0.292078	0.770227	0.911329
ENSG00000051108	HERPUD1	5274.4	1.68335	0.306964	5.48388	4.16099e-08	5.08299e-06
ENSG00000051128	HOMER3	43.4347	-0.640262	0.436372	-1.46724	0.142311	0.412192
ENSG00000051180	RAD51	1149.16	1.82506	1.14397	1.59537	0.110629	0.358343
ENSG00000051341	POLQ	243.697	0.150932	0.932107	0.161926	0.871364	0.953541
ENSG00000051382	PIK3CB	1607.08	-0.523588	0.321252	-1.62984	0.103135	0.34619
ENSG00000051523	CYBA	14669.5	-0.675101	0.465481	-1.45033	0.146967	0.419691
ENSG00000051596	THOC3	2774.17	-0.555088	0.430001	-1.2909	0.196738	0.487654
ENSG00000051620	HEBP2	2259.08	-0.573455	0.227355	-2.52229	0.0116593	0.0932859
ENSG00000051825	MPHOSPH9	1821.15	0.479673	0.445753	1.0761	0.281884	0.584818
ENSG00000052126	PLEKHA5	267.435	-0.594759	0.354192	-1.6792	0.0931125	0.326857
ENSG00000052344	PRSS8	30.3547	-0.838231	0.511515	-1.63872	0.101271	0.342406
ENSG00000052723	SIKE1	2930.47	0.411658	0.226961	1.81378	0.0697115	0.276822
ENSG00000052749	RRP12	3477.01	2.55679	0.622824	4.10516	4.0404e-05	0.00149083
ENSG00000052795	FNIP2	736.491	0.136227	0.372885	0.365332	0.714863	0.885297
ENSG00000052802	MSMO1	1602.85	0.965226	0.389014	2.48121	0.0130937	0.0997672
ENSG00000052841	TTC17	2943.47	0.00382441	0.393191	0.00972659	0.992239	0.997288
ENSG00000052850	ALX4	2.05751	-1.79736	1.66329	-1.08061	0.279871	NA
ENSG00000053108	FSTL4	12.104	-0.539186	0.928007	-0.581014	0.561231	0.800582
ENSG00000053254	FOXN3	5397.96	0.696177	0.268091	2.59679	0.00940993	0.0809748
ENSG00000053328	METTL24	1.64255	-1.83691	2.26599	-0.810645	0.417569	NA
ENSG00000053371	AKR7A2	2313.32	-1.52793	0.431311	-3.54253	0.000396314	0.00876342
ENSG00000053372	MRTO4	5277.94	2.00232	0.684102	2.92693	0.00342323	0.0405239
ENSG00000053438	NNAT	58.4347	0.391318	0.494978	0.790576	0.429191	0.713222
ENSG00000053501	USE1	2328.74	-0.0601438	0.413068	-0.145603	0.884235	0.956908
ENSG00000053524	MCF2L2	173.048	0.0113662	0.344163	0.0330256	0.973654	0.990354
ENSG00000053702	NRIP2	333.481	-0.176056	0.382743	-0.459985	0.645527	0.84921
ENSG00000053747	LAMA3	5.75108	0.286785	1.04717	0.273866	0.784188	NA
ENSG00000053770	AP5M1	2157.9	0.35223	0.423469	0.831772	0.405538	0.692409
ENSG00000053900	ANAPC4	2109.23	-0.200623	0.348175	-0.576213	0.564471	0.802816
ENSG00000053918	KCNQ1	1435.29	-1.45279	0.41628	-3.48994	0.000483134	0.0101195
ENSG00000054116	TRAPPC3	2934.97	-0.0530046	0.246553	-0.214983	0.829781	0.936315
ENSG00000054118	THRAP3	9489.94	0.472338	0.333219	1.4175	0.156337	0.434169
ENSG00000054148	PHPT1	2165.61	1.13642	0.584143	1.94545	0.0517205	0.232569
ENSG00000054179	ENTPD2	11.9376	5.0571	1.51202	3.34461	0.000823988	0.0146209
ENSG00000054219	LY75	3028.53	0.372055	0.235255	1.5815	0.113764	0.363537
ENSG00000054267	ARID4B	6195.37	0.388899	0.501658	0.775228	0.438205	0.719923
ENSG00000054277	OPN3	721.284	-0.640675	0.348982	-1.83584	0.0663813	0.269723
ENSG00000054282	SDCCAG8	813.092	-0.915974	0.36327	-2.52147	0.0116866	0.0934128
ENSG00000054356	PTPRN	11.4349	-0.111177	1.38858	-0.0800655	0.936185	0.974845
ENSG00000054392	HHAT	96.9261	-0.331241	0.312228	-1.06089	0.288738	0.591439
ENSG00000054523	KIF1B	940.577	-0.165793	0.297745	-0.556829	0.577644	0.8113
ENSG00000054598	FOXC1	7.42238	0.379257	0.920172	0.412159	0.680223	0.869131
ENSG00000054611	TBC1D22A	3099.24	-0.66126	0.317024	-2.08584	0.0369932	0.189625
ENSG00000054654	SYNE2	3899.75	0.483632	0.494785	0.977459	0.328342	0.629912
ENSG00000054690	PLEKHH1	42.5442	0.530347	0.642588	0.82533	0.409185	0.695809
ENSG00000054793	ATP9A	62.3067	0.697133	0.57397	1.21458	0.224526	0.521945
ENSG00000054965	FAM168A	1903.76	-0.238691	0.306399	-0.779021	0.435968	0.718179
ENSG00000054967	RELT	1421.9	0.735742	0.572385	1.2854	0.198654	0.490568
ENSG00000054983	GALC	1047.25	0.0996101	0.191596	0.519898	0.603135	0.824857
ENSG00000055044	NOP58	7755.83	1.30859	0.538919	2.42818	0.015175	0.109846
ENSG00000055070	SZRD1	11368.2	1.29173	0.551464	2.34237	0.0191615	0.126804
ENSG00000055118	KCNH2	192.684	-1.55193	0.57928	-2.67906	0.00738283	0.0689821
ENSG00000055130	CUL1	4839.72	0.359757	0.252396	1.42537	0.154051	0.430982
ENSG00000055147	FAM114A2	1078.42	0.0969441	0.362874	0.267156	0.789349	0.918471
ENSG00000055163	CYFIP2	17166.7	-0.644008	0.341954	-1.88331	0.0596577	0.253581
ENSG00000055208	TAB2	8203.97	0.327241	0.34215	0.956425	0.338857	0.638953
ENSG00000055211	GINM1	1102.13	0.0437529	0.218588	0.200161	0.841354	0.940737
ENSG00000055332	EIF2AK2	3066.3	1.02957	0.598107	1.72138	0.0851821	0.311457
ENSG00000055483	USP36	6155.49	0.799344	0.242875	3.29118	0.000997685	0.0166694
ENSG00000055609	KMT2C	4168.4	-0.0429179	0.422207	-0.101651	0.919034	0.969184
ENSG00000055732	MCOLN3	104.411	-0.180451	0.562128	-0.321015	0.748199	0.901708
ENSG00000055917	PUM2	9827.4	0.104684	0.405683	0.258045	0.796373	0.922114
ENSG00000055950	MRPL43	2779.65	-0.354687	0.271894	-1.3045	0.192063	0.48135
ENSG00000055955	ITIH4	449.093	-0.478637	0.562468	-0.850959	0.394792	0.684009
ENSG00000055957	ITIH1	9.40682	-1.00391	0.792685	-1.26647	0.205345	0.498873
ENSG00000056050	HPF1	759.837	0.200523	0.373423	0.536986	0.591277	0.818225
ENSG00000056097	ZFR	4816	0.294432	0.326004	0.903155	0.366443	0.659911
ENSG00000056277	ZNF280C	248.825	0.488775	0.500226	0.977109	0.328515	0.629952
ENSG00000056291	NPFFR2	1.14968	1.63679	2.23873	0.731123	0.464704	NA
ENSG00000056558	TRAF1	15178.3	1.98307	0.571101	3.47236	0.000515899	0.0106072
ENSG00000056586	RC3H2	3038.72	0.886762	0.269518	3.29018	0.00100123	0.0166834
ENSG00000056736	IL17RB	207.546	-0.247981	0.228582	-1.08487	0.277981	0.581899
ENSG00000056972	TRAF3IP2	893.051	-0.913	0.257766	-3.54198	0.000397142	0.00877098
ENSG00000056998	GYG2	5.58502	-1.31988	0.852742	-1.54781	0.121668	NA
ENSG00000057019	DCBLD2	216.737	-0.455228	0.373361	-1.21927	0.222743	0.520156
ENSG00000057252	SOAT1	3722.75	1.33513	0.365832	3.64958	0.000262673	0.00630697
ENSG00000057294	PKP2	71.3193	-0.611861	0.340814	-1.79529	0.072607	0.283101
ENSG00000057468	MSH4	12.332	0.430544	0.783418	0.549571	0.582613	0.813516
ENSG00000057593	F7	4.24715	0.119472	1.35052	0.0884633	0.929508	NA
ENSG00000057608	GDI2	14136.8	0.453974	0.308363	1.47221	0.140965	0.410059
ENSG00000057657	PRDM1	1455.79	2.69222	0.710596	3.78868	0.000151447	0.00410918
ENSG00000057663	ATG5	1846.5	0.495796	0.452687	1.09523	0.273416	0.576855
ENSG00000057704	TMCC3	72.7676	-0.818038	0.606537	-1.3487	0.177432	0.460875
ENSG00000057757	PITHD1	4498.91	-0.0185933	0.217085	-0.08565	0.931745	0.973424
ENSG00000057935	MTA3	1615.55	-0.0944648	0.244214	-0.386811	0.698896	0.878404
ENSG00000058056	USP13	546.031	-0.547271	0.456546	-1.19872	0.230637	0.529496
ENSG00000058063	ATP11B	4485.91	0.0571978	0.440041	0.129983	0.89658	0.962098
ENSG00000058085	LAMC2	7.08896	-0.312984	0.798151	-0.392136	0.694957	0.875959
ENSG00000058091	CDK14	46.0106	0.441501	0.4895	0.901944	0.367087	0.660168
ENSG00000058262	SEC61A1	13414.8	0.700077	0.296908	2.35789	0.018379	0.123317
ENSG00000058272	PPP1R12A	4865.61	-0.111391	0.501743	-0.222007	0.824308	0.934327
ENSG00000058335	RASGRF1	20.9546	0.273523	0.602418	0.454042	0.649798	0.85169
ENSG00000058404	CAMK2B	41.6999	0.635383	0.965724	0.657934	0.510581	0.768604
ENSG00000058453	CROCC	3247.2	-0.558052	0.298583	-1.869	0.0616223	0.258142
ENSG00000058600	POLR3E	4539.07	0.612462	0.298373	2.05268	0.0401041	0.19896
ENSG00000058668	ATP2B4	3092.09	-1.12322	0.3447	-3.25854	0.00111985	0.01799
ENSG00000058673	ZC3H11A	8868.52	0.0821593	0.418448	0.196343	0.844342	0.941895
ENSG00000058729	RIOK2	1541.12	0.826742	0.443114	1.86575	0.0620759	0.259336
ENSG00000058799	YIPF1	946.862	-0.0361921	0.303841	-0.119115	0.905184	0.964488
ENSG00000058804	NDC1	2120.99	0.713253	0.475845	1.49892	0.133894	0.398749
ENSG00000058866	DGKG	15.7061	-0.0560299	0.891965	-0.0628162	0.949913	0.980757
ENSG00000059122	FLYWCH1	4505.79	-0.706673	0.331381	-2.13251	0.0329648	0.176823
ENSG00000059145	UNKL	2435.62	-0.743955	0.298316	-2.49385	0.0126365	0.0979001
ENSG00000059377	TBXAS1	293.97	0.256775	0.302207	0.849666	0.395511	0.684513
ENSG00000059378	PARP12	3693.36	1.16	0.238573	4.86224	1.16062e-06	8.5875e-05
ENSG00000059573	ALDH18A1	4189.02	1.22305	0.578725	2.11335	0.0345708	0.181606
ENSG00000059588	TARBP1	3180.44	0.103762	0.33051	0.313945	0.753563	0.903975
ENSG00000059691	GATB	854.019	-0.146179	0.396641	-0.368542	0.712469	0.884378
ENSG00000059728	MXD1	1124.01	-0.187744	0.431839	-0.434754	0.663741	0.860402
ENSG00000059758	CDK17	3575.25	0.8694	0.327217	2.65696	0.00788499	0.0723556
ENSG00000059769	DNAJC25	412.803	0.690947	0.42067	1.64249	0.100488	0.340901
ENSG00000059804	SLC2A3	6719.61	1.3691	0.316032	4.33216	1.47653e-05	0.000660708
ENSG00000059915	PSD	1177.33	-0.711558	0.389894	-1.82501	0.0680002	0.273215
ENSG00000060069	CTDP1	3326.54	0.0953053	0.270299	0.352593	0.724394	0.88949
ENSG00000060138	YBX3	2665.25	2.47431	0.67671	3.65639	0.000255793	0.00618402
ENSG00000060140	STYK1	21.7217	-0.239483	0.744593	-0.32163	0.747733	0.901684
ENSG00000060237	WNK1	7689.31	0.261197	0.342913	0.761702	0.446238	0.725891
ENSG00000060339	CCAR1	5656.92	-0.279366	0.454333	-0.614893	0.538625	0.786526
ENSG00000060491	OGFR	9163.05	0.809128	0.396893	2.03866	0.0414844	0.203179
ENSG00000060558	GNA15	902.129	2.00757	0.600735	3.34185	0.000832217	0.0147018
ENSG00000060566	CREB3L3	3.83743	-1.94099	2.43983	-0.795543	0.426298	NA
ENSG00000060642	PIGV	775.548	-0.156536	0.264583	-0.591631	0.554098	0.796548
ENSG00000060656	PTPRU	8.04996	-1.25275	1.37798	-0.909119	0.363287	0.657871
ENSG00000060688	SNRNP40	3881.43	0.398473	0.316898	1.25742	0.208603	0.50283
ENSG00000060749	QSER1	858.869	0.0521463	0.435665	0.119694	0.904726	0.964239
ENSG00000060762	MPC1	1306.54	-0.662914	0.226557	-2.92603	0.00343315	0.0406022
ENSG00000060971	ACAA1	3591.8	-0.569822	0.299729	-1.90112	0.0572859	0.247866
ENSG00000060982	BCAT1	438.565	1.24419	0.556329	2.23643	0.0253239	0.150847
ENSG00000061273	HDAC7	13463.9	0.262051	0.262821	0.997071	0.31873	0.621719
ENSG00000061337	LZTS1	105.934	0.660293	0.419325	1.57466	0.115335	0.366119
ENSG00000061455	PRDM6	11.3491	-0.569821	0.691175	-0.824423	0.409699	0.696347
ENSG00000061492	WNT8A	1.57447	2.60466	3.11557	0.836014	0.403147	NA
ENSG00000061656	SPAG4	57.3251	0.852974	0.70381	1.21194	0.225536	0.523105
ENSG00000061676	NCKAP1	271.885	-0.348527	0.672676	-0.51812	0.604375	0.825523
ENSG00000061794	MRPS35	2646.6	0.849637	0.377906	2.24828	0.0245584	0.147777
ENSG00000061918	GUCY1B1	71.9431	1.24101	0.360791	3.43969	0.000582381	0.0115589
ENSG00000061936	SFSWAP	5005.83	-0.0386714	0.160791	-0.240507	0.809937	0.928375
ENSG00000061938	TNK2	7475.2	-0.461875	0.271729	-1.69976	0.0891753	0.319514
ENSG00000061987	MON2	2824.89	0.0615234	0.563074	0.109263	0.912994	0.967104
ENSG00000062038	CDH3	62.4949	-0.617921	0.680152	-0.908504	0.363612	0.658053
ENSG00000062096	ARSF	5.23807	0.328038	1.0217	0.321069	0.748158	NA
ENSG00000062194	GPBP1	6505.48	0.484558	0.449671	1.07758	0.28122	0.5844
ENSG00000062282	DGAT2	142.576	1.22529	0.755913	1.62094	0.105031	0.349362
ENSG00000062370	ZNF112	13.9086	-1.00414	0.843271	-1.19077	0.233745	0.53294
ENSG00000062485	CS	9707.49	0.679932	0.447501	1.5194	0.128662	0.389005
ENSG00000062524	LTK	69.7571	-1.14678	0.771289	-1.48684	0.137058	0.403862
ENSG00000062582	MRPS24	3971.73	0.0817285	0.421832	0.193747	0.846374	0.942813
ENSG00000062598	ELMO2	2608.08	0.188491	0.203519	0.926159	0.354363	0.651462
ENSG00000062650	WAPL	4452.81	0.16791	0.334625	0.501785	0.615819	0.833103
ENSG00000062716	VMP1	5963.73	1.73149	0.385456	4.49206	7.05385e-06	0.000367802
ENSG00000062725	APPBP2	2182.97	-0.224465	0.25813	-0.869582	0.384529	0.676168
ENSG00000062822	POLD1	4343.56	-0.086247	0.586059	-0.147164	0.883002	0.956793
ENSG00000063015	SEZ6	27.3472	-1.09508	0.691188	-1.58435	0.113115	0.362458
ENSG00000063046	EIF4B	46019	-0.252999	0.179803	-1.40709	0.159401	0.43818
ENSG00000063127	SLC6A16	145.899	-0.49004	0.362397	-1.35222	0.176306	0.459549
ENSG00000063169	BICRA	2051.43	-0.275186	0.282721	-0.973351	0.330379	0.631313
ENSG00000063176	SPHK2	1488.89	-0.271144	0.377935	-0.717435	0.473106	0.742861
ENSG00000063177	RPL18	111859	-0.542457	0.386462	-1.40365	0.160424	0.439316
ENSG00000063180	CA11	667.005	-0.645542	0.326753	-1.97563	0.0481971	0.222464
ENSG00000063241	ISOC2	1512.18	0.90852	0.610093	1.48915	0.136448	0.4027
ENSG00000063244	U2AF2	16275.9	0.425017	0.437683	0.971061	0.331518	0.632087
ENSG00000063245	EPN1	3988.07	-0.0924566	0.373772	-0.247361	0.804629	0.925564
ENSG00000063322	MED29	2917.54	0.0697208	0.312	0.223464	0.823174	0.933732
ENSG00000063438	AHRR	956.599	-0.340177	0.625119	-0.54418	0.586318	0.81554
ENSG00000063587	ZNF275	2378.29	0.675127	0.248816	2.71335	0.00666057	0.0645415
ENSG00000063601	MTMR1	3379.77	0.703403	0.337667	2.08312	0.03724	0.18982
ENSG00000063660	GPC1	264.745	-0.277	0.711637	-0.389244	0.697096	0.87703
ENSG00000063761	ADCK1	482.208	0.241853	0.432413	0.55931	0.57595	0.810528
ENSG00000063854	HAGH	2772.51	-0.62941	0.263121	-2.39209	0.0167526	0.1166
ENSG00000063978	RNF4	6654.28	0.242733	0.253662	0.956912	0.338611	0.638672
ENSG00000064012	CASP8	4548.45	-0.5853	0.41962	-1.39483	0.163067	0.442522
ENSG00000064042	LIMCH1	20.4567	1.00195	0.939821	1.0661	0.286377	0.588941
ENSG00000064102	INTS13	1880.22	0.210311	0.432125	0.48669	0.626478	0.839383
ENSG00000064115	TM7SF3	1424.67	-0.464289	0.283823	-1.63584	0.101873	0.343639
ENSG00000064195	DLX3	3.35667	-1.60523	1.81003	-0.886855	0.375157	NA
ENSG00000064199	SPA17	101.135	-0.753998	0.712489	-1.05826	0.289938	0.59281
ENSG00000064201	TSPAN32	1069.9	-1.48325	0.61133	-2.42627	0.0152549	0.110099
ENSG00000064205	WISP2	25.26	1.11694	0.501897	2.22545	0.0260514	0.153239
ENSG00000064225	ST3GAL6	80.8353	-1.38208	0.733268	-1.88483	0.0594529	0.253017
ENSG00000064270	ATP2C2	19.2442	-1.121	0.767763	-1.46008	0.144267	0.415026
ENSG00000064300	NGFR	14.4799	0.381622	0.806244	0.473334	0.635975	0.84482
ENSG00000064309	CDON	166.007	-0.416556	0.35427	-1.17582	0.239669	0.539576
ENSG00000064313	TAF2	1848.9	0.622629	0.492194	1.26501	0.205869	0.499521
ENSG00000064393	HIPK2	3179.65	0.192609	0.214769	0.896819	0.369816	0.662396
ENSG00000064419	TNPO3	3778.87	0.300588	0.33701	0.891925	0.372433	0.664729
ENSG00000064489	BORCS8-MEF2B	490.244	0.00777436	0.371785	0.0209109	0.983317	0.994061
ENSG00000064490	RFXANK	2729.55	-0.486673	0.437263	-1.113	0.265709	0.568728
ENSG00000064545	TMEM161A	1637.96	-0.0331652	0.397326	-0.083471	0.933477	0.974142
ENSG00000064547	LPAR2	2611.35	-0.72418	0.288274	-2.51212	0.0120008	0.0946894
ENSG00000064601	CTSA	4154.98	0.120379	0.42428	0.283726	0.77662	0.913719
ENSG00000064607	SUGP2	5053.51	-0.45358	0.184019	-2.46485	0.0137071	0.102787
ENSG00000064651	SLC12A2	879.961	0.78227	0.443546	1.76367	0.0777868	0.295297
ENSG00000064652	SNX24	67.8995	-0.493023	0.477713	-1.03205	0.302049	0.604809
ENSG00000064655	EYA2	1.42647	-0.354258	3.54639	-0.0998926	0.92043	NA
ENSG00000064666	CNN2	14303.8	-0.801217	0.37826	-2.11817	0.0341611	0.180493
ENSG00000064687	ABCA7	5623.7	-1.34636	0.657935	-2.04635	0.0407222	0.200724
ENSG00000064692	SNCAIP	9.11544	-0.83094	1.1353	-0.73191	0.464223	0.737164
ENSG00000064703	DDX20	1746.24	0.351453	0.282008	1.24625	0.212671	0.507421
ENSG00000064726	BTBD1	3236.99	0.546988	0.419767	1.30308	0.192549	0.482151
ENSG00000064763	FAR2	319.558	0.332193	0.427713	0.776674	0.437351	0.719192
ENSG00000064787	BCAS1	18.4295	-0.180271	0.726868	-0.248011	0.804126	0.925561
ENSG00000064835	POU1F1	4.38411	-0.993504	1.44167	-0.689135	0.490738	NA
ENSG00000064886	CHI3L2	1192.72	-1.00044	0.523343	-1.91164	0.0559228	0.244071
ENSG00000064932	SBNO2	11672.2	2.27394	0.432682	5.25545	1.47664e-07	1.50172e-05
ENSG00000064933	PMS1	1053.43	-0.369542	0.482359	-0.766114	0.443608	0.724118
ENSG00000064961	HMG20B	3385.85	-0.532161	0.36351	-1.46395	0.143207	0.413629
ENSG00000064989	CALCRL	74.7825	-0.224658	0.46718	-0.480882	0.630601	0.841405
ENSG00000064995	TAF11	2249.14	-0.178167	0.174987	-1.01817	0.308597	0.611357
ENSG00000064999	ANKS1A	1073.07	0.181462	0.182345	0.995156	0.31966	0.622649
ENSG00000065000	AP3D1	7895.2	0.353239	0.259378	1.36187	0.173239	0.455144
ENSG00000065029	ZNF76	2929.4	-0.0669052	0.25201	-0.265487	0.790634	0.91926
ENSG00000065054	SLC9A3R2	188.618	-1.56782	0.359478	-4.36138	1.29245e-05	0.000599031
ENSG00000065057	NTHL1	717.803	-1.24608	0.514854	-2.42026	0.0155095	0.111179
ENSG00000065060	UHRF1BP1	1011.3	0.512366	0.323007	1.58624	0.112685	0.361531
ENSG00000065135	GNAI3	4280.6	0.416613	0.450477	0.924826	0.355056	0.651972
ENSG00000065150	IPO5	8445.64	0.618351	0.421529	1.46692	0.142397	0.412297
ENSG00000065154	OAT	2163.93	-0.0320183	0.220431	-0.145254	0.884511	0.957119
ENSG00000065183	WDR3	3380.95	1.73845	0.539647	3.22145	0.00127542	0.0198666
ENSG00000065243	PKN2	1594.65	0.271182	0.504445	0.537584	0.590864	0.817918
ENSG00000065268	WDR18	3629.43	0.370142	0.548969	0.674248	0.500154	0.761245
ENSG00000065308	TRAM2	719.051	-1.19609	0.345254	-3.46438	0.000531454	0.0108455
ENSG00000065320	NTN1	50.2639	2.33938	0.561825	4.16389	3.12866e-05	0.00121259
ENSG00000065328	MCM10	1187.04	0.736931	1.21619	0.605935	0.544558	0.790686
ENSG00000065357	DGKA	18324.3	-0.615432	0.306236	-2.00967	0.0444663	0.211389
ENSG00000065361	ERBB3	165.307	-0.713811	0.594809	-1.20007	0.230113	0.529134
ENSG00000065371	ROPN1	2.54452	-2.01433	1.79321	-1.12331	0.261306	NA
ENSG00000065413	ANKRD44	7944.48	0.900543	0.272089	3.30974	0.000933833	0.015861
ENSG00000065427	KARS	12278.9	1.05897	0.47263	2.24058	0.025053	0.149983
ENSG00000065457	ADAT1	912.434	0.00541718	0.26471	0.0204646	0.983673	0.994129
ENSG00000065485	PDIA5	578.667	1.98072	0.570082	3.47445	0.000511909	0.0105339
ENSG00000065491	TBC1D22B	1031.62	0.385068	0.294988	1.30537	0.191768	0.480758
ENSG00000065518	NDUFB4	4168.27	0.0475596	0.312984	0.151955	0.879222	0.955764
ENSG00000065526	SPEN	4955.84	0.646984	0.271115	2.38639	0.0170148	0.117859
ENSG00000065534	MYLK	168.658	1.02995	0.426549	2.41462	0.0157517	0.112237
ENSG00000065548	ZC3H15	4699.13	0.720087	0.480862	1.49749	0.134265	0.399469
ENSG00000065559	MAP2K4	1825.2	0.736333	0.31863	2.31093	0.0208366	0.13344
ENSG00000065600	TMEM206	552.047	-0.242352	0.262639	-0.922757	0.356134	0.65297
ENSG00000065613	SLK	2496.81	0.405365	0.612115	0.662238	0.507819	0.766603
ENSG00000065615	CYB5R4	1548	0.668791	0.558034	1.19848	0.230731	0.529615
ENSG00000065618	COL17A1	3.4211	0.977324	1.65415	0.59083	0.554634	NA
ENSG00000065621	GSTO2	189.139	-0.419868	0.384081	-1.09318	0.274316	0.577865
ENSG00000065665	SEC61A2	633.212	0.105657	0.305426	0.345935	0.729392	0.892555
ENSG00000065675	PRKCQ	3690.35	-0.289349	0.18535	-1.5611	0.118501	0.372136
ENSG00000065717	TLE2	1365.96	-0.94156	0.345535	-2.72493	0.00643152	0.0629729
ENSG00000065802	ASB1	2949.82	-0.12048	0.397484	-0.303107	0.761808	0.907305
ENSG00000065809	FAM107B	10613.1	0.340232	0.322295	1.05565	0.291126	0.594204
ENSG00000065833	ME1	30.9238	0.460166	0.513716	0.89576	0.370381	0.662797
ENSG00000065882	TBC1D1	3419.56	0.794479	0.410638	1.93474	0.0530219	0.2361
ENSG00000065883	CDK13	5089.83	-0.0530069	0.21055	-0.251754	0.801231	0.924088
ENSG00000065911	MTHFD2	11337.3	3.88451	0.458564	8.47104	2.43208e-17	2.49399e-14
ENSG00000065923	SLC9A7	943.365	0.189782	0.477589	0.397375	0.691091	0.873583
ENSG00000065970	FOXJ2	2248.39	-0.55125	0.288564	-1.91032	0.0560915	0.24446
ENSG00000065978	YBX1	46095.9	0.789626	0.532856	1.48188	0.138373	0.406046
ENSG00000065989	PDE4A	358.222	0.181102	0.455201	0.397851	0.69074	0.873498
ENSG00000066027	PPP2R5A	3340.82	-0.21371	0.227762	-0.938305	0.348088	0.646184
ENSG00000066032	CTNNA2	9.40749	0.805082	1.42279	0.565847	0.571498	0.807552
ENSG00000066044	ELAVL1	7171.13	0.586154	0.433648	1.35168	0.176477	0.459704
ENSG00000066056	TIE1	56.9335	-0.432287	0.471339	-0.917147	0.359066	0.654445
ENSG00000066084	DIP2B	2791.73	0.0700803	0.231703	0.302458	0.762303	0.907436
ENSG00000066117	SMARCD1	3945.9	0.472679	0.368385	1.28311	0.199453	0.49156
ENSG00000066135	KDM4A	1785.72	0.084702	0.224703	0.37695	0.706211	0.881323
ENSG00000066136	NFYC	3368.67	0.288145	0.295136	0.976313	0.328909	0.630239
ENSG00000066185	ZMYND12	26.6298	-0.870334	0.648733	-1.34159	0.179729	0.46361
ENSG00000066230	SLC9A3	637.136	0.0220694	0.293784	0.0751213	0.940118	0.97675
ENSG00000066248	NGEF	3.25412	-0.943617	1.33075	-0.709084	0.478272	NA
ENSG00000066279	ASPM	251.871	0.84901	1.22485	0.693156	0.488212	0.753842
ENSG00000066294	CD84	2458.39	0.824312	0.297883	2.76723	0.0056535	0.0576142
ENSG00000066322	ELOVL1	2750.83	-0.337051	0.463534	-0.727133	0.467145	0.738926
ENSG00000066336	SPI1	488.78	-0.753938	0.55649	-1.35481	0.175478	0.458638
ENSG00000066379	ZNRD1	2428.35	0.419831	0.387067	1.08465	0.278078	0.581953
ENSG00000066382	MPPED2	53.3216	-1.23142	0.532971	-2.31049	0.0208612	0.133563
ENSG00000066405	CLDN18	4.31843	-0.47546	0.847456	-0.561044	0.574767	NA
ENSG00000066422	ZBTB11	3202.89	0.428208	0.44656	0.958903	0.337608	0.637647
ENSG00000066427	ATXN3	1721.86	-0.168265	0.369522	-0.455358	0.648852	0.851203
ENSG00000066455	GOLGA5	1316.93	-0.197188	0.446448	-0.441681	0.65872	0.857505
ENSG00000066468	FGFR2	73.3178	-1.09716	0.771618	-1.4219	0.155055	0.432268
ENSG00000066557	LRRC40	1095.66	0.152443	0.585623	0.260309	0.794625	0.921132
ENSG00000066583	ISOC1	1368	0.483673	0.315791	1.53162	0.125615	0.383611
ENSG00000066629	EML1	56.7902	0.0183324	0.487626	0.0375951	0.970011	0.988963
ENSG00000066651	TRMT11	944.755	0.162142	0.434284	0.373354	0.708885	0.882426
ENSG00000066654	THUMPD1	4583.4	0.157812	0.495598	0.318427	0.750161	0.902555
ENSG00000066697	MSANTD3	625.168	-0.758441	0.301389	-2.51648	0.0118533	0.0943166
ENSG00000066735	KIF26A	21.5212	-1.89028	0.670497	-2.81922	0.00481405	0.0514819
ENSG00000066739	ATG2B	2546.3	0.623379	0.519316	1.20038	0.22999	0.529049
ENSG00000066777	ARFGEF1	3665.01	-0.296608	0.447472	-0.662852	0.507425	0.766385
ENSG00000066813	ACSM2B	52.7932	-0.304031	0.499037	-0.609234	0.542369	0.789132
ENSG00000066827	ZFAT	469.571	0.25015	0.275853	0.906823	0.3645	0.658732
ENSG00000066855	MTFR1	980.688	-0.626525	0.552642	-1.13369	0.256924	0.559272
ENSG00000066923	STAG3	1321.2	-0.594343	0.492495	-1.2068	0.22751	0.525467
ENSG00000066926	FECH	1015	-0.322929	0.348613	-0.926328	0.354276	0.651455
ENSG00000066933	MYO9A	1537.9	-0.0207135	0.38432	-0.0538965	0.957018	0.984006
ENSG00000067048	DDX3Y	5438.89	1.10185	0.650473	1.69392	0.0902811	0.321596
ENSG00000067057	PFKP	7402.15	1.75768	0.651211	2.6991	0.00695275	0.0664521
ENSG00000067064	IDI1	3688.96	0.935411	0.497632	1.87972	0.0601457	0.254819
ENSG00000067066	SP100	4701.9	0.625762	0.290483	2.15421	0.0312235	0.171719
ENSG00000067082	KLF6	10022.6	0.794935	0.298169	2.66605	0.00767475	0.0709386
ENSG00000067113	PLPP1	675.453	0.707356	0.411276	1.71991	0.0854493	0.312146
ENSG00000067141	NEO1	557.845	-0.378228	0.409374	-0.92392	0.355528	0.652393
ENSG00000067167	TRAM1	10756	0.286201	0.399347	0.716671	0.473577	0.743127
ENSG00000067177	PHKA1	170.017	0.499522	0.817916	0.610726	0.541381	0.788445
ENSG00000067182	TNFRSF1A	3576.57	-0.170735	0.291485	-0.585744	0.558048	0.798561
ENSG00000067191	CACNB1	542.526	1.18792	0.444641	2.67165	0.00754804	0.0700829
ENSG00000067208	EVI5	283.446	0.923256	0.693662	1.33099	0.183193	0.468519
ENSG00000067221	STOML1	954.628	0.363	0.352655	1.02934	0.303322	0.60598
ENSG00000067225	PKM	69247.8	1.72468	0.809818	2.12972	0.0331948	0.177496
ENSG00000067248	DHX29	1282.76	0.1894	0.463413	0.408707	0.682755	0.870116
ENSG00000067334	DNTTIP2	3761.73	1.00736	0.54799	1.83828	0.0660214	0.268806
ENSG00000067365	METTL22	690.065	0.459585	0.183004	2.51133	0.0120276	0.0947842
ENSG00000067369	TP53BP1	2298.13	1.03558	0.211179	4.90379	9.40049e-07	7.07509e-05
ENSG00000067445	TRO	206.016	-1.27733	0.504022	-2.53428	0.011268	0.0911326
ENSG00000067533	RRP15	2354	2.24353	0.596394	3.76182	0.000168682	0.00446871
ENSG00000067560	RHOA	26337	0.245141	0.406278	0.603383	0.546254	0.79168
ENSG00000067596	DHX8	3110.84	0.117113	0.271085	0.432017	0.665729	0.861558
ENSG00000067601	PMS2P4	44.6461	-1.03153	0.439211	-2.34861	0.0188436	0.125387
ENSG00000067606	PRKCZ	940.286	-0.600977	0.350209	-1.71605	0.0861527	0.313825
ENSG00000067646	ZFY	568.945	-0.60922	0.75593	-0.805922	0.420288	0.705333
ENSG00000067704	IARS2	4507.93	-0.278679	0.335047	-0.83176	0.405545	0.692409
ENSG00000067715	SYT1	3.40858	0.951323	1.36776	0.695535	0.48672	NA
ENSG00000067798	NAV3	38.2752	-0.178578	0.672723	-0.265455	0.790659	0.91926
ENSG00000067829	IDH3G	3027.48	0.0862319	0.443253	0.194543	0.84575	0.942655
ENSG00000067836	ROGDI	428.367	-1.14805	0.494053	-2.32373	0.02014	0.131094
ENSG00000067840	PDZD4	198.945	-0.065571	0.471411	-0.139095	0.889375	0.959177
ENSG00000067900	ROCK1	4652.56	-0.0474348	0.625019	-0.0758933	0.939504	0.976597
ENSG00000067955	CBFB	8710.42	1.16186	0.450373	2.57978	0.00988633	0.0837443
ENSG00000067992	PDK3	713.426	0.798578	0.506111	1.57787	0.114595	0.36495
ENSG00000068001	HYAL2	516.47	0.911674	0.679242	1.34219	0.179533	0.463424
ENSG00000068024	HDAC4	1846.96	1.02658	0.235184	4.365	1.27125e-05	0.000591431
ENSG00000068028	RASSF1	2954.04	-0.19141	0.189738	-1.00881	0.313066	0.616065
ENSG00000068078	FGFR3	15.5468	-0.234164	0.838621	-0.279225	0.780072	0.914889
ENSG00000068079	IFI35	3080.38	1.81906	0.607867	2.99253	0.00276672	0.0345775
ENSG00000068097	HEATR6	705.579	-0.380813	0.391662	-0.972301	0.330901	0.631645
ENSG00000068120	COASY	3651.74	-0.276027	0.45432	-0.60756	0.543479	0.78985
ENSG00000068137	PLEKHH3	32.3044	-0.160681	0.687438	-0.233738	0.815188	0.930762
ENSG00000068305	MEF2A	2093.74	0.361864	0.352998	1.02511	0.305309	0.608257
ENSG00000068308	OTUD5	6056.49	0.119022	0.333178	0.357233	0.720917	0.887746
ENSG00000068323	TFE3	2912.96	0.876864	0.302957	2.89436	0.00379938	0.0436334
ENSG00000068354	TBC1D25	1719.39	0.174423	0.260321	0.67003	0.502839	0.762828
ENSG00000068366	ACSL4	2690.27	1.70298	0.540109	3.15302	0.00161591	0.0234212
ENSG00000068383	INPP5A	799.459	-0.251077	0.167287	-1.50087	0.133389	0.397774
ENSG00000068394	GPKOW	1546.6	0.0597492	0.328082	0.182117	0.855491	0.946438
ENSG00000068400	GRIPAP1	4203.88	0.760136	0.220751	3.44341	0.000574423	0.0114378
ENSG00000068438	FTSJ1	3400.25	0.699979	0.393608	1.77837	0.0753438	0.289638
ENSG00000068489	PRR11	599.381	-0.190192	0.845173	-0.225034	0.821953	0.933253
ENSG00000068615	REEP1	23.2983	-0.627639	0.684685	-0.916682	0.359309	0.654598
ENSG00000068650	ATP11A	1742.94	0.780918	0.457633	1.70643	0.0879283	0.317349
ENSG00000068654	POLR1A	4015.3	2.25651	0.667693	3.37956	0.00072603	0.0135161
ENSG00000068697	LAPTM4A	3633.65	-0.121386	0.204764	-0.592811	0.553308	0.795691
ENSG00000068724	TTC7A	3856.15	0.459364	0.47839	0.96023	0.336939	0.637045
ENSG00000068745	IP6K2	3449.82	-0.226779	0.141817	-1.5991	0.109799	0.357144
ENSG00000068784	SRBD1	898.078	0.599473	0.345702	1.73407	0.0829051	0.306271
ENSG00000068796	KIF2A	4250.21	0.576169	0.449059	1.28306	0.199472	0.49156
ENSG00000068831	RASGRP2	15688.8	-1.40602	0.771497	-1.82246	0.068386	0.273978
ENSG00000068878	PSME4	3049.92	0.234161	0.304794	0.768261	0.442332	0.72291
ENSG00000068885	IFT80	823.804	-0.0825981	0.535951	-0.154115	0.877519	0.955265
ENSG00000068903	SIRT2	1972.67	-0.585254	0.26718	-2.19049	0.0284891	0.162264
ENSG00000068912	ERLEC1	2015.16	-0.167383	0.294833	-0.567721	0.570224	0.806893
ENSG00000068971	PPP2R5B	629.89	-0.561067	0.254928	-2.20088	0.0277445	0.159836
ENSG00000068976	PYGM	454.841	-0.371075	0.577072	-0.64303	0.520204	0.774516
ENSG00000069011	PITX1	12.0226	0.452855	0.799801	0.56621	0.571251	0.807381
ENSG00000069020	MAST4	1533.55	-0.324802	0.283448	-1.14589	0.251839	0.553691
ENSG00000069122	ADGRF5	1.2599	-0.469347	1.91296	-0.245351	0.806184	NA
ENSG00000069188	SDK2	777.587	-0.440457	0.741494	-0.594013	0.552504	0.795321
ENSG00000069248	NUP133	2857.03	-0.166505	0.306787	-0.542739	0.587309	0.815842
ENSG00000069275	NUCKS1	12893.1	-0.443941	0.341439	-1.30021	0.193531	0.48365
ENSG00000069329	VPS35	5386.17	0.155671	0.24092	0.646153	0.51818	0.773294
ENSG00000069345	DNAJA2	5471.78	0.977211	0.291963	3.34704	0.000816795	0.0145247
ENSG00000069399	BCL3	3273.62	3.16048	0.723709	4.36707	1.25927e-05	0.000586968
ENSG00000069424	KCNAB2	12717.7	-0.570378	0.368643	-1.54724	0.121806	0.377772
ENSG00000069431	ABCC9	181.803	-0.0604866	0.459364	-0.131675	0.895242	0.961543
ENSG00000069482	GAL	47.1731	2.43078	2.174	1.11811	0.263519	0.566367
ENSG00000069493	CLEC2D	14947.2	0.463781	0.42842	1.08254	0.279013	0.582408
ENSG00000069509	FUNDC1	483.662	-0.320854	0.363068	-0.88373	0.376842	0.66896
ENSG00000069535	MAOB	7.65767	1.71739	0.721989	2.3787	0.0173738	0.118939
ENSG00000069667	RORA	3579.31	-0.157746	0.402098	-0.392308	0.694831	0.875959
ENSG00000069696	DRD4	82.2807	-0.99691	0.592321	-1.68306	0.0923642	0.325857
ENSG00000069702	TGFBR3	643.517	0.0343486	0.329413	0.104272	0.916954	0.968464
ENSG00000069764	PLA2G10	21.04	-0.00833772	0.555524	-0.0150087	0.988025	0.995712
ENSG00000069812	HES2	18.3982	-0.855381	0.614512	-1.39197	0.163932	0.443793
ENSG00000069849	ATP1B3	3519.71	1.19539	0.624518	1.9141	0.0556077	0.2433
ENSG00000069869	NEDD4	957.926	-0.153867	0.432685	-0.355609	0.722133	0.888354
ENSG00000069943	PIGB	707.652	-0.364537	0.271517	-1.34259	0.179404	0.463355
ENSG00000069956	MAPK6	1877.78	0.812832	0.519479	1.5647	0.117652	0.370558
ENSG00000069966	GNB5	1702.73	-0.750948	0.276056	-2.72027	0.00652283	0.0637037
ENSG00000069974	RAB27A	3581.09	1.34755	0.528306	2.5507	0.0107508	0.0884612
ENSG00000069998	HDHD5	3012.03	0.377486	0.344427	1.09598	0.273087	0.576509
ENSG00000070010	UFD1	4528.72	0.317032	0.45355	0.699001	0.484551	0.751939
ENSG00000070018	LRP6	335.328	0.390255	0.428792	0.910128	0.362755	0.657566
ENSG00000070031	SCT	8.57005	0.761503	0.878297	0.867022	0.38593	0.677298
ENSG00000070047	PHRF1	6086.54	0.361761	0.346856	1.04297	0.296961	0.599942
ENSG00000070061	ELP1	3015.58	-0.586315	0.248486	-2.35955	0.0182969	0.123001
ENSG00000070081	NUCB2	3546.19	-0.0979058	0.417559	-0.234472	0.814619	0.930606
ENSG00000070087	PFN2	371.857	-1.45977	0.467982	-3.11929	0.00181285	0.0255972
ENSG00000070159	PTPN3	80.7351	0.284126	0.47247	0.601362	0.547599	0.79251
ENSG00000070182	SPTB	38.9293	0.0253506	0.530418	0.0477937	0.961881	0.985812
ENSG00000070190	DAPP1	2102.55	1.37806	0.620029	2.22258	0.0262444	0.154079
ENSG00000070214	SLC44A1	1206.32	-0.376968	0.390923	-0.9643	0.334896	0.634979
ENSG00000070269	TMEM260	983.42	-0.343143	0.49632	-0.691374	0.48933	0.754737
ENSG00000070366	SMG6	3501.92	0.423986	0.335856	1.26241	0.206803	0.500749
ENSG00000070367	EXOC5	2770.29	0.707918	0.610124	1.16029	0.245932	0.547106
ENSG00000070371	CLTCL1	41.0517	-0.227918	0.593889	-0.383773	0.701147	0.87905
ENSG00000070388	FGF22	21.2394	-0.190922	0.541283	-0.352721	0.724297	0.889416
ENSG00000070404	FSTL3	364.943	-0.472037	0.26318	-1.79359	0.0728794	0.283712
ENSG00000070413	DGCR2	4822.32	-0.486939	0.219803	-2.21534	0.0267365	0.155574
ENSG00000070423	RNF126	6463.7	0.0885478	0.341898	0.258989	0.795644	0.921652
ENSG00000070444	MNT	1735.01	0.35859	0.211758	1.69339	0.090381	0.321748
ENSG00000070476	ZXDC	2549.49	-0.205183	0.184627	-1.11134	0.266424	0.569377
ENSG00000070495	JMJD6	2173.65	0.213372	0.327943	0.650639	0.515279	0.771947
ENSG00000070501	POLB	1264.38	0.438118	0.168913	2.59375	0.00949342	0.0812482
ENSG00000070526	ST6GALNAC1	120.654	-0.32287	0.594513	-0.543084	0.587072	0.81565
ENSG00000070540	WIPI1	502.541	-0.432857	0.202378	-2.13886	0.0324471	0.175371
ENSG00000070601	FRMPD1	21.831	0.362854	0.537584	0.674972	0.499694	0.760812
ENSG00000070610	GBA2	2097.09	-0.377783	0.242958	-1.55493	0.119963	0.374574
ENSG00000070614	NDST1	325.384	-0.844219	0.557415	-1.51452	0.129893	0.391284
ENSG00000070669	ASNS	4137.83	2.14912	0.543912	3.95123	7.77514e-05	0.00242264
ENSG00000070718	AP3M2	3204.32	0.578727	0.251506	2.30105	0.0213887	0.135425
ENSG00000070729	CNGB1	34.0508	-0.108621	0.51175	-0.212254	0.831909	0.937101
ENSG00000070731	ST6GALNAC2	32.4798	-1.06321	0.653757	-1.62631	0.103883	0.347465
ENSG00000070748	CHAT	2.63474	0.847622	1.15154	0.736076	0.461685	NA
ENSG00000070756	PABPC1	167765	-0.492027	0.178054	-2.76336	0.00572088	0.0581323
ENSG00000070759	TESK2	462.965	0.688843	0.260734	2.64194	0.00824335	0.0743139
ENSG00000070761	CFAP20	2277.83	0.205903	0.421534	0.488462	0.625223	0.838873
ENSG00000070770	CSNK2A2	4237.17	-0.09776	0.157306	-0.621464	0.534294	0.784016
ENSG00000070778	PTPN21	7.72648	-1.49394	0.909688	-1.64225	0.100537	0.341004
ENSG00000070785	EIF2B3	1237.66	0.946984	0.517331	1.83052	0.0671723	0.271458
ENSG00000070808	CAMK2A	7.78901	-0.0840787	1.08983	-0.0771483	0.938506	0.976138
ENSG00000070814	TCOF1	8623.83	0.703541	0.516693	1.36162	0.173317	0.455144
ENSG00000070831	CDC42	13427	0.391047	0.27701	1.41167	0.158046	0.436519
ENSG00000070882	OSBPL3	1899.3	1.74592	0.529541	3.29705	0.000977057	0.0164027
ENSG00000070886	EPHA8	3.3146	-0.467592	1.28564	-0.363704	0.716079	NA
ENSG00000070915	SLC12A3	12.3979	0.299945	1.06526	0.281569	0.778274	0.914321
ENSG00000070950	RAD18	1276.67	0.536763	0.620506	0.865041	0.387016	0.678119
ENSG00000070961	ATP2B1	2192.33	0.560112	0.440027	1.2729	0.203052	0.49606
ENSG00000070985	TRPM5	11.9441	0.354489	0.782271	0.453155	0.650437	0.852063
ENSG00000071051	NCK2	5446.29	0.097967	0.140628	0.696642	0.486027	0.752781
ENSG00000071054	MAP4K4	7748.93	0.771121	0.125839	6.12783	8.90852e-10	1.92322e-07
ENSG00000071073	MGAT4A	6631.74	-0.834635	0.518307	-1.61031	0.10733	0.353206
ENSG00000071082	RPL31	86986.9	-0.562419	0.243779	-2.30708	0.0210502	0.134204
ENSG00000071127	WDR1	25737.3	0.983999	0.501052	1.96387	0.0495457	0.2263
ENSG00000071189	SNX13	1135.61	0.330812	0.359918	0.919132	0.358027	0.653803
ENSG00000071205	ARHGAP10	236.772	0.483961	0.405133	1.19457	0.232253	0.53116
ENSG00000071242	RPS6KA2	1337.83	-0.665921	0.397326	-1.67601	0.0937369	0.328206
ENSG00000071243	ING3	1249.89	0.318978	0.33002	0.966542	0.333773	0.633883
ENSG00000071246	VASH1	1122.81	-0.409777	0.347495	-1.17923	0.238307	0.538049
ENSG00000071282	LMCD1	120.58	0.467844	0.967946	0.483336	0.628857	0.840435
ENSG00000071462	BUD23	6221.35	0.855532	0.422531	2.02478	0.0428897	0.206932
ENSG00000071537	SEL1L	3581.96	0.708101	0.377814	1.87421	0.060902	0.256698
ENSG00000071539	TRIP13	913.375	0.587779	0.884775	0.664326	0.506482	0.765443
ENSG00000071553	ATP6AP1	4150.01	-0.662787	0.32488	-2.0401	0.0413407	0.202676
ENSG00000071564	TCF3	6250.45	0.360912	0.36768	0.981594	0.3263	0.628075
ENSG00000071575	TRIB2	3900.68	-0.35168	0.366211	-0.960321	0.336894	0.637008
ENSG00000071626	DAZAP1	13994.4	0.767011	0.349266	2.19606	0.0280874	0.160904
ENSG00000071655	MBD3	9520.02	0.599781	0.512601	1.17008	0.241971	0.542148
ENSG00000071794	HLTF	1110.34	-0.827134	0.537703	-1.53827	0.123982	0.381081
ENSG00000071859	FAM50A	3231.14	-0.413763	0.353203	-1.17146	0.241414	0.541494
ENSG00000071889	FAM3A	2655.22	-0.486177	0.315539	-1.54078	0.123369	0.380023
ENSG00000071894	CPSF1	6846.21	-0.28455	0.299632	-0.949665	0.342282	0.641848
ENSG00000071909	MYO3B	15.6686	-0.00725086	0.718264	-0.010095	0.991946	0.997288
ENSG00000071967	CYBRD1	100.785	-0.716106	0.451274	-1.58685	0.112546	0.361224
ENSG00000071991	CDH19	4.77442	1.71863	1.13224	1.5179	0.129041	NA
ENSG00000071994	PDCD2	5868.86	0.557303	0.347057	1.60579	0.108319	0.354359
ENSG00000072042	RDH11	3212.17	-0.0981313	0.206474	-0.475271	0.634594	0.844079
ENSG00000072062	PRKACA	3570.23	-0.356057	0.449093	-0.792835	0.427874	0.712235
ENSG00000072071	ADGRL1	2623.53	-0.104197	0.251643	-0.414068	0.678825	0.868279
ENSG00000072080	SPP2	4.81648	-1.27396	1.06477	-1.19646	0.231517	NA
ENSG00000072110	ACTN1	10379.7	-1.41667	0.347035	-4.08222	4.4607e-05	0.00160033
ENSG00000072121	ZFYVE26	1632.63	0.105615	0.243003	0.434623	0.663836	0.860402
ENSG00000072133	RPS6KA6	61.0024	0.109338	0.408352	0.267753	0.788889	0.918157
ENSG00000072134	EPN2	309.713	0.308397	0.247595	1.24557	0.212921	0.507749
ENSG00000072135	PTPN18	3953.55	-0.895908	0.392219	-2.2842	0.0223595	0.139314
ENSG00000072163	LIMS2	1074.38	-2.13058	0.457802	-4.65394	3.25659e-06	0.00019987
ENSG00000072182	ASIC4	27.6111	-0.571922	0.766223	-0.746417	0.455416	0.731465
ENSG00000072195	SPEG	572.355	-1.30303	0.560083	-2.32649	0.0199926	0.13056
ENSG00000072201	LNX1	163.481	-0.286049	0.561362	-0.509563	0.610358	0.82976
ENSG00000072210	ALDH3A2	1514.26	-0.579891	0.29997	-1.93316	0.0532162	0.236537
ENSG00000072274	TFRC	7672.72	2.06522	0.689892	2.99354	0.00275765	0.034486
ENSG00000072310	SREBF1	2966.46	1.64593	0.296089	5.5589	2.71477e-08	3.59211e-06
ENSG00000072315	TRPC5	1.56979	0.445906	1.79472	0.248455	0.803783	NA
ENSG00000072364	AFF4	3412.21	0.566836	0.388443	1.45925	0.144495	0.415295
ENSG00000072401	UBE2D1	1119.88	0.814729	0.373254	2.18277	0.0290526	0.164252
ENSG00000072415	MPP5	806.484	-0.495149	0.414443	-1.19473	0.232192	0.531134
ENSG00000072422	RHOBTB1	15.1863	-1.08318	0.905443	-1.1963	0.23158	0.530602
ENSG00000072501	SMC1A	8862.7	0.718705	0.557612	1.2889	0.197434	0.48864
ENSG00000072506	HSD17B10	4064.99	0.64339	0.622335	1.03383	0.301215	0.603877
ENSG00000072518	MARK2	3833.2	0.23867	0.229186	1.04138	0.297698	0.600633
ENSG00000072571	HMMR	412.133	0.592345	1.22994	0.481604	0.630087	0.840948
ENSG00000072609	CHFR	3672.55	-0.0056273	0.149115	-0.0377381	0.969897	0.988943
ENSG00000072657	TRHDE	17.4413	-1.61913	0.649858	-2.49151	0.0127202	0.0981179
ENSG00000072682	P4HA2	99.448	-0.0677446	0.482472	-0.140411	0.888335	0.958433
ENSG00000072694	FCGR2B	396.384	3.71229	0.834272	4.44973	8.59765e-06	0.00043449
ENSG00000072736	NFATC3	5241.1	0.279763	0.282865	0.989033	0.322647	0.624947
ENSG00000072756	TRNT1	1483.13	0.600179	0.27955	2.14694	0.0317978	0.173443
ENSG00000072778	ACADVL	6696.13	-0.321465	0.338736	-0.949014	0.342614	0.642052
ENSG00000072786	STK10	11715.8	-0.649099	0.295411	-2.19728	0.0280008	0.160604
ENSG00000072803	FBXW11	2470.25	0.307934	0.21706	1.41866	0.155999	0.433621
ENSG00000072818	ACAP1	12757.9	-1.45466	0.33461	-4.34733	1.37802e-05	0.00062921
ENSG00000072832	CRMP1	7.7404	1.55382	0.901929	1.72277	0.0849301	0.310766
ENSG00000072840	EVC	28.3343	0.283092	0.856621	0.330475	0.741041	0.898846
ENSG00000072849	DERL2	2599.06	0.404839	0.239078	1.69334	0.0903914	0.321748
ENSG00000072858	SIDT1	1910.86	-0.384838	0.330898	-1.16301	0.244826	0.545782
ENSG00000072864	NDE1	2022.39	0.609506	0.428545	1.42227	0.154949	0.432234
ENSG00000072952	MRVI1	4.94059	1.12461	1.42161	0.79108	0.428897	NA
ENSG00000072954	TMEM38A	61.0399	-0.5139	0.46964	-1.09424	0.273848	0.577323
ENSG00000072958	AP1M1	6817.47	-0.592329	0.362216	-1.63529	0.101988	0.343875
ENSG00000073008	PVR	382.05	1.62729	0.655697	2.48177	0.013073	0.0997023
ENSG00000073050	XRCC1	2390.59	-0.499469	0.277179	-1.80197	0.0715503	0.280687
ENSG00000073060	SCARB1	559.303	-0.519977	0.582006	-0.893422	0.371631	0.664117
ENSG00000073067	CYP2W1	5.85564	0.470259	1.14187	0.411832	0.680463	NA
ENSG00000073111	MCM2	8853.97	0.140249	0.799584	0.175402	0.860764	0.948191
ENSG00000073146	MOV10L1	3.76676	-0.324492	1.01924	-0.318365	0.750208	NA
ENSG00000073150	PANX2	69.1446	-0.306114	0.714176	-0.428625	0.668196	0.862627
ENSG00000073169	SELENOO	2815.62	-0.565943	0.216108	-2.61879	0.00882419	0.0775338
ENSG00000073282	TP63	7.85526	1.06293	1.01496	1.04726	0.294979	0.598199
ENSG00000073331	ALPK1	1366.86	1.7853	0.249327	7.16048	8.0396e-13	3.59453e-10
ENSG00000073350	LLGL2	1375.02	-1.12814	0.334325	-3.37437	0.000739852	0.01367
ENSG00000073417	PDE8A	1139.89	-0.390717	0.27874	-1.40173	0.160997	0.439929
ENSG00000073464	CLCN4	29.7261	0.549765	0.958986	0.573277	0.566457	0.804123
ENSG00000073536	NLE1	2696.93	1.39789	0.626697	2.23057	0.0257095	0.152283
ENSG00000073578	SDHA	6972.76	0.0716518	0.344226	0.208153	0.835109	0.938317
ENSG00000073584	SMARCE1	6040.35	0.262098	0.27538	0.95177	0.341214	0.641137
ENSG00000073598	FNDC8	21.6251	0.754487	0.548739	1.37495	0.169148	0.450142
ENSG00000073605	GSDMB	2084.8	-0.408535	0.448282	-0.911334	0.362119	0.657139
ENSG00000073614	KDM5A	4603.47	0.228245	0.254002	0.898593	0.368869	0.661969
ENSG00000073670	ADAM11	35.4138	-1.45835	0.664941	-2.19319	0.0282934	0.161675
ENSG00000073711	PPP2R3A	96.7431	-0.861783	0.557692	-1.54527	0.122282	0.378598
ENSG00000073712	FERMT2	39.902	-0.576744	0.471887	-1.22221	0.221629	0.518739
ENSG00000073734	ABCB11	18.0076	-1.80986	1.57482	-1.14925	0.250451	0.552218
ENSG00000073737	DHRS9	45.8927	-0.763491	1.18506	-0.644263	0.519405	0.773934
ENSG00000073756	PTGS2	37.9314	2.45103	0.578091	4.23987	2.23651e-05	0.000918909
ENSG00000073792	IGF2BP2	94.1297	0.284602	0.446232	0.637789	0.523611	0.77719
ENSG00000073803	MAP3K13	884.193	0.370243	0.273083	1.35579	0.175166	0.45818
ENSG00000073849	ST6GAL1	13633.7	0.21433	0.241267	0.888354	0.37435	0.666701
ENSG00000073861	TBX21	4710.15	5.40563	0.911044	5.93344	2.96655e-09	5.36836e-07
ENSG00000073905	VDAC1P1	2.07201	-1.91002	2.05844	-0.927899	0.35346	NA
ENSG00000073910	FRY	722.021	-0.0961521	0.615492	-0.15622	0.87586	0.954801
ENSG00000073921	PICALM	3906.58	0.309858	0.380693	0.813932	0.415684	0.70116
ENSG00000073969	NSF	1288.19	-0.283732	0.266089	-1.06631	0.286285	0.588891
ENSG00000074054	CLASP1	2821.5	-0.197514	0.334441	-0.590579	0.554803	0.796956
ENSG00000074071	MRPS34	6068.6	-0.313297	0.50707	-0.617858	0.536669	0.78544
ENSG00000074181	NOTCH3	17.9443	0.326549	0.672273	0.485739	0.627152	0.839673
ENSG00000074201	CLNS1A	5241.65	-0.016169	0.23499	-0.0688073	0.945143	0.978995
ENSG00000074211	PPP2R2C	7.21277	-2.26637	0.946078	-2.39554	0.0165959	0.116068
ENSG00000074219	TEAD2	33.3117	-0.0256916	0.53118	-0.0483671	0.961424	0.985612
ENSG00000074266	EED	3156.17	0.26003	0.401587	0.647507	0.517304	0.77305
ENSG00000074276	CDHR2	45.8131	-1.15231	0.671875	-1.71506	0.0863334	0.31417
ENSG00000074317	SNCB	0.938171	2.30108	3.56855	0.64482	0.519044	NA
ENSG00000074319	TSG101	2260.31	0.115519	0.244274	0.472908	0.636279	0.844904
ENSG00000074356	NCBP3	3296.92	0.41519	0.288783	1.43772	0.150513	0.425359
ENSG00000074370	ATP2A3	14357.9	-0.739298	0.396461	-1.86474	0.0622174	0.259588
ENSG00000074410	CA12	22.2978	0.210728	0.64449	0.326969	0.743691	0.900117
ENSG00000074416	MGLL	340.588	0.98746	0.454298	2.1736	0.0297355	0.166695
ENSG00000074527	NTN4	30.9089	-1.37909	0.525507	-2.62431	0.00868245	0.0767267
ENSG00000074582	BCS1L	1697.37	-0.15349	0.342718	-0.447861	0.654254	0.853884
ENSG00000074590	NUAK1	5.68919	-0.424019	1.02919	-0.411994	0.680344	NA
ENSG00000074603	DPP8	2730.84	0.22399	0.336397	0.66585	0.505507	0.764754
ENSG00000074621	SLC24A1	514.69	0.634925	0.214926	2.95416	0.00313525	0.0378614
ENSG00000074657	ZNF532	233.729	-0.0992153	0.350555	-0.283024	0.777159	0.913839
ENSG00000074660	SCARF1	158.49	0.719966	0.410858	1.75235	0.0797139	0.299426
ENSG00000074695	LMAN1	5535.95	1.2566	0.500189	2.51224	0.0119967	0.0946894
ENSG00000074696	HACD3	2747.35	0.348613	0.326742	1.06694	0.285999	0.588473
ENSG00000074706	IPCEF1	3632.35	1.11836	0.313419	3.56826	0.000359364	0.008077
ENSG00000074755	ZZEF1	5307.98	0.214542	0.248562	0.863134	0.388064	0.678334
ENSG00000074800	ENO1	123558	1.80933	0.820966	2.20391	0.0275309	0.158866
ENSG00000074803	SLC12A1	10.6209	-1.14154	1.1486	-0.993849	0.320296	0.62322
ENSG00000074842	MYDGF	4544.17	0.880249	0.451937	1.94773	0.0514479	0.231774
ENSG00000074855	ANO8	714.461	-1.01471	0.385874	-2.62963	0.00854771	0.0759176
ENSG00000074935	TUBE1	2054.82	0.850602	0.293702	2.89614	0.00377788	0.043488
ENSG00000074964	ARHGEF10L	8.80798	-0.689485	1.04768	-0.658106	0.51047	0.768484
ENSG00000074966	TXK	2383.2	-0.0766871	0.514144	-0.149155	0.881431	0.956287
ENSG00000075035	WSCD2	4.78381	-1.06736	1.67825	-0.635995	0.52478	NA
ENSG00000075043	KCNQ2	16.9398	-1.60255	1.10016	-1.45665	0.145213	0.416433
ENSG00000075073	TACR2	22.7124	1.05602	0.548483	1.92535	0.0541852	0.239066
ENSG00000075089	ACTR6	1486.53	-0.102762	0.521876	-0.196909	0.843899	0.941732
ENSG00000075131	TIPIN	816.148	0.686463	0.590705	1.16211	0.245191	0.546027
ENSG00000075142	SRI	3693.16	0.431779	0.422065	1.02302	0.3063	0.609187
ENSG00000075151	EIF4G3	1565.65	1.74482	0.481237	3.62569	0.000288191	0.00678673
ENSG00000075188	NUP37	1296.41	0.0253277	0.501496	0.0505042	0.959721	0.984851
ENSG00000075213	SEMA3A	18.297	-0.804511	1.18949	-0.67635	0.498818	0.760291
ENSG00000075218	GTSE1	802.791	0.224612	0.886784	0.253289	0.800045	0.923498
ENSG00000075223	SEMA3C	86.1273	0.601794	0.61231	0.982825	0.325693	0.627408
ENSG00000075234	TTC38	443.383	-0.648491	0.445484	-1.4557	0.145476	0.41675
ENSG00000075239	ACAT1	1510.04	-0.038626	0.402065	-0.0960691	0.923466	0.970212
ENSG00000075240	GRAMD4	1973.78	1.10173	0.431467	2.55346	0.010666	0.0880282
ENSG00000075275	CELSR1	270.1	-0.65688	0.443393	-1.48148	0.138478	0.406207
ENSG00000075290	WNT8B	16.6395	-0.433408	0.630691	-0.687196	0.491959	0.756017
ENSG00000075292	ZNF638	4265.46	-0.270748	0.571143	-0.474046	0.635467	0.844526
ENSG00000075303	SLC25A40	1511.01	-0.260867	0.287316	-0.907942	0.363909	0.658289
ENSG00000075336	TIMM21	1416.03	0.376613	0.420058	0.896574	0.369946	0.662396
ENSG00000075340	ADD2	1011.17	0.147628	0.625264	0.236105	0.813351	0.930046
ENSG00000075391	RASAL2	34.6876	0.324072	0.913366	0.35481	0.722732	0.888681
ENSG00000075399	VPS9D1	894.712	-0.449923	0.275586	-1.63261	0.102552	0.344936
ENSG00000075407	ZNF37A	1427.44	0.563077	0.396514	1.42007	0.155588	0.43292
ENSG00000075413	MARK3	4640.13	0.191722	0.225019	0.852024	0.394201	0.683706
ENSG00000075415	SLC25A3	20943.1	0.36114	0.461718	0.782167	0.434116	0.71705
ENSG00000075420	FNDC3B	730.537	1.83945	0.32714	5.62283	1.87859e-08	2.65713e-06
ENSG00000075426	FOSL2	5322.95	3.81296	0.863648	4.41495	1.01035e-05	0.000495333
ENSG00000075461	CACNG4	2.16645	-0.908345	1.41435	-0.642233	0.520722	NA
ENSG00000075539	FRYL	4124.22	0.524744	0.404259	1.29804	0.194275	0.484249
ENSG00000075568	TMEM131	2829.31	-0.273213	0.320749	-0.851797	0.394327	0.683723
ENSG00000075618	FSCN1	3324.33	3.84112	0.754821	5.08879	3.60358e-07	3.26058e-05
ENSG00000075624	ACTB	388343	1.16856	0.586137	1.99366	0.0461895	0.21628
ENSG00000075643	MOCOS	51.0406	0.986015	0.45925	2.14701	0.0317923	0.173443
ENSG00000075651	PLD1	73.6658	-1.36827	0.535212	-2.55651	0.0105728	0.0876417
ENSG00000075673	ATP12A	19.2402	1.4747	1.08294	1.36175	0.173277	0.455144
ENSG00000075702	WDR62	575.289	0.221689	0.713506	0.310704	0.756026	0.905485
ENSG00000075711	DLG1	2307.62	0.424937	0.346335	1.22695	0.219841	0.516269
ENSG00000075785	RAB7A	11123.4	0.576681	0.328856	1.7536	0.0794997	0.298986
ENSG00000075790	BCAP29	907.666	0.118078	0.52095	0.226659	0.820689	0.932716
ENSG00000075826	SEC31B	1670.96	-0.478346	0.466645	-1.02508	0.305327	0.608257
ENSG00000075856	SART3	5010.48	0.521016	0.269117	1.93602	0.0528657	0.235617
ENSG00000075884	ARHGAP15	3893.91	0.054762	0.407874	0.134262	0.893196	0.960692
ENSG00000075886	TUBA3D	108.453	-0.480504	0.370066	-1.29843	0.194141	0.484249
ENSG00000075891	PAX2	1.40297	0.957282	3.10964	0.307844	0.758201	NA
ENSG00000075914	EXOSC7	2019.94	0.0856994	0.357617	0.23964	0.810609	0.928724
ENSG00000075945	KIFAP3	1173.1	0.194326	0.219143	0.886756	0.37521	0.667548
ENSG00000075975	MKRN2	2077.06	0.0536083	0.157143	0.341143	0.732996	0.89474
ENSG00000076003	MCM6	6572.65	0.129583	0.626742	0.206756	0.8362	0.938614
ENSG00000076043	REXO2	1936.65	-0.216502	0.172462	-1.25536	0.209348	0.503713
ENSG00000076053	RBM7	2204.32	0.84974	0.354191	2.3991	0.0164352	0.115508
ENSG00000076067	RBMS2	350.949	-0.124518	0.412962	-0.301525	0.763014	0.907699
ENSG00000076108	BAZ2A	6871.02	0.323157	0.247133	1.30762	0.191001	0.479323
ENSG00000076201	PTPN23	2504.77	0.151803	0.331257	0.458265	0.646762	0.849894
ENSG00000076242	MLH1	2489.87	0.234135	0.376352	0.622115	0.533866	0.783626
ENSG00000076248	UNG	2710.83	-0.471134	0.596042	-0.790437	0.429272	0.713309
ENSG00000076258	FMO4	139.521	-0.568453	0.404346	-1.40586	0.159767	0.438695
ENSG00000076321	KLHL20	1012.61	0.0198677	0.390614	0.0508628	0.959435	0.984681
ENSG00000076344	RGS11	9.00634	-0.245045	0.800896	-0.305964	0.759632	0.906527
ENSG00000076351	SLC46A1	445.539	-0.679494	0.300938	-2.25792	0.0239508	0.145421
ENSG00000076356	PLXNA2	51.9361	1.58458	0.751484	2.1086	0.0349792	0.18293
ENSG00000076382	SPAG5	1328.5	-0.985394	0.648262	-1.52006	0.128497	0.388698
ENSG00000076513	ANKRD13A	4118.29	0.178003	0.211694	0.840853	0.40043	0.688568
ENSG00000076554	TPD52	1277.73	-0.11975	0.343588	-0.348527	0.727445	0.891525
ENSG00000076555	ACACB	1048.34	-0.555019	0.306619	-1.81013	0.0702761	0.277976
ENSG00000076604	TRAF4	3357.37	3.27772	0.688424	4.76119	1.92459e-06	0.000130485
ENSG00000076641	PAG1	7059.07	-0.0668135	0.406598	-0.164323	0.869477	0.95266
ENSG00000076650	GPATCH1	1007.96	-0.0318265	0.172182	-0.184842	0.853353	0.945561
ENSG00000076662	ICAM3	10577.2	-0.916169	0.403288	-2.27175	0.0231019	0.142007
ENSG00000076685	NT5C2	2855.72	0.197263	0.244853	0.805638	0.420452	0.705464
ENSG00000076706	MCAM	135.912	0.467058	0.633568	0.737186	0.461009	0.73501
ENSG00000076716	GPC4	6.07568	-1.58341	0.882808	-1.79361	0.0728762	NA
ENSG00000076770	MBNL3	1369.95	0.157604	0.358262	0.439913	0.66	0.858352
ENSG00000076826	CAMSAP3	56.5181	-0.0585816	0.751632	-0.0779392	0.937876	0.975763
ENSG00000076864	RAP1GAP	24.0876	0.327366	0.892001	0.367002	0.713618	0.884898
ENSG00000076924	XAB2	6944.69	-0.186815	0.348003	-0.536821	0.591391	0.818225
ENSG00000076928	ARHGEF1	27890.1	-0.558015	0.301273	-1.85219	0.0639983	0.264139
ENSG00000076944	STXBP2	4996.27	0.00147297	0.369233	0.00398927	0.996817	0.999335
ENSG00000076984	MAP2K7	4126.91	-0.00289302	0.277706	-0.0104176	0.991688	0.997288
ENSG00000077044	DGKD	6212.8	-0.170188	0.435021	-0.391217	0.695637	0.876139
ENSG00000077063	CTTNBP2	19.4444	0.993435	1.21206	0.819622	0.412431	0.698651
ENSG00000077092	RARB	16.3592	-1.26853	0.683084	-1.85706	0.0633025	0.262367
ENSG00000077097	TOP2B	8078.62	-0.434493	0.533785	-0.813986	0.415653	0.70116
ENSG00000077147	TM9SF3	7225.92	0.603503	0.436718	1.38191	0.167	0.447088
ENSG00000077150	NFKB2	14085.8	3.0556	0.481574	6.34504	2.22368e-10	5.3133e-08
ENSG00000077152	UBE2T	1316	-0.785365	0.802287	-0.978909	0.327625	0.629346
ENSG00000077157	PPP1R12B	816.242	0.0616545	0.381355	0.161672	0.871564	0.953596
ENSG00000077232	DNAJC10	3296.66	0.91231	0.481511	1.89468	0.0581344	0.249302
ENSG00000077235	GTF3C1	3704.64	-0.511528	0.311097	-1.64427	0.10012	0.340197
ENSG00000077238	IL4R	14386	1.66712	0.448358	3.71827	0.000200593	0.00509473
ENSG00000077254	USP33	3698.04	-0.100782	0.417965	-0.241126	0.809457	0.928138
ENSG00000077264	PAK3	44.1847	1.12869	0.408053	2.76604	0.00567408	0.0577283
ENSG00000077279	DCX	3.64189	0.620907	1.13886	0.545201	0.585615	NA
ENSG00000077312	SNRPA	5545.72	-0.155636	0.574	-0.271143	0.786281	0.91728
ENSG00000077327	SPAG6	3.77691	-1.20226	1.55788	-0.771727	0.440276	NA
ENSG00000077348	EXOSC5	1997.29	0.569124	0.438184	1.29883	0.194004	0.484169
ENSG00000077380	DYNC1I2	3341.98	-0.0322435	0.250686	-0.128621	0.897658	0.962288
ENSG00000077420	APBB1IP	5122.42	-0.288044	0.197489	-1.45853	0.144695	0.415716
ENSG00000077454	LRCH4	6711.64	-1.17144	0.361311	-3.2422	0.00118612	0.0187625
ENSG00000077458	FAM76B	1833.53	-0.0631052	0.592617	-0.106486	0.915197	0.967907
ENSG00000077463	SIRT6	1406.77	0.599766	0.418588	1.43283	0.151905	0.427898
ENSG00000077498	TYR	4.11983	0.18884	1.12586	0.167729	0.866797	NA
ENSG00000077514	POLD3	1444.04	-0.128564	0.563362	-0.228209	0.819483	0.932378
ENSG00000077522	ACTN2	5.81736	2.55926	1.27011	2.01499	0.0439053	NA
ENSG00000077549	CAPZB	15465.1	0.0881955	0.353756	0.249311	0.80312	0.925052
ENSG00000077585	GPR137B	526.17	0.398216	0.267632	1.48792	0.136771	0.403317
ENSG00000077616	NAALAD2	71.523	0.0673675	0.526743	0.127894	0.898233	0.962323
ENSG00000077684	JADE1	4156.13	-0.181166	0.218919	-0.827546	0.407927	0.694679
ENSG00000077713	SLC25A43	254.217	0.184724	0.371251	0.497573	0.618785	0.835381
ENSG00000077721	UBE2A	2689.58	0.490367	0.331698	1.47835	0.139314	0.40792
ENSG00000077782	FGFR1	405.089	0.116448	0.337628	0.344902	0.730168	0.893132
ENSG00000077800	FKBP6	46.7455	0.698118	0.751017	0.929564	0.352597	0.650263
ENSG00000077935	SMC1B	77.6441	1.18999	0.373396	3.18695	0.00143782	0.0214983
ENSG00000077942	FBLN1	50.2924	0.26587	0.32576	0.816155	0.414412	0.700382
ENSG00000077943	ITGA8	13.4311	-0.571803	0.749372	-0.763043	0.445438	0.725468
ENSG00000077984	CST7	747.844	1.07794	0.541046	1.99233	0.0463344	0.216711
ENSG00000078018	MAP2	23.5944	1.34857	0.814099	1.65652	0.0976175	0.33533
ENSG00000078043	PIAS2	1669.79	0.550185	0.377028	1.45927	0.144491	0.415295
ENSG00000078053	AMPH	36.9846	-1.29819	0.542959	-2.39095	0.0168048	0.116777
ENSG00000078061	ARAF	5633.37	0.0821634	0.383644	0.214166	0.830418	0.936604
ENSG00000078070	MCCC1	1140.91	-0.501383	0.174964	-2.86564	0.00416163	0.0464077
ENSG00000078081	LAMP3	1320.91	3.1074	0.582924	5.33071	9.78295e-08	1.056e-05
ENSG00000078098	FAP	4.62523	-1.4385	1.18538	-1.21354	0.224924	NA
ENSG00000078114	NEBL	50.0931	2.38145	0.880594	2.70437	0.00684346	0.0656625
ENSG00000078124	ACER3	675.167	-0.35689	0.371768	-0.959982	0.337064	0.637105
ENSG00000078140	UBE2K	4435.74	0.560637	0.364118	1.53971	0.123631	0.380431
ENSG00000078142	PIK3C3	2014.85	0.375715	0.252794	1.48625	0.137213	0.403942
ENSG00000078177	N4BP2	812.187	0.114109	0.712982	0.160044	0.872846	0.953972
ENSG00000078237	TIGAR	554.319	0.747047	0.613621	1.21744	0.223436	0.520953
ENSG00000078246	TULP3	490.266	-0.228597	0.245551	-0.930955	0.351877	0.649807
ENSG00000078269	SYNJ2	3187	2.69564	0.522862	5.15555	2.5289e-07	2.3938e-05
ENSG00000078295	ADCY2	35.984	0.447268	0.535826	0.834726	0.403872	0.691344
ENSG00000078304	PPP2R5C	10361.6	-0.335183	0.162481	-2.0629	0.0391218	0.195466
ENSG00000078319	PMS2P1	664.183	0.76191	0.379542	2.00744	0.0447023	0.211966
ENSG00000078328	RBFOX1	5.18379	-0.140578	0.939847	-0.149575	0.8811	NA
ENSG00000078369	GNB1	18210.6	0.589747	0.370621	1.59124	0.111556	0.359782
ENSG00000078399	HOXA9	88.9316	-1.11006	0.566181	-1.96062	0.0499235	0.227194
ENSG00000078401	EDN1	40.3822	0.205189	0.594754	0.344998	0.730096	0.893132
ENSG00000078403	MLLT10	2176.52	-0.446681	0.244881	-1.82407	0.0681415	0.273336
ENSG00000078487	ZCWPW1	622.514	-0.480833	0.438567	-1.09637	0.272915	0.576378
ENSG00000078579	FGF20	1.87724	-1.31498	2.43949	-0.539039	0.58986	NA
ENSG00000078589	P2RY10	1524.17	0.12445	0.336027	0.370357	0.711116	0.883911
ENSG00000078596	ITM2A	6168.66	-0.407272	0.153716	-2.64952	0.00806073	0.0733122
ENSG00000078618	NRDC	5604.03	0.253992	0.200825	1.26474	0.205963	0.499583
ENSG00000078668	VDAC3	5247.51	-0.475064	0.324642	-1.46335	0.143372	0.413629
ENSG00000078674	PCM1	5354.99	-0.275046	0.586268	-0.469148	0.638964	0.846187
ENSG00000078687	TNRC6C	4100.77	-0.675637	0.329715	-2.04916	0.0404468	0.199807
ENSG00000078699	CBFA2T2	2639.3	-0.637816	0.357019	-1.78651	0.0740173	0.286161
ENSG00000078747	ITCH	2904.55	-0.0650599	0.21666	-0.300286	0.763959	0.908124
ENSG00000078795	PKD2L2	40.3526	0.26493	0.469954	0.563735	0.572934	0.808468
ENSG00000078804	TP53INP2	150.685	1.37749	0.51144	2.69335	0.00707376	0.0671134
ENSG00000078808	SDF4	11081.5	0.789326	0.403888	1.95432	0.0506635	0.229416
ENSG00000078814	MYH7B	169.678	-0.309168	0.405425	-0.762578	0.445715	0.725637
ENSG00000078900	TP73	123.575	-0.857514	0.837527	-1.02386	0.3059	0.608757
ENSG00000078902	TOLLIP	3608.64	0.312858	0.396858	0.788336	0.4305	0.714385
ENSG00000078967	UBE2D4	879.568	0.218874	0.294348	0.743589	0.457125	0.732156
ENSG00000079101	CLUL1	8.75253	-1.23972	0.93136	-1.33109	0.183161	0.468519
ENSG00000079102	RUNX1T1	3.37477	3.47078	1.71092	2.0286	0.042499	NA
ENSG00000079112	CDH17	11.5485	0.869605	0.816918	1.06449	0.287105	0.589574
ENSG00000079134	THOC1	2450.21	0.502177	0.435404	1.15336	0.248763	0.549776
ENSG00000079150	FKBP7	102.425	0.410831	0.480162	0.855609	0.392214	0.682277
ENSG00000079156	OSBPL6	96.8042	-0.325125	0.303404	-1.07159	0.283904	0.586513
ENSG00000079215	SLC1A3	17.5831	2.67841	0.789929	3.39069	0.000697162	0.0131733
ENSG00000079246	XRCC5	21268.9	0.847406	0.442337	1.91575	0.0553974	0.242595
ENSG00000079257	LXN	305.361	-0.901558	0.392665	-2.296	0.0216761	0.136594
ENSG00000079263	SP140	2297.19	1.43422	0.266545	5.38077	7.41673e-08	8.29696e-06
ENSG00000079277	MKNK1	1737.84	-0.126235	0.17357	-0.727288	0.46705	0.738879
ENSG00000079308	TNS1	42.6936	0.406166	1.11755	0.363443	0.716274	0.886132
ENSG00000079313	REXO1	4457.75	0.661678	0.23946	2.7632	0.00572369	0.0581369
ENSG00000079332	SAR1A	6159.04	0.596015	0.224729	2.65215	0.00799805	0.073039
ENSG00000079335	CDC14A	2161.86	-0.340146	0.624789	-0.544416	0.586155	0.815537
ENSG00000079337	RAPGEF3	88.8666	0.371344	0.534581	0.694646	0.487277	0.753527
ENSG00000079385	CEACAM1	793.614	0.650235	0.293167	2.21796	0.0265574	0.155066
ENSG00000079387	SENP1	1580.26	0.762159	0.399109	1.90965	0.0561783	0.244688
ENSG00000079393	DUSP13	0.913688	0	3.65938	0	1	NA
ENSG00000079432	CIC	4904.28	-0.212686	0.301361	-0.705751	0.480343	0.748509
ENSG00000079435	LIPE	1100.59	-0.706927	0.44857	-1.57596	0.115036	0.365777
ENSG00000079459	FDFT1	8109.38	0.0579628	0.373498	0.155189	0.876672	0.954976
ENSG00000079462	PAFAH1B3	1548.69	-0.25333	0.571444	-0.443316	0.657537	0.856406
ENSG00000079482	OPHN1	586.026	-0.521596	0.47407	-1.10025	0.271223	0.574107
ENSG00000079616	KIF22	5410.85	-0.770923	0.466263	-1.65341	0.0982477	0.33671
ENSG00000079691	CARMIL1	480.338	-0.680639	0.358526	-1.89844	0.0576384	0.248607
ENSG00000079739	PGM1	1681.96	0.0169399	0.465916	0.0363584	0.970997	0.989274
ENSG00000079785	DDX1	4090.04	0.301802	0.354045	0.852438	0.393971	0.68354
ENSG00000079805	DNM2	13388.3	-0.314632	0.296158	-1.06238	0.288064	0.590719
ENSG00000079819	EPB41L2	986.282	1.72524	0.40313	4.2796	1.87229e-05	0.000797215
ENSG00000079841	RIMS1	5.2252	-0.453834	1.02314	-0.443571	0.657353	NA
ENSG00000079931	MOXD1	5.35198	1.62179	1.37144	1.18255	0.23699	NA
ENSG00000079950	STX7	1340.64	-0.0490628	0.340004	-0.1443	0.885263	0.957325
ENSG00000079974	RABL2B	2231.3	-0.348876	0.229716	-1.51873	0.128831	0.389211
ENSG00000079999	KEAP1	4234.2	0.334643	0.484518	0.690673	0.489771	0.755059
ENSG00000080007	DDX43	48.7548	0.324443	0.525713	0.617149	0.537137	0.785704
ENSG00000080031	PTPRH	12.5119	0.478784	0.750068	0.638321	0.523265	0.77677
ENSG00000080166	DCT	95.9296	-0.26401	1.30484	-0.202331	0.839658	0.939865
ENSG00000080189	SLC35C2	4382.49	-0.118371	0.259996	-0.45528	0.648908	0.851203
ENSG00000080200	CRYBG3	150.27	-0.277694	0.91092	-0.30485	0.760481	0.906884
ENSG00000080224	EPHA6	0.707114	-0.862742	6.26153	-0.137785	0.890411	NA
ENSG00000080293	SCTR	2.94143	-2.07827	1.60989	-1.29094	0.196724	NA
ENSG00000080298	RFX3	820.974	0.143784	0.287404	0.500285	0.616875	0.833969
ENSG00000080345	RIF1	3986.42	0.471622	0.631142	0.747252	0.454912	0.731161
ENSG00000080371	RAB21	4148.89	1.02093	0.340968	2.99422	0.00275146	0.0344437
ENSG00000080493	SLC4A4	20.4952	-0.735929	0.724419	-1.01589	0.309683	0.612718
ENSG00000080503	SMARCA2	6725.39	-0.758051	0.334774	-2.26437	0.0235516	0.143864
ENSG00000080511	RDH8	5.01411	0.460592	0.975784	0.472022	0.636911	NA
ENSG00000080546	SESN1	2294.39	-0.399513	0.483122	-0.82694	0.408271	0.694997
ENSG00000080561	MID2	266.549	0.546114	0.403941	1.35196	0.176387	0.459602
ENSG00000080572	PIH1D3	1.98493	-1.94776	1.85362	-1.05078	0.293358	NA
ENSG00000080573	COL5A3	56.6723	2.04018	0.722054	2.82552	0.00472035	0.0508192
[truncated: 31,474 more rows]

## Sheet: 48hr CD28
48hr CD28 DE
[truncated: 32,906 more rows]

[truncated: 9 more sheets: 48hr CD3, 48hr CD3CD28, RBP-Temporal Changes, RBP 8hr CD3CD28_CD3 Ratio, RBP 48hr CD3CD28_CD3 Ratio, RBP Sig 8hr CD3 changes, RBP Sig 8hr CD3CD28 changes, RBP Sig 48hr CD3 changes, RBP Sig 48hr CD3CD28 changes]
