# Supplementary material for: Alternative splicing of apoptosis genes promotes human T cell survival
Source: eLife. 2022 Oct 20;11:e80953. doi: 10.7554/eLife.80953 (PMC9625086; doi:10.7554/eLife.80953)
Supplement: Supplementary file 2. [file elife-80953-supp2.xlsx]

## Sheet: 8hr CD28 Donor 1
8hr CD28 AS Events - Donor 1
	X.Gene.Name	Gene.ID	LSV.ID	E.dPSI..per.LSV.junction	P..dPSI...0.10..per.LSV.junction	P..dPSI...0.05..per.LSV.junction	ND307.8hr.Unstim.E.PSI.	ND307.8hr.CD28.E.PSI.	LSV.Type	A5SS	A3SS	ES	Num..Junctions	Num..Exons	De.Novo.Junctions	chr	strand	Junctions.coords	Exons.coords	IR.coords
1	CELSR3	gene:ENSG00000008300	ENSG00000008300:t:48680987-48681473	0.0001324956910039241;0.0001324956910039241;0.0001324956910039241;0.8510978359917594;-0.8678417336210146	0.0009674779268141426;0.0009674779268141426;0.0009674779268141426;0.9999886988967106;0.9999684814616778	0.9888090684722483;0.9888090684722483;0.9888090684722483;8.308054908870493e-06;2.3767728423162993e-05	0.013;0.013;0.013;0.013;0.950	0.017;0.017;0.017;0.850;0.100	t|2e1.1o3|1e1.1o3|3e2.1o3|2e2.1o3|1e2.1o3	FALSE	TRUE	TRUE	5	3	1;1;1;1;0	3	-	48681113-48682149;48681110-48682149;48681473-48681649;48681113-48681649;48681110-48681649	48680987-48681473;48681649-48681728;48682149-48682261
2	CSGALNACT1	gene:ENSG00000147408	ENSG00000147408:t:19459282-19459376	0.006239757347693686;-4.975348923453914e-08;-0.23708958142239617;0.2576659253740708;-4.866913417938802e-08;-4.975348923453914e-08;-4.866913417938802e-08;-0.009710138918650841;-0.014236065394071115;-4.975348923453914e-08;-4.975348923453914e-08;3.0424721919322104e-05;-4.975348923453914e-08;-4.975348923453914e-08;-4.975348923453914e-08;-4.975348923453914e-08;-4.866913417938802e-08;-4.975348923453914…	0.004719650783730471;5.5846820779294965e-11;0.9037310276299241;0.9978945376335691;5.5846819967608666e-11;5.5846820779294965e-11;5.5846819967608666e-11;0.0017052217693897618;0.005856899539725615;5.5846820779294965e-11;5.5846820779294965e-11;1.5583077194331777e-08;5.5846820779294965e-11;5.5846820779294965e-11;5.5846820779294965e-11;5.5846820779294965e-11;5.5846819967608666e-11;5.5846820779294965e-1…	0.8958033310421084;0.999999490650545;0.053943362401535966;0.00018310196940526813;0.9999994795494817;0.999999490650545;0.9999994795494817;0.8983155373388758;0.8434043794268763;0.999999490650545;0.999999490650545;0.9995360275209915;0.999999490650545;0.999999490650545;0.999999490650545;0.999999490650545;0.9999994795494817;0.999999490650545;0.999999490650545	0.143;0.000;0.675;0.049;0.000;0.000;0.000;0.055;0.069;0.000;0.000;0.007;0.000;0.000;0.000;0.000;0.000;0.000;0.000	0.173;0.000;0.422;0.303;0.005;0.000;0.005;0.029;0.040;0.000;0.000;0.024;0.000;0.000;0.000;0.000;0.005;0.000;0.000	t|1e1.1o9|1e2.1o1|1e3.3o12|1e3.1o12|1e4.1o1|1e5.1o1|1e6.1o1|1e7.1o3|1e8.1o1|1e9.1o1|1e10.1o1|1e11.1o2|1e12.1o1|1e13.1o1|1e14.1o1|1e15.1o1|1e16.1o1|1e17.2o3|1e17.1o3	TRUE	FALSE	TRUE	19	18	0;1;0;1;1;1;1;1;1;1;1;1;0;0;1;1;1;0;0	8	-	19459376-19615361;19459376-19614961;19459376-19614697;19459376-19614450;19459376-19610567;19459376-19609004;19459376-19598949;19459376-19589967;19459376-19572396;19459376-19569279;19459376-19562272;19459376-19540439;19459376-19540207;19459376-19539984;19459376-19523400;19459376-19487234;19459376-19482653;19459376-19459913;19459376-19459503	19459282-19459376;19459503-19460006;19482653-nan;19487234-nan;19523400-nan;19539984-19540094;19540207-19540272;19540439-19540592;19562272-nan;19569279-nan;19572396-19572535;19589967-19590077;19598949-19599046;19609004-nan;19610567-19610737;19614450-19614816;19614961-19614971;19615361-19615540
3	TLK2	gene:ENSG00000146872	ENSG00000146872:s:60600495-60600538	-3.974232027281528e-05;0.375759506017653;-0.32970558551394225;-0.002728713550776339	2.976019820795411e-06;0.9877790925017517;0.9614214680204605;0.0006204200856331025	0.9994812793202684;0.007019020267531867;0.023421685585719887;0.9720390571058259	0.004;0.468;0.491;0.040	0.003;0.830;0.165;0.003	s|1e1.1o2|1e1.2o2|1e2.1o5|1e3.1o8	FALSE	TRUE	TRUE	4	4	1;0;0;1	17	+	60600538-60601206;60600538-60601597;60600538-60613531;60600538-60629663	60600495-60600538;60601206-60601692;60613531-60614061;60629663-60629758
4	ZNF468	gene:ENSG00000204604	ENSG00000204604:t:53352340-53352985	-6.0791279186910686e-05;-0.4886458913696245;-6.0791279186910686e-05;0.41978797468764417;-1.4686720371505482e-05;-0.012120889970273904;0.06943616610515851	9.205107883046513e-06;0.9999973677454379;9.205107883046513e-06;0.9965568515598064;9.674471946376362e-06;0.01141381804906506;0.3087524672373102	0.9993569153738963;2.2800071264317268e-07;0.9993569153738963;0.0018411123825870911;0.9988856184724495;0.8785909382038655;0.4867250251694322	0.004;0.503;0.004;0.354;0.004;0.079;0.054	0.001;0.020;0.001;0.767;0.010;0.001;0.197	t|1e1.1o1|1e2.1o1|3e3.1o5|1e3.1o5|1e4.3o3|1e4.2o3|1e4.1o3	TRUE	TRUE	TRUE	7	5	1;1;1;0;1;1;1	19	-	53352466-53421112;53352466-53393494;53352985-53357511;53352466-53357511;53352466-53357265;53352466-53357132;53352466-53357125	53352340-53352985;53357125-53357379;53357511-53357598;53393494-53393504;53421112-53421122
5	CTAGE5	gene:ENSG00000150527	ENSG00000150527:s:39788413-39788495	0.25564555153477264;-0.2556455515347711	0.9725016110093098;0.9725016110093098	0.008193981877658723;0.00819398187765874	0.638;0.362	0.891;0.109	s|1e1.1o1|1e2.1o6	FALSE	FALSE	TRUE	2	3	0;0	14	+	39788495-39790132;39788495-39796068	39788413-39788495;39790132-39790260;39796068-39796226
6	CKMT2-AS1	gene:ENSG00000247572	ENSG00000247572:t:80533384-80535179	-0.01672532168091421;0.354333796981402;-8.094401220865648e-06;-0.33535646853152834;-8.094401220865648e-06;0.0004924055010645804;0.0021414403276934775;-0.0033745444961685357;0.03820888589950205;-8.094401220865648e-06;-8.094401220865648e-06;-8.094401220865648e-06;0.0021414403276934775;-0.00851666398331061	0.06658479755361738;0.9988168337266731;2.2048362064203417e-06;0.9982072451650397;2.2048362064203417e-06;5.867066570064423e-05;0.000453674224532675;0.0011419625538925682;0.07780162455254369;2.2048362064203417e-06;2.2048362064203417e-06;2.2048362064203417e-06;0.000453674224532675;0.005195746998390814	0.8034995258745337;0.0004484894196575068;0.9997262524763937;0.0001980637257609219;0.9997262524763937;0.994611351856888;0.9777886293523881;0.9654461732340232;0.6315195658233992;0.9997262524763937;0.9997262524763937;0.9997262524763937;0.9777886293523881;0.9135981680124275	0.501;0.022;0.001;0.349;0.001;0.001;0.001;0.043;0.001;0.001;0.001;0.001;0.001;0.064	0.407;0.375;0.001;0.001;0.001;0.019;0.037;0.001;0.110;0.001;0.001;0.001;0.037;0.001	t|2e1.1o14|1e1.1o14|2e2.1o3|2e3.1o5|1e3.1o5|2e4.7o9|1e4.7o9|2e4.1o9|1e4.1o9|2e5.1o1|2e6.1o1|2e7.3o3|2e7.1o3|1e7.1o3	TRUE	TRUE	TRUE	14	8	0;1;1;0;1;1;1;1;0;1;1;1;1;1	5	-	80535179-80597106;80535174-80597106;80535179-80595969;80535179-80542709;80535174-80542709;80535179-80541068;80535174-80541068;80535179-80540563;80535174-80540563;80535179-80538784;80535179-80536147;80535179-80535723;80535179-80535283;80535174-80535283	80533384-80535179;80535283-80535786;80536147-80536199;80538784-nan;80540563-80541228;80542709-80542791;80595969-80596156;80597106-80597379
7	PDIK1L	gene:ENSG00000175087	ENSG00000175087:t:26440783-26441084	0.2662029943407897;-0.031365433003536475;-0.02699490614960526	0.9711753372724715;0.12185421920566666;0.09378675475275686	0.01860417149083012;0.7448550467218245;0.7682642489343976	0.014;0.710;0.272	0.294;0.570;0.137	t|1e1.1o3|1e2.1o3|1e3.1o1	FALSE	FALSE	TRUE	3	4	0;0;0	1	+	26437911-26440783;26438406-26440783;26439141-26440783	26437664-26437911;26438328-26438406;26438951-26439141;26440783-26441084
8	RAD51D	gene:ENSG00000185379	ENSG00000185379:s:33445520-33445638	0.30586205178504494;-0.0029667025759851193;-0.14837447031425927;-0.00012722200924822848;-0.0010899645071528674;-0.00012722200924822848;-0.00012722200924822848;-0.00012722200924822848	0.9959754525723509;0.002029135364764066;0.5133222645596374;5.0818248958259485e-05;0.00872312359012744;5.0818248958259485e-05;5.0818248958259485e-05;5.0818248958259485e-05	0.0020428779895464567;0.9698680615671252;0.3862398198927133;0.9984159365627188;0.8950103480535145;0.9984159365627188;0.9984159365627188;0.9984159365627188	0.005;0.043;0.851;0.005;0.082;0.005;0.005;0.005	0.325;0.002;0.595;0.002;0.070;0.002;0.002;0.002	s|1e1.1o2|1e2.1o1|1e3.1o6|1e4.2o5|1e5.4o9|1e5.1o9|1e6.1o4|1e7.1o6	FALSE	TRUE	TRUE	8	8	0;1;0;0;1;1;1;1	17	-	33444056-33445520;33443811-33445520;33434466-33445520;33434141-33445520;33433500-33445520;33433496-33445520;33430563-33445520;33428384-33445520	33428220-33428400;33430473-33430563;33433405-33433500;33434007-33434141;33434385-33434466;33443714-33443811;33443878-33444056;33445520-33445638
9	DMAP1	gene:ENSG00000178028	ENSG00000178028:t:44679335-44679530	-0.03203067530972311;0.2515894142190391;-0.06034963300268907;-0.00033466772426135984;0.01263138498606494;-3.668738356151321e-08;-0.0032772584052884147;-0.014105163584724712	0.050272766780190103;0.9592404686397623;0.20255134278266526;1.0540464770271655e-06;0.003136580819748397;8.485298377732372e-12;6.724509516040664e-05;0.0015495607735884838	0.6790145760301032;0.017137164678267012;0.4539199338035109;0.9965739083306442;0.8564989504582462;0.9999995972608025;0.9663187446634552;0.8557257094306236	0.143;0.539;0.149;0.025;0.037;0.001;0.044;0.062	0.072;0.792;0.052;0.001;0.065;0.001;0.013;0.009	t|1e1.1o8|2e1.1o8|3e1.1o8|1e1.4o8|2e1.4o8|3e1.4o8|2e1.7o8|3e1.8o8	TRUE	TRUE	FALSE	8	2	0;0;0;1;1;1;1;0	1	+	44679199-44679335;44679199-44679381;44679199-44679421;44679221-44679335;44679221-44679381;44679221-44679421;44679254-44679381;44679334-44679421	44679127-44679334;44679335-44679530
10	ZNF512	gene:ENSG00000243943	ENSG00000243943:s:27806455-27806583	0.000967139220240236;-0.00011545092786448878;-0.433343075687293;0.4065671348196118;-0.00011545092786448878;-0.00011545092786448878	0.00012189503600621198;3.1171198132899095e-05;0.999758625253532;0.999965317675179;3.1171198132899095e-05;3.1171198132899095e-05	0.9875981765846182;0.9986528957644367;0.00013631894032284375;1.802918979193138e-05;0.9986528957644367;0.9986528957644367	0.005;0.005;0.975;0.005;0.005;0.005	0.029;0.002;0.541;0.422;0.002;0.002	s|1e1.2o2|1e2.1o11|1e2.2o11|1e2.6o11|1e2.10o11|1e3.1o2	FALSE	TRUE	TRUE	6	4	1;1;0;0;1;1	2	+	27806583-27807119;27806583-27820897;27806583-27820934;27806583-27820937;27806583-27821035;27806583-27838035	27806455-27806583;27806627-27807177;27820897-27821121;27838035-27838139
11	ZNF512	gene:ENSG00000243943	ENSG00000243943:t:27820897-27821121	-2.5211514530372362e-05;-2.5211514530372362e-05;0.004101166117325591;0.00041480336555809794;0.0007454427602514988;-2.5211514530372362e-05;-2.5211514530372362e-05;-0.3472914140846218;0.2672741953973307;-2.5211514530372362e-05;0.00019914181828514153	2.8174898472757603e-06;2.8174898472757603e-06;0.019469065325931605;0.003383567448918595;2.1351192152720726e-05;2.8174898472757603e-06;2.8174898472757603e-06;0.9648388170296358;0.999481101622998;2.8174898472757603e-06;5.653338273244092e-06	0.9997320054251024;0.9997320054251024;0.8641106111562895;0.9118264358353442;0.9918495160255717;0.9997320054251024;0.9997320054251024;0.022787996773104724;6.381303293408182e-05;0.9997320054251024;0.9974370095630092	0.002;0.002;0.228;0.067;0.002;0.002;0.002;0.701;0.002;0.002;0.002	0.001;0.001;0.240;0.065;0.028;0.001;0.001;0.350;0.285;0.001;0.019	t|2e1.1o15|3e1.1o15|2e1.4o15|3e1.4o15|4e1.4o15|6e1.4o15|1e2.1o6|2e2.1o6|3e2.1o6|5e2.1o6|2e3.1o1	TRUE	TRUE	TRUE	11	4	1;1;0;1;1;1;1;0;0;1;1	2	+	27805995-27820934;27805995-27820937;27806009-27820934;27806009-27820937;27806009-27820940;27806009-27821050;27806583-27820897;27806583-27820934;27806583-27820937;27806583-27821035;27807177-27820934	27805897-27806043;27806455-27806583;27806627-27807177;27820897-27821121
12	CECR1	gene:ENSG00000093072	ENSG00000093072:t:17690246-17690779	-2.434300967015369e-05;-2.434300967015369e-05;-2.434300967015369e-05;0.5882028399230564;-0.0009390150074920999;-0.22160281128741088;-0.0036403063976102904;0.0012647895710154956;-2.434300967015369e-05;-0.3014620263678296;-2.434300967015369e-05	2.483689033829348e-06;2.483689033829348e-06;2.483689033829348e-06;0.9999998819007393;0.00018095872466889913;0.9066956206942974;0.0013074569553612476;4.370295640027756e-05;2.483689033829348e-06;0.9771583762778152;2.483689033829348e-06	0.9997454675039072;0.9997454675039072;0.9997454675039072;2.3599300937488097e-08;0.9904054456220092;0.03586648054712771;0.9629302805391755;0.9865606762654008;0.9997454675039072;0.009778135661264398;0.9997454675039072	0.002;0.002;0.002;0.282;0.024;0.269;0.045;0.002;0.002;0.377;0.002	0.001;0.001;0.001;0.854;0.001;0.033;0.001;0.033;0.001;0.074;0.001	t|4e1.1o3|2e1.1o3|1e1.1o3|4e2.1o5|3e2.1o5|1e2.1o5|4e3.3o3|4e3.1o3|1e3.1o3|4e4.1o2|1e4.1o2	TRUE	TRUE	TRUE	11	5	0;0;0;0;0;1;1;1;1;1;1	22	-	17690613-17702617;17690575-17702617;17690488-17702617;17690613-17700246;17690580-17700246;17690488-17700246;17690613-17693395;17690613-17693148;17690488-17693148;17690613-17692893;17690488-17692893	17690246-17690779;17692893-nan;17693148-17693468;17700246-17700325;17702617-17702879
13	PARP11	gene:ENSG00000111224	ENSG00000111224:t:3935324-3935399	0.3230751038198673;-0.3230751038198658	0.9926590151587521;0.992659015158752	0.003938356564090592;0.003938356564090584	0.035;0.965	0.353;0.647	t|1e1.1o3|1e2.1o2	FALSE	FALSE	TRUE	2	3	0;0	12	-	3935399-3939056;3935399-3938076	3935324-3935399;3938076-3938196;3939056-3939184
14	RP5-827C21.4	gene:ENSG00000231663	ENSG00000231663:t:234508553-234508956	-0.38159344518536686;0.41372993239887196;-0.0009681864459153581;-0.0006847189742864145	0.9932869762375333;0.9995048010146438;0.005200698794992683;1.4305552479557787e-05	0.003277482816190891;0.00016999052179101658;0.9048802013871584;0.9928870004655463	0.635;0.213;0.126;0.027	0.263;0.617;0.119;0.003	t|2e1.3o3|2e1.1o3|1e1.1o3|2e2.1o1	TRUE	TRUE	TRUE	4	3	1;0;1;1	1	-	234508956-234509264;234508956-234509169;234508936-234509169;234508956-234509134	234508553-234508956;234509134-234509144;234509169-234509339
15	ING2	gene:ENSG00000168556	ENSG00000168556:t:184431435-184432249	-0.00014086164517824827;-0.00014086164517824827;-0.28467353227968084;0.2855291159620735	2.6958626095030657e-05;2.6958626095030657e-05;0.9893165225150171;0.9974405876539938	0.9984974533623631;0.9984974533623631;0.005266110393336243;0.000901038136252828	0.007;0.007;0.980;0.007	0.002;0.002;0.690;0.308	t|1e1.1o2|1e1.2o2|1e2.1o2|1e3.1o1	TRUE	FALSE	TRUE	4	4	1;1;0;0	4	+	184425831-184431435;184425838-184431435;184426520-184431435;184427471-184431435	184425821-184425838;184426147-184426520;184427235-184427471;184431435-184432249
16	THNSL2	gene:ENSG00000144115	ENSG00000144115:t:88485417-88486146	-0.08441174971734729;-0.007325544395271467;7.176244810419819e-05;-0.538599835438424;7.176244810419819e-05;0.5011499933509961;0.17853314239160423	0.3379275120111107;0.031543174517005675;7.840408886091032e-05;0.9994930530923686;7.840408886091032e-05;0.9992994592655067;0.6566345439765556	0.37451084048824135;0.8453540293606759;0.9974611625967025;0.00033507638195939826;0.9974611625967025;0.00039494403149183723;0.23326513227305884	0.176;0.176;0.004;0.576;0.004;0.033;0.033	0.006;0.126;0.006;0.046;0.006;0.526;0.286	t|1e1.1o3|1e2.1o7|2e2.1o7|1e3.1o5|2e3.1o5|1e4.2o3|2e4.2o3	FALSE	TRUE	TRUE	7	5	0;0;1;0;1;0;1	2	+	88478532-88485417;88482592-88485417;88482592-88485452;88484998-88485417;88484998-88485452;88485243-88485417;88485243-88485452	88478302-88478532;88482467-88482592;88484847-88484998;88485047-88485243;88485417-88486146
17	OFD1	gene:ENSG00000046651	ENSG00000046651:s:13769368-13769487	1.0559554564193553e-05;0.4412275594766759;-3.7012710031491176e-06;-0.4192376574708938;1.0559554564193553e-05;-0.01281588906753088	4.875901888635324e-08;0.999966529144075;3.84482849997686e-08;0.9998732322634258;4.875901888635324e-08;0.005116555600388998	0.9998155281594224;7.699708958908429e-06;0.999961501243413;3.3321704278055364e-05;0.9998155281594224;0.8617831946398695	0.002;0.260;0.002;0.665;0.002;0.069	0.012;0.691;0.001;0.255;0.012;0.030	s|1e1.1o3|2e1.1o3|2e2.1o5|2e2.2o5|2e3.1o5|2e4.1o4	TRUE	TRUE	TRUE	6	5	1;0;1;0;1;1	X	+	13769486-13770823;13769487-13770823;13769487-13771471;13769487-13771487;13769487-13773270;13769487-13774697	13769368-13769487;13770823-13771223;13771471-13771560;13773270-13773361;13774697-13774886
18	TPK1	gene:ENSG00000196511	ENSG00000196511:s:144380002-144380071	0.42164684048368545;-9.623630025262565e-05;-0.41639827510593697;-9.623630025262565e-05;-9.623630025262565e-05	0.9839664346548648;7.673781717596514e-05;0.9746577869780876;7.673781717596514e-05;7.673781717596514e-05	0.011215786622812723;0.9969999237772599;0.018222434407951904;0.9969999237772599;0.9969999237772599	0.076;0.007;0.903;0.007;0.007	0.492;0.005;0.492;0.005;0.005	s|1e1.1o1|1e2.1o3|1e3.1o5|1e4.1o6|1e5.1o9	FALSE	FALSE	TRUE	5	6	0;0;0;1;1	7	-	144378957-144380002;144364939-144380002;144345972-144380002;144320354-144380002;144150756-144380002	144149034-144150756;144320259-144320354;144345900-144345972;144364819-144364939;144378900-144378957;144380002-144380071
19	NQO2	gene:ENSG00000124588	ENSG00000124588:t:3002284-3002520	0.0001005662532786263;0.004178923911438664;0.6087163833500063;-0.6480434629772208	0.0003702762485228892;0.00488995149463043;0.9986147121163146;0.9999815437877326	0.9922157819858767;0.9521712470315753;0.0010111893775529913;1.2528705304881704e-05	0.010;0.010;0.330;0.663	0.013;0.062;0.913;0.013	t|1e1.1o6|1e2.1o2|1e3.1o8|1e4.1o4	FALSE	FALSE	TRUE	4	5	1;1;0;1	6	+	2994287-3002284;2999593-3002284;3000319-3002284;3001466-3002284	2994165-2994287;2999575-2999593;3000110-3000319;3001344-3001466;3002284-3002520
20	FAM221A	gene:ENSG00000188732	ENSG00000188732:t:23740405-23740487	-0.23718246014560646;-3.089454045976817e-05;-3.089454045976817e-05;-3.089454045976817e-05;0.3045551127210181;-0.00801366811432895	0.9608227268629178;6.494098600896003e-06;6.494098600896003e-06;6.494098600896003e-06;0.9675617119900587;0.011066070947315676	0.007427634839375807;0.9992826586192917;0.9992826586192917;0.9992826586192917;0.01737791788296188;0.8786419312324991	0.264;0.004;0.004;0.004;0.628;0.089	0.003;0.003;0.003;0.003;0.938;0.051	t|1e1.1o8|2e1.1o8|1e2.1o3|1e3.1o2|1e4.1o2|2e4.1o2	FALSE	TRUE	TRUE	6	5	0;1;1;1;0;1	7	+	23731215-23740405;23731215-23740408;23731872-23740405;23734532-23740405;23737918-23740405;23737918-23740408	23731009-23731215;23731802-23731876;23734510-23734532;23737811-23737918;23740405-23740487
21	LLGL2	gene:ENSG00000073350	ENSG00000073350:s:73521807-73521906	-0.027920503729873973;-0.00012243205160863434;-0.4083534763131502;-0.046232630899340314;0.011398578936529766;0.6356828579650914;-0.00012243205160863434;-0.00012243205160863434	0.08698500906994446;3.877988595522824e-05;0.9916218149650179;0.13857684319342262;0.0037890106578227266;0.999997764705665;3.877988595522824e-05;3.877988595522824e-05	0.7559378321621701;0.9987190970157277;0.004500536375228514;0.6088667470276211;0.8813099271094643;9.983743165700812e-07;0.9987190970157277;0.9987190970157277	0.183;0.004;0.504;0.147;0.004;0.147;0.004;0.004	0.063;0.001;0.097;0.001;0.065;0.772;0.001;0.001	s|1e1.1o1|1e2.1o4|1e3.1o2|1e4.1o3|1e4.3o3|1e5.2o11|1e5.11o11|1e6.1o4	FALSE	TRUE	TRUE	8	7	1;0;0;1;1;0;1;1	17	+	73521906-73527931;73521906-73529723;73521906-73534612;73521906-73535871;73521906-73535874;73521906-73539478;73521906-73539486;73521906-73552127	73521807-73521906;73527931-73528110;73529723-73529786;73534612-73534717;73535871-73535967;73539342-73539582;73552127-73552224
22	ZNF197	gene:ENSG00000186448	ENSG00000186448:s:44666511-44666635	-0.00016238750028793432;0.41416012025320037;-0.38780260313903014;-0.00016238750028793432;-0.00016238750028793432;-0.00016238750028793432;-0.00016238750028793432	9.309737546133259e-05;0.9694369832350865;0.9391147879597613;9.309737546133259e-05;9.309737546133259e-05;9.309737546133259e-05;9.309737546133259e-05	0.9975050779993931;0.02254230535509986;0.045993595483723504;0.9975050779993931;0.9975050779993931;0.9975050779993931;0.9975050779993931	0.006;0.093;0.876;0.006;0.006;0.006;0.006	0.003;0.508;0.476;0.003;0.003;0.003;0.003	s|1e1.1o1|1e2.2o4|1e2.3o4|1e3.1o3|1e4.1o5|1e5.1o3|1e6.1o4	FALSE	TRUE	TRUE	7	7	1;0;0;1;1;1;1	3	+	44666635-44667330;44666635-44670557;44666635-44670566;44666635-44672554;44666635-44673597;44666635-44673965;44666635-44687983	44666511-44666635;44667330-nan;44670480-44671036;44672554-44672713;44673597-44673688;44673965-44674091;44687983-44689963
23	ISY1-RAB43	gene:ENSG00000261796	ENSG00000261796:t:128813829-128814012	-5.760959796007614e-05;-5.760959796007614e-05;-5.760959796007614e-05;0.0020775911224243334;-0.010276632238972325;-5.760959796007614e-05;-5.760959796007614e-05;-5.760959796007614e-05;-0.015519055470538013;0.00570841486476517;-0.023489286983706427;-5.760959796007614e-05;-5.760959796007614e-05;-5.760959796007614e-05;-5.760959796007614e-05;-5.760959796007614e-05;-5.760959796007614e-05;0.2420175782839…	2.4872951755648463e-05;2.4872951755648463e-05;2.4872951755648463e-05;0.0036814462529689684;0.01380120142099964;2.4872951755648463e-05;2.4872951755648463e-05;2.4872951755648463e-05;0.07038192324873656;0.002353691463337114;0.08523498340291777;2.4872951755648463e-05;2.4872951755648463e-05;2.4872951755648463e-05;2.4872951755648463e-05;2.4872951755648463e-05;2.4872951755648463e-05;0.9670814453622377	0.999261463550197;0.999261463550197;0.999261463550197;0.9261209646302283;0.8997848075541705;0.999261463550197;0.999261463550197;0.999261463550197;0.8022638722867658;0.9405797694641067;0.7820339666634087;0.999261463550197;0.999261463550197;0.999261463550197;0.999261463550197;0.999261463550197;0.999261463550197;0.009893053429736292	0.002;0.002;0.002;0.043;0.084;0.002;0.002;0.002;0.553;0.002;0.288;0.002;0.002;0.002;0.002;0.002;0.002;0.002	0.001;0.001;0.001;0.056;0.001;0.001;0.001;0.001;0.442;0.056;0.165;0.001;0.001;0.001;0.001;0.001;0.001;0.266	t|1e1.1o2|1e2.1o4|1e3.4o4|1e3.1o4|1e4.1o1|1e5.1o1|1e6.1o1|1e7.1o1|1e8.1o1|1e9.1o1|1e10.1o1|1e11.1o1|1e12.1o1|1e13.1o1|1e14.1o1|1e15.1o1|1e16.1o1|1e17.1o1	TRUE	FALSE	TRUE	18	18	1;1;1;0;1;1;1;1;1;1;1;1;1;1;1;1;1;1	3	-	128814012-128902619;128814012-128852917;128814012-128848985;128814012-128848931;128814012-128841979;128814012-128840824;128814012-128840587;128814012-128840554;128814012-128840143;128814012-128839024;128814012-128838829;128814012-128837351;128814012-128831854;128814012-128828867;128814012-128825620;128814012-128822128;128814012-128816509;128814012-128814440	128813829-128814012;128814440-nan;128816509-nan;128822128-nan;128825620-nan;128828867-128829020;128831854-nan;128837351-nan;128838829-nan;128839024-nan;128840143-nan;128840554-nan;128840587-nan;128840824-nan;128841979-128842079;128848931-128849031;128852917-128853038;128902619-128902629
24	ST3GAL3	gene:ENSG00000126091	ENSG00000126091:s:44303891-44303983	-2.8323062932172504e-05;0.14177994807333022;-2.8323062932172504e-05;-2.8323062932172504e-05;0.11067752133302908;-0.3723193649776324;-2.8323062932172504e-05;-2.8323062932172504e-05;-2.8323062932172504e-05	3.7492590838475634e-06;0.5338055614255317;3.7492590838475634e-06;3.7492590838475634e-06;0.5049524684109311;0.9538122333510384;3.7492590838475634e-06;3.7492590838475634e-06;3.7492590838475634e-06	0.9996335212117626;0.35678625183826923;0.9996335212117626;0.9996335212117626;0.3197721338549598;0.03272830658902004;0.9996335212117626;0.9996335212117626;0.9996335212117626	0.002;0.155;0.002;0.002;0.045;0.790;0.002;0.002;0.002	0.001;0.374;0.001;0.001;0.214;0.403;0.001;0.001;0.001	s|1e1.1o1|1e2.1o1|1e3.1o3|1e3.2o3|1e3.3o3|1e4.1o6|1e5.1o3|1e6.3o12|1e7.2o11	FALSE	TRUE	TRUE	9	8	1;1;1;1;1;0;1;1;0	1	+	44303983-44309741;44303983-44323807;44303983-44344699;44303983-44345003;44303983-44345007;44303983-44360055;44303983-44363907;44303983-44386076;44303983-44395804	44303891-44303983;44309741-44309801;44323807-44323980;44344699-44345179;44360055-44360149;44363907-44363970;44385604-44386222;44395691-44396831
25	RPS14	gene:ENSG00000164587	ENSG00000164587:s:149828832-149829259	-2.067755723403914e-06;-2.067755723403914e-06;-2.067755723403914e-06;-2.067755723403914e-06;0.3175431117643896;-0.1813723198311139;-2.067755723403914e-06;-2.067755723403914e-06;-0.02251410485854073;-2.067755723403914e-06;-2.067755723403914e-06;-2.067755723403914e-06;-2.067755723403914e-06	1.1617114904032958e-07;1.1617114904032958e-07;1.1617114904032958e-07;1.1617114904032958e-07;0.9534582750842651;0.6555306636242175;1.1617114904032958e-07;1.1617114904032958e-07;0.018532668397616744;1.1617114904032958e-07;1.1617114904032958e-07;1.1617114904032958e-07;1.1617114904032958e-07	0.9999422405225459;0.9999422405225459;0.9999422405225459;0.9999422405225459;0.028390550407626093;0.2492569277425719;0.9999422405225459;0.9999422405225459;0.7725345096040666;0.9999422405225459;0.9999422405225459;0.9999422405225459;0.9999422405225459	0.001;0.001;0.001;0.001;0.178;0.726;0.001;0.001;0.083;0.001;0.001;0.001;0.001	0.001;0.001;0.001;0.001;0.507;0.483;0.001;0.001;0.001;0.001;0.001;0.001;0.001	s|4e1.26o27|7e1.6o27|6e1.6o27|5e1.6o27|4e1.6o27|3e1.6o27|2e1.6o27|1e1.6o27|3e1.4o27|4e1.2o27|4e2.6o19|3e2.6o19|3e2.4o19	TRUE	TRUE	TRUE	13	3	1;1;1;1;0;0;1;1;1;1;1;1;1	5	-	149827318-149829055;149827298-149829108;149827298-149829087;149827298-149829070;149827298-149829055;149827298-149829049;149827298-149828909;149827298-149828832;149827297-149829049;149827296-149829055;149826526-149829055;149826526-149829049;149826524-149829049	149826365-149826986;149827037-149827359;149828832-149829259
26	PCNXL2	gene:ENSG00000135749	ENSG00000135749:s:233431072-233431459	0.34903376892530896;-0.1629212344114146;7.830554072480394e-06;0.014826755158714114;0.011426751069314707;-0.18779497715253568;7.830554072480394e-06;7.830554072480394e-06	0.9822577547907927;0.7104164642762789;2.8811954368997844e-05;0.02018204769629443;0.026408194824908773;0.5670828415796202;2.8811954368997844e-05;2.8811954368997844e-05	0.01027169058407906;0.11754491474761153;0.9985500015673336;0.8532858307228011;0.8458907530518437;0.3486422835458144;0.9985500015673336;0.9985500015673336	0.031;0.215;0.003;0.003;0.058;0.688;0.003;0.003	0.379;0.004;0.004;0.093;0.123;0.386;0.004;0.004	s|1e1.1o1|1e2.1o1|1e3.1o1|1e4.1o1|1e5.1o1|1e6.2o3|1e6.1o3|1e7.1o3	FALSE	TRUE	TRUE	8	8	1;1;1;1;1;0;1;1	1	-	233430249-233431072;233425281-233431072;233425226-233431072;233408883-233431072;233407748-233431072;233398909-233431072;233398868-233431072;233397067-233431072	nan-233407748;nan-233425226;nan-233425281;nan-233430249;233397031-233397067;233398704-233398909;233408850-233408883;233431072-233431459
27	EP400NL	gene:ENSG00000185684	ENSG00000185684:s:132593117-132593444	-0.0002463091806014047;-0.05588606069820819;-0.0002463091806014047;-0.012994274028751179;0.515981594795684;-0.09235484648153881;-0.0002463091806014047	0.00013098115850591077;0.1978129676953167;0.00013098115850591077;0.024681935958489176;0.9990318136822238;0.3440426761540603;0.00013098115850591077	0.9974208392958489;0.6763796911844588;0.9974208392958489;0.8678927130793905;0.0006678797554506472;0.41876417264115273;0.9974208392958489	0.007;0.607;0.007;0.107;0.057;0.207;0.007	0.002;0.406;0.002;0.026;0.564;0.002;0.002	s|1e1.1o1|1e2.1o2|1e3.1o1|1e4.1o2|1e5.1o4|1e6.1o3|1e7.1o10	FALSE	FALSE	TRUE	7	8	1;0;1;1;0;1;1	12	+	132593227-132593683;132593227-132594313;132593227-132595628;132593227-132598116;132593227-132599003;132593227-132601419;132593227-132604965	132593117-132593444;132593683-132593939;132594313-132594377;132595628-nan;132598116-132598224;132599003-132599090;132601419-132601759;132604965-132605146
28	MADD	gene:ENSG00000110514	ENSG00000110514:t:47295378-47295527	0.00021933999118513167;-0.29989912352955;0.0933051799535096;-7.618798604733111e-05;-0.03421844041326154;0.10729324490653867;-7.618798604733111e-05	1.9340325884564405e-05;0.9531930308116134;0.3617244802900238;1.394650998623207e-05;0.10768285010021583;0.3947419308759827;1.394650998623207e-05	0.9961774235281629;0.02420488477055538;0.5044101576272239;0.9991977949201614;0.7020721723809199;0.48155067827260406;0.9991977949201614	0.004;0.382;0.193;0.004;0.166;0.247;0.004	0.020;0.076;0.388;0.001;0.049;0.463;0.001	t|1e1.1o1|1e2.1o2|1e3.1o6|1e3.4o6|1e3.5o6|1e4.1o2|1e5.1o1	TRUE	FALSE	TRUE	7	6	0;0;0;1;0;0;0	11	+	47290834-47295378;47291195-47295378;47291301-47295378;47291425-47295378;47291457-47295378;47291797-47295378;47293881-47295378	47290712-47290834;47290927-47291195;47291223-47291457;47291699-47291797;47293795-47293881;47295378-47295527
29	PIK3CG	gene:ENSG00000105851	ENSG00000105851:s:106505723-106505871	0.0003809523218405955;0.48206166481459173;-0.478849223433588;-0.0005278030954450792;-0.0005278030954450792	0.0006831805013227503;0.9969211864805821;0.9809678447235415;0.0004893284035450142;0.0004893284035450142	0.9842308368439336;0.002364247131741574;0.014892072611141782;0.9936569078760411;0.9936569078760411	0.014;0.014;0.943;0.014;0.014	0.025;0.499;0.465;0.004;0.004	s|2e1.2o2|1e2.1o4|2e2.1o4|1e3.2o4|2e3.2o4	TRUE	FALSE	TRUE	5	4	1;0;0;1;0	7	+	106505871-106506186;106505795-106507995;106505871-106507995;106505795-106512982;106505871-106512982	106505723-106505871;106505924-106506221;106507995-106510001;106512876-106513047
30	PIK3CG	gene:ENSG00000105851	ENSG00000105851:t:106507995-106510001	0.46512044893710663;-0.4693615137553334;-0.0006984150353264569;0.00027268822949478856	0.993876039028544;0.9783592499392764;0.0006824808947807613;0.0009015880618323193	0.00474912175702041;0.017005498759336435;0.9915977448594867;0.9814888491288583	0.018;0.946;0.018;0.018	0.489;0.475;0.005;0.026	t|1e1.1o5|1e1.3o5|1e2.1o2|1e2.2o2	TRUE	FALSE	TRUE	4	3	0;0;1;0	7	+	106505795-106507995;106505871-106507995;106506058-106507995;106506221-106507995	106505723-106505871;106505924-106506221;106507995-106510001
31	TP73-AS1	gene:ENSG00000227372	ENSG00000227372:t:3656797-3656966	-2.7045747722376663e-07;-2.7045747722376663e-07;-0.2509428136645675;-2.7045747722376663e-07;0.16762410132260508;-2.7045747722376663e-07;0.03694653723964382	4.117889491914431e-10;4.117889491914431e-10;0.9867001122815382;4.117889491914431e-10;0.8374061993434806;4.117889491914431e-10;0.018554363357138164	0.9999969573459859;0.9999969573459859;0.0034852082319504207;0.9999969573459859;0.05984053940982172;0.9999969573459859;0.6231122577268681	0.001;0.001;0.902;0.001;0.076;0.001;0.016	0.001;0.001;0.654;0.001;0.260;0.001;0.085	t|1e1.2o5|2e2.1o5|1e2.1o5|2e3.2o4|1e3.2o4|1e3.1o4|1e4.1o1	TRUE	TRUE	TRUE	7	5	1;1;0;1;0;1;1	1	-	3656951-3662171;3656966-3659368;3656951-3659368;3656966-3658994;3656951-3658994;3656951-3658935;3656951-3657784	3656797-3656966;3657784-3657937;3658935-3659081;3659368-3659547;3661945-3662802
32	TMED5	gene:ENSG00000117500	ENSG00000117500:t:93621593-93621664	-0.0010910767302189338;-0.00010557547612079171;-0.5309100197902837;0.535623705108182	0.028959798924818057;0.0008293015840195221;0.9652000044643839;0.9599651025966741	0.8542875356979066;0.9877481635709414;0.027537739397585526;0.031955730513818614	0.133;0.016;0.663;0.188	0.126;0.015;0.126;0.733	t|1e1.7o8|2e1.3o8|1e1.3o8|i	TRUE	TRUE	FALSE	4	2	1;1;0;0	1	-	93621641-93621974;93621664-93621857;93621641-93621857;93621664-93621665	93621593-93621664;93621665-93621800;93621801-93622040	93621665-93621800
33	OBSCN	gene:ENSG00000154358	ENSG00000154358:s:228486171-228486418	0.3087426428177064;-0.475937698415246;0.06703125828972173;-0.00037535618666417585;-0.00037535618666417585;-0.00037535618666417585	0.9412743291855104;0.9745596452146881;0.2639732270059651;0.0004018844976626637;0.0004018844976626637;0.0004018844976626637	0.04374606232333098;0.02006640852390429;0.48454830091452783;0.9943604473784194;0.9943604473784194;0.9943604473784194	0.012;0.940;0.012;0.012;0.012;0.012	0.348;0.463;0.176;0.005;0.005;0.005	s|1e1.1o1|1e2.1o2|1e3.1o5|1e4.1o2|1e5.1o4|1e6.1o8	FALSE	FALSE	TRUE	6	7	0;1;1;1;1;1	1	+	228486418-228486960;228486418-228487583;228486418-228491376;228486418-228492004;228486418-228492824;228486418-228494073	228486171-228486418;228486960-228487223;228487583-228487846;228491376-228491639;228492004-228492267;228492824-228493122;228494073-228494339
34	PDE4DIP	gene:ENSG00000178104	ENSG00000178104:t:144881430-144882033	-0.004607567894125592;-5.5170989779468884e-05;-0.01710592127323525;-0.014111698743786275;0.24086910989182148;-0.007634140420571587	0.0021327760097586156;8.544817607232241e-06;0.02420395976842308;0.04984479790194948;0.9807667061321534;0.037950267483585765	0.9530377521108813;0.9992587707689898;0.8191086705060676;0.8200795120804532;0.0033532010992147155;0.8379331971493716	0.050;0.004;0.097;0.329;0.004;0.516	0.002;0.002;0.029;0.242;0.265;0.457	t|2e1.1o3|1e1.1o3|2e2.1o3|1e2.1o3|2e3.1o2|1e3.1o2	FALSE	TRUE	TRUE	6	4	1;1;1;0;1;0	1	-	144882033-144886097;144881622-144886097;144882033-144882776;144881622-144882776;144882033-144882446;144881622-144882446	144881430-144882033;144882446-144882701;144882776-144882881;144886097-144886329
35	XRRA1	gene:ENSG00000166435	ENSG00000166435:t:74632259-74632392	-0.015958247278118273;-0.00017150522615868392;-0.00017150522615868392;-0.29789045940227615;0.4898936243079553;-0.00017150522615868392	0.03258060013779877;0.000238605346400435;0.000238605346400435;0.7514496323336738;0.9990951849738596;0.000238605346400435	0.8519012035903162;0.9951224681117175;0.9951224681117175;0.2007904237396706;0.0006430178640577121;0.9951224681117175	0.114;0.009;0.009;0.851;0.009;0.009	0.006;0.006;0.006;0.470;0.506;0.006	t|1e1.1o5|1e2.6o7|1e2.2o7|1e3.1o2|1e4.2o2|1e4.1o2	TRUE	FALSE	TRUE	6	5	0;1;1;1;0;1	11	-	74632392-74647929;74632392-74644870;74632392-74644846;74632392-74641345;74632392-74638436;74632392-74638425	74632259-74632392;74638425-74638533;74641345-74641417;74644816-74644953;74647929-74648113
36	XRRA1	gene:ENSG00000166435	ENSG00000166435:s:74641345-74641417	0.5059793316797212;-0.5059793316797198	0.9822748717425206;0.9822748717425207	0.01355352249419235;0.013553522494192394	0.132;0.868	0.640;0.360	s|1e1.1o1|1e2.1o6	FALSE	FALSE	TRUE	2	3	0;1	11	-	74638533-74641345;74632392-74641345	74632259-74632392;74638425-74638533;74641345-74641417
37	SLC22A5	gene:ENSG00000197375	ENSG00000197375:s:131719839-131720012	0.07586038562843782;0.021535452074292142;-0.2628791593660491;-2.913953466179252e-05;-2.913953466179252e-05;-2.913953466179252e-05;-2.913953466179252e-05;-2.913953466179252e-05	0.2883829748217418;0.03361886498428847;0.9637098899395015;2.2171010130819833e-05;2.2171010130819833e-05;2.2171010130819833e-05;2.2171010130819833e-05;2.2171010130819833e-05	0.5673519151544768;0.7887141360819627;0.009024598168830833;0.9987572647817446;0.9987572647817446;0.9987572647817446;0.9987572647817446;0.9987572647817446	0.681;0.004;0.289;0.004;0.004;0.004;0.004;0.004	0.883;0.099;0.003;0.003;0.003;0.003;0.003;0.003	s|1e1.1o4|2e1.1o4|3e1.1o4|1e1.4o4|1e2.2o8|2e2.2o8|3e2.2o8|1e3.1o2	TRUE	TRUE	TRUE	8	4	0;1;1;1;1;1;1;1	5	+	131719993-131721020;131720006-131721020;131720012-131721020;131719993-131721068;131719993-131722717;131720006-131722717;131720012-131722717;131719993-131724613	131719839-131720012;131721020-131721191;131722551-131722843;131724613-131724713
38	TNRC6B	gene:ENSG00000100354	ENSG00000100354:t:40669429-40669607	-0.0001843961926271563;-0.35274296735149135;0.3638127620337981;-0.0001843961926271563	5.4300751285732124e-05;0.9696714804980205;0.9824786371476866;5.4300751285732124e-05	0.9976948534453429;0.020851936321634512;0.011672188987650463;0.9976948534453429	0.008;0.917;0.068;0.008	0.004;0.567;0.426;0.004	t|1e1.1o3|1e2.1o3|1e3.1o1|1e4.1o1	FALSE	FALSE	TRUE	4	5	1;0;0;1	22	+	40658177-40669429;40663040-40669429;40666284-40669429;40667227-40669429	nan-40667227;40657836-40658177;40660692-40663040;40666126-40666284;40669429-40669607
39	SEC24B-AS1	gene:ENSG00000247950	ENSG00000247950:s:110352848-110352902	-0.4702564681250324;3.1691313538199275e-05;3.1691313538199275e-05;0.4506449504687628;3.1691313538199275e-05;3.1691313538199275e-05	0.9908689166720271;0.00019173590821489986;0.00019173590821489986;0.9974336502798151;0.00019173590821489986;0.00019173590821489986	0.006345934100535189;0.9955005605154505;0.9955005605154505;0.0012738372277201107;0.9955005605154505;0.9955005605154505	0.967;0.007;0.007;0.007;0.007;0.007	0.496;0.008;0.008;0.464;0.008;0.008	s|1e1.2o2|1e1.1o2|1e2.4o5|1e2.2o5|1e3.1o3|1e4.1o5	FALSE	TRUE	TRUE	6	5	0;0;1;0;1;1	4	-	110351936-110352848;110351916-110352848;110335594-110352848;110335589-110352848;110326929-110352848;110317435-110352848	110317350-110317435;110326806-110326929;110335414-110335594;110351119-110351936;110352848-110352902
40	KLC1	gene:ENSG00000126214	ENSG00000126214:t:104153418-104153548	-1.4327922033839883e-06;0.34329160519161933;-0.11554540024095189;-1.4327922033839883e-06;-0.0868842144075826;-1.4327922033839883e-06	1.07046892201721e-08;0.9942699517119646;0.48404214888689834;1.07046892201721e-08;0.37895826803447635;1.07046892201721e-08	0.9999766435054092;0.0025686824340125465;0.3642156884385679;0.9999766435054092;0.42238117491285476;0.9999766435054092	0.002;0.205;0.454;0.002;0.329;0.002	0.001;0.540;0.277;0.001;0.174;0.001	t|1e1.1o18|1e1.2o18|1e1.10o18|1e2.1o2|1e3.1o8|1e4.1o2	TRUE	FALSE	TRUE	6	5	1;0;0;1;1;1	14	+	104145824-104153418;104145855-104153418;104145882-104153418;104149725-104153418;104151373-104153418;104151891-104153418	104145646-104146135;104149706-104149802;104151323-104151653;104151724-104151891;104153418-104153548
41	GANC	gene:ENSG00000214013	ENSG00000214013:s:42570656-42570790	-0.00010770811012149271;-0.00010770811012149271;-0.21304114322666112;-0.00010770811012149271;-0.00010770811012149271;-0.023037170261358368;-0.010572043666466345;-0.003079473216544812;0.5606839157041278;-0.00010770811012149271;-0.00010770811012149271	4.174501387853473e-05;4.174501387853473e-05;0.635786908229729;4.174501387853473e-05;4.174501387853473e-05;0.05298115641806024;0.014331708559503553;0.002254442489736046;0.9999429439064385;4.174501387853473e-05;4.174501387853473e-05	0.9988599733507451;0.9988599733507451;0.28945915396045785;0.9988599733507451;0.9988599733507451;0.7840685828134756;0.8970502229430323;0.9690393590275808;3.4959419409912814e-05;0.9988599733507451;0.9988599733507451	0.004;0.004;0.670;0.004;0.004;0.129;0.087;0.045;0.045;0.004;0.004	0.001;0.001;0.368;0.001;0.001;0.025;0.001;0.001;0.593;0.001;0.001	s|2e1.1o1|2e2.1o5|2e2.2o5|2e2.4o5|2e2.5o5|2e3.1o3|2e3.3o3|1e4.1o9|2e4.1o9|2e5.1o2|2e6.1o3	TRUE	TRUE	TRUE	11	7	1;1;0;1;1;1;1;1;0;1;1	15	+	42570788-42571391;42570788-42573065;42570788-42573115;42570788-42573120;42570788-42573161;42570788-42575809;42570788-42576284;42570783-42579889;42570788-42579889;42570788-42589809;42570788-42598744	42570656-42570790;42571391-nan;42573065-42573331;42575809-42576587;42579889-42580016;42589809-42589854;42598744-42598825
42	CKAP2	gene:ENSG00000136108	ENSG00000136108:t:53035031-53035109	0.3496498405527633;-0.337888527795847;-0.00039502083656745636;-0.00039502083656745636	0.9966235621074303;0.9788809124081311;0.00018648536498684266;0.00018648536498684266	0.00223188171359513;0.014671666796615135;0.995888271531277;0.995888271531277	0.011;0.967;0.011;0.011	0.366;0.632;0.003;0.003	t|1e1.1o6|2e1.1o6|3e1.1o6|2e2.1o1	FALSE	TRUE	TRUE	4	3	0;0;1;1	13	+	53030742-53035031;53030742-53035034;53030742-53035037;53031174-53035034	53030658-53030742;53031054-53031174;53035031-53035109
43	CKAP2	gene:ENSG00000136108	ENSG00000136108:s:53030658-53030742	-0.00016655302305230185;-0.00016655302305230185;0.3451472161842714;-0.06592709687517094;-0.00016655302305230185;-0.07492356861227087	5.3045219968882835e-05;5.3045219968882835e-05;0.9992362862129035;0.25177178382725024;5.3045219968882835e-05;0.28527100625811214	0.998249942418249;0.998249942418249;0.0004369223821177363;0.613444039535589;0.998249942418249;0.4639681570256651	0.006;0.006;0.006;0.792;0.006;0.185	0.002;0.002;0.363;0.609;0.002;0.023	s|1e1.1o2|1e1.2o2|1e2.1o4|1e2.2o4|1e2.4o4|1e3.1o2	FALSE	TRUE	TRUE	6	4	1;1;0;0;1;0	13	+	53030742-53031054;53030742-53031073;53030742-53035031;53030742-53035034;53030742-53035037;53030742-53035193	53030658-53030742;53031054-53031174;53035031-53035109;53035193-53036061
44	AC002467.7	gene:ENSG00000241764	ENSG00000241764:t:107383262-107383848	0.13009020206031421;0.00010474900595536383;-0.006710988881179009;-0.3789178527511145;-4.548045554565197e-05;0.12551592958240634	0.5969052332520232;9.549623871581308e-06;0.022018300826104814;0.9976489851924351;5.401293919676719e-06;0.4665172259671379	0.2511316530156458;0.997899202409394;0.8618883788569301;0.0009048194336522819;0.9994346591588406;0.41290341210098513	0.046;0.004;0.216;0.449;0.004;0.289	0.226;0.014;0.172;0.074;0.002;0.508	t|1e1.1o2|1e2.1o1|1e3.4o4|1e3.3o4|1e3.2o4|1e3.1o4	TRUE	FALSE	TRUE	6	4	0;0;1;0;1;1	7	-	107383848-107384818;107383848-107384504;107383848-107384386;107383848-107384378;107383848-107384342;107383848-107383930	107383262-107383848;107383930-107384495;107384504-107384573;107384818-107385026
45	CCNT2-AS1	gene:ENSG00000224043	ENSG00000224043:t:135626514-135626611	-0.4378047104992313;-0.00017820249054944926;0.6769551703931072;-0.00017820249054944926;-0.16200806869246195;0.003065425654545964	0.974304630370013;9.105207344862044e-05;0.9999986079017171;9.105207344862044e-05;0.5513094182890318;0.0011931135867486063	0.018161818098549;0.9973578980269554;7.761339830588782e-07;0.9973578980269554;0.33876905362765464;0.9643244111657967	0.590;0.007;0.049;0.007;0.340;0.007	0.149;0.003;0.712;0.003;0.087;0.045	t|1e1.1o4|1e2.1o2|1e3.2o5|1e3.1o5|1e4.1o1|1e5.1o1	TRUE	FALSE	TRUE	6	6	0;1;0;1;0;1	2	-	135626611-135676133;135626611-135667634;135626611-135635090;135626611-135634987;135626611-135633677;135626611-135630137	135626514-135626611;135630137-nan;135633677-135633708;135634987-135635213;135667634-135667644;135676133-135676280
46	NUTM2A-AS1	gene:ENSG00000223482	ENSG00000223482:s:89005872-89005993	0.07118143040723496;-1.7146343010440795e-06;-1.7146343010440795e-06;-1.7146343010440795e-06;-1.7146343010440795e-06;-1.7146343010440795e-06;0.0001811694057572556;0.07230968468487284;-1.7146343010440795e-06;-1.7146343010440795e-06;0.0009209532469345556;0.004524292010320303;-1.7146343010440795e-06;-1.7146343010440795e-06;-0.35244035036477706;-1.7146343010440795e-06;-1.7146343010440795e-06;-1.714634…	0.2746187273338218;1.5779066839314907e-07;1.5779066839314907e-07;1.5779066839314907e-07;1.5779066839314907e-07;1.5779066839314907e-07;7.648936988007526e-06;0.309581456676799;1.5779066839314907e-07;1.5779066839314907e-07;7.117097060048257e-05;0.0033238046068376375;1.5779066839314907e-07;1.5779066839314907e-07;0.9984624247918709;1.5779066839314907e-07;1.5779066839314907e-07;1.5779066839314907e-07;0…	0.5803127118154169;0.9999481962754909;0.9999481962754909;0.9999481962754909;0.9999481962754909;0.9999481962754909;0.9980768839788547;0.45527002755334056;0.9999481962754909;0.9999481962754909;0.9905108801009167;0.9067578498695167;0.9999481962754909;0.9999481962754909;0.0004950721054287621;0.9999481962754909;0.9999481962754909;0.9999481962754909;0.9840931230989286;0.9999481962754909;0.9999481962754…	0.462;0.001;0.001;0.001;0.001;0.001;0.001;0.047;0.001;0.001;0.001;0.047;0.001;0.001;0.398;0.001;0.001;0.001;0.031;0.001;0.001;0.001;0.001	0.643;0.001;0.001;0.001;0.001;0.001;0.014;0.185;0.001;0.001;0.027;0.067;0.001;0.001;0.054;0.001;0.001;0.001;0.001;0.001;0.001;0.001;0.001	s|1e1.4o6|1e1.3o6|1e1.2o6|1e1.1o6|1e2.1o1|1e3.1o1|1e4.5o7|1e4.1o7|1e5.1o1|1e6.1o1|1e7.1o1|1e8.2o4|1e8.1o4|1e9.1o1|1e10.1o2|1e11.1o1|1e12.1o2|1e13.1o2|1e14.1o5|1e15.1o2|1e16.1o2|1e17.1o2|1e18.1o1	FALSE	TRUE	TRUE	23	19	0;1;1;1;1;1;0;0;1;0;1;1;1;1;1;1;1;1;0;1;1;1;1	10	-	89005612-89005872;89005611-89005872;89004846-89005872;89004507-89005872;89000288-89005872;88999626-89005872;88998629-89005872;88998606-89005872;88996472-89005872;88995672-89005872;88984300-89005872;88975930-89005872;88975915-89005872;88974035-89005872;88968269-89005872;88968266-89005872;88967565-89005872;88966400-89005872;88963693-89005872;88962837-89005872;88952602-89005872;88949781-89005872;888…	nan-88966400;nan-88967565;nan-88968266;nan-88968269;nan-88974035;nan-88984300;nan-88996472;nan-88999626;nan-89000288;88880794-88880804;88949771-88949781;88952592-88952602;88962827-88962837;88963632-88963693;88975751-88975955;88995384-88995672;88998424-88998629;89003889-89005612;89005872-89005993
47	GEMIN4	gene:ENSG00000179409	ENSG00000179409:t:650681-652591	-4.2575857542733666e-05;-4.2575857542733666e-05;0.4407354758212215;-4.2575857542733666e-05;-4.2575857542733666e-05;0.024739858731980764;-4.2575857542733666e-05;-0.4987193877675393	5.379693076347399e-06;5.379693076347399e-06;0.9985995716975012;5.379693076347399e-06;5.379693076347399e-06;0.028212597813764194;5.379693076347399e-06;0.9999801617573264	0.9995461371278073;0.9995461371278073;0.0006984230178016812;0.9995461371278073;0.9995461371278073;0.740041248957848;0.9995461371278073;5.774922140378003e-06	0.003;0.003;0.375;0.003;0.003;0.026;0.003;0.581	0.001;0.001;0.808;0.001;0.001;0.091;0.001;0.095	t|2e1.1o1|2e2.1o4|2e3.1o8|1e3.1o8|2e4.1o2|2e5.1o2|3e6.1o2|2e6.1o2	FALSE	TRUE	TRUE	8	7	0;1;0;1;1;1;1;0	17	-	651272-657199;651272-655858;651272-655373;651271-655373;651272-654891;651272-653237;651699-653054;651272-653054	650681-652591;653054-653161;653237-653488;654891-655278;655373-655501;655858-656016;657199-657239
48	PHKB	gene:ENSG00000102893	ENSG00000102893:s:47495034-47495415	0.003457310975807766;-9.288548145266959e-06;0.3840227452048351;-9.288548145266959e-06;-0.3282169245739477;0.001459619585193632;0.012416517998565853;-9.288548145266959e-06;-0.1438172188939127;-9.288548145266959e-06;-9.288548145266959e-06;-9.288548145266959e-06;-9.288548145266959e-06	0.0003839303020255974;6.326679767457209e-07;0.9999986996549736;6.326679767457209e-07;0.939199190384007;8.93898574683623e-05;0.004215412738591081;6.326679767457209e-07;0.5830357927039735;6.326679767457209e-07;6.326679767457209e-07;6.326679767457209e-07;6.326679767457209e-07	0.9644430451112311;0.9998813345588295;6.655129251620228e-08;0.9998813345588295;0.04139282560783897;0.9848570611641366;0.8732101515269268;0.9998813345588295;0.2797349522999971;0.9998813345588295;0.9998813345588295;0.9998813345588295;0.9998813345588295	0.001;0.001;0.001;0.001;0.682;0.001;0.001;0.001;0.305;0.001;0.001;0.001;0.001	0.045;0.001;0.399;0.001;0.349;0.034;0.067;0.001;0.101;0.001;0.001;0.001;0.001	s|2e1.2o2|2e2.2o10|2e2.3o10|1e2.5o10|2e2.5o10|3e2.5o10|2e2.9o10|2e2.10o10|2e3.1o2|2e4.1o2|2e5.1o3|3e5.1o3|2e6.1o3	TRUE	TRUE	TRUE	13	7	0;1;0;1;0;1;1;1;0;1;1;1;1	16	+	47495337-47496252;47495337-47497009;47495337-47497793;47495291-47497810;47495337-47497810;47495415-47497810;47495337-47497815;47495337-47497835;47495337-47531310;47495337-47581344;47495337-47644737;47495415-47644737;47495337-47682444	47495034-47495415;47496023-47496363;47496578-47497904;47531310-47531399;47581344-47581459;47644737-47644831;47682444-47682527
49	BCL2L1	gene:ENSG00000171552	ENSG00000171552:t:30309458-30310151	-0.012015340351995378;0.013039639772458226;-2.3741799077980612e-07;-0.012329474938759416;0.010695653114355353;-0.04841916859329966;-0.009423654726056547;-0.05629182118161482;-2.3741799077980612e-07;-2.3741799077980612e-07;-2.3741799077980612e-07;-2.3741799077980612e-07;0.0024207524877709733;0.27658645728924103	0.0033508094589505544;0.01896593491483594;7.82502652558712e-09;0.003754286999645115;0.003944606446446145;0.17806753902874717;0.01561221895186448;0.21305675115185357;7.82502652558712e-09;7.82502652558712e-09;7.82502652558712e-09;7.82502652558712e-09;0.00015881032704563513;0.9547648880018874	0.8773575600967918;0.8453656072576771;0.9999857806670848;0.8741924083415679;0.8754381911910011;0.5856232008533523;0.8663502681135268;0.5231681129495851;0.9999857806670848;0.9999857806670848;0.9999857806670848;0.9999857806670848;0.9752172227838151;0.02309166784112587	0.063;0.083;0.001;0.063;0.032;0.203;0.173;0.190;0.001;0.001;0.001;0.001;0.001;0.184	0.001;0.133;0.001;0.001;0.068;0.087;0.128;0.068;0.001;0.001;0.001;0.001;0.040;0.463	t|4e1.5o6|3e1.5o6|4e1.3o6|3e1.3o6|4e1.1o6|3e1.1o6|4e2.1o2|3e2.1o2|3e3.6o6|4e3.4o6|3e3.4o6|4e3.1o6|3e3.1o6|i	TRUE	TRUE	TRUE	14	4	0;0;1;1;0;0;0;0;1;0;1;1;1;0	20	-	30310151-30311667;30310133-30311667;30310151-30311651;30310133-30311651;30310151-30311538;30310133-30311538;30310151-30310421;30310133-30310421;30310133-30310280;30310151-30310247;30310133-30310247;30310151-30310220;30310133-30310220;30310151-30310152	30309458-30310151;30310152-30310219;30310220-30310400;30310421-30310901;30311538-30311792	30310152-30310219
50	CCDC77	gene:ENSG00000120647	ENSG00000120647:t:514677-514730	0.43357479920095543;0.0026287403249885717;0.016380157432800295;-3.584960029261523e-05;-0.06874228129080759;-0.4135193373909463;-3.584960029261523e-05;-3.584960029261523e-05;-3.584960029261523e-05;-3.584960029261523e-05	0.9265524479901607;0.0020242134247829306;0.06671312580250416;0.00010285032834006832;0.24582776971888226;0.9670743899129609;0.00010285032834006832;0.00010285032834006832;0.00010285032834006832;0.00010285032834006832	0.05758848476492488;0.9706629175037039;0.8029223139390721;0.9974516316509777;0.5110809272650643;0.023512629265767027;0.9974516316509777;0.9974516316509777;0.9974516316509777;0.9974516316509777	0.186;0.005;0.141;0.005;0.186;0.459;0.005;0.005;0.005;0.005	0.644;0.044;0.244;0.004;0.004;0.044;0.004;0.004;0.004;0.004	t|1e1.1o10|1e1.7o10|1e2.1o6|1e2.5o6|1e3.1o7|1e3.2o7|1e3.5o7|1e3.6o7|1e3.7o7|1e4.1o1	TRUE	FALSE	TRUE	10	5	0;1;1;1;1;0;1;1;1;1	12	+	498652-514677;498693-514677;504387-514677;504407-514677;510798-514677;510850-514677;510888-514677;510956-514677;511100-514677;513779-514677	nan-513779;498514-498828;504290-504407;510742-511100;514677-514730
51	CCDC77	gene:ENSG00000120647	ENSG00000120647:t:520913-521144	0.32321582525737497;-0.00017567783624304059;-0.00017567783624304059;-0.00449025121317182;-0.14322665154179248;-0.00017567783624304059;-0.00017567783624304059	0.9760882711013823;0.00015471307769931606;0.00015471307769931606;0.05326317883014822;0.423601861249031;0.00015471307769931606;0.00015471307769931606	0.01422824654049643;0.9965765484474741;0.9965765484474741;0.8214636442009197;0.47632535114158814;0.9965765484474741;0.9965765484474741	0.007;0.007;0.007;0.481;0.483;0.007;0.007	0.355;0.004;0.004;0.429;0.204;0.004;0.004	t|1e1.1o10|1e2.1o6|1e3.2o7|1e4.1o2|1e5.1o2|1e6.1o2|1e6.2o2	TRUE	FALSE	TRUE	7	7	0;1;1;0;0;1;1	12	+	498652-520913;504387-520913;510850-520913;514730-520913;518587-520913;519644-520913;520027-520913	498514-498828;504290-504407;510742-511100;514677-514730;518534-518587;519454-520027;520913-521144
52	SIN3B	gene:ENSG00000127511	ENSG00000127511:t:16974491-16974609	-4.932684608557112e-05;-4.932684608557112e-05;-4.932684608557112e-05;-0.2796914430395478;-0.004631440151951915;-0.0007214057691837043;-4.932684608557112e-05;-4.932684608557112e-05;0.3506271521623363	8.915800439984605e-06;8.915800439984605e-06;8.915800439984605e-06;0.8359910814356377;0.0250624180618408;0.0005022712534943148;8.915800439984605e-06;8.915800439984605e-06;0.9999272396005412	0.9994293080032065;0.9994293080032065;0.9994293080032065;0.1200778443769589;0.8574206212708538;0.9778275036572932;0.9994293080032065;0.9994293080032065;2.494944951399332e-05	0.003;0.003;0.003;0.692;0.259;0.028;0.003;0.003;0.003	0.001;0.001;0.001;0.385;0.225;0.026;0.001;0.001;0.363	t|1e1.1o6|1e2.1o3|1e3.1o6|1e4.1o3|1e5.1o5|1e5.3o5|1e5.4o5|1e6.2o3|1e6.3o3	TRUE	FALSE	TRUE	9	7	1;1;1;0;0;1;1;1;1	19	+	16962345-16974491;16963969-16974491;16965072-16974491;16973370-16974491;16973790-16974491;16973835-16974491;16973917-16974491;16974112-16974491;16974173-16974491	16962223-16962679;16963880-16963969;16964954-16966556;16973163-16973370;16973695-16973917;16973980-16974173;16974491-16974609
53	BAIAP2	gene:ENSG00000175866	ENSG00000175866:s:79082275-79082627	-0.35125958884103375;-8.188329387464207e-05;0.49684752113016717;-0.028119281938404232;-6.290630994601686e-05	0.9163862596219738;0.0001095018034843694;0.9922279230789405;0.08270508774168706;8.11514105881459e-05	0.060906107718784686;0.9962066617495644;0.005471858738830005;0.7380081067217936;0.9971105312268688	0.463;0.008;0.365;0.156;0.006	0.097;0.006;0.855;0.037;0.005	s|1e1.1o2|1e2.1o2|1e3.1o2|1e4.1o4|i	FALSE	FALSE	TRUE	5	5	0;1;0;0;0	17	+	79082309-79082768;79082309-79083823;79082309-79084714;79082309-79089570;79082627-79082628	79082275-79082627;79082628-79082767;79082768-79083187;79083823-79084312;79084714-79084759;79089570-79090025	79082628-79082767
54	PSMD5-AS1	gene:ENSG00000226752	ENSG00000226752:t:123609572-123609631	-6.267624969064908e-05;-6.267624969064908e-05;-6.267624969064908e-05;-6.267624969064908e-05;0.538854202117318;-6.267624969064908e-05;0.007148209254441687;0.0019521905044487353;-6.267624969064908e-05;-6.267624969064908e-05;-0.6356977977633804;-6.267624969064908e-05	7.55536398915258e-05;7.55536398915258e-05;7.55536398915258e-05;7.55536398915258e-05;0.9949716752838375;7.55536398915258e-05;0.0070721194529386605;0.0011369917194494754;7.55536398915258e-05;7.55536398915258e-05;0.9994448902143204;7.55536398915258e-05	0.9980781469406929;0.9980781469406929;0.9980781469406929;0.9980781469406929;0.003684654795578812;0.9980781469406929;0.926149688087736;0.9776578935669307;0.9980781469406929;0.9980781469406929;0.0003901470736978885;0.9980781469406929	0.004;0.004;0.004;0.004;0.099;0.004;0.004;0.004;0.004;0.004;0.861;0.004	0.003;0.003;0.003;0.003;0.624;0.003;0.071;0.037;0.003;0.003;0.244;0.003	t|1e1.1o1|1e2.2o5|1e3.1o5|1e4.1o7|1e4.2o7|1e4.6o7|1e4.7o7|1e5.1o4|1e5.2o4|1e5.4o4|1e6.1o2|1e6.2o2	TRUE	FALSE	TRUE	12	7	0;0;1;1;0;1;1;0;1;1;0;0	9	+	123604718-123609572;123605717-123609572;123607177-123609572;123607468-123609572;123607474-123609572;123607626-123609572;123607749-123609572;123608104-123609572;123608165-123609572;123608228-123609572;123609081-123609572;123609139-123609572	123604084-123604718;123605274-123605717;123606991-123607177;123607271-123607749;123607843-123608228;123608788-123609139;123609572-123609631
55	DPY19L4	gene:ENSG00000156162	ENSG00000156162:s:95751873-95752018	-2.390508884295736e-05;-2.390508884295736e-05;-2.390508884295736e-05;-2.390508884295736e-05;-0.5842276005204803;-2.390508884295736e-05;0.18591796359085364;-2.390508884295736e-05;-2.390508884295736e-05;0.2420399724823772;0.000892992811466903	1.2289597558997139e-05;1.2289597558997139e-05;1.2289597558997139e-05;1.2289597558997139e-05;0.9999865012988539;1.2289597558997139e-05;0.581149855718874;1.2289597558997139e-05;1.2289597558997139e-05;0.9573466510879561;0.00021519482849953795	0.999237323162936;0.999237323162936;0.999237323162936;0.999237323162936;6.3294760785925774e-06;0.999237323162936;0.33357539645693474;0.999237323162936;0.999237323162936;0.01018121014049672;0.989887400323248	0.002;0.002;0.002;0.002;0.620;0.002;0.354;0.002;0.002;0.002;0.002	0.002;0.002;0.002;0.002;0.047;0.002;0.646;0.002;0.002;0.269;0.025	s|3e1.1o1|3e2.1o1|3e3.1o1|3e4.1o2|3e4.2o2|3e5.1o1|3e6.1o4|3e6.4o4|3e7.1o5|3e7.2o5|3e7.4o5	FALSE	TRUE	TRUE	11	8	1;1;1;0;0;1;0;1;1;1;1	8	+	95752018-95752255;95752018-95752704;95752018-95755928;95752018-95756571;95752018-95756713;95752018-95765714;95752018-95768264;95752018-95768269;95752018-95773905;95752018-95773928;95752018-95773930	95751873-95752018;95752255-nan;95752704-nan;95755928-nan;95756571-95757312;95765714-95765986;95768264-95768387;95773905-95774062
56	PRKY	gene:ENSG00000099725	ENSG00000099725:s:7193947-7194210	-8.383049059527576e-05;0.10236861683968221;-2.398320171172264e-05;-8.383049059527576e-05;-8.383049059527576e-05;-8.383049059527576e-05;0.12738223264003637;-8.383049059527576e-05;-8.383049059527576e-05;-0.4423205194552483;0.004887895371737043;-8.383049059527576e-05;-8.383049059527576e-05;-8.383049059527576e-05	3.7211543934005266e-05;0.3752224512511122;0.03149986300352352;3.7211543934005266e-05;3.7211543934005266e-05;3.7211543934005266e-05;0.6176914245985926;3.7211543934005266e-05;3.7211543934005266e-05;0.9796410217097237;0.001658701815685627;3.7211543934005266e-05;3.7211543934005266e-05;3.7211543934005266e-05	0.9989928948473052;0.505304582246135;0.8470485009289425;0.9989928948473052;0.9989928948473052;0.9989928948473052;0.15074971436536003;0.9989928948473052;0.9989928948473052;0.013966794063200227;0.9483043105603178;0.9989928948473052;0.9989928948473052;0.9989928948473052	0.003;0.134;0.264;0.003;0.003;0.003;0.003;0.003;0.003;0.574;0.003;0.003;0.003;0.003	0.001;0.351;0.255;0.001;0.001;0.001;0.184;0.001;0.001;0.137;0.052;0.001;0.001;0.001	s|1e1.1o1|1e2.1o3|1e2.2o3|1e3.1o1|1e4.1o1|1e5.1o2|1e5.2o2|1e6.1o1|1e7.1o1|1e8.1o11|1e9.1o6|1e10.1o5|1e11.1o1|1e12.1o1	FALSE	TRUE	TRUE	14	13	1;1;1;1;1;1;1;1;1;0;1;1;1;1	Y	+	7194210-7194650;7194210-7196068;7194210-7196072;7194210-7196431;7194210-7197416;7194210-7199915;7194210-7199919;7194210-7201000;7194210-7208004;7194210-7209156;7194210-7224176;7194210-7235397;7194210-7243753;7194210-7369050	7193947-7194210;7194650-7194907;7196068-7196189;7196431-nan;7197416-nan;7199915-7200036;7201000-7201149;7208004-7208649;7209156-7209275;7224176-7224271;7235397-7235474;7243753-7243763;7369050-7369060
57	RP5-886K2.3	gene:ENSG00000236810	ENSG00000236810:t:24098396-24098656	-0.5057991332077463;0.05114334325973107;-0.004772437743811294;0.42088512566749126	0.9962525854677747;0.15028420744435841;0.023602374132439707;0.9916456430326763	0.002535950122726449;0.530151381104466;0.8610569348552172;0.0055931978783327115	0.723;0.009;0.188;0.078	0.228;0.131;0.147;0.495	t|1e1.1o4|1e2.3o3|1e2.2o3|1e2.1o3	TRUE	FALSE	TRUE	4	3	1;1;1;0	1	-	24098656-24104689;24098656-24098797;24098656-24098762;24098656-24098758	24098396-24098656;24098758-24098916;24104689-24104777
58	AC009120.6	gene:ENSG00000259972	ENSG00000259972:s:74366465-74366511	0.006378149440306489;0.3408719975134128;-0.004568426264125627;-0.3409289537913979;-0.002692529655106382;-7.282347688149467e-06;-7.282347688149467e-06;-7.282347688149467e-06;-7.282347688149467e-06;-7.282347688149467e-06;-7.282347688149467e-06;0.002861819596738472;-7.282347688149467e-06;0.00019453550830467176;0.0009921491114866837;-0.20484596604546185;0.06914038645754811;-7.282347688149467e-06	0.0017490654876206485;0.9662636728260533;0.005676596521981693;0.9910103652481808;0.0006872243537318228;7.474281964917646e-07;7.474281964917646e-07;7.474281964917646e-07;7.474281964917646e-07;7.474281964917646e-07;7.474281964917646e-07;0.00043822283317452145;7.474281964917646e-07;9.615571144130788e-06;8.334887429663219e-05;0.8695188793046212;0.2964460987448327;7.474281964917646e-07	0.9347394537236353;0.021607827123956244;0.9011637467226145;0.003955551603407659;0.9724825153754884;0.9998764783411528;0.9998764783411528;0.9998764783411528;0.9998764783411528;0.9998764783411528;0.9998764783411528;0.9705616905926421;0.9998764783411528;0.9978118599245628;0.9896564567096338;0.055857010203963275;0.46965180059963546;0.9998764783411528	0.001;0.193;0.077;0.396;0.039;0.001;0.001;0.001;0.001;0.001;0.001;0.001;0.001;0.001;0.001;0.251;0.039;0.001	0.055;0.536;0.055;0.055;0.001;0.001;0.001;0.001;0.001;0.001;0.001;0.042;0.001;0.014;0.028;0.028;0.176;0.001	s|1e1.2o2|1e1.1o2|1e2.1o1|1e3.1o1|1e4.1o1|1e5.1o1|1e6.1o1|1e7.1o1|1e8.1o1|1e9.1o1|1e10.1o1|1e11.1o12|1e12.1o2|1e13.1o2|1e14.1o5|1e15.7o11|1e15.1o11|1e16.1o1	FALSE	TRUE	TRUE	18	17	1;1;1;1;1;1;1;1;1;1;1;1;1;1;0;1;1;1	16	-	74365606-74366465;74365601-74366465;74365363-74366465;74364702-74366465;74362320-74366465;74361587-74366465;74361279-74366465;74361117-74366465;74359686-74366465;74355420-74366465;74352877-74366465;74344032-74366465;74342464-74366465;74340577-74366465;74340319-74366465;74339478-74366465;74339469-74366465;74309142-74366465	nan-74342464;nan-74361117;nan-74361279;nan-74362320;nan-74364702;nan-74365363;74309132-74309142;74339100-74339478;74340153-74340319;74340504-74340577;74343897-74344205;74352781-74352877;74355268-74355420;74359493-74359686;74361466-74361587;74365485-74365606;74366465-74366511
59	METTL15	gene:ENSG00000169519	ENSG00000169519:s:28134865-28135151	1.032302637510267e-05;0.023878089023253772;-0.19740278504495765;1.032302637510267e-05;-0.10876915119528906;-0.06988998538344116;1.032302637510267e-05;1.032302637510267e-05;1.032302637510267e-05;0.40970089865177206;0.0006017429643323573	1.1385868395425094e-06;0.031519458878920985;0.9366689169944691;1.1385868395425094e-06;0.5231459888660029;0.24094841165084943;1.1385868395425094e-06;1.1385868395425094e-06;1.1385868395425094e-06;0.9982257422250637;8.210192250549072e-05	0.9998063906763098;0.7631119628576475;0.009462223220992216;0.9998063906763098;0.1596753533669203;0.3742788449741371;0.9998063906763098;0.9998063906763098;0.9998063906763098;0.000913492364124476;0.9937625248325822	0.001;0.001;0.225;0.001;0.163;0.132;0.001;0.001;0.001;0.475;0.001	0.002;0.096;0.002;0.002;0.002;0.002;0.002;0.002;0.002;0.870;0.021	s|1e1.1o1|1e2.1o1|1e3.1o3|1e3.3o3|1e4.1o3|1e5.1o1|1e6.1o1|1e7.1o1|1e8.1o1|1e9.1o7|1e10.1o3	FALSE	TRUE	TRUE	11	11	1;0;0;1;1;1;1;1;1;0;1	11	+	28135151-28138338;28135151-28143689;28135151-28145409;28135151-28145415;28135151-28147057;28135151-28156093;28135151-28178604;28135151-28179191;28135151-28184876;28135151-28232609;28135151-28311753	28134865-28135151;28138338-nan;28143689-28143727;28145409-28145469;28147057-28147218;28156093-nan;28178604-nan;28179191-nan;28184876-nan;28232609-28232745;28311753-28311944
60	EPHA1-AS1	gene:ENSG00000229153	ENSG00000229153:s:143112161-143112292	-1.2914521243520845e-05;-0.4096652110411212;-1.2914521243520845e-05;-1.2914521243520845e-05;-1.2914521243520845e-05;-1.2914521243520845e-05;0.001387424073973823;0.008389591994938203;-1.2914521243520845e-05;-1.2914521243520845e-05;0.11199818430138127;0.00035361522029278786;0.09624974900250242;-1.2914521243520845e-05;-1.2914521243520845e-05;0.0038571127272180685;-0.020363725107788316;0.001387424073…	2.1729129756772695e-06;0.9955577617463613;2.1729129756772695e-06;2.1729129756772695e-06;2.1729129756772695e-06;2.1729129756772695e-06;0.0001763646855345148;0.0034182958121164024;2.1729129756772695e-06;2.1729129756772695e-06;0.5313571798033705;0.0004019481829230985;0.4250493311326158;2.1729129756772695e-06;2.1729129756772695e-06;0.0008856261983506155;0.02725801126063727;0.0001763646855345148;2.172…	0.9997928796244281;0.0026457939196510294;0.9997928796244281;0.9997928796244281;0.9997928796244281;0.9997928796244281;0.9854822301300903;0.9142821878687425;0.9997928796244281;0.9997928796244281;0.1725363939910968;0.9758839788022342;0.232951609150519;0.9997928796244281;0.9997928796244281;0.9602981741043091;0.7989955619372973;0.9854822301300903;0.9997928796244281	0.001;0.868;0.001;0.001;0.001;0.001;0.001;0.001;0.001;0.001;0.001;0.023;0.001;0.001;0.001;0.001;0.090;0.001;0.001	0.001;0.459;0.001;0.001;0.001;0.001;0.032;0.062;0.001;0.001;0.169;0.032;0.160;0.001;0.001;0.047;0.001;0.032;0.001	s|1e1.1o3|1e1.2o3|1e1.3o3|1e2.1o1|1e3.1o1|1e4.1o1|1e5.1o1|1e6.1o1|1e7.1o1|1e8.1o1|1e9.1o1|1e10.1o1|1e11.1o1|1e12.1o1|1e13.1o2|1e14.1o1|1e15.1o5|1e16.1o3|1e17.1o1	FALSE	TRUE	TRUE	19	18	1;0;1;1;1;1;1;1;1;1;1;1;1;0;1;1;1;1;1	7	+	143112292-143112463;143112292-143112630;143112292-143112632;143112292-143116169;143112292-143126549;143112292-143126963;143112292-143131110;143112292-143149101;143112292-143192318;143112292-143192354;143112292-143193059;143112292-143193066;143112292-143196995;143112292-143201867;143112292-143210338;143112292-143210983;143112292-143215375;143112292-143216024;143112292-143295132	143112161-143112292;143112463-143112923;143116169-nan;143126549-nan;143126963-nan;143131110-nan;143149101-nan;143192318-nan;143192354-nan;143193059-nan;143193066-nan;143196995-nan;143201867-143201923;143210338-143210572;143210983-143211122;143215375-143215610;143216024-143220542;143295132-143295142
61	C14orf159	gene:ENSG00000133943	ENSG00000133943:t:91623974-91624034	0.0036818427180167557;-4.689076778380528e-07;-4.689076778380528e-07;-4.689076778380528e-07;0.007013293568764446;-0.22770658565028412;-4.689076778380528e-07;0.03693766294238308;-4.689076778380528e-07;-4.689076778380528e-07;-4.689076778380528e-07;-4.689076778380528e-07;-0.03519125412392763;0.0920578976640227;-4.689076778380528e-07	0.0008620239235237947;1.4386485613947544e-08;1.4386485613947544e-08;1.4386485613947544e-08;0.012157845301972663;0.9770623248916304;1.4386485613947544e-08;0.10854787121157383;1.4386485613947544e-08;1.4386485613947544e-08;1.4386485613947544e-08;1.4386485613947544e-08;0.10676421329971386;0.38212908077553887;1.4386485613947544e-08	0.9355413157084987;0.9999815161034876;0.9999815161034876;0.9999815161034876;0.879183560168671;0.004346355463054841;0.9999815161034876;0.6563526637745586;0.9999815161034876;0.9999815161034876;0.9999815161034876;0.9999815161034876;0.6742656755600889;0.45873010338560244;0.9999815161034876	0.034;0.001;0.001;0.001;0.134;0.256;0.001;0.067;0.001;0.001;0.001;0.001;0.185;0.321;0.001	0.052;0.001;0.001;0.001;0.167;0.021;0.001;0.167;0.001;0.001;0.001;0.001;0.083;0.503;0.001	t|2e1.1o4|2e2.1o5|2e3.1o1|1e4.1o10|2e4.1o10|2e5.1o6|2e6.1o11|2e6.3o11|2e6.11o11|2e7.1o1|2e8.1o3|2e9.1o1|2e10.1o5|2e11.1o2|2e12.1o1	TRUE	TRUE	TRUE	15	13	0;1;0;1;0;0;1;0;0;0;1;1;0;0;0	14	+	91527048-91623983;91527224-91623983;91574405-91623983;91580627-91623974;91580627-91623983;91580872-91623983;91581130-91623983;91581338-91623983;91581565-91623983;91591968-91623983;91595256-91623983;91605657-91623983;91611657-91623983;91614202-91623983;91615196-91623983	nan-91605657;91526677-91527048;91527176-91527224;91574330-91574405;91580357-91580627;91580714-91580872;91581014-91581565;91591883-91591968;91595090-91595256;91611565-91611934;91614122-91614202;91614574-91615196;91623974-91624034
62	THAP9-AS1	gene:ENSG00000251022	ENSG00000251022:s:83820976-83821376	0.02318406618382751;0.4338222701868813;-7.517032721054219e-05;0.03337590227313075;-0.6167157826187224;-7.517032721054219e-05	0.07794381263750805;0.9935919048170873;1.2928745123905867e-05;0.04555311507393674;0.9999999941490476;1.2928745123905867e-05	0.7664165715835614;0.004043452666394406;0.9991409400663692;0.666573057256623;6.493452442413172e-10;0.9991409400663692	0.107;0.254;0.004;0.004;0.629;0.004	0.201;0.675;0.002;0.093;0.026;0.002	s|2e1.1o1|2e2.1o2|3e3.1o4|2e3.1o4|2e4.1o5|2e5.1o1	TRUE	FALSE	TRUE	6	6	0;0;1;0;0;1	4	-	83820890-83821230;83819215-83821230;83816927-83821328;83816927-83821230;83816000-83821230;83803090-83821230	83803080-83803090;83814162-83816000;83816844-83816927;83818916-83819215;83820698-83820890;83820976-83821376
63	RRN3P2	gene:ENSG00000103472	ENSG00000103472:t:29102061-29102159	-8.772603940538078e-07;-0.026014588475592217;-0.0011208740884405077;-0.16761662000289335;0.2755290642332591;-0.00033301668208979827	9.76278016534904e-09;0.03026757848945883;0.00019415725287982312;0.7955986527414741;0.9776900142113015;5.820155412706683e-06	0.9999770975610927;0.7331973919829129;0.9623226614369693;0.08190620053511377;0.009124779476803919;0.9965774639004947	0.002;0.097;0.039;0.235;0.606;0.021	0.001;0.034;0.034;0.051;0.879;0.001	t|1e1.1o2|1e2.1o5|1e3.1o4|1e4.1o2|1e5.1o2|1e6.1o1	FALSE	FALSE	TRUE	6	7	1;1;0;1;0;1	16	+	29096089-29102061;29096597-29102061;29097596-29102061;29097952-29102061;29098724-29102061;29099852-29102061	29095960-29096089;29096538-29096597;29097178-29097596;29097859-29097952;29098655-29098724;29099730-29099852;29102061-29102159
64	FAM222B	gene:ENSG00000173065	ENSG00000173065:t:27093604-27094122	-2.6995355583734036e-05;0.327892003211852;-2.6995355583734036e-05;0.011850090908638;0.004883578867186438;-2.6995355583734036e-05;0.002346639139763732;-2.6995355583734036e-05;-0.45886906591386206;-2.6995355583734036e-05;-2.6995355583734036e-05;-2.6995355583734036e-05	3.4401370456301463e-06;0.9659474930531626;3.4401370456301463e-06;0.046467040811267915;0.010337295519679521;3.4401370456301463e-06;0.00015691503883465396;3.4401370456301463e-06;0.9999327941876098;3.4401370456301463e-06;3.4401370456301463e-06;3.4401370456301463e-06	0.9997105846041981;0.021995196327196233;0.9997105846041981;0.8238253929294208;0.8835218191626122;0.9997105846041981;0.9754419432382672;0.9997105846041981;1.486719947141335e-05;0.9997105846041981;0.9997105846041981;0.9997105846041981	0.002;0.118;0.002;0.278;0.095;0.002;0.002;0.002;0.490;0.002;0.002;0.002	0.001;0.441;0.001;0.345;0.115;0.001;0.039;0.001;0.049;0.001;0.001;0.001	t|1e1.1o2|1e2.2o8|2e2.1o8|1e3.1o7|1e4.2o5|1e4.1o5|1e5.1o2|1e6.1o1|1e7.1o3|1e8.1o1|1e9.1o1|1e10.1o1	TRUE	TRUE	TRUE	12	11	0;0;0;0;0;0;1;1;0;1;0;1	17	-	27093725-27181968;27093725-27169700;27093735-27169676;27093725-27161311;27093725-27139227;27093725-27139176;27093725-27133520;27093725-27131074;27093725-27117396;27093725-27106880;27093725-27104066;27093725-27100733	27093604-27094122;27100733-27100808;27104066-27104167;27106880-nan;27117396-27117461;27131074-nan;27133520-27133606;27139176-27139453;27161311-27161344;27169676-27169857;27181968-27182250
65	SLC38A9	gene:ENSG00000177058	ENSG00000177058:s:55007180-55007327	0.5392293776702645;-0.00013233277422093962;-0.00013233277422093962;-0.00013233277422093962;-0.00013233277422093962;-0.5651088708079989;0.0028192218772038714;-0.00013233277422093962	0.9971275599289439;6.46253146814833e-05;6.46253146814833e-05;6.46253146814833e-05;6.46253146814833e-05;0.9992500258347092;0.000984058039051314;6.46253146814833e-05	0.0019675409128052717;0.9981152904854355;0.9981152904854355;0.9981152904854355;0.9981152904854355;0.00047338167929744657;0.968032575035998;0.9981152904854355	0.291;0.005;0.005;0.005;0.005;0.672;0.005;0.005	0.822;0.002;0.002;0.002;0.002;0.123;0.043;0.002	s|2e1.1o4|1e1.1o4|2e2.1o1|2e3.3o4|2e3.1o4|2e4.2o8|1e4.2o8|2e5.1o7	TRUE	TRUE	TRUE	8	6	0;1;1;0;1;0;0;0	5	-	55000262-55007280;55000262-55007180;54999987-55007280;54998722-55007280;54998719-55007280;54993820-55007280;54993820-55007180;54968523-55007280	nan-54999987;54968391-54968650;54993674-54993822;54998567-54998722;55000150-55000262;55007180-55007327
66	ARFIP1	gene:ENSG00000164144	ENSG00000164144:t:153750746-153750878	-9.276197847835126e-06;-0.3928707454764886;-9.276197847835126e-06;0.3155108448285013;-9.276197847835126e-06;0.022861668086115044;-0.0031550222132638766;-9.276197847835126e-06	3.593815734862029e-06;0.9747767778148053;3.593815734862029e-06;0.8889363599128505;3.593815734862029e-06;0.02811660473151351;0.0009581621141443242;3.593815734862029e-06	0.9995236627510037;0.017110537502810108;0.9995236627510037;0.08088648362502397;0.9995236627510037;0.7719491692730783;0.9674763998668015;0.9995236627510037	0.002;0.629;0.002;0.316;0.002;0.002;0.043;0.002	0.002;0.234;0.002;0.656;0.002;0.093;0.002;0.002	t|2e1.1o1|2e2.1o18|1e2.6o18|2e2.6o18|2e3.1o1|2e4.1o1|2e5.1o1|2e6.1o1	TRUE	TRUE	TRUE	8	7	1;0;1;0;1;1;1;1	4	+	153700474-153750777;153701243-153750777;153701378-153750746;153701378-153750777;153706124-153750777;153712027-153750777;153728400-153750777;153730885-153750777	153700464-153700474;153701089-153701378;153706019-153706124;153711907-153712027;153728011-153728400;153730342-153730885;153750746-153750878
67	ZNF680	gene:ENSG00000173041	ENSG00000173041:s:64023303-64023484	0.0012298583364693002;-0.00020151224325312412;-0.00526839925033532;-0.23612650888233544;-0.00020151224325312412;0.317080970276411	0.000647069933116923;0.00015597208793514402;0.05201671519804557;0.7012213717992419;0.00015597208793514402;0.9786387044181956	0.9817234167357006;0.9963252995349104;0.8226443606065665;0.2270416744372442;0.9963252995349104;0.012530476901867706	0.008;0.008;0.579;0.389;0.008;0.008	0.031;0.004;0.531;0.083;0.004;0.342	s|1e1.1o1|1e2.1o1|1e3.1o2|1e4.1o2|2e5.1o9|1e5.1o9	TRUE	FALSE	TRUE	6	6	1;1;0;1;1;1	7	-	64021651-64023303;64007760-64023303;64004810-64023303;64004180-64023303;63982878-64023356;63982878-64023303	nan-64007760;63980262-63982909;64004085-64004180;64004684-64004810;64021324-64021651;64023303-64023484
68	TCEAL1	gene:ENSG00000172465	ENSG00000172465:t:102884422-102884735	-0.26210130616886285;0.46916939864136614;-0.0002275633282308679;-0.04332120651782086	0.7842525698559458;0.9951675472844613;7.371232979209423e-05;0.12323109974964966	0.1603625106907035;0.003045938861005901;0.99729526601468;0.6230049502649428	0.491;0.353;0.008;0.142	0.174;0.819;0.004;0.004	t|1e1.1o2|1e2.1o4|1e2.3o4|1e2.4o4	TRUE	FALSE	TRUE	4	3	0;0;1;1	X	+	102883721-102884422;102883953-102884422;102883980-102884422;102884224-102884422	102883632-102883721;102883902-102884224;102884422-102884735
69	ZFYVE20	gene:ENSG00000131381	ENSG00000131381:s:15137178-15137795	-0.0002672359662814394;-0.5533981138968076;-0.0002672359662814394;0.5751922431912;-0.0002672359662814394;-0.0002672359662814394	0.0001892139161994491;0.9987809335768854;0.0001892139161994491;0.9990362194355146;0.0001892139161994491;0.0001892139161994491	0.996227669173645;0.0007085178282264515;0.996227669173645;0.0005843103112966952;0.996227669173645;0.996227669173645	0.009;0.588;0.009;0.377;0.009;0.009	0.004;0.048;0.004;0.937;0.004;0.004	s|2e1.1o1|2e2.1o1|3e3.1o4|2e3.1o4|2e4.1o1|2e5.1o5	TRUE	FALSE	TRUE	6	6	1;1;1;0;1;1	3	-	15136013-15137480;15133000-15137480;15132046-15137481;15132046-15137480;15131847-15137480;15127468-15137480	15127368-15127468;15131642-15131847;15131906-15132046;15132846-15133000;15135789-15136013;15137178-15137795
70	UNKL	gene:ENSG00000059145	ENSG00000059145:t:1421520-1421612	-2.652624017956264e-06;-0.24820149502108704;0.2090692660049535;-0.0012301782515469208;-2.652624017956264e-06;-2.652624017956264e-06;-2.652624017956264e-06;-2.652624017956264e-06;-2.652624017956264e-06;-2.652624017956264e-06;0.01591409630330443;-2.652624017956264e-06;-2.652624017956264e-06;-2.652624017956264e-06;-2.652624017956264e-06;-2.652624017956264e-06;-2.652624017956264e-06;-2.65262401795626…	8.82061697036173e-08;0.9832382557061958;0.8246282433576992;0.00012061181009046606;8.82061697036173e-08;8.82061697036173e-08;8.82061697036173e-08;8.82061697036173e-08;8.82061697036173e-08;8.82061697036173e-08;0.009928605579274656;8.82061697036173e-08;8.82061697036173e-08;8.82061697036173e-08;8.82061697036173e-08;8.82061697036173e-08;8.82061697036173e-08;8.82061697036173e-08	0.9999633772461222;0.003141589958238211;0.09938736024419113;0.9874098187447622;0.9999633772461222;0.9999633772461222;0.9999633772461222;0.9999633772461222;0.9999633772461222;0.9999633772461222;0.8258945988362576;0.9999633772461222;0.9999633772461222;0.9999633772461222;0.9999633772461222;0.9999633772461222;0.9999633772461222;0.9999633772461222	0.001;0.269;0.660;0.030;0.001;0.001;0.001;0.001;0.001;0.001;0.030;0.001;0.001;0.001;0.001;0.001;0.001;0.001	0.001;0.020;0.894;0.001;0.001;0.001;0.001;0.001;0.001;0.001;0.078;0.001;0.001;0.001;0.001;0.001;0.001;0.001	t|2e1.1o4|2e2.1o4|2e3.1o8|1e3.1o8|2e4.1o1|2e5.1o1|2e6.1o1|2e7.1o1|2e8.5o5|2e8.4o5|2e8.2o5|1e8.2o5|2e8.1o5|2e9.2o3|2e9.1o3|2e10.1o1|2e11.1o1|2e12.1o1	TRUE	TRUE	TRUE	18	13	1;1;0;1;1;1;1;1;0;1;0;1;1;1;1;1;1;1	16	-	1421612-1442892;1421612-1440633;1421612-1435209;1421564-1435209;1421612-1432218;1421612-1431496;1421612-1431051;1421612-1429810;1421612-1429595;1421612-1429550;1421612-1429534;1421564-1429534;1421612-1429366;1421612-1428915;1421612-1428656;1421612-1426865;1421612-1424732;1421612-1424247	1421520-1421612;1424247-nan;1424732-nan;1426865-1426937;1428656-1429122;1429366-1429687;1429810-nan;1431051-nan;1431496-nan;1432218-1432334;1435209-1435422;1440633-1440695;1442892-1442977
71	CHI3L2	gene:ENSG00000064886	ENSG00000064886:t:111772442-111772503	-0.0005795736210031159;0.4162553066392835;-0.4006382201025175	0.0004351166703604017;0.9955725109140953;0.9950495997017117	0.991659866560764;0.001721922632258675;0.0014785785712420063	0.017;0.567;0.417	0.007;0.986;0.007	t|2e1.1o3|2e2.2o3|2e3.1o1	FALSE	FALSE	TRUE	3	4	1;0;0	1	+	111741920-111772474;111770391-111772474;111772379-111772474	111741910-111741920;111770108-111770391;111772314-111772379;111772379-111772432;111772442-111772503
72	BCL2L11	gene:ENSG00000153094	ENSG00000153094:s:111881627-111881716	-1.525917398249917e-05;-0.1662112819508275;-1.525917398249917e-05;-1.525917398249917e-05;-1.525917398249917e-05;-1.525917398249917e-05;0.2931382964127676;-1.525917398249917e-05;-0.023113300502576956	1.0020440957276198e-06;0.7635140572781917;1.0020440957276198e-06;1.0020440957276198e-06;1.0020440957276198e-06;1.0020440957276198e-06;0.9903505929295309;1.0020440957276198e-06;0.02637388074260692	0.9998198822632395;0.09762417466105866;0.9998198822632395;0.9998198822632395;0.9998198822632395;0.9998198822632395;0.0026062919466657386;0.9998198822632395;0.7690611927031649	0.002;0.217;0.002;0.002;0.002;0.002;0.677;0.002;0.091	0.001;0.020;0.001;0.001;0.001;0.001;0.972;0.001;0.001	s|2e1.1o1|2e2.1o3|2e2.3o3|2e3.1o1|2e4.1o1|2e5.1o3|2e6.1o7|2e7.1o2|2e8.1o10	FALSE	TRUE	TRUE	9	9	1;0;1;1;0;1;0;1;1	2	+	111881716-111885865;111881716-111886204;111881716-111886207;111881716-111887709;111881716-111899890;111881716-111902065;111881716-111907621;111881716-111911357;111881716-111921710	111881627-111881716;111885865-111885957;111886204-111886423;111887709-nan;111899890-111899968;111902065-111902097;111907621-111907724;111911357-111911481;111921710-111926024
73	ZNF79	gene:ENSG00000196152	ENSG00000196152:t:130191092-130191199	-5.589248241574817e-05;-0.25405201073446226;0.013126679714466056;0.4875500457161351;-0.09526551308811525;-0.019705030654630567;-5.589248241574817e-05	7.678632614526934e-06;0.8449299035670813;0.002761723668014227;0.9997217526711977;0.39813162877537817;0.047337354579870844;7.678632614526934e-06	0.9994219311801585;0.1016382216147943;0.8649264158114575;0.00013092624908850916;0.28516668623189634;0.8031499269669675;0.9994219311801585	0.003;0.399;0.003;0.272;0.172;0.150;0.003	0.001;0.122;0.064;0.747;0.001;0.063;0.001	t|1e1.1o7|2e1.1o7|2e1.5o7|2e1.6o7|2e2.1o3|2e2.2o3|2e2.3o3	TRUE	TRUE	TRUE	7	3	1;0;1;1;0;1;1	9	+	130187082-130191092;130187082-130191111;130187152-130191111;130187189-130191111;130190939-130191111;130190961-130191111;130190997-130191111	130186661-130187189;130190831-130190997;130191092-130191199
74	ZNF79	gene:ENSG00000196152	ENSG00000196152:s:130186661-130187189	-0.007640721136840052;-0.00011631673948099128;-0.00011631673948099128;-0.42682118888855625;0.01577325544964017;0.4256576660140506;-0.00011631673948099128	0.007214784963661588;3.0630282332503415e-05;3.0630282332503415e-05;0.9941140566027251;0.004909587096691664;0.9909477037189042;3.0630282332503415e-05	0.920878148946344;0.9988031582826601;0.9988031582826601;0.003238573321721394;0.836891550776487;0.005534346201678049;0.9988031582826601	0.069;0.005;0.005;0.551;0.005;0.359;0.005	0.018;0.001;0.001;0.135;0.068;0.780;0.001	s|1e1.1o2|3e1.1o2|1e2.1o7|1e2.2o7|2e2.2o7|3e2.2o7|1e3.1o4	TRUE	TRUE	TRUE	7	4	0;1;1;0;1;1;1	9	+	130187082-130190831;130187189-130190831;130187082-130191092;130187082-130191111;130187152-130191111;130187189-130191111;130187082-130197369	130186661-130187189;130190831-130190997;130191092-130191199;130197369-130197495
75	LRR1	gene:ENSG00000165501	ENSG00000165501:t:50074118-50074839	7.11088032314238e-05;-3.955892737256348e-05;-3.955892737256348e-05;-3.955892737256348e-05;-3.955892737256348e-05;-0.3639440245900213;-3.955892737256348e-05;-3.955892737256348e-05;0.36250039818831437	8.30870611481023e-06;5.836366169526764e-06;5.836366169526764e-06;5.836366169526764e-06;5.836366169526764e-06;0.9857812120246152;5.836366169526764e-06;5.836366169526764e-06;0.9896214091583946	0.9984168581073062;0.9995484817270054;0.9995484817270054;0.9995484817270054;0.9995484817270054;0.008829727822366351;0.9995484817270054;0.9995484817270054;0.006176373086840803	0.003;0.003;0.003;0.003;0.003;0.905;0.003;0.003;0.075	0.013;0.001;0.001;0.001;0.001;0.539;0.001;0.001;0.438	t|1e1.2o8|1e2.1o6|1e2.5o6|1e3.1o2|1e4.1o10|1e4.3o10|2e4.3o10|3e4.3o10|1e5.1o2	TRUE	TRUE	TRUE	9	6	1;1;1;1;1;0;1;1;1	14	+	50065921-50074118;50067415-50074118;50067741-50074118;50068367-50074118;50069181-50074118;50069186-50074118;50069186-50074671;50069186-50074674;50070336-50074118	50065415-50065921;50067070-50067741;50068260-50068367;50069088-50069186;50070270-50070336;50074118-50074839
76	IVD	gene:ENSG00000128928	ENSG00000128928:s:40708459-40708561	-4.784431782982232e-07;-0.2872652249085323;0.0002702465361149546;-0.00025061160409705843;-0.00025061160409705843;-0.00018229528195104993;-4.784431782982232e-07;6.779011225680087e-05;0.0007616620107336306;0.26489557079892057;-0.00023036392249401353	2.887116172401657e-09;0.9798466343803849;1.7835419015694848e-06;4.1117824028218435e-06;4.1117824028218435e-06;4.339309458077206e-06;2.887116172401657e-09;2.387537101532346e-07;9.441166660988848e-06;0.9835554010936827;0.00015079918673182354	0.9999929114969688;0.008116643477240837;0.997221591249402;0.9974325718919952;0.9974325718919952;0.996741487705675;0.9999929114969688;0.9992940497452484;0.9921915466026143;0.005087878966091358;0.9626554229848535	0.001;0.830;0.001;0.019;0.019;0.019;0.001;0.001;0.001;0.073;0.038	0.001;0.549;0.022;0.001;0.001;0.015;0.001;0.015;0.030;0.328;0.038	s|1e1.1o1|1e2.1o3|1e3.1o4|1e4.1o2|1e5.1o2|1e6.1o5|1e6.3o5|1e6.4o5|1e7.1o3|1e8.1o10|1e8.9o10	FALSE	TRUE	TRUE	11	9	1;0;0;1;0;1;1;1;1;1;1	15	+	40708561-40709159;40708561-40710329;40708561-40711379;40708561-40715680;40708561-40716334;40708561-40719189;40708561-40719193;40708561-40719328;40708561-40726053;40708561-40727616;40708561-40727621	40708459-40708561;40709159-nan;40710329-40710966;40711379-40713512;40715680-40715803;40716334-40716672;40719189-40719501;40726053-40726113;40727616-40728146
77	LIPT1	gene:ENSG00000144182	ENSG00000144182:s:99771418-99771514	-0.08563697475276247;0.3833539578964813;-7.903913815880276e-05;-7.903913815880276e-05;-0.12283996943772006;-7.903913815880276e-05;-7.903913815880276e-05	0.3378112521485576;0.9962672347224498;1.571468092459615e-05;1.571468092459615e-05;0.5047449673599449;1.571468092459615e-05;1.571468092459615e-05	0.34930941210214905;0.0015419573566464607;0.9991280379486391;0.9991280379486391;0.3248723038395176;0.9991280379486391;0.9991280379486391	0.171;0.560;0.004;0.004;0.254;0.004;0.004	0.002;0.936;0.002;0.002;0.057;0.002;0.002	s|1e1.1o5|1e2.1o8|1e2.7o8|1e3.1o3|1e4.1o15|1e4.12o15|1e4.14o15	FALSE	TRUE	TRUE	7	5	0;0;1;1;0;1;1	2	+	99771514-99771945;99771514-99772764;99771514-99772788;99771514-99774760;99771514-99778420;99771514-99778423;99771514-99778648	99771418-99771514;99771945-99772007;99772764-99772889;99774760-99775052;99778420-99779620
78	LOXL1-AS1	gene:ENSG00000261801	ENSG00000261801:s:74212179-74212211	0.013163088423259367;-4.364444817120085e-06;-4.364444817120085e-06;-0.08739386487666906;0.27896325940135963;-4.364444817120085e-06;-4.364444817120085e-06;-0.0840198993755292	0.020757332146342712;3.6974960410173536e-07;3.6974960410173536e-07;0.33966822320156614;0.9530369821021216;3.6974960410173536e-07;3.6974960410173536e-07;0.3652772406068848	0.8467790526590202;0.9998594893874492;0.9998594893874492;0.5180327832961947;0.025218455815853743;0.9998594893874492;0.9998594893874492;0.4068457222636358	0.061;0.002;0.002;0.611;0.120;0.002;0.002;0.204	0.114;0.002;0.002;0.426;0.398;0.002;0.002;0.053	s|1e1.2o5|1e1.1o5|1e2.5o5|1e2.1o5|1e3.2o7|1e3.1o7|1e4.1o2|i	FALSE	TRUE	TRUE	8	5	0;1;1;0;0;1;1;0	15	-	74211724-74212179;74211547-74212179;74208795-74212179;74208788-74212179;74204644-74212179;74204642-74212179;74191840-74212179;74212178-74212179	74191830-74191840;74204173-74204644;74208571-74208795;74209937-74211724;74211725-74212178;74212179-74212211	74211725-74212178
79	MLLT10	gene:ENSG00000078403	ENSG00000078403:t:22002701-22002879	-0.0001378777028342406;-0.12583710387426927;0.4781131850866408;-0.03984955682036073;-0.006912581864259337;-0.0001378777028342406;-0.0001378777028342406;-0.0001378777028342406	6.96224659014567e-05;0.40766901456302396;0.9999202708466094;0.1450786486991143;0.012959338671847492;6.96224659014567e-05;6.96224659014567e-05;6.96224659014567e-05	0.9980443704799457;0.4810437239573794;5.1046275856046304e-05;0.7257474551415946;0.8923233219182469;0.9980443704799457;0.9980443704799457;0.9980443704799457	0.005;0.464;0.005;0.422;0.092;0.005;0.005;0.005	0.003;0.207;0.498;0.247;0.043;0.003;0.003;0.003	t|1e1.2o3|1e2.1o3|1e3.1o4|1e4.1o5|1e5.1o1|1e6.1o1|1e7.1o1|1e8.1o1	FALSE	FALSE	TRUE	8	9	1;0;0;0;1;1;1;1	10	+	21962848-22002701;21970305-22002701;21971186-22002701;21977467-22002701;21979890-22002701;21981721-22002701;21997586-22002701;22001269-22002701	21962279-21962848;21970261-21970305;21971154-21971186;21977420-21977467;21979837-21979890;21981597-21981721;21997517-21997586;22001159-22001269;22002701-22002879
80	CENPT	gene:ENSG00000102901	ENSG00000102901:t:67869075-67869241	-0.00010147858875361877;-0.00010147858875361877;-0.00010147858875361877;-0.00010147858875361877;-0.00010147858875361877;-0.00010147858875361877;0.027419784693648617;0.005523730274772012;0.26230341178014954;-0.5287528234311045	8.446077656094165e-05;8.446077656094165e-05;8.446077656094165e-05;8.446077656094165e-05;8.446077656094165e-05;8.446077656094165e-05;0.05765261059296574;0.004096565396264556;0.6879468152450658;0.9976651611782293	0.9978760149812089;0.9978760149812089;0.9978760149812089;0.9978760149812089;0.9978760149812089;0.9978760149812089;0.7386467626656863;0.9411263081641336;0.25161737104889176;0.0015072170612848712	0.005;0.005;0.005;0.005;0.005;0.005;0.005;0.005;0.386;0.576	0.003;0.003;0.003;0.003;0.003;0.003;0.117;0.060;0.746;0.060	t|2e1.1o3|1e1.1o3|2e2.7o8|2e2.4o8|1e2.4o8|2e2.1o8|1e2.1o8|2e3.1o2|2e4.1o2|1e4.1o2	TRUE	TRUE	TRUE	10	5	0;0;1;1;1;0;1;1;0;1	16	-	67869203-67881483;67869198-67881483;67869203-67876934;67869203-67876902;67869198-67876902;67869203-67876861;67869198-67876861;67869203-67874552;67869203-67869441;67869198-67869441	67869075-67869241;67869441-67869561;67874552-nan;67876861-67877045;67881483-67881599
81	FAM63A	gene:ENSG00000143409	ENSG00000143409:t:150974641-150975541	-3.854273629509756e-05;0.5086546296530255;-3.854273629509756e-05;-0.4497791337125959;-3.854273629509756e-05;-3.854273629509756e-05;-3.854273629509756e-05;0.06033661959374451;-3.854273629509756e-05;-0.13202299910687143;-3.854273629509756e-05;-3.854273629509756e-05	9.482930513702532e-06;0.9999997993466287;9.482930513702532e-06;0.991420584844862;9.482930513702532e-06;9.482930513702532e-06;9.482930513702532e-06;0.17954005012905405;9.482930513702532e-06;0.5674717135290258;9.482930513702532e-06;9.482930513702532e-06	0.9994489783419593;8.850882093593085e-08;0.9994489783419593;0.005781787163608221;0.9994489783419593;0.9994489783419593;0.9994489783419593;0.4436377200440617;0.9994489783419593;0.1981859462338319;0.9994489783419593;0.9994489783419593	0.002;0.002;0.002;0.775;0.002;0.002;0.002;0.002;0.002;0.205;0.002;0.002	0.001;0.526;0.001;0.329;0.001;0.001;0.001;0.130;0.001;0.001;0.001;0.001	t|10e1.1o13|9e1.1o13|8e1.1o13|7e1.1o13|6e1.1o13|5e1.1o13|4e1.1o13|3e1.1o13|2e1.1o13|1e1.1o13|7e2.1o1|9e3.1o1	FALSE	TRUE	TRUE	12	4	1;0;1;1;1;1;0;0;1;1;0;1	1	-	150975541-150978788;150975444-150978788;150975186-150978788;150975182-150978788;150975120-150978788;150975005-150978788;150974876-150978788;150974799-150978788;150974787-150978788;150974779-150978788;150975182-150978577;150975444-150976358	150974641-150975541;150976358-nan;150978577-150978723;150978788-150979333
82	NUDT2	gene:ENSG00000164978	ENSG00000164978:s:34329504-34329597	-6.677717104252407e-05;-6.677717104252407e-05;-0.5029523315789295;0.00958034891260963;0.4150782510484647;-6.677717104252407e-05;0.0016286445694621268;-6.677717104252407e-05;-6.677717104252407e-05;-6.677717104252407e-05	1.9746236240853496e-05;1.9746236240853496e-05;0.998588423860971;0.00490471629855344;0.9733042718514857;1.9746236240853496e-05;0.0002873282470850514;1.9746236240853496e-05;1.9746236240853496e-05;1.9746236240853496e-05	0.9991271503197086;0.9991271503197086;0.0008292261475747464;0.901203307214018;0.018690782438213708;0.9991271503197086;0.9818174569329648;0.9991271503197086;0.9991271503197086;0.9991271503197086	0.003;0.003;0.654;0.003;0.316;0.003;0.003;0.003;0.003;0.003	0.002;0.002;0.166;0.066;0.727;0.002;0.034;0.002;0.002;0.002	s|1e1.1o1|1e2.1o5|1e2.2o5|1e2.4o5|1e3.1o8|1e3.7o8|1e4.1o5|1e5.1o3|1e6.1o2|1e7.1o1	FALSE	TRUE	TRUE	10	8	1;1;0;0;0;1;1;1;1;1	9	+	34329597-34330814;34329597-34336216;34329597-34336227;34329597-34336298;34329597-34338711;34329597-34338712;34329597-34339022;34329597-34343122;34329597-34416835;34329597-34437287	34329504-34329597;34330814-34330970;34336216-34336682;34338711-34338845;34339022-34339164;34343122-34343709;34416835-34416845;34437287-34437297
83	MCM9	gene:ENSG00000111877	ENSG00000111877:t:119177534-119177708	-0.7149777595716214;0.7220607190749783;-0.0002178034217447858;-0.0002178034217447858	0.9999963735620608;0.9999979254408948;0.0001717841689413862;0.0001717841689413862	2.1251359857421548e-06;1.2038577198742507e-06;0.9950521615898447;0.9950521615898447	0.890;0.090;0.010;0.010	0.191;0.796;0.007;0.007	t|1e1.2o10|1e2.1o2|1e3.1o2|1e4.1o1	FALSE	FALSE	TRUE	4	5	0;1;1;1	6	-	119177708-119232815;119177708-119215191;119177708-119214680;119177708-119179252	119177534-119177708;119179252-nan;119214680-nan;119215191-nan;119231762-119232934
84	HERC2P9	gene:ENSG00000206149	ENSG00000206149:t:28900942-28901317	-0.653349592553652;0.6533495925536535	0.9983917360960299;0.9983917360960299	0.0012583337451217425;0.0012583337451217696	0.958;0.042	0.315;0.685	t|1e1.1o4|1e2.1o1	FALSE	FALSE	TRUE	2	3	1;0	15	+	28900566-28900942;28900837-28900942	28900419-28900566;28900625-28900837;28900942-28901317
85	TC2N	gene:ENSG00000165929	ENSG00000165929:s:92302527-92302870	0.000430450422034146;-1.1289673885602099e-05;0.000430450422034146;-1.1289673885602099e-05;-0.014779285472303888;-1.1289673885602099e-05;6.668364077906784e-05;0.3111486501931102;0.0013844975797802062;-0.2178735592576725;-1.1289673885602099e-05;-0.014779285472303888;6.668364077906784e-05;-1.1289673885602099e-05;0.000430450422034146	1.4786026280154111e-05;9.119681715057405e-07;1.4786026280154111e-05;9.119681715057405e-07;0.01235445629439534;9.119681715057405e-07;2.2080253318509843e-06;0.9593803553323192;8.263467292304163e-05;0.7524495354075399;9.119681715057405e-07;0.01235445629439534;2.2080253318509843e-06;9.119681715057405e-07;1.4786026280154111e-05	0.9953462473184971;0.9998655663332999;0.9953462473184971;0.9998655663332999;0.8511109763865955;0.9998655663332999;0.9990677302773223;0.0249695406148048;0.9855895167515164;0.1771135520488163;0.9998655663332999;0.8511109763865955;0.9990677302773223;0.9998655663332999;0.9953462473184971	0.001;0.001;0.001;0.001;0.080;0.001;0.001;0.137;0.001;0.690;0.001;0.080;0.001;0.001;0.001	0.022;0.001;0.022;0.001;0.001;0.001;0.011;0.449;0.033;0.423;0.001;0.001;0.011;0.001;0.022	s|1e2.1o1|3e3.1o2|1e3.1o2|3e4.1o3|1e4.1o3|1e5.1o2|1e6.1o2|3e7.2o25|2e7.2o25|1e7.2o25|3e7.1o25|3e8.1o4|3e9.1o10|2e9.1o10|1e9.1o10	TRUE	TRUE	TRUE	15	9	1;1;1;1;1;1;1;0;1;0;1;1;1;1;1	14	-	92301990-92302527;92299046-92302715;92299046-92302527;92292660-92302715;92292660-92302527;92289375-92302527;92283927-92302527;92280169-92302715;92280169-92302605;92280169-92302527;92280103-92302715;92278800-92302715;92268765-92302715;92268765-92302605;92268765-92302527	92268598-92268781;92278656-92278889;92280047-92280169;92283866-92283927;92289260-92289861;92292539-92292660;92298980-92299046;92301796-92301990;92302527-92302870

## Sheet: 8hr CD28 Donor 2
8hr CD28 AS Events - Donor 2
	X.Gene.Name	Gene.ID	LSV.ID	E.dPSI..per.LSV.junction	P..dPSI...0.10..per.LSV.junction	P..dPSI...0.05..per.LSV.junction	ND523.8hr.Unstim.E.PSI.	ND523.8hr.CD28.E.PSI.	LSV.Type	A5SS	A3SS	ES	Num..Junctions	Num..Exons	De.Novo.Junctions	chr	strand	Junctions.coords	Exons.coords	IR.coords
1	CELSR3	gene:ENSG00000008300	ENSG00000008300:t:48680987-48681473	-4.167250812354071e-06;-4.167250812354071e-06;-4.167250812354071e-06;0.6601960445919715;-0.6646927901095763	0.0008773309208477671;0.0008773309208477671;0.0008773309208477671;0.9882780383148442;0.9891836952051949	0.989201196291487;0.989201196291487;0.989201196291487;0.009401225786635561;0.008676338523729954	0.013;0.013;0.013;0.147;0.813	0.014;0.014;0.014;0.800;0.157	t|2e1.1o3|1e1.1o3|3e2.1o3|2e2.1o3|1e2.1o3	FALSE	TRUE	TRUE	5	3	1;1;1;1;0	3	-	48681113-48682149;48681110-48682149;48681473-48681649;48681113-48681649;48681110-48681649	48680987-48681473;48681649-48681728;48682149-48682261
2	DCLRE1C	gene:ENSG00000152457	ENSG00000152457:t:14987104-14987188	5.856740149173338e-05;-0.4715021834659077;5.856740149173338e-05;-0.0007134510706797703;0.44376290973119886	4.171994659136046e-05;0.9970228696628196;4.171994659136046e-05;0.011383581392291418;0.9999450368937666	0.9978199832313164;0.0018338695468872457;0.9978199832313164;0.8862666810488702;1.1531072225759082e-05	0.005;0.891;0.005;0.095;0.005	0.006;0.430;0.006;0.097;0.461	t|1e1.1o2|1e2.1o5|1e3.4o5|1e3.1o5|1e4.1o1	TRUE	FALSE	TRUE	5	5	0;0;1;0;0	10	-	14987188-14995901;14987188-14991035;14987188-14989553;14987188-14989524;14987188-14987434	14987104-14987188;14987434-14987564;14989524-14989634;14991035-14991086;14995901-14996431
3	IL18BP	gene:ENSG00000137496	ENSG00000137496:s:71709587-71710065	5.427448120148962e-06;-0.6142884183396509;0.00624599931457688;5.427448120148962e-06;5.427448120148962e-06;0.0017222356371063652;5.427448120148962e-06;5.427448120148962e-06;0.3513522041999201;5.427448120148962e-06;0.031599287795978065	2.29661079715456e-05;0.9999055701792806;0.005135769626369971;2.29661079715456e-05;2.29661079715456e-05;0.0007877651684771212;2.29661079715456e-05;2.29661079715456e-05;0.8718044774082385;2.29661079715456e-05;0.07428782595960662	0.9988976365774167;5.801610251898737e-05;0.9363560026664991;0.9988976365774167;0.9988976365774167;0.9814877324293146;0.9988976365774167;0.9988976365774167;0.09897636233259383;0.9988976365774167;0.7095803875494383	0.003;0.725;0.003;0.003;0.003;0.003;0.003;0.003;0.246;0.003;0.002	0.003;0.124;0.063;0.003;0.003;0.033;0.003;0.003;0.639;0.003;0.124	s|1e1.3o5|1e1.4o5|1e1.5o5|1e2.1o8|1e2.4o8|1e2.5o8|1e3.1o12|1e3.4o12|1e3.7o12|1e3.12o12|i	FALSE	TRUE	TRUE	11	4	1;0;0;1;1;1;1;1;0;1;0	11	+	71710065-71710251;71710065-71710274;71710065-71710305;71710065-71710509;71710065-71710622;71710065-71710663;71710065-71710846;71710065-71710859;71710065-71710973;71710065-71710978;71710065-71710066	71709587-71710065;71710066-71710108;71710109-71710416;71710509-71710708;71710846-71711058	71710066-71710108
4	SBNO2	gene:ENSG00000064932	ENSG00000064932:t:1127603-1127764	-2.4424047306525475e-06;-0.3226363401903657;-2.4424047306525475e-06;-2.4424047306525475e-06;7.7818667797469e-05;0.3109213567747715;-2.4424047306525475e-06;-2.4424047306525475e-06;-2.4424047306525475e-06;-2.4424047306525475e-06	4.088703766896248e-08;0.9939742568041191;4.088703766896248e-08;4.088703766896248e-08;3.5343854590692896e-07;0.9914024500837296;4.088703766896248e-08;4.088703766896248e-08;4.088703766896248e-08;4.088703766896248e-08	0.9999720483491502;0.0024518944953472177;0.9999720483491502;0.9999720483491502;0.9991504819577406;0.0035936479113338766;0.9999720483491502;0.9999720483491502;0.9999720483491502;0.9999720483491502	0.001;0.871;0.001;0.001;0.001;0.118;0.001;0.001;0.001;0.001	0.001;0.559;0.001;0.001;0.016;0.421;0.001;0.001;0.001;0.001	t|2e1.1o6|2e2.1o3|2e3.1o1|2e4.1o1|2e5.1o1|2e6.1o3|1e6.1o3|2e7.1o1|2e8.1o1|2e9.1o1	FALSE	TRUE	TRUE	10	10	1;0;1;1;1;0;1;1;1;1	19	-	1127764-1174171;1127764-1147308;1127764-1143708;1127764-1143107;1127764-1140864;1127764-1132089;1127746-1132089;1127764-1131850;1127764-1130373;1127764-1129141	1127603-1127764;1129141-nan;1130373-nan;1131850-1131915;1132089-1132220;1140864-nan;1143107-nan;1143708-1143923;1147308-1147419;1174171-1174282
5	RABL2A	gene:ENSG00000144134	ENSG00000144134:s:114384806-114385087	7.184365610326031e-05;-2.931954902798252e-07;-0.014745612647461888;-0.00021607807952967375;-2.931954902798252e-07;-0.2605496675940431;-2.931954902798252e-07;-2.931954902798252e-07;-2.931954902798252e-07;0.23039352664633164;-2.931954902798252e-07;0.02464311733179384;-2.931954902798252e-07	2.976360389513607e-07;1.3532215798389362e-09;0.024635198508232863;2.542311487483772e-06;1.3532215798389362e-09;0.972518845407241;1.3532215798389362e-09;1.3532215798389362e-09;1.3532215798389362e-09;0.8721812854597467;1.3532215798389362e-09;0.012059923823851583;1.3532215798389362e-09	0.9992565228179678;0.9999949849195843;0.8339925724773181;0.9977861319320667;0.9999949849195843;0.009846199026959157;0.9999949849195843;0.9999949849195843;0.9999949849195843;0.07396308572771426;0.9999949849195843;0.7490767399842712;0.9999949849195843	0.001;0.001;0.170;0.018;0.001;0.377;0.001;0.001;0.001;0.435;0.001;0.001;0.001	0.015;0.001;0.112;0.001;0.001;0.116;0.001;0.001;0.001;0.679;0.001;0.073;0.001	s|3e1.1o1|2e2.1o3|3e2.1o3|3e3.1o1|1e4.1o22|3e4.1o22|4e4.1o22|5e4.1o22|2e4.13o22|3e4.13o22|5e4.13o22|3e4.20o22|3e4.22o22	TRUE	TRUE	TRUE	13	5	1;1;0;1;1;0;1;1;1;0;1;1;1	2	+	114384977-114385192;114384973-114385433;114384977-114385433;114384977-114385629;114384948-114386127;114384977-114386127;114385045-114386127;114385087-114386127;114384973-114386131;114384977-114386131;114385087-114386131;114384977-114386174;114384977-114386178	114384806-114385087;114385192-114385433;114385433-114385587;114385629-114385709;114386127-114386290
6	BTBD7	gene:ENSG00000011114	ENSG00000011114:s:93799166-93799438	1.127503118486068e-06;1.127503118486068e-06;-0.409765078283493;0.4735574437160345;1.127503118486068e-06;-0.005309596729761239;1.127503118486068e-06	2.384332779329251e-05;2.384332779329251e-05;0.9658755869999481;0.9972676339575246;2.384332779329251e-05;0.0031226215288309685;2.384332779329251e-05	0.9985854586043892;0.9985854586043892;0.024413284367396093;0.0016946589369028237;0.9985854586043892;0.944904462498518;0.9985854586043892	0.004;0.004;0.850;0.081;0.004;0.055;0.004	0.004;0.004;0.434;0.539;0.004;0.004;0.004	s|1e1.1o1|1e2.1o1|1e3.1o1|1e4.1o6|1e5.1o2|1e6.1o3|1e7.1o4	FALSE	FALSE	TRUE	7	8	1;1;1;0;1;0;1	14	-	93797737-93799166;93793146-93799166;93791211-93799166;93762503-93799166;93761283-93799166;93730339-93799166;93728023-93799166	nan-93793146;nan-93797737;93727948-93728023;93729867-93730339;93761199-93761283;93762316-93762504;93790906-93791211;93799166-93799438
7	ZNF468	gene:ENSG00000204604	ENSG00000204604:t:53352340-53352985	-8.110307851088866e-06;0.320384765738357;-8.110307851088866e-06;-0.388642790817445;-8.110307851088866e-06;0.03197994351246014;-0.010778888894585142	4.531651412161104e-05;0.9911454167692463;4.531651412161104e-05;0.944106268756151;4.531651412161104e-05;0.0758817484229969;0.026983533191108668	0.998005356869319;0.002589865440835041;0.998005356869319;0.040955056474160645;0.998005356869319;0.7047692806516698;0.8462490884948219	0.004;0.004;0.004;0.853;0.004;0.004;0.126	0.004;0.338;0.004;0.452;0.004;0.128;0.066	t|1e1.1o1|1e2.1o1|3e3.1o5|1e3.1o5|1e4.3o3|1e4.2o3|1e4.1o3	TRUE	TRUE	TRUE	7	5	1;1;1;0;1;1;1	19	-	53352466-53421112;53352466-53393494;53352985-53357511;53352466-53357511;53352466-53357265;53352466-53357132;53352466-53357125	53352340-53352985;53357125-53357379;53357511-53357598;53393494-53393504;53421112-53421122
8	NDRG2	gene:ENSG00000165795	ENSG00000165795:t:21491400-21491899	-5.763677151364736e-07;-5.763677151364736e-07;-5.763677151364736e-07;-0.2605848713033665;-5.763677151364736e-07;-5.763677151364736e-07;-8.454094057834046e-05;0.19450353213643548;0.004874812748294741;-5.763677151364736e-07;-5.763677151364736e-07	1.568747704219606e-08;1.568747704219606e-08;1.568747704219606e-08;0.9684129902187218;1.568747704219606e-08;1.568747704219606e-08;1.330399142327592e-06;0.7986970449240706;0.0006512217902170541;1.568747704219606e-08;1.568747704219606e-08	0.9999783557529418;0.9999783557529418;0.9999783557529418;0.012585042373742361;0.9999783557529418;0.9999783557529418;0.9991189161462;0.11722387961548396;0.9501370907027397;0.9999783557529418;0.9999783557529418	0.001;0.001;0.001;0.343;0.001;0.001;0.012;0.638;0.001;0.001;0.001	0.001;0.001;0.001;0.089;0.001;0.001;0.001;0.856;0.050;0.001;0.001	t|1e1.1o1|1e2.1o1|1e3.1o3|1e4.1o3|1e5.4o5|1e5.3o5|1e5.1o5|1e6.3o3|1e6.2o3|1e6.1o3|1e7.1o1	TRUE	FALSE	TRUE	11	8	0;0;0;0;0;0;0;0;0;0;0	14	-	21491480-21538987;21491480-21515025;21491480-21493836;21491480-21493188;21491480-21493008;21491480-21492997;21491480-21492985;21491480-21492189;21491480-21492145;21491480-21492135;21491480-21492048	21491400-21491899;21492048-21492113;21492135-21492298;21492985-21493185;21493188-21493220;21493836-21494007;21515025-21515089;21538987-21539031
9	CTAGE5	gene:ENSG00000150527	ENSG00000150527:s:39788413-39788495	0.27504097681410594;-0.2750409768141044	0.9898192451891084;0.9898192451891084	0.002479476453953407;0.002479476453953411	0.651;0.349	0.917;0.083	s|1e1.1o1|1e2.1o6	FALSE	FALSE	TRUE	2	3	0;0	14	+	39788495-39790132;39788495-39796068	39788413-39788495;39790132-39790260;39796068-39796226
10	CKMT2-AS1	gene:ENSG00000247572	ENSG00000247572:t:80533384-80535179	0.06556442456515423;-0.3421474918723033;-2.113478692942639e-05;-0.005313835710890312;-2.113478692942639e-05;0.10003223951865912;-2.113478692942639e-05;0.059137261635014975;0.00033278013450981005;-2.113478692942639e-05;-2.113478692942639e-05;-0.042236881237402546;0.007078361971669047;-2.113478692942639e-05	0.268826904137254;0.9742285919063377;4.0109467259188935e-06;0.026862156330440708;4.0109467259188935e-06;0.4504078298673906;4.0109467259188935e-06;0.16941679892607883;3.1274967645571396e-05;4.0109467259188935e-06;4.0109467259188935e-06;0.13700535958008825;0.0039801479438855;4.0109467259188935e-06	0.5648290344055539;0.014776654805355283;0.9996597997043724;0.8541318065614824;0.9996597997043724;0.22235428905287524;0.9996597997043724;0.4501670570301387;0.9960417556755732;0.9996597997043724;0.9996597997043724;0.6320719445156459;0.9075696204806126;0.9996597997043724	0.099;0.439;0.002;0.270;0.002;0.002;0.002;0.002;0.002;0.002;0.002;0.150;0.026;0.002	0.267;0.098;0.001;0.223;0.001;0.160;0.001;0.128;0.017;0.001;0.001;0.033;0.065;0.001	t|2e1.1o14|1e1.1o14|2e2.1o3|2e3.1o5|1e3.1o5|2e4.7o9|1e4.7o9|2e4.1o9|1e4.1o9|2e5.1o1|2e6.1o1|2e7.3o3|2e7.1o3|1e7.1o3	TRUE	TRUE	TRUE	14	8	0;1;1;0;1;1;1;1;0;1;1;1;1;1	5	-	80535179-80597106;80535174-80597106;80535179-80595969;80535179-80542709;80535174-80542709;80535179-80541068;80535174-80541068;80535179-80540563;80535174-80540563;80535179-80538784;80535179-80536147;80535179-80535723;80535179-80535283;80535174-80535283	80533384-80535179;80535283-80535786;80536147-80536199;80538784-nan;80540563-80541228;80542709-80542791;80595969-80596156;80597106-80597379
11	PYROXD1	gene:ENSG00000121350	ENSG00000121350:s:21602497-21602638	-0.45123864470028174;0.4503593058888079;-0.00012683086895549402	0.9999450379286416;0.999986282993383;3.403721984300222e-05	2.237041819452834e-05;4.928521688716446e-06;0.9976424154885555	0.984;0.008;0.008	0.532;0.467;0.006	s|1e1.1o2|1e2.1o4|2e2.1o4	TRUE	FALSE	TRUE	3	3	0;0;1	12	+	21602625-21605015;21602625-21608066;21602638-21608066	21602497-21602638;21605015-21605088;21608066-21608226
12	PDIK1L	gene:ENSG00000175087	ENSG00000175087:t:26440783-26441084	0.009158745260191387;0.32651283998572844;-0.4095307054212033	0.024036433571998438;0.8910581891211435;0.998296246394054	0.8568804963790365;0.08029614411793802;0.000903360199819736	0.082;0.483;0.432	0.135;0.833;0.034	t|1e1.1o3|1e2.1o3|1e3.1o1	FALSE	FALSE	TRUE	3	4	0;0;0	1	+	26437911-26440783;26438406-26440783;26439141-26440783	26437664-26437911;26438328-26438406;26438951-26439141;26440783-26441084
13	RAD51D	gene:ENSG00000185379	ENSG00000185379:s:33445520-33445638	0.38739573623035156;0.008339741616354217;-0.29019240430764454;-9.191702446712716e-05;-0.01380267403635437;-9.191702446712716e-05;-9.191702446712716e-05;-9.191702446712716e-05	0.9939617140103111;0.010001887235246821;0.7484507013790107;0.00014586183173803107;0.025066487468665678;0.00014586183173803107;0.00014586183173803107;0.00014586183173803107	0.0035897545081019404;0.913384091113476;0.20212209946366122;0.9966657830383047;0.8687607059795375;0.9966657830383047;0.9966657830383047;0.9966657830383047	0.006;0.006;0.856;0.006;0.106;0.006;0.006;0.006	0.409;0.079;0.486;0.005;0.005;0.005;0.005;0.005	s|1e1.1o2|1e2.1o1|1e3.1o6|1e4.2o5|1e5.4o9|1e5.1o9|1e6.1o4|1e7.1o6	FALSE	TRUE	TRUE	8	8	0;1;0;0;1;1;1;1	17	-	33444056-33445520;33443811-33445520;33434466-33445520;33434141-33445520;33433500-33445520;33433496-33445520;33430563-33445520;33428384-33445520	33428220-33428400;33430473-33430563;33433405-33433500;33434007-33434141;33434385-33434466;33443714-33443811;33443878-33444056;33445520-33445638
14	C17orf80	gene:ENSG00000141219	ENSG00000141219:t:71238937-71239142	-0.0001767753611598705;0.3711545812407737;-0.0001767753611598705;-0.35928920142165116	4.161963730342024e-05;0.9916919067311935;4.161963730342024e-05;0.9838248230618465	0.9980792096203638;0.005080028096796386;0.9980792096203638;0.01030340613951597	0.007;0.065;0.007;0.920	0.003;0.434;0.003;0.556	t|2e1.1o6|2e1.4o6|1e2.1o2|2e2.1o2	TRUE	TRUE	TRUE	4	3	1;0;1;0	17	+	71231661-71239035;71233134-71239035;71238490-71238937;71238490-71239035	71231615-71233134;71238383-71238490;71238937-71239142
15	ZNF512	gene:ENSG00000243943	ENSG00000243943:s:27806455-27806583	-0.00020638176121408984;-0.00020638176121408984;-0.33735465101827955;0.35043240410653337;-0.00020638176121408984;-0.00020638176121408984	8.73620128406951e-05;8.73620128406951e-05;0.9767716846310096;0.9980994502982692;8.73620128406951e-05;8.73620128406951e-05	0.997727743267054;0.997727743267054;0.01643003406637722;0.0012556420184786658;0.997727743267054;0.997727743267054	0.007;0.007;0.967;0.007;0.007;0.007	0.002;0.002;0.624;0.369;0.002;0.002	s|1e1.2o2|1e2.1o11|1e2.2o11|1e2.6o11|1e2.10o11|1e3.1o2	FALSE	TRUE	TRUE	6	4	1;1;0;0;1;1	2	+	27806583-27807119;27806583-27820897;27806583-27820934;27806583-27820937;27806583-27821035;27806583-27838035	27806455-27806583;27806627-27807177;27820897-27821121;27838035-27838139
16	ZNF512	gene:ENSG00000243943	ENSG00000243943:t:27820897-27821121	-1.9657193122693583e-05;-1.9657193122693583e-05;-0.3743700449686429;0.011587947851223782;0.0031742137550343275;-1.9657193122693583e-05;-1.9657193122693583e-05;0.0002152562974578198;0.25844345872703595;-1.9657193122693583e-05;-1.9657193122693583e-05	1.8526540100009473e-06;1.8526540100009473e-06;0.9985848807306683;0.017968140540648204;0.0003112218279977692;1.8526540100009473e-06;1.8526540100009473e-06;0.02564183751232266;0.998189575449486;1.8526540100009473e-06;1.8526540100009473e-06	0.9997744891306197;0.9997744891306197;0.0004213097491877482;0.852372608617753;0.9671280911201072;0.9997744891306197;0.9997744891306197;0.8552507443577746;0.00010933228043964358;0.9997744891306197;0.9997744891306197	0.002;0.002;0.427;0.063;0.002;0.002;0.002;0.497;0.002;0.002;0.002	0.001;0.001;0.064;0.115;0.043;0.001;0.001;0.496;0.277;0.001;0.001	t|2e1.1o15|3e1.1o15|2e1.4o15|3e1.4o15|4e1.4o15|6e1.4o15|1e2.1o6|2e2.1o6|3e2.1o6|5e2.1o6|2e3.1o1	TRUE	TRUE	TRUE	11	4	1;1;0;1;1;1;1;0;0;1;1	2	+	27805995-27820934;27805995-27820937;27806009-27820934;27806009-27820937;27806009-27820940;27806009-27821050;27806583-27820897;27806583-27820934;27806583-27820937;27806583-27821035;27807177-27820934	27805897-27806043;27806455-27806583;27806627-27807177;27820897-27821121
17	CECR1	gene:ENSG00000093072	ENSG00000093072:t:17690246-17690779	-2.6255461487902473e-05;-2.6255461487902473e-05;-2.6255461487902473e-05;0.5695126787441128;-2.6255461487902473e-05;-0.002434747498310208;-2.6255461487902473e-05;0.0024960231423094155;-2.6255461487902473e-05;-0.5036613874009959;-0.012651248400906626	8.060902698584838e-06;8.060902698584838e-06;8.060902698584838e-06;0.9999297478960374;8.060902698584838e-06;0.0031047621260551716;8.060902698584838e-06;0.0007119005470454563;8.060902698584838e-06;0.999915052243558;0.013085302191168715	0.9994161618874792;0.9994161618874792;0.9994161618874792;3.843559839316686e-05;0.9994161618874792;0.9332210374545076;0.9994161618874792;0.9737181727544651;0.9994161618874792;3.72963230871326e-05;0.8735684380292764	0.002;0.002;0.002;0.311;0.002;0.055;0.002;0.002;0.002;0.539;0.081	0.002;0.002;0.002;0.870;0.002;0.039;0.002;0.039;0.002;0.039;0.002	t|4e1.1o3|2e1.1o3|1e1.1o3|4e2.1o5|3e2.1o5|1e2.1o5|4e3.3o3|4e3.1o3|1e3.1o3|4e4.1o2|1e4.1o2	TRUE	TRUE	TRUE	11	5	0;0;0;0;0;1;1;1;1;1;1	22	-	17690613-17702617;17690575-17702617;17690488-17702617;17690613-17700246;17690580-17700246;17690488-17700246;17690613-17693395;17690613-17693148;17690488-17693148;17690613-17692893;17690488-17692893	17690246-17690779;17692893-nan;17693148-17693468;17700246-17700325;17702617-17702879
18	PARP11	gene:ENSG00000111224	ENSG00000111224:t:3935324-3935399	-0.5315558915363694;0.5315558915363708	0.9996192134085554;0.9996192134085554	0.00017565737388203218;0.00017565737388209693	0.574;0.426	0.055;0.945	t|1e1.1o3|1e2.1o2	FALSE	FALSE	TRUE	2	3	0;0	12	-	3935399-3939056;3935399-3938076	3935324-3935399;3938076-3938196;3939056-3939184
19	ING2	gene:ENSG00000168556	ENSG00000168556:t:184431435-184432249	-0.00010022009699887897;-0.00010022009699887897;-0.40981769034663906;0.4148748017294566	1.6812386645060743e-05;1.6812386645060743e-05;0.9947564590771204;0.995931189294167	0.9987201539065713;0.9987201539065713;0.0030885298784877335;0.0023590578706281493	0.006;0.006;0.837;0.151	0.003;0.003;0.438;0.557	t|1e1.1o2|1e1.2o2|1e2.1o2|1e3.1o1	TRUE	FALSE	TRUE	4	4	1;1;0;0	4	+	184425831-184431435;184425838-184431435;184426520-184431435;184427471-184431435	184425821-184425838;184426147-184426520;184427235-184427471;184431435-184432249
20	PIGV	gene:ENSG00000060642	ENSG00000060642:t:27117250-27117384	-0.3195335461883063;0.13143018790771105;0.01434806012253558;-0.015096873850050686;5.706536216672551e-07;0.014864547844192432;5.706536216672551e-07	0.972084249710817;0.4716787271219129;0.0506538499560845;0.03713187031213886;4.3657586123418955e-06;0.01346816882681026;4.3657586123418955e-06	0.015891343393543034;0.41305374972325365;0.8179178782448774;0.8227818576795198;0.9994211203695765;0.8501449010185911;0.9994211203695765	0.399;0.227;0.210;0.154;0.003;0.003;0.003	0.080;0.455;0.297;0.080;0.003;0.080;0.003	t|1e1.1o5|1e1.4o5|1e2.1o7|1e2.4o7|1e2.5o7|1e2.6o7|1e3.1o1	TRUE	FALSE	TRUE	7	4	0;1;0;0;1;0;0	1	+	27114297-27117250;27114480-27117250;27114759-27117250;27114885-27117250;27115166-27117250;27115310-27117250;27115521-27117250	27113963-27114480;27114486-27115310;27115419-27115521;27117250-27117384
21	TBC1D7	gene:ENSG00000145979	ENSG00000145979:t:13327019-13327195	-3.450693283628568e-05;-0.01579395810041216;-0.06244873670072307;-0.017028622021138345;0.008365021070815533;-3.450693283628568e-05;0.3199434095606457;-3.450693283628568e-05;-3.450693283628568e-05;-3.450693283628568e-05;-3.450693283628568e-05	1.9186485832533528e-05;0.03694653165266304;0.222779722908361;0.02537699760989653;0.03474194985348824;1.9186485832533528e-05;0.9686974119182071;1.9186485832533528e-05;1.9186485832533528e-05;1.9186485832533528e-05;1.9186485832533528e-05	0.9990338217821582;0.8204095353768701;0.6489796393532399;0.8336961207853824;0.8410484171580637;0.9990338217821582;0.01955030902476577;0.9990338217821582;0.9990338217821582;0.9990338217821582;0.9990338217821582	0.003;0.128;0.565;0.097;0.159;0.003;0.034;0.003;0.003;0.003;0.003	0.002;0.050;0.352;0.002;0.219;0.002;0.358;0.002;0.002;0.002;0.002	t|1e1.1o1|3e2.1o3|1e2.1o3|3e3.4o5|1e3.4o5|3e3.1o5|1e3.1o5|3e4.1o2|1e4.1o2|3e5.1o2|1e5.1o2	TRUE	TRUE	TRUE	11	6	1;0;0;1;0;0;0;0;0;0;1	6	-	13327138-13338113;13327195-13328688;13327138-13328688;13327195-13328548;13327138-13328548;13327195-13328528;13327138-13328528;13327195-13328065;13327138-13328065;13327195-13327910;13327138-13327910	13327019-13327195;13327910-13328050;13328065-13328362;13328528-13328564;13328688-13328815;13338113-13338123
22	LMF1	gene:ENSG00000103227	ENSG00000103227:s:984190-984254	0.3524368180398054;-0.000481982816665761;0.0009504976178292934;-0.3793084496746325;0.004605496177808776;-0.000481982816665761	0.9505054290880944;0.000555323838504576;0.0010828588181552423;0.8789108927780653;0.003904767562721077;0.000555323838504576	0.03886848047610512;0.9936169205099077;0.9787258491662718;0.09840259942973206;0.9411049315522468;0.9936169205099077	0.014;0.014;0.014;0.931;0.014;0.014	0.394;0.005;0.032;0.505;0.059;0.005	s|2e1.1o1|2e2.1o2|1e2.1o2|2e3.2o8|1e3.2o8|2e4.1o4	TRUE	FALSE	TRUE	6	5	1;1;1;0;0;1	16	-	984145-984244;981793-984244;981793-984190;961079-984244;961079-984190;943072-984244	943007-943072;960858-961079;981642-981793;983991-984145;984190-984254
23	OFD1	gene:ENSG00000046651	ENSG00000046651:s:13769368-13769487	-1.597063104573285e-05;0.39071992532704863;-1.597063104573285e-05;-0.31080953736511174;-0.0018009638322458803;-0.0018009638322458803	6.792738283949028e-07;0.9965789160769014;6.792738283949028e-07;0.944861225778691;0.0002616112929100303;0.0002616112929100303	0.9998254823672985;0.001702858762159201;0.9998254823672985;0.03477014873074036;0.981582401085166;0.981582401085166	0.003;0.203;0.003;0.726;0.033;0.033	0.001;0.594;0.001;0.401;0.001;0.001	s|1e1.1o3|2e1.1o3|2e2.1o5|2e2.2o5|2e3.1o5|2e4.1o4	TRUE	TRUE	TRUE	6	5	1;0;1;0;1;1	X	+	13769486-13770823;13769487-13770823;13769487-13771471;13769487-13771487;13769487-13773270;13769487-13774697	13769368-13769487;13770823-13771223;13771471-13771560;13773270-13773361;13774697-13774886
24	LLGL2	gene:ENSG00000073350	ENSG00000073350:s:73521807-73521906	0.2555721525527944;-0.0001197685681834967;-0.0055612563276964885;-0.0001197685681834967;-0.0001197685681834967;-0.10093626808384303;-0.0001197685681834967;-0.0001197685681834967	0.9587435360489908;7.06658800035681e-05;0.012183584974184328;7.06658800035681e-05;7.06658800035681e-05;0.3679504587552979;7.06658800035681e-05;7.06658800035681e-05	0.017649566422063685;0.9979120826609198;0.8923994399784535;0.9979120826609198;0.9979120826609198;0.5102592443547027;0.9979120826609198;0.9979120826609198	0.005;0.005;0.089;0.005;0.005;0.880;0.005;0.005	0.282;0.003;0.051;0.003;0.003;0.654;0.003;0.003	s|1e1.1o1|1e2.1o4|1e3.1o2|1e4.1o3|1e4.3o3|1e5.2o11|1e5.11o11|1e6.1o4	FALSE	TRUE	TRUE	8	7	1;0;0;1;1;0;1;1	17	+	73521906-73527931;73521906-73529723;73521906-73534612;73521906-73535871;73521906-73535874;73521906-73539478;73521906-73539486;73521906-73552127	73521807-73521906;73527931-73528110;73529723-73529786;73534612-73534717;73535871-73535967;73539342-73539582;73552127-73552224
25	ZNF197	gene:ENSG00000186448	ENSG00000186448:s:44666511-44666635	-0.00012351807406476298;0.5297006422501387;-0.3050466946787032;-0.01813122498829493;-0.00012351807406476298;-0.00012351807406476298;-0.00012351807406476298	0.0002971672418350868;0.9651080249069363;0.7184742621735632;0.04134196414971625;0.0002971672418350868;0.0002971672418350868;0.0002971672418350868	0.9948056367071868;0.02756344477448719;0.2300098783322173;0.8368797159144414;0.9948056367071868;0.9948056367071868;0.9948056367071868	0.008;0.244;0.597;0.126;0.008;0.008;0.008	0.006;0.779;0.188;0.006;0.006;0.006;0.006	s|1e1.1o1|1e2.2o4|1e2.3o4|1e3.1o3|1e4.1o5|1e5.1o3|1e6.1o4	FALSE	TRUE	TRUE	7	7	1;0;0;1;1;1;1	3	+	44666635-44667330;44666635-44670557;44666635-44670566;44666635-44672554;44666635-44673597;44666635-44673965;44666635-44687983	44666511-44666635;44667330-nan;44670480-44671036;44672554-44672713;44673597-44673688;44673965-44674091;44687983-44689963
26	ISY1-RAB43	gene:ENSG00000261796	ENSG00000261796:t:128813829-128814012	1.077966109646681e-05;1.077966109646681e-05;1.077966109646681e-05;1.077966109646681e-05;1.077966109646681e-05;1.077966109646681e-05;1.077966109646681e-05;1.077966109646681e-05;0.03063464003406112;0.006881390862436213;-0.38218353593887155;1.077966109646681e-05;1.077966109646681e-05;1.077966109646681e-05;1.077966109646681e-05;1.077966109646681e-05;0.03591023801925873;0.0011742120752314845	1.5088908006396189e-05;1.5088908006396189e-05;1.5088908006396189e-05;1.5088908006396189e-05;1.5088908006396189e-05;1.5088908006396189e-05;1.5088908006396189e-05;1.5088908006396189e-05;0.11728731951839454;0.006331227089991913;0.9731390782522977;1.5088908006396189e-05;1.5088908006396189e-05;1.5088908006396189e-05;1.5088908006396189e-05;1.5088908006396189e-05;0.09369220097596127;0.006787431542877502	0.9993133662871917;0.9993133662871917;0.9993133662871917;0.9993133662871917;0.9993133662871917;0.9993133662871917;0.9993133662871917;0.9993133662871917;0.7526472335236291;0.9307264302153337;0.018418301026323247;0.9993133662871917;0.9993133662871917;0.9993133662871917;0.9993133662871917;0.9993133662871917;0.6790526196109734;0.90882489417384	0.002;0.002;0.002;0.002;0.002;0.002;0.002;0.002;0.475;0.002;0.449;0.002;0.002;0.002;0.002;0.002;0.002;0.057	0.002;0.002;0.002;0.002;0.002;0.002;0.002;0.002;0.635;0.069;0.069;0.002;0.002;0.002;0.002;0.002;0.135;0.069	t|1e1.1o2|1e2.1o4|1e3.4o4|1e3.1o4|1e4.1o1|1e5.1o1|1e6.1o1|1e7.1o1|1e8.1o1|1e9.1o1|1e10.1o1|1e11.1o1|1e12.1o1|1e13.1o1|1e14.1o1|1e15.1o1|1e16.1o1|1e17.1o1	TRUE	FALSE	TRUE	18	18	1;1;1;0;1;1;1;1;1;1;1;1;1;1;1;1;1;1	3	-	128814012-128902619;128814012-128852917;128814012-128848985;128814012-128848931;128814012-128841979;128814012-128840824;128814012-128840587;128814012-128840554;128814012-128840143;128814012-128839024;128814012-128838829;128814012-128837351;128814012-128831854;128814012-128828867;128814012-128825620;128814012-128822128;128814012-128816509;128814012-128814440	128813829-128814012;128814440-nan;128816509-nan;128822128-nan;128825620-nan;128828867-128829020;128831854-nan;128837351-nan;128838829-nan;128839024-nan;128840143-nan;128840554-nan;128840587-nan;128840824-nan;128841979-128842079;128848931-128849031;128852917-128853038;128902619-128902629
27	ZNF746	gene:ENSG00000181220	ENSG00000181220:t:149191080-149191206	-3.325144030607872e-05;-0.3222097613084489;0.3246521569938419	3.6739331134960105e-06;0.9664212087188456;0.9692777797874976	0.9992144277010474;0.020220806324266705;0.018335170984436978	0.006;0.824;0.169	0.004;0.498;0.498	t|1e1.1o1|2e2.1o3|1e2.1o3	FALSE	TRUE	TRUE	3	3	1;1;0	7	-	149191161-149318219;149191206-149191295;149191161-149191295	149191080-149191206;149191295-149191594;149318219-149318229
28	ZNF746	gene:ENSG00000181220	ENSG00000181220:s:149191295-149191594	-0.31879551499210823;0.32134622845110006;-3.7510608277601436e-05	0.9540978149580227;0.9597732951560255;3.850412630292067e-06	0.029265047890039697;0.025101307840399142;0.9992190240840523	0.822;0.172;0.006	0.495;0.498;0.004	s|1e1.3o3|1e1.1o3|1e2.1o4	FALSE	TRUE	TRUE	3	3	1;0;1	7	-	149191206-149191295;149191161-149191295;149190063-149191295	149189950-149190063;149191080-149191206;149191295-149191594
29	MADD	gene:ENSG00000110514	ENSG00000110514:t:47295378-47295527	-3.206189040522118e-05;0.008081617397189628;-0.45092335523072324;-3.206189040522118e-05;-0.0016580357846344188;0.4248310200121217;-3.206189040522118e-05	3.155607178239875e-06;0.014042806332596445;0.9995317063700446;3.155607178239875e-06;0.0010813219497502206;0.9972905455880036;3.155607178239875e-06	0.9996156873702172;0.8710484700043621;0.00020780034009348913;0.9996156873702172;0.9534833220779433;0.001494361926202272;0.9996156873702172	0.003;0.083;0.623;0.003;0.043;0.242;0.003	0.002;0.122;0.180;0.002;0.035;0.659;0.002	t|1e1.1o1|1e2.1o2|1e3.1o6|1e3.4o6|1e3.5o6|1e4.1o2|1e5.1o1	TRUE	FALSE	TRUE	7	6	0;0;0;1;0;0;0	11	+	47290834-47295378;47291195-47295378;47291301-47295378;47291425-47295378;47291457-47295378;47291797-47295378;47293881-47295378	47290712-47290834;47290927-47291195;47291223-47291457;47291699-47291797;47293795-47293881;47295378-47295527
30	PIK3CG	gene:ENSG00000105851	ENSG00000105851:s:106505723-106505871	-0.0005803972823592659;0.5021774979509741;-0.5637798449063375;-0.0085259208420779;0.05793608794199827	0.0007058937687357378;0.9938444903810305;0.9759795099551296;0.016220296538310454;0.2271302630987344	0.9919843996136049;0.004866399968325782;0.019088250881163837;0.9214699494914355;0.537849880365404	0.017;0.017;0.850;0.100;0.017	0.006;0.521;0.291;0.006;0.175	s|2e1.2o2|1e2.1o4|2e2.1o4|1e3.2o4|2e3.2o4	TRUE	FALSE	TRUE	5	4	1;0;0;1;0	7	+	106505871-106506186;106505795-106507995;106505871-106507995;106505795-106512982;106505871-106512982	106505723-106505871;106505924-106506221;106507995-106510001;106512876-106513047
31	PIK3CG	gene:ENSG00000105851	ENSG00000105851:t:106507995-106510001	0.6228849666685733;-0.4960363023523844;-0.0006735805300477228;-0.00895145266636642	0.9989903938389186;0.9341549828820942;0.0009719219172354236;0.01759460738202774	0.0007858629879445745;0.053332640010033794;0.988882436748777;0.9159028759464332	0.021;0.854;0.021;0.104	0.648;0.331;0.008;0.008	t|1e1.1o5|1e1.3o5|1e2.1o2|1e2.2o2	TRUE	FALSE	TRUE	4	3	0;0;1;0	7	+	106505795-106507995;106505871-106507995;106506058-106507995;106506221-106507995	106505723-106505871;106505924-106506221;106507995-106510001
32	TP73-AS1	gene:ENSG00000227372	ENSG00000227372:t:3656797-3656966	-1.2539686844270434e-06;-1.2539686844270434e-06;0.0662560787286407;-1.2539686844270434e-06;-0.2795814042686049;-1.2539686844270434e-06;0.09610969199535546	4.439128237690735e-08;4.439128237690735e-08;0.2703812810842058;4.439128237690735e-08;0.9864371916297173;4.439128237690735e-08;0.46055914920225893	0.999954482208187;0.999954482208187;0.5520690534926921;0.999954482208187;0.0037328636451451347;0.999954482208187;0.24496680434312723	0.002;0.002;0.659;0.002;0.309;0.002;0.023	0.001;0.001;0.813;0.001;0.021;0.001;0.159	t|1e1.2o5|2e2.1o5|1e2.1o5|2e3.2o4|1e3.2o4|1e3.1o4|1e4.1o1	TRUE	TRUE	TRUE	7	5	1;1;0;1;0;1;1	1	-	3656951-3662171;3656966-3659368;3656951-3659368;3656966-3658994;3656951-3658994;3656951-3658935;3656951-3657784	3656797-3656966;3657784-3657937;3658935-3659081;3659368-3659547;3661945-3662802
33	TMED5	gene:ENSG00000117500	ENSG00000117500:t:93621593-93621664	-0.07673416169399107;-0.00023642099361888136;0.49829353788414144;-0.18579518346558474	0.29077569638585526;0.00018251934184331705;0.9998723096442649;0.5477299407633419	0.5513883734233168;0.9947127230230423;7.971946018731324e-05;0.3677369319687789	0.251;0.011;0.011;0.728	0.060;0.007;0.507;0.424	t|1e1.7o8|2e1.3o8|1e1.3o8|i	TRUE	TRUE	FALSE	4	2	1;1;0;0	1	-	93621641-93621974;93621664-93621857;93621641-93621857;93621664-93621665	93621593-93621664;93621665-93621800;93621801-93622040	93621665-93621800
34	XRRA1	gene:ENSG00000166435	ENSG00000166435:t:74632259-74632392	0.013958158654617282;-0.00013603478199445405;-0.00013603478199445405;-0.8477373322760787;0.7310742110284166;-0.00013603478199445405	0.02913505073499757;0.000497207732748578;0.000497207732748578;0.9999931323322095;0.9999721017372265;0.000497207732748578	0.8628524863902014;0.9926510018337558;0.9926510018337558;4.92101204985218e-06;2.054170048354855e-05;0.9926510018337558	0.011;0.011;0.011;0.944;0.011;0.011	0.114;0.009;0.009;0.114;0.746;0.009	t|1e1.1o5|1e2.6o7|1e2.2o7|1e3.1o2|1e4.2o2|1e4.1o2	TRUE	FALSE	TRUE	6	5	0;1;1;1;0;1	11	-	74632392-74647929;74632392-74644870;74632392-74644846;74632392-74641345;74632392-74638436;74632392-74638425	74632259-74632392;74638425-74638533;74641345-74641417;74644816-74644953;74647929-74648113
35	XRRA1	gene:ENSG00000166435	ENSG00000166435:s:74641345-74641417	0.6723348925619703;-0.6723348925619689	0.9928617909942624;0.9928617909942625	0.005648930509331039;0.005648930509331018	0.147;0.853	0.808;0.192	s|1e1.1o1|1e2.1o6	FALSE	FALSE	TRUE	2	3	0;1	11	-	74638533-74641345;74632392-74641345	74632259-74632392;74638425-74638533;74641345-74641417
36	TAPBPL	gene:ENSG00000139192	ENSG00000139192:t:6561971-6562463	-9.848053089919057e-07;-0.007858674305856909;-9.848053089919057e-07;0.027005539128366195;-9.848053089919057e-07;-0.24852795738246627;-9.848053089919057e-07;0.19788946735705198	7.408183199512208e-09;0.0018667732794633639;7.408183199512208e-09;0.013232499589772236;7.408183199512208e-09;0.953649794906647;7.408183199512208e-09;0.9213343157794054	0.9999854014074189;0.9059713414754386;0.9999854014074189;0.7249894488792176;0.9999854014074189;0.019493660131897683;0.9999854014074189;0.022471271841545574	0.001;0.059;0.001;0.001;0.001;0.905;0.001;0.030	0.001;0.031;0.001;0.077;0.001;0.648;0.001;0.236	t|2e1.1o1|2e2.1o1|2e3.1o1|2e4.1o7|1e4.2o7|2e4.2o7|2e4.7o7|2e5.1o2	TRUE	TRUE	TRUE	8	6	1;1;1;1;1;0;1;1	12	+	6560627-6562233;6560950-6562233;6560982-6562233;6561316-6562233;6561478-6561971;6561478-6562233;6561482-6562233;6561785-6562233	6560617-6560627;6560940-6560950;6560972-6560982;6561238-6561482;6561717-6561785;6561971-6562463
37	SLC22A5	gene:ENSG00000197375	ENSG00000197375:s:131719839-131720012	0.6650841956057714;-0.5664916144011516;-0.014260702993082741;0.00014699692494499588;0.00014699692494499588;0.00014699692494499588;0.00014699692494499588;0.00014699692494499588	0.9927927132576853;0.9966822218736796;0.02907902119619339;0.0004914573978600158;0.0004914573978600158;0.0004914573978600158;0.0004914573978600158;0.0004914573978600158	0.0058102063335156405;0.0026409364624212506;0.8595231376651724;0.9939229554023529;0.9939229554023529;0.9939229554023529;0.9939229554023529;0.9939229554023529	0.270;0.586;0.112;0.007;0.007;0.007;0.007;0.007	0.927;0.010;0.010;0.010;0.010;0.010;0.010;0.010	s|1e1.1o4|2e1.1o4|3e1.1o4|1e1.4o4|1e2.2o8|2e2.2o8|3e2.2o8|1e3.1o2	TRUE	TRUE	TRUE	8	4	0;1;1;1;1;1;1;1	5	+	131719993-131721020;131720006-131721020;131720012-131721020;131719993-131721068;131719993-131722717;131720006-131722717;131720012-131722717;131719993-131724613	131719839-131720012;131721020-131721191;131722551-131722843;131724613-131724713
38	SEC24B-AS1	gene:ENSG00000247950	ENSG00000247950:s:110352848-110352902	0.4660320747232952;5.286711549334742e-05;5.286711549334742e-05;-0.4581885022150849;5.286711549334742e-05;5.286711549334742e-05	0.9958547428087176;0.0001206020379349391;0.0001206020379349391;0.999469251219425;0.0001206020379349391;0.0001206020379349391	0.002825895881216446;0.996477155685869;0.996477155685869;0.0002985464593654452;0.996477155685869;0.996477155685869	0.505;0.005;0.005;0.473;0.005;0.005	0.967;0.007;0.007;0.007;0.007;0.007	s|1e1.2o2|1e1.1o2|1e2.4o5|1e2.2o5|1e3.1o3|1e4.1o5	FALSE	TRUE	TRUE	6	5	0;0;1;0;1;1	4	-	110351936-110352848;110351916-110352848;110335594-110352848;110335589-110352848;110326929-110352848;110317435-110352848	110317350-110317435;110326806-110326929;110335414-110335594;110351119-110351936;110352848-110352902
39	KLC1	gene:ENSG00000126214	ENSG00000126214:t:104153418-104153548	-9.658120692844289e-06;0.42101650574723526;-0.28098759067968715;-9.658120692844289e-06;-0.024985202052219747;-9.658120692844289e-06	4.898347483666878e-07;0.999970869139045;0.9084834027143243;4.898347483666878e-07;0.0851576478071692;4.898347483666878e-07	0.9998214521669884;7.093078059787226e-06;0.05840628970793649;0.9998214521669884;0.7624866368728277;0.9998214521669884	0.002;0.062;0.593;0.002;0.336;0.002	0.002;0.473;0.297;0.002;0.222;0.002	t|1e1.1o18|1e1.2o18|1e1.10o18|1e2.1o2|1e3.1o8|1e4.1o2	TRUE	FALSE	TRUE	6	5	1;0;0;1;1;1	14	+	104145824-104153418;104145855-104153418;104145882-104153418;104149725-104153418;104151373-104153418;104151891-104153418	104145646-104146135;104149706-104149802;104151323-104151653;104151724-104151891;104153418-104153548
40	FAM192A	gene:ENSG00000172775	ENSG00000172775:s:57219737-57219943	0.00971528614821857;-4.7436737066187616e-05;-4.7436737066187616e-05;-4.7436737066187616e-05;-4.7436737066187616e-05;-4.7436737066187616e-05;0.2795178938695029;-4.7436737066187616e-05;0.0007354210354490188;-4.7436737066187616e-05;-0.40329263827232154;-4.7436737066187616e-05;0.0030995199464021986;-4.7436737066187616e-05	0.012496202866314438;2.0550806957402055e-05;2.0550806957402055e-05;2.0550806957402055e-05;2.0550806957402055e-05;2.0550806957402055e-05;0.9897403708369548;2.0550806957402055e-05;0.00016491498021443872;2.0550806957402055e-05;0.986540955505997;2.0550806957402055e-05;0.0010958200033959462;2.0550806957402055e-05	0.8669792073062685;0.9991829298017629;0.9991829298017629;0.9991829298017629;0.9991829298017629;0.9991829298017629;0.0028243375923282456;0.9991829298017629;0.9911907920619137;0.9991829298017629;0.009242007082625014;0.9991829298017629;0.9671438341974931;0.9991829298017629	0.038;0.003;0.003;0.003;0.003;0.003;0.003;0.003;0.003;0.003;0.932;0.003;0.003;0.003	0.087;0.002;0.002;0.002;0.002;0.002;0.299;0.002;0.023;0.002;0.533;0.002;0.044;0.002	s|1e1.1o10|1e2.1o5|1e3.8o17|1e3.5o17|1e3.1o17|1e4.1o10|1e5.4o19|4e6.10o40|3e6.10o40|2e6.10o40|1e6.10o40|1e6.8o40|1e6.2o40|1e7.3o8	TRUE	TRUE	TRUE	14	8	1;1;1;1;1;1;1;1;1;1;0;1;1;1	16	-	57212764-57219737;57212444-57219737;57209612-57219737;57209593-57219737;57209502-57219737;57208600-57219737;57208198-57219737;57207781-57219919;57207781-57219895;57207781-57219765;57207781-57219737;57207727-57219737;57207708-57219737;57206786-57219737	57206688-57206786;57207582-57207793;57208081-57208202;57208353-57208798;57209451-57209781;57212414-57212469;57212469-57212764;57219737-57219943
41	TRAF3	gene:ENSG00000131323	ENSG00000131323:s:103243813-103244012	-0.04810401408300268;-5.83004840297279e-05;-0.006536545390211561;-0.0018509704410900293;-5.83004840297279e-05;-0.008778607247055509;-5.83004840297279e-05;0.2677249596567068;-5.83004840297279e-05	0.15227483024873367;1.5641098132718092e-05;0.004943855716476658;0.0007581375019489012;1.5641098132718092e-05;0.040219844257456935;1.5641098132718092e-05;0.9905823736388824;1.5641098132718092e-05	0.5886483976001012;0.9991554779683756;0.9340197618751567;0.9809482026654327;0.9991554779683756;0.83425315823811;0.9991554779683756;0.002068454912744832;0.9991554779683756	0.150;0.003;0.062;0.033;0.003;0.739;0.003;0.003;0.003	0.019;0.002;0.002;0.002;0.002;0.687;0.002;0.284;0.002	s|1e1.1o1|1e2.1o1|1e3.1o1|1e4.1o1|1e5.1o1|1e6.1o14|1e7.1o2|1e8.1o8|1e9.1o3	FALSE	FALSE	TRUE	9	10	1;1;1;1;0;0;1;0;1	14	+	103244012-103245067;103244012-103245152;103244012-103257543;103244012-103263003;103244012-103275345;103244012-103296671;103244012-103303147;103244012-103336522;103244012-103352526	103243813-103244012;103245067-nan;103245152-nan;103257543-103257633;103263003-103263128;103275345-103275466;103296671-103296809;103303147-103303194;103336522-103336783;103352526-103352606
42	PRRC2C	gene:ENSG00000117523	ENSG00000117523:s:171558508-171558744	-0.5846030876541917;-0.0006286154522619657;-0.0006286154522619657;0.6136572613396538	0.9893102775043262;0.0006896194722781472;0.0006896194722781472;0.9949652493541802	0.008211268837067354;0.9910003413989679;0.9910003413989679;0.0038287213297893185	0.804;0.018;0.018;0.161	0.229;0.007;0.007;0.757	s|2e1.1o4|2e1.3o4|1e2.2o9|2e2.2o9	TRUE	TRUE	TRUE	4	3	1;1;1;0	1	+	171558744-171560291;171558744-171560294;171558540-171560726;171558744-171560726	171558508-171558744;171560291-171560343;171560704-171562650
43	TMEM156	gene:ENSG00000121895	ENSG00000121895:s:39033846-39034063	-4.763090120201943e-06;-4.763090120201943e-06;0.3283346311372339;0.0001008728201358724;-4.763090120201943e-06;-0.001659597188049278;-4.763090120201943e-06;-4.763090120201943e-06;-4.763090120201943e-06;-4.763090120201943e-06;-0.31529842178979317;-4.763090120201943e-06;-4.763090120201943e-06;0.0001008728201358724	2.5630819249904995e-07;2.5630819249904995e-07;0.9639636721681244;2.541579358056904e-06;2.5630819249904995e-07;0.00023103021921124599;2.5630819249904995e-07;2.5630819249904995e-07;2.5630819249904995e-07;2.5630819249904995e-07;0.9554365539165474;2.5630819249904995e-07;2.5630819249904995e-07;2.541579358056904e-06	0.9999223654032536;0.9999223654032536;0.022334562135388678;0.9988413639262355;0.9999223654032536;0.983008572916967;0.9999223654032536;0.9999223654032536;0.9999223654032536;0.9999223654032536;0.027392601575201736;0.9999223654032536;0.9999223654032536;0.9988413639262355	0.001;0.001;0.390;0.001;0.001;0.032;0.001;0.001;0.001;0.001;0.568;0.001;0.001;0.001	0.001;0.001;0.709;0.012;0.001;0.001;0.001;0.001;0.001;0.001;0.255;0.001;0.001;0.012	s|1e1.1o1|1e2.2o2|1e2.1o2|1e3.1o1|1e4.1o1|1e5.1o1|1e6.1o1|1e7.1o1|1e8.1o1|1e9.1o1|1e10.2o10|1e10.1o10|1e11.3o9|1e12.1o3	FALSE	TRUE	TRUE	14	13	1;1;1;1;1;1;1;1;1;1;0;1;1;1	4	-	39033113-39033846;39030223-39033846;39030217-39033846;39027346-39033846;39024949-39033846;39017989-39033846;39016374-39033846;39008559-39033846;39005473-39033846;39003003-39033846;39000529-39033846;39000363-39033846;38995618-39033846;38990590-39033846	nan-39003003;nan-39005473;nan-39008559;nan-39016374;nan-39017989;38990471-38990608;38995355-38995618;38999907-39000529;39024601-39024949;39027255-39027346;39030065-39030223;39033048-39033113;39033846-39034063
44	NDUFAF6	gene:ENSG00000156170	ENSG00000156170:s:96044223-96044371	-7.73089241237746e-05;0.39142973582414997;-7.73089241237746e-05;-0.07442256794682474;-7.73089241237746e-05;-0.050093638185165684;-0.008076065516725246;-7.73089241237746e-05;-7.73089241237746e-05	2.6500499393123768e-05;0.9998524693511517;2.6500499393123768e-05;0.2745682716461047;2.6500499393123768e-05;0.18530209206873746;0.016426120868209042;2.6500499393123768e-05;2.6500499393123768e-05	0.998887632613518;7.137764724520836e-05;0.998887632613518;0.4363991456408195;0.998887632613518;0.6829621078219155;0.8735092876731001;0.998887632613518;0.998887632613518	0.004;0.004;0.004;0.170;0.004;0.704;0.104;0.004;0.004	0.002;0.413;0.002;0.002;0.002;0.523;0.056;0.002;0.002	s|1e1.1o4|2e1.1o4|3e1.1o4|1e2.1o4|2e2.1o4|1e3.1o6|2e3.1o6|3e3.1o6|2e4.1o6	TRUE	FALSE	TRUE	9	5	1;0;1;1;1;0;0;1;1	8	+	96044322-96046236;96044326-96046236;96044371-96046236;96044322-96046850;96044326-96046850;96044322-96047682;96044326-96047682;96044371-96047682;96044326-96053798	96044223-96044371;96046236-96046350;96046850-96046951;96047682-96047804;96053798-96053854
45	TPT1-AS1	gene:ENSG00000170919	ENSG00000170919:t:45918424-45918581	4.422250280166863e-05;4.422250280166863e-05;4.422250280166863e-05;4.422250280166863e-05;4.422250280166863e-05;0.2740932682374778;-0.4312902786960145;4.422250280166863e-05;-0.0016957221663812631;0.015184755640935813;4.422250280166863e-05;4.422250280166863e-05;4.422250280166863e-05	4.761595134581984e-05;4.761595134581984e-05;4.761595134581984e-05;4.761595134581984e-05;4.761595134581984e-05;0.7095352705793906;0.9996047705229338;4.761595134581984e-05;0.0007585599979230334;0.05603727916459894;4.761595134581984e-05;4.761595134581984e-05;4.761595134581984e-05	0.9985838825377704;0.9985838825377704;0.9985838825377704;0.9985838825377704;0.9985838825377704;0.2344966996499988;0.00022309113274077141;0.9985838825377704;0.980896579136094;0.8156469973598756;0.9985838825377704;0.9985838825377704;0.9985838825377704	0.002;0.002;0.002;0.002;0.002;0.377;0.445;0.002;0.032;0.120;0.002;0.002;0.002	0.003;0.003;0.003;0.003;0.003;0.731;0.003;0.003;0.003;0.221;0.003;0.003;0.003	t|7e1.1o2|1e2.2o28|2e2.2o28|3e2.2o28|5e2.2o28|6e2.2o28|7e2.2o28|2e2.20o28|5e2.20o28|6e2.20o28|7e2.20o28|6e3.1o2|7e3.1o2	TRUE	TRUE	TRUE	13	4	1;1;1;1;1;0;1;1;0;0;1;1;0	13	+	45915522-45918514;45915749-45918424;45915749-45918432;45915749-45918438;45915749-45918440;45915749-45918464;45915749-45918514;45915765-45918432;45915765-45918440;45915765-45918464;45915765-45918514;45917675-45918464;45917675-45918514	45915480-45915522;45915554-45915765;45917561-45917675;45918424-45918581
46	GANC	gene:ENSG00000214013	ENSG00000214013:s:42570656-42570790	-1.8409246616310397e-05;-1.8409246616310397e-05;-0.7558572653046827;-1.8409246616310397e-05;-1.8409246616310397e-05;0.08872264099171784;-1.8409246616310397e-05;-1.8409246616310397e-05;0.5323151752747817;-1.8409246616310397e-05;-1.8409246616310397e-05	0.0001689445467903023;0.0001689445467903023;0.9999116403678451;0.0001689445467903023;0.0001689445467903023;0.32863273955178457;0.0001689445467903023;0.0001689445467903023;0.9890044633063864;0.0001689445467903023;0.0001689445467903023	0.9968462408070936;0.9968462408070936;6.362119747571615e-05;0.9968462408070936;0.9968462408070936;0.4539901061171735;0.9968462408070936;0.9968462408070936;0.008342817058464928;0.9968462408070936;0.9968462408070936	0.005;0.005;0.900;0.005;0.005;0.005;0.005;0.005;0.057;0.005;0.005	0.005;0.005;0.163;0.005;0.005;0.215;0.005;0.005;0.584;0.005;0.005	s|2e1.1o1|2e2.1o5|2e2.2o5|2e2.4o5|2e2.5o5|2e3.1o3|2e3.3o3|1e4.1o9|2e4.1o9|2e5.1o2|2e6.1o3	TRUE	TRUE	TRUE	11	7	1;1;0;1;1;1;1;1;0;1;1	15	+	42570788-42571391;42570788-42573065;42570788-42573115;42570788-42573120;42570788-42573161;42570788-42575809;42570788-42576284;42570783-42579889;42570788-42579889;42570788-42589809;42570788-42598744	42570656-42570790;42571391-nan;42573065-42573331;42575809-42576587;42579889-42580016;42589809-42589854;42598744-42598825
47	CKAP2	gene:ENSG00000136108	ENSG00000136108:t:53035031-53035109	-0.4167136070261875;0.4280443328003368;-0.00024011338634911462;-0.00024011338634911462	0.991643885785836;0.9921820870167176;0.00011864672569635804;0.00011864672569635804	0.0046705919370994;0.0045156624823854095;0.9961942593721735;0.9961942593721735	0.455;0.510;0.009;0.009	0.046;0.944;0.005;0.005	t|1e1.1o6|2e1.1o6|3e1.1o6|2e2.1o1	FALSE	TRUE	TRUE	4	3	0;0;1;1	13	+	53030742-53035031;53030742-53035034;53030742-53035037;53031174-53035034	53030658-53030742;53031054-53031174;53035031-53035109
48	CKAP2	gene:ENSG00000136108	ENSG00000136108:s:53030658-53030742	-8.153809919157561e-05;-8.153809919157561e-05;-0.31501203956196977;0.5027309248584719;-8.153809919157561e-05;-0.07897344525351868	3.2111352643794264e-05;3.2111352643794264e-05;0.951250377328267;0.9994127974019188;3.2111352643794264e-05;0.31799197691890835	0.9983546509260071;0.9983546509260071;0.02880952042878726;0.00032866328622383276;0.9983546509260071;0.4396666562777126	0.005;0.005;0.364;0.431;0.005;0.187	0.003;0.003;0.044;0.922;0.003;0.024	s|1e1.1o2|1e1.2o2|1e2.1o4|1e2.2o4|1e2.4o4|1e3.1o2	FALSE	TRUE	TRUE	6	4	1;1;0;0;1;0	13	+	53030742-53031054;53030742-53031073;53030742-53035031;53030742-53035034;53030742-53035037;53030742-53035193	53030658-53030742;53031054-53031174;53035031-53035109;53035193-53036061
49	SLC16A1-AS1	gene:ENSG00000226419	ENSG00000226419:s:113499037-113500344	-0.0001932990426060173;-0.0001932990426060173;-0.0001932990426060173;-0.3358234646872786;-0.0001932990426060173;0.34704451924242086	8.929912792751704e-05;8.929912792751704e-05;8.929912792751704e-05;0.9743632205518599;8.929912792751704e-05;0.9978823354791021	0.997553848000694;0.997553848000694;0.997553848000694;0.017727838275280794;0.997553848000694;0.0013076977621503789	0.007;0.007;0.007;0.967;0.007;0.007	0.003;0.003;0.003;0.624;0.003;0.366	s|5e2.1o1|1e3.1o6|2e3.1o6|3e3.1o6|4e3.1o6|5e3.1o6	TRUE	FALSE	TRUE	6	3	1;1;1;0;1;0	1	+	113500344-113501643;113499213-113503099;113499543-113503099;113499578-113503099;113499995-113503099;113500344-113503099	113499037-113500344;113501643-113501736;113503099-113503197
50	SLC16A1-AS1	gene:ENSG00000226419	ENSG00000226419:t:113503099-113503197	-0.00021480061487314672;-0.00021480061487314672;-0.33483621871470415;-0.00021480061487314672;0.3520668408046427;-0.00021480061487314672	0.00010370544893597333;0.00010370544893597333;0.9637101210275161;0.00010370544893597333;0.9969206024672467;0.00010370544893597333	0.9973912166723214;0.9973912166723214;0.02593290950812699;0.9973912166723214;0.0020224755793074546;0.9973912166723214	0.007;0.007;0.964;0.007;0.007;0.007	0.003;0.003;0.621;0.003;0.376;0.003	t|1e1.1o8|1e1.2o8|1e1.3o8|1e1.6o8|1e1.7o8|1e2.1o1	TRUE	FALSE	TRUE	6	3	1;1;0;1;0;1	1	+	113499213-113503099;113499543-113503099;113499578-113503099;113499995-113503099;113500344-113503099;113501736-113503099	113499037-113500344;113501643-113501736;113503099-113503197
51	NUTM2A-AS1	gene:ENSG00000223482	ENSG00000223482:s:89005872-89005993	0.6050871007220573;-2.5463461863223775e-06;-2.5463461863223775e-06;-2.5463461863223775e-06;-2.5463461863223775e-06;-2.5463461863223775e-06;-2.5463461863223775e-06;-0.5388630754261989;-2.5463461863223775e-06;-2.5463461863223775e-06;-2.5463461863223775e-06;-2.5463461863223775e-06;-2.5463461863223775e-06;-2.5463461863223775e-06;-0.0036120836430787663;-2.5463461863223775e-06;-2.5463461863223775e-06;-…	0.9983502227026698;6.624190032587133e-05;6.624190032587133e-05;6.624190032587133e-05;6.624190032587133e-05;6.624190032587133e-05;6.624190032587133e-05;0.9998645881178054;6.624190032587133e-05;6.624190032587133e-05;6.624190032587133e-05;6.624190032587133e-05;6.624190032587133e-05;6.624190032587133e-05;0.0034935119089575728;6.624190032587133e-05;6.624190032587133e-05;6.624190032587133e-05;6.6241900…	0.0012244612144719786;0.9986510974917079;0.9986510974917079;0.9986510974917079;0.9986510974917079;0.9986510974917079;0.9986510974917079;8.054133328028179e-05;0.9986510974917079;0.9986510974917079;0.9986510974917079;0.9986510974917079;0.9986510974917079;0.9986510974917079;0.9628109795321375;0.9986510974917079;0.9986510974917079;0.9986510974917079;0.9986510974917079;0.9986510974917079;0.99865109749…	0.352;0.002;0.002;0.002;0.002;0.002;0.002;0.552;0.002;0.002;0.002;0.002;0.002;0.002;0.052;0.002;0.002;0.002;0.002;0.002;0.002;0.002;0.002	0.952;0.002;0.002;0.002;0.002;0.002;0.002;0.002;0.002;0.002;0.002;0.002;0.002;0.002;0.002;0.002;0.002;0.002;0.002;0.002;0.002;0.002;0.002	s|1e1.4o6|1e1.3o6|1e1.2o6|1e1.1o6|1e2.1o1|1e3.1o1|1e4.5o7|1e4.1o7|1e5.1o1|1e6.1o1|1e7.1o1|1e8.2o4|1e8.1o4|1e9.1o1|1e10.1o2|1e11.1o1|1e12.1o2|1e13.1o2|1e14.1o5|1e15.1o2|1e16.1o2|1e17.1o2|1e18.1o1	FALSE	TRUE	TRUE	23	19	0;1;1;1;1;1;0;0;1;0;1;1;1;1;1;1;1;1;0;1;1;1;1	10	-	89005612-89005872;89005611-89005872;89004846-89005872;89004507-89005872;89000288-89005872;88999626-89005872;88998629-89005872;88998606-89005872;88996472-89005872;88995672-89005872;88984300-89005872;88975930-89005872;88975915-89005872;88974035-89005872;88968269-89005872;88968266-89005872;88967565-89005872;88966400-89005872;88963693-89005872;88962837-89005872;88952602-89005872;88949781-89005872;888…	nan-88966400;nan-88967565;nan-88968266;nan-88968269;nan-88974035;nan-88984300;nan-88996472;nan-88999626;nan-89000288;88880794-88880804;88949771-88949781;88952592-88952602;88962827-88962837;88963632-88963693;88975751-88975955;88995384-88995672;88998424-88998629;89003889-89005612;89005872-89005993
52	ISG20L2	gene:ENSG00000143319	ENSG00000143319:t:156696698-156697600	-0.22662268185116413;0.30627948084540607;-0.0014607530256501935;-0.0014607530256501935;-1.0374066181054344e-05;-8.220755299163038e-06	0.874449542588216;0.9838414964798504;0.0001666731882914351;0.0001666731882914351;4.283753268228556e-07;3.3259467237250587e-07	0.06567135742689778;0.006459305447668981;0.9850184446027932;0.9850184446027932;0.9998468223176329;0.9998789822564248	0.343;0.597;0.031;0.031;0.002;0.002	0.095;0.899;0.002;0.002;0.002;0.001	t|3e1.1o4|2e1.1o4|1e1.1o4|2e2.1o2|2e3.1o2|i	FALSE	TRUE	TRUE	6	4	1;0;1;1;1;0	1	-	156697600-156698207;156697561-156698207;156696761-156698207;156697561-156698146;156697561-156698069;156697600-156697601	156696698-156697600;156698069-156698079;156698146-156698156;156698207-156698591
53	HINFP	gene:ENSG00000172273	ENSG00000172273:t:118994278-118994394	0.34319259826634074;-0.3431925982663393	0.9656372336449477;0.9656372336449477	0.016128335894735186;0.01612833589473517	0.625;0.375	0.987;0.013	t|1e1.1o7|1e2.2o5	FALSE	FALSE	TRUE	2	3	1;1	11	+	118992349-118994278;118992723-118994278	118992297-118992359;118992493-118992723;118994278-118994394
54	HINFP	gene:ENSG00000172273	ENSG00000172273:s:118992297-118992359	-0.019145075363400973;-2.1316419467341718e-05;0.41744802487584054;-0.2866996517436954;-2.1316419467341718e-05;-2.1316419467341718e-05;-2.1316419467341718e-05	0.022712095168249364;6.073163334721579e-06;0.9805853025502177;0.8212161535479516;6.073163334721579e-06;6.073163334721579e-06;6.073163334721579e-06	0.8092589513904949;0.9993419440507536;0.013205540094479449;0.13421727135484285;0.9993419440507536;0.9993419440507536;0.9993419440507536	0.089;0.003;0.258;0.644;0.003;0.003;0.003	0.003;0.003;0.669;0.315;0.003;0.003;0.003	s|1e1.1o2|1e1.2o2|1e2.1o2|1e3.1o15|2e3.1o15|1e4.2o8|1e5.2o4	TRUE	TRUE	TRUE	7	6	0;1;1;0;1;1;1	11	+	118992349-118992493;118992349-118992498;118992349-118994278;118992349-118997645;118992359-118997645;118992349-119001435;118992349-119002245	118992297-118992359;118992493-118992723;118994278-118994394;118997645-118997835;119001366-119001664;119002119-119002356
55	PHKB	gene:ENSG00000102893	ENSG00000102893:s:47495034-47495415	0.09226956433575276;-6.215710598943448e-05;0.38506421447181377;-0.042601539904481324;-0.4717387542099336;-6.215710598943448e-05;-6.215710598943448e-05;-6.215710598943448e-05;0.01735309430494451;-6.215710598943448e-05;-6.215710598943448e-05;-6.215710598943448e-05;-6.215710598943448e-05	0.40181476665953986;2.008899347001658e-05;0.9770594826455595;0.12161132781643022;0.9951347863996075;2.008899347001658e-05;2.008899347001658e-05;2.008899347001658e-05;0.05098338718803462;2.008899347001658e-05;2.008899347001658e-05;2.008899347001658e-05;2.008899347001658e-05	0.2557289919505599;0.9992427852974555;0.01589610749519701;0.6325186516451119;0.003064511294010086;0.9992427852974555;0.9992427852974555;0.9992427852974555;0.7982533222342428;0.9992427852974555;0.9992427852974555;0.9992427852974555;0.9992427852974555	0.003;0.003;0.110;0.146;0.646;0.003;0.003;0.003;0.074;0.003;0.003;0.003;0.003	0.157;0.001;0.493;0.001;0.185;0.001;0.001;0.001;0.153;0.001;0.001;0.001;0.001	s|2e1.2o2|2e2.2o10|2e2.3o10|1e2.5o10|2e2.5o10|3e2.5o10|2e2.9o10|2e2.10o10|2e3.1o2|2e4.1o2|2e5.1o3|3e5.1o3|2e6.1o3	TRUE	TRUE	TRUE	13	7	0;1;0;1;0;1;1;1;0;1;1;1;1	16	+	47495337-47496252;47495337-47497009;47495337-47497793;47495291-47497810;47495337-47497810;47495415-47497810;47495337-47497815;47495337-47497835;47495337-47531310;47495337-47581344;47495337-47644737;47495415-47644737;47495337-47682444	47495034-47495415;47496023-47496363;47496578-47497904;47531310-47531399;47581344-47581459;47644737-47644831;47682444-47682527
56	BCL2L1	gene:ENSG00000171552	ENSG00000171552:t:30309458-30310151	0.010159984355627519;0.0023519593446694504;-3.81431609457071e-06;-3.81431609457071e-06;5.15755348621199e-05;0.009473116019025184;-0.4462117199629213;0.0810103215333055;-3.81431609457071e-06;5.15755348621199e-05;-3.81431609457071e-06;-3.81431609457071e-06;0.04607038273365263;0.010851409026629361	0.0024377064662859443;0.004291197196732068;1.3258510805069806e-07;1.3258510805069806e-07;7.232835604114688e-07;0.010684120838478991;0.9999903556713994;0.3594224694297979;1.3258510805069806e-07;7.232835604114688e-07;1.3258510805069806e-07;1.3258510805069806e-07;0.06881010996763724;0.03810214934005465	0.8961760313662034;0.9113755151697469;0.9999474335910158;0.9999474335910158;0.9993805253282698;0.8774288985652565;1.5132065227518865e-06;0.4077979362352653;0.9999474335910158;0.9993805253282698;0.9999474335910158;0.9999474335910158;0.5399018913982836;0.8363893962725968	0.001;0.088;0.001;0.001;0.001;0.059;0.490;0.059;0.001;0.001;0.001;0.001;0.001;0.296	0.061;0.102;0.001;0.001;0.011;0.102;0.061;0.199;0.001;0.011;0.001;0.001;0.102;0.344	t|4e1.5o6|3e1.5o6|4e1.3o6|3e1.3o6|4e1.1o6|3e1.1o6|4e2.1o2|3e2.1o2|3e3.6o6|4e3.4o6|3e3.4o6|4e3.1o6|3e3.1o6|i	TRUE	TRUE	TRUE	14	4	0;0;1;1;0;0;0;0;1;0;1;1;1;0	20	-	30310151-30311667;30310133-30311667;30310151-30311651;30310133-30311651;30310151-30311538;30310133-30311538;30310151-30310421;30310133-30310421;30310133-30310280;30310151-30310247;30310133-30310247;30310151-30310220;30310133-30310220;30310151-30310152	30309458-30310151;30310152-30310219;30310220-30310400;30310421-30310901;30311538-30311792	30310152-30310219
57	HKR1	gene:ENSG00000181666	ENSG00000181666:t:37814435-37814472	6.0311882446303596e-05;-0.004386510082308294;0.2661838782273155;-0.2135963002500456	4.446847504434632e-05;0.001993871432606366;0.9510415156585658;0.9026141533364715	0.9974596661575196;0.9523902388547429;0.025891679090650693;0.0336603685680712	0.006;0.050;0.698;0.250	0.007;0.007;0.979;0.007	t|1e1.1o1|1e2.1o3|1e3.1o2|1e4.1o1	FALSE	FALSE	TRUE	4	5	0;0;0;1	19	+	37804214-37814435;37809088-37814435;37813134-37814435;37813381-37814435	37803739-37804214;37808813-37809088;37813087-37813134;37813340-37813381;37814435-37814472
58	IL12RB1	gene:ENSG00000096996	ENSG00000096996:t:18169805-18170566	6.443868196010958e-05;-0.04343045023692382;0.2671493740773157;-0.04192528402968302	8.61156225513522e-06;0.1677974632827241;0.9838453183637901;0.15761347202977782	0.9990960949984773;0.6865099746498458;0.002663650277355137;0.703876617836251	0.003;0.406;0.003;0.592	0.005;0.256;0.291;0.449	t|1e1.1o2|1e2.3o3|2e2.1o3|1e2.1o3	TRUE	TRUE	TRUE	4	3	1;1;1;0	19	-	18170423-18171932;18170423-18170717;18170566-18170704;18170423-18170704	18169805-18170566;18170704-18170895;18171932-18172007
59	PNPLA8	gene:ENSG00000135241	ENSG00000135241:s:108166473-108166762	0.3004285060254114;-6.329125551894914e-05;-6.329125551894914e-05;-0.2814765831040229;-6.329125551894914e-05;-6.329125551894914e-05;-6.329125551894914e-05	0.9744816842402995;2.738441002225782e-05;2.738441002225782e-05;0.9735218857384048;2.738441002225782e-05;2.738441002225782e-05;2.738441002225782e-05	0.0105946757744275;0.998599453679474;0.998599453679474;0.006291172390477828;0.998599453679474;0.998599453679474;0.998599453679474	0.671;0.004;0.004;0.307;0.004;0.004;0.004	0.982;0.003;0.003;0.003;0.003;0.003;0.003	s|1e1.1o2|1e2.2o3|2e3.5o9|1e3.5o9|1e3.2o9|1e4.1o4|1e5.1o5	TRUE	TRUE	TRUE	7	6	0;1;0;0;0;1;1	7	-	108161965-108166473;108158745-108166473;108156018-108166494;108156018-108166473;108155891-108166473;108154737-108166473;108143086-108166473	108142935-108143086;108154588-108154737;108154880-108156018;108158634-108158745;108161920-108161965;108166473-108166762
60	TTLL1	gene:ENSG00000100271	ENSG00000100271:s:43471480-43471596	-0.007699658996394566;0.23994350698658162;-0.014710002208768717;-0.04154444372257152	0.01694964307965027;0.9631607902468184;0.008217643036812987;0.1588278058790687	0.8669867592135102;0.01001159661466726;0.8499507810724003;0.6905930532831406	0.150;0.017;0.072;0.762	0.110;0.270;0.004;0.617	s|1e1.1o1|1e2.1o1|1e3.1o2|1e4.1o6	FALSE	FALSE	TRUE	4	5	1;1;0;0	22	-	43470679-43471480;43468078-43471480;43466248-43471480;43465850-43471480	43465610-43465850;43466177-43466248;43467932-43468078;43470504-43470679;43471480-43471596
61	METTL21A	gene:ENSG00000144401	ENSG00000144401:t:208446077-208446884	-4.209825564497357e-05;-0.005655298205401331;0.4208506888219833;0.0015128076128380764;-0.04256835689934342;-4.209825564497357e-05;-0.08632226887856809;-0.00849246148484307;-4.209825564497357e-05	4.243608984040615e-05;0.047730399000302084;0.9915715076141267;0.0006508514471003778;0.12239872198293186;4.243608984040615e-05;0.34703441120476075;0.008995167006979157;4.243608984040615e-05	0.9983414410314144;0.8272954088058248;0.005532294480694496;0.9825464179482802;0.6324880922569216;0.9983414410314144;0.46080618147287766;0.9145898539663838;0.9983414410314144	0.004;0.521;0.038;0.004;0.142;0.004;0.214;0.073;0.004	0.003;0.460;0.457;0.032;0.003;0.003;0.032;0.003;0.003	t|1e1.1o4|2e2.1o13|1e2.1o13|2e3.1o9|1e3.1o9|2e4.3o8|2e5.1o2|1e5.1o2|2e6.1o1	FALSE	TRUE	TRUE	9	7	1;0;0;1;1;1;1;1;1	2	-	208446670-208488953;208446884-208486530;208446670-208486530;208446884-208485365;208446670-208485365;208446884-208477422;208446884-208461803;208446670-208461803;208446884-208459333	208446077-208446884;208459333-208459450;208461803-208461838;208473839-208478167;208485365-208485514;208486530-208486641;208488953-208489290
62	FRS2	gene:ENSG00000166225	ENSG00000166225:s:69864129-69864310	-0.0001054118637429059;-0.0001054118637429059;0.3864461361534032;0.0018088287909761927;-0.0001054118637429059;-0.0001054118637429059;-0.4173601623369863;-0.0001054118637429059	0.00011383471515973754;0.00011383471515973754;0.9959941809670426;0.001050802746629576;0.00011383471515973754;0.00011383471515973754;0.9791496717192115;0.00011383471515973754	0.9971404133123113;0.9971404133123113;0.002334716825315026;0.9777079669799446;0.9971404133123113;0.9971404133123113;0.01517855227889886;0.9971404133123113	0.006;0.006;0.006;0.006;0.006;0.006;0.960;0.006	0.004;0.004;0.401;0.036;0.004;0.004;0.538;0.004	s|1e1.1o1|1e2.1o1|1e3.1o5|1e4.1o3|1e5.1o1|1e6.1o1|1e7.2o10|1e8.2o8	FALSE	FALSE	TRUE	8	9	1;0;0;0;1;1;0;0	12	+	69864310-69867808;69864310-69874079;69864310-69879982;69864310-69885318;69864310-69910044;69864310-69924070;69864310-69924645;69864310-69955960	69864129-69864310;69867808-69867988;69874079-69874139;69879982-69880077;69885318-69885431;69910044-69910301;69924070-69924145;69924603-69924740;69955928-69956054
63	TRIP12	gene:ENSG00000153827	ENSG00000153827:t:230724092-230724290	0.6636711641348352;-0.00041529754802108697;-0.00041529754802108697;-0.6469446975481126	0.9996135660824146;0.0003336320070730488;0.0003336320070730488;0.9991862807062121	0.000278673963024499;0.9936857463300748;0.9936857463300748;0.0005926345412943235	0.118;0.013;0.013;0.855	0.764;0.006;0.006;0.223	t|2e1.1o8|1e1.1o8|2e2.2o2|2e2.1o2	TRUE	TRUE	TRUE	4	3	0;1;1;0	2	-	230724290-230744698;230724287-230744698;230724290-230725123;230724290-230725122	230724092-230724290;230725122-230725251;230744698-230744844
64	RFPL3S	gene:ENSG00000205853	ENSG00000205853:s:32763677-32763701	-3.723575371477415e-05;-0.30771894870775457;0.3118297355235751	0.00032042089536835224;0.9249610531644108;0.9564392847661572	0.9914753456311524;0.04914397324544262;0.02382220521575949	0.012;0.975;0.012	0.012;0.649;0.346	s|1e1.1o1|1e2.1o1|1e3.1o2	FALSE	FALSE	TRUE	3	4	1;0;0	22	-	32761482-32763677;32759045-32763677;32756826-32763677	nan-32761482;32755893-32756826;32758788-32759045;32763677-32763701
65	ZNF616	gene:ENSG00000204611	ENSG00000204611:s:52627176-52627302	-0.5964206601533484;0.5951868293382693;-0.0002100313183975537	0.9943565228071831;0.9943138795686745;0.0006574179694611537	0.004259661078473753;0.0043026831102680055;0.9878131959838322	0.767;0.217;0.017	0.184;0.801;0.014	s|1e1.1o1|1e2.2o7|1e2.1o7	FALSE	TRUE	TRUE	3	3	0;0;1	19	-	52625710-52627176;52620277-52627176;52620276-52627176	52616344-52620277;52625418-52625710;52627176-52627302
66	PCK2	gene:ENSG00000100889	ENSG00000100889:t:24566101-24566346	1.8549491959324486e-05;0.0035358401879238303;1.8549491959324486e-05;-0.4131870437168773;1.8549491959324486e-05;0.35490152642438144;1.8549491959324486e-05;1.8549491959324486e-05;1.8549491959324486e-05;1.8549491959324486e-05;1.8549491959324486e-05	2.8911074143407065e-06;0.0013803369143945518;2.8911074143407065e-06;0.9962532911476449;2.8911074143407065e-06;0.9818016239986651;2.8911074143407065e-06;2.8911074143407065e-06;2.8911074143407065e-06;2.8911074143407065e-06;2.8911074143407065e-06	0.9996875999732021;0.9639116951948528;0.9996875999732021;0.002004425718507452;0.9996875999732021;0.010384564701690224;0.9996875999732021;0.9996875999732021;0.9996875999732021;0.9996875999732021;0.9996875999732021	0.001;0.001;0.001;0.868;0.001;0.116;0.001;0.001;0.001;0.001;0.001	0.002;0.046;0.002;0.462;0.002;0.469;0.002;0.002;0.002;0.002;0.002	t|1e1.1o1|1e2.1o3|1e3.1o9|1e3.2o9|1e3.9o9|1e4.1o10|2e4.1o10|1e4.10o10|1e5.1o1|1e6.1o1|1e7.1o1	TRUE	TRUE	TRUE	11	8	0;0;1;0;1;0;1;1;1;1;1	14	+	24563342-24566101;24563463-24566101;24563609-24566101;24563643-24566101;24563945-24566101;24564054-24566101;24564054-24566189;24564210-24566101;24564571-24566101;24564587-24566101;24564794-24566101	24563262-24563342;24563347-24563463;24563510-24563945;24563975-24564210;24564352-24564571;24564576-24564587;24564723-24564794;24566101-24566346
67	ANKRD10	gene:ENSG00000088448	ENSG00000088448:t:111546082-111546549	0.3400966996892131;-0.00525913589695602;2.257576936860246e-06;2.257576936860246e-06;2.257576936860246e-06;2.257576936860246e-06;-0.23636988408167126	0.9781232087794766;0.0031004495605070617;2.4159833606019807e-05;2.4159833606019807e-05;2.4159833606019807e-05;2.4159833606019807e-05;0.7491375095339929	0.012279349330265935;0.9454128585671671;0.9985888566580499;0.9985888566580499;0.9985888566580499;0.9985888566580499;0.18508271482177796	0.030;0.056;0.004;0.004;0.004;0.004;0.901	0.374;0.004;0.004;0.004;0.004;0.004;0.622	t|2e1.1o20|1e1.1o20|2e2.1o2|2e3.2o3|2e4.2o4|2e5.1o1|2e6.1o1	FALSE	TRUE	TRUE	7	7	0;1;1;1;1;1;1	13	-	111546549-111558380;111546511-111558380;111546549-111557092;111546549-111555823;111546549-111552877;111546549-111552272;111546549-111546632	111546082-111546549;111546632-111546740;111552272-111552365;111552620-111553041;111555819-111555886;111557092-111557580;111558380-111558471
68	SPOP	gene:ENSG00000121067	ENSG00000121067:t:47714121-47714171	0.31867908200362727;0.002381300014650201;-0.2555028681489986;-2.0734089322208902e-05;-0.015192727278061043;0.00016742472143751742;-2.0734089322208902e-05	0.9541473576207966;0.0015732044662548864;0.8911915009124277;1.943686697962013e-06;0.012724009582460947;9.195871273660843e-06;1.943686697962013e-06	0.02803484423825381;0.9310419597529621;0.0651392230142468;0.9996736805673327;0.8468470431997712;0.9977496702852237;0.9996736805673327	0.484;0.040;0.387;0.003;0.077;0.003;0.003	0.804;0.053;0.121;0.002;0.002;0.015;0.002	t|1e1.1o12|1e2.1o6|1e3.2o6|1e3.1o6|1e4.1o1|1e5.1o2|1e6.1o1	TRUE	FALSE	TRUE	7	7	0;0;0;1;1;0;1	17	-	47714171-47755295;47714171-47753257;47714171-47745389;47714171-47745380;47714171-47724288;47714171-47723478;47714171-47714329	47714121-47714171;47714329-47714400;47723478-47723992;47724288-47724484;47745380-47745440;47753257-47753378;47755295-47755596
69	ZFYVE28	gene:ENSG00000159733	ENSG00000159733:s:2355660-2355800	-8.446039465586126e-05;-8.446039465586126e-05;-0.5276979654203522;-8.446039465586126e-05;-8.446039465586126e-05;-8.446039465586126e-05;0.54271280146065	2.2691859103901473e-05;2.2691859103901473e-05;0.9999800624448257;2.2691859103901473e-05;2.2691859103901473e-05;2.2691859103901473e-05;0.9999663734046917	0.9988662569230887;0.9988662569230887;7.278094601992358e-06;0.9988662569230887;0.9988662569230887;0.9988662569230887;1.3611144170123294e-05	0.004;0.004;0.551;0.004;0.004;0.004;0.424	0.002;0.002;0.033;0.002;0.002;0.002;0.956	s|1e1.4o4|1e1.3o4|1e1.1o4|1e2.1o1|1e3.1o1|1e4.6o6|1e4.1o6	FALSE	TRUE	TRUE	7	5	1;1;1;1;1;1;0	4	-	2345180-2355660;2345087-2355660;2344930-2355660;2344738-2355660;2344719-2355660;2343825-2355660;2343342-2355660	nan-2344719;nan-2344738;2343049-2343825;2344809-2345180;2355660-2355800
70	PIAS3	gene:ENSG00000131788	ENSG00000131788:t:145578062-145578307	0.3538425905975617;-0.446970555075228;-3.026042986721861e-05;-3.026042986721861e-05;0.002425072082525164;0.006271821786491083;-3.026042986721861e-05	0.9819829156383247;0.9979786465626412;9.006322137108138e-06;9.006322137108138e-06;0.0005984077895641324;0.0027414177803951278;9.006322137108138e-06	0.011085615026188595;0.0012024682569918843;0.9992191935671025;0.9992191935671025;0.9741926252194677;0.9352035003960247;0.9992191935671025	0.073;0.910;0.003;0.003;0.003;0.003;0.003	0.425;0.470;0.003;0.003;0.040;0.058;0.003	t|1e1.1o2|1e2.1o3|1e2.2o3|1e2.3o3|1e3.1o1|1e4.1o1|1e5.1o1	TRUE	FALSE	TRUE	7	6	0;0;1;1;1;1;0	1	+	145575404-145578062;145576102-145578062;145576146-145578062;145576214-145578062;145576719-145578062;145576744-145578062;145577753-145578062	nan-145576719;nan-145576744;145575233-145575404;145575989-145576214;145577652-145577753;145578062-145578307
71	FAM222B	gene:ENSG00000173065	ENSG00000173065:t:27093604-27094122	-5.0418406941841326e-05;0.0005818926133774817;-5.0418406941841326e-05;-0.1655410502608878;0.006283302840460062;-5.0418406941841326e-05;-0.006491530356460504;-0.006491530356460504;0.32488975652984065;-5.0418406941841326e-05;-5.0418406941841326e-05;-5.0418406941841326e-05	1.1163416827138318e-05;0.03185601972071729;1.1163416827138318e-05;0.6380868336890722;0.019372506554110356;1.1163416827138318e-05;0.004918524071266491;0.004918524071266491;0.9923465046340364;1.1163416827138318e-05;1.1163416827138318e-05;1.1163416827138318e-05	0.999447399691058;0.8463276732962558;0.999447399691058;0.23692838608145816;0.8619540955669841;0.999447399691058;0.9346687543985557;0.9346687543985557;0.004330626104925416;0.999447399691058;0.999447399691058;0.999447399691058	0.003;0.396;0.003;0.301;0.124;0.003;0.063;0.063;0.033;0.003;0.003;0.003	0.001;0.402;0.001;0.072;0.153;0.001;0.001;0.001;0.354;0.001;0.001;0.001	t|1e1.1o2|1e2.2o8|2e2.1o8|1e3.1o7|1e4.2o5|1e4.1o5|1e5.1o2|1e6.1o1|1e7.1o3|1e8.1o1|1e9.1o1|1e10.1o1	TRUE	TRUE	TRUE	12	11	0;0;0;0;0;0;1;1;0;1;0;1	17	-	27093725-27181968;27093725-27169700;27093735-27169676;27093725-27161311;27093725-27139227;27093725-27139176;27093725-27133520;27093725-27131074;27093725-27117396;27093725-27106880;27093725-27104066;27093725-27100733	27093604-27094122;27100733-27100808;27104066-27104167;27106880-nan;27117396-27117461;27131074-nan;27133520-27133606;27139176-27139453;27161311-27161344;27169676-27169857;27181968-27182250
72	SLC38A9	gene:ENSG00000177058	ENSG00000177058:s:55007180-55007327	0.4499719429383128;0.0016963287319776222;-0.00011728020806508891;-0.00011728020806508891;-0.00011728020806508891;-0.4621333869568782;-0.00011728020806508891;-0.00011728020806508891	0.9673078145073583;0.0009534123873114742;0.00011629797234959907;0.00011629797234959907;0.00011629797234959907;0.9643395062947979;0.00011629797234959907;0.00011629797234959907	0.02490364824723126;0.9787080947454647;0.9971385967824503;0.9971385967824503;0.9971385967824503;0.027410402561258373;0.9971385967824503;0.9971385967824503	0.101;0.006;0.006;0.006;0.006;0.863;0.006;0.006	0.549;0.035;0.004;0.004;0.004;0.398;0.004;0.004	s|2e1.1o4|1e1.1o4|2e2.1o1|2e3.3o4|2e3.1o4|2e4.2o8|1e4.2o8|2e5.1o7	TRUE	TRUE	TRUE	8	6	0;1;1;0;1;0;0;0	5	-	55000262-55007280;55000262-55007180;54999987-55007280;54998722-55007280;54998719-55007280;54993820-55007280;54993820-55007180;54968523-55007280	nan-54999987;54968391-54968650;54993674-54993822;54998567-54998722;55000150-55000262;55007180-55007327
73	ARFIP1	gene:ENSG00000164144	ENSG00000164144:t:153750746-153750878	-0.00014821357755409267;0.47825099580903624;-0.00014821357755409267;-0.3075702311841129;-0.003694142797449068;-0.0069099498677785585;-0.00014821357755409267;-0.00014821357755409267	8.906216016395998e-05;0.9966791408550824;8.906216016395998e-05;0.7959883899322011;0.003275070060297724;0.01510383983670396;8.906216016395998e-05;8.906216016395998e-05	0.9977234160580496;0.0023381129840698207;0.9977234160580496;0.16168221190086063;0.9624497753894464;0.8857756449210444;0.9977234160580496;0.9977234160580496	0.006;0.051;0.006;0.778;0.051;0.097;0.006;0.006	0.003;0.526;0.003;0.412;0.003;0.048;0.003;0.003	t|2e1.1o1|2e2.1o18|1e2.6o18|2e2.6o18|2e3.1o1|2e4.1o1|2e5.1o1|2e6.1o1	TRUE	TRUE	TRUE	8	7	1;0;1;0;1;1;1;1	4	+	153700474-153750777;153701243-153750777;153701378-153750746;153701378-153750777;153706124-153750777;153712027-153750777;153728400-153750777;153730885-153750777	153700464-153700474;153701089-153701378;153706019-153706124;153711907-153712027;153728011-153728400;153730342-153730885;153750746-153750878
74	ZBTB25	gene:ENSG00000089775	ENSG00000089775:s:64957079-64957258	0.1506537516175615;-2.404810316291168e-06;0.012624455260940016;-2.404810316291168e-06;-2.404810316291168e-06;-2.404810316291168e-06;-2.404810316291168e-06;-0.25362965003921834;-2.404810316291168e-06;-2.404810316291168e-06	0.6235213572471722;3.604191257171918e-08;0.021347653016953468;3.604191257171918e-08;3.604191257171918e-08;3.604191257171918e-08;3.604191257171918e-08;0.9740969085154411;3.604191257171918e-08;3.604191257171918e-08	0.24918667196527908;0.9999701520573492;0.8446618673838194;0.9999701520573492;0.9999701520573492;0.9999701520573492;0.9999701520573492;0.007558801077427568;0.9999701520573492;0.9999701520573492	0.587;0.001;0.098;0.001;0.001;0.001;0.001;0.307;0.001;0.001	0.791;0.001;0.144;0.001;0.001;0.001;0.001;0.058;0.001;0.001	s|1e1.14o15|1e1.13o15|1e1.10o15|1e1.7o15|1e1.2o15|1e2.3o4|1e2.1o4|1e3.1o4|1e4.1o2|1e5.1o1	FALSE	TRUE	TRUE	10	6	0;1;0;1;1;1;1;0;1;1	14	-	64954775-64957079;64954727-64957079;64953914-64957079;64953012-64957079;64947037-64957079;64930479-64957079;64930475-64957079;64916356-64957079;64889697-64957079;64867399-64957079	64867389-64867399;64889687-64889697;64915824-64916356;64930390-64930479;64944769-64954775;64957079-64957258
75	ZBTB25	gene:ENSG00000089775	ENSG00000089775:t:64915824-64916356	-0.7156040834236537;0.6701485243196031;0.0027560782089361604;-3.0952336999260384e-05	0.9999984450246234;0.9999984991610621;0.002219892291169342;0.00021154584450334084	9.261476929811607e-07;8.837696318080671e-07;0.9661600947620307;0.9941104504759017	0.972;0.009;0.009;0.009	0.266;0.688;0.046;0.009	t|1e1.1o10|1e2.3o17|1e3.1o1|1e4.1o1	FALSE	FALSE	TRUE	4	5	0;0;1;1	14	-	64916356-64957079;64916356-64953832;64916356-64930390;64916356-64920393	64915824-64916356;64920393-nan;64930390-64930479;64944769-64954775;64957079-64957258
76	TCEAL1	gene:ENSG00000172465	ENSG00000172465:t:102884422-102884735	-0.6498097129750656;0.5007017354869111;-0.00021483878775930266;0.07387006323224156	0.999991632904822;0.9986569997761606;9.059347183561339e-05;0.2903355257037052	4.7736919945862155e-06;0.0008848853311669276;0.9967508541438774;0.3890533653599298	0.905;0.078;0.009;0.009	0.271;0.568;0.005;0.156	t|1e1.1o2|1e2.1o4|1e2.3o4|1e2.4o4	TRUE	FALSE	TRUE	4	3	0;0;1;1	X	+	102883721-102884422;102883953-102884422;102883980-102884422;102884224-102884422	102883632-102883721;102883902-102884224;102884422-102884735
77	ZFYVE20	gene:ENSG00000131381	ENSG00000131381:s:15137178-15137795	-0.0002445529661787318;-0.5461118575607556;-0.0002445529661787318;0.5824681290526131;-0.0002445529661787318;-0.0002445529661787318	0.00023137873535997408;0.9998900119828789;0.00023137873535997408;0.999808452763877;0.00023137873535997408;0.00023137873535997408	0.9954867995029685;3.4386111263828845e-05;0.9954867995029685;0.0001059781301059977;0.9954867995029685;0.9954867995029685	0.009;0.565;0.009;0.398;0.009;0.009	0.005;0.005;0.005;0.975;0.005;0.005	s|2e1.1o1|2e2.1o1|3e3.1o4|2e3.1o4|2e4.1o1|2e5.1o5	TRUE	FALSE	TRUE	6	6	1;1;1;0;1;1	3	-	15136013-15137480;15133000-15137480;15132046-15137481;15132046-15137480;15131847-15137480;15127468-15137480	15127368-15127468;15131642-15131847;15131906-15132046;15132846-15133000;15135789-15136013;15137178-15137795
78	BCL2L11	gene:ENSG00000153094	ENSG00000153094:s:111881627-111881716	7.695191840197757e-05;-0.33689746147151095;7.695191840197757e-05;7.695191840197757e-05;7.695191840197757e-05;7.695191840197757e-05;0.3315441041072062;7.695191840197757e-05;7.695191840197757e-05	2.925514968271441e-05;0.9973877097472853;2.925514968271441e-05;2.925514968271441e-05;2.925514968271441e-05;2.925514968271441e-05;0.9749656053041441;2.925514968271441e-05;2.925514968271441e-05	0.9988596844522939;0.0009649190362476245;0.9988596844522939;0.9988596844522939;0.9988596844522939;0.9988596844522939;0.01631407354728591;0.9988596844522939;0.9988596844522939	0.002;0.354;0.002;0.002;0.002;0.002;0.634;0.002;0.002	0.004;0.004;0.004;0.004;0.004;0.004;0.968;0.004;0.004	s|2e1.1o1|2e2.1o3|2e2.3o3|2e3.1o1|2e4.1o1|2e5.1o3|2e6.1o7|2e7.1o2|2e8.1o10	FALSE	TRUE	TRUE	9	9	1;0;1;1;0;1;0;1;1	2	+	111881716-111885865;111881716-111886204;111881716-111886207;111881716-111887709;111881716-111899890;111881716-111902065;111881716-111907621;111881716-111911357;111881716-111921710	111881627-111881716;111885865-111885957;111886204-111886423;111887709-nan;111899890-111899968;111902065-111902097;111907621-111907724;111911357-111911481;111921710-111926024
79	ZNF79	gene:ENSG00000196152	ENSG00000196152:t:130191092-130191199	-0.0001070431518921951;0.488397747163621;-0.0001070431518921951;-0.7212631110979948;0.1416083143914861;-0.0001070431518921951;-0.0001070431518921951	0.00017622250776441626;0.9701738830637897;0.00017622250776441626;0.9999329008119581;0.5758059842281116;0.00017622250776441626;0.00017622250776441626	0.9960582271179608;0.02305233653466459;0.9960582271179608;4.633649158958253e-05;0.23962344225834925;0.9960582271179608;0.9960582271179608	0.007;0.107;0.007;0.857;0.007;0.007;0.007	0.005;0.590;0.005;0.153;0.228;0.005;0.005	t|1e1.1o7|2e1.1o7|2e1.5o7|2e1.6o7|2e2.1o3|2e2.2o3|2e2.3o3	TRUE	TRUE	TRUE	7	3	1;0;1;1;0;1;1	9	+	130187082-130191092;130187082-130191111;130187152-130191111;130187189-130191111;130190939-130191111;130190961-130191111;130190997-130191111	130186661-130187189;130190831-130190997;130191092-130191199
80	ZNF79	gene:ENSG00000196152	ENSG00000196152:s:130186661-130187189	-0.012205470997238394;3.1768774484831188e-06;3.1768774484831188e-06;0.6838106816459003;3.1768774484831188e-06;-0.5885666267887047;3.1768774484831188e-06	0.020068130089599526;0.00020856345652387062;0.00020856345652387062;0.9992495588217452;0.00020856345652387062;0.9910129347511666;0.00020856345652387062	0.879024357145448;0.9956159609409692;0.9956159609409692;0.0005571879306487032;0.9956159609409692;0.00692555829648156;0.9956159609409692	0.097;0.006;0.006;0.097;0.006;0.779;0.006	0.007;0.007;0.007;0.769;0.007;0.207;0.007	s|1e1.1o2|3e1.1o2|1e2.1o7|1e2.2o7|2e2.2o7|3e2.2o7|1e3.1o4	TRUE	TRUE	TRUE	7	4	0;1;1;0;1;1;1	9	+	130187082-130190831;130187189-130190831;130187082-130191092;130187082-130191111;130187152-130191111;130187189-130191111;130187082-130197369	130186661-130187189;130190831-130190997;130191092-130191199;130197369-130197495
81	IVD	gene:ENSG00000128928	ENSG00000128928:s:40708459-40708561	-9.66472550358317e-07;-0.2777431387227005;0.009449729636700455;5.9147719455975327e-05;-0.0043119491006170085;-0.0006037803401280934;-9.66472550358317e-07;-9.66472550358317e-07;-9.66472550358317e-07;0.28171195324592585;-9.66472550358317e-07	2.6409761007671094e-08;0.9503049896216392;0.00624920020127354;7.437007786039768e-07;0.0015277197765715422;2.4181837249211537e-05;2.6409761007671094e-08;2.6409761007671094e-08;2.6409761007671094e-08;0.9878827189585395;2.6409761007671094e-08	0.9999712283544092;0.02735226071554875;0.8797826164997057;0.9993559212426723;0.9197435673088084;0.993802502554039;0.9999712283544092;0.9999712283544092;0.9999712283544092;0.004016857983526949;0.9999712283544092	0.001;0.817;0.046;0.001;0.057;0.023;0.001;0.001;0.001;0.047;0.001	0.001;0.533;0.081;0.011;0.041;0.001;0.001;0.001;0.001;0.329;0.001	s|1e1.1o1|1e2.1o3|1e3.1o4|1e4.1o2|1e5.1o2|1e6.1o5|1e6.3o5|1e6.4o5|1e7.1o3|1e8.1o10|1e8.9o10	FALSE	TRUE	TRUE	11	9	1;0;0;1;0;1;1;1;1;1;1	15	+	40708561-40709159;40708561-40710329;40708561-40711379;40708561-40715680;40708561-40716334;40708561-40719189;40708561-40719193;40708561-40719328;40708561-40726053;40708561-40727616;40708561-40727621	40708459-40708561;40709159-nan;40710329-40710966;40711379-40713512;40715680-40715803;40716334-40716672;40719189-40719501;40726053-40726113;40727616-40728146
82	C1orf159	gene:ENSG00000131591	ENSG00000131591:s:1019733-1019763	-0.06296383492504529;-2.1335028999443856e-05;-0.0036860462055074298;-2.1335028999443856e-05;-2.1335028999443856e-05;-2.1335028999443856e-05;0.5440805668378331;-0.31378006372544676	0.24572621818169893;4.268178047945573e-06;0.0013287464026179648;4.268178047945573e-06;4.268178047945573e-06;4.268178047945573e-06;0.9999210480874626;0.9860735387215285	0.6006868585618838;0.9994959706859076;0.9622011894837366;0.9994959706859076;0.9994959706859076;0.9994959706859076;4.126791961913543e-05;0.006059995359784076	0.343;0.003;0.045;0.003;0.003;0.003;0.255;0.343	0.167;0.002;0.002;0.002;0.002;0.002;0.789;0.036	s|1e1.4o5|1e1.3o5|1e1.2o5|1e1.1o5|1e2.2o3|1e3.1o1|1e4.1o5|i	FALSE	TRUE	TRUE	8	5	1;1;1;0;1;1;0;0	1	-	1019466-1019733;1019451-1019733;1019396-1019733;1019391-1019733;1018821-1019733;1018405-1019733;1018367-1019733;1019732-1019733	1017198-1018367;1018389-1018405;1018674-1018821;1018822-1019466;1019467-1019732;1019733-1019763	1019467-1019732
83	CCNYL1	gene:ENSG00000163249	ENSG00000163249:s:208591566-208591600	0.6185288529140464;-0.504170057236697;-0.017311687716342047	0.999993380573634;0.9998437012089048;0.03548380795699274	2.5569019892681634e-06;4.3132615806684704e-05;0.8391868789326065	0.367;0.517;0.117	0.984;0.008;0.008	s|1e1.1o1|1e2.1o4|1e3.1o5	FALSE	FALSE	TRUE	3	4	0;0;1	2	+	208591600-208598671;208591600-208602135;208591600-208606947	208591566-208591600;208598671-208598771;208602135-208602170;208606947-208607066
84	LIPT1	gene:ENSG00000144182	ENSG00000144182:s:99771418-99771514	0.0015275742522535332;0.34082837968208074;2.33905081810853e-05;2.33905081810853e-05;-0.3666303039847085;2.33905081810853e-05;2.33905081810853e-05	0.001562005007907169;0.9224269721815318;5.333355094282122e-06;5.333355094282122e-06;0.9597853072652708;5.333355094282122e-06;5.333355094282122e-06	0.9493121644706448;0.055632528298015044;0.9994292774796846;0.9994292774796846;0.027650701248662646;0.9994292774796846;0.9994292774796846	0.035;0.453;0.002;0.002;0.502;0.002;0.002	0.046;0.810;0.003;0.003;0.131;0.003;0.003	s|1e1.1o5|1e2.1o8|1e2.7o8|1e3.1o3|1e4.1o15|1e4.12o15|1e4.14o15	FALSE	TRUE	TRUE	7	5	0;0;1;1;0;1;1	2	+	99771514-99771945;99771514-99772764;99771514-99772788;99771514-99774760;99771514-99778420;99771514-99778423;99771514-99778648	99771418-99771514;99771945-99772007;99772764-99772889;99774760-99775052;99778420-99779620
85	CENPT	gene:ENSG00000102901	ENSG00000102901:t:67869075-67869241	-7.307520476358893e-05;-7.307520476358893e-05;-7.307520476358893e-05;0.03715066064389414;-7.307520476358893e-05;-7.307520476358893e-05;0.037911273358888414;-7.307520476358893e-05;-0.7615393922052152;0.473379465921537	9.52284755837715e-05;9.52284755837715e-05;9.52284755837715e-05;0.10299367998978025;9.52284755837715e-05;9.52284755837715e-05;0.10600794477083948;9.52284755837715e-05;0.9999984898735086;0.9995937734259716	0.9976276388552914;0.9976276388552914;0.9976276388552914;0.6722323732233914;0.9976276388552914;0.9976276388552914;0.6665107509742564;0.9976276388552914;9.614576985672585e-07;0.00025710184019411684	0.005;0.005;0.005;0.005;0.005;0.005;0.005;0.005;0.959;0.005	0.003;0.003;0.003;0.141;0.003;0.003;0.141;0.003;0.210;0.486	t|2e1.1o3|1e1.1o3|2e2.7o8|2e2.4o8|1e2.4o8|2e2.1o8|1e2.1o8|2e3.1o2|2e4.1o2|1e4.1o2	TRUE	TRUE	TRUE	10	5	0;0;1;1;1;0;1;1;0;1	16	-	67869203-67881483;67869198-67881483;67869203-67876934;67869203-67876902;67869198-67876902;67869203-67876861;67869198-67876861;67869203-67874552;67869203-67869441;67869198-67869441	67869075-67869241;67869441-67869561;67874552-nan;67876861-67877045;67881483-67881599
86	NUDT2	gene:ENSG00000164978	ENSG00000164978:s:34329504-34329597	4.856775153827939e-05;4.856775153827939e-05;0.0562792005112242;0.35895587059223916;-0.523946703656134;4.856775153827939e-05;-0.0005230356577309609;4.856775153827939e-05;4.856775153827939e-05;4.856775153827939e-05	1.5685266336928518e-05;1.5685266336928518e-05;0.1881597377054079;0.997897645264906;0.9999596053251708;1.5685266336928518e-05;8.618207819329984e-05;1.5685266336928518e-05;1.5685266336928518e-05;1.5685266336928518e-05	0.9991954332532809;0.9991954332532809;0.5418693228482988;0.000305361929399704;1.5791524974329008e-05;0.9991954332532809;0.9933570853640511;0.9991954332532809;0.9991954332532809;0.9991954332532809	0.002;0.002;0.002;0.002;0.967;0.002;0.019;0.002;0.002;0.002	0.003;0.003;0.155;0.376;0.453;0.003;0.003;0.003;0.003;0.003	s|1e1.1o1|1e2.1o5|1e2.2o5|1e2.4o5|1e3.1o8|1e3.7o8|1e4.1o5|1e5.1o3|1e6.1o2|1e7.1o1	FALSE	TRUE	TRUE	10	8	1;1;0;0;0;1;1;1;1;1	9	+	34329597-34330814;34329597-34336216;34329597-34336227;34329597-34336298;34329597-34338711;34329597-34338712;34329597-34339022;34329597-34343122;34329597-34416835;34329597-34437287	34329504-34329597;34330814-34330970;34336216-34336682;34338711-34338845;34339022-34339164;34343122-34343709;34416835-34416845;34437287-34437297
87	HIATL2	gene:ENSG00000196312	ENSG00000196312:s:99711837-99711964	0.0016474673997976693;0.01024580804548788;-0.001941713373942578;-1.1318256327433232e-06;0.0180370880610548;-1.1318256327433232e-06;-1.1318256327433232e-06;-1.1318256327433232e-06;-0.040657698801062105;-1.1318256327433232e-06;-1.1318256327433232e-06;-0.24199121516916794;-1.1318256327433232e-06;-1.1318256327433232e-06;0.0818942572263142;-0.001941713373942578;0.00959687592930727	0.000254007025278124;0.02903953380922597;0.00032586430147614004;5.187236647344016e-07;0.015813949872660063;5.187236647344016e-07;5.187236647344016e-07;5.187236647344016e-07;0.08932112871454852;5.187236647344016e-07;5.187236647344016e-07;0.9809496671873237;5.187236647344016e-07;5.187236647344016e-07;0.3096478580134931;0.00032586430147614004;0.004771696130194643	0.9830374524861073;0.846011902235519;0.9800572936680961;0.9998815342075495;0.8181430709533749;0.9998815342075495;0.9998815342075495;0.9998815342075495;0.6067573060161179;0.9998815342075495;0.9998815342075495;0.0022281273279204372;0.9998815342075495;0.9998815342075495;0.5535559708397599;0.9800572936680961;0.9023667977792386	0.001;0.152;0.035;0.001;0.001;0.001;0.001;0.001;0.119;0.001;0.001;0.263;0.001;0.001;0.388;0.035;0.001	0.033;0.211;0.001;0.001;0.083;0.001;0.001;0.001;0.017;0.001;0.001;0.001;0.001;0.001;0.586;0.001;0.066	s|1e1.1o1|1e2.1o1|1e3.1o1|1e4.5o5|1e4.4o5|1e4.3o5|1e4.2o5|1e4.1o5|1e5.2o2|1e5.1o2|1e6.1o1|1e7.1o2|1e8.1o1|1e9.1o1|1e10.1o1|1e11.1o1|1e12.1o1	FALSE	TRUE	TRUE	17	13	0;1;1;1;1;1;1;0;1;1;1;1;1;1;1;1;1	9	-	99711202-99711837;99710370-99711837;99709540-99711837;99708687-99711837;99708638-99711837;99708634-99711837;99708518-99711837;99708503-99711837;99706367-99711837;99706364-99711837;99706014-99711837;99705436-99711837;99705423-99711837;99705372-99711837;99705034-99711837;99696197-99711837;99681108-99711837	nan-99709540;nan-99710370;99681098-99681108;99696187-99696197;99705024-99705034;99705362-99705372;99705413-99705423;99705426-99705436;99706004-99706014;99706354-99706367;99708327-99708687;99711193-99711202;99711837-99711964
88	MCM9	gene:ENSG00000111877	ENSG00000111877:t:119177534-119177708	0.5996255581241627;-0.572362692695722;-0.0006574066623477216;-0.0006574066623477216	0.996066038679588;0.9783365074188832;0.0012184800415138294;0.0012184800415138294	0.0031367158443552723;0.01749996200904791;0.9870940870267314;0.9870940870267314	0.023;0.932;0.023;0.023	0.616;0.361;0.010;0.010	t|1e1.2o10|1e2.1o2|1e3.1o2|1e4.1o1	FALSE	FALSE	TRUE	4	5	0;1;1;1	6	-	119177708-119232815;119177708-119215191;119177708-119214680;119177708-119179252	119177534-119177708;119179252-nan;119214680-nan;119215191-nan;119231762-119232934
89	HERC2P9	gene:ENSG00000206149	ENSG00000206149:t:28900942-28901317	0.5448877919902555;-0.5448877919902542	0.9953961017504209;0.9953961017504209	0.0033140106000905433;0.003314010600090622	0.220;0.780	0.750;0.250	t|1e1.1o4|1e2.1o1	FALSE	FALSE	TRUE	2	3	1;0	15	+	28900566-28900942;28900837-28900942	28900419-28900566;28900625-28900837;28900942-28901317
90	TC2N	gene:ENSG00000165929	ENSG00000165929:s:92302527-92302870	-2.5222427455692333e-05;-2.5222427455692333e-05;-0.06751825795839868;-2.5222427455692333e-05;-2.5222427455692333e-05;-2.5222427455692333e-05;-2.5222427455692333e-05;-0.14676336449313582;-2.5222427455692333e-05;0.3810881873928227;-2.5222427455692333e-05;-2.5222427455692333e-05;6.763107980160405e-05;-2.5222427455692333e-05;-2.5222427455692333e-05	3.915927640998641e-06;3.915927640998641e-06;0.23455024412173872;3.915927640998641e-06;3.915927640998641e-06;3.915927640998641e-06;3.915927640998641e-06;0.5116577589466569;3.915927640998641e-06;0.9677910921452804;3.915927640998641e-06;3.915927640998641e-06;5.7603346148089445e-06;3.915927640998641e-06;3.915927640998641e-06	0.9997190190812562;0.9997190190812562;0.43744753493096267;0.9997190190812562;0.9997190190812562;0.9997190190812562;0.9997190190812562;0.38096208785810515;0.9997190190812562;0.02153243688972789;0.9997190190812562;0.9997190190812562;0.9987691477938064;0.9997190190812562;0.9997190190812562	0.002;0.002;0.154;0.002;0.002;0.002;0.002;0.475;0.002;0.355;0.002;0.002;0.002;0.002;0.002	0.001;0.001;0.001;0.001;0.001;0.001;0.001;0.235;0.001;0.735;0.001;0.001;0.012;0.001;0.001	s|1e2.1o1|3e3.1o2|1e3.1o2|3e4.1o3|1e4.1o3|1e5.1o2|1e6.1o2|3e7.2o25|2e7.2o25|1e7.2o25|3e7.1o25|3e8.1o4|3e9.1o10|2e9.1o10|1e9.1o10	TRUE	TRUE	TRUE	15	9	1;1;1;1;1;1;1;0;1;0;1;1;1;1;1	14	-	92301990-92302527;92299046-92302715;92299046-92302527;92292660-92302715;92292660-92302527;92289375-92302527;92283927-92302527;92280169-92302715;92280169-92302605;92280169-92302527;92280103-92302715;92278800-92302715;92268765-92302715;92268765-92302605;92268765-92302527	92268598-92268781;92278656-92278889;92280047-92280169;92283866-92283927;92289260-92289861;92292539-92292660;92298980-92299046;92301796-92301990;92302527-92302870

## Sheet: 8hr CD28 Donor 3
8hr CD28 AS Events - Donor 3
	X.Gene.Name	Gene.ID	LSV.ID	E.dPSI..per.LSV.junction	P..dPSI...0.10..per.LSV.junction	P..dPSI...0.05..per.LSV.junction	ND535.8hr.Unstim.E.PSI.	ND535.8hr.CD28.E.PSI.	LSV.Type	A5SS	A3SS	ES	Num..Junctions	Num..Exons	De.Novo.Junctions	chr	strand	Junctions.coords	Exons.coords	IR.coords
1	CSGALNACT1	gene:ENSG00000147408	ENSG00000147408:t:19459282-19459376	-0.27395572768121706;4.560080333701102e-06;0.22380299483813484;0.0007506868038033044;-0.0034126897084751084;4.560080333701102e-06;4.560080333701102e-06;4.560080333701102e-06;0.010645769771178999;4.560080333701102e-06;4.560080333701102e-06;-0.00044204464902933787;4.560080333701102e-06;4.560080333701102e-06;4.560080333701102e-06;4.560080333701102e-06;4.560080333701102e-06;4.560080333701102e-06;4.56…	0.9971518045050503;2.7014846382057085e-07;0.7795841955264493;0.011966020097016269;0.00032230977807749735;2.7014846382057085e-07;2.7014846382057085e-07;2.7014846382057085e-07;0.006573500885247348;2.7014846382057085e-07;2.7014846382057085e-07;1.2395381109939897e-05;2.7014846382057085e-07;2.7014846382057085e-07;2.7014846382057085e-07;2.7014846382057085e-07;2.7014846382057085e-07;2.7014846382057085e-…	0.0006636808869951993;0.9999389560501493;0.15578248166793995;0.88249641918927;0.9649932979113518;0.9999389560501493;0.9999389560501493;0.9999389560501493;0.8921352918806046;0.9999389560501493;0.9999389560501493;0.9953687812462197;0.9999389560501493;0.9999389560501493;0.9999389560501493;0.9999389560501493;0.9999389560501493;0.9999389560501493;0.9999389560501493	0.293;0.001;0.449;0.178;0.043;0.001;0.001;0.001;0.001;0.001;0.001;0.022;0.001;0.001;0.001;0.001;0.001;0.001;0.001	0.018;0.001;0.723;0.184;0.001;0.001;0.001;0.001;0.070;0.001;0.001;0.001;0.001;0.001;0.001;0.001;0.001;0.001;0.001	t|1e1.1o9|1e2.1o1|1e3.3o12|1e3.1o12|1e4.1o1|1e5.1o1|1e6.1o1|1e7.1o3|1e8.1o1|1e9.1o1|1e10.1o1|1e11.1o2|1e12.1o1|1e13.1o1|1e14.1o1|1e15.1o1|1e16.1o1|1e17.2o3|1e17.1o3	TRUE	FALSE	TRUE	19	18	0;1;0;1;1;1;1;1;1;1;1;1;0;0;1;1;1;0;0	8	-	19459376-19615361;19459376-19614961;19459376-19614697;19459376-19614450;19459376-19610567;19459376-19609004;19459376-19598949;19459376-19589967;19459376-19572396;19459376-19569279;19459376-19562272;19459376-19540439;19459376-19540207;19459376-19539984;19459376-19523400;19459376-19487234;19459376-19482653;19459376-19459913;19459376-19459503	19459282-19459376;19459503-19460006;19482653-nan;19487234-nan;19523400-nan;19539984-19540094;19540207-19540272;19540439-19540592;19562272-nan;19569279-nan;19572396-19572535;19589967-19590077;19598949-19599046;19609004-nan;19610567-19610737;19614450-19614816;19614961-19614971;19615361-19615540
2	DCLRE1C	gene:ENSG00000152457	ENSG00000152457:t:14987104-14987188	-0.013755327891530916;-0.45899752444006214;0.00019328567370127482;0.5840331775688182;-0.006785210914225674	0.011153053474452224;0.9776589189651302;9.271143199035721e-05;0.9986304918681969;0.0032891514346712583	0.8566521549314885;0.016960774603992146;0.9972481043680008;0.0009944965437693096;0.9263541401964528	0.076;0.624;0.004;0.237;0.058	0.008;0.162;0.008;0.815;0.008	t|1e1.1o2|1e2.1o5|1e3.4o5|1e3.1o5|1e4.1o1	TRUE	FALSE	TRUE	5	5	0;0;1;0;0	10	-	14987188-14995901;14987188-14991035;14987188-14989553;14987188-14989524;14987188-14987434	14987104-14987188;14987434-14987564;14989524-14989634;14991035-14991086;14995901-14996431
3	IL18BP	gene:ENSG00000137496	ENSG00000137496:s:71709587-71710065	0.001433456536930705;0.45549244464389527;-0.0012573419711093788;-0.06757741760558238;7.396158865594422e-06;7.396158865594422e-06;7.396158865594422e-06;7.396158865594422e-06;0.016175476340196115;7.396158865594422e-06;-0.3821812233631712	0.0005346743316023911;0.9919747042503935;0.0003686870222533842;0.2378268206955267;1.3947031124659047e-05;1.3947031124659047e-05;1.3947031124659047e-05;1.3947031124659047e-05;0.06792272144672155;1.3947031124659047e-05;0.9996973266466972	0.9846646546087677;0.005317723692651511;0.9862760584820303;0.43640479357525996;0.999159248924366;0.999159248924366;0.999159248924366;0.999159248924366;0.8037882414666527;0.999159248924366;6.09213906290762e-05	0.002;0.102;0.027;0.152;0.002;0.002;0.002;0.002;0.303;0.002;0.400	0.030;0.547;0.002;0.002;0.002;0.002;0.002;0.002;0.394;0.002;0.002	s|1e1.3o5|1e1.4o5|1e1.5o5|1e2.1o8|1e2.4o8|1e2.5o8|1e3.1o12|1e3.4o12|1e3.7o12|1e3.12o12|i	FALSE	TRUE	TRUE	11	4	1;0;0;1;1;1;1;1;0;1;0	11	+	71710065-71710251;71710065-71710274;71710065-71710305;71710065-71710509;71710065-71710622;71710065-71710663;71710065-71710846;71710065-71710859;71710065-71710973;71710065-71710978;71710065-71710066	71709587-71710065;71710066-71710108;71710109-71710416;71710509-71710708;71710846-71711058	71710066-71710108
4	TLK2	gene:ENSG00000146872	ENSG00000146872:s:60600495-60600538	-2.8008711758079568e-05;0.452192601409065;-0.45115669594081226;-2.8008711758079568e-05	5.276590218428893e-06;0.9999475667578304;0.9999674096119481;5.276590218428893e-06	0.9991804105236026;1.43872341838532e-05;8.2726924136578e-06;0.9991804105236026	0.005;0.509;0.483;0.005	0.004;0.957;0.035;0.004	s|1e1.1o2|1e1.2o2|1e2.1o5|1e3.1o8	FALSE	TRUE	TRUE	4	4	1;0;0;1	17	+	60600538-60601206;60600538-60601597;60600538-60613531;60600538-60629663	60600495-60600538;60601206-60601692;60613531-60614061;60629663-60629758
5	RABL2A	gene:ENSG00000144134	ENSG00000144134:s:114384806-114385087	-0.002608643858327471;8.729315574352002e-06;0.06249478500684319;8.729315574352002e-06;8.729315574352002e-06;0.36635224293268687;-0.002608643858327471;8.729315574352002e-06;8.729315574352002e-06;-0.4653517309188421;8.729315574352002e-06;0.0004838598644915159;8.729315574352002e-06	0.00017646541629940754;5.179719737637405e-07;0.2508137760809439;5.179719737637405e-07;5.179719737637405e-07;0.9993108885052209;0.00017646541629940754;5.179719737637405e-07;5.179719737637405e-07;0.9998647257501888;5.179719737637405e-07;5.07583221743291e-05;5.179719737637405e-07	0.9731268482330098;0.9998968174353756;0.5709042224436669;0.9998968174353756;0.9998968174353756;0.00017053312533033818;0.9731268482330098;0.9998968174353756;0.9998968174353756;5.3314210097576975e-05;0.9998968174353756;0.9950385042924222;0.9998968174353756	0.040;0.001;0.144;0.001;0.001;0.069;0.040;0.001;0.001;0.703;0.001;0.001;0.001	0.001;0.001;0.306;0.001;0.001;0.424;0.001;0.001;0.001;0.241;0.001;0.019;0.001	s|3e1.1o1|2e2.1o3|3e2.1o3|3e3.1o1|1e4.1o22|3e4.1o22|4e4.1o22|5e4.1o22|2e4.13o22|3e4.13o22|5e4.13o22|3e4.20o22|3e4.22o22	TRUE	TRUE	TRUE	13	5	1;1;0;1;1;0;1;1;1;0;1;1;1	2	+	114384977-114385192;114384973-114385433;114384977-114385433;114384977-114385629;114384948-114386127;114384977-114386127;114385045-114386127;114385087-114386127;114384973-114386131;114384977-114386131;114385087-114386131;114384977-114386174;114384977-114386178	114384806-114385087;114385192-114385433;114385433-114385587;114385629-114385709;114386127-114386290
6	BTBD7	gene:ENSG00000011114	ENSG00000011114:s:93799166-93799438	-8.145919990544048e-05;-8.145919990544048e-05;0.5712012849039014;-0.5640280223627088;-8.145919990544048e-05;-8.145919990544048e-05;-8.145919990544048e-05	0.00018959075964196777;0.00018959075964196777;0.9909490045093972;0.9887017885947074;0.00018959075964196777;0.00018959075964196777;0.00018959075964196777	0.9958523702584873;0.9958523702584873;0.006907457900265838;0.008656218992147302;0.9958523702584873;0.9958523702584873;0.9958523702584873	0.007;0.007;0.157;0.807;0.007;0.007;0.007	0.006;0.006;0.714;0.246;0.006;0.006;0.006	s|1e1.1o1|1e2.1o1|1e3.1o1|1e4.1o6|1e5.1o2|1e6.1o3|1e7.1o4	FALSE	FALSE	TRUE	7	8	1;1;1;0;1;0;1	14	-	93797737-93799166;93793146-93799166;93791211-93799166;93762503-93799166;93761283-93799166;93730339-93799166;93728023-93799166	nan-93793146;nan-93797737;93727948-93728023;93729867-93730339;93761199-93761283;93762316-93762504;93790906-93791211;93799166-93799438
7	NDRG2	gene:ENSG00000165795	ENSG00000165795:t:21491400-21491899	5.314237351718134e-05;5.314237351718134e-05;5.314237351718134e-05;-0.3147771155911095;5.314237351718134e-05;5.314237351718134e-05;5.314237351718134e-05;0.28390867490383015;5.314237351718134e-05;5.314237351718134e-05;5.314237351718134e-05	1.3586033838347726e-05;1.3586033838347726e-05;1.3586033838347726e-05;0.9613756791497943;1.3586033838347726e-05;1.3586033838347726e-05;1.3586033838347726e-05;0.9050396214883457;1.3586033838347726e-05;1.3586033838347726e-05;1.3586033838347726e-05	0.9993837698763482;0.9993837698763482;0.9993837698763482;0.025409269963891368;0.9993837698763482;0.9993837698763482;0.9993837698763482;0.06621231234122599;0.9993837698763482;0.9993837698763482;0.9993837698763482	0.001;0.001;0.001;0.382;0.001;0.001;0.001;0.612;0.001;0.001;0.001	0.003;0.003;0.003;0.063;0.003;0.003;0.003;0.912;0.003;0.003;0.003	t|1e1.1o1|1e2.1o1|1e3.1o3|1e4.1o3|1e5.4o5|1e5.3o5|1e5.1o5|1e6.3o3|1e6.2o3|1e6.1o3|1e7.1o1	TRUE	FALSE	TRUE	11	8	0;0;0;0;0;0;0;0;0;0;0	14	-	21491480-21538987;21491480-21515025;21491480-21493836;21491480-21493188;21491480-21493008;21491480-21492997;21491480-21492985;21491480-21492189;21491480-21492145;21491480-21492135;21491480-21492048	21491400-21491899;21492048-21492113;21492135-21492298;21492985-21493185;21493188-21493220;21493836-21494007;21515025-21515089;21538987-21539031
8	PYROXD1	gene:ENSG00000121350	ENSG00000121350:s:21602497-21602638	-0.5105147095377627;0.5148904046791705;0.00014718142229426753	0.9867366575202896;0.987483344461342;0.00031422601147257725	0.009885521178391476;0.009331933047582432;0.9917114600098116	0.682;0.301;0.011	0.181;0.806;0.014	s|1e1.1o2|1e2.1o4|2e2.1o4	TRUE	FALSE	TRUE	3	3	0;0;1	12	+	21602625-21605015;21602625-21608066;21602638-21608066	21602497-21602638;21605015-21605088;21608066-21608226
9	DMAP1	gene:ENSG00000178028	ENSG00000178028:t:44679335-44679530	-0.18884566256054025;0.27380671223135244;0.0015126945757132151;6.770700166074821e-07;-0.036522215601806844;6.770700166074821e-07;6.770700166074821e-07;6.770700166074821e-07	0.9774429077455568;0.9971994455575189;9.653729042737518e-05;3.3132724370170814e-09;0.04239015728358507;3.3132724370170814e-09;3.3132724370170814e-09;3.3132724370170814e-09	0.000258097581858574;0.0004990280382025738;0.9781915800038407;0.9999923438609962;0.6296593354762805;0.9999923438609962;0.9999923438609962;0.9999923438609962	0.211;0.664;0.025;0.001;0.096;0.001;0.001;0.001	0.001;0.933;0.037;0.001;0.028;0.001;0.001;0.001	t|1e1.1o8|2e1.1o8|3e1.1o8|1e1.4o8|2e1.4o8|3e1.4o8|2e1.7o8|3e1.8o8	TRUE	TRUE	FALSE	8	2	0;0;0;1;1;1;1;0	1	+	44679199-44679335;44679199-44679381;44679199-44679421;44679221-44679335;44679221-44679381;44679221-44679421;44679254-44679381;44679334-44679421	44679127-44679334;44679335-44679530
10	C17orf80	gene:ENSG00000141219	ENSG00000141219:t:71238937-71239142	0.0001827485647394702;0.5135092843697882;0.0001827485647394702;-0.5189639931626848	0.00012595667348826398;0.9958590790350553;0.00012595667348826398;0.9952521211529255	0.9959467129613643;0.0027893955153328064;0.9959467129613643;0.0033026428936749896	0.006;0.122;0.006;0.863	0.009;0.627;0.009;0.355	t|2e1.1o6|2e1.4o6|1e2.1o2|2e2.1o2	TRUE	TRUE	TRUE	4	3	1;0;1;0	17	+	71231661-71239035;71233134-71239035;71238490-71238937;71238490-71239035	71231615-71233134;71238383-71238490;71238937-71239142
11	CECR1	gene:ENSG00000093072	ENSG00000093072:t:17690246-17690779	2.022905316516142e-05;2.022905316516142e-05;2.022905316516142e-05;0.002733642390809892;-0.02148928721964058;-0.06021649564806288;2.022905316516142e-05;-0.12573074153655941;2.022905316516142e-05;0.4303523557094314;-0.0011177387547447791	1.5422129108441602e-05;1.5422129108441602e-05;1.5422129108441602e-05;0.03606293153193775;0.030305253021790282;0.19530619189149012;1.5422129108441602e-05;0.576147146970248;1.5422129108441602e-05;0.9853294473808071;0.00029782432341910836	0.9991303990617857;0.9991303990617857;0.9991303990617857;0.8411325669668774;0.7874623388076298;0.4757601500655536;0.9991303990617857;0.17535627963876133;0.9991303990617857;0.00981793031937196;0.9875307926048539	0.002;0.002;0.002;0.383;0.097;0.145;0.002;0.193;0.002;0.145;0.026	0.003;0.003;0.003;0.409;0.003;0.003;0.003;0.003;0.003;0.565;0.003	t|4e1.1o3|2e1.1o3|1e1.1o3|4e2.1o5|3e2.1o5|1e2.1o5|4e3.3o3|4e3.1o3|1e3.1o3|4e4.1o2|1e4.1o2	TRUE	TRUE	TRUE	11	5	0;0;0;0;0;1;1;1;1;1;1	22	-	17690613-17702617;17690575-17702617;17690488-17702617;17690613-17700246;17690580-17700246;17690488-17700246;17690613-17693395;17690613-17693148;17690488-17693148;17690613-17692893;17690488-17692893	17690246-17690779;17692893-nan;17693148-17693468;17700246-17700325;17702617-17702879
12	RP5-827C21.4	gene:ENSG00000231663	ENSG00000231663:t:234508553-234508956	-0.2321933720345733;-0.06856618514515586;0.44935447994516414;2.981104267481385e-05	0.7634356969749968;0.26050962219437224;0.9999581828115677;3.0295314337624694e-06	0.17172058873244644;0.6001723161754653;1.0678773967919814e-05;0.9994405168236967	0.481;0.466;0.054;0.003	0.214;0.291;0.487;0.004	t|2e1.3o3|2e1.1o3|1e1.1o3|2e2.1o1	TRUE	TRUE	TRUE	4	3	1;0;1;1	1	-	234508956-234509264;234508956-234509169;234508936-234509169;234508956-234509134	234508553-234508956;234509134-234509144;234509169-234509339
13	PIGV	gene:ENSG00000060642	ENSG00000060642:t:27117250-27117384	-0.02713451916360934;0.3555687519881827;-0.0020056349849051974;-0.0250356556155383;4.181953518195375e-05;-0.02421995144692373;4.181953518195375e-05	0.10524802207834794;0.9664029035543487;0.0359484073742246;0.08443385047507379;3.568956503770274e-05;0.040218084231820196;3.568956503770274e-05	0.7606123290668995;0.020929431556310097;0.8411166537173078;0.7570024554993062;0.9983036172192065;0.7628758667123332;0.9983036172192065	0.362;0.054;0.304;0.179;0.004;0.104;0.004	0.223;0.402;0.283;0.069;0.005;0.005;0.005	t|1e1.1o5|1e1.4o5|1e2.1o7|1e2.4o7|1e2.5o7|1e2.6o7|1e3.1o1	TRUE	FALSE	TRUE	7	4	0;1;0;0;1;0;0	1	+	27114297-27117250;27114480-27117250;27114759-27117250;27114885-27117250;27115166-27117250;27115310-27117250;27115521-27117250	27113963-27114480;27114486-27115310;27115419-27115521;27117250-27117384
14	TBC1D7	gene:ENSG00000145979	ENSG00000145979:t:13327019-13327195	1.0508412615071472e-05;-0.3999694384822227;0.025343023831055578;0.0021474790285398674;0.08011677314768854;1.0508412615071472e-05;0.010687157203825159;1.0508412615071472e-05;1.0508412615071472e-05;1.0508412615071472e-05;1.0508412615071472e-05	5.4361168846732686e-06;0.9982914675806384;0.09530756562294965;0.00895364440016736;0.32312504093498884;5.4361168846732686e-06;0.03489231691568837;5.4361168846732686e-06;5.4361168846732686e-06;5.4361168846732686e-06;5.4361168846732686e-06	0.9994978681356539;0.0008657645278391524;0.7676791133019405;0.8942188118585935;0.5091102467366085;0.9994978681356539;0.8395096767084103;0.9994978681356539;0.9994978681356539;0.9994978681356539;0.9994978681356539	0.002;0.442;0.237;0.082;0.082;0.002;0.142;0.002;0.002;0.002;0.002	0.002;0.050;0.363;0.097;0.264;0.002;0.216;0.002;0.002;0.002;0.002	t|1e1.1o1|3e2.1o3|1e2.1o3|3e3.4o5|1e3.4o5|3e3.1o5|1e3.1o5|3e4.1o2|1e4.1o2|3e5.1o2|1e5.1o2	TRUE	TRUE	TRUE	11	6	1;0;0;1;0;0;0;0;0;0;1	6	-	13327138-13338113;13327195-13328688;13327138-13328688;13327195-13328548;13327138-13328548;13327195-13328528;13327138-13328528;13327195-13328065;13327138-13328065;13327195-13327910;13327138-13327910	13327019-13327195;13327910-13328050;13328065-13328362;13328528-13328564;13328688-13328815;13338113-13338123
15	LMF1	gene:ENSG00000103227	ENSG00000103227:s:984190-984254	0.4376320832820536;9.978161521390399e-05;9.978161521390399e-05;-0.3421309813293826;-0.006663775019152813;9.978161521390399e-05	0.9730528822187532;0.000116122167978709;0.000116122167978709;0.8471011172913676;0.005480611537953375;0.000116122167978709	0.019188037628277203;0.9966452458120686;0.9966452458120686;0.11887103816396838;0.9286641863538584;0.9966452458120686	0.093;0.005;0.005;0.828;0.064;0.005	0.529;0.007;0.007;0.442;0.007;0.007	s|2e1.1o1|2e2.1o2|1e2.1o2|2e3.2o8|1e3.2o8|2e4.1o4	TRUE	FALSE	TRUE	6	5	1;1;1;0;0;1	16	-	984145-984244;981793-984244;981793-984190;961079-984244;961079-984190;943072-984244	943007-943072;960858-961079;981642-981793;983991-984145;984190-984254
16	RNF41	gene:ENSG00000181852	ENSG00000181852:t:56610213-56610397	9.791738976315478e-06;9.791738976315478e-06;-0.48174488802015974;9.791738976315478e-06;0.48506884417802826;9.791738976315478e-06	1.0163928660313268e-05;1.0163928660313268e-05;0.9976826726921767;1.0163928660313268e-05;0.9970011877901754;1.0163928660313268e-05	0.999037700446591;0.999037700446591;0.0014774699357472665;0.999037700446591;0.0019979519463097562;0.999037700446591	0.003;0.003;0.722;0.003;0.259;0.003	0.004;0.004;0.248;0.004;0.737;0.004	t|2e1.1o1|2e2.1o1|2e3.1o5|1e3.1o5|2e4.1o5|2e5.1o1	FALSE	TRUE	TRUE	6	6	1;1;0;1;0;0	12	-	56610397-56617988;56610397-56616193;56610397-56615687;56610395-56615687;56610397-56615544;56610397-56615375	56610213-56610397;56615375-56615485;56615544-56615627;56615687-56615717;56616193-56616203;56617988-56617998
17	THNSL2	gene:ENSG00000144115	ENSG00000144115:t:88485417-88486146	0.004982703561882549;0.008759329148980831;3.673502139233515e-05;0.44432337237554226;3.673502139233515e-05;-0.36830060371444073;-0.10598931804203086	0.0029175395979814485;0.03368371256297518;1.2430700515634623e-05;0.9906972271720308;1.2430700515634623e-05;0.9997538228284065;0.47296047596293544	0.9490633934101247;0.8435832800186501;0.999076004981054;0.0061823310090196966;0.999076004981054;5.667616243210105e-05;0.23144629672884898	0.003;0.173;0.003;0.257;0.003;0.387;0.166	0.055;0.234;0.004;0.702;0.004;0.004;0.004	t|1e1.1o3|1e2.1o7|2e2.1o7|1e3.1o5|2e3.1o5|1e4.2o3|2e4.2o3	FALSE	TRUE	TRUE	7	5	0;0;1;0;1;0;1	2	+	88478532-88485417;88482592-88485417;88482592-88485452;88484998-88485417;88484998-88485452;88485243-88485417;88485243-88485452	88478302-88478532;88482467-88482592;88484847-88484998;88485047-88485243;88485417-88486146
18	OFD1	gene:ENSG00000046651	ENSG00000046651:s:13769368-13769487	8.574340043751702e-07;0.347603302623611;8.574340043751702e-07;-0.33566673576634454;-0.0014466747218695852;0.0003016826238336483	8.410228375331398e-09;0.9973857445885179;8.410228375331398e-09;0.996244997026205;3.7420445298038546e-05;5.614434270137899e-06	0.9999795096898206;0.0008589357429012619;0.9999795096898206;0.0012459779824115502;0.9851647034976023;0.9969004063818571	0.001;0.489;0.001;0.473;0.035;0.001	0.002;0.816;0.002;0.154;0.002;0.021	s|1e1.1o3|2e1.1o3|2e2.1o5|2e2.2o5|2e3.1o5|2e4.1o4	TRUE	TRUE	TRUE	6	5	1;0;1;0;1;1	X	+	13769486-13770823;13769487-13770823;13769487-13771471;13769487-13771487;13769487-13773270;13769487-13774697	13769368-13769487;13770823-13771223;13771471-13771560;13773270-13773361;13774697-13774886
19	TPK1	gene:ENSG00000196511	ENSG00000196511:s:144380002-144380071	0.4967126327129823;0.01546419079017138;-0.5728115897009154;-0.0002047147833982227;-0.0002047147833982227	0.9973904168750621;0.015907148458038305;0.9995892390015644;0.00010076619021838422;0.00010076619021838422	0.0017817922185399363;0.8401391581197054;0.00026904765189872393;0.9969356244803866;0.9969356244803866	0.088;0.008;0.888;0.008;0.008	0.571;0.086;0.324;0.004;0.004	s|1e1.1o1|1e2.1o3|1e3.1o5|1e4.1o6|1e5.1o9	FALSE	FALSE	TRUE	5	6	0;0;0;1;1	7	-	144378957-144380002;144364939-144380002;144345972-144380002;144320354-144380002;144150756-144380002	144149034-144150756;144320259-144320354;144345900-144345972;144364819-144364939;144378900-144378957;144380002-144380071
20	NQO2	gene:ENSG00000124588	ENSG00000124588:t:3002284-3002520	0.0003134325955182942;0.0003134325955182942;0.5687316855967872;-0.5685364383945276	0.00023920643842897233;0.00023920643842897233;0.9998088986617828;0.9999710472125047	0.9946439840061818;0.9946439840061818;0.00012962378519623758;1.909894429918957e-05	0.006;0.006;0.401;0.585	0.012;0.012;0.964;0.012	t|1e1.1o6|1e2.1o2|1e3.1o8|1e4.1o4	FALSE	FALSE	TRUE	4	5	1;1;0;1	6	+	2994287-3002284;2999593-3002284;3000319-3002284;3001466-3002284	2994165-2994287;2999575-2999593;3000110-3000319;3001344-3001466;3002284-3002520
21	FAM221A	gene:ENSG00000188732	ENSG00000188732:t:23740405-23740487	0.01313097080738959;0.005486303157591317;-6.153118186229458e-05;0.03960166364221855;-0.35577328675519393;0.09457258057535514	0.019874271032477714;0.001190757487656999;1.0038084513235187e-05;0.06095891171289635;0.9939045326666305;0.4261664220665678	0.8378991288558673;0.942674315316126;0.9992457322869048;0.6059042541592005;0.003446195108146477;0.2213327471103334	0.051;0.004;0.004;0.004;0.933;0.004	0.106;0.052;0.002;0.103;0.588;0.153	t|1e1.1o8|2e1.1o8|1e2.1o3|1e3.1o2|1e4.1o2|2e4.1o2	FALSE	TRUE	TRUE	6	5	0;1;1;1;0;1	7	+	23731215-23740405;23731215-23740408;23731872-23740405;23734532-23740405;23737918-23740405;23737918-23740408	23731009-23731215;23731802-23731876;23734510-23734532;23737811-23737918;23740405-23740487
22	LLGL2	gene:ENSG00000073350	ENSG00000073350:s:73521807-73521906	0.13799658645046503;-2.4935132552445502e-05;0.2568408751435915;-2.4935132552445502e-05;-2.4935132552445502e-05;-0.510100321472628;-2.4935132552445502e-05;-2.4935132552445502e-05	0.5730860823500752;8.463394293327236e-05;0.9208158406791084;8.463394293327236e-05;8.463394293327236e-05;0.998772477861049;8.463394293327236e-05;8.463394293327236e-05	0.222957262118201;0.9974468937006715;0.03267143467138842;0.9974468937006715;0.9974468937006715;0.0008213329593893537;0.9974468937006715;0.9974468937006715	0.005;0.005;0.005;0.005;0.005;0.967;0.005;0.005	0.223;0.005;0.296;0.005;0.005;0.459;0.005;0.005	s|1e1.1o1|1e2.1o4|1e3.1o2|1e4.1o3|1e4.3o3|1e5.2o11|1e5.11o11|1e6.1o4	FALSE	TRUE	TRUE	8	7	1;0;0;1;1;0;1;1	17	+	73521906-73527931;73521906-73529723;73521906-73534612;73521906-73535871;73521906-73535874;73521906-73539478;73521906-73539486;73521906-73552127	73521807-73521906;73527931-73528110;73529723-73529786;73534612-73534717;73535871-73535967;73539342-73539582;73552127-73552224
23	ST3GAL3	gene:ENSG00000126091	ENSG00000126091:s:44303891-44303983	-0.013171960917193106;-0.4670277349114752;3.2093817295979584e-05;3.2093817295979584e-05;0.046622613074484225;0.2740431745972143;3.2093817295979584e-05;3.2093817295979584e-05;3.2093817295979584e-05	0.023776395272192864;0.9957135634841676;0.0002254427433868534;0.0002254427433868534;0.15025641742445278;0.6437813530368944;0.0002254427433868534;0.0002254427433868534;0.0002254427433868534	0.8717304180512899;0.0027307229617639095;0.9959984147880792;0.9959984147880792;0.6622421575740775;0.2952830403481525;0.9959984147880792;0.9959984147880792;0.9959984147880792	0.106;0.481;0.006;0.006;0.006;0.380;0.006;0.006;0.006	0.007;0.007;0.007;0.007;0.183;0.771;0.007;0.007;0.007	s|1e1.1o1|1e2.1o1|1e3.1o3|1e3.2o3|1e3.3o3|1e4.1o6|1e5.1o3|1e6.3o12|1e7.2o11	FALSE	TRUE	TRUE	9	8	1;1;1;1;1;0;1;1;0	1	+	44303983-44309741;44303983-44323807;44303983-44344699;44303983-44345003;44303983-44345007;44303983-44360055;44303983-44363907;44303983-44386076;44303983-44395804	44303891-44303983;44309741-44309801;44323807-44323980;44344699-44345179;44360055-44360149;44363907-44363970;44385604-44386222;44395691-44396831
24	RPS14	gene:ENSG00000164587	ENSG00000164587:s:149828832-149829259	-3.317010121794444e-05;-3.317010121794444e-05;-3.317010121794444e-05;-3.317010121794444e-05;-0.43477340388235985;0.4507474301129018;-3.317010121794444e-05;-3.317010121794444e-05;-3.317010121794444e-05;-3.317010121794444e-05;-3.317010121794444e-05;-3.317010121794444e-05;-3.317010121794444e-05	6.750051048527032e-06;6.750051048527032e-06;6.750051048527032e-06;6.750051048527032e-06;0.998164189770148;0.9983866218222794;6.750051048527032e-06;6.750051048527032e-06;6.750051048527032e-06;6.750051048527032e-06;6.750051048527032e-06;6.750051048527032e-06;6.750051048527032e-06	0.9995657272831373;0.9995657272831373;0.9995657272831373;0.9995657272831373;0.0009116655989721556;0.0008481322837037536;0.9995657272831373;0.9995657272831373;0.9995657272831373;0.9995657272831373;0.9995657272831373;0.9995657272831373;0.9995657272831373	0.002;0.002;0.002;0.002;0.515;0.460;0.002;0.002;0.002;0.002;0.002;0.002;0.002	0.001;0.001;0.001;0.001;0.087;0.906;0.001;0.001;0.001;0.001;0.001;0.001;0.001	s|4e1.26o27|7e1.6o27|6e1.6o27|5e1.6o27|4e1.6o27|3e1.6o27|2e1.6o27|1e1.6o27|3e1.4o27|4e1.2o27|4e2.6o19|3e2.6o19|3e2.4o19	TRUE	TRUE	TRUE	13	3	1;1;1;1;0;0;1;1;1;1;1;1;1	5	-	149827318-149829055;149827298-149829108;149827298-149829087;149827298-149829070;149827298-149829055;149827298-149829049;149827298-149828909;149827298-149828832;149827297-149829049;149827296-149829055;149826526-149829055;149826526-149829049;149826524-149829049	149826365-149826986;149827037-149827359;149828832-149829259
25	PCNXL2	gene:ENSG00000135749	ENSG00000135749:s:233431072-233431459	0.43266305308579694;7.822831795186297e-05;7.822831795186297e-05;-0.022454789438115075;-0.009185470411559192;-0.05131620711816483;-0.005791136168934306;7.822831795186297e-05	0.9935429862860444;7.164841790701737e-05;7.164841790701737e-05;0.08674278709796951;0.0471843925377102;0.19099516822482418;0.003990668370273482;7.164841790701737e-05	0.003769525912407303;0.9977848836958249;0.9977848836958249;0.7759397234682897;0.8264137112840539;0.6768698780273555;0.938530254905225;0.9977848836958249	0.031;0.003;0.003;0.253;0.281;0.365;0.059;0.003	0.464;0.005;0.005;0.130;0.214;0.172;0.005;0.005	s|1e1.1o1|1e2.1o1|1e3.1o1|1e4.1o1|1e5.1o1|1e6.2o3|1e6.1o3|1e7.1o3	FALSE	TRUE	TRUE	8	8	1;1;1;1;1;0;1;1	1	-	233430249-233431072;233425281-233431072;233425226-233431072;233408883-233431072;233407748-233431072;233398909-233431072;233398868-233431072;233397067-233431072	nan-233407748;nan-233425226;nan-233425281;nan-233430249;233397031-233397067;233398704-233398909;233408850-233408883;233431072-233431459
26	EP400NL	gene:ENSG00000185684	ENSG00000185684:s:132593117-132593444	8.335990282322108e-05;0.20768230748631566;8.335990282322108e-05;8.335990282322108e-05;-0.5157594924334026;8.335990282322108e-05;0.1416200750561302	4.5296718283082665e-05;0.6262533502358314;4.5296718283082665e-05;4.5296718283082665e-05;0.9999909612837858;4.5296718283082665e-05;0.5875227710940104	0.9982268066812169;0.298194398080628;0.9982268066812169;0.9982268066812169;5.215801380020757e-06;0.9982268066812169;0.2011039238939016	0.003;0.456;0.003;0.003;0.526;0.003;0.003	0.005;0.755;0.005;0.005;0.005;0.005;0.219	s|1e1.1o1|1e2.1o2|1e3.1o1|1e4.1o2|1e5.1o4|1e6.1o3|1e7.1o10	FALSE	FALSE	TRUE	7	8	1;0;1;1;0;1;1	12	+	132593227-132593683;132593227-132594313;132593227-132595628;132593227-132598116;132593227-132599003;132593227-132601419;132593227-132604965	132593117-132593444;132593683-132593939;132594313-132594377;132595628-nan;132598116-132598224;132599003-132599090;132601419-132601759;132604965-132605146
27	ZNF746	gene:ENSG00000181220	ENSG00000181220:t:149191080-149191206	0.0003020291563376331;0.5121078015840027;-0.5173992461938809	0.00012043725245478966;0.9988511113296389;0.9991158821342861	0.9960255039684325;0.0007504700285758081;0.0005758591483626674	0.005;0.375;0.619	0.011;0.878;0.111	t|1e1.1o1|2e2.1o3|1e2.1o3	FALSE	TRUE	TRUE	3	3	1;1;0	7	-	149191161-149318219;149191206-149191295;149191161-149191295	149191080-149191206;149191295-149191594;149318219-149318229
28	ZNF746	gene:ENSG00000181220	ENSG00000181220:s:149191295-149191594	0.5189162903803907;-0.5222014342599888;0.0002845455447391678	0.9994185816745511;0.9995831696210786;0.00010732398600714418	0.0003616609166079208;0.00025552070152667916;0.9962109262479806	0.375;0.618;0.005	0.874;0.115;0.011	s|1e1.3o3|1e1.1o3|1e2.1o4	FALSE	TRUE	TRUE	3	3	1;0;1	7	-	149191206-149191295;149191161-149191295;149190063-149191295	149189950-149190063;149191080-149191206;149191295-149191594
29	OBSCN	gene:ENSG00000154358	ENSG00000154358:s:228486171-228486418	0.5095261635718815;-0.44296067177229126;-0.006823290248527275;-1.7008965670161477e-05;-1.7008965670161477e-05;-1.7008965670161477e-05	0.9521363162640019;0.9037179479746837;0.01916851719464603;0.00027302481422528634;0.00027302481422528634;0.00027302481422528634	0.03821793640525248;0.07745273059747304;0.8753340195546641;0.9945650788985302;0.9945650788985302;0.9945650788985302	0.198;0.675;0.103;0.008;0.008;0.008	0.722;0.198;0.056;0.008;0.008;0.008	s|1e1.1o1|1e2.1o2|1e3.1o5|1e4.1o2|1e5.1o4|1e6.1o8	FALSE	FALSE	TRUE	6	7	0;1;1;1;1;1	1	+	228486418-228486960;228486418-228487583;228486418-228491376;228486418-228492004;228486418-228492824;228486418-228494073	228486171-228486418;228486960-228487223;228487583-228487846;228491376-228491639;228492004-228492267;228492824-228493122;228494073-228494339
30	PDE4DIP	gene:ENSG00000178104	ENSG00000178104:t:144881430-144882033	-6.930152546146914e-05;-6.930152546146914e-05;-6.930152546146914e-05;0.045812754568005515;-0.38328314951972087;0.09807560487412592	0.00016618100497237557;0.00016618100497237557;0.00016618100497237557;0.14527497895097238;0.9877394324957591;0.3160600661437163	0.9957932393074251;0.9957932393074251;0.9957932393074251;0.6221830086571517;0.0055892056958936065;0.5694364173935256	0.007;0.007;0.007;0.007;0.403;0.570	0.006;0.006;0.006;0.154;0.006;0.821	t|2e1.1o3|1e1.1o3|2e2.1o3|1e2.1o3|2e3.1o2|1e3.1o2	FALSE	TRUE	TRUE	6	4	1;1;1;0;1;0	1	-	144882033-144886097;144881622-144886097;144882033-144882776;144881622-144882776;144882033-144882446;144881622-144882446	144881430-144882033;144882446-144882701;144882776-144882881;144886097-144886329
31	TAPBPL	gene:ENSG00000139192	ENSG00000139192:t:6561971-6562463	5.769220698818126e-06;0.0013920131224834298;5.769220698818126e-06;-0.05807097467560423;5.769220698818126e-06;-0.217342650164623;5.769220698818126e-06;0.35181835890867275	3.250528173048464e-07;0.00016492813921153258;3.250528173048464e-07;0.1479987565182501;3.250528173048464e-07;0.7584128933506734;3.250528173048464e-07;0.9894358443187132	0.9998790127506597;0.9857073043059249;0.9998790127506597;0.4461397432016436;0.9998790127506597;0.17031157734366753;0.9998790127506597;0.005210183108731928	0.001;0.001;0.001;0.115;0.001;0.731;0.001;0.141	0.002;0.031;0.002;0.002;0.002;0.467;0.002;0.494	t|2e1.1o1|2e2.1o1|2e3.1o1|2e4.1o7|1e4.2o7|2e4.2o7|2e4.7o7|2e5.1o2	TRUE	TRUE	TRUE	8	6	1;1;1;1;1;0;1;1	12	+	6560627-6562233;6560950-6562233;6560982-6562233;6561316-6562233;6561478-6561971;6561478-6562233;6561482-6562233;6561785-6562233	6560617-6560627;6560940-6560950;6560972-6560982;6561238-6561482;6561717-6561785;6561971-6562463
32	TNRC6B	gene:ENSG00000100354	ENSG00000100354:t:40669429-40669607	-0.02546316129663561;0.8535169528703812;-0.7356189551218877;0.0003014426675472795	0.06619937283525544;0.9999965643923304;0.9995383695564761;0.0007233827413237366	0.7599293700922121;2.3455822061694973e-06;0.00035258765204537745;0.989554086336392	0.135;0.052;0.802;0.010	0.017;0.883;0.086;0.017	t|1e1.1o3|1e2.1o3|1e3.1o1|1e4.1o1	FALSE	FALSE	TRUE	4	5	1;0;0;1	22	+	40658177-40669429;40663040-40669429;40666284-40669429;40667227-40669429	nan-40667227;40657836-40658177;40660692-40663040;40666126-40666284;40669429-40669607
33	FAM192A	gene:ENSG00000172775	ENSG00000172775:s:57219737-57219943	0.35917225690641585;0.01807677373882475;-2.978482447014953e-05;-2.978482447014953e-05;-2.978482447014953e-05;-2.978482447014953e-05;-2.978482447014953e-05;-2.978482447014953e-05;-2.978482447014953e-05;-2.978482447014953e-05;-0.5399427471594413;-2.978482447014953e-05;0.008251797647641362;-2.978482447014953e-05	0.9943952013697062;0.03169371947206258;4.8162878564646324e-05;4.8162878564646324e-05;4.8162878564646324e-05;4.8162878564646324e-05;4.8162878564646324e-05;4.8162878564646324e-05;4.8162878564646324e-05;4.8162878564646324e-05;0.9950591071804573;4.8162878564646324e-05;0.02853885130953654;4.8162878564646324e-05	0.002138934066267767;0.8255996099163118;0.998568054637617;0.998568054637617;0.998568054637617;0.998568054637617;0.998568054637617;0.998568054637617;0.998568054637617;0.998568054637617;0.0035995410240589054;0.998568054637617;0.8491151254745386;0.998568054637617	0.003;0.003;0.003;0.003;0.003;0.003;0.003;0.003;0.003;0.003;0.878;0.003;0.086;0.003	0.382;0.106;0.002;0.002;0.002;0.002;0.002;0.002;0.002;0.002;0.347;0.002;0.140;0.002	s|1e1.1o10|1e2.1o5|1e3.8o17|1e3.5o17|1e3.1o17|1e4.1o10|1e5.4o19|4e6.10o40|3e6.10o40|2e6.10o40|1e6.10o40|1e6.8o40|1e6.2o40|1e7.3o8	TRUE	TRUE	TRUE	14	8	1;1;1;1;1;1;1;1;1;1;0;1;1;1	16	-	57212764-57219737;57212444-57219737;57209612-57219737;57209593-57219737;57209502-57219737;57208600-57219737;57208198-57219737;57207781-57219919;57207781-57219895;57207781-57219765;57207781-57219737;57207727-57219737;57207708-57219737;57206786-57219737	57206688-57206786;57207582-57207793;57208081-57208202;57208353-57208798;57209451-57209781;57212414-57212469;57212469-57212764;57219737-57219943
34	TRAF3	gene:ENSG00000131323	ENSG00000131323:s:103243813-103244012	-4.1912596983192685e-05;-4.1912596983192685e-05;-4.1912596983192685e-05;-4.1912596983192685e-05;-4.1912596983192685e-05;0.40193129642225495;-4.1912596983192685e-05;-0.39582860099592354;-4.1912596983192685e-05	6.362339018683342e-06;6.362339018683342e-06;6.362339018683342e-06;6.362339018683342e-06;6.362339018683342e-06;0.9928541833747966;6.362339018683342e-06;0.9925350081108538;6.362339018683342e-06	0.9995155991442048;0.9995155991442048;0.9995155991442048;0.9995155991442048;0.9995155991442048;0.00402234849044636;0.9995155991442048;0.004127719211205028;0.9995155991442048	0.003;0.003;0.003;0.003;0.003;0.442;0.003;0.545;0.003	0.001;0.001;0.001;0.001;0.001;0.833;0.001;0.161;0.001	s|1e1.1o1|1e2.1o1|1e3.1o1|1e4.1o1|1e5.1o1|1e6.1o14|1e7.1o2|1e8.1o8|1e9.1o3	FALSE	FALSE	TRUE	9	10	1;1;1;1;0;0;1;0;1	14	+	103244012-103245067;103244012-103245152;103244012-103257543;103244012-103263003;103244012-103275345;103244012-103296671;103244012-103303147;103244012-103336522;103244012-103352526	103243813-103244012;103245067-nan;103245152-nan;103257543-103257633;103263003-103263128;103275345-103275466;103296671-103296809;103303147-103303194;103336522-103336783;103352526-103352606
35	PRRC2C	gene:ENSG00000117523	ENSG00000117523:s:171558508-171558744	-0.6090284642929409;1.4262301744521659e-05;1.4262301744521659e-05;0.607304728153339	0.9975113919536457;0.0003642283354215906;0.0003642283354215906;0.9979327947615567	0.0018378924356692306;0.9921924425487265;0.9921924425487265;0.001512794749257996	0.885;0.010;0.010;0.094	0.284;0.011;0.011;0.693	s|2e1.1o4|2e1.3o4|1e2.2o9|2e2.2o9	TRUE	TRUE	TRUE	4	3	1;1;1;0	1	+	171558744-171560291;171558744-171560294;171558540-171560726;171558744-171560726	171558508-171558744;171560291-171560343;171560704-171562650
36	TMEM156	gene:ENSG00000121895	ENSG00000121895:s:39033846-39034063	0.03777456148571556;1.0248702657508747e-05;0.09128353154697626;1.0248702657508747e-05;1.0248702657508747e-05;1.0248702657508747e-05;1.0248702657508747e-05;1.0248702657508747e-05;1.0248702657508747e-05;1.0248702657508747e-05;-0.29238615891546943;1.0248702657508747e-05;1.0248702657508747e-05;1.0248702657508747e-05	0.07714365606977347;7.347709654257773e-07;0.3792375172594616;7.347709654257773e-07;7.347709654257773e-07;7.347709654257773e-07;7.347709654257773e-07;7.347709654257773e-07;7.347709654257773e-07;7.347709654257773e-07;0.997606664596541;7.347709654257773e-07;7.347709654257773e-07;7.347709654257773e-07	0.6368183502573471;0.9998843237262445;0.4616236974661772;0.9998843237262445;0.9998843237262445;0.9998843237262445;0.9998843237262445;0.9998843237262445;0.9998843237262445;0.9998843237262445;0.0007682197276581704;0.9998843237262445;0.9998843237262445;0.9998843237262445	0.001;0.001;0.682;0.001;0.001;0.001;0.001;0.001;0.001;0.001;0.312;0.001;0.001;0.001	0.112;0.001;0.853;0.001;0.001;0.001;0.001;0.001;0.001;0.001;0.020;0.001;0.001;0.001	s|1e1.1o1|1e2.2o2|1e2.1o2|1e3.1o1|1e4.1o1|1e5.1o1|1e6.1o1|1e7.1o1|1e8.1o1|1e9.1o1|1e10.2o10|1e10.1o10|1e11.3o9|1e12.1o3	FALSE	TRUE	TRUE	14	13	1;1;1;1;1;1;1;1;1;1;0;1;1;1	4	-	39033113-39033846;39030223-39033846;39030217-39033846;39027346-39033846;39024949-39033846;39017989-39033846;39016374-39033846;39008559-39033846;39005473-39033846;39003003-39033846;39000529-39033846;39000363-39033846;38995618-39033846;38990590-39033846	nan-39003003;nan-39005473;nan-39008559;nan-39016374;nan-39017989;38990471-38990608;38995355-38995618;38999907-39000529;39024601-39024949;39027255-39027346;39030065-39030223;39033048-39033113;39033846-39034063
37	NDUFAF6	gene:ENSG00000156170	ENSG00000156170:s:96044223-96044371	-0.006360903488926525;-0.3115181088814988;5.7138074691502536e-05;5.7138074691502536e-05;-0.0017291024855246647;0.1792673620525941;0.01979966711543303;5.7138074691502536e-05;5.7138074691502536e-05	0.004899399740120668;0.9862066153557651;6.452250164424863e-05;6.452250164424863e-05;0.0007973286887204706;0.5403569964119975;0.06226742447360913;6.452250164424863e-05;6.452250164424863e-05	0.9334007527089788;0.005748195164497871;0.997987996065388;0.997987996065388;0.9798340267462666;0.3731931650351671;0.796867952900448;0.997987996065388;0.997987996065388	0.062;0.332;0.003;0.003;0.033;0.503;0.062;0.003;0.003	0.005;0.005;0.005;0.005;0.005;0.796;0.171;0.005;0.005	s|1e1.1o4|2e1.1o4|3e1.1o4|1e2.1o4|2e2.1o4|1e3.1o6|2e3.1o6|3e3.1o6|2e4.1o6	TRUE	FALSE	TRUE	9	5	1;0;1;1;1;0;0;1;1	8	+	96044322-96046236;96044326-96046236;96044371-96046236;96044322-96046850;96044326-96046850;96044322-96047682;96044326-96047682;96044371-96047682;96044326-96053798	96044223-96044371;96046236-96046350;96046850-96046951;96047682-96047804;96053798-96053854
38	TPT1-AS1	gene:ENSG00000170919	ENSG00000170919:t:45918424-45918581	-7.176228713895232e-06;-7.176228713895232e-06;-7.176228713895232e-06;-7.176228713895232e-06;-7.176228713895232e-06;-0.4186593749038343;0.07198067747763846;-7.176228713895232e-06;0.005305068851614347;0.1060631857120907;-7.176228713895232e-06;-7.176228713895232e-06;-7.176228713895232e-06	3.4261019461015064e-05;3.4261019461015064e-05;3.4261019461015064e-05;3.4261019461015064e-05;3.4261019461015064e-05;0.957125699846853;0.26675215278009934;3.4261019461015064e-05;0.04645169539102065;0.42304492023972035;3.4261019461015064e-05;3.4261019461015064e-05;3.4261019461015064e-05	0.9987335797313162;0.9987335797313162;0.9987335797313162;0.9987335797313162;0.9987335797313162;0.031728325008167024;0.4554623129528565;0.9987335797313162;0.8287995317572275;0.42093970232753447;0.9987335797313162;0.9987335797313162;0.9987335797313162	0.003;0.003;0.003;0.003;0.003;0.564;0.003;0.003;0.382;0.037;0.003;0.003;0.003	0.003;0.003;0.003;0.003;0.003;0.141;0.175;0.003;0.416;0.244;0.003;0.003;0.003	t|7e1.1o2|1e2.2o28|2e2.2o28|3e2.2o28|5e2.2o28|6e2.2o28|7e2.2o28|2e2.20o28|5e2.20o28|6e2.20o28|7e2.20o28|6e3.1o2|7e3.1o2	TRUE	TRUE	TRUE	13	4	1;1;1;1;1;0;1;1;0;0;1;1;0	13	+	45915522-45918514;45915749-45918424;45915749-45918432;45915749-45918438;45915749-45918440;45915749-45918464;45915749-45918514;45915765-45918432;45915765-45918440;45915765-45918464;45915765-45918514;45917675-45918464;45917675-45918514	45915480-45915522;45915554-45915765;45917561-45917675;45918424-45918581
39	AC002467.7	gene:ENSG00000241764	ENSG00000241764:t:107383262-107383848	-0.00024381951978493609;-0.00024381951978493609;-0.00024381951978493609;-0.5237188224237839;-0.00024381951978493609;0.5455195699922973	0.00013440386193101572;0.00013440386193101572;0.00013440386193101572;0.9931536208158054;0.00013440386193101572;0.9963906953263479	0.9969695294852065;0.9969695294852065;0.9969695294852065;0.004933249691504993;0.9969695294852065;0.0025685808665870864	0.008;0.008;0.008;0.780;0.008;0.189	0.003;0.003;0.003;0.260;0.003;0.727	t|1e1.1o2|1e2.1o1|1e3.4o4|1e3.3o4|1e3.2o4|1e3.1o4	TRUE	FALSE	TRUE	6	4	0;0;1;0;1;1	7	-	107383848-107384818;107383848-107384504;107383848-107384386;107383848-107384378;107383848-107384342;107383848-107383930	107383262-107383848;107383930-107384495;107384504-107384573;107384818-107385026
40	CCNT2-AS1	gene:ENSG00000224043	ENSG00000224043:t:135626514-135626611	-0.033404266253038856;2.5131410852868444e-05;0.7460340432977428;2.5131410852868444e-05;-0.6059520669310177;2.5131410852868444e-05	0.12431816466600978;0.00046936350576930587;0.9999821577601243;0.00046936350576930587;0.9867607521302291;0.00046936350576930587	0.7327951493352555;0.9928273296644174;1.2499244758994736e-05;0.9928273296644174;0.010470242145758757;0.9928273296644174	0.231;0.009;0.009;0.009;0.731;0.009	0.073;0.010;0.753;0.010;0.135;0.010	t|1e1.1o4|1e2.1o2|1e3.2o5|1e3.1o5|1e4.1o1|1e5.1o1	TRUE	FALSE	TRUE	6	6	0;1;0;1;0;1	2	-	135626611-135676133;135626611-135667634;135626611-135635090;135626611-135634987;135626611-135633677;135626611-135630137	135626514-135626611;135630137-nan;135633677-135633708;135634987-135635213;135667634-135667644;135676133-135676280
41	SLC16A1-AS1	gene:ENSG00000226419	ENSG00000226419:s:113499037-113500344	-0.0001374668654133955;-0.0001374668654133955;-0.0001374668654133955;0.4812992175736589;-0.0001374668654133955;-0.46588044698530867	0.00013193298502622833;0.00013193298502622833;0.00013193298502622833;0.9687328066364854;0.00013193298502622833;0.9590039038479488	0.9964350758111579;0.9964350758111579;0.9964350758111579;0.02391863051695132;0.9964350758111579;0.03153737993711836	0.007;0.007;0.007;0.225;0.007;0.746	0.005;0.005;0.005;0.702;0.005;0.278	s|5e2.1o1|1e3.1o6|2e3.1o6|3e3.1o6|4e3.1o6|5e3.1o6	TRUE	FALSE	TRUE	6	3	1;1;1;0;1;0	1	+	113500344-113501643;113499213-113503099;113499543-113503099;113499578-113503099;113499995-113503099;113500344-113503099	113499037-113500344;113501643-113501736;113503099-113503197
42	SLC16A1-AS1	gene:ENSG00000226419	ENSG00000226419:t:113503099-113503197	-0.00013709306674308133;-0.00013709306674308133;0.48915256796892853;-0.00013709306674308133;-0.4753103786305619;-0.00013709306674308133	0.00012636511895438185;0.00012636511895438185;0.9773422772090921;0.00012636511895438185;0.9695190067257473;0.00012636511895438185	0.9965166062921585;0.9965166062921585;0.017128351078037795;0.9965166062921585;0.02312827625429803;0.9965166062921585	0.007;0.007;0.225;0.007;0.746;0.007	0.005;0.005;0.711;0.005;0.270;0.005	t|1e1.1o8|1e1.2o8|1e1.3o8|1e1.6o8|1e1.7o8|1e2.1o1	TRUE	FALSE	TRUE	6	3	1;1;0;1;0;1	1	+	113499213-113503099;113499543-113503099;113499578-113503099;113499995-113503099;113500344-113503099;113501736-113503099	113499037-113500344;113501643-113501736;113503099-113503197
43	GEMIN4	gene:ENSG00000179409	ENSG00000179409:t:650681-652591	7.144314301239988e-05;7.144314301239988e-05;0.22871178413131643;7.144314301239988e-05;7.144314301239988e-05;7.144314301239988e-05;7.144314301239988e-05;-0.24964105694996805	4.191933251032584e-05;4.191933251032584e-05;0.8437674847878261;4.191933251032584e-05;4.191933251032584e-05;4.191933251032584e-05;4.191933251032584e-05;0.9607177985925146	0.9984053363839772;0.9984053363839772;0.10487083203218311;0.9984053363839772;0.9984053363839772;0.9984053363839772;0.9984053363839772;0.013296197164352264	0.003;0.003;0.714;0.003;0.003;0.003;0.003;0.269	0.005;0.005;0.968;0.005;0.005;0.005;0.005;0.005	t|2e1.1o1|2e2.1o4|2e3.1o8|1e3.1o8|2e4.1o2|2e5.1o2|3e6.1o2|2e6.1o2	FALSE	TRUE	TRUE	8	7	0;1;0;1;1;1;1;0	17	-	651272-657199;651272-655858;651272-655373;651271-655373;651272-654891;651272-653237;651699-653054;651272-653054	650681-652591;653054-653161;653237-653488;654891-655278;655373-655501;655858-656016;657199-657239
44	ISG20L2	gene:ENSG00000143319	ENSG00000143319:t:156696698-156697600	0.20614473716096154;-0.47803737975315674;-7.490864603297849e-05;0.10881661907851639;-7.490864603297849e-05;-6.0439221393195404e-05	0.6526480073894415;0.9928132801483599;3.572527059081519e-05;0.4762141494195576;3.572527059081519e-05;2.814646534707386e-05	0.2709299828894812;0.0049197563202151295;0.9981931271023223;0.35896824182333714;0.9981931271023223;0.9985505969083704	0.187;0.755;0.005;0.035;0.005;0.004	0.482;0.288;0.004;0.226;0.004;0.003	t|3e1.1o4|2e1.1o4|1e1.1o4|2e2.1o2|2e3.1o2|i	FALSE	TRUE	TRUE	6	4	1;0;1;1;1;0	1	-	156697600-156698207;156697561-156698207;156696761-156698207;156697561-156698146;156697561-156698069;156697600-156697601	156696698-156697600;156698069-156698079;156698146-156698156;156698207-156698591
45	HINFP	gene:ENSG00000172273	ENSG00000172273:t:118994278-118994394	0.5190808820004921;-0.5190808820004905	0.9929029861780919;0.9929029861780918	0.0051031371849912565;0.005103137184991224	0.334;0.666	0.850;0.150	t|1e1.1o7|1e2.2o5	FALSE	FALSE	TRUE	2	3	1;1	11	+	118992349-118994278;118992723-118994278	118992297-118992359;118992493-118992723;118994278-118994394
46	HINFP	gene:ENSG00000172273	ENSG00000172273:s:118992297-118992359	0.0123928830306694;-0.00043587106479874547;0.23741521097031246;-0.33578803460423257;8.58211755256691e-07;8.58211755256691e-07;8.58211755256691e-07	0.04831306403691865;3.8011118464478806e-05;0.8370529605778352;0.9863209633446429;1.4266353108896163e-06;1.4266353108896163e-06;1.4266353108896163e-06	0.8233928639009451;0.9952155446599705;0.10706315401609157;0.0069391391327211505;0.9996801951503119;0.9996801951503119;0.9996801951503119	0.409;0.018;0.146;0.412;0.002;0.002;0.002	0.486;0.002;0.414;0.086;0.002;0.002;0.002	s|1e1.1o2|1e1.2o2|1e2.1o2|1e3.1o15|2e3.1o15|1e4.2o8|1e5.2o4	TRUE	TRUE	TRUE	7	6	0;1;1;0;1;1;1	11	+	118992349-118992493;118992349-118992498;118992349-118994278;118992349-118997645;118992359-118997645;118992349-119001435;118992349-119002245	118992297-118992359;118992493-118992723;118994278-118994394;118997645-118997835;119001366-119001664;119002119-119002356
47	BCL2L1	gene:ENSG00000171552	ENSG00000171552:t:30309458-30310151	-0.08924147519633535;0.009215107537702443;-4.064057031538973e-06;0.0006008447836020357;-0.028455633364121196;0.33245528135682795;-0.0031669874646335756;0.002522556928990727;-4.064057031538973e-06;-4.064057031538973e-06;0.002522556928990727;-4.064057031538973e-06;-0.0031669874646335756;-0.03028443940985232	0.36721252724111897;0.02003859741327987;2.2326153028326692e-06;8.590697843450352e-05;0.045436310412837855;0.9908562734611679;0.0009811436563079803;0.0006517469164912955;2.2326153028326692e-06;2.2326153028326692e-06;0.0006517469164912955;2.2326153028326692e-06;0.0009811436563079803;0.11520478737075682	0.2926882883126698;0.8611548476618129;0.9997153803161402;0.993535566498201;0.7209257269739549;0.004364692844512997;0.9674896761351888;0.9739494788641214;0.9997153803161402;0.9997153803161402;0.9739494788641214;0.9997153803161402;0.9674896761351888;0.7487942864117758	0.162;0.084;0.001;0.001;0.104;0.043;0.043;0.001;0.001;0.001;0.001;0.001;0.043;0.517	0.001;0.136;0.001;0.021;0.001;0.364;0.001;0.040;0.001;0.001;0.040;0.001;0.001;0.386	t|4e1.5o6|3e1.5o6|4e1.3o6|3e1.3o6|4e1.1o6|3e1.1o6|4e2.1o2|3e2.1o2|3e3.6o6|4e3.4o6|3e3.4o6|4e3.1o6|3e3.1o6|i	TRUE	TRUE	TRUE	14	4	0;0;1;1;0;0;0;0;1;0;1;1;1;0	20	-	30310151-30311667;30310133-30311667;30310151-30311651;30310133-30311651;30310151-30311538;30310133-30311538;30310151-30310421;30310133-30310421;30310133-30310280;30310151-30310247;30310133-30310247;30310151-30310220;30310133-30310220;30310151-30310152	30309458-30310151;30310152-30310219;30310220-30310400;30310421-30310901;30311538-30311792	30310152-30310219
48	CCDC77	gene:ENSG00000120647	ENSG00000120647:t:514677-514730	0.0626089841165744;-9.360109000579436e-05;0.2741127691400345;-0.48745901093425303;-9.360109000579436e-05;-0.0019430198932413314;-9.360109000579436e-05;-9.360109000579436e-05;-9.360109000579436e-05;-9.360109000579436e-05	0.2098548511584659;0.00010817933270037118;0.9445376647768318;0.9994460033744906;0.00010817933270037118;0.004841927548998147;0.00010817933270037118;0.00010817933270037118;0.00010817933270037118;0.00010817933270037118	0.669529634776747;0.9975011747801327;0.02684719321633554;0.00017343355012511275;0.9975011747801327;0.9417913852014993;0.9975011747801327;0.9975011747801327;0.9975011747801327;0.9975011747801327	0.405;0.005;0.005;0.505;0.005;0.055;0.005;0.005;0.005;0.005	0.630;0.003;0.309;0.003;0.003;0.037;0.003;0.003;0.003;0.003	t|1e1.1o10|1e1.7o10|1e2.1o6|1e2.5o6|1e3.1o7|1e3.2o7|1e3.5o7|1e3.6o7|1e3.7o7|1e4.1o1	TRUE	FALSE	TRUE	10	5	0;1;1;1;1;0;1;1;1;1	12	+	498652-514677;498693-514677;504387-514677;504407-514677;510798-514677;510850-514677;510888-514677;510956-514677;511100-514677;513779-514677	nan-513779;498514-498828;504290-504407;510742-511100;514677-514730
49	CCDC77	gene:ENSG00000120647	ENSG00000120647:t:520913-521144	0.0002789249293623227;0.0002789249293623227;0.0002789249293623227;0.5580920223986636;-0.5800182721060497;0.0002789249293623227;0.0002789249293623227	0.00044692337937380906;0.00044692337937380906;0.00044692337937380906;0.98145911060852;0.9986004339567575;0.00044692337937380906;0.00044692337937380906	0.9942674945822614;0.9942674945822614;0.9942674945822614;0.014871490170757642;0.0011027986991352101;0.9942674945822614;0.9942674945822614	0.005;0.005;0.005;0.376;0.598;0.005;0.005	0.012;0.012;0.012;0.929;0.012;0.012;0.012	t|1e1.1o10|1e2.1o6|1e3.2o7|1e4.1o2|1e5.1o2|1e6.1o2|1e6.2o2	TRUE	FALSE	TRUE	7	7	0;1;1;0;0;1;1	12	+	498652-520913;504387-520913;510850-520913;514730-520913;518587-520913;519644-520913;520027-520913	498514-498828;504290-504407;510742-511100;514677-514730;518534-518587;519454-520027;520913-521144
50	SIN3B	gene:ENSG00000127511	ENSG00000127511:t:16974491-16974609	4.089776534944938e-06;4.089776534944938e-06;4.089776534944938e-06;-0.030077517063049272;-0.01770852204263106;0.5455526168956426;0.0021276120551574976;4.089776534944938e-06;-0.2934757788987091	4.6814156122651485e-05;4.6814156122651485e-05;4.6814156122651485e-05;0.11602142330216739;0.02807748241029271;0.9999910971165571;0.0012194790530564896;4.6814156122651485e-05;0.8027429411848661	0.998219383571647;0.998219383571647;0.998219383571647;0.7539075195085813;0.8269929430125516;3.782237762145187e-06;0.9767610702569265;0.998219383571647;0.15255595443014736	0.004;0.004;0.004;0.404;0.100;0.004;0.004;0.004;0.487	0.004;0.004;0.004;0.245;0.004;0.556;0.038;0.004;0.142	t|1e1.1o6|1e2.1o3|1e3.1o6|1e4.1o3|1e5.1o5|1e5.3o5|1e5.4o5|1e6.2o3|1e6.3o3	TRUE	FALSE	TRUE	9	7	1;1;1;0;0;1;1;1;1	19	+	16962345-16974491;16963969-16974491;16965072-16974491;16973370-16974491;16973790-16974491;16973835-16974491;16973917-16974491;16974112-16974491;16974173-16974491	16962223-16962679;16963880-16963969;16964954-16966556;16973163-16973370;16973695-16973917;16973980-16974173;16974491-16974609
51	HKR1	gene:ENSG00000181666	ENSG00000181666:t:37814435-37814472	0.00019245463132906842;-0.0038878850772759823;-0.4655644312483307;0.4812852948967947	0.00010809398530473843;0.0017560926000454846;0.9978352571165195;0.9999671116333992	0.9963232255373125;0.9548985249234608;0.0012104111578511434;6.55760745130236e-06	0.005;0.048;0.941;0.005	0.009;0.009;0.491;0.491	t|1e1.1o1|1e2.1o3|1e3.1o2|1e4.1o1	FALSE	FALSE	TRUE	4	5	0;0;0;1	19	+	37804214-37814435;37809088-37814435;37813134-37814435;37813381-37814435	37803739-37804214;37808813-37809088;37813087-37813134;37813340-37813381;37814435-37814472
52	BAIAP2	gene:ENSG00000175866	ENSG00000175866:s:79082275-79082627	0.1994895173573239;-4.674543658266919e-05;7.555076072378837e-05;-0.2861848702308303;-3.584436704250358e-05	0.5745607412083238;0.00011336792344425496;0.04590548860828796;0.9582603001451864;8.402056329314535e-05	0.3453327973005277;0.9961098407161694;0.8294548633835409;0.01624475674061643;0.9970361904680555	0.218;0.007;0.457;0.318;0.006	0.523;0.007;0.458;0.007;0.005	s|1e1.1o2|1e2.1o2|1e3.1o2|1e4.1o4|i	FALSE	FALSE	TRUE	5	5	0;1;0;0;0	17	+	79082309-79082768;79082309-79083823;79082309-79084714;79082309-79089570;79082627-79082628	79082275-79082627;79082628-79082767;79082768-79083187;79083823-79084312;79084714-79084759;79089570-79090025	79082628-79082767
53	IL12RB1	gene:ENSG00000096996	ENSG00000096996:t:18169805-18170566	6.369596850535413e-05;-0.4108580253857398;-0.005621345569135264;0.45948015264892417	1.595907258897981e-05;0.9942983205375021;0.0018618167080525104;0.9987193688875725	0.9986435786745076;0.0034283682028419804;0.9408319450182674;0.0007260537022502534	0.004;0.529;0.052;0.417	0.006;0.119;0.006;0.869	t|1e1.1o2|1e2.3o3|2e2.1o3|1e2.1o3	TRUE	TRUE	TRUE	4	3	1;1;1;0	19	-	18170423-18171932;18170423-18170717;18170566-18170704;18170423-18170704	18169805-18170566;18170704-18170895;18171932-18172007
54	PSMD5-AS1	gene:ENSG00000226752	ENSG00000226752:t:123609572-123609631	-1.9859333590897738e-05;0.0009471097279072516;-1.9859333590897738e-05;-1.9859333590897738e-05;-0.42111254634646633;-1.9859333590897738e-05;-1.9859333590897738e-05;-1.9859333590897738e-05;-1.9859333590897738e-05;-1.9859333590897738e-05;0.3986157687652136;-1.9859333590897738e-05	1.1701571952393506e-05;0.00024951749236478684;1.1701571952393506e-05;1.1701571952393506e-05;0.9938257154147128;1.1701571952393506e-05;1.1701571952393506e-05;1.1701571952393506e-05;1.1701571952393506e-05;1.1701571952393506e-05;0.9769818412837105;1.1701571952393506e-05	0.9992847360497652;0.9894290637508197;0.9992847360497652;0.9992847360497652;0.0036664652215674387;0.9992847360497652;0.9992847360497652;0.9992847360497652;0.9992847360497652;0.9992847360497652;0.015263739039268179;0.9992847360497652	0.002;0.002;0.002;0.002;0.447;0.002;0.002;0.002;0.002;0.002;0.530;0.002	0.002;0.025;0.002;0.002;0.048;0.002;0.002;0.002;0.002;0.002;0.910;0.002	t|1e1.1o1|1e2.2o5|1e3.1o5|1e4.1o7|1e4.2o7|1e4.6o7|1e4.7o7|1e5.1o4|1e5.2o4|1e5.4o4|1e6.1o2|1e6.2o2	TRUE	FALSE	TRUE	12	7	0;0;1;1;0;1;1;0;1;1;0;0	9	+	123604718-123609572;123605717-123609572;123607177-123609572;123607468-123609572;123607474-123609572;123607626-123609572;123607749-123609572;123608104-123609572;123608165-123609572;123608228-123609572;123609081-123609572;123609139-123609572	123604084-123604718;123605274-123605717;123606991-123607177;123607271-123607749;123607843-123608228;123608788-123609139;123609572-123609631
55	DPY19L4	gene:ENSG00000156162	ENSG00000156162:s:95751873-95752018	0.00018187785334682793;0.00018187785334682793;0.00018187785334682793;0.00018187785334682793;-0.3554697976634668;0.00018187785334682793;0.25631791319746533;0.00018187785334682793;0.00018187785334682793;0.00018187785334682793;0.00018187785334682793	0.00020683862770909565;0.00020683862770909565;0.00020683862770909565;0.00020683862770909565;0.9788097667162239;0.00020683862770909565;0.7166146725748418;0.00020683862770909565;0.00020683862770909565;0.00020683862770909565;0.00020683862770909565	0.9970732095174376;0.9970732095174376;0.9970732095174376;0.9970732095174376;0.015585762017492066;0.9970732095174376;0.23060881694945454;0.9970732095174376;0.9970732095174376;0.9970732095174376;0.9970732095174376	0.003;0.003;0.003;0.003;0.381;0.003;0.591;0.003;0.003;0.003;0.003	0.007;0.007;0.007;0.007;0.007;0.007;0.930;0.007;0.007;0.007;0.007	s|3e1.1o1|3e2.1o1|3e3.1o1|3e4.1o2|3e4.2o2|3e5.1o1|3e6.1o4|3e6.4o4|3e7.1o5|3e7.2o5|3e7.4o5	FALSE	TRUE	TRUE	11	8	1;1;1;0;0;1;0;1;1;1;1	8	+	95752018-95752255;95752018-95752704;95752018-95755928;95752018-95756571;95752018-95756713;95752018-95765714;95752018-95768264;95752018-95768269;95752018-95773905;95752018-95773928;95752018-95773930	95751873-95752018;95752255-nan;95752704-nan;95755928-nan;95756571-95757312;95765714-95765986;95768264-95768387;95773905-95774062
56	TTLL1	gene:ENSG00000100271	ENSG00000100271:s:43471480-43471596	-0.3285635595441452;0.06400490805603853;-0.006998884165924617;0.14913575217865255	0.9641171338710561;0.2212831108560018;0.005363543084048109;0.5049899967445199	0.020739078653387977;0.44810101999720914;0.9284072696215956;0.3897099853156248	0.371;0.007;0.064;0.552	0.046;0.148;0.005;0.801	s|1e1.1o1|1e2.1o1|1e3.1o2|1e4.1o6	FALSE	FALSE	TRUE	4	5	1;1;0;0	22	-	43470679-43471480;43468078-43471480;43466248-43471480;43465850-43471480	43465610-43465850;43466177-43466248;43467932-43468078;43470504-43470679;43471480-43471596
57	PRKY	gene:ENSG00000099725	ENSG00000099725:s:7193947-7194210	-5.574660614633107e-05;0.0033939137962079235;0.11907908200460586;-5.574660614633107e-05;-5.574660614633107e-05;-5.574660614633107e-05;-0.34172859716578113;-0.0024219157694396437;-0.008494870793280596;0.019393629928020482;0.1841527435761162;-5.574660614633107e-05;-0.008494870793280596;-5.574660614633107e-05	1.996822321494007e-05;0.025829815133488532;0.5258682094598587;1.996822321494007e-05;1.996822321494007e-05;1.996822321494007e-05;0.990958625353964;0.001390712633583529;0.009040783795061336;0.07678148886656122;0.8646767791336895;1.996822321494007e-05;0.009040783795061336;1.996822321494007e-05	0.9992386506916795;0.8543373058545101;0.33431588299962917;0.9992386506916795;0.9992386506916795;0.9992386506916795;0.0020960763959764206;0.9753349748870047;0.9155977600366844;0.7890087475056364;0.04033804581365854;0.9992386506916795;0.9155977600366844;0.9992386506916795	0.003;0.181;0.038;0.003;0.003;0.003;0.364;0.038;0.074;0.217;0.003;0.003;0.074;0.003	0.001;0.201;0.236;0.001;0.001;0.001;0.001;0.001;0.001;0.329;0.225;0.001;0.001;0.001	s|1e1.1o1|1e2.1o3|1e2.2o3|1e3.1o1|1e4.1o1|1e5.1o2|1e5.2o2|1e6.1o1|1e7.1o1|1e8.1o11|1e9.1o6|1e10.1o5|1e11.1o1|1e12.1o1	FALSE	TRUE	TRUE	14	13	1;1;1;1;1;1;1;1;1;0;1;1;1;1	Y	+	7194210-7194650;7194210-7196068;7194210-7196072;7194210-7196431;7194210-7197416;7194210-7199915;7194210-7199919;7194210-7201000;7194210-7208004;7194210-7209156;7194210-7224176;7194210-7235397;7194210-7243753;7194210-7369050	7193947-7194210;7194650-7194907;7196068-7196189;7196431-nan;7197416-nan;7199915-7200036;7201000-7201149;7208004-7208649;7209156-7209275;7224176-7224271;7235397-7235474;7243753-7243763;7369050-7369060
58	RP5-886K2.3	gene:ENSG00000236810	ENSG00000236810:t:24098396-24098656	-0.1257580050075805;-0.022736646793465865;-0.027333872097351896;0.36686594350101687	0.6372847300489797;0.019292813060400767;0.10498467593741442;0.9515457939835343	0.1274702202811422;0.7684524121944211;0.7582481936349231;0.033520029946257815	0.177;0.083;0.399;0.337	0.006;0.006;0.285;0.704	t|1e1.1o4|1e2.3o3|1e2.2o3|1e2.1o3	TRUE	FALSE	TRUE	4	3	1;1;1;0	1	-	24098656-24104689;24098656-24098797;24098656-24098762;24098656-24098758	24098396-24098656;24098758-24098916;24104689-24104777
59	METTL21A	gene:ENSG00000144401	ENSG00000144401:t:208446077-208446884	-1.5676374700024694e-05;-0.38653513432718156;0.4653213330373158;-0.06798791529814771;-1.5676374700024694e-05;-1.5676374700024694e-05;0.018196618038637126;-1.5676374700024694e-05;-1.5676374700024694e-05	1.0659947117867614e-05;0.9379224307318059;0.9958193925865155;0.24133797275388202;1.0659947117867614e-05;1.0659947117867614e-05;0.023026276099550554;1.0659947117867614e-05;1.0659947117867614e-05	0.9992050010022658;0.0462705286428553;0.0026442844575746602;0.44304726669540473;0.9992050010022658;0.9992050010022658;0.8191133652386854;0.9992050010022658;0.9992050010022658	0.003;0.734;0.100;0.149;0.003;0.003;0.003;0.003;0.003	0.002;0.329;0.568;0.002;0.002;0.002;0.091;0.002;0.002	t|1e1.1o4|2e2.1o13|1e2.1o13|2e3.1o9|1e3.1o9|2e4.3o8|2e5.1o2|1e5.1o2|2e6.1o1	FALSE	TRUE	TRUE	9	7	1;0;0;1;1;1;1;1;1	2	-	208446670-208488953;208446884-208486530;208446670-208486530;208446884-208485365;208446670-208485365;208446884-208477422;208446884-208461803;208446670-208461803;208446884-208459333	208446077-208446884;208459333-208459450;208461803-208461838;208473839-208478167;208485365-208485514;208486530-208486641;208488953-208489290
60	AC009120.6	gene:ENSG00000259972	ENSG00000259972:s:74366465-74366511	-0.008137268312215791;-0.38191304492536304;4.892385384044778e-05;0.03326330155163543;4.892385384044778e-05;4.892385384044778e-05;4.892385384044778e-05;4.892385384044778e-05;4.892385384044778e-05;0.00862767095609438;4.892385384044778e-05;-0.0013058425063802732;4.892385384044778e-05;0.01172628559770534;-0.00023600384733430828;-0.008137268312215791;0.10224112352130947;4.892385384044778e-05	0.00292342975567576;0.9998805502696568;1.756501746190023e-05;0.11142047968818024;1.756501746190023e-05;1.756501746190023e-05;1.756501746190023e-05;1.756501746190023e-05;1.756501746190023e-05;0.010294428036279737;1.756501746190023e-05;0.0001642221849100299;1.756501746190023e-05;0.04119519805213692;3.400567645672986e-05;0.00292342975567576;0.3524028533728232;1.756501746190023e-05	0.9160200398642794;6.76340509426776e-05;0.9994293724671989;0.7273488653025499;0.9994293724671989;0.9994293724671989;0.9994293724671989;0.9994293724671989;0.9994293724671989;0.915063340039728;0.9994293724671989;0.9855777933237299;0.9994293724671989;0.8352541319131705;0.9965144960685713;0.9160200398642794;0.5249946706988451;0.9994293724671989	0.060;0.395;0.001;0.060;0.001;0.001;0.001;0.001;0.001;0.001;0.001;0.030;0.001;0.150;0.016;0.060;0.222;0.001	0.002;0.002;0.002;0.194;0.002;0.002;0.002;0.002;0.002;0.079;0.002;0.002;0.002;0.233;0.002;0.002;0.464;0.002	s|1e1.2o2|1e1.1o2|1e2.1o1|1e3.1o1|1e4.1o1|1e5.1o1|1e6.1o1|1e7.1o1|1e8.1o1|1e9.1o1|1e10.1o1|1e11.1o12|1e12.1o2|1e13.1o2|1e14.1o5|1e15.7o11|1e15.1o11|1e16.1o1	FALSE	TRUE	TRUE	18	17	1;1;1;1;1;1;1;1;1;1;1;1;1;1;0;1;1;1	16	-	74365606-74366465;74365601-74366465;74365363-74366465;74364702-74366465;74362320-74366465;74361587-74366465;74361279-74366465;74361117-74366465;74359686-74366465;74355420-74366465;74352877-74366465;74344032-74366465;74342464-74366465;74340577-74366465;74340319-74366465;74339478-74366465;74339469-74366465;74309142-74366465	nan-74342464;nan-74361117;nan-74361279;nan-74362320;nan-74364702;nan-74365363;74309132-74309142;74339100-74339478;74340153-74340319;74340504-74340577;74343897-74344205;74352781-74352877;74355268-74355420;74359493-74359686;74361466-74361587;74365485-74365606;74366465-74366511
61	FRS2	gene:ENSG00000166225	ENSG00000166225:s:69864129-69864310	-0.00019951422119361513;0.3324489182223418;0.09642950911871148;-0.00019951422119361513;-0.00019951422119361513;-0.00019951422119361513;-0.5228061073877933;-0.00019951422119361513	0.00022000738849098708;0.9747683225269024;0.4021775523090891;0.00022000738849098708;0.00022000738849098708;0.00022000738849098708;0.991631143970351;0.00022000738849098708	0.9961869102640363;0.017391598894120303;0.35988055593701124;0.9961869102640363;0.9961869102640363;0.9961869102640363;0.006434961396380445;0.9961869102640363	0.008;0.008;0.008;0.008;0.008;0.008;0.945;0.008	0.004;0.359;0.198;0.004;0.004;0.004;0.423;0.004	s|1e1.1o1|1e2.1o1|1e3.1o5|1e4.1o3|1e5.1o1|1e6.1o1|1e7.2o10|1e8.2o8	FALSE	FALSE	TRUE	8	9	1;0;0;0;1;1;0;0	12	+	69864310-69867808;69864310-69874079;69864310-69879982;69864310-69885318;69864310-69910044;69864310-69924070;69864310-69924645;69864310-69955960	69864129-69864310;69867808-69867988;69874079-69874139;69879982-69880077;69885318-69885431;69910044-69910301;69924070-69924145;69924603-69924740;69955928-69956054
62	TRIP12	gene:ENSG00000153827	ENSG00000153827:t:230724092-230724290	0.3556456692467883;0.000386053507746651;0.000386053507746651;-0.3884259269592888	0.8925229384222367;0.0005956301540099646;0.0005956301540099646;0.973106380280916	0.08501703983546396;0.9909228090398293;0.9909228090398293;0.02026616194534614	0.560;0.009;0.009;0.422	0.950;0.017;0.017;0.017	t|2e1.1o8|1e1.1o8|2e2.2o2|2e2.1o2	TRUE	TRUE	TRUE	4	3	0;1;1;0	2	-	230724290-230744698;230724287-230744698;230724290-230725123;230724290-230725122	230724092-230724290;230725122-230725251;230744698-230744844
63	EPHA1-AS1	gene:ENSG00000229153	ENSG00000229153:s:143112161-143112292	9.119792768622106e-06;-0.04096796448327851;9.119792768622106e-06;0.0033505628698436997;9.119792768622106e-06;9.119792768622106e-06;9.119792768622106e-06;9.119792768622106e-06;9.119792768622106e-06;9.119792768622106e-06;-0.0014967926773479898;-0.00031435857602586594;0.007941129627564075;9.119792768622106e-06;9.119792768622106e-06;9.119792768622106e-06;0.24070682789913148;-0.11643216879624531;9.119…	1.5219436381086327e-06;0.15499623255125336;1.5219436381086327e-06;0.001251831055474903;1.5219436381086327e-06;1.5219436381086327e-06;1.5219436381086327e-06;1.5219436381086327e-06;1.5219436381086327e-06;1.5219436381086327e-06;0.0001963986606693072;2.4014850599482787e-05;0.00552536390927743;1.5219436381086327e-06;1.5219436381086327e-06;1.5219436381086327e-06;0.9668728740178515;0.5602123716118844;1.…	0.9998252851144771;0.6989849394141369;0.9998252851144771;0.9658222262440184;0.9998252851144771;0.9998252851144771;0.9998252851144771;0.9998252851144771;0.9998252851144771;0.9998252851144771;0.9844360581659377;0.9965172113850669;0.9141406292230916;0.9998252851144771;0.9998252851144771;0.9998252851144771;0.005453088152430333;0.1573679682148066;0.9998252851144771	0.001;0.753;0.001;0.001;0.001;0.001;0.001;0.001;0.001;0.001;0.031;0.016;0.016;0.001;0.001;0.001;0.001;0.174;0.001	0.001;0.610;0.001;0.045;0.001;0.001;0.001;0.001;0.001;0.001;0.001;0.001;0.066;0.001;0.001;0.001;0.262;0.001;0.001	s|1e1.1o3|1e1.2o3|1e1.3o3|1e2.1o1|1e3.1o1|1e4.1o1|1e5.1o1|1e6.1o1|1e7.1o1|1e8.1o1|1e9.1o1|1e10.1o1|1e11.1o1|1e12.1o1|1e13.1o2|1e14.1o1|1e15.1o5|1e16.1o3|1e17.1o1	FALSE	TRUE	TRUE	19	18	1;0;1;1;1;1;1;1;1;1;1;1;1;0;1;1;1;1;1	7	+	143112292-143112463;143112292-143112630;143112292-143112632;143112292-143116169;143112292-143126549;143112292-143126963;143112292-143131110;143112292-143149101;143112292-143192318;143112292-143192354;143112292-143193059;143112292-143193066;143112292-143196995;143112292-143201867;143112292-143210338;143112292-143210983;143112292-143215375;143112292-143216024;143112292-143295132	143112161-143112292;143112463-143112923;143116169-nan;143126549-nan;143126963-nan;143131110-nan;143149101-nan;143192318-nan;143192354-nan;143193059-nan;143193066-nan;143196995-nan;143201867-143201923;143210338-143210572;143210983-143211122;143215375-143215610;143216024-143220542;143295132-143295142
64	RFPL3S	gene:ENSG00000205853	ENSG00000205853:s:32763677-32763701	0.00018922023080079306;0.922093901571799;-0.9277874270182054	0.0024894351905201187;0.9999952825129264;0.9999959538203991	0.9766908702074912;3.5772135430563187e-06;3.083907737955194e-06	0.024;0.024;0.952	0.030;0.939;0.030	s|1e1.1o1|1e2.1o1|1e3.1o2	FALSE	FALSE	TRUE	3	4	1;0;0	22	-	32761482-32763677;32759045-32763677;32756826-32763677	nan-32761482;32755893-32756826;32758788-32759045;32763677-32763701
65	PCK2	gene:ENSG00000100889	ENSG00000100889:t:24566101-24566346	1.7034464098664564e-06;-0.004329213304150916;1.7034464098664564e-06;-0.09715192844892005;1.7034464098664564e-06;0.3280287787297275;1.7034464098664564e-06;-0.023561878903684143;1.7034464098664564e-06;1.7034464098664564e-06;1.7034464098664564e-06	1.2033098006469478e-05;0.007931947185862924;1.2033098006469478e-05;0.34705489582995674;1.2033098006469478e-05;0.9969530099162351;1.2033098006469478e-05;0.03769144766686377;1.2033098006469478e-05;1.2033098006469478e-05;1.2033098006469478e-05	0.9992177909435546;0.8955196946765932;0.9992177909435546;0.5276389751669455;0.9992177909435546;0.0004919418628295053;0.9992177909435546;0.7698627804549341;0.9992177909435546;0.9992177909435546;0.9992177909435546	0.002;0.077;0.002;0.802;0.002;0.002;0.002;0.102;0.002;0.002;0.002	0.002;0.054;0.002;0.576;0.002;0.345;0.002;0.002;0.002;0.002;0.002	t|1e1.1o1|1e2.1o3|1e3.1o9|1e3.2o9|1e3.9o9|1e4.1o10|2e4.1o10|1e4.10o10|1e5.1o1|1e6.1o1|1e7.1o1	TRUE	TRUE	TRUE	11	8	0;0;1;0;1;0;1;1;1;1;1	14	+	24563342-24566101;24563463-24566101;24563609-24566101;24563643-24566101;24563945-24566101;24564054-24566101;24564054-24566189;24564210-24566101;24564571-24566101;24564587-24566101;24564794-24566101	24563262-24563342;24563347-24563463;24563510-24563945;24563975-24564210;24564352-24564571;24564576-24564587;24564723-24564794;24566101-24566346
66	C14orf159	gene:ENSG00000133943	ENSG00000133943:t:91623974-91624034	-0.0006132647142435991;2.4672375748331555e-05;2.4672375748331555e-05;2.4672375748331555e-05;-0.4103765648232581;0.13349902471690375;2.4672375748331555e-05;-0.002738129375803395;2.4672375748331555e-05;2.4672375748331555e-05;2.4672375748331555e-05;-0.0026477554120317923;0.23392196468681553;-0.002239314590451739;2.4672375748331555e-05	9.471148302606102e-05;8.165305159893994e-06;8.165305159893994e-06;8.165305159893994e-06;0.9879015276977628;0.5135824815420824;8.165305159893994e-06;0.014947091467268176;8.165305159893994e-06;8.165305159893994e-06;8.165305159893994e-06;0.0006814987166431677;0.92270793120688;0.020787835980947633;8.165305159893994e-06	0.9929950271512002;0.9995117505602966;0.9995117505602966;0.9995117505602966;0.00802902827549934;0.3519913143114715;0.9995117505602966;0.8752384434239209;0.9995117505602966;0.9995117505602966;0.9995117505602966;0.972259770881453;0.02146318247091494;0.8633513835133938;0.9995117505602966	0.020;0.001;0.001;0.001;0.521;0.077;0.001;0.135;0.001;0.001;0.001;0.039;0.001;0.190;0.001	0.002;0.002;0.002;0.002;0.120;0.296;0.002;0.120;0.002;0.002;0.002;0.002;0.267;0.178;0.002	t|2e1.1o4|2e2.1o5|2e3.1o1|1e4.1o10|2e4.1o10|2e5.1o6|2e6.1o11|2e6.3o11|2e6.11o11|2e7.1o1|2e8.1o3|2e9.1o1|2e10.1o5|2e11.1o2|2e12.1o1	TRUE	TRUE	TRUE	15	13	0;1;0;1;0;0;1;0;0;0;1;1;0;0;0	14	+	91527048-91623983;91527224-91623983;91574405-91623983;91580627-91623974;91580627-91623983;91580872-91623983;91581130-91623983;91581338-91623983;91581565-91623983;91591968-91623983;91595256-91623983;91605657-91623983;91611657-91623983;91614202-91623983;91615196-91623983	nan-91605657;91526677-91527048;91527176-91527224;91574330-91574405;91580357-91580627;91580714-91580872;91581014-91581565;91591883-91591968;91595090-91595256;91611565-91611934;91614122-91614202;91614574-91615196;91623974-91624034
67	ANKRD10	gene:ENSG00000088448	ENSG00000088448:t:111546082-111546549	-0.48490116659303606;-0.0014420666528055404;5.995975971669294e-05;5.995975971669294e-05;5.995975971669294e-05;0.007887750507948517;0.38801563747405704	0.993226133836809;0.009163606186625924;4.394460698493403e-05;4.394460698493403e-05;4.394460698493403e-05;0.008171379044830025;0.9206756759527357	0.004754613412790043;0.8924082956076971;0.9981503604431496;0.9981503604431496;0.9981503604431496;0.9204922652648535;0.060400240300113234	0.585;0.077;0.003;0.003;0.003;0.003;0.320	0.108;0.074;0.005;0.005;0.005;0.074;0.729	t|2e1.1o20|1e1.1o20|2e2.1o2|2e3.2o3|2e4.2o4|2e5.1o1|2e6.1o1	FALSE	TRUE	TRUE	7	7	0;1;1;1;1;1;1	13	-	111546549-111558380;111546511-111558380;111546549-111557092;111546549-111555823;111546549-111552877;111546549-111552272;111546549-111546632	111546082-111546549;111546632-111546740;111552272-111552365;111552620-111553041;111555819-111555886;111557092-111557580;111558380-111558471
68	SPOP	gene:ENSG00000121067	ENSG00000121067:t:47714121-47714171	-0.11798335045004364;-0.004246395909240746;0.2573754737232073;-0.004246395909240746;-2.049867113481049e-05;0.0006968228594968675;-2.049867113481049e-05	0.4554398995269894;0.001911087984561956;0.972062992276889;0.001911087984561956;8.877464477941421e-06;0.00012834947121629622;8.877464477941421e-06	0.41241713035137395;0.9563055906469802;0.00589230200129048;0.9563055906469802;0.9991971325605438;0.9918778572783173;0.9991971325605438	0.891;0.048;0.003;0.048;0.003;0.003;0.003	0.683;0.003;0.283;0.003;0.003;0.023;0.003	t|1e1.1o12|1e2.1o6|1e3.2o6|1e3.1o6|1e4.1o1|1e5.1o2|1e6.1o1	TRUE	FALSE	TRUE	7	7	0;0;0;1;1;0;1	17	-	47714171-47755295;47714171-47753257;47714171-47745389;47714171-47745380;47714171-47724288;47714171-47723478;47714171-47714329	47714121-47714171;47714329-47714400;47723478-47723992;47724288-47724484;47745380-47745440;47753257-47753378;47755295-47755596
69	ZFYVE28	gene:ENSG00000159733	ENSG00000159733:s:2355660-2355800	-0.00031910078948216536;-0.00031910078948216536;0.37268259612325355;-0.00031910078948216536;-0.00031910078948216536;-0.00031910078948216536;-0.261267169760046	0.0005135071011412501;0.0005135071011412501;0.9544993782087976;0.0005135071011412501;0.0005135071011412501;0.0005135071011412501;0.6894253680627971	0.9936780060588756;0.9936780060588756;0.0350678986772744;0.9936780060588756;0.9936780060588756;0.9936780060588756;0.2552121570018383	0.012;0.012;0.012;0.012;0.012;0.012;0.929	0.006;0.006;0.406;0.006;0.006;0.006;0.566	s|1e1.4o4|1e1.3o4|1e1.1o4|1e2.1o1|1e3.1o1|1e4.6o6|1e4.1o6	FALSE	TRUE	TRUE	7	5	1;1;1;1;1;1;0	4	-	2345180-2355660;2345087-2355660;2344930-2355660;2344738-2355660;2344719-2355660;2343825-2355660;2343342-2355660	nan-2344719;nan-2344738;2343049-2343825;2344809-2345180;2355660-2355800
70	PIAS3	gene:ENSG00000131788	ENSG00000131788:t:145578062-145578307	-0.3942160941195212;0.35271467631731573;0.00020494252920557528;0.00020494252920557528;0.00020494252920557528;0.00020494252920557528;0.00020494252920557528	0.9736876925444327;0.9150699171835721;0.00011626140648466388;0.00011626140648466388;0.00011626140648466388;0.00011626140648466388;0.00011626140648466388	0.019426549902489154;0.06489353738346759;0.9975219346285905;0.9975219346285905;0.9975219346285905;0.9975219346285905;0.9975219346285905	0.451;0.537;0.002;0.002;0.002;0.002;0.002	0.057;0.907;0.007;0.007;0.007;0.007;0.007	t|1e1.1o2|1e2.1o3|1e2.2o3|1e2.3o3|1e3.1o1|1e4.1o1|1e5.1o1	TRUE	FALSE	TRUE	7	6	0;0;1;1;1;1;0	1	+	145575404-145578062;145576102-145578062;145576146-145578062;145576214-145578062;145576719-145578062;145576744-145578062;145577753-145578062	nan-145576719;nan-145576744;145575233-145575404;145575989-145576214;145577652-145577753;145578062-145578307
71	RRN3P2	gene:ENSG00000103472	ENSG00000103472:t:29102061-29102159	-1.081920710640734e-06;-6.406083253721509e-05;0.012022016148397865;0.39516046460563103;-0.499521067322635;-1.081920710640734e-06	2.384090122732871e-05;0.004166979468164343;0.012388070444670001;0.9998360974004983;0.9996826602072999;2.384090122732871e-05	0.9984624812399214;0.9208382414171565;0.8786643494712264;3.5933147903382246e-05;0.00017048665648355943;0.9984624812399214	0.004;0.054;0.004;0.004;0.929;0.004	0.004;0.056;0.081;0.415;0.440;0.004	t|1e1.1o2|1e2.1o5|1e3.1o4|1e4.1o2|1e5.1o2|1e6.1o1	FALSE	FALSE	TRUE	6	7	1;1;0;1;0;1	16	+	29096089-29102061;29096597-29102061;29097596-29102061;29097952-29102061;29098724-29102061;29099852-29102061	29095960-29096089;29096538-29096597;29097178-29097596;29097859-29097952;29098655-29098724;29099730-29099852;29102061-29102159
72	ZNF680	gene:ENSG00000173041	ENSG00000173041:s:64023303-64023484	0.5619558207282597;2.070750468638344e-05;-0.6545092596570078;0.0019073522981698163;2.070750468638344e-05;0.008266474992927646	0.9990859979081798;8.14369791974276e-05;0.9999360963781663;0.021920986338157686;8.14369791974276e-05;0.009384791335284757	0.0005899470069452192;0.9971146807339225;4.069101891168714e-05;0.8640697458983551;0.9971146807339225;0.9158220144825219	0.068;0.005;0.786;0.130;0.005;0.005	0.622;0.006;0.144;0.144;0.006;0.075	s|1e1.1o1|1e2.1o1|1e3.1o2|1e4.1o2|2e5.1o9|1e5.1o9	TRUE	FALSE	TRUE	6	6	1;1;0;1;1;1	7	-	64021651-64023303;64007760-64023303;64004810-64023303;64004180-64023303;63982878-64023356;63982878-64023303	nan-64007760;63980262-63982909;64004085-64004180;64004684-64004810;64021324-64021651;64023303-64023484
73	ZBTB25	gene:ENSG00000089775	ENSG00000089775:s:64957079-64957258	-0.6399497302847676;9.454825835299457e-06;0.2135299531516007;9.454825835299457e-06;9.454825835299457e-06;9.454825835299457e-06;9.454825835299457e-06;0.4030257387568198;9.454825835299457e-06;9.454825835299457e-06	0.9999999996400154;5.258987677136448e-07;0.8841709505821147;5.258987677136448e-07;5.258987677136448e-07;5.258987677136448e-07;5.258987677136448e-07;0.9998609011504325;5.258987677136448e-07;5.258987677136448e-07	4.4708792223957516e-11;0.999876665938995;0.05069649227378763;0.999876665938995;0.999876665938995;0.999876665938995;0.999876665938995;3.1227239284638894e-05;0.999876665938995;0.999876665938995	0.879;0.001;0.053;0.001;0.001;0.001;0.001;0.062;0.001;0.001	0.254;0.002;0.280;0.002;0.002;0.002;0.002;0.453;0.002;0.002	s|1e1.14o15|1e1.13o15|1e1.10o15|1e1.7o15|1e1.2o15|1e2.3o4|1e2.1o4|1e3.1o4|1e4.1o2|1e5.1o1	FALSE	TRUE	TRUE	10	6	0;1;0;1;1;1;1;0;1;1	14	-	64954775-64957079;64954727-64957079;64953914-64957079;64953012-64957079;64947037-64957079;64930479-64957079;64930475-64957079;64916356-64957079;64889697-64957079;64867399-64957079	64867389-64867399;64889687-64889697;64915824-64916356;64930390-64930479;64944769-64954775;64957079-64957258
74	ZBTB25	gene:ENSG00000089775	ENSG00000089775:t:64915824-64916356	0.5304208086634481;-0.5248609247487774;-0.00018810387750042357;-0.00018810387750042357	0.9926461714498044;0.9914183218207957;0.00018511047649167383;0.00018511047649167383	0.0053464737720870905;0.006260373480174497;0.9947205953424616;0.9947205953424616	0.250;0.724;0.010;0.010	0.779;0.207;0.007;0.007	t|1e1.1o10|1e2.3o17|1e3.1o1|1e4.1o1	FALSE	FALSE	TRUE	4	5	0;0;1;1	14	-	64916356-64957079;64916356-64953832;64916356-64930390;64916356-64920393	64915824-64916356;64920393-nan;64930390-64930479;64944769-64954775;64957079-64957258
75	TCEAL1	gene:ENSG00000172465	ENSG00000172465:t:102884422-102884735	-0.3816670245974126;0.3688101467963892;0.0001837822055580741;0.0001837822055580741	0.972208619504403;0.9593373476947029;5.941819258080697e-05;5.941819258080697e-05	0.01925548712116687;0.028728992451495145;0.997619387619136;0.997619387619136	0.530;0.463;0.004;0.004	0.133;0.852;0.008;0.008	t|1e1.1o2|1e2.1o4|1e2.3o4|1e2.4o4	TRUE	FALSE	TRUE	4	3	0;0;1;1	X	+	102883721-102884422;102883953-102884422;102883980-102884422;102884224-102884422	102883632-102883721;102883902-102884224;102884422-102884735
76	UNKL	gene:ENSG00000059145	ENSG00000059145:t:1421520-1421612	2.119410412152138e-06;-0.13185366851976787;0.27430355566907627;-0.046696037241528855;2.119410412152138e-06;2.119410412152138e-06;2.119410412152138e-06;2.119410412152138e-06;2.119410412152138e-06;2.119410412152138e-06;2.119410412152138e-06;2.119410412152138e-06;2.119410412152138e-06;2.119410412152138e-06;2.119410412152138e-06;2.119410412152138e-06;2.119410412152138e-06;2.119410412152138e-06	7.381602799366933e-08;0.5976600612579053;0.9675613902764874;0.07268216975267325;7.381602799366933e-08;7.381602799366933e-08;7.381602799366933e-08;7.381602799366933e-08;7.381602799366933e-08;7.381602799366933e-08;7.381602799366933e-08;7.381602799366933e-08;7.381602799366933e-08;7.381602799366933e-08;7.381602799366933e-08;7.381602799366933e-08;7.381602799366933e-08;7.381602799366933e-08	0.9999672444442688;0.24738164262263185;0.015580969582276631;0.5347591638017388;0.9999672444442688;0.9999672444442688;0.9999672444442688;0.9999672444442688;0.9999672444442688;0.9999672444442688;0.9999672444442688;0.9999672444442688;0.9999672444442688;0.9999672444442688;0.9999672444442688;0.9999672444442688;0.9999672444442688;0.9999672444442688	0.001;0.266;0.633;0.100;0.001;0.001;0.001;0.001;0.001;0.001;0.001;0.001;0.001;0.001;0.001;0.001;0.001;0.001	0.001;0.084;0.904;0.001;0.001;0.001;0.001;0.001;0.001;0.001;0.001;0.001;0.001;0.001;0.001;0.001;0.001;0.001	t|2e1.1o4|2e2.1o4|2e3.1o8|1e3.1o8|2e4.1o1|2e5.1o1|2e6.1o1|2e7.1o1|2e8.5o5|2e8.4o5|2e8.2o5|1e8.2o5|2e8.1o5|2e9.2o3|2e9.1o3|2e10.1o1|2e11.1o1|2e12.1o1	TRUE	TRUE	TRUE	18	13	1;1;0;1;1;1;1;1;0;1;0;1;1;1;1;1;1;1	16	-	1421612-1442892;1421612-1440633;1421612-1435209;1421564-1435209;1421612-1432218;1421612-1431496;1421612-1431051;1421612-1429810;1421612-1429595;1421612-1429550;1421612-1429534;1421564-1429534;1421612-1429366;1421612-1428915;1421612-1428656;1421612-1426865;1421612-1424732;1421612-1424247	1421520-1421612;1424247-nan;1424732-nan;1426865-1426937;1428656-1429122;1429366-1429687;1429810-nan;1431051-nan;1431496-nan;1432218-1432334;1435209-1435422;1440633-1440695;1442892-1442977
77	LRR1	gene:ENSG00000165501	ENSG00000165501:t:50074118-50074839	1.7139697324301526e-05;1.7139697324301526e-05;1.7139697324301526e-05;1.7139697324301526e-05;1.7139697324301526e-05;0.3650350111039219;1.7139697324301526e-05;1.7139697324301526e-05;-0.35540108142227844	2.541138752818898e-05;2.541138752818898e-05;2.541138752818898e-05;2.541138752818898e-05;2.541138752818898e-05;0.991143404795413;2.541138752818898e-05;2.541138752818898e-05;0.9985191567486054	0.9987240218943643;0.9987240218943643;0.9987240218943643;0.9987240218943643;0.9987240218943643;0.005165333428987039;0.9987240218943643;0.9987240218943643;0.00038971108560403867	0.003;0.003;0.003;0.003;0.003;0.606;0.003;0.003;0.371	0.003;0.003;0.003;0.003;0.003;0.973;0.003;0.003;0.003	t|1e1.2o8|1e2.1o6|1e2.5o6|1e3.1o2|1e4.1o10|1e4.3o10|2e4.3o10|3e4.3o10|1e5.1o2	TRUE	TRUE	TRUE	9	6	1;1;1;1;1;0;1;1;1	14	+	50065921-50074118;50067415-50074118;50067741-50074118;50068367-50074118;50069181-50074118;50069186-50074118;50069186-50074671;50069186-50074674;50070336-50074118	50065415-50065921;50067070-50067741;50068260-50068367;50069088-50069186;50070270-50070336;50074118-50074839
78	C1orf159	gene:ENSG00000131591	ENSG00000131591:s:1019733-1019763	0.31811445947479483;2.642610478289842e-05;0.0566471498410176;2.642610478289842e-05;0.0038787379156597387;2.642610478289842e-05;-0.3675731226958367;-0.066027574458211	0.9898966198530619;5.211161656233218e-06;0.17456777719729677;5.211161656233218e-06;0.001640612117861919;5.211161656233218e-06;0.9706831807160271;0.2685143399980138	0.004001669570614109;0.9994682089017652;0.4976655065935339;0.9994682089017652;0.9603204254835557;0.9994682089017652;0.019102714443980373;0.4581866147566701	0.034;0.002;0.002;0.002;0.002;0.002;0.796;0.160	0.352;0.003;0.139;0.003;0.048;0.003;0.425;0.025	s|1e1.4o5|1e1.3o5|1e1.2o5|1e1.1o5|1e2.2o3|1e3.1o1|1e4.1o5|i	FALSE	TRUE	TRUE	8	5	1;1;1;0;1;1;0;0	1	-	1019466-1019733;1019451-1019733;1019396-1019733;1019391-1019733;1018821-1019733;1018405-1019733;1018367-1019733;1019732-1019733	1017198-1018367;1018389-1018405;1018674-1018821;1018822-1019466;1019467-1019732;1019733-1019763	1019467-1019732
79	CCNYL1	gene:ENSG00000163249	ENSG00000163249:s:208591566-208591600	0.7321166440043365;-0.7259520299277686;-0.00039098251332475326	0.9999933941170057;0.9999933327625368;0.00043685615373758533	3.9825833889201515e-06;3.975995476634964e-06;0.9906566214727293	0.206;0.778;0.016	0.919;0.071;0.010	s|1e1.1o1|1e2.1o4|1e3.1o5	FALSE	FALSE	TRUE	3	4	0;0;1	2	+	208591600-208598671;208591600-208602135;208591600-208606947	208591566-208591600;208598671-208598771;208602135-208602170;208606947-208607066
80	MSTO1	gene:ENSG00000125459	ENSG00000125459:s:155579979-155580128	-1.903196713310782e-05;0.30065005274606643;-0.42795801911351744;0.027662953416185146;-1.903196713310782e-05;-1.903196713310782e-05	1.7826795071202982e-05;0.994097558522426;0.9971094161247593;0.08824631438115052;1.7826795071202982e-05;1.7826795071202982e-05	0.9987036297099264;0.001178757945381709;0.0016804478404731649;0.7394686665768248;0.9987036297099264;0.9987036297099264	0.004;0.004;0.931;0.053;0.004;0.004	0.004;0.315;0.515;0.161;0.004;0.004	s|1e1.1o6|1e1.2o6|1e1.3o6|2e1.3o6|1e2.1o6|1e3.1o1	TRUE	TRUE	TRUE	6	4	1;1;0;1;1;1	1	+	155580123-155580172;155580123-155580185;155580123-155580216;155580128-155580216;155580123-155580830;155580123-155715641	155579979-155580128;155580172-155580752;155580830-155580899;155715641-nan
81	LOXL1-AS1	gene:ENSG00000261801	ENSG00000261801:s:74212179-74212211	-0.06001287765301151;0.00019291907543900167;0.00019291907543900167;0.46071541674069716;-0.11245629947902222;0.00019291907543900167;0.00019291907543900167;-0.11689937065367093	0.1941785600680216;0.00010596662554875191;0.00010596662554875191;0.9963076548459499;0.555781980270895;0.00010596662554875191;0.00010596662554875191;0.5767351657339461	0.4519229251099778;0.9978608315981797;0.9978608315981797;0.0026486919909019225;0.20506595611554967;0.9978608315981797;0.9978608315981797;0.18944686158252044	0.134;0.002;0.002;0.502;0.178;0.002;0.002;0.178	0.006;0.006;0.006;0.956;0.006;0.006;0.006;0.006	s|1e1.2o5|1e1.1o5|1e2.5o5|1e2.1o5|1e3.2o7|1e3.1o7|1e4.1o2|i	FALSE	TRUE	TRUE	8	5	0;1;1;0;0;1;1;0	15	-	74211724-74212179;74211547-74212179;74208795-74212179;74208788-74212179;74204644-74212179;74204642-74212179;74191840-74212179;74212178-74212179	74191830-74191840;74204173-74204644;74208571-74208795;74209937-74211724;74211725-74212178;74212179-74212211	74211725-74212178
82	MLLT10	gene:ENSG00000078403	ENSG00000078403:t:22002701-22002879	2.1715453350950176e-05;-0.020617831035417263;-0.5650886730956931;0.7156167441471272;2.1715453350950176e-05;2.1715453350950176e-05;2.1715453350950176e-05;2.1715453350950176e-05	0.0005293746395993006;0.052786765964884325;0.9471289333727534;0.9975078675742928;0.0005293746395993006;0.0005293746395993006;0.0005293746395993006;0.0005293746395993006	0.9934166420360518;0.8201736062152066;0.04315593648784699;0.001955190551875802;0.9934166420360518;0.9934166420360518;0.9934166420360518;0.9934166420360518	0.008;0.142;0.742;0.075;0.008;0.008;0.008;0.008	0.010;0.010;0.163;0.779;0.010;0.010;0.010;0.010	t|1e1.2o3|1e2.1o3|1e3.1o4|1e4.1o5|1e5.1o1|1e6.1o1|1e7.1o1|1e8.1o1	FALSE	FALSE	TRUE	8	9	1;0;0;0;1;1;1;1	10	+	21962848-22002701;21970305-22002701;21971186-22002701;21977467-22002701;21979890-22002701;21981721-22002701;21997586-22002701;22001269-22002701	21962279-21962848;21970261-21970305;21971154-21971186;21977420-21977467;21979837-21979890;21981597-21981721;21997517-21997586;22001159-22001269;22002701-22002879
83	FAM63A	gene:ENSG00000143409	ENSG00000143409:t:150974641-150975541	0.013660244870845951;0.42157031971435915;0.0001272235631907546;-0.4139044746028963;0.0001272235631907546;0.0001272235631907546;0.0001272235631907546;-0.055106912073260655;-0.00023498574480891016;0.0001272235631907546;0.0001272235631907546;0.0001272235631907546	0.02589821289206341;0.9506266702590043;7.199713454397128e-05;0.9993999652838956;7.199713454397128e-05;7.199713454397128e-05;7.199713454397128e-05;0.1616510611832393;9.921203828935988e-05;7.199713454397128e-05;7.199713454397128e-05;7.199713454397128e-05	0.8737644748527985;0.0379587777089644;0.9985693479431765;0.00042150246006611436;0.9985693479431765;0.9985693479431765;0.9985693479431765;0.49434564429195915;0.9948571057492324;0.9985693479431765;0.9985693479431765;0.9985693479431765	0.001;0.419;0.001;0.436;0.001;0.001;0.001;0.122;0.017;0.001;0.001;0.001	0.110;0.846;0.004;0.004;0.004;0.004;0.004;0.004;0.004;0.004;0.004;0.004	t|10e1.1o13|9e1.1o13|8e1.1o13|7e1.1o13|6e1.1o13|5e1.1o13|4e1.1o13|3e1.1o13|2e1.1o13|1e1.1o13|7e2.1o1|9e3.1o1	FALSE	TRUE	TRUE	12	4	1;0;1;1;1;1;0;0;1;1;0;1	1	-	150975541-150978788;150975444-150978788;150975186-150978788;150975182-150978788;150975120-150978788;150975005-150978788;150974876-150978788;150974799-150978788;150974787-150978788;150974779-150978788;150975182-150978577;150975444-150976358	150974641-150975541;150976358-nan;150978577-150978723;150978788-150979333
84	HIATL2	gene:ENSG00000196312	ENSG00000196312:s:99711837-99711964	0.002039250424098815;-0.16190178165357003;4.865270724558297e-06;4.865270724558297e-06;-0.01674296340918807;4.865270724558297e-06;4.865270724558297e-06;4.865270724558297e-06;4.865270724558297e-06;4.865270724558297e-06;4.865270724558297e-06;-0.29740596675089076;4.865270724558297e-06;4.865270724558297e-06;0.6231280797189134;4.865270724558297e-06;4.865270724558297e-06	0.0011372501454535832;0.6927398782044214;2.244969602635137e-05;2.244969602635137e-05;0.024917279733388212;2.244969602635137e-05;2.244969602635137e-05;2.244969602635137e-05;2.244969602635137e-05;2.244969602635137e-05;2.244969602635137e-05;0.8590112668031779;2.244969602635137e-05;2.244969602635137e-05;0.9997821167530879;2.244969602635137e-05;2.244969602635137e-05	0.9785539820605547;0.131940694041908;0.9991208143149201;0.9991208143149201;0.8361240729019115;0.9991208143149201;0.9991208143149201;0.9991208143149201;0.9991208143149201;0.9991208143149201;0.9991208143149201;0.1040766733259223;0.9991208143149201;0.9991208143149201;0.00014424956472553705;0.9991208143149201;0.9991208143149201	0.002;0.228;0.002;0.002;0.099;0.002;0.002;0.002;0.002;0.002;0.002;0.402;0.002;0.002;0.260;0.002;0.002	0.037;0.002;0.002;0.002;0.002;0.002;0.002;0.002;0.002;0.002;0.002;0.071;0.002;0.002;0.864;0.002;0.002	s|1e1.1o1|1e2.1o1|1e3.1o1|1e4.5o5|1e4.4o5|1e4.3o5|1e4.2o5|1e4.1o5|1e5.2o2|1e5.1o2|1e6.1o1|1e7.1o2|1e8.1o1|1e9.1o1|1e10.1o1|1e11.1o1|1e12.1o1	FALSE	TRUE	TRUE	17	13	0;1;1;1;1;1;1;0;1;1;1;1;1;1;1;1;1	9	-	99711202-99711837;99710370-99711837;99709540-99711837;99708687-99711837;99708638-99711837;99708634-99711837;99708518-99711837;99708503-99711837;99706367-99711837;99706364-99711837;99706014-99711837;99705436-99711837;99705423-99711837;99705372-99711837;99705034-99711837;99696197-99711837;99681108-99711837	nan-99709540;nan-99710370;99681098-99681108;99696187-99696197;99705024-99705034;99705362-99705372;99705413-99705423;99705426-99705436;99706004-99706014;99706354-99706367;99708327-99708687;99711193-99711202;99711837-99711964
85	TDRD7	gene:ENSG00000196116	ENSG00000196116:t:100193215-100193356	0.8345532823421882;-0.846215673672772;0.00017195861307231524	0.9999996294620827;0.9999992764286024;0.0009073940078597108	2.41096978188397e-07;4.778434620211769e-07;0.9858200074203369	0.015;0.970;0.015	0.843;0.137;0.020	t|1e1.1o3|1e2.1o2|1e2.2o2	TRUE	FALSE	TRUE	3	3	0;0;1	9	+	100174520-100193215;100190954-100193215;100190962-100193215	100174232-100174520;100190742-100190962;100193215-100193356

## Sheet: 8hr CD3 Donor 1
8hr CD3 AS Events - Donor 1
	X.Gene.Name	Gene.ID	LSV.ID	E.dPSI..per.LSV.junction	P..dPSI...0.10..per.LSV.junction	P..dPSI...0.05..per.LSV.junction	ND307.8hr.Unstim.E.PSI.	ND307.8hr.CD3.E.PSI.	LSV.Type	A5SS	A3SS	ES	Num..Junctions	Num..Exons	De.Novo.Junctions	chr	strand	Junctions.coords	Exons.coords	IR.coords
1	ING3	gene:ENSG00000071243	ENSG00000071243:s:120595613-120595678	0.055378265388959735;0.03355455202719778;-0.007994130523278842;-7.698486805951242e-06;0.021417553616992026;-0.21845823396587524	0.21763247505848263;0.020074561213657464;0.029839857107951055;1.5830291644913623e-07;0.03682366133012759;0.9599507579676961	0.5343648033989563;0.6586654945330198;0.8462472416907144;0.999918804104136;0.7751940605370197;0.006882085849049369	0.080;0.002;0.600;0.002;0.068;0.247	0.195;0.079;0.564;0.001;0.136;0.021	s|1e1.1o3|1e1.3o3|1e2.1o2|1e2.2o2|1e3.1o2|i	FALSE	TRUE	TRUE	6	4	0;1;0;1;1;0	7	+	120595678-120596214;120595678-120596217;120595678-120604796;120595678-120604800;120595678-120606680;120595678-120595679	120595613-120595678;120595679-120596213;120596214-120597034;120604796-120604892;120606680-120606751	120595679-120596213
2	SGSM2	gene:ENSG00000141258	ENSG00000141258:s:2268482-2268635	0.015781262583761998;-1.8957990138513286e-08;-1.8957990138513286e-08;0.005431425452519409;0.03586600679449755;-1.8957990138513286e-08;-1.8957990138513286e-08;-0.3007169427272149;-1.8957990138513286e-08;0.07030732840555441;-1.8957990138513286e-08	0.0067813435567850655;1.9316169687148386e-11;1.9316169687148386e-11;0.00025461548062360653;0.019703870308192158;1.9316169687148386e-11;1.9316169687148386e-11;0.9811951662471042;1.9316169687148386e-11;0.3024597833089127;1.9316169687148386e-11	0.8297238458642229;0.9999993619088147;0.9999993619088147;0.9444187121098282;0.6348885220601134;0.9999993619088147;0.9999993619088147;0.0071164074527106935;0.9999993619088147;0.5333163173439535;0.9999993619088147	0.039;0.001;0.001;0.001;0.001;0.001;0.001;0.509;0.001;0.446;0.001	0.078;0.001;0.001;0.049;0.080;0.001;0.001;0.218;0.001;0.566;0.001	s|2e1.1o1|2e2.1o1|2e3.1o1|2e4.1o7|2e4.2o7|2e4.3o7|1e4.4o7|2e4.4o7|1e5.1o6|2e5.1o6|2e6.2o6	TRUE	TRUE	TRUE	11	7	1;1;1;1;1;1;1;0;1;0;1	17	+	2268635-2268797;2268635-2268833;2268635-2270008;2268635-2270333;2268635-2270459;2268635-2270562;2268624-2270565;2268635-2270565;2268624-2274556;2268635-2274556;2268635-2275484	2268482-2268635;2268797-2268813;2268833-2268960;2270008-nan;2270333-2270699;2274556-2274709;2275441-2275548
3	SELO	gene:ENSG00000073169	ENSG00000073169:s:50639408-50640284	0.03154306371871688;-0.02620739333326908;0.22973295507316108;8.373382475807611e-07;-0.03197776453550164;0.003817696091380099;-0.14351115381859955	0.030245434527171326;0.017330957224325295;0.9517179985131051;3.4488961605114795e-08;0.12024350162442374;0.0004803629078394864;0.6518467030718015	0.6816867556961544;0.7340361250478733;0.015957445422112602;0.9999574491169628;0.7263220560009935;0.9609352439281854;0.187182493623824	0.001;0.080;0.050;0.001;0.637;0.001;0.226	0.090;0.002;0.283;0.002;0.518;0.046;0.057	s|1e1.1o1|1e2.1o1|1e3.1o2|1e3.2o2|1e4.1o5|2e4.1o5|1e4.5o5	TRUE	TRUE	TRUE	7	5	1;1;1;1;0;1;1	22	+	50640019-50640315;50640019-50641227;50640019-50643348;50640019-50643352;50640019-50644746;50640284-50644746;50640019-50644750	50639408-50640284;50640315-50640441;50641227-nan;50643348-50643453;50644746-50644949
4	ELF1	gene:ENSG00000120690	ENSG00000120690:t:41556119-41556418	-0.021307298549997696;-1.8040826895794804e-08;-1.8040826895794804e-08;-1.8040826895794804e-08;-1.8040826895794804e-08;-0.3959079337167362;-1.8040826895794804e-08;-1.8040826895794804e-08;-9.774729661444309e-05;0.0020481142941085146;-1.8040826895794804e-08;-1.8040826895794804e-08;-1.8040826895794804e-08;-1.8040826895794804e-08;-1.8040826895794804e-08;0.4407663564189278;-1.8040826895794804e-08	0.0493424592902249;5.168857316106843e-12;5.168857316106843e-12;5.168857316106843e-12;5.168857316106843e-12;0.999995210920387;5.168857316106843e-12;5.168857316106843e-12;2.2548931692910636e-07;3.2867270562246074e-06;5.168857316106843e-12;5.168857316106843e-12;5.168857316106843e-12;5.168857316106843e-12;5.168857316106843e-12;0.9999999922776718;5.168857316106843e-12	0.7793046492019116;0.9999998149026788;0.9999998149026788;0.9999998149026788;0.9999998149026788;2.364794948750415e-07;0.9999998149026788;0.9999998149026788;0.9987741253763077;0.9768983333709707;0.9999998149026788;0.9999998149026788;0.9999998149026788;0.9999998149026788;0.9999998149026788;9.376617743588152e-11;0.9999998149026788	0.225;0.000;0.000;0.000;0.000;0.613;0.000;0.000;0.019;0.019;0.000;0.000;0.000;0.000;0.000;0.121;0.000	0.158;0.000;0.000;0.000;0.000;0.230;0.000;0.000;0.017;0.042;0.000;0.000;0.000;0.000;0.000;0.551;0.000	t|1e1.1o10|1e2.1o1|1e3.1o1|1e4.1o1|1e5.1o1|1e6.1o10|1e7.1o2|1e8.1o1|1e9.1o1|1e10.1o1|1e11.1o1|1e12.1o1|1e13.1o1|1e14.1o1|1e15.1o1|1e16.1o1|1e17.1o1	FALSE	FALSE	TRUE	17	18	0;1;1;1;1;0;1;1;1;1;1;1;1;1;1;1;1	13	-	41556418-41634974;41556418-41634781;41556418-41626698;41556418-41601032;41556418-41594849;41556418-41593364;41556418-41591638;41556418-41588486;41556418-41588295;41556418-41587214;41556418-41580066;41556418-41572174;41556418-41571625;41556418-41567020;41556418-41557260;41556418-41556994;41556418-41556842	41556119-41556418;41556842-nan;41556994-nan;41557260-nan;41567020-41567367;41571625-nan;41572174-41572255;41580066-nan;41587214-41587330;41588295-41588485;41588486-41588561;41591638-41591919;41593364-41593568;41594849-41594954;41601032-nan;41626698-41626844;41634781-41634791;41634974-41635576
5	AMBRA1	gene:ENSG00000110497	ENSG00000110497:s:46564688-46564948	0.31371363636510086;-9.66697827213238e-06;-9.66697827213238e-06;-9.66697827213238e-06;-0.31329261828141464	0.9905379175774144;1.4250757989192368e-06;1.4250757989192368e-06;1.4250757989192368e-06;0.9935495869633514	0.003707667748439558;0.9996219006906838;0.9996219006906838;0.9996219006906838;0.0022264779388252443	0.640;0.003;0.003;0.003;0.351	0.947;0.003;0.003;0.003;0.045	s|3e1.2o6|2e1.2o6|1e1.2o6|3e1.1o6|i	TRUE	TRUE	FALSE	5	2	0;1;1;1;0	11	-	46564531-46564802;46564531-46564799;46564531-46564688;46564504-46564802;46564687-46564688	46563495-46564531;46564532-46564687;46564688-46564948	46564532-46564687
6	SBNO2	gene:ENSG00000064932	ENSG00000064932:t:1127603-1127764	-7.268490531557648e-07;-0.5586715731526137;-7.268490531557648e-07;-7.268490531557648e-07;-7.268490529266635e-07;0.5617514632618432;-7.268490531557648e-07;-7.268490531557648e-07;-7.268490531557648e-07;-7.268490531557648e-07	3.185177942524175e-09;0.9999999999963195;3.185177942524175e-09;3.185177942524175e-09;3.185177942524158e-09;0.9999999999979658;3.185177942524175e-09;3.185177942524175e-09;3.185177942524175e-09;3.185177942524175e-09	0.9999925591760749;1.887379141862766e-14;0.9999925591760749;0.9999925591760749;0.9999925591760724;1.0562941854866985e-14;0.9999925591760749;0.9999925591760749;0.9999925591760749;0.9999925591760749	0.001;0.717;0.001;0.001;0.001;0.280;0.001;0.001;0.001;0.001	0.000;0.167;0.000;0.000;0.003;0.830;0.000;0.000;0.000;0.000	t|2e1.1o6|2e2.1o3|2e3.1o1|2e4.1o1|2e5.1o1|2e6.1o3|1e6.1o3|2e7.1o1|2e8.1o1|2e9.1o1	FALSE	TRUE	TRUE	10	10	1;0;1;1;1;0;1;1;1;1	19	-	1127764-1174171;1127764-1147308;1127764-1143708;1127764-1143107;1127764-1140864;1127764-1132089;1127746-1132089;1127764-1131850;1127764-1130373;1127764-1129141	1127603-1127764;1129141-nan;1130373-nan;1131850-1131915;1132089-1132220;1140864-nan;1143107-nan;1143708-1143923;1147308-1147419;1174171-1174282
7	DGUOK-AS1	gene:ENSG00000237883	ENSG00000237883:t:74185097-74185334	-0.004114317793105806;-0.052730598487155174;0.7262439080673448;-0.000921165374749914;-0.23779356836823867;-0.05338346283910127;0.00022117654960208515;-0.010281425576980046;0.00022117654960208515;0.00022117654960208515;-0.004114317793105806	0.0022861174369007676;0.17246068342562365;0.9997778040376099;0.0005246500667076084;0.8905186618848258;0.17569757479011835;0.00022740197573762006;0.009102245243015292;0.00022740197573762006;0.00022740197573762006;0.0022861174369007676	0.9526743175253676;0.534126413751637;0.0001629419909486817;0.9853814725996131;0.0739256791898435;0.5293915983737252;0.9971505922798258;0.8904562950274979;0.9971505922798258;0.9971505922798258;0.9526743175253676	0.050;0.145;0.216;0.026;0.288;0.145;0.002;0.074;0.002;0.002;0.050	0.008;0.008;0.924;0.008;0.008;0.008;0.008;0.008;0.008;0.008;0.008	t|1e1.1o1|1e2.1o2|1e3.1o2|1e4.1o1|1e5.1o1|1e6.1o1|1e7.4o5|1e7.1o5|1e8.1o1|1e9.1o1|1e10.1o1	TRUE	FALSE	TRUE	11	11	1;1;1;1;1;1;0;0;1;1;1	2	-	74185334-74213411;74185334-74213244;74185334-74213195;74185334-74212877;74185334-74211171;74185334-74209158;74185334-74208262;74185334-74208236;74185334-74206307;74185334-74197425;74185334-74186846	74185097-74185334;74186846-nan;74197425-nan;74206307-74206373;74208236-74208568;74209158-74209168;74211171-74211181;74212877-74212887;74213195-74213205;74213244-74213254;74213411-74213421
8	AMN1	gene:ENSG00000151743	ENSG00000151743:t:31862227-31862359	-0.09991461829044378;0.5819945991137861;3.3360222944895737e-06;0.0026127136580058196;-0.45990595578150184;3.3360222944895737e-06;3.3360222944895737e-06	0.4403510542878902;0.9999977059774108;3.3274156393795413e-06;0.000713986315351945;0.9997068820324215;3.3274156393795413e-06;3.3274156393795413e-06	0.23791974742343158;8.985383309921984e-07;0.9995131344641016;0.972919175227438;0.00013854224726062014;0.9995131344641016;0.9995131344641016	0.160;0.303;0.002;0.002;0.529;0.002;0.002	0.003;0.871;0.003;0.040;0.078;0.003;0.003	t|1e1.6o8|1e1.1o8|1e2.1o1|1e3.1o4|1e4.1o3|1e5.1o2|1e6.1o1	TRUE	FALSE	TRUE	7	7	0;0;1;1;0;0;1	12	-	31862359-31881925;31862359-31881905;31862359-31881719;31862359-31872152;31862359-31867816;31862359-31867375;31862359-31863582	31862227-31862359;31863582-nan;31867375-31867565;31867816-31867885;31872152-31872290;31881719-31881729;31881905-31882108
9	PTP4A3	gene:ENSG00000184489	ENSG00000184489:t:142431488-142431710	-3.817867726961695e-06;-3.817867726961695e-06;-0.5008058137749127;-3.817867726961695e-06;-3.817867726961695e-06;-3.817867726961695e-06;-3.817867726961695e-06;-3.817867726961695e-06;-3.817867726961695e-06;-3.817867726961695e-06;-3.817867726961695e-06;-3.817867726961695e-06;-3.817867726961695e-06;-3.817867726961695e-06;0.3694667442361734;-3.817867726961695e-06;0.005789606067589479;-3.81786772696169…	3.3504117117902573e-07;3.3504117117902573e-07;0.9999861543877581;3.3504117117902573e-07;3.3504117117902573e-07;3.3504117117902573e-07;3.3504117117902573e-07;3.3504117117902573e-07;3.3504117117902573e-07;3.3504117117902573e-07;3.3504117117902573e-07;3.3504117117902573e-07;3.3504117117902573e-07;3.3504117117902573e-07;0.9975642467179219;3.3504117117902573e-07;0.0014256570125162364;3.350411711790257…	0.9999234922794361;0.9999234922794361;5.010542072803048e-06;0.9999234922794361;0.9999234922794361;0.9999234922794361;0.9999234922794361;0.9999234922794361;0.9999234922794361;0.9999234922794361;0.9999234922794361;0.9999234922794361;0.9999234922794361;0.9999234922794361;0.0010767485730671649;0.9999234922794361;0.9407965733845957;0.9999234922794361;0.9999234922794361;0.7999084569835617	0.001;0.001;0.915;0.001;0.001;0.001;0.001;0.001;0.001;0.001;0.001;0.001;0.001;0.001;0.068;0.001;0.001;0.001;0.001;0.001	0.001;0.001;0.424;0.001;0.001;0.001;0.001;0.001;0.001;0.001;0.001;0.001;0.001;0.001;0.436;0.001;0.053;0.001;0.001;0.080	t|1e1.1o1|1e2.1o1|1e3.1o10|1e3.9o10|1e3.10o10|1e4.1o1|1e5.1o1|1e6.1o1|1e7.1o1|1e8.1o1|1e9.1o1|1e10.1o1|1e11.1o1|1e12.1o1|1e13.1o2|1e14.1o1|1e15.1o1|1e16.1o1|1e17.1o1|1e18.1o1	TRUE	FALSE	TRUE	20	19	1;1;0;1;1;1;1;1;1;1;1;1;1;1;1;1;1;1;1;1	8	+	142236937-142431488;142398978-142431488;142402184-142431488;142402434-142431488;142402763-142431488;142412028-142431488;142414396-142431488;142415918-142431488;142418261-142431488;142424072-142431488;142425202-142431488;142425696-142431488;142426639-142431488;142427457-142431488;142428118-142431488;142428122-142431488;142428131-142431488;142428553-142431488;142428564-142431488;142431096-142431488	nan-142412028;nan-142414396;nan-142424072;nan-142425202;nan-142425696;nan-142426639;nan-142427457;nan-142428118;nan-142428122;nan-142428131;nan-142428553;nan-142428564;nan-142431096;142236927-142236937;142398968-142398978;142402093-142402763;142415684-142415918;142418077-142418261;142431488-142431710
10	CBY1	gene:ENSG00000100211	ENSG00000100211:t:39066772-39066994	2.1277801448501832e-07;2.1277801448501832e-07;2.1277801448501832e-07;-0.02938273865851263;2.1277801448501832e-07;2.1277801448501832e-07;-0.262640685173438;2.1277801448501832e-07;2.1277801448501832e-07;0.34503078863658904	8.581929321610548e-10;8.581929321610548e-10;8.581929321610548e-10;0.012826879525052003;8.581929321610548e-10;8.581929321610548e-10;0.9986203746129387;8.581929321610548e-10;8.581929321610548e-10;0.9999923494580789	0.9999958682741673;0.9999958682741673;0.9999958682741673;0.700572887845113;0.9999958682741673;0.9999958682741673;7.482191485119749e-05;0.9999958682741673;0.9999958682741673;2.1745745913735225e-07	0.001;0.001;0.001;0.078;0.001;0.001;0.282;0.001;0.001;0.633	0.001;0.001;0.001;0.001;0.001;0.001;0.017;0.001;0.001;0.977	t|1e1.2o13|4e1.2o13|4e2.1o9|1e3.1o4|4e3.1o4|4e4.1o5|1e4.2o5|2e4.2o5|3e4.2o5|4e4.2o5	TRUE	TRUE	TRUE	10	5	1;1;1;1;1;1;1;1;1;0	22	+	39052755-39066772;39052755-39066889;39053148-39066889;39061690-39066772;39061690-39066889;39064136-39066889;39064137-39066772;39064137-39066790;39064137-39066875;39064137-39066889	39052645-39052755;39052961-39053605;39061317-39061690;39064022-39064137;39066772-39066994
11	WDR27	gene:ENSG00000184465	ENSG00000184465:s:170058372-170058454	-1.1390620654494422e-05;0.30440865674054013;-1.1390620654494422e-05;0.0002180324295194496;-1.1390620654494422e-05;-1.1390620654494422e-05;-0.41028130723429124;0.0002180324295194496;0.0010844006340717087;0.0010844006340717087	1.222875952795406e-06;0.9032301517869387;1.222875952795406e-06;1.2215945921066174e-05;1.222875952795406e-06;1.222875952795406e-06;0.9934118214036286;1.2215945921066174e-05;9.950788613938531e-05;9.950788613938531e-05	0.9997814238563932;0.06723986555504091;0.9997814238563932;0.9974350067148046;0.9997814238563932;0.9997814238563932;0.0038504276967015194;0.9974350067148046;0.9885793657704823;0.9885793657704823	0.002;0.320;0.002;0.002;0.002;0.002;0.666;0.002;0.002;0.002	0.001;0.639;0.001;0.015;0.001;0.001;0.262;0.015;0.030;0.030	s|1e1.3o3|1e1.2o3|1e1.1o3|1e2.1o1|1e3.2o2|1e3.1o2|1e4.1o5|1e5.1o3|1e6.1o6|1e7.2o9	FALSE	TRUE	TRUE	10	8	1;1;1;1;1;1;0;1;1;1	6	-	170058201-170058372;170058142-170058372;170058097-170058372;170057703-170058372;170055507-170058372;170055364-170058372;170052104-170058372;170049371-170058372;170038756-170058372;170034621-170058372	nan-170057703;170034524-170034621;170038635-170038756;170049294-170049371;170052026-170052104;170054617-170055507;170058062-170058201;170058372-170058454
12	ARFRP1	gene:ENSG00000101246	ENSG00000101246:s:62339011-62339190	0.0175146370326625;0.18411374490864604;-0.5466252004934237;0.011863800433586046;-9.440018953116372e-06;0.04246431152741274	0.06760888306961482;0.8014207450683251;0.9993581026936943;0.012012702808064877;2.5493827820850512e-05;0.11215795935402777	0.799397266192627;0.0748519638767803;0.0004038260138463645;0.8800057634493418;0.9984043726975842;0.6119158050325878	0.191;0.004;0.789;0.004;0.004;0.004	0.286;0.235;0.261;0.081;0.004;0.132	s|3e1.8o13|2e1.8o13|3e1.1o13|2e1.1o13|1e1.1o13|3e2.1o4	TRUE	TRUE	TRUE	6	3	1;1;0;1;1;1	20	-	62338449-62339162;62338449-62339013;62338444-62339162;62338444-62339013;62338444-62339011;62338090-62339162	62338003-62338161;62338351-62339010;62339011-62339190
13	ATG9A	gene:ENSG00000198925	ENSG00000198925:s:220094257-220094439	0.11397773118972519;-0.3962105338772693;-4.1090381462283627e-07;0.16491083877357884;-4.1090381462283627e-07;-4.1090381462283627e-07	0.46676539017466195;0.9980420759383836;5.384932845368429e-08;0.6933810128675274;5.384932845368429e-08;5.384932845368429e-08	0.3945645238178467;0.0008588605554666895;0.9999422338603621;0.1922978355638321;0.9999422338603621;0.9999422338603621	0.261;0.587;0.002;0.151;0.002;0.002	0.451;0.193;0.002;0.354;0.002;0.002	s|1e1.1o4|1e2.3o5|1e2.1o5|1e3.1o5|1e4.1o4|1e5.5o8	FALSE	TRUE	TRUE	6	6	0;0;0;0;0;0	2	-	220093896-220094257;220093207-220094257;220093204-220094257;220092775-220094257;220092535-220094257;220090294-220094257	220090133-220090294;220092492-220092535;220092644-220092801;220093146-220093415;220093732-220094090;220094257-220094439
14	RAD51D	gene:ENSG00000185379	ENSG00000185379:s:33446130-33446191	0.4686268498398846;-0.00010545200757342025;-0.007810187511301379;-0.25771733384890183;-0.007810187511301379;-0.00010545200757342025;-0.00010545200757342025	0.9958024821722976;3.0297892095023725e-05;0.007185440355409125;0.7758268565914673;0.007185440355409125;3.0297892095023725e-05;3.0297892095023725e-05	0.002632359160753191;0.9987166514436201;0.9217824481054263;0.16692538244197963;0.9217824481054263;0.9987166514436201;0.9987166514436201	0.317;0.005;0.069;0.522;0.069;0.005;0.005	0.783;0.002;0.002;0.211;0.002;0.002;0.002	s|1e1.1o1|1e2.1o2|1e3.2o5|1e4.4o9|1e4.1o9|1e5.1o4|1e6.1o6	FALSE	TRUE	TRUE	7	7	0;0;1;0;1;1;1	17	-	33445638-33446130;33444056-33446130;33434141-33446130;33433500-33446130;33433496-33446130;33430563-33446130;33428384-33446130	33428220-33428400;33430473-33430563;33433405-33433500;33434007-33434141;33443878-33444056;33445520-33445638;33446130-33446191
15	RNF111	gene:ENSG00000157450	ENSG00000157450:s:59373135-59373483	-0.3017146209584341;0.3025920817280113;-1.496838292629651e-05	0.9739217411114061;0.9740813802067891;3.0564336248706866e-07	0.01275746405888889;0.012849504601581399;0.9998123026938484	0.485;0.511;0.004	0.185;0.809;0.003	s|1e1.1o2|1e1.2o2|1e2.1o3	FALSE	TRUE	TRUE	3	3	0;0;1	15	+	59373483-59376301;59373483-59376328;59373483-59377858	59373135-59373483;59376301-59376453;59377858-59377984
16	KIAA1430	gene:ENSG00000164323	ENSG00000164323:t:186111297-186112366	-2.57947633364591e-05;-0.32361588434093236;-2.57947633364591e-05;0.33135184093995873;-2.57947633364591e-05;-2.57947633364591e-05	2.353712399377644e-06;0.9884079274843949;2.353712399377644e-06;0.9939628163373933;2.353712399377644e-06;2.353712399377644e-06	0.9996139024676209;0.005913002681355639;0.9996139024676209;0.002769272095832527;0.9996139024676209;0.9996139024676209	0.003;0.928;0.003;0.060;0.003;0.003	0.002;0.613;0.002;0.385;0.002;0.002	t|2e1.1o1|2e2.5o6|1e2.5o6|2e2.3o6|2e2.2o6|2e2.1o6	TRUE	TRUE	TRUE	6	3	0;0;1;0;1;1	4	-	186112366-186128889;186112366-186125052;186112364-186125052;186112366-186124939;186112366-186124840;186112366-186124626	186111297-186112366;186124626-186125182;186128889-186128945
17	KIAA1430	gene:ENSG00000164323	ENSG00000164323:s:186124626-186125182	-0.32644013919148485;0.3335926848812683;-2.6852383175216335e-05;-2.6852383175216335e-05;-2.6852383175216335e-05;-2.6852383175216335e-05	0.9882867211721708;0.9937467181802528;2.643289796219274e-06;2.643289796219274e-06;2.643289796219274e-06;2.643289796219274e-06	0.005912401230419251;0.0028901637614372885;0.9995876517924306;0.9995876517924306;0.9995876517924306;0.9995876517924306	0.928;0.060;0.003;0.003;0.003;0.003	0.601;0.389;0.002;0.002;0.002;0.002	s|4e1.2o6|3e1.2o6|2e1.2o6|1e1.2o6|4e1.1o6|3e2.1o6	TRUE	TRUE	TRUE	6	3	0;0;1;1;1;1	4	-	186112366-186125052;186112366-186124939;186112366-186124840;186112366-186124626;186112364-186125052;186097205-186124939	186096940-186097205;186111297-186112366;186124626-186125182
18	SDCCAG3	gene:ENSG00000165689	ENSG00000165689:s:139304187-139304720	-0.25443948038468894;0.0016669867398368284;-0.00019446184444793703;0.41802856236329966;-0.0260135955541148;-0.00019446184444793703	0.7081982938705071;0.00039756875914679664;8.334616136478732e-05;0.9563880208065447;0.07921440352760112;8.334616136478732e-05	0.23052299904560558;0.9786409459072581;0.9976528587477389;0.03259447243841064;0.7646548363531849;0.9976528587477389	0.607;0.007;0.007;0.207;0.167;0.007	0.275;0.036;0.003;0.636;0.052;0.003	s|3e1.1o4|2e1.1o4|4e2.2o10|3e2.2o10|2e2.2o10|1e2.2o10	TRUE	FALSE	TRUE	6	3	0;1;1;0;0;1	9	-	139303519-139304542;139303519-139304326;139302390-139304647;139302390-139304542;139302390-139304326;139302390-139304187	139302278-139302390;139303451-139303519;139304187-139304720
19	TMEM185A	gene:ENSG00000155984	ENSG00000155984:s:148713226-148713568	7.438979345888897e-07;0.15858143252848358;7.438979345888897e-07;7.438979345888897e-07;-0.3098817647218305;0.035070291284810096;7.438979345888897e-07;7.438979345888897e-07;6.221123437110203e-05	8.308261028508232e-09;0.6843169892809238;8.308261028508232e-09;8.308261028508232e-09;0.9961597236711629;0.03649009650818764;8.308261028508232e-09;8.308261028508232e-09;7.542153208892609e-07	0.9999839690911209;0.19709569614651257;0.9999839690911209;0.9999839690911209;0.0010499465963078602;0.6464422429631324;0.9999839690911209;0.9999839690911209;0.9993547766582107	0.001;0.635;0.001;0.001;0.357;0.001;0.001;0.001;0.001	0.001;0.838;0.001;0.001;0.051;0.092;0.001;0.001;0.011	s|2e1.2o3|1e1.2o3|1e1.1o3|2e2.4o6|1e2.4o6|1e2.2o6|1e3.3o9|1e3.1o9|1e4.1o8	TRUE	TRUE	TRUE	9	5	1;0;1;1;0;1;1;1;1	X	-	148693146-148713334;148693146-148713226;148693073-148713226;148690521-148713334;148690521-148713226;148690516-148713226;148685736-148713226;148685732-148713226;148682143-148713226	148681967-148682162;148685375-148685736;148690314-148690521;148692970-148693146;148713226-148713568
20	CBWD3	gene:ENSG00000196873	ENSG00000196873:t:70889798-70889991	0.4480062291184636;-0.19660393091727116;-6.057019381821468e-06;-6.057019381821468e-06;-6.057019381821468e-06;-6.057019381821468e-06;-6.057019381821468e-06;-6.057019381821468e-06;-6.057019381821468e-06;-0.06657586762660161	0.9706467231452958;0.653374772175258;4.9079438913412785e-05;4.9079438913412785e-05;4.9079438913412785e-05;4.9079438913412785e-05;4.9079438913412785e-05;4.9079438913412785e-05;4.9079438913412785e-05;0.2637065430928349	0.021815871336336962;0.2634163937074948;0.998270265497525;0.998270265497525;0.998270265497525;0.998270265497525;0.998270265497525;0.998270265497525;0.998270265497525;0.5509838812033984	0.417;0.348;0.003;0.003;0.003;0.003;0.003;0.003;0.003;0.210	0.866;0.072;0.003;0.003;0.003;0.003;0.003;0.003;0.003;0.038	t|1e1.1o2|1e2.1o6|1e2.3o6|1e2.4o6|1e2.5o6|1e2.6o6|1e3.1o1|1e4.1o1|1e5.1o1|1e6.1o1	TRUE	FALSE	TRUE	10	7	0;1;1;1;1;1;1;1;1;1	9	+	70883894-70889798;70884638-70889798;70884812-70889798;70885263-70889798;70885271-70889798;70885306-70889798;70887568-70889798;70888047-70889798;70888113-70889798;70888898-70889798	nan-70887568;nan-70888047;nan-70888113;nan-70888898;70883850-70883894;70884516-70885306;70889798-70889991
21	EXOC2	gene:ENSG00000112685	ENSG00000112685:s:689139-689212	0.0013665791596443836;0.6258274578131281;-0.00013023092254555458;-0.00013023092254555458;-0.00013023092254555458;-0.00013023092254555458;-0.6390158295565338	0.000659812516186968;0.9995517644983004;0.0001029832937281437;0.0001029832937281437;0.0001029832937281437;0.0001029832937281437;0.9997204044971014	0.9819492559015877;0.00030793771845310803;0.9971832338957666;0.9971832338957666;0.9971832338957666;0.9971832338957666;0.0001875901893425569	0.006;0.180;0.006;0.006;0.006;0.006;0.789	0.031;0.798;0.004;0.004;0.004;0.004;0.164	s|1e1.1o1|1e2.1o2|1e3.1o1|1e4.1o1|1e5.1o5|1e6.1o3|1e7.1o5	FALSE	FALSE	TRUE	7	8	1;1;1;1;0;1;1	6	-	683222-689139;679514-689139;674302-689139;670131-689139;657250-689139;647666-689139;637861-689139	nan-670131;nan-674302;nan-679514;637701-637861;647501-647666;657163-657250;683146-683222;689139-689212
22	MIB2	gene:ENSG00000197530	ENSG00000197530:t:1551654-1552117	-0.00581218777820582;-2.928473166196969e-07;0.2405919784348421;-0.18457217873206305;-2.928473166196969e-07	0.02291475745390132;1.8510779025435974e-08;0.9948499325283218;0.7023600299381239;1.8510779025435974e-08	0.860099697021472;0.9999632025333823;0.00029835586823821015;0.20602808919886584;0.9999632025333823	0.274;0.002;0.011;0.713;0.002	0.246;0.002;0.263;0.483;0.002	t|3e1.1o2|3e2.1o4|3e2.2o4|3e2.3o4|3e2.4o4	TRUE	FALSE	TRUE	5	3	0;1;1;0;1	1	+	1551013-1551888;1551370-1551888;1551462-1551888;1551480-1551888;1551501-1551888	1550795-1551013;1551285-1551501;1551654-1552117
23	PRIMPOL	gene:ENSG00000164306	ENSG00000164306:s:185599386-185599548	6.341304310076002e-06;6.341304310076002e-06;6.341304310076002e-06;0.3798756661645119;-0.11530975314177949;-0.010180894726128306;-0.05760533951819554;6.341304310076002e-06;6.341304310076002e-06	1.147663408876842e-05;1.147663408876842e-05;1.147663408876842e-05;0.997189326988397;0.5075011292044265;0.008145650147211815;0.17919687666929957;1.147663408876842e-05;1.147663408876842e-05	0.9991750209025352;0.9991750209025352;0.9991750209025352;0.0014558940914330936;0.226843559148027;0.896771009199198;0.49595162875769305;0.9991750209025352;0.9991750209025352	0.003;0.003;0.003;0.604;0.180;0.071;0.139;0.003;0.003	0.003;0.003;0.003;0.978;0.003;0.003;0.003;0.003;0.003	s|1e1.1o1|1e2.1o1|1e3.1o1|1e4.1o7|1e5.1o8|1e5.5o8|1e6.1o5|1e7.2o3|1e8.1o8	FALSE	TRUE	TRUE	9	9	1;1;1;0;0;1;1;1;1	4	+	185599548-185599707;185599548-185601369;185599548-185601939;185599548-185603402;185599548-185606563;185599548-185606566;185599548-185606730;185599548-185612470;185599548-185612653	185599386-185599548;185599707-185599959;185601369-185601484;185601939-185602169;185603402-185603490;185606563-185606652;185606730-185606838;185612387-185612508;185612653-185612735
24	RICTOR	gene:ENSG00000164327	ENSG00000164327:s:38949814-38950837	-0.0004894791108475111;0.30672714951358265;-0.3187627677058553;0.001857320302703042	0.0003372651516258381;0.9688743369537265;0.9239240813305555;0.0008638646016963188	0.9942775903992532;0.02261623834120472;0.05805954713505901;0.9701779949924327	0.013;0.013;0.961;0.013	0.004;0.341;0.617;0.039	s|1e1.2o2|1e1.1o2|1e2.3o5|1e2.1o5	FALSE	TRUE	TRUE	4	3	1;0;0;1	5	-	38949684-38949814;38949529-38949814;38947543-38949814;38947454-38949814	38947366-38947543;38949458-38949684;38949814-38950837
25	BTN2A2	gene:ENSG00000124508	ENSG00000124508:s:26383324-26383409	0.2896122620076095;0.060249502776502595;-0.4340733381102709	0.9857824100805825;0.21221140444148118;0.9994685980896423	0.00759650540207587;0.4699060024053656;0.0003176308158935326	0.013;0.013;0.975	0.314;0.144;0.539	s|1e1.4o9|1e2.1o8|i	FALSE	FALSE	TRUE	3	3	0;0;0	6	+	26383409-26384020;26383409-26388241;26383409-26383410	26383324-26383409;26383410-26383435;26383661-26384143;26388241-26388522	26383410-26383435
26	LSMD1	gene:ENSG00000183011	ENSG00000183011:s:7786553-7786653	5.7751372463778204e-08;-0.11243988432581074;5.7751372463778204e-08;-0.008389491250321004;-0.05551214482540264;5.7751372463778204e-08;5.7751372463778204e-08;-0.0024885953551578013;5.7751372463778204e-08;5.7751372463778204e-08;5.7751372463778204e-08;5.7751372463778204e-08;-0.008947813108615027;0.41582110291083985;5.7751372463778204e-08	3.669704247634256e-07;0.5407280607595355;3.669704247634256e-07;0.015530272202070417;0.14616535150143625;3.669704247634256e-07;3.669704247634256e-07;0.001003480727781211;3.669704247634256e-07;3.669704247634256e-07;3.669704247634256e-07;3.669704247634256e-07;0.0035527529772601436;0.9990758419487641;3.669704247634256e-07	0.9998969974509101;0.15547901568084577;0.9998969974509101;0.868798202310971;0.47680050896561776;0.9998969974509101;0.9998969974509101;0.9484803577736433;0.9998969974509101;0.9998969974509101;0.9998969974509101;0.9998969974509101;0.908796905757786;0.0004199008326977017;0.9998969974509101	0.001;0.168;0.001;0.138;0.122;0.001;0.001;0.046;0.001;0.001;0.001;0.001;0.062;0.456;0.001	0.001;0.001;0.001;0.093;0.001;0.001;0.001;0.032;0.001;0.001;0.001;0.001;0.001;0.864;0.001	s|1e1.1o1|1e2.1o1|1e3.1o1|1e4.1o1|1e5.1o1|1e6.1o1|1e7.1o1|1e8.1o1|1e9.1o2|1e10.1o1|1e11.3o3|1e11.1o3|2e12.1o13|1e12.1o13|1e13.1o4	TRUE	TRUE	TRUE	15	14	1;1;1;1;1;1;1;0;1;1;1;1;1;1;1	17	-	7782016-7786553;7778951-7786553;7778511-7786553;7775103-7786553;7774203-7786553;7773576-7786553;7770943-7786553;7769876-7786553;7767484-7786553;7763383-7786553;7762149-7786553;7761814-7786553;7760516-7786596;7760516-7786553;7760161-7786553	nan-7763383;nan-7770943;nan-7773576;nan-7774203;nan-7775103;nan-7778511;nan-7778951;nan-7782016;7760003-7760161;7760278-7760581;7761567-7762149;7767311-7767484;7769627-7769876;7786553-7786653
27	ST3GAL3	gene:ENSG00000126091	ENSG00000126091:s:44365151-44365399	1.3492339714960995e-05;0.3071752992898541;1.3492339714960995e-05;-0.00937781818776012;1.3492339714960995e-05;1.3492339714960995e-05;1.3492339714960995e-05;1.3492339714960995e-05;1.3492339714960995e-05;-0.15836065302221977;1.3492339714960995e-05;-0.0026068534573298126	9.817731046523514e-06;0.9920567377905447;9.817731046523514e-06;0.007200805552260656;9.817731046523514e-06;9.817731046523514e-06;9.817731046523514e-06;9.817731046523514e-06;9.817731046523514e-06;0.543015177810569;9.817731046523514e-06;0.0061283490151683466	0.9993581540816155;0.001351092412818799;0.9993581540816155;0.9048720848068702;0.9993581540816155;0.9993581540816155;0.9993581540816155;0.9993581540816155;0.9993581540816155;0.35459645094535397;0.9993581540816155;0.9048579897768992	0.002;0.002;0.002;0.065;0.002;0.002;0.002;0.002;0.002;0.854;0.002;0.065	0.002;0.331;0.002;0.002;0.002;0.002;0.002;0.002;0.002;0.599;0.002;0.058	s|1e1.1o2|1e1.2o2|1e2.1o1|1e3.1o1|1e4.1o1|1e5.1o1|1e6.1o1|1e7.1o12|1e7.2o12|1e7.3o12|1e7.12o12|1e8.2o11	FALSE	TRUE	TRUE	12	9	1;1;1;1;1;1;1;1;1;0;0;0	1	+	44365399-44366023;44365399-44366421;44365399-44375051;44365399-44377547;44365399-44381873;44365399-44382280;44365399-44382300;44365399-44385604;44365399-44386053;44365399-44386076;44365399-44386166;44365399-44395804	44365151-44365399;44366023-44366505;44375051-nan;44377547-nan;44381873-nan;44382280-nan;44382300-nan;44385604-44386222;44395691-44396831
28	ST3GAL3	gene:ENSG00000126091	ENSG00000126091:s:44364840-44364961	-1.0216680150152874e-05;-0.10287738752536367;-1.0216680150152874e-05;0.2669454554752834;-0.036773773767674565;-1.0216680150152874e-05;-1.0216680150152874e-05;-1.0216680150152874e-05;-1.0216680150152874e-05	1.130851309893113e-06;0.46882900561186147;1.130851309893113e-06;0.9640234315911367;0.06555344382954306;1.130851309893113e-06;1.130851309893113e-06;1.130851309893113e-06;1.130851309893113e-06	0.9997730629998952;0.30194751193449165;0.9997730629998952;0.014869297949855014;0.6409508021315983;0.9997730629998952;0.9997730629998952;0.9997730629998952;0.9997730629998952	0.002;0.185;0.002;0.690;0.108;0.002;0.002;0.002;0.002	0.002;0.030;0.002;0.960;0.002;0.002;0.002;0.002;0.002	s|1e1.1o6|1e1.2o6|2e1.2o6|1e1.4o6|2e1.4o6|1e2.3o12|2e2.3o12|1e3.2o11|2e3.2o11	TRUE	TRUE	TRUE	9	4	1;1;1;0;1;0;1;0;0	1	+	44364935-44365151;44364935-44365181;44364961-44365181;44364935-44365213;44364961-44365213;44364935-44386076;44364961-44386076;44364935-44395804;44364961-44395804	44364840-44364961;44365151-44365399;44385604-44386222;44395691-44396831
29	WARS	gene:ENSG00000140105	ENSG00000140105:t:100835424-100835654	-2.185692567275857e-07;-0.40036331488447763;-2.185692567275857e-07;-0.003129468905401519;0.19035432156715576;-1.2624808641238768e-07;-2.185692567275857e-07;-2.185692567275857e-07;0.18112379455957914;-2.185692567275857e-07;-2.185692567275857e-07;-2.1812755023209255e-07;-2.185692567275857e-07;-2.185692567275857e-07;-2.185692567275857e-07;-2.185692567275857e-07	5.554585767284913e-10;0.9999739898174018;5.554585767284913e-10;0.00019107162630446718;0.9292735639987408;5.554581219205792e-10;5.554585767284913e-10;5.554585767284913e-10;0.8244879974482332;5.554585767284913e-10;5.554585767284913e-10;5.554585711793536e-10;5.554585767284913e-10;5.554585767284913e-10;5.554585767284913e-10;5.554585767284913e-10	0.9999977624479987;2.83987574412059e-06;0.9999977624479987;0.9658907525161992;0.020666365962428667;0.99999681731856;0.9999977624479987;0.9999977624479987;0.0879868428351527;0.9999977624479987;0.9999977624479987;0.99999775792607;0.9999977624479987;0.9999977624479987;0.9999977624479987;0.9999977624479987	0.001;0.679;0.001;0.043;0.068;0.001;0.001;0.001;0.200;0.001;0.001;0.001;0.001;0.001;0.001;0.001	0.000;0.289;0.000;0.029;0.265;0.014;0.000;0.000;0.397;0.000;0.000;0.007;0.000;0.000;0.000;0.000	t|4e1.1o15|3e1.1o15|2e1.1o15|3e2.1o10|3e3.1o13|2e3.1o13|3e4.1o2|3e5.7o7|3e5.1o7|2e5.1o7|1e5.1o7|3e6.1o3|2e6.1o3|3e7.1o1|3e8.1o1|3e9.1o1	TRUE	TRUE	TRUE	16	10	1;0;1;1;0;1;0;1;0;1;1;0;1;1;1;1	14	-	100835654-100842597;100835595-100842597;100835558-100842597;100835595-100841848;100835595-100841620;100835558-100841620;100835595-100841113;100835595-100840496;100835595-100840473;100835558-100840473;100835541-100840473;100835595-100840317;100835558-100840317;100835595-100837947;100835595-100837071;100835595-100836448	100835424-100835654;100836448-nan;100837071-100837106;100837947-nan;100840317-100840401;100840473-100840602;100841113-100841286;100841620-100841812;100841848-100842588;100842597-100843142
30	GPR107	gene:ENSG00000148358	ENSG00000148358:t:132887194-132887243	0.44016569800195865;-0.3931818628141311;-7.970978988879733e-05;-0.0027061546168119927;-7.970978988879733e-05	0.9627691511448856;0.9315099250684067;8.929906498386084e-05;0.0017219181206740144;8.929906498386084e-05	0.0277327602502601;0.05129192189875853;0.9967010016731926;0.970255025631289;0.9967010016731926	0.390;0.555;0.007;0.041;0.007	0.829;0.149;0.006;0.006;0.006	t|1e1.1o6|1e2.1o6|1e3.1o1|1e4.1o1|1e5.1o1	FALSE	FALSE	TRUE	5	6	0;0;0;1;1	9	+	132869818-132887194;132872705-132887194;132876942-132887194;132884985-132887194;132885645-132887194	132869775-132869818;132872593-132872705;132876856-132876942;132884904-132884985;132885509-132885645;132887194-132887243
31	ZNF746	gene:ENSG00000181220	ENSG00000181220:s:149191295-149191594	-0.3235971723154889;0.3279397033809666;-2.1241660857325794e-05	0.9634364396706929;0.9657241459279761;9.470313740027596e-07	0.022126995436165697;0.020680956201120808;0.999634331402479	0.608;0.382;0.005	0.288;0.708;0.004	s|1e1.3o3|1e1.1o3|1e2.1o4	FALSE	TRUE	TRUE	3	3	1;0;1	7	-	149191206-149191295;149191161-149191295;149190063-149191295	149189950-149190063;149191080-149191206;149191295-149191594
32	SLC43A1	gene:ENSG00000149150	ENSG00000149150:t:57281431-57281615	-0.39406382039695287;0.015296433177656306;-1.0938270894795264e-05;-1.0938270894795264e-05;0.3140711091285139;1.4830871154151654e-05;-1.0938270894795264e-05;-1.0938270894795264e-05;-1.0938270894795264e-05	0.9973556838400742;0.005716726120937478;4.84594305536584e-07;4.84594305536584e-07;0.9500498635993931;6.514730044991827e-07;4.84594305536584e-07;4.84594305536584e-07;4.84594305536584e-07	0.0013020213032616246;0.8438971762306112;0.9998792356971682;0.9998792356971682;0.03222892431144966;0.9996155426449791;0.9998792356971682;0.9998792356971682;0.9998792356971682	0.572;0.002;0.002;0.002;0.414;0.002;0.002;0.002;0.002	0.183;0.066;0.001;0.001;0.741;0.009;0.001;0.001;0.001	t|1e1.1o2|1e2.1o1|1e3.5o5|2e3.3o5|1e3.3o5|1e3.2o5|1e3.1o5|1e4.2o2|1e4.1o2	TRUE	TRUE	TRUE	9	5	0;0;1;1;0;1;1;1;0	11	-	57281597-57282917;57281597-57282573;57281597-57282285;57281615-57282254;57281597-57282254;57281597-57282161;57281597-57282090;57281597-57282055;57281597-57281881	57281431-57281615;57281881-57282088;57282090-57282358;57282573-57282674;57282917-57283259
33	SFPQ	gene:ENSG00000116560	ENSG00000116560:s:35652548-35652723	7.069486125061922e-16;7.771561172376096e-16;7.771561172376096e-16;7.771561172376096e-16;7.771561172376096e-16;0.2817138347719531;7.771561172376096e-16;-0.2831794653374471	1.5985594605878947e-18;1.5985594605878825e-18;1.5985594605878825e-18;1.5985594605878825e-18;1.5985594605878825e-18;0.9718328789912881;1.5985594605878825e-18;0.9748541025059996	0.9999999999999993;1.0;1.0;1.0;1.0;0.0015493942477697472;1.0;0.0010472729320090135	0.005;0.000;0.000;0.000;0.000;0.530;0.000;0.464	0.002;0.000;0.000;0.000;0.000;0.798;0.004;0.196	s|2e1.1o1|2e2.8o8|2e2.7o8|2e2.6o8|2e2.5o8|2e2.1o8|1e2.1o8|2e3.1o1	TRUE	TRUE	TRUE	8	4	1;1;1;1;1;0;1;1	1	-	35651052-35652602;35650445-35652602;35650326-35652602;35650276-35652602;35650237-35652602;35650194-35652602;35650194-35652548;35643637-35652602	35643627-35643637;35648533-35650445;35650644-35651052;35652548-35652723
34	RELL2	gene:ENSG00000164620	ENSG00000164620:s:141016517-141017418	5.6502687324431604e-06;5.6502687324431604e-06;5.6502687324431604e-06;-0.32460673511227367;5.6502687324431604e-06;0.0018134230695762968;5.6502687324431604e-06;5.6502687324431604e-06;5.6502687324431604e-06;5.6502687324431604e-06;5.6502687324431604e-06;5.6502687324431604e-06;0.0018134230695762968;5.6502687324431604e-06;-0.019131817862044737;0.31589095229506403	3.361027707050393e-07;3.361027707050393e-07;3.361027707050393e-07;0.9879268106286839;3.361027707050393e-07;0.00032599921132463866;3.361027707050393e-07;3.361027707050393e-07;3.361027707050393e-07;3.361027707050393e-07;3.361027707050393e-07;3.361027707050393e-07;0.00032599921132463866;3.361027707050393e-07;0.009221865467953321;0.9589309575343732	0.9999258560672297;0.9999258560672297;0.9999258560672297;0.005879510702643254;0.9999258560672297;0.9814599433624704;0.9999258560672297;0.9999258560672297;0.9999258560672297;0.9999258560672297;0.9999258560672297;0.9999258560672297;0.9814599433624704;0.9999258560672297;0.8052076608173465;0.025126171144272458	0.001;0.001;0.001;0.396;0.001;0.001;0.001;0.001;0.001;0.001;0.001;0.001;0.001;0.001;0.074;0.526	0.001;0.001;0.001;0.068;0.001;0.034;0.001;0.001;0.001;0.001;0.001;0.001;0.034;0.001;0.001;0.851	s|3e1.1o11|2e1.3o11|3e1.3o11|2e1.5o11|3e1.5o11|4e1.5o11|5e1.5o11|6e1.5o11|7e1.5o11|2e1.11o11|2e2.1o1|1e3.1o7|2e3.1o7|3e3.1o7|4e3.1o7|i	TRUE	TRUE	TRUE	16	4	1;1;1;0;1;1;1;1;1;1;1;1;1;0;1;0	5	+	141017315-141017489;141017308-141017698;141017315-141017698;141017308-141017737;141017315-141017737;141017324-141017737;141017327-141017737;141017333-141017737;141017418-141017737;141017308-141017887;141017308-141018053;141016750-141018362;141017308-141018362;141017315-141018362;141017324-141018362;141017418-141017419	141016517-141017418;141017419-141017488;141017489-141017980;141018053-141018254;141018362-141018427	141017419-141017488
35	CASP8	gene:ENSG00000064012	ENSG00000064012:s:202098739-202098835	-6.055147812210858e-07;-6.055147812210858e-07;0.2696410555871236;-6.055147812210858e-07;-6.055147812210858e-07;-0.08245018231190042;-6.055147812210858e-07;-0.07132910871053602;-6.055147812210858e-07;-6.055147812210858e-07	2.6837685246510316e-09;2.6837685246510316e-09;0.9869459020689473;2.6837685246510316e-09;2.6837685246510316e-09;0.34799819442133717;2.6837685246510316e-09;0.2855888115884408;2.6837685246510316e-09;2.6837685246510316e-09	0.9999935351794572;0.9999935351794572;0.004232382025581342;0.9999935351794572;0.9999935351794572;0.4826345557350854;0.9999935351794572;0.41871290153620855;0.9999935351794572;0.9999935351794572	0.001;0.001;0.111;0.001;0.001;0.703;0.001;0.180;0.001;0.001	0.001;0.001;0.372;0.001;0.001;0.559;0.001;0.063;0.001;0.001	s|1e1.1o1|1e2.1o1|1e3.1o1|1e4.1o1|1e5.1o1|1e6.1o24|1e6.14o24|1e6.16o24|1e6.23o24|1e7.1o9	FALSE	TRUE	TRUE	10	8	1;1;1;1;1;0;1;0;1;0	2	+	202098835-202101839;202098835-202102151;202098835-202104993;202098835-202105004;202098835-202114903;202098835-202131184;202098835-202131187;202098835-202131210;202098835-202131348;202098835-202136239	202098739-202098835;202101839-nan;202102151-nan;202104993-nan;202105004-nan;202114903-202114966;202131184-202131514;202136239-202136344
36	EVA1C	gene:ENSG00000166979	ENSG00000166979:t:33829905-33830028	0.00040838920967685704;-0.00029341020702239226;-0.00029341020702239226;0.38874364056228056;-0.3594881255522282;-0.00029341020702239226	0.0003013354007814379;0.00019106963407330873;0.00019106963407330873;0.9725961597194417;0.9817384739628472;0.00019106963407330873	0.9891757822607656;0.9963766095463468;0.9963766095463468;0.015578774273243825;0.005657277841421671;0.9963766095463468	0.009;0.009;0.009;0.584;0.377;0.009	0.022;0.003;0.003;0.965;0.003;0.003	t|1e1.3o10|2e1.3o10|1e2.1o6|1e3.1o4|2e3.1o4|1e4.1o1	FALSE	TRUE	TRUE	6	5	1;1;1;0;1;1	21	+	33785321-33829905;33785321-33829908;33800992-33829905;33825816-33829905;33825816-33829908;33828343-33829905	33784689-33785321;33800371-33800992;33825620-33825816;33828246-33828343;33829905-33830028
37	ZNF207	gene:ENSG00000010244	ENSG00000010244:s:30696618-30697470	-0.05311569202320517;5.5649006846625014e-08;-0.133692476941083;0.29197446164132207;4.034231728624891e-08	0.18567714849940714;1.1625844894017165e-10;0.5884140520116363;0.9964767416051534;8.158304352515166e-11	0.5204592414420701;0.9999971712532585;0.257236722845967;0.0007380290594170392;0.9999979582344025	0.179;0.001;0.681;0.133;0.001	0.078;0.001;0.500;0.419;0.001	s|1e2.1o5|2e2.1o5|3e2.1o5|5e2.1o5|i	TRUE	FALSE	FALSE	5	2	0;1;1;1;0	17	+	30696764-30700418;30696767-30700418;30696801-30700418;30697101-30700418;30697470-30697471	30696618-30697470;30697471-30700417;30700418-30700476	30697471-30700417
38	WHSC1L1	gene:ENSG00000147548	ENSG00000147548:s:38138985-38139101	-7.812315988292111e-06;-7.812315988292111e-06;-7.812315988292111e-06;-0.3368376530721678;0.34317523043719866	6.174358825368353e-07;6.174358825368353e-07;6.174358825368353e-07;0.9998025846377475;0.9996922117164107	0.9997711599237713;0.9997711599237713;0.9997711599237713;2.1475826022965272e-05;4.7506426917353955e-05	0.003;0.003;0.003;0.356;0.642	0.002;0.002;0.002;0.015;0.978	s|1e1.1o1|1e2.5o5|3e2.1o5|2e2.1o5|1e2.1o5	TRUE	TRUE	TRUE	5	3	1;1;1;0;0	8	-	38138882-38138985;38137222-38138985;38137199-38139020;38137199-38139018;38137199-38138985	38137058-38137222;38138770-38138882;38138985-38139101
39	SLC35F6	gene:ENSG00000213699	ENSG00000213699:s:26997119-26997191	-0.20807439802895086;-0.029327248043847447;0.36104827970788467	0.731183993070647;0.05758281617985954;0.9997359508662159	0.19491818323584187;0.7202316580932021;0.00010447014681518986	0.880;0.111;0.009	0.620;0.005;0.374	s|1e1.1o4|1e1.3o4|1e2.1o4	FALSE	TRUE	TRUE	3	3	0;1;0	2	+	26997191-26997912;26997191-26997916;26997191-26998332	26997119-26997191;26997912-26998083;26998332-26998657
40	SLC35F6	gene:ENSG00000213699	ENSG00000213699:t:26998332-26998657	-0.0002898358838930288;-0.0002898358838930288;0.43206708121274706;-0.43230032002373575	0.00013668855347307303;0.00013668855347307303;0.9996172316691961;0.9978405862102034	0.9961081993946423;0.9961081993946423;0.00023630861642306753;0.001405770662715189	0.010;0.010;0.010;0.970	0.005;0.005;0.456;0.536	t|1e1.1o9|1e2.1o2|1e3.1o3|1e4.1o1	FALSE	FALSE	TRUE	4	5	1;1;0;0	2	+	26987294-26998332;26987866-26998332;26997191-26998332;26998083-26998332	26987156-26987294;26987551-26987866;26997119-26997191;26997912-26998083;26998332-26998657
41	ZNF195	gene:ENSG00000005801	ENSG00000005801:s:3382973-3383119	-3.90712556677751e-05;0.3568042684672489;0.01079500326161631;-0.45900914218045924	0.000303012258586715;0.9822695065489505;0.016667717545614514;0.9931647612311097	0.992873106047445;0.01007426932166102;0.8884987889737317;0.004754788595570103	0.010;0.010;0.010;0.969	0.010;0.385;0.094;0.510	s|3e1.1o3|1e1.1o3|3e2.1o9|1e2.1o9	TRUE	FALSE	TRUE	4	3	1;0;1;0	11	-	3382018-3383027;3382018-3382973;3381795-3383027;3381795-3382973	3379157-3381795;3381950-3382018;3382973-3383119
42	SOCS2	gene:ENSG00000120833	ENSG00000120833:t:93966461-93966812	0.34245128917093026;-6.722340621122002e-09;-6.722340621122002e-09;-0.2720717744372716;-6.722340621122002e-09;-6.722340621122002e-09;-6.722340621122002e-09;-6.722340621122002e-09;-6.669994373498982e-09;-6.722340621122002e-09;-0.047725874808771204;-6.722340621122002e-09;2.1782850950305286e-05;-6.722340621122002e-09;-0.0001794059118217889;3.100739317324771e-05	0.9998973827461246;6.205649076530502e-13;6.205649076530502e-13;0.9918684370264835;6.205649076530502e-13;6.205649076530502e-13;6.205649076530502e-13;6.205649076530502e-13;6.20564907246867e-13;6.205649076530502e-13;0.0956041813479495;6.205649076530502e-13;3.855240290878515e-09;6.205649076530502e-13;2.4115423691398473e-07;2.6758019233728075e-10	7.387618879529923e-06;0.999999931176617;0.999999931176617;0.001746088443402849;0.999999931176617;0.999999931176617;0.999999931176617;0.999999931176617;0.9999999306407226;0.999999931176617;0.5306307861733659;0.999999931176617;0.9995629744975835;0.999999931176617;0.9981633343003787;0.9996824242647748	0.172;0.000;0.000;0.639;0.000;0.000;0.000;0.000;0.000;0.000;0.152;0.000;0.012;0.000;0.023;0.000	0.502;0.000;0.000;0.375;0.000;0.000;0.000;0.000;0.003;0.000;0.065;0.000;0.024;0.000;0.005;0.023	t|1e1.1o3|1e2.1o3|1e2.2o3|1e3.1o5|2e3.1o5|3e3.1o5|4e3.1o5|1e3.5o5|1e4.1o4|1e4.2o4|1e5.1o3|1e6.1o2|1e7.1o5|1e7.3o5|1e7.4o5|1e7.5o5	TRUE	TRUE	TRUE	16	8	0;1;0;0;1;1;1;1;1;0;0;1;0;1;1;0	12	+	93963974-93966461;93964318-93966461;93964441-93966461;93964992-93966461;93964992-93966469;93964992-93966512;93964992-93966572;93964998-93966461;93965200-93966461;93965202-93966461;93965690-93966461;93965841-93966461;93965962-93966461;93966012-93966461;93966050-93966461;93966151-93966461	93963590-93963974;93964174-93964441;93964756-93964998;93965100-93965202;93965480-93965690;93965728-93965841;93965911-93966151;93966461-93966812
43	FKRP	gene:ENSG00000181027	ENSG00000181027:t:47251284-47251345	-0.00013265511067502106;-0.010096666994470753;-0.00013265511067502106;-0.00013265511067502106;-0.00013265511067502106;0.026660866714956818;0.3336906167305801;-0.00013265511067502106;-0.00013265511067502106;-0.00013265511067502106;-0.3204531296142305	7.855771498062536e-05;0.05993406826662642;7.855771498062536e-05;7.855771498062536e-05;7.855771498062536e-05;0.044482099055137996;0.9949844578982924;7.855771498062536e-05;7.855771498062536e-05;7.855771498062536e-05;0.9586878614108284	0.9982629688881495;0.8139651733025738;0.9982629688881495;0.9982629688881495;0.9982629688881495;0.7361518851107112;0.003231462402625788;0.9982629688881495;0.9982629688881495;0.9982629688881495;0.014619529671489606	0.005;0.605;0.005;0.005;0.005;0.005;0.005;0.005;0.005;0.005;0.346	0.002;0.532;0.002;0.002;0.002;0.103;0.349;0.002;0.002;0.002;0.002	t|1e1.1o4|1e1.2o4|1e2.1o1|1e3.1o1|1e4.1o1|1e5.1o2|1e5.2o2|1e6.1o4|1e6.2o4|1e6.3o4|i	TRUE	FALSE	TRUE	11	7	0;0;1;1;0;0;0;1;1;0;0	19	+	47249343-47251284;47249347-47251284;47249859-47251284;47250117-47251284;47250249-47251284;47250551-47251284;47250562-47251284;47250889-47251284;47250938-47251284;47250989-47251284;47251283-47251284	nan-47249859;nan-47250117;47249303-47249347;47250167-47250249;47250491-47250562;47250836-47250989;47250990-47251283;47251284-47251345	47250990-47251283
44	MCM8	gene:ENSG00000125885	ENSG00000125885:t:5958522-5958663	-8.177458080661035e-05;0.008206760402540147;0.03670361968992096;-8.177458080661035e-05;-0.2929783908090512;-8.177458080661035e-05;-8.177458080661035e-05;0.08551410625895242	2.228982835689697e-05;0.0034001660099075436;0.06454588792009865;2.228982835689697e-05;0.9763691026978204;2.228982835689697e-05;2.228982835689697e-05;0.3546882356263589	0.998977741096846;0.9147039631207992;0.6388971737350877;0.998977741096846;0.014058402634305578;0.998977741096846;0.998977741096846;0.2894713082256465	0.004;0.004;0.004;0.004;0.973;0.004;0.004;0.004	0.002;0.062;0.105;0.002;0.678;0.002;0.002;0.151	t|1e1.1o3|1e2.1o8|1e3.1o5|1e4.1o4|1e5.1o4|2e5.1o4|1e6.1o1|1e7.1o2	FALSE	TRUE	TRUE	8	8	1;1;0;1;0;1;1;1	20	+	5948233-5958522;5948671-5958522;5952683-5958522;5953372-5958522;5953842-5958522;5953842-5958526;5955723-5958522;5958025-5958522	nan-5955723;5948082-5948233;5948476-5948671;5952635-5952683;5953222-5953372;5953702-5953842;5957935-5958025;5958522-5958663
45	LUC7L	gene:ENSG00000007392	ENSG00000007392:t:277241-277685	0.5016224009138038;-0.48537885156443256;-6.535855707967989e-06;-6.535855707967989e-06;-0.0002444197239233088	0.9999805232334432;0.999948300097166;2.5251905287824324e-07;2.5251905287824324e-07;1.0276933668081853e-05	6.9237244810749875e-06;1.9930893237152247e-05;0.9998613390224506;0.9998613390224506;0.997427327745425	0.214;0.766;0.003;0.003;0.015	0.692;0.297;0.002;0.002;0.002	t|1e1.1o5|1e2.2o3|1e2.1o3|1e3.2o2|1e3.1o2	TRUE	FALSE	TRUE	5	4	0;0;1;1;1	16	-	277335-279278;277335-278332;277335-278293;277335-277986;277335-277981	277241-277685;277981-278069;278293-278401;279278-279462
46	APITD1	gene:ENSG00000175279	ENSG00000175279:t:10493899-10494178	0.2871290845645444;-0.300736964283541;7.74804579113124e-05;7.74804579113124e-05	0.9808409218236346;0.9795401060046117;3.593632147468791e-05;3.593632147468791e-05	0.004424254208988958;0.007304961678268773;0.997835322546288;0.997835322546288	0.005;0.985;0.005;0.005	0.306;0.682;0.007;0.007	t|1e1.1o9|1e2.1o6|1e2.5o6|1e2.6o6	TRUE	FALSE	TRUE	4	3	0;0;1;1	1	+	10490625-10493899;10491458-10493899;10491499-10493899;10491681-10493899	10490159-10490625;10490840-10491681;10493899-10494178
47	ZNF222	gene:ENSG00000159885	ENSG00000159885:t:44531175-44531301	-0.37955199427403047;0.3747978675689601;5.318305207100562e-05	0.9998052106134121;0.9998559266953039;1.6506585208544304e-05	3.561860654055504e-05;1.3943883141880142e-05;0.9982706443256538	0.989;0.005;0.005	0.611;0.381;0.007	t|1e1.1o2|1e2.1o2|1e3.1o1	FALSE	FALSE	TRUE	3	4	0;0;1	19	+	44529630-44531175;44530238-44531175;44530922-44531175	44529494-44529630;44530178-44530238;44530724-44530922;44531175-44531301
48	OSGEPL1	gene:ENSG00000128694	ENSG00000128694:t:190611386-190612061	3.837125800388604e-06;3.837125800388604e-06;3.837125800388604e-06;-0.049625127121080914;0.0013878960270066439;3.837125800388604e-06;-0.13165307487970554;3.837125800388604e-06;0.3170044430216214;3.837125800388604e-06;3.837125800388604e-06;-0.0023987901283602127;3.837125800388604e-06;3.837125800388604e-06;3.837125800388604e-06;3.837125800388604e-06	1.4875572569417417e-07;1.4875572569417417e-07;1.4875572569417417e-07;0.16587087497158767;0.00017021572578949167;1.4875572569417417e-07;0.508368370469012;1.4875572569417417e-07;0.9778627005615664;1.4875572569417417e-07;1.4875572569417417e-07;0.00014676735552937898;1.4875572569417417e-07;1.4875572569417417e-07;1.4875572569417417e-07;1.4875572569417417e-07	0.9999510822495595;0.9999510822495595;0.9999510822495595;0.5446057120237459;0.9858011122210134;0.9999510822495595;0.36668381194967536;0.9999510822495595;0.011312019374803155;0.9999510822495595;0.9999510822495595;0.9753721710358075;0.9999510822495595;0.9999510822495595;0.9999510822495595;0.9999510822495595	0.001;0.001;0.001;0.128;0.001;0.001;0.631;0.001;0.195;0.001;0.001;0.038;0.001;0.001;0.001;0.001	0.001;0.001;0.001;0.032;0.032;0.001;0.418;0.001;0.508;0.001;0.001;0.001;0.001;0.001;0.001;0.001	t|5e1.1o5|4e1.1o5|2e1.1o5|4e2.1o5|2e2.1o5|5e3.2o12|4e3.2o12|3e3.2o12|2e3.2o12|1e3.2o12|4e3.1o12|2e4.1o1|4e5.3o4|2e5.3o4|4e5.2o4|2e5.1o4	TRUE	TRUE	TRUE	16	6	1;1;1;1;1;1;0;1;0;1;1;1;1;1;1;1	2	-	190612061-190617575;190612057-190617575;190611894-190617575;190612057-190617379;190611894-190617379;190612061-190615276;190612057-190615276;190611897-190615276;190611894-190615276;190611888-190615276;190612057-190615265;190611894-190613847;190612057-190612661;190611894-190612661;190612057-190612419;190611894-190612415	190611386-190612061;190612415-190612807;190613847-190613968;190615265-190615382;190617379-190617450;190617575-190617705
49	PLXDC1	gene:ENSG00000161381	ENSG00000161381:s:37234166-37234301	0.006782237175988988;-0.0011755470003207698;-4.198299339225177e-06;0.00047252750536380114;8.321567018285016e-05;0.2105860466198584;-4.198299339225177e-06;-0.3064363358523076;-4.198299339225177e-06	0.001380817090325017;0.00010674874205365022;1.681996701101742e-07;1.6627726123650108e-05;1.780982854371713e-06;0.7921461918510815;1.681996701101742e-07;0.9853017597321476;1.681996701101742e-07	0.9306128969621057;0.9879415122554766;0.9999210272600539;0.9950431807962034;0.9990264704548913;0.13376251948863088;0.9999210272600539;0.006259855675556203;0.9999210272600539	0.002;0.029;0.002;0.002;0.002;0.555;0.002;0.408;0.002	0.056;0.001;0.001;0.023;0.012;0.792;0.001;0.112;0.001	s|1e1.1o1|1e2.1o1|1e3.1o1|1e4.2o2|1e4.1o2|1e5.1o5|1e6.7o8|1e6.1o8|1e7.5o6	FALSE	TRUE	TRUE	9	8	1;1;1;1;1;0;1;1;1	17	-	37233481-37234166;37232327-37234166;37229915-37234166;37229007-37234166;37228915-37234166;37228738-37234166;37226281-37234166;37226269-37234166;37224212-37234166	37219556-37224212;37226109-37226281;37228608-37228738;37228883-37229007;37229859-37229915;37232206-37232327;37233370-37233481;37234166-37234301
50	PLXDC1	gene:ENSG00000161381	ENSG00000161381:s:37239712-37239793	-1.0151007493385115e-05;-0.006681585961672586;0.0005047525206182406;-1.0151007493385115e-05;-0.08394105416140818;0.4030989415870713;-0.12562955026200148	3.387574247823457e-06;0.003573779345273219;6.11711266359878e-05;3.387574247823457e-06;0.33655490281599953;0.9848110912628681;0.46292153688931986	0.999505610165207;0.9228256669625688;0.9942455299626104;0.999505610165207;0.31923228183689156;0.010039984352684609;0.41584456780173484	0.003;0.059;0.003;0.003;0.153;0.333;0.442	0.003;0.020;0.020;0.003;0.003;0.727;0.221	s|1e1.1o1|1e2.2o2|1e2.1o2|1e3.6o6|1e3.4o6|1e3.1o6|1e4.1o6	FALSE	TRUE	TRUE	7	5	1;0;1;1;1;0;0	17	-	37239497-37239712;37237702-37239712;37237699-37239712;37235965-37239712;37235786-37239712;37235781-37239712;37235417-37239712	nan-37239497;37235357-37235417;37235674-37235965;37237503-37237702;37239712-37239793
51	KDM6B	gene:ENSG00000132510	ENSG00000132510:t:7748219-7748338	-3.718807317706434e-05;-3.718807317706434e-05;-3.718807317706434e-05;-3.718807317706434e-05;-0.6932945032539429;-3.718807317706434e-05;-3.372848995372665e-05;-3.718807317706434e-05;-3.718807317706434e-05;-0.04030822759829619;0.11367098025662566;-3.372848995372665e-05;-3.718807317706434e-05;-3.718807317706434e-05;-3.718807317706434e-05;-3.718807317706434e-05;-3.718807317706434e-05;-3.7188073177064…	1.1085072762827259e-05;1.1085072762827259e-05;1.1085072762827259e-05;1.1085072762827259e-05;0.9999992398249294;1.1085072762827259e-05;1.1085566291449454e-05;1.1085072762827259e-05;1.1085072762827259e-05;0.11460890938480078;0.6092169201176973;1.1085566291449454e-05;1.1085072762827259e-05;1.1085072762827259e-05;1.1085072762827259e-05;1.1085072762827259e-05;1.1085072762827259e-05;1.1085072762827259e…	0.9996213076230499;0.9996213076230499;0.9996213076230499;0.9996213076230499;2.929867246592721e-07;0.9996213076230499;0.9995858986983555;0.9996213076230499;0.9996213076230499;0.6551551774387668;0.09248325353040289;0.9995858986983555;0.9996213076230499;0.9996213076230499;0.9996213076230499;0.9996213076230499;0.9996213076230499;0.9996213076230499;0.9995858986983555;0.9996179951098176;5.8874556466604…	0.001;0.001;0.001;0.001;0.829;0.001;0.001;0.001;0.001;0.139;0.001;0.001;0.001;0.001;0.001;0.001;0.001;0.001;0.001;0.001;0.001;0.001;0.001	0.000;0.000;0.000;0.000;0.146;0.000;0.010;0.000;0.000;0.025;0.149;0.010;0.000;0.000;0.000;0.000;0.000;0.000;0.010;0.005;0.646;0.000;0.000	t|1e1.1o1|1e2.1o1|1e3.1o1|1e4.1o1|1e5.1o7|1e6.1o1|1e7.1o1|1e8.1o1|1e9.1o1|1e10.1o1|1e11.1o8|1e11.3o8|1e11.4o8|1e11.5o8|1e11.6o8|1e11.7o8|1e11.8o8|1e12.1o1|1e13.1o1|1e14.1o1|1e15.1o1|1e16.1o1|1e17.1o1	TRUE	FALSE	TRUE	23	18	1;1;1;1;0;1;1;1;1;1;1;1;1;1;1;1;1;1;1;1;1;1;1	17	+	7737668-7748219;7738733-7748219;7739497-7748219;7739897-7748219;7743342-7748219;7743688-7748219;7744957-7748219;7745014-7748219;7745095-7748219;7745228-7748219;7745358-7748219;7745397-7748219;7745490-7748219;7745495-7748219;7745794-7748219;7745837-7748219;7745934-7748219;7746474-7748219;7747116-7748219;7747563-7748219;7747671-7748219;7747820-7748219;7748098-7748219	nan-7744957;nan-7745014;nan-7745095;nan-7745228;nan-7746474;nan-7747116;nan-7747563;nan-7747671;nan-7747820;nan-7748098;7737658-7737668;7738723-7738733;7739487-7739497;7739887-7739897;7743222-7743342;7743602-7743688;7745229-7745934;7748219-7748338
52	PRR3	gene:ENSG00000204576	ENSG00000204576:t:30529611-30529901	2.4263569336298837e-05;2.4263569336298837e-05;0.2562556254091983;-0.019602585693407053;2.4263569336298837e-05;-0.11025036860416537	2.8161312918207242e-06;2.8161312918207242e-06;0.9574856858410696;0.03236406681344267;2.8161312918207242e-06;0.43817989618175057	0.9995696521714283;0.9995696521714283;0.016410971755988258;0.7891124442759497;0.9995696521714283;0.4176792069335806	0.002;0.002;0.029;0.109;0.002;0.856	0.003;0.003;0.290;0.042;0.003;0.657	t|1e1.1o2|1e2.1o1|1e3.1o6|1e4.1o3|1e5.1o1|1e6.1o1	FALSE	FALSE	TRUE	6	7	1;1;0;0;1;1	6	+	30524097-30529611;30524530-30529611;30525227-30529611;30525989-30529611;30526730-30529611;30529285-30529611	nan-30526730;30524087-30524097;30524520-30524530;30524663-30525297;30525927-30525989;30529087-30529285;30529611-30529901
53	MSANTD2	gene:ENSG00000120458	ENSG00000120458:t:124644615-124646138	-4.795200094955937e-06;-4.795200094955937e-06;-0.022216409993862176;-4.795200094955937e-06;0.42962000035429987;-0.007633508971550066;-0.004633051023058491;-0.016414594855421048;-0.004883480028264377;-0.007633508971550066;-4.795200094955937e-06	3.715583911740038e-05;3.715583911740038e-05;0.08934522379046576;3.715583911740038e-05;0.9944674513391419;0.007197770514721811;0.020922188829800896;0.05743127465381234;0.006957207801984237;0.007197770514721811;3.715583911740038e-05	0.9985645282922743;0.9985645282922743;0.7811105618910703;0.9985645282922743;0.0034986503586719223;0.9224658085886044;0.8651390327251964;0.8079348746348569;0.9152853136651783;0.9224658085886044;0.9985645282922743	0.003;0.003;0.403;0.003;0.036;0.070;0.136;0.203;0.070;0.070;0.003	0.003;0.003;0.274;0.003;0.469;0.003;0.103;0.103;0.036;0.003;0.003	t|3e1.7o8|1e1.7o8|3e1.1o8|2e1.1o8|1e1.1o8|3e2.5o6|1e2.5o6|3e2.3o6|1e2.3o6|1e2.2o6|1e2.1o6	TRUE	TRUE	TRUE	11	3	1;1;0;1;0;1;1;1;1;1;1	11	-	124644870-124670141;124644714-124670141;124644870-124669767;124644727-124669767;124644714-124669767;124644870-124648946;124644714-124648946;124644870-124648900;124644714-124648900;124644714-124648877;124644714-124648868	124644615-124646138;124648868-124649035;124669767-124670569
54	WIBG	gene:ENSG00000170473	ENSG00000170473:t:56307483-56308150	-0.009858031054611029;-3.747513275506591e-08;-3.747513275506591e-08;-0.2832963793717022;0.23954599387238557;0.006400902552026773;-3.747513275506591e-08;0.007605970501160533;-3.747513275506591e-08	0.002221865156741188;2.8003166977451134e-09;2.8003166977451134e-09;0.9674057455868723;0.9915975748495424;0.000732269071307917;2.8003166977451134e-09;0.01181348807595544;2.8003166977451134e-09	0.8901648706676752;0.9999901859868967;0.9999901859868967;0.016376082861814023;0.0011643711033298627;0.9340005826091331;0.9999901859868967;0.8785692246890826;0.9999901859868967	0.061;0.001;0.001;0.765;0.027;0.010;0.001;0.136;0.001	0.027;0.001;0.001;0.476;0.262;0.053;0.001;0.171;0.001	t|1e1.1o8|1e2.1o2|1e3.1o3|1e4.1o11|1e5.1o4|1e6.1o2|1e7.1o1|1e8.1o3|1e9.1o1	FALSE	FALSE	TRUE	9	10	1;1;1;0;0;1;1;1;1	12	-	56308150-56326313;56308150-56321849;56308150-56321739;56308150-56321509;56308150-56320860;56308150-56317225;56308150-56316175;56308150-56309227;56308150-56308740	56307483-56308150;56308740-56308995;56309227-56309339;56316175-nan;56317225-56317345;56320860-56321051;56321509-56321697;56321739-56321749;56321849-56321859;56326313-56326402
55	ZNF852	gene:ENSG00000178917	ENSG00000178917:t:44540462-44542129	-0.44101612556004655;0.0038261815896149286;0.003854261814325569;0.3750773882471115	0.9984164745492472;0.0022714527882927403;0.04786137148820835;0.9929570588835143	0.0004147238310752144;0.9511820801749187;0.8272196758079391;0.0049243419756866	0.463;0.013;0.512;0.013	0.006;0.051;0.546;0.397	t|2e1.1o6|1e1.1o6|2e2.1o3|1e2.1o3	FALSE	TRUE	TRUE	4	3	1;1;1;0	3	-	44542129-44552045;44542126-44552045;44542129-44544034;44542126-44544034	44540462-44542129;44544034-44544200;44552045-44552128
56	TARBP1	gene:ENSG00000059588	ENSG00000059588:t:234536927-234537008	-0.21335089988003025;-7.642050235728614e-10;-0.001707911122627358;-1.2028134239909051e-06;0.2614079510438532;-7.642050235728614e-10;-7.642050235728614e-10;-7.642050235728614e-10;4.069726269620273e-09;-2.982972748580247e-05;-1.2028134239909051e-06	0.9007351958186687;7.746672457884847e-15;7.926027858100497e-06;4.6252754533243535e-11;0.9796214815352366;7.746672457884847e-15;7.746672457884847e-15;7.746672457884847e-15;8.190760925740427e-15;4.259979731685807e-09;4.6252754533243535e-11	0.04173129404519582;0.9999999921472138;0.9763989023873917;0.9999876861725397;0.006648188423602426;0.9999999921472138;0.9999999921472138;0.9999999921472138;0.9999999426598438;0.9996946185229725;0.9999876861725397	0.767;0.000;0.039;0.009;0.155;0.000;0.000;0.000;0.000;0.018;0.009	0.551;0.000;0.031;0.000;0.411;0.000;0.000;0.000;0.006;0.000;0.000	t|1e1.1o2|1e2.3o3|1e2.2o3|1e2.1o3|1e3.1o1|1e4.1o1|1e5.1o1|1e6.1o1|1e7.1o1|1e8.1o1|1e9.1o1	TRUE	FALSE	TRUE	11	10	0;1;1;1;1;1;1;1;1;1;1	1	-	234537008-234541649;234537008-234541179;234537008-234541058;234537008-234541029;234537008-234537962;234537008-234537862;234537008-234537670;234537008-234537608;234537008-234537589;234537008-234537536;234537008-234537282	234536927-234537008;234537282-nan;234537536-nan;234537589-nan;234537608-nan;234537670-nan;234537862-nan;234537962-nan;234541029-234541226;234541649-234541845
57	TPTE2P5	gene:ENSG00000168852	ENSG00000168852:s:41495755-41495890	-0.08613030225831718;-0.01893858498499636;-0.005775343250494968;1.0543765507643876e-05;0.26049412194847477;1.0543765507643876e-05;0.0023860839277311118;1.0543765507643876e-05;1.0543765507643876e-05;1.0543765507643876e-05;0.0005793835198094631	0.33531390570406117;0.012230311506822106;0.0012889881872495078;9.846170264042446e-07;0.9566311818524936;9.846170264042446e-07;0.000566251014960635;9.846170264042446e-07;9.846170264042446e-07;9.846170264042446e-07;0.0024515455948513534	0.520108188180789;0.807749681701124;0.940769084542651;0.999824705816337;0.01782701742307081;0.999824705816337;0.975583358190575;0.999824705816337;0.999824705816337;0.999824705816337;0.9205926720272309	0.779;0.075;0.051;0.001;0.038;0.001;0.001;0.001;0.001;0.001;0.051	0.588;0.002;0.002;0.002;0.304;0.002;0.039;0.002;0.002;0.002;0.058	s|1e1.1o1|1e2.1o1|1e3.1o1|1e4.1o1|1e5.2o2|1e5.1o2|1e6.1o1|1e7.1o1|1e8.1o7|1e9.2o4|1e10.2o3	FALSE	TRUE	TRUE	11	11	0;1;1;1;1;1;1;1;1;1;1	13	-	41495667-41495755;41488241-41495755;41486859-41495755;41486856-41495755;41482348-41495755;41482342-41495755;41455172-41495755;41444733-41495755;41429951-41495755;41410824-41495755;41400730-41495755	nan-41444733;nan-41455172;nan-41486856;nan-41486859;nan-41488241;41400642-41400730;41410694-41411021;41429891-41429951;41482295-41482348;41495610-41495667;41495755-41495890
58	RWDD2A	gene:ENSG00000013392	ENSG00000013392:t:83905314-83908651	-1.9528228902384145e-05;-0.4863730341544801;-1.9528228902384145e-05;-1.9528228902384145e-05;0.005785706245638328;0.42342412999814355	2.1108070644658866e-05;0.9980310114293309;2.1108070644658866e-05;2.1108070644658866e-05;0.021636674295185114;0.9999448745578898	0.9985525159543531;0.0012237437652368177;0.9985525159543531;0.9985525159543531;0.8618182222755425;1.2141796823227966e-05	0.004;0.854;0.004;0.004;0.129;0.004	0.004;0.385;0.004;0.004;0.167;0.434	t|1e1.1o8|1e1.2o8|2e1.2o8|3e1.2o8|1e2.1o2|i	TRUE	TRUE	TRUE	6	3	1;0;1;1;1;0	6	+	83904295-83905314;83904371-83905314;83904371-83905444;83904371-83905459;83904990-83905314;83905313-83905314	83904031-83904371;83904706-83904990;83904991-83905313;83905314-83908651	83904991-83905313
59	CD44	gene:ENSG00000026508	ENSG00000026508:t:35232793-35232996	-0.00047523392523669464;-0.42510100510064763;-9.92395970352676e-07;-9.92395970352676e-07;-9.92395970352676e-07;-9.92395970352676e-07;-9.92395970352676e-07;-9.92395970352676e-07;-9.92395970352676e-07;-9.92395970352676e-07;0.41323691148774017;-0.00257744402020825;0.0047611487205314615	1.574658021993588e-05;0.9999290792455958;1.1141451188060788e-08;1.1141451188060788e-08;1.1141451188060788e-08;1.1141451188060788e-08;1.1141451188060788e-08;1.1141451188060788e-08;1.1141451188060788e-08;1.1141451188060788e-08;0.9999246253345276;0.00045957348406563703;0.0003534859365526754	0.9951328333368866;2.078774236558001e-05;0.9999863223783335;0.9999863223783335;0.9999863223783335;0.9999863223783335;0.9999863223783335;0.9999863223783335;0.9999863223783335;0.9999863223783335;2.2537018568652537e-05;0.9536478830621665;0.9512702525135898	0.022;0.803;0.001;0.001;0.001;0.001;0.001;0.001;0.001;0.001;0.122;0.045;0.001	0.001;0.389;0.001;0.001;0.001;0.001;0.001;0.001;0.001;0.001;0.522;0.032;0.048	t|1e1.1o8|1e2.2o24|3e2.2o24|1e3.1o12|3e3.1o12|1e4.1o8|2e4.1o8|1e4.7o8|1e5.1o11|1e5.2o11|1e5.3o11|3e5.3o11|1e5.10o11	TRUE	TRUE	TRUE	13	6	0;0;1;1;1;1;1;0;1;1;0;1;1	11	+	35211519-35232793;35211612-35232793;35211612-35232811;35219793-35232793;35219793-35232811;35229753-35232793;35229753-35232797;35229756-35232793;35231598-35232793;35231600-35232793;35231601-35232793;35231601-35232811;35231728-35232793	35211382-35211519;35211557-35211612;35219619-35219793;35229652-35229756;35231512-35231728;35232793-35232996
60	LINC00674	gene:ENSG00000237854	ENSG00000237854:t:66110563-66110668	-3.321952397075022e-06;-3.321952397075022e-06;-0.29004395714901454;-3.321952397075022e-06;-3.321952397075022e-06;-0.0010094283773578478;-3.321952397075022e-06;-3.321952397075022e-06;0.49586091827008805;-0.12816180617425063	9.343077007386318e-08;9.343077007386318e-08;0.9411641760418183;9.343077007386318e-08;9.343077007386318e-08;7.48077934470168e-05;9.343077007386318e-08;9.343077007386318e-08;0.9999926592531457;0.6484860555609979	0.999946464057935;0.999946464057935;0.034564840271927744;0.999946464057935;0.999946464057935;0.9896545710833361;0.999946464057935;0.999946464057935;1.9024545434539901e-06;0.12857781904578724	0.001;0.001;0.495;0.001;0.001;0.027;0.001;0.001;0.289;0.180	0.001;0.001;0.198;0.001;0.001;0.001;0.001;0.001;0.774;0.021	t|1e1.1o1|1e2.1o6|1e2.2o6|1e2.3o6|1e2.4o6|1e2.5o6|1e2.6o6|1e3.1o1|1e4.1o1|1e5.1o1	TRUE	FALSE	TRUE	10	6	1;1;1;0;1;1;1;1;1;1	17	+	66097736-66110563;66098087-66110563;66098100-66110563;66098102-66110563;66098139-66110563;66098197-66110563;66098438-66110563;66099043-66110563;66099199-66110563;66102694-66110563	nan-66099043;nan-66099199;nan-66102694;66097726-66097736;66098049-66098438;66110563-66110668
61	MAPK9	gene:ENSG00000050748	ENSG00000050748:s:179718848-179719099	0.2835128098044159;2.166288423278247e-05;-0.2833716885807075;2.166288423278247e-05;2.166288423278247e-05;2.166288423278247e-05	0.9577528631352197;5.033369933816635e-06;0.9487726606373762;5.033369933816635e-06;5.033369933816635e-06;5.033369933816635e-06	0.021227232853830873;0.9993653319951366;0.027567129741502994;0.9993653319951366;0.9993653319951366;0.9993653319951366	0.052;0.003;0.937;0.003;0.003;0.003	0.341;0.003;0.649;0.003;0.003;0.003	s|1e1.1o2|1e2.1o2|1e3.4o6|1e3.1o6|1e4.1o7|1e5.2o5	FALSE	TRUE	TRUE	6	6	0;1;0;1;1;1	5	-	179714067-179718848;179709631-179718848;179707608-179718848;179707572-179718848;179696409-179718848;179676138-179718848	179675973-179676138;179696280-179696409;179707440-179707608;179709494-179709631;179713975-179714067;179718848-179719099
62	ZMYND8	gene:ENSG00000101040	ENSG00000101040:s:45848909-45848975	-0.2896732084389675;1.6449700502215994e-06;1.6449700502215994e-06;0.28727965751167406	0.9632817730847942;1.6778846535792992e-08;1.6778846535792992e-08;0.9592850568356581	0.01906218688694561;0.9999609734511451;0.9999609734511451;0.021383138906923196	0.695;0.002;0.002;0.301	0.401;0.002;0.002;0.595	s|1e1.2o4|1e1.1o4|1e2.1o3|1e3.1o6	FALSE	TRUE	TRUE	4	4	0;1;1;0	20	-	45841370-45848909;45841366-45848909;45839918-45848909;45839542-45848909	45837859-45839542;45839782-45839931;45841287-45841370;45848909-45848975
63	SRSF6	gene:ENSG00000124193	ENSG00000124193:t:42088411-42088535	-1.5044324061861377e-09;-1.5044324061861377e-09;0.3324456805232095;-1.4918072320765283e-09;-0.3347551470029301	1.1687928702130373e-14;1.1687928702130373e-14;0.9998463661857079;1.1687928700752626e-14;0.9998630167494335	0.9999999845982545;0.9999999845982545;6.971906374258537e-06;0.9999999844690043;6.0004380987299655e-06	0.001;0.001;0.279;0.001;0.717	0.000;0.000;0.610;0.004;0.386	t|1e1.2o3|1e2.1o6|1e2.2o6|1e3.1o1|1e4.1o1	TRUE	FALSE	TRUE	5	5	1;1;0;1;1	20	+	42086780-42088411;42087146-42088411;42087149-42088411;42087957-42088411;42088060-42088411	42086568-42086780;42087001-42087149;42087770-42087957;42088002-42088060;42088411-42088535
64	TRIT1	gene:ENSG00000043514	ENSG00000043514:s:40313658-40313814	-0.00804272173414818;-9.74078669841183e-06;-0.20883659311120617;-9.74078669841183e-06;0.250476355902917;-9.74078669841183e-06	0.003940536663649602;7.515273175711079e-07;0.8279849639959719;7.515273175711079e-07;0.9875310269795294;7.515273175711079e-07	0.9047614635993133;0.9997756031235314;0.10122163009233875;0.9997756031235314;0.00126275921954121;0.9997756031235314	0.064;0.003;0.926;0.003;0.003;0.003	0.027;0.002;0.695;0.002;0.270;0.002	s|1e1.5o5|1e1.4o5|1e1.2o5|1e1.1o5|1e2.1o2|1e3.1o6	FALSE	TRUE	TRUE	6	4	1;1;0;1;0;1	1	-	40313419-40313658;40313387-40313658;40313332-40313658;40313328-40313658;40312969-40313658;40310312-40313658	40310203-40310312;40312892-40312969;40313220-40313419;40313658-40313814
65	BCL2L1	gene:ENSG00000171552	ENSG00000171552:t:30309458-30310151	-0.01129857401824989;-0.004619670210471407;-7.984547745883855e-07;-0.012331273260100558;0.0051359718436497295;-0.13119314656877207;-0.06418108194414844;-0.09120222641843276;-7.984547745883855e-07;-7.984547745883855e-07;-7.984547745883855e-07;-7.984547745883855e-07;0.03927310773619164;0.4434359077511945	0.0031834718518309974;0.0029601415100641336;4.895633901679227e-09;0.003754745702141531;0.0003937102121286206;0.6470867024976651;0.24405279564996624;0.4086077281766153;4.895633901679227e-09;4.895633901679227e-09;4.895633901679227e-09;4.895633901679227e-09;0.026164198319410546;0.9999850410013783	0.880969925809165;0.9242585760007458;0.999991523833317;0.8741829704351944;0.9272603011818955;0.1439329202514371;0.45614855182983893;0.2979844138475588;0.999991523833317;0.999991523833317;0.999991523833317;0.999991523833317;0.6008769372480389;2.7535863865055247e-06	0.063;0.083;0.001;0.063;0.032;0.203;0.173;0.190;0.001;0.001;0.001;0.001;0.001;0.184	0.024;0.060;0.000;0.000;0.053;0.047;0.057;0.055;0.000;0.000;0.000;0.000;0.083;0.624	t|4e1.5o6|3e1.5o6|4e1.3o6|3e1.3o6|4e1.1o6|3e1.1o6|4e2.1o2|3e2.1o2|3e3.6o6|4e3.4o6|3e3.4o6|4e3.1o6|3e3.1o6|i	TRUE	TRUE	TRUE	14	4	0;0;1;1;0;0;0;0;1;0;1;1;1;0	20	-	30310151-30311667;30310133-30311667;30310151-30311651;30310133-30311651;30310151-30311538;30310133-30311538;30310151-30310421;30310133-30310421;30310133-30310280;30310151-30310247;30310133-30310247;30310151-30310220;30310133-30310220;30310151-30310152	30309458-30310151;30310152-30310219;30310220-30310400;30310421-30310901;30311538-30311792	30310152-30310219
66	KDM6A	gene:ENSG00000147050	ENSG00000147050:t:44920569-44920664	-1.2646601248675637e-05;0.6695530487360981;-0.6726566149455069	0.00016942808031754873;0.9999843620582662;0.9999851222601565	0.9938247660655578;9.180930562421933e-06;8.748722879037274e-06	0.010;0.104;0.885	0.010;0.760;0.229	t|1e1.1o4|1e2.1o2|1e3.1o1	FALSE	FALSE	TRUE	3	4	0;0;0	X	+	44918711-44920569;44919401-44920569;44920009-44920569	44918492-44918711;44919267-44919401;44919854-44920009;44920569-44920664
67	UBL7-AS1	gene:ENSG00000247240	ENSG00000247240:s:74771385-74771619	4.8975039997910153e-05;4.8975039997910153e-05;4.8975039997910153e-05;-0.09981212861267942;4.8975039997910153e-05;-0.028986691657728193;-0.009655489638789237;-0.0003160834594112872;-0.0016230885543662087;4.8975039997910153e-05;4.8975039997910153e-05;-0.0011425896468157395;0.007794077599528371;4.8975039997910153e-05;-0.0003160834594112872;-0.0003160834594112872;-0.0016230885543662087;0.002862302337…	2.1423094538687783e-05;2.1423094538687783e-05;2.1423094538687783e-05;0.3307269686097754;2.1423094538687783e-05;0.03805394468359241;0.0046385116444452295;5.048637288219944e-05;0.0002687420527184494;2.1423094538687783e-05;2.1423094538687783e-05;0.0030191459101727987;0.012875201006912125;2.1423094538687783e-05;5.048637288219944e-05;5.048637288219944e-05;0.0002687420527184494;0.0022276892410125248;0.…	0.9994213828892462;0.9994213828892462;0.9994213828892462;0.554433637098344;0.9994213828892462;0.7104043451109012;0.9007466812507605;0.9956864049181801;0.9823288692959528;0.9994213828892462;0.9994213828892462;0.9348844868733862;0.9000365044158181;0.9994213828892462;0.9956864049181801;0.9956864049181801;0.9823288692959528;0.9712565862929389;0.9823288692959528;0.000518294330513696;0.9994213828892462…	0.001;0.001;0.001;0.598;0.001;0.095;0.064;0.016;0.032;0.001;0.001;0.048;0.032;0.001;0.016;0.016;0.032;0.001;0.032;0.016;0.001;0.001	0.002;0.002;0.002;0.350;0.002;0.002;0.002;0.002;0.002;0.002;0.002;0.045;0.089;0.002;0.002;0.002;0.002;0.045;0.002;0.437;0.002;0.002	s|4e1.1o1|4e2.1o6|1e2.2o6|4e2.2o6|4e2.5o6|4e3.1o1|4e4.1o1|4e5.1o1|4e6.1o1|4e7.1o2|4e7.2o2|4e8.1o1|4e9.1o1|4e10.1o2|4e10.2o2|4e11.1o1|4e12.1o1|4e13.1o1|4e14.1o1|4e15.1o1|4e16.1o1|4e17.1o1	TRUE	TRUE	TRUE	22	18	0;1;1;0;1;1;1;1;1;1;1;1;1;1;1;1;1;1;1;1;1;1	15	+	74771619-74772962;74771619-74773369;74771488-74773392;74771619-74773392;74771619-74773422;74771619-74774114;74771619-74777995;74771619-74781930;74771619-74783302;74771619-74783805;74771619-74783809;74771619-74789520;74771619-74793922;74771619-74797430;74771619-74797434;74771619-74800558;74771619-74800665;74771619-74801002;74771619-74804599;74771619-74804733;74771619-74805671;74771619-74823530	74771385-74771619;74772962-74773255;74773369-74773643;74774114-74774124;74777995-74778005;74781930-74781940;74783302-74783312;74783805-74783819;74789520-74789530;74793922-74793932;74797430-74797444;74800558-74800568;74800665-74800675;74801002-74801012;74804599-74804609;74804733-74804743;74805671-74805681;74823530-74823540
68	TNPO1	gene:ENSG00000083312	ENSG00000083312:t:72144212-72144325	-0.0019907895993043845;-6.182827772582987e-05;0.25762738282250697;-0.21584062865514353	0.011124435200846505;5.850416344239581e-06;0.9955670165132372;0.7635289069755558	0.8858170582939549;0.9992989133963236;0.0005634099186215048;0.16711591484445476	0.159;0.005;0.005;0.832	0.145;0.003;0.278;0.581	t|1e1.1o3|1e1.3o3|1e2.1o2|1e2.2o2	TRUE	FALSE	TRUE	4	3	0;1;1;0	5	+	72112579-72144212;72112781-72144212;72144074-72144212;72144078-72144212	72112139-72112781;72144011-72144078;72144212-72144325
69	NT5C3A	gene:ENSG00000122643	ENSG00000122643:t:33075546-33075626	8.645640946076161e-06;-0.3668732345465525;-0.004236528996039867;8.645640946076161e-06;0.3887375136250728	2.0022663413060635e-07;0.9996742775867009;0.0004975753201662968;2.0022663413060635e-07;0.9999881197250403	0.9998972636580845;6.428241943268187e-05;0.9389219203648432;0.9998972636580845;6.9402409713763e-07	0.002;0.914;0.049;0.002;0.033	0.003;0.554;0.029;0.003;0.412	t|5e1.1o6|4e1.1o6|3e1.1o6|4e2.1o1|4e3.1o1	FALSE	TRUE	TRUE	5	4	1;1;1;1;0	7	-	33075626-33102180;33075600-33102180;33075597-33102180;33075600-33100373;33075600-33080484	33075546-33075626;33080484-33080767;33100373-33100455;33102180-33102409
70	TRIP12	gene:ENSG00000153827	ENSG00000153827:t:230744698-230744844	-6.50168652610522e-05;-6.50168652610522e-05;-6.50168652610522e-05;-6.50168652610522e-05;-0.33768711607387536;-6.50168652610522e-05;0.007628080820953919;-6.50168652610522e-05;-6.50168652610522e-05;0.01177176705550478;-6.50168652610522e-05;-6.50168652610522e-05;-6.50168652610522e-05;-6.50168652610522e-05;0.25491620938695725;-6.50168652610522e-05;-6.50168652610522e-05;-6.50168652610522e-05	2.6567115020052766e-05;2.6567115020052766e-05;2.6567115020052766e-05;2.6567115020052766e-05;0.8775501697350876;2.6567115020052766e-05;0.03452537524774439;2.6567115020052766e-05;2.6567115020052766e-05;0.005594327514130998;2.6567115020052766e-05;2.6567115020052766e-05;2.6567115020052766e-05;2.6567115020052766e-05;0.981602038873806;2.6567115020052766e-05;2.6567115020052766e-05;2.6567115020052766e-05	0.9992925620826105;0.9992925620826105;0.9992925620826105;0.9992925620826105;0.09412890636679505;0.9992925620826105;0.8384257901043036;0.9992925620826105;0.9992925620826105;0.8788619778758457;0.9992925620826105;0.9992925620826105;0.9992925620826105;0.9992925620826105;0.006032559843974068;0.9992925620826105;0.9992925620826105;0.9992925620826105	0.002;0.002;0.002;0.002;0.798;0.002;0.176;0.002;0.002;0.002;0.002;0.002;0.002;0.002;0.002;0.002;0.002;0.002	0.001;0.001;0.001;0.001;0.425;0.001;0.214;0.001;0.001;0.068;0.001;0.001;0.001;0.001;0.281;0.001;0.001;0.001	t|1e1.1o1|1e2.1o1|1e3.1o1|1e4.1o1|1e5.1o8|1e6.6o6|1e6.1o6|1e7.4o4|1e7.3o4|1e7.2o4|1e7.1o4|1e8.1o1|1e9.1o1|1e10.3o3|1e10.1o3|1e11.1o1|1e12.1o1|1e13.1o1	TRUE	FALSE	TRUE	18	14	0;1;1;1;0;1;0;1;1;0;1;1;1;1;1;1;1;0	2	-	230744844-230787864;230744844-230787598;230744844-230787474;230744844-230787368;230744844-230786596;230744844-230786343;230744844-230786280;230744844-230786025;230744844-230785990;230744844-230785987;230744844-230785772;230744844-230785444;230744844-230785376;230744844-230773723;230744844-230773681;230744844-230773101;230744844-230772272;230744844-230765453	230744698-230744844;230765453-230765574;230772272-nan;230773101-230773279;230773681-230773802;230785376-nan;230785444-nan;230785772-230786074;230786280-230786378;230786596-230786725;230787368-230787378;230787474-230787484;230787598-230787608;230787864-230787955
71	ZNF275	gene:ENSG00000063587	ENSG00000063587:s:152602092-152602168	1.5608615429434235e-05;1.5608615429434235e-05;0.03579792658761189;1.5608615429434235e-05;-0.34713866838824464;0.12512838040336152	7.056809196048436e-05;7.056809196048436e-05;0.13377852188206976;7.056809196048436e-05;0.9919932423402099;0.5240689295514755	0.9972949841283749;0.9972949841283749;0.7362959834976976;0.9972949841283749;0.0030546184484617767;0.24955997979770772	0.005;0.005;0.611;0.005;0.369;0.005	0.006;0.006;0.764;0.006;0.006;0.213	s|1e1.1o2|1e2.2o3|1e3.3o5|1e4.3o4|1e4.4o4|1e5.1o2	FALSE	TRUE	TRUE	6	6	1;1;0;1;1;1	X	+	152602168-152609580;152602168-152610129;152602168-152610978;152602168-152617294;152602168-152617375;152602168-152622649	152602092-152602168;152609580-152609664;152609735-152610237;152610975-152611079;152613212-152618384;152622649-152622659
72	C14orf159	gene:ENSG00000133943	ENSG00000133943:t:91623974-91624034	-0.0010851980640633554;1.3458573278101254e-07;1.3458573278101254e-07;1.3458573278101254e-07;0.3462601013679922;-0.1471423456797135;1.3458573278101254e-07;-0.002390222849975571;1.3458573278101254e-07;1.3458573278101254e-07;0.000559503890927445;1.3458573278101254e-07;0.010850810814918956;-0.1939183818852755;1.3458573278101254e-07	0.00012232266595766522;2.3954420983149394e-08;2.3954420983149394e-08;2.3954420983149394e-08;0.9972919458830427;0.6757479857472096;2.3954420983149394e-08;0.002213182249209595;2.3954420983149394e-08;2.3954420983149394e-08;2.243046888874267e-05;2.3954420983149394e-08;0.02695324728341502;0.8255989102651624;2.3954420983149394e-08	0.9779116756313904;0.9999753390119644;0.9999753390119644;0.9999753390119644;0.0010031989859982183;0.17652315488903947;0.9999753390119644;0.9176891473825609;0.9999753390119644;0.9999753390119644;0.9942512286704086;0.9999753390119644;0.846794722575873;0.0924906414627229;0.9999753390119644	0.034;0.001;0.001;0.001;0.134;0.256;0.001;0.067;0.001;0.001;0.001;0.001;0.185;0.321;0.001	0.024;0.001;0.001;0.001;0.475;0.070;0.001;0.058;0.001;0.001;0.024;0.001;0.241;0.105;0.001	t|2e1.1o4|2e2.1o5|2e3.1o1|1e4.1o10|2e4.1o10|2e5.1o6|2e6.1o11|2e6.3o11|2e6.11o11|2e7.1o1|2e8.1o3|2e9.1o1|2e10.1o5|2e11.1o2|2e12.1o1	TRUE	TRUE	TRUE	15	13	0;1;0;1;0;0;1;0;0;0;1;1;0;0;0	14	+	91527048-91623983;91527224-91623983;91574405-91623983;91580627-91623974;91580627-91623983;91580872-91623983;91581130-91623983;91581338-91623983;91581565-91623983;91591968-91623983;91595256-91623983;91605657-91623983;91611657-91623983;91614202-91623983;91615196-91623983	nan-91605657;91526677-91527048;91527176-91527224;91574330-91574405;91580357-91580627;91580714-91580872;91581014-91581565;91591883-91591968;91595090-91595256;91611565-91611934;91614122-91614202;91614574-91615196;91623974-91624034
73	LDLRAD4	gene:ENSG00000168675	ENSG00000168675:s:13464990-13465110	4.00230500421444e-06;0.33783654761260357;4.00230500421444e-06;0.0034058015163357883;0.006263814369894762;-0.000659776160233377;4.00230500421444e-06;4.00230500421444e-06;4.00230500421444e-06;4.00230500421444e-06;0.0008546437428975545;-0.000659776160233377;4.00230500421444e-06;4.00230500421444e-06;4.00230500421444e-06;4.00230500421444e-06;-0.4404382756920583;4.00230500421444e-06	2.2716976268025754e-06;0.9988454297974585;2.2716976268025754e-06;0.0012909074539565414;0.025479747199006825;9.837962433481514e-05;2.2716976268025754e-06;2.2716976268025754e-06;2.2716976268025754e-06;2.2716976268025754e-06;0.00017589017093709624;9.837962433481514e-05;2.2716976268025754e-06;2.2716976268025754e-06;2.2716976268025754e-06;2.2716976268025754e-06;0.9925847104075831;2.2716976268025754e-06	0.9997508830742773;0.00010987081600676272;0.9997508830742773;0.9651416775033071;0.8557275057613304;0.9929697972958473;0.9997508830742773;0.9997508830742773;0.9997508830742773;0.9997508830742773;0.991068765507781;0.9929697972958473;0.9997508830742773;0.9997508830742773;0.9997508830742773;0.9997508830742773;0.004784030692328023;0.9997508830742773	0.001;0.001;0.001;0.001;0.178;0.021;0.001;0.001;0.001;0.001;0.001;0.021;0.001;0.001;0.001;0.001;0.766;0.001	0.001;0.357;0.001;0.046;0.222;0.001;0.001;0.001;0.001;0.001;0.023;0.001;0.001;0.001;0.001;0.001;0.335;0.001	s|2e1.1o2|2e2.1o3|2e3.1o1|1e4.1o6|2e4.1o6|2e5.1o6|2e6.1o3|2e7.1o4|2e8.1o2|2e9.1o3|2e10.1o5|2e11.1o3|2e12.1o2|2e13.1o4|2e14.1o1|1e15.1o24|2e15.1o24|2e16.1o7	TRUE	FALSE	TRUE	18	17	1;1;1;1;0;1;1;1;1;1;1;1;1;1;1;1;1;1	18	+	13465110-13470065;13465110-13472992;13465110-13481677;13465106-13484036;13465110-13484036;13465110-13491231;13465110-13492094;13465110-13495999;13465110-13509790;13465110-13513494;13465110-13525409;13465110-13559695;13465110-13578394;13465110-13583828;13465110-13585365;13465106-13621116;13465110-13621116;13465110-13645126	13464990-13465110;13470065-nan;13472992-13473173;13481677-nan;13484036-13484118;13491231-13491468;13492094-13492266;13495999-nan;13509790-13509948;13513494-13513626;13525409-nan;13559695-nan;13578394-nan;13583828-13584048;13585365-13585452;13621116-13621270;13645126-13652754
74	DTX3	gene:ENSG00000178498	ENSG00000178498:s:57998405-57998645	0.0025092471467032798;-0.0001823739899517063;-0.0923962826093558;-0.0001823739899517063;-0.0001823739899517063;-0.0001823739899517063;0.383788895912069;-0.0001823739899517063;-0.023301455369503902	0.0022760700623733077;0.00028657762238340316;0.2866372675191606;0.00028657762238340316;0.00028657762238340316;0.00028657762238340316;0.9811684917999998;0.00028657762238340316;0.06083192022823046	0.9684123633626712;0.9957008571061002;0.6024517439863026;0.9957008571061002;0.9957008571061002;0.9957008571061002;0.013747911185189077;0.9957008571061002;0.8095370461119593	0.008;0.008;0.794;0.008;0.008;0.008;0.008;0.008;0.150	0.044;0.004;0.525;0.004;0.004;0.004;0.405;0.004;0.004	s|1e1.3o7|2e1.3o7|1e1.5o7|2e1.5o7|1e1.7o7|1e2.1o3|1e3.1o7|2e3.1o7|i	TRUE	TRUE	TRUE	9	4	0;1;0;1;1;0;0;1;0	12	+	57998641-57999127;57998645-57999127;57998641-57999354;57998645-57999354;57998641-57999367;57998641-57999772;57998641-57999973;57998645-57999973;57998645-57998646	57998405-57998645;57998646-57998789;57998790-57999514;57999772-57999812;57999973-58000035	57998646-57998789
75	THAP9-AS1	gene:ENSG00000251022	ENSG00000251022:s:83820976-83821376	0.010497620042749881;0.39921761962379076;-6.227772126446965e-05;0.06136568497208194;-0.5963226845505678;-6.227772126446965e-05	0.027556871469317804;0.9752530972322385;1.3636648472296814e-05;0.19171610612671092;0.9999994556045877;1.3636648472296814e-05	0.8440862260676706;0.017079056536643565;0.9990092555662754;0.4429253692217245;1.5525073948641221e-07;0.9990092555662754	0.107;0.254;0.004;0.004;0.629;0.004	0.167;0.653;0.003;0.133;0.052;0.003	s|2e1.1o1|2e2.1o2|3e3.1o4|2e3.1o4|2e4.1o5|2e5.1o1	TRUE	FALSE	TRUE	6	6	0;0;1;0;0;1	4	-	83820890-83821230;83819215-83821230;83816927-83821328;83816927-83821230;83816000-83821230;83803090-83821230	83803080-83803090;83814162-83816000;83816844-83816927;83818916-83819215;83820698-83820890;83820976-83821376
76	CATSPER2	gene:ENSG00000166762	ENSG00000166762:t:43920701-43922930	3.1543603417075743e-06;-0.5857548528540142;0.10852633275915925;0.3734729747592745	4.254148657320863e-05;0.9998171458734095;0.464776958783242;0.9256144175098099	0.9974726119410322;0.00011031564058261445;0.26525018044346255;0.05522907308588849	0.006;0.792;0.006;0.199	0.006;0.214;0.186;0.596	t|2e1.2o9|2e2.1o4|1e2.1o4|2e3.1o1	FALSE	TRUE	TRUE	4	4	1;0;1;1	15	-	43922930-43927558;43922930-43924397;43922925-43924397;43922930-43923628	43920701-43922930;43923628-43923736;43924397-43924561;43927551-43927614
77	ARFIP1	gene:ENSG00000164144	ENSG00000164144:t:153750746-153750878	-9.63296538650252e-06;-0.381564055647418;-9.63296538650252e-06;0.4128057901018753;-9.63296538650252e-06;-9.63296538650252e-06;-0.0031554483823124507;0.0005416113249587745	3.566003979364276e-06;0.9623311833348543;3.566003979364276e-06;0.9793084459049746;3.566003979364276e-06;3.566003979364276e-06;0.0009581769983151711;7.192038304683832e-05	0.9995273078749003;0.026136452813002364;0.9995273078749003;0.0140334620571228;0.9995273078749003;0.9995273078749003;0.9674788976776493;0.9938965371782	0.002;0.629;0.002;0.316;0.002;0.002;0.043;0.002	0.002;0.239;0.002;0.731;0.002;0.002;0.002;0.020	t|2e1.1o1|2e2.1o18|1e2.6o18|2e2.6o18|2e3.1o1|2e4.1o1|2e5.1o1|2e6.1o1	TRUE	TRUE	TRUE	8	7	1;0;1;0;1;1;1;1	4	+	153700474-153750777;153701243-153750777;153701378-153750746;153701378-153750777;153706124-153750777;153712027-153750777;153728400-153750777;153730885-153750777	153700464-153700474;153701089-153701378;153706019-153706124;153711907-153712027;153728011-153728400;153730342-153730885;153750746-153750878
78	IPP	gene:ENSG00000197429	ENSG00000197429:s:46182567-46182689	0.49893605716542927;-0.5115041910590326;-6.490510683497715e-05;-6.490510683497715e-05;0.0008500077077568379;-6.490510683497715e-05	0.9997039176242367;0.9999771822211044;2.8838173679212204e-05;2.8838173679212204e-05;0.00022136229851414367;2.8838173679212204e-05	0.00014750558428116062;8.780849249601097e-06;0.9984060512079838;0.9984060512079838;0.9890833530634285;0.9984060512079838	0.460;0.527;0.005;0.005;0.005;0.005	0.938;0.025;0.004;0.004;0.025;0.004	s|1e1.2o2|1e1.1o2|1e2.1o2|1e3.1o3|1e4.2o6|1e5.1o2	FALSE	TRUE	TRUE	6	6	0;1;1;1;1;1	1	-	46180138-46182567;46180026-46182567;46177968-46182567;46174702-46182567;46165862-46182567;46160187-46182567	46159996-46160187;46164383-46165862;46174581-46174702;46177726-46177968;46179918-46180138;46182567-46182689
79	RECQL	gene:ENSG00000004700	ENSG00000004700:t:21654104-21654306	-2.5076565592620975e-07;-2.5076565592620975e-07;0.006098290671868234;-2.5076565592620975e-07;-0.26644684198074786;0.01564054880975568;0.2256604282344711;-0.014392890711569677	3.1690539320754076e-09;3.1690539320754076e-09;0.0006423247898460984;3.1690539320754076e-09;0.9733323609039307;0.026550833057592052;0.9552918156922614;0.04735409015286307	0.9999884064110361;0.9999884064110361;0.9376195129326678;0.9999884064110361;0.01047385480086771;0.8260208189757845;0.012609689076500404;0.8196375735375538	0.001;0.001;0.001;0.001;0.382;0.081;0.054;0.477	0.001;0.001;0.051;0.001;0.117;0.130;0.281;0.411	t|1e1.12o12|2e1.9o12|1e1.9o12|2e1.8o12|2e1.4o12|1e1.4o12|1e1.1o12|i	TRUE	TRUE	FALSE	8	2	1;0;0;1;0;0;0;0	12	-	21654149-21654430;21654306-21654415;21654149-21654415;21654306-21654414;21654306-21654397;21654149-21654397;21654149-21654347;21654306-21654307	21654104-21654306;21654307-21654346;21654347-21654603	21654307-21654346
80	RECQL	gene:ENSG00000004700	ENSG00000004700:s:21654347-21654603	-1.0628084418937789e-07;-1.0628084418937789e-07;-0.2575410874835271;-1.0628084418937789e-07;0.006339383015455202;0.022442515104771323;0.23763741156879245;-1.0628084418937789e-07;0.0012689232983179022;-0.0002043243800875059;-1.0628084418937789e-07;-0.027723870210807442	1.906972193088408e-09;1.906972193088408e-09;0.9702761744126447;1.906972193088408e-09;0.0007469936732937;0.05504031614666293;0.9728589048073846;1.906972193088408e-09;4.869901793561304e-05;2.266594109864674e-06;1.906972193088408e-09;0.10192785463715744	0.9999929122715321;0.9999929122715321;0.010905279902065357;0.9999929122715321;0.9351681633072317;0.773005808631826;0.007017029195092666;0.9999929122715321;0.9829623789564049;0.9979024633028142;0.9999929122715321;0.7403023344763546	0.001;0.001;0.380;0.001;0.001;0.082;0.054;0.001;0.019;0.019;0.001;0.447	0.001;0.001;0.123;0.001;0.052;0.149;0.289;0.001;0.035;0.001;0.001;0.351	s|4e1.5o8|3e1.5o8|2e1.5o8|5e1.1o8|4e1.1o8|2e1.1o8|1e1.1o8|4e2.3o8|2e2.3o8|1e2.3o8|2e2.1o8|i	TRUE	TRUE	TRUE	12	3	0;1;0;1;0;0;0;1;0;0;1;0	12	-	21654306-21654415;21654306-21654414;21654306-21654397;21654149-21654430;21654149-21654415;21654149-21654397;21654149-21654347;21652549-21654415;21652549-21654397;21652549-21654347;21652545-21654397;21654346-21654347	21652489-21652549;21654104-21654306;21654307-21654346;21654347-21654603	21654307-21654346
81	ZC3H13	gene:ENSG00000123200	ENSG00000123200:t:46619526-46619678	-2.8410848207721952e-06;0.2507350328619284;-0.015449900663090987;-2.8410848207721952e-06;-2.8410848207721952e-06;-0.14941992895133116;0.009868502427458938;-2.8410848207721952e-06;-0.014573307800759161;0.006493053764428791	3.1508196710190153e-07;0.9947358706314267;0.02993863730509029;3.1508196710190153e-07;3.1508196710190153e-07;0.5566833876627012;0.02105324914439981;3.1508196710190153e-07;0.02718102359677739;0.010132172739231837	0.9998845948223367;0.00023269990052801962;0.8278770373740929;0.9998845948223367;0.9998845948223367;0.3314996993102347;0.856411361766014;0.9998845948223367;0.8349523933058016;0.884402031669495	0.001;0.001;0.135;0.001;0.001;0.520;0.119;0.001;0.129;0.089	0.001;0.268;0.068;0.001;0.001;0.294;0.172;0.001;0.068;0.121	t|3e1.1o7|2e1.1o7|1e1.1o7|2e2.9o9|3e2.2o9|2e2.2o9|1e2.2o9|1e2.1o9|2e3.1o2|1e3.1o2	TRUE	TRUE	TRUE	10	4	1;0;1;1;1;1;0;1;0;1	13	-	46619678-46626833;46619651-46626833;46619648-46626833;46619651-46626738;46619678-46626539;46619651-46626539;46619648-46626539;46619648-46626518;46619651-46626067;46619648-46626067	46619526-46619678;46626067-46626124;46626518-46626820;46626833-46626894
82	TM2D2	gene:ENSG00000169490	ENSG00000169490:s:38853732-38854052	-0.02803650530063421;7.04682162571638e-05;-0.012445260000171784;-0.0003479606291284496;2.698846033509368e-08;2.698846033509368e-08;2.698846033509368e-08;-0.07469408110858032;0.2519738705629216;2.698846033509368e-08	0.05829896562666465;0.0019458583101034906;0.007572952344702844;2.7985351905494667e-07;6.838225006215002e-12;6.838225006215002e-12;6.838225006215002e-12;0.324328902718457;0.955390408792366;6.838225006215002e-12	0.720363815123985;0.9287621558254626;0.8688498541580267;0.995984907715661;0.999999691558601;0.999999691558601;0.999999691558601;0.4092121120842054;0.01967460854433091;0.999999691558601	0.174;0.122;0.087;0.028;0.000;0.000;0.000;0.263;0.318;0.000	0.102;0.123;0.049;0.013;0.001;0.001;0.001;0.142;0.574;0.001	s|2e1.9o11|1e1.9o11|2e1.6o11|1e1.6o11|2e1.4o11|1e1.4o11|3e1.1o11|2e1.1o11|1e1.1o11|1e2.1o2	TRUE	TRUE	TRUE	10	3	0;0;0;1;1;1;1;1;0;1	8	-	38853313-38853938;38853313-38853732;38853212-38853938;38853212-38853732;38852976-38853938;38852976-38853732;38852924-38854020;38852924-38853938;38852924-38853732;38851179-38853732	38851064-38851179;38852835-38853313;38853732-38854052
83	AC091729.9	gene:ENSG00000229043	ENSG00000229043:s:1200010-1200462	4.327396221945876e-06;0.37054400037886803;4.327396221945876e-06;-0.1415783797991802;4.327396221945876e-06;-0.12363976802227875;4.327396221945876e-06;4.327396221945876e-06;4.327396221945876e-06	4.1194195438628976e-07;0.9903958110540168;4.1194195438628976e-07;0.6927687416319634;4.1194195438628976e-07;0.5020463849882275;4.1194195438628976e-07;4.1194195438628976e-07;4.1194195438628976e-07	0.9998727592824815;0.005420683584032522;0.9998727592824815;0.146556725253978;0.9998727592824815;0.36376750837958727;0.9998727592824815;0.9998727592824815;0.9998727592824815	0.001;0.443;0.001;0.208;0.001;0.348;0.001;0.001;0.001	0.002;0.807;0.002;0.031;0.002;0.155;0.002;0.002;0.002	s|1e1.1o1|1e2.1o4|2e2.1o4|1e2.4o4|1e3.1o2|1e4.1o3|1e5.2o5|1e6.1o3|1e7.1o1	TRUE	TRUE	TRUE	9	8	1;0;1;1;1;1;0;0;1	7	+	1200259-1201000;1200259-1201988;1200462-1201988;1200259-1202093;1200259-1202405;1200259-1202598;1200259-1203088;1200259-1203797;1200259-1249369	1200010-1200462;1201000-1201317;1201988-1202179;1202405-1202527;1202598-1202853;1202979-1203131;1203797-1204903;1249369-1249379
84	PHACTR4	gene:ENSG00000204138	ENSG00000204138:s:28696114-28696336	0.36890140625236256;-4.242013122434812e-05;-0.11629478503023181;-0.03683543440993311	0.9540160280199603;9.936738075453374e-05;0.3849936765256089;0.09605692105751518	0.03236994059603901;0.9959965137192723;0.5038273110357442;0.667438222491247	0.073;0.008;0.782;0.137	0.436;0.007;0.543;0.007	s|1e1.1o1|1e2.1o1|1e3.1o5|1e4.1o2	FALSE	FALSE	TRUE	4	5	1;1;0;1	1	+	28696336-28719353;28696336-28724235;28696336-28733921;28696336-28759442	28696114-28696336;28719353-28719452;28724235-28724349;28733921-28733974;28759442-28759557
85	CAPN15	gene:ENSG00000103326	ENSG00000103326:s:586029-586142	-0.00012072851246881904;0.10521955652836629;0.27773127774354445;-0.00012072851246881904;-0.00012072851246881904;-0.47530867397544896;-0.00012072851246881904;-0.00012072851246881904;-0.00012072851246881904	9.549550705832254e-05;0.4542908637223934;0.9611484386804334;9.549550705832254e-05;9.549550705832254e-05;0.9930308913005665;9.549550705832254e-05;9.549550705832254e-05;9.549550705832254e-05	0.9977121296694085;0.29142291488694533;0.01960082790460778;0.9977121296694085;0.9977121296694085;0.005281317527419116;0.9977121296694085;0.9977121296694085;0.9977121296694085	0.005;0.005;0.005;0.005;0.005;0.960;0.005;0.005;0.005	0.003;0.192;0.306;0.003;0.003;0.489;0.003;0.003;0.003	s|2e1.1o3|2e1.2o3|2e2.1o3|2e2.3o3|1e3.1o14|2e3.1o14|2e3.14o14|2e4.1o5|2e5.1o6	TRUE	TRUE	TRUE	9	6	1;1;1;1;1;0;1;1;1	16	+	586142-586637;586142-587134;586142-590093;586142-590145;586091-596817;586142-596817;586142-596899;586142-597559;586142-601302	586029-586142;586637-587229;590093-590378;596817-597392;597559-598287;601302-601427
86	RP11-333E1.1	gene:ENSG00000261879	ENSG00000261879:t:5117221-5117504	-4.687680799126403e-06;0.4811132560244875;-0.018004519075029278;-4.687680799126403e-06;-0.19609510017539547;-4.687680799126403e-06;-4.687680799126403e-06;-0.0021177460586289804;-0.0021177460586289804	4.385792926050639e-05;0.9855969711290024;0.028951036194494194;4.385792926050639e-05;0.5716062166784;4.385792926050639e-05;4.385792926050639e-05;0.0010981919004124584;0.0010981919004124584	0.998273203789529;0.010445964184340477;0.8245336562548512;0.998273203789529;0.3466184707559793;0.998273203789529;0.998273203789529;0.9768774928612073;0.9768774928612073	0.004;0.197;0.100;0.004;0.613;0.004;0.004;0.036;0.036	0.004;0.670;0.004;0.004;0.304;0.004;0.004;0.004;0.004	t|1e1.1o8|2e1.1o8|2e2.1o2|1e3.1o3|2e3.1o3|2e4.1o1|2e5.1o1|2e6.1o1|2e7.1o1	FALSE	TRUE	TRUE	9	8	1;1;1;1;0;1;1;1;1	17	+	5095458-5117221;5095458-5117345;5110360-5117345;5113190-5117221;5113190-5117345;5114426-5117345;5114803-5117345;5115581-5117345;5116511-5117345	nan-5114426;nan-5114803;nan-5115581;5095379-5095458;5110271-5110360;5113045-5113190;5116310-5116511;5117221-5117504
87	NFATC1	gene:ENSG00000131196	ENSG00000131196:t:77170403-77171501	-3.313788817875512e-06;-3.313788817875512e-06;-3.313788817875512e-06;0.6456692402361921;-3.3137640432277007e-06;-3.313788817875512e-06;-3.313788817875512e-06;-0.6313267530465001;-3.3133278226187326e-06;-3.313788817875512e-06;-3.313788817875512e-06;-3.313788817875512e-06;-3.313788817875512e-06;-0.0002205619571441964	7.776912683099137e-08;7.776912683099137e-08;7.776912683099137e-08;0.9999999999999967;7.776912679378019e-08;7.776912683099137e-08;7.776912683099137e-08;0.9999999999999208;7.776912614210487e-08;7.776912683099137e-08;7.776912683099137e-08;7.776912683099137e-08;7.776912683099137e-08;9.834163603195286e-06	0.9999660826712359;0.9999660826712359;0.9999660826712359;7.605585281345132e-17;0.999966082417638;0.9999660826712359;0.9999660826712359;3.885780586188048e-15;0.9999660779523982;0.9999660826712359;0.9999660826712359;0.9999660826712359;0.9999660826712359;0.997742979834179	0.001;0.001;0.001;0.054;0.001;0.001;0.001;0.919;0.001;0.001;0.001;0.001;0.001;0.014	0.000;0.000;0.000;0.688;0.003;0.000;0.000;0.298;0.005;0.000;0.000;0.000;0.000;0.005	t|1e1.1o1|1e2.1o1|1e3.1o1|1e4.1o5|1e5.1o1|1e6.1o1|1e7.1o1|1e8.1o5|1e8.5o5|1e9.1o1|1e10.1o1|1e11.1o1|1e12.1o1|1e13.1o1	TRUE	FALSE	TRUE	14	14	1;1;1;0;1;1;1;0;1;1;1;1;1;1	18	+	77153594-77170403;77154299-77170403;77155131-77170403;77156351-77170403;77158221-77170403;77159655-77170403;77159742-77170403;77160479-77170403;77160483-77170403;77162377-77170403;77163881-77170403;77166000-77170403;77166508-77170403;77166594-77170403	nan-77159655;nan-77159742;nan-77162377;nan-77163881;nan-77166000;nan-77166508;nan-77166594;77153584-77153594;77154289-77154299;77155121-77155131;77155856-77156351;77157984-77158221;77160322-77160483;77170403-77171501
88	LPAR5	gene:ENSG00000184574	ENSG00000184574:t:6728001-6730630	0.00014891218128547712;0.4691344781893347;0.00014891218128547712;-0.31058909862413386;0.00014891218128547712;-0.02519818050706539	0.0001237467839895626;0.9695096396885655;0.0001237467839895626;0.7804948990228466;0.0001237467839895626;0.04611869868723338	0.9967276688664662;0.02285139606540042;0.9967276688664662;0.17516614508734496;0.9967276688664662;0.7526326243145228	0.004;0.215;0.004;0.662;0.004;0.110	0.008;0.689;0.008;0.280;0.008;0.008	t|1e1.1o1|1e2.1o3|1e3.1o1|1e4.1o1|1e5.1o1|1e6.1o1	FALSE	FALSE	TRUE	6	7	1;0;1;0;1;1	12	-	6730630-6748120;6730630-6745073;6730630-6741519;6730630-6740751;6730630-6735842;6730630-6733182	6728001-6730630;6733182-nan;6735842-nan;6740751-6740837;6741519-nan;6745073-6745613;6748120-6748130
89	CCNYL1	gene:ENSG00000163249	ENSG00000163249:t:208602135-208602170	-0.00041070802883816967;-0.4031241138386695;-0.00041070802883816967;0.41403262788680295	0.00023637692371471648;0.9576424120920459;0.00023637692371471648;0.9588982325931437	0.9951108608320126;0.02894717791037449;0.9951108608320126;0.02867478799315972	0.012;0.500;0.012;0.487	0.004;0.087;0.004;0.906	t|1e1.1o5|1e2.1o3|1e3.1o4|1e3.2o4	TRUE	FALSE	TRUE	4	4	1;0;1;0	2	+	208576840-208602135;208591600-208602135;208598769-208602135;208598771-208602135	208576410-208576840;208591566-208591600;208598671-208598771;208602135-208602170
90	RP11-35G9.5	gene:ENSG00000267787	ENSG00000267787:t:55404994-55405276	-0.47434045889242715;4.586812803640252e-06;0.09690166264300776;4.586812803640252e-06;0.20801948607187182;4.586812803640252e-06;4.586812803640252e-06	0.9993482127228148;1.6729971815235816e-05;0.40610692773341683;1.6729971815235816e-05;0.644954382995624;1.6729971815235816e-05;1.6729971815235816e-05	0.00036569451706869316;0.9988337416967527;0.29929026243968276;0.9988337416967527;0.2781513101556622;0.9988337416967527;0.9988337416967527	0.521;0.003;0.003;0.003;0.470;0.003;0.003	0.054;0.004;0.176;0.004;0.757;0.004;0.004	t|1e1.1o21|1e2.1o1|1e3.1o5|1e4.1o8|1e4.2o8|1e4.8o8|1e5.1o1	TRUE	FALSE	TRUE	7	6	1;1;1;1;0;1;0	18	+	55309284-55404994;55313576-55404994;55399255-55404994;55402724-55404994;55402824-55404994;55402836-55404994;55404323-55404994	nan-55313576;55308791-55309284;55398646-55399255;55402383-55402836;55403878-55404323;55404994-55405276
91	PCGF3	gene:ENSG00000185619	ENSG00000185619:s:727461-727578	0.00938891789730022;-3.098006027387431e-05;-3.098006027387431e-05;-3.098006027387431e-05;0.26923846686865816;-0.35693481006507316	0.03985060403112051;4.079091242026789e-06;4.079091242026789e-06;4.079091242026789e-06;0.8684664077260316;0.9921609456785057	0.8346360140992639;0.9994517104182108;0.9994517104182108;0.9994517104182108;0.09053070591403532;0.0038046767480108823	0.363;0.003;0.003;0.003;0.185;0.440	0.423;0.002;0.002;0.002;0.485;0.088	s|1e1.1o2|1e2.1o3|1e2.2o3|1e2.3o3|1e3.1o2|i	FALSE	TRUE	TRUE	6	4	0;1;1;1;0;0	4	+	727578-727673;727578-728510;727578-728556;727578-728579;727578-728720;727578-727579	727461-727578;727579-727672;727673-728268;728510-728605;728720-728816	727579-727672
92	RP11-35G9.3	gene:ENSG00000267040	ENSG00000267040:t:55404994-55405276	-0.4588474811265093;3.51241142574622e-06;0.09833728966074784;3.51241142574622e-06;0.16274804582421326;3.51241142574622e-06	0.9991707271069111;1.9275809037754034e-05;0.4145248753456593;1.9275809037754034e-05;0.5340174505073684;1.9275809037754034e-05	0.00045343033407529987;0.998631656018648;0.2954952913539847;0.998631656018648;0.3698246788998702;0.998631656018648	0.504;0.004;0.004;0.004;0.487;0.004	0.054;0.004;0.178;0.004;0.754;0.004	t|1e1.1o23|1e2.1o1|1e3.1o5|1e4.1o7|1e4.2o7|1e4.7o7	TRUE	FALSE	TRUE	6	5	1;1;1;1;0;1	18	+	55309284-55404994;55313576-55404994;55399255-55404994;55402724-55404994;55402824-55404994;55402836-55404994	nan-55313576;55308791-55309284;55398646-55399255;55402383-55402836;55404994-55405276
93	WAPAL	gene:ENSG00000062650	ENSG00000062650:s:88233635-88233730	-0.28982671282026107;0.2898267128202626	0.9710165730079039;0.9710165730079039	0.01419763947767938;0.014197639477679444	0.840;0.160	0.548;0.452	s|1e1.1o1|1e2.1o2	FALSE	FALSE	TRUE	2	3	0;1	10	-	88232521-88233635;88232101-88233635	88231965-88232101;88232369-88232521;88233635-88233730
94	FUT8	gene:ENSG00000033170	ENSG00000033170:s:66096210-66096324	-2.54354296633683e-07;-2.54354296633683e-07;0.17048963837664788;0.00034150384359936625;1.2227451330640807e-05;-2.54354296633683e-07;-2.54354296633683e-07;0.019463532128992652;0.00034150384359936625;-2.54354296633683e-07;-0.3026852674697089;-2.54354296633683e-07;-3.2289590173239226e-05	1.986253593283991e-09;1.986253593283991e-09;0.9037396765118104;3.4816366631844943e-06;3.810838806971557e-08;1.986253593283991e-09;1.986253593283991e-09;0.007201792982090929;3.4816366631844943e-06;1.986253593283991e-09;0.999514638131471;1.986253593283991e-09;2.740345934244921e-07	0.999994733380717;0.999994733380717;0.014201814548837826;0.996496357305503;0.9998669561108916;0.999994733380717;0.999994733380717;0.8015304889971488;0.996496357305503;0.999994733380717;5.974068586356296e-05;0.999994733380717;0.9996667997637192	0.001;0.001;0.018;0.001;0.001;0.001;0.001;0.001;0.001;0.001;0.966;0.001;0.009	0.001;0.001;0.204;0.023;0.008;0.001;0.001;0.070;0.023;0.001;0.669;0.001;0.001	s|2e1.1o1|2e2.1o1|2e3.1o3|2e3.2o3|2e3.3o3|2e4.1o1|2e5.1o1|2e6.1o1|2e7.1o1|2e8.1o1|2e9.1o10|1e10.1o7|2e10.1o7	TRUE	TRUE	TRUE	13	11	1;1;1;1;1;1;1;1;1;1;0;1;1	14	+	66096324-66097071;66096324-66097721;66096324-66099743;66096324-66099856;66096324-66100104;66096324-66106804;66096324-66112678;66096324-66113238;66096324-66120600;66096324-66129842;66096324-66135961;66096256-66188493;66096324-66188493	66096210-66096324;66097071-nan;66097721-nan;66099743-66100520;66106804-66107018;66112678-66112835;66113238-66113316;66120600-66120761;66129842-66129906;66135961-66136198;66188493-66188739
95	NUDT2	gene:ENSG00000164978	ENSG00000164978:t:34338711-34338845	0.2712106154656849;1.055821394674054e-06;-0.002466448412716647;-0.0002182220302934521;-0.17841485494674714;0.002636140250986411;-0.008897456984094635;1.055821394674054e-06	0.9932299638629543;6.523747590470138e-09;8.756197762362353e-05;1.0559888632724626e-06;0.7564297417577811;0.00018817527324835705;0.0008315423978858793;6.523747590470138e-09	0.0013015535204918278;0.9999869529581968;0.9685121897561222;0.9977422939616353;0.13934756909060642;0.9730289342607139;0.9089721702658616;0.9999869529581968	0.069;0.001;0.041;0.021;0.810;0.001;0.055;0.001	0.335;0.001;0.021;0.001;0.599;0.040;0.001;0.001	t|1e1.1o10|2e1.1o10|1e2.1o4|1e3.1o1|1e4.1o5|3e4.1o5|1e4.5o5|1e5.1o1	TRUE	TRUE	TRUE	8	6	0;1;1;1;0;1;1;1	9	+	34329597-34338711;34329597-34338712;34330970-34338711;34332765-34338711;34336339-34338711;34336339-34338771;34336682-34338711;34338137-34338711	nan-34332765;34329504-34329597;34330814-34330970;34336216-34336682;34338024-34338137;34338711-34338845
96	NUDT2	gene:ENSG00000164978	ENSG00000164978:s:34329504-34329597	-4.028600907160917e-05;-4.028600907160917e-05;-0.5165419480041918;-4.028600907160917e-05;0.5272315739240775;-4.028600907160917e-05;-4.028600907160917e-05;-4.028600907160917e-05;-4.028600907160917e-05;-4.028600907160917e-05	2.4439677326932223e-05;2.4439677326932223e-05;0.9969633232363405;2.4439677326932223e-05;0.9973829352460789;2.4439677326932223e-05;2.4439677326932223e-05;2.4439677326932223e-05;2.4439677326932223e-05;2.4439677326932223e-05	0.9988568155251096;0.9988568155251096;0.0020259117542752447;0.9988568155251096;0.0017572658331267573;0.9988568155251096;0.9988568155251096;0.9988568155251096;0.9988568155251096;0.9988568155251096	0.003;0.003;0.654;0.003;0.316;0.003;0.003;0.003;0.003;0.003	0.002;0.002;0.151;0.002;0.830;0.002;0.002;0.002;0.002;0.002	s|1e1.1o1|1e2.1o5|1e2.2o5|1e2.4o5|1e3.1o8|1e3.7o8|1e4.1o5|1e5.1o3|1e6.1o2|1e7.1o1	FALSE	TRUE	TRUE	10	8	1;1;0;0;0;1;1;1;1;1	9	+	34329597-34330814;34329597-34336216;34329597-34336227;34329597-34336298;34329597-34338711;34329597-34338712;34329597-34339022;34329597-34343122;34329597-34416835;34329597-34437287	34329504-34329597;34330814-34330970;34336216-34336682;34338711-34338845;34339022-34339164;34343122-34343709;34416835-34416845;34437287-34437297
97	RASSF1	gene:ENSG00000068028	ENSG00000068028:t:50369481-50369616	7.880059411058525e-11;-6.132191976825018e-08;7.880059411058525e-11;7.880059411058525e-11;-0.24791887138748198;7.880059411058525e-11;0.23273071478927815;7.880059411058525e-11;7.880059411058525e-11;0.00017129074139961582;7.880059411058525e-11;7.880059411058525e-11	6.980483302198778e-15;6.212214771377803e-13;6.980483302198778e-15;6.980483302198778e-15;0.9721975289614582;6.980483302198778e-15;0.9506001572969328;6.980483302198778e-15;6.980483302198778e-15;8.747966345803887e-08;6.980483302198778e-15;6.980483302198778e-15	0.9999999911198693;0.9999993625300586;0.9999999911198693;0.9999999911198693;0.00954158239680869;0.9999999911198693;0.019721405907729566;0.9999999911198693;0.9999999911198693;0.9982311488458675;0.9999999911198693;0.9999999911198693	0.000;0.004;0.000;0.000;0.391;0.000;0.591;0.000;0.000;0.009;0.000;0.000	0.000;0.000;0.000;0.000;0.150;0.000;0.819;0.000;0.000;0.025;0.000;0.000	t|2e1.1o1|2e2.2o6|2e3.12o12|3e3.1o12|2e3.1o12|3e4.2o10|2e4.2o10|1e4.2o10|2e4.1o10|2e5.1o1|2e6.1o1|2e7.1o1	TRUE	TRUE	TRUE	12	8	1;1;1;1;0;1;0;1;1;1;1;1	3	-	50369585-50379241;50369585-50377987;50369585-50375339;50369616-50375336;50369585-50375336;50369616-50374604;50369585-50374604;50369584-50374604;50369585-50374449;50369585-50374191;50369585-50371244;50369585-50369956	50369481-50369616;50369956-50370054;50371244-50371359;50374191-50374419;50374449-50375209;50375336-50375454;50377872-50378343;50379241-50379251
98	MIER1	gene:ENSG00000198160	ENSG00000198160:s:67391825-67391925	-0.009976629978301798;-0.33804558406874374;0.004288671780646445;-0.00017958279473763488;0.4254219589835825	0.012049953269494748;0.8801653774179148;0.013189445529379553;8.016959301535301e-05;0.9638789114862618	0.9010140756146142;0.08986324347855124;0.876837809524655;0.9972607037669801;0.026626132442675126	0.081;0.571;0.081;0.007;0.262	0.004;0.200;0.102;0.004;0.690	s|1e1.1o1|1e2.1o3|1e2.2o3|1e2.3o3|1e3.1o8	FALSE	TRUE	TRUE	5	4	1;0;0;1;0	1	+	67391925-67392017;67391925-67394570;67391925-67394573;67391925-67394612;67391925-67405711	67391825-67391925;67392017-nan;67394570-67394646;67405711-67405735
99	RPP14	gene:ENSG00000163684	ENSG00000163684:t:58296234-58296318	-7.070071763280074e-08;-7.070071763280074e-08;0.1220791487684155;0.06985045238321494;-0.28181848422584294	1.3997908133106782e-10;1.3997908133106782e-10;0.5807250924593644;0.2886738649126177;0.9585291068666845	0.9999972453618705;0.9999972453618705;0.2148735331291003;0.557351596420874;0.020064596354568587	0.001;0.001;0.089;0.358;0.550	0.001;0.001;0.241;0.489;0.259	t|1e1.1o1|1e2.1o1|1e3.1o9|1e3.5o9|1e4.1o1	TRUE	FALSE	TRUE	5	5	1;1;1;1;0	3	+	58271180-58296234;58286047-58296234;58292144-58296234;58292378-58296234;58296133-58296234	58271170-58271180;58286037-58286047;58291989-58292378;58296017-58296133;58296234-58296318
100	STAMBP	gene:ENSG00000124356	ENSG00000124356:t:74057972-74058186	-1.7731029738538292e-05;-0.370242803840628;0.13296193696518613;-1.7731029738538292e-05;-1.7731029738538292e-05;-1.7731029738538292e-05;-1.7731029738538292e-05;0.09340450741237674;-1.7731029738538292e-05;-1.7731029738538292e-05	2.6141296285804916e-06;0.9698562605489709;0.6631886116437307;2.6141296285804916e-06;2.6141296285804916e-06;2.6141296285804916e-06;2.6141296285804916e-06;0.3594376580710529;2.6141296285804916e-06;2.6141296285804916e-06	0.999675641440376;0.020105688436041214;0.10434067311871251;0.999675641440376;0.999675641440376;0.999675641440376;0.999675641440376;0.5021539896589113;0.999675641440376;0.999675641440376	0.002;0.820;0.002;0.002;0.002;0.002;0.002;0.169;0.002;0.002	0.001;0.448;0.181;0.001;0.001;0.001;0.001;0.355;0.001;0.001	t|1e1.1o2|1e2.1o3|1e3.1o9|1e3.4o9|1e3.5o9|1e3.8o9|1e4.1o3|1e4.2o3|1e4.3o3|1e5.1o1	TRUE	FALSE	TRUE	10	6	1;0;0;1;1;1;1;0;1;1	2	+	74055981-74057972;74056123-74057972;74056197-74057972;74056372-74057972;74056376-74057972;74056438-74057972;74056565-74057972;74056637-74057972;74056965-74057972;74057860-74057972	nan-74057860;74055971-74055981;74056086-74056123;74056127-74056438;74056532-74056965;74057972-74058186
101	POMT1	gene:ENSG00000130714	ENSG00000130714:t:134386946-134387523	0.40697988150884057;-2.8417148727379136e-05;-2.8417148727379136e-05;-0.3994075198145517;-2.8417148727379136e-05	0.9924381017449004;3.969024958173734e-06;3.969024958173734e-06;0.9891872610445562;3.969024958173734e-06	0.00453546263032134;0.9994032789531603;0.9994032789531603;0.006785164450573644;0.9994032789531603	0.473;0.004;0.004;0.513;0.004	0.872;0.003;0.003;0.119;0.003	t|3e1.1o5|1e1.2o5|2e1.2o5|3e1.2o5|4e1.2o5	TRUE	TRUE	FALSE	5	2	0;1;1;0;1	9	+	134386854-134387428;134386859-134386946;134386859-134386962;134386859-134387428;134386859-134387435	134386724-134386859;134386946-134387523

## Sheet: 8hr CD3 Donor 2
8hr CD3 AS Events - Donor 2
	X.Gene.Name	Gene.ID	LSV.ID	E.dPSI..per.LSV.junction	P..dPSI...0.10..per.LSV.junction	P..dPSI...0.05..per.LSV.junction	ND523.8hr.Unstim.E.PSI.	ND523.8hr.CD3.E.PSI.	LSV.Type	A5SS	A3SS	ES	Num..Junctions	Num..Exons	De.Novo.Junctions	chr	strand	Junctions.coords	Exons.coords	IR.coords
1	RP11-752G15.6	gene:ENSG00000250988	ENSG00000250988:s:83423381-83423789	1.842912212187201e-05;-0.4868224059208145;0.4846072538217427;1.842912212187201e-05	0.00010558739736984927;0.9860323880306818;0.9835127908261339;0.00010558739736984927	0.9958941140969038;0.01021529715073155;0.012142089117346946;0.9958941140969038	0.007;0.713;0.272;0.007	0.008;0.234;0.750;0.008	s|1e1.1o2|1e1.2o2|1e2.1o2|1e3.1o1	FALSE	TRUE	TRUE	4	4	1;0;0;1	15	+	83423536-83425053;83423536-83425482;83423536-83425656;83423536-83449631	83423381-83423789;83425053-83425537;83425656-83425691;83449631-83449641
2	ZNF721	gene:ENSG00000182903	ENSG00000182903:s:466364-466499	-1.5474596452931862e-07;-0.012834979245874109;-1.5474596452931862e-07;0.0035348756009712457;-0.17365927306385956;-1.5474596452931862e-07;-2.0566067834921053e-05;0.34359286878089235;-1.5474596452931862e-07;-1.5474596452931862e-07;-1.5474596452931862e-07;-0.017282109517173162;-2.0566067834921053e-05;0.0002969000153483796;-0.010383145972417868;-1.5474596452931862e-07;-1.5474596452931862e-07	3.1538088037048674e-10;0.012634005477013769;3.1538088037048674e-10;0.0004239634774997359;0.7727298561703526;3.1538088037048674e-10;7.433416700121616e-08;0.9986698208812352;3.1538088037048674e-10;3.1538088037048674e-10;3.1538088037048674e-10;0.024264050852609492;7.433416700121616e-08;9.383934848857996e-07;0.00179243498223817;3.1538088037048674e-10;3.1538088037048674e-10	0.9999981183651907;0.8583964021172683;0.9999981183651907;0.9235902075374951;0.12119642024442057;0.9999981183651907;0.999789164350367;0.0003692701744291923;0.9999981183651907;0.9999981183651907;0.9999981183651907;0.8138193109386864;0.999789164350367;0.9969571251376099;0.8938836658591518;0.9999981183651907;0.9999981183651907	0.000;0.088;0.000;0.043;0.336;0.000;0.009;0.304;0.000;0.000;0.000;0.144;0.009;0.000;0.058;0.000;0.000	0.000;0.050;0.000;0.056;0.142;0.000;0.000;0.634;0.000;0.000;0.000;0.087;0.000;0.025;0.000;0.000;0.000	s|1e1.1o1|1e2.1o1|1e3.1o1|1e4.1o1|1e5.1o2|1e6.1o1|1e7.1o1|1e8.1o10|1e9.1o5|1e10.1o1|1e11.7o7|1e11.1o7|1e12.1o3|1e13.4o7|1e13.1o7|1e14.1o1|1e15.1o1	FALSE	TRUE	TRUE	17	16	1;1;1;1;1;1;1;0;1;1;1;1;1;1;1;1;1	4	-	464784-466364;464780-466364;462741-466364;461470-466364;450157-466364;448876-466364;444422-466364;438221-466364;432421-466364;431869-466364;431341-466364;431300-466364;429668-466364;420908-466364;420762-466364;402782-466364;363847-466364	nan-444422;nan-448876;nan-450157;nan-464780;nan-464784;363837-363847;402772-402782;420578-420908;429559-429668;431235-431341;431730-431869;432249-432421;433777-438221;461261-461470;462544-462741;466364-466499
3	ELF1	gene:ENSG00000120690	ENSG00000120690:t:41556119-41556418	0.027000406940328358;-2.9027453507635654e-08;-2.9027453507635654e-08;-2.9027453507635654e-08;-2.9027453507635654e-08;-0.2071120124233199;-2.9027453507635654e-08;-2.9027453507635654e-08;-0.04514183924952384;-0.0026476080485610307;-2.9027453507635654e-08;-2.9027453507635654e-08;-0.007197528514506093;-2.9027453507635654e-08;-2.9027453507635654e-08;0.3014528662075998;-2.9027453507635654e-08	0.06093509577455487;1.082217561779164e-11;1.082217561779164e-11;1.082217561779164e-11;1.082217561779164e-11;0.8913757948979114;1.082217561779164e-11;1.082217561779164e-11;0.04295609620155239;6.90867135018e-05;1.082217561779164e-11;1.082217561779164e-11;0.0004858013155896017;1.082217561779164e-11;1.082217561779164e-11;0.9935910342643482;1.082217561779164e-11	0.7298698834105893;0.9999997018260839;0.9999997018260839;0.9999997018260839;0.9999997018260839;0.04724721969023282;0.9999997018260839;0.9999997018260839;0.5429356695275493;0.9717555095786725;0.9999997018260839;0.9999997018260839;0.9263609176607546;0.9999997018260839;0.9999997018260839;0.00179547311829274;0.9999997018260839	0.141;0.000;0.000;0.000;0.000;0.410;0.000;0.000;0.090;0.040;0.000;0.000;0.051;0.000;0.000;0.258;0.000	0.213;0.000;0.000;0.000;0.000;0.197;0.000;0.000;0.008;0.022;0.000;0.000;0.000;0.000;0.000;0.552;0.000	t|1e1.1o10|1e2.1o1|1e3.1o1|1e4.1o1|1e5.1o1|1e6.1o10|1e7.1o2|1e8.1o1|1e9.1o1|1e10.1o1|1e11.1o1|1e12.1o1|1e13.1o1|1e14.1o1|1e15.1o1|1e16.1o1|1e17.1o1	FALSE	FALSE	TRUE	17	18	0;1;1;1;1;0;1;1;1;1;1;1;1;1;1;1;1	13	-	41556418-41634974;41556418-41634781;41556418-41626698;41556418-41601032;41556418-41594849;41556418-41593364;41556418-41591638;41556418-41588486;41556418-41588295;41556418-41587214;41556418-41580066;41556418-41572174;41556418-41571625;41556418-41567020;41556418-41557260;41556418-41556994;41556418-41556842	41556119-41556418;41556842-nan;41556994-nan;41557260-nan;41567020-41567367;41571625-nan;41572174-41572255;41580066-nan;41587214-41587330;41588295-41588485;41588486-41588561;41591638-41591919;41593364-41593568;41594849-41594954;41601032-nan;41626698-41626844;41634781-41634791;41634974-41635576
4	FKBP2	gene:ENSG00000173486	ENSG00000173486:s:64008628-64009133	-4.94358792002934e-05;-4.94358792002934e-05;0.7493473975541466;-0.0011772549417144865;-0.1927045317075828;-0.48148457246116017;-4.94358792002934e-05	6.041212671939758e-06;6.041212671939758e-06;0.9999999999999398;0.00027272076251860116;0.8673013066890951;0.9999983160312208;6.041212671939758e-06	0.9994883289872779;0.9994883289872779;7.905000774819702e-15;0.9879803388989346;0.035277014330021506;1.7108938532572893e-07;0.9994883289872779	0.003;0.003;0.231;0.026;0.231;0.503;0.003	0.001;0.001;0.958;0.001;0.008;0.029;0.001	s|1e1.3o4|1e2.1o21|1e2.4o21|2e2.4o21|3e2.4o21|4e2.4o21|1e2.19o21	TRUE	TRUE	TRUE	7	3	1;1;0;1;1;1;1	11	+	64008710-64009667;64008710-64009829;64008710-64009856;64009006-64009856;64009115-64009856;64009133-64009856;64008710-64009891	64008628-64009133;64009138-64009685;64009829-64010116
5	AMBRA1	gene:ENSG00000110497	ENSG00000110497:s:46564688-46564948	-0.42004763852934857;-4.648849268209504e-05;0.002762940036783069;-4.648849268209504e-05;0.3838839162450767	0.9978750786776696;1.572826699801591e-05;0.0007895066366964875;1.572826699801591e-05;0.9952901730018184	0.0011698173319244498;0.9986787206176186;0.9700857006834505;0.9986787206176186;0.002569600729813766	0.935;0.005;0.005;0.005;0.050	0.517;0.004;0.042;0.004;0.436	s|3e1.2o6|2e1.2o6|1e1.2o6|3e1.1o6|i	TRUE	TRUE	FALSE	5	2	0;1;1;1;0	11	-	46564531-46564802;46564531-46564799;46564531-46564688;46564504-46564802;46564687-46564688	46563495-46564531;46564532-46564687;46564688-46564948	46564532-46564687
6	ATAD3B	gene:ENSG00000160072	ENSG00000160072:s:1412654-1412730	-9.325617426335977e-05;-0.5975876206845961;0.6841523228733797;-9.325617426335977e-05;-0.012615336208128911	1.4805374781644576e-05;0.9999905521379526;0.9999999811971845;1.4805374781644576e-05;0.012443651210464398	0.999041100524282;4.45924281933241e-06;6.378271319728551e-09;0.999041100524282;0.8739175452718945	0.005;0.807;0.104;0.005;0.079	0.001;0.226;0.770;0.001;0.001	s|1e1.1o2|1e1.2o2|1e2.1o6|1e3.1o4|1e4.1o1	FALSE	TRUE	TRUE	5	5	1;1;0;1;1	1	+	1412730-1413054;1412730-1413131;1412730-1414024;1412730-1414429;1412730-1526683	1412654-1412730;1413054-1413731;1414024-1414125;1414429-1414488;1526683-1526693
7	ZNF75A	gene:ENSG00000162086	ENSG00000162086:s:3362677-3362768	-0.3428896241940242;4.753136519870544e-05;4.753136519870544e-05;0.2541422078146555;0.026289394196865667;4.753136519870544e-05;-0.0030828510638109957;4.753136519870544e-05;4.753136519870544e-05;4.753136519870544e-05	0.9544377347017222;9.032624784387639e-06;9.032624784387639e-06;0.8626475913340472;0.0512840039086104;9.032624784387639e-06;0.00032347559432520866;9.032624784387639e-06;9.032624784387639e-06;9.032624784387639e-06	0.028529535737808365;0.999488070262098;0.999488070262098;0.08132447511537352;0.7490790576256156;0.999488070262098;0.9675019972496142;0.999488070262098;0.999488070262098;0.999488070262098	0.879;0.001;0.001;0.061;0.011;0.001;0.042;0.001;0.001;0.001	0.531;0.003;0.003;0.344;0.111;0.003;0.003;0.003;0.003;0.003	s|1e1.1o2|1e1.2o2|1e2.3o4|1e3.1o7|1e4.1o11|1e4.9o11|1e5.1o3|1e5.3o3|1e6.1o2|1e6.2o2	FALSE	TRUE	TRUE	10	7	0;1;1;1;1;1;1;1;1;1	16	+	3362768-3363049;3362768-3363091;3362768-3366551;3362768-3366912;3362768-3367190;3362768-3367247;3362768-3372915;3362768-3372920;3362768-3405895;3362768-3405898	3362677-3362768;3363049-3363175;3366507-3366634;3366912-3367022;3367190-3368852;3372915-3372930;3405895-3405908
8	SBNO2	gene:ENSG00000064932	ENSG00000064932:t:1127603-1127764	-2.586559715922381e-06;-0.7615199663477681;-2.586559715922381e-06;-2.586559715922381e-06;-2.586559715922381e-06;0.7687325126285595;-2.586559715922381e-06;-2.586559715922381e-06;-2.586559715922381e-06;-2.586559715922381e-06	4.073912348475465e-08;0.9999999999999997;4.073912348475465e-08;4.073912348475465e-08;4.073912348475465e-08;0.9999999999999999;4.073912348475465e-08;4.073912348475465e-08;4.073912348475465e-08;4.073912348475465e-08	0.9999735239831202;1.1102230246251565e-16;0.9999735239831202;0.9999735239831202;0.9999735239831202;2.5964005284795403e-17;0.9999735239831202;0.9999735239831202;0.9999735239831202;0.9999735239831202	0.001;0.871;0.001;0.001;0.001;0.118;0.001;0.001;0.001;0.001	0.000;0.130;0.000;0.000;0.000;0.868;0.000;0.000;0.000;0.000	t|2e1.1o6|2e2.1o3|2e3.1o1|2e4.1o1|2e5.1o1|2e6.1o3|1e6.1o3|2e7.1o1|2e8.1o1|2e9.1o1	FALSE	TRUE	TRUE	10	10	1;0;1;1;1;0;1;1;1;1	19	-	1127764-1174171;1127764-1147308;1127764-1143708;1127764-1143107;1127764-1140864;1127764-1132089;1127746-1132089;1127764-1131850;1127764-1130373;1127764-1129141	1127603-1127764;1129141-nan;1130373-nan;1131850-1131915;1132089-1132220;1140864-nan;1143107-nan;1143708-1143923;1147308-1147419;1174171-1174282
9	ANKMY1	gene:ENSG00000144504	ENSG00000144504:t:241465102-241465266	7.26595359834126e-05;0.07652490425013836;-0.06119361294879701;7.26595359834126e-05;0.323840039399854;7.26595359834126e-05;-0.2569674470151156;7.26595359834126e-05	3.172442110603931e-05;0.2878640308554082;0.22353783455009835;3.172442110603931e-05;0.9763103404511229;3.172442110603931e-05;0.7514053644193283;3.172442110603931e-05	0.9986531050111741;0.4322477692827931;0.646797490819933;0.9986531050111741;0.010992517271317233;0.9986531050111741;0.1927706908445217;0.9986531050111741	0.003;0.003;0.437;0.003;0.023;0.003;0.539;0.003	0.004;0.177;0.246;0.004;0.350;0.004;0.211;0.004	t|1e1.3o5|1e2.1o7|1e3.1o10|1e4.6o7|1e4.3o7|1e4.1o7|1e5.2o2|1e5.1o2	TRUE	FALSE	TRUE	8	6	1;1;0;1;0;1;0;1	2	-	241465266-241500453;241465266-241500148;241465266-241492331;241465266-241468631;241465266-241468454;241465266-241468068;241465266-241465646;241465266-241465544	241465102-241465266;241465544-241465862;241468068-241468926;241492331-241492474;241500148-241500243;241500345-241500527
10	DDX39A	gene:ENSG00000123136	ENSG00000123136:t:14521028-14521146	-7.884450523018525e-16;0.25317335583329703;-0.15248773366865184;-7.884450523018525e-16;-0.07980785091703262	1.5985594605881518e-18;0.9970174113945475;0.9059032711858455;1.5985594605881518e-18;0.3217129398960519	0.999999999999984;4.951994412266043e-06;0.006343852480820589;0.999999999999984;0.2899489991582297	0.000;0.661;0.179;0.000;0.158	0.000;0.912;0.030;0.000;0.057	t|1e1.4o4|1e1.1o4|1e2.3o3|1e2.2o3|1e2.1o3	TRUE	FALSE	TRUE	5	3	1;0;1;1;1	19	-	14521146-14521802;14521146-14521801;14521146-14521360;14521146-14521256;14521146-14521233	14521028-14521146;14521233-14521453;14521801-14521984
11	DDX39A	gene:ENSG00000123136	ENSG00000123136:s:14521801-14521984	2.2186799962498135e-16;-0.27195403710839244;2.2186799962498135e-16;0.27264370778655245	1.5985594605879753e-18;0.9997838866397702;1.5985594605879753e-18;0.9997953200389272	0.9999999999999943;3.798571103441617e-06;0.9999999999999943;3.734140712642344e-06	0.000;0.361;0.000;0.637	0.000;0.096;0.000;0.904	s|1e1.2o2|1e1.1o2|2e2.1o5|1e2.1o5	TRUE	TRUE	TRUE	4	3	1;1;1;0	19	-	14521453-14521801;14521417-14521801;14521146-14521802;14521146-14521801	14521028-14521146;14521233-14521453;14521801-14521984
12	AMN1	gene:ENSG00000151743	ENSG00000151743:t:31862227-31862359	-0.024687758433547605;-0.08682149887066998;-3.310957513838302e-05;-3.310957513838302e-05;0.3388582276936037;-0.001416692279743107;-3.310957513838302e-05	0.040899905551369325;0.322395215824746;1.2758896377450902e-05;1.2758896377450902e-05;0.9797403120748083;0.00042854489752460167;1.2758896377450902e-05	0.7597138678527839;0.5450457566258854;0.9990183832301851;0.9990183832301851;0.011924202505370636;0.9849321065170533;0.9990183832301851	0.104;0.804;0.004;0.004;0.054;0.029;0.004	0.003;0.597;0.003;0.003;0.389;0.003;0.003	t|1e1.6o8|1e1.1o8|1e2.1o1|1e3.1o4|1e4.1o3|1e5.1o2|1e6.1o1	TRUE	FALSE	TRUE	7	7	0;0;1;1;0;0;1	12	-	31862359-31881925;31862359-31881905;31862359-31881719;31862359-31872152;31862359-31867816;31862359-31867375;31862359-31863582	31862227-31862359;31863582-nan;31867375-31867565;31867816-31867885;31872152-31872290;31881719-31881729;31881905-31882108
13	FOXN3	gene:ENSG00000053254	ENSG00000053254:t:89878541-89878836	-0.006039980370399865;-2.3032622502688712e-06;-0.306901157574979;-2.3032622502688712e-06;-0.005978475996723589;-0.006073024458970154;-2.3032622502688712e-06;-2.3032622502688712e-06;-2.3032622502688712e-06;-2.3032622502688712e-06;0.4447345518305496;-2.3032622502688712e-06	0.006921740070461446;6.566940298942942e-08;0.96235251794665;6.566940298942942e-08;0.0013669795803639684;0.0013760504337033178;6.566940298942942e-08;6.566940298942942e-08;6.566940298942942e-08;6.566940298942942e-08;0.9999955258063735;6.566940298942942e-08	0.9032010603813412;0.9999580833025727;0.021069997066536228;0.9999580833025727;0.9377998120527565;0.9379718796079872;0.9999580833025727;0.9999580833025727;0.9999580833025727;0.9999580833025727;7.718072928770618e-07;0.9999580833025727	0.104;0.001;0.702;0.001;0.053;0.053;0.001;0.001;0.001;0.001;0.080;0.001	0.073;0.001;0.397;0.001;0.011;0.001;0.001;0.001;0.001;0.001;0.506;0.001	t|1e1.1o20|1e2.1o3|1e3.1o11|1e4.1o1|1e5.1o1|1e6.1o1|1e7.1o1|1e8.1o1|1e9.1o1|1e10.1o1|1e11.1o1|1e12.1o1	FALSE	FALSE	TRUE	12	13	0;1;0;1;1;1;1;1;1;1;0;1	14	-	89878834-90085372;89878834-90047713;89878834-89952913;89878834-89939879;89878834-89937618;89878834-89919418;89878834-89916759;89878834-89915364;89878834-89905080;89878834-89884850;89878834-89883215;89878834-89881248	89878541-89878836;89881248-nan;89883215-89883552;89884850-nan;89905080-nan;89915364-89915432;89916759-nan;89919418-89919514;89937618-89937752;89939879-89940065;89952913-89953015;90047713-90047819;90085372-90085493
14	TUBGCP6	gene:ENSG00000128159	ENSG00000128159:s:50660457-50660531	-0.27469923497620247;0.2755503428179475;1.1770989023768115e-07	0.9954887328996834;0.9956541228971448;6.820546206339316e-11	0.0008047035852020157;0.0007237246333133687;0.9999974540250188	0.929;0.069;0.002	0.658;0.343;0.002	s|1e1.2o2|1e2.1o9|1e3.1o1	FALSE	FALSE	TRUE	3	4	0;1;1	22	-	50660303-50660457;50658444-50660457;50543803-50660457	50543793-50543803;50658386-50658444;50658621-50660303;50660457-50660531
15	LIG4	gene:ENSG00000174405	ENSG00000174405:t:108859787-108863648	-0.6663048627484927;-0.000139589427727057;-0.000139589427727057;-0.000139589427727057;0.005791273176545693;0.6541596598251866;-0.000139589427727057	0.9999921985584889;0.00022559143750316507;0.00022559143750316507;0.00022559143750316507;0.03267700759046387;0.9986400830533592;0.00022559143750316507	4.21571688924427e-06;0.9955770830610282;0.9955770830610282;0.9955770830610282;0.8454336556412564;0.0010090565242551848;0.9955770830610282	0.675;0.008;0.008;0.008;0.119;0.175;0.008	0.005;0.005;0.005;0.005;0.159;0.813;0.005	t|2e1.1o7|1e1.1o7|2e2.2o2|3e2.1o2|2e3.3o3|2e3.1o3|1e3.1o3	TRUE	TRUE	TRUE	7	4	0;1;1;0;1;0;1	13	-	108863644-108870510;108863564-108870510;108863644-108867832;108863648-108867791;108863644-108866910;108863644-108866886;108863564-108866886	108859787-108863648;108866886-108867130;108867791-108868188;108870510-108870716
16	PTP4A3	gene:ENSG00000184489	ENSG00000184489:t:142431488-142431710	2.0589288560069562e-06;2.0589288560069562e-06;-0.3412307068264584;2.0589288560069562e-06;2.0589288560069562e-06;2.0589288560069562e-06;2.0589288560069562e-06;2.0589288560069562e-06;0.06166749706729041;2.0589288560069562e-06;2.0589288560069562e-06;-0.000364793740385429;2.0589288560069562e-06;2.0589288560069562e-06;0.011970368809877004;2.0589288560069562e-06;2.0589288560069562e-06;2.058928856006956…	6.507066419033729e-07;6.507066419033729e-07;0.9896309191872195;6.507066419033729e-07;6.507066419033729e-07;6.507066419033729e-07;6.507066419033729e-07;6.507066419033729e-07;0.24218824736032493;6.507066419033729e-07;6.507066419033729e-07;3.4618339774214826e-05;6.507066419033729e-07;6.507066419033729e-07;0.00855140074963289;6.507066419033729e-07;6.507066419033729e-07;6.507066419033729e-07;6.5070664…	0.9998864259433026;0.9998864259433026;0.0050774852304098506;0.9998864259433026;0.9998864259433026;0.9998864259433026;0.9998864259433026;0.9998864259433026;0.5023266901988862;0.9998864259433026;0.9998864259433026;0.996135413170129;0.9998864259433026;0.9998864259433026;0.8789767498917054;0.9998864259433026;0.9998864259433026;0.9998864259433026;0.9998864259433026;0.3619868721048256	0.001;0.001;0.936;0.001;0.001;0.001;0.001;0.001;0.033;0.001;0.001;0.017;0.001;0.001;0.001;0.001;0.001;0.001;0.001;0.001	0.001;0.001;0.611;0.001;0.001;0.001;0.001;0.001;0.159;0.001;0.001;0.001;0.001;0.001;0.071;0.001;0.001;0.001;0.001;0.141	t|1e1.1o1|1e2.1o1|1e3.1o10|1e3.9o10|1e3.10o10|1e4.1o1|1e5.1o1|1e6.1o1|1e7.1o1|1e8.1o1|1e9.1o1|1e10.1o1|1e11.1o1|1e12.1o1|1e13.1o2|1e14.1o1|1e15.1o1|1e16.1o1|1e17.1o1|1e18.1o1	TRUE	FALSE	TRUE	20	19	1;1;0;1;1;1;1;1;1;1;1;1;1;1;1;1;1;1;1;1	8	+	142236937-142431488;142398978-142431488;142402184-142431488;142402434-142431488;142402763-142431488;142412028-142431488;142414396-142431488;142415918-142431488;142418261-142431488;142424072-142431488;142425202-142431488;142425696-142431488;142426639-142431488;142427457-142431488;142428118-142431488;142428122-142431488;142428131-142431488;142428553-142431488;142428564-142431488;142431096-142431488	nan-142412028;nan-142414396;nan-142424072;nan-142425202;nan-142425696;nan-142426639;nan-142427457;nan-142428118;nan-142428122;nan-142428131;nan-142428553;nan-142428564;nan-142431096;142236927-142236937;142398968-142398978;142402093-142402763;142415684-142415918;142418077-142418261;142431488-142431710
17	CBY1	gene:ENSG00000100211	ENSG00000100211:t:39066772-39066994	1.720402411788741e-05;1.720402411788741e-05;1.720402411788741e-05;-0.00012712147638405601;1.720402411788741e-05;1.720402411788741e-05;0.3928352243208712;1.720402411788741e-05;1.720402411788741e-05;-0.38355671469924535	1.305380237949784e-06;1.305380237949784e-06;1.305380237949784e-06;2.4508700224858128e-06;1.305380237949784e-06;1.305380237949784e-06;0.9917867660054458;1.305380237949784e-06;1.305380237949784e-06;0.9867741568912022	0.9998177122971323;0.9998177122971323;0.9998177122971323;0.9983410722353305;0.9998177122971323;0.9998177122971323;0.004610688202143612;0.9998177122971323;0.9998177122971323;0.007804565121984797	0.001;0.001;0.001;0.017;0.001;0.001;0.289;0.001;0.001;0.687	0.002;0.002;0.002;0.002;0.002;0.002;0.678;0.002;0.002;0.309	t|1e1.2o13|4e1.2o13|4e2.1o9|1e3.1o4|4e3.1o4|4e4.1o5|1e4.2o5|2e4.2o5|3e4.2o5|4e4.2o5	TRUE	TRUE	TRUE	10	5	1;1;1;1;1;1;1;1;1;0	22	+	39052755-39066772;39052755-39066889;39053148-39066889;39061690-39066772;39061690-39066889;39064136-39066889;39064137-39066772;39064137-39066790;39064137-39066875;39064137-39066889	39052645-39052755;39052961-39053605;39061317-39061690;39064022-39064137;39066772-39066994
18	SNX29	gene:ENSG00000048471	ENSG00000048471:s:12223487-12223615	0.6004897322156973;0.00017257640095196092;-0.6175738938022503;0.00017257640095196092;0.00017257640095196092	0.9972595031335953;0.0003254311521719588;0.9968376668046851;0.0003254311521719588;0.0003254311521719588	0.001986842344087059;0.9937556519605193;0.0023601663352526003;0.9937556519605193;0.9937556519605193	0.081;0.007;0.896;0.007;0.007	0.678;0.011;0.289;0.011;0.011	s|2e1.1o2|1e2.1o4|2e2.1o4|2e2.4o4|2e3.1o3	TRUE	TRUE	TRUE	5	4	0;1;0;1;1	16	+	12223615-12229408;12223598-12293458;12223615-12293458;12223615-12293460;12223615-12371790	12223487-12223615;12229408-12229594;12293458-12293540;12371790-12371893
19	TOP3A	gene:ENSG00000177302	ENSG00000177302:s:18198017-18198099	0.2725550235413491;-7.95255539113007e-05;-0.2297142039487639;-0.0014410701667281055;-7.95255539113007e-05	0.9638137236308502;1.2690407996323018e-05;0.9166027800010266;0.00039535796317271556;1.2690407996323018e-05	0.014828825924455502;0.9990312305919844;0.03341976774307742;0.9851540525946286;0.9990312305919844	0.688;0.005;0.273;0.029;0.005	0.966;0.002;0.027;0.002;0.002	s|1e1.1o2|1e2.4o4|1e2.1o4|1e3.1o7|1e4.2o5	FALSE	TRUE	TRUE	5	5	0;1;0;1;1	17	-	18196166-18198017;18194608-18198017;18194341-18198017;18188834-18198017;18186155-18198017	18186012-18186155;18188721-18188940;18194156-18194608;18195959-18196166;18198017-18198099
20	WDR27	gene:ENSG00000184465	ENSG00000184465:s:170058372-170058454	0.00023321250202913154;-0.38217639870251;0.00023321250202913154;0.00023321250202913154;0.00023321250202913154;0.00023321250202913154;0.2773621171265553;0.00023321250202913154;0.00023321250202913154;0.00023321250202913154	0.0002616083690600552;0.9831822720745351;0.0002616083690600552;0.0002616083690600552;0.0002616083690600552;0.0002616083690600552;0.7444126429819536;0.0002616083690600552;0.0002616083690600552;0.0002616083690600552	0.9966665575820945;0.013142412454309804;0.9966665575820945;0.9966665575820945;0.9966665575820945;0.9966665575820945;0.2090356032111773;0.9966665575820945;0.9966665575820945;0.9966665575820945	0.003;0.408;0.003;0.003;0.003;0.003;0.572;0.003;0.003;0.003	0.008;0.008;0.008;0.008;0.008;0.008;0.925;0.008;0.008;0.008	s|1e1.3o3|1e1.2o3|1e1.1o3|1e2.1o1|1e3.2o2|1e3.1o2|1e4.1o5|1e5.1o3|1e6.1o6|1e7.2o9	FALSE	TRUE	TRUE	10	8	1;1;1;1;1;1;0;1;1;1	6	-	170058201-170058372;170058142-170058372;170058097-170058372;170057703-170058372;170055507-170058372;170055364-170058372;170052104-170058372;170049371-170058372;170038756-170058372;170034621-170058372	nan-170057703;170034524-170034621;170038635-170038756;170049294-170049371;170052026-170052104;170054617-170055507;170058062-170058201;170058372-170058454
[truncated: 186 more rows]

## Sheet: 8hr CD3 Donor 3
8hr CD3 AS Events - Donor 3
[truncated: 195 more rows]

## Sheet: 8hr CD3CD28 Donor 1
8hr CD3CD28 AS Events - Donor 1
[truncated: 138 more rows]

## Sheet: 8hr CD3CD28 Donor 2
8hr CD3CD28 AS Events - Donor 2
[truncated: 208 more rows]

## Sheet: 8hr CD3CD28 Donor 3
8hr CD3CD28 AS Events - Donor 3
[truncated: 207 more rows]

## Sheet: 48hr CD28 Donor 1
48hr CD28 AS Events - Donor 1
[truncated: 290 more rows]

[truncated: 8 more sheets: 48hr CD28 Donor 2, 48hr CD28 Donor 3, 48hr CD3 Donor 1, 48hr CD3 Donor 2, 48hr CD3 Donor 3, 48hr CD3CD28 Donor 1, 48hr CD3CD28 Donor 2, 48hr CD3CD28 Donor 3]
