# Supplementary material for: Alternative splicing of apoptosis genes promotes human T cell survival
Source: eLife. 2022 Oct 20;11:e80953. doi: 10.7554/eLife.80953 (PMC9625086; doi:10.7554/eLife.80953)
Supplement: Supplementary file 3. [file elife-80953-supp3.xlsx]

## Sheet: Sheet 1
			Donor 1			Donor 2			Donor 3
	lsvids	genes	CD3CD28_dpsi_8hr_Donor 1	CD3CD28_dpsi_48hr_Donor 1	Category_Donor 1	CD3CD28_dpsi_8hr_Donor 2	CD3CD28_dpsi_48hr_Donor 2	Category_Donor 2	CD3CD28_dpsi_8hr_Donor 3	CD3CD28_dpsi_48hr_Donor 3	Category
1	gene:ENSG00000001631:t:91871348-91871475	KRIT1	-0.221059	0.00478319	Early/transient	-0.409371	-0.672934	Early/Sustained	0.0609969	-0.336962	Late_change
2	gene:ENSG00000002016:s:1036311-1036429	RAD52	0.0344568	0.0773608	Late_change	NA	NA	NA	-0.00520991	0.378634	Late_change
3	gene:ENSG00000003400:s:202060565-202060671	CASP10	-0.0173912	0.0471666	Late_change	-3.46e-06	0.276446	Late_change	0.0463808	0.297725	Late_change
4	gene:ENSG00000003400:t:202072798-202072906	CASP10	-0.118739	0.00107673	Early/transient	6.16e-05	0.581281	Late_change	0.076269	0.499386	Late_change
5	gene:ENSG00000005302:s:11777899-11778458	MSL3	-0.0257484	0.220502	Late_change	-0.00393576	0.242576	Late_change	0.07811	0.167423	Late_change
6	gene:ENSG00000005302:t:11777899-11778458	MSL3	-0.0493339	-0.492214	Late_change	-0.0253374	-0.283915	Late_change	-0.234702	-0.406471	Early/Sustained
7	gene:ENSG00000005801:s:3400268-3400448	ZNF195	0.00457501	-0.322038	Late_change	-0.144746	-0.370172	Early/Sustained	-0.335077	-0.0944513	Early/transient
8	gene:ENSG00000007129:t:42070998-42071410	CEACAM21	0.0130604	-0.323349	Late_change	0.000882787	-0.23775	Late_change	-0.106852	-0.392488	Early/Sustained
9	gene:ENSG00000007341:s:113153463-113153625	ST7L	-0.0892202	-0.411925	Late_change	NA	NA	NA	NA	NA	NA
10	gene:ENSG00000007392:s:270644-270746	LUC7L	0.1251	0.385022	Early/Sustained	0.312891	0.417948	Early/Sustained	0.333327	0.248865	Early/Sustained
11	gene:ENSG00000007392:s:279278-279462	LUC7L	-0.0716312	-0.821277	Late_change	-0.298762	-0.853818	Early/Sustained	-0.343047	-0.638476	Early/Sustained
12	gene:ENSG00000007392:t:258077-258193	LUC7L	-0.055937	-0.448108	Late_change	-0.363557	-0.431862	Early/Sustained	-0.369948	-0.364849	Early/Sustained
13	gene:ENSG00000007392:t:277241-277685	LUC7L	0.251564	0.787624	Early/Sustained	NA	NA	NA	0.531865	0.621206	Early/Sustained
14	gene:ENSG00000009790:t:209946293-209946364	TRAF3IP3	-0.0463563	0.517691	Late_change	-0.0376272	0.476489	Late_change	0.00699214	0.584795	Late_change
15	gene:ENSG00000013364:t:29847025-29847119	MVP	0.0339432	0.212422	Late_change	0.00425802	0.31756	Late_change	0.240799	0.313828	Early/Sustained
16	gene:ENSG00000015133:s:91755449-91755687	CCDC88C	-0.0107396	-0.225284	Late_change	0.00482637	-0.480502	Late_change	-0.00782785	-0.308967	Late_change
17	gene:ENSG00000015171:t:282778-282855	ZMYND11	0.0246714	0.00471274	Late_change	0.00173658	0.510342	Late_change	-0.00176859	0.384151	Late_change
18	gene:ENSG00000016864:t:52734461-52734673	GLT8D1	0.033339	0.3764	Late_change	0.00544759	0.317811	Late_change	0.0233026	0.398553	Late_change
19	gene:ENSG00000017260:s:130612812-130613181	ATP2C1	0.0681979	0.286364	Late_change	NA	NA	NA	0.0105697	-0.0225887	Late_change
20	gene:ENSG00000029363:s:136589300-136589484	BCLAF1	0.00905767	-0.346492	Late_change	-0.0998642	-0.284097	Late_change	-0.204798	-0.0996951	Early/transient
21	gene:ENSG00000029363:s:136590575-136590750	BCLAF1	-0.0760617	0.281621	Late_change	0.200715	0.305928	Early/Sustained	0.136049	0.361687	Early/Sustained
22	gene:ENSG00000029363:t:136582403-136582615	BCLAF1	-0.0089063	0.282873	Late_change	0.0563053	0.253233	Late_change	0.215933	0.082465	Early/transient
23	gene:ENSG00000029363:t:136589300-136589484	BCLAF1	-0.0829571	0.286845	Late_change	NA	NA	NA	0.0659159	0.286843	Late_change
24	gene:ENSG00000035115:t:253001-253115	SH3YL1	-0.0488405	-0.338138	Late_change	-0.238347	-0.362964	Early/Sustained	NA	NA	NA
25	gene:ENSG00000037757:s:13876768-13876943	MRI1	0.074714	0.436301	Late_change	-0.00876644	0.526036	Late_change	0.0185751	0.248847	Late_change
26	gene:ENSG00000037757:t:13879375-13879551	MRI1	0.0282208	0.341042	Late_change	-0.0331565	0.325323	Late_change	NA	NA	NA
27	gene:ENSG00000040341:s:74585342-74585477	STAU2	-0.0239295	-0.297086	Late_change	-0.359819	-0.249495	Early/Sustained	-0.00577972	-0.417229	Late_change
28	gene:ENSG00000044090:s:43014618-43014845	CUL7	0.00418611	0.383416	Late_change	NA	NA	NA	NA	NA	NA
29	gene:ENSG00000047188:s:112850969-112851059	YTHDC2	-0.073571	0.312732	Late_change	-0.0542534	0.848629	Late_change	0.290449	0.555147	Early/Sustained
30	gene:ENSG00000048740:t:11312629-11312787	CELF2	-0.0482519	-0.304204	Late_change	-0.00237888	-0.0873324	Late_change	-0.191004	-0.251687	Early/Sustained
31	gene:ENSG00000050426:t:51447561-51447643	LETMD1	0.203518	-0.358696	Early/transient	-0.00165016	-0.289702	Late_change	0.0207802	-0.0332908	Late_change
32	gene:ENSG00000050748:s:179718848-179719099	MAPK9	-0.237702	-0.448345	Early/Sustained	-0.484664	-0.302593	Early/Sustained	-0.215764	-0.14801	Early/Sustained
33	gene:ENSG00000050748:t:179707440-179707608	MAPK9	0.302108	0.46503	Early/Sustained	0.473216	0.345626	Early/Sustained	0.167181	0.165306	Early/Sustained
34	gene:ENSG00000051596:t:175394114-175394270	THOC3	0.00928375	0.078336	Late_change	0.0860411	0.370824	Late_change	0.0397828	0.42115	Late_change
35	gene:ENSG00000053254:t:89878541-89878836	FOXN3	0.0770139	0.258088	Late_change	0.354939	0.471375	Early/Sustained	0.372857	0.2835	Early/Sustained
36	gene:ENSG00000053900:t:25379040-25379178	ANAPC4	-0.0211275	-0.274116	Late_change	-0.00965694	-0.300791	Late_change	-0.0188139	0.00285922	Late_change
37	gene:ENSG00000054219:s:160761100-160761221	LY75	0.243308	-0.329752	Early/transient	-0.265985	-0.509398	Early/Sustained	-0.0326178	-0.220587	Late_change
38	gene:ENSG00000055483:s:76794467-76794816	USP36	0.15184	0.130873	Early/Sustained	0.032712	0.36188	Late_change	0.0649847	0.267424	Late_change
39	gene:ENSG00000055483:t:76791320-76794043	USP36	0.173579	0.190822	Early/Sustained	NA	NA	NA	0.0435564	0.253859	Late_change
40	gene:ENSG00000055917:t:20462954-20463235	PUM2	0.018095	0.293044	Late_change	0.0967979	0.243491	Late_change	0.142471	0.383938	Early/Sustained
41	gene:ENSG00000058673:s:203764782-203764922	ZC3H11A	-0.134527	-0.24439	Early/Sustained	-0.0476328	-0.10505	Late_change	-0.0402628	-0.316945	Late_change
42	gene:ENSG00000058673:t:203768463-203770767	ZC3H11A	-0.103323	-0.246593	Early/Sustained	-0.21491	-0.0388648	Early/transient	-0.030915	-0.372984	Late_change
43	gene:ENSG00000059145:t:1421520-1421612	UNKL	0.00989585	-0.658025	Late_change	0.00794667	-0.535758	Late_change	0.00704403	-0.789516	Late_change
44	gene:ENSG00000059378:s:139757636-139757834	PARP12	-0.137437	-0.390055	Early/Sustained	0.0273095	-0.347032	Late_change	-0.257895	-0.426075	Early/Sustained
45	gene:ENSG00000059769:s:114393632-114394023	DNAJC25	0.0139023	0.463449	Late_change	NA	NA	NA	NA	NA	NA
46	gene:ENSG00000059769:t:114409387-114409539	DNAJC25	-0.00465489	0.407293	Late_change	0.0138899	0.602289	Late_change	0.0807823	0.0420994	Late_change
47	gene:ENSG00000060339:s:70515127-70515293	CCAR1	-0.202119	-0.354549	Early/Sustained	-0.0529094	-0.297055	Late_change	-0.0261154	-0.339766	Late_change
48	gene:ENSG00000060339:t:70517051-70517134	CCAR1	0.0391345	0.26265	Late_change	0.028372	0.15576	Late_change	0.034438	0.364706	Late_change
49	gene:ENSG00000060642:t:27117250-27117384	PIGV	-0.011747	0.401976	Late_change	0.0710724	0.1741	Late_change	-0.0286025	0.486095	Late_change
50	gene:ENSG00000060971:s:38168001-38168221	ACAA1	-0.00996216	-0.270078	Late_change	-0.0169891	-0.317462	Late_change	-0.0084343	-0.352804	Late_change
51	gene:ENSG00000060971:t:38170781-38170879	ACAA1	0.00717511	0.241013	Late_change	0.00403187	0.204463	Late_change	-0.0240911	0.352334	Late_change
52	gene:ENSG00000061987:t:62960102-62960230	MON2	0.0212314	0.382108	Late_change	-0.0957016	0.300236	Late_change	0.0305909	0.347316	Late_change
53	gene:ENSG00000064547:t:19738206-19738313	LPAR2	0.0126702	0.425384	Late_change	-0.0596326	-0.50749	Late_change	0.0647955	-0.00251405	Late_change
54	gene:ENSG00000064607:s:19105175-19105295	SUGP2	0.0096893	-0.238646	Late_change	0.00394357	-0.211075	Late_change	0.00157984	-0.0805243	Late_change
55	gene:ENSG00000064932:t:1127603-1127764	SBNO2	0.551245	0.282803	Early/Sustained	0.72862	0.750661	Early/Sustained	0.49745	0.0511261	Early/transient
56	gene:ENSG00000065882:t:38016130-38016594	TBC1D1	-0.224574	-0.511735	Early/Sustained	0.00326394	-0.747813	Late_change	-0.628645	-0.666164	Early/Sustained
57	gene:ENSG00000066651:s:126329433-126329618	TRMT11	-0.0485366	0.476995	Late_change	0.0034842	0.261461	Late_change	-0.0222413	-0.000435356	Late_change
58	gene:ENSG00000068354:s:48399673-48399901	TBC1D25	-0.002342	-0.0169545	Late_change	0.11955	-0.415511	Early/transient	-0.0140694	-0.327725	Late_change
59	gene:ENSG00000068354:t:48417285-48417414	TBC1D25	0.0126996	-0.0946148	Late_change	-0.0138401	-0.294627	Late_change	-0.00714982	-0.216213	Late_change
60	gene:ENSG00000068745:t:48730881-48731673	IP6K2	0.228906	-0.138447	Early/transient	-0.0548881	-0.375062	Late_change	0.00115848	-0.386412	Late_change
61	gene:ENSG00000068784:s:45773871-45773978	SRBD1	0.00382611	0.0411048	Late_change	-0.00892855	0.534839	Late_change	0.00122694	0.513187	Late_change
62	gene:ENSG00000068784:t:45704132-45704214	SRBD1	0.00175432	0.0501361	Late_change	0.00144874	0.62379	Late_change	-0.163472	0.496252	Early/transient
63	gene:ENSG00000069998:t:17621949-17622151	CECR5	0.00271273	-0.204681	Late_change	-0.0736395	-0.105305	Late_change	-0.227032	-0.212107	Early/Sustained
64	gene:ENSG00000070081:t:17304336-17304490	NUCB2	0.00473479	-0.242834	Late_change	-0.00785987	-0.170181	Late_change	-0.0977078	-0.238252	Late_change
65	gene:ENSG00000071243:s:120595613-120595678	ING3	0.0123994	0.0382512	Late_change	0.00511989	0.323888	Late_change	0.00519923	0.257234	Late_change
66	gene:ENSG00000071564:s:1615284-1615519	TCF3	-0.0683619	0.149174	Late_change	-0.0387397	0.273484	Late_change	0.0601566	0.242711	Late_change
67	gene:ENSG00000072310:t:17723404-17723835	SREBF1	-0.0126458	0.1482	Late_change	-0.0447797	0.373149	Late_change	NA	NA	NA
68	gene:ENSG00000073169:t:50644746-50644949	SELO	-0.194756	0.124332	Early/transient	-0.0135201	0.452519	Late_change	0.0344753	0.280354	Late_change
69	gene:ENSG00000074054:s:122204913-122205083	CLASP1	0.266428	0.686269	Early/Sustained	-0.00485272	0.789309	Late_change	-0.0207471	0.639165	Late_change
70	gene:ENSG00000074054:t:122187649-122187753	CLASP1	0.277524	0.618601	Early/Sustained	0.00159506	0.809118	Late_change	-0.0224692	0.673544	Late_change
71	gene:ENSG00000074603:t:65746601-65746753	DPP8	-0.0944344	0.322805	Late_change	0.00904102	0.0262349	Late_change	0.0377754	0.38037	Late_change
72	gene:ENSG00000077044:t:234343026-234343130	DGKD	0.00595037	0.514679	Late_change	0.00427221	0.140236	Late_change	0.115294	0.563303	Early/Sustained
73	gene:ENSG00000077254:s:78225328-78225374	USP33	-0.0142593	0.000169198	Late_change	-0.0489633	-0.400663	Late_change	-0.0216444	-0.347393	Late_change
74	gene:ENSG00000077458:s:95512771-95512851	FAM76B	-0.0147165	-0.432819	Late_change	-0.152371	-0.246167	Early/Sustained	-0.12309	-0.029865	Early/transient
75	gene:ENSG00000078304:s:102276140-102276373	PPP2R5C	0.141419	0.05952	Early/transient	0.0328732	0.286807	Late_change	0.0142883	0.329653	Late_change
76	gene:ENSG00000078699:s:32077893-32078107	CBFA2T2	-0.00384624	-0.488571	Late_change	-0.0839084	-0.357061	Late_change	NA	NA	NA
77	gene:ENSG00000080503:t:2028987-2029247	SMARCA2	-0.013074	-0.603879	Late_change	NA	NA	NA	0.0268807	-0.573855	Late_change
78	gene:ENSG00000081154:s:101292939-101293123	PCNP	0.100823	0.196294	Early/Sustained	0.134687	0.293142	Early/Sustained	0.113609	0.352135	Early/Sustained
79	gene:ENSG00000081154:t:101298616-101298848	PCNP	0.0780784	0.199276	Late_change	0.0491733	0.261845	Late_change	0.124065	0.335103	Early/Sustained
80	gene:ENSG00000081721:s:161719560-161720114	DUSP12	0.0139449	0.517785	Late_change	0.021802	0.310888	Late_change	0.0488484	0.145576	Late_change
81	gene:ENSG00000081721:t:161721445-161721571	DUSP12	0.015513	0.508085	Late_change	0.0159524	0.302371	Late_change	0.0452241	0.17496	Late_change
82	gene:ENSG00000083457:s:3626982-3627038	ITGAE	-0.00890387	-0.265205	Late_change	0.00576409	-0.304923	Late_change	0.0504217	-0.373816	Late_change
83	gene:ENSG00000083457:t:3623601-3623696	ITGAE	-0.00280491	0.217046	Late_change	-0.0166697	0.275617	Late_change	0.0283407	0.363081	Late_change
84	gene:ENSG00000083520:t:73354626-73355141	DIS3	-0.0142947	0.248492	Late_change	0.0146315	0.493	Late_change	0.0247725	0.136919	Late_change
85	gene:ENSG00000083799:s:50775961-50776131	CYLD	0.0100612	-0.230661	Late_change	0.0148343	-0.0263221	Late_change	0.00909458	-0.254336	Late_change
86	gene:ENSG00000083799:t:50776671-50776752	CYLD	-0.00399676	-0.343777	Late_change	-0.0136087	-0.213761	Late_change	0.00777438	-0.36634	Late_change
87	gene:ENSG00000083838:t:58988546-58988927	ZNF446	-0.00853059	-0.67014	Late_change	0.093013	-0.505265	Late_change	0.174424	-0.376901	Early/transient
88	gene:ENSG00000084112:t:109212025-109212089	SSH1	0.00272015	-0.487645	Late_change	NA	NA	NA	NA	NA	NA
89	gene:ENSG00000085231:s:68662330-68662648	TAF9	-0.0215928	-0.329282	Late_change	0.0299041	-0.291815	Late_change	-0.0230633	-0.25787	Late_change
90	gene:ENSG00000087087:t:100481691-100481860	SRRT	0.14545	0.250552	Early/Sustained	0.341653	0.222584	Early/Sustained	NA	NA	NA
91	gene:ENSG00000087111:t:26898067-26898206	PIGS	-0.0142824	-0.299378	Late_change	0.0327065	-0.226198	Late_change	-0.0508882	-0.30403	Late_change
92	gene:ENSG00000088448:s:111558380-111558471	ANKRD10	0.00615931	-0.0252722	Late_change	-0.167261	-0.244265	Early/Sustained	-0.233383	-0.370117	Early/Sustained
93	gene:ENSG00000088543:s:50604882-50605182	C3orf18	-0.123177	-0.204336	Early/Sustained	-0.353405	-0.45998	Early/Sustained	NA	NA	NA
94	gene:ENSG00000089009:s:112847123-112847378	RPL6	0.0748554	-0.322253	Late_change	-0.0151402	-0.221777	Late_change	-0.335348	-0.470775	Early/Sustained
95	gene:ENSG00000089009:t:112846224-112846756	RPL6	-0.00570954	-0.429977	Late_change	-0.189891	-0.400994	Early/Sustained	-0.120038	-0.293885	Early/Sustained
96	gene:ENSG00000089053:s:121769030-121769242	ANAPC5	0.0439158	0.183553	Late_change	0.0357746	0.179736	Late_change	0.0653418	0.119337	Late_change
97	gene:ENSG00000089094:t:121890923-121891147	KDM2B	-0.107881	0.345876	Early/transient	0.0572238	0.458653	Late_change	0.172641	0.236501	Early/Sustained
98	gene:ENSG00000089094:t:121972402-121972565	KDM2B	-0.00713253	-0.445785	Late_change	0.000216687	-0.440945	Late_change	-0.185824	-0.491219	Early/Sustained
99	gene:ENSG00000089248:s:112451120-112451413	ERP29	-0.0374997	-0.242941	Late_change	-0.130704	-0.244404	Early/Sustained	-0.158393	-0.20345	Early/Sustained
100	gene:ENSG00000089248:t:112459954-112461255	ERP29	-0.0456456	-0.225729	Late_change	-0.116429	-0.242811	Early/Sustained	-0.138657	-0.208715	Early/Sustained
101	gene:ENSG00000090006:s:41127836-41128572	LTBP4	-0.0375544	-0.321458	Late_change	-0.109108	-0.274266	Early/Sustained	-0.0782518	-0.117492	Late_change
102	gene:ENSG00000090554:s:49982166-49982304	FLT3LG	-0.052486	-0.247017	Late_change	-0.117204	-0.218567	Early/Sustained	-0.0495641	-0.0207848	Late_change
103	gene:ENSG00000090554:t:49983809-49984838	FLT3LG	-0.083747	-0.250188	Late_change	-0.112976	-0.220538	Early/Sustained	-0.025098	-0.0153244	Late_change
104	gene:ENSG00000090863:s:74487069-74487260	GLG1	0.0639053	0.238976	Late_change	0.194359	0.0922564	Early/transient	0.233625	0.235148	Early/Sustained
105	gene:ENSG00000091527:s:133305404-133305704	CDV3	0.00721823	0.208035	Late_change	-0.0561102	0.149102	Late_change	-0.0149711	0.230884	Late_change
106	gene:ENSG00000092094:s:20917061-20917172	OSGEP	-0.0360818	0.212564	Late_change	0.0840653	0.310833	Late_change	0.208331	0.321651	Early/Sustained
107	gene:ENSG00000092094:s:20917330-20919038	OSGEP	-0.0104026	0.326486	Late_change	-0.0104908	0.222238	Late_change	0.0937153	0.344375	Late_change
108	gene:ENSG00000092094:t:20917061-20917172	OSGEP	0.0499198	0.25609	Late_change	0.0463725	0.292185	Late_change	0.193786	0.372356	Early/Sustained
109	gene:ENSG00000093167:s:37136283-37136399	LRRFIP2	-0.000709198	-0.500263	Late_change	-0.341891	-0.218442	Early/Sustained	-0.493336	-0.316567	Early/Sustained
110	gene:ENSG00000093167:t:37125127-37125297	LRRFIP2	-0.0153154	-0.46759	Late_change	NA	NA	NA	-0.494883	-0.336508	Early/Sustained
111	gene:ENSG00000093183:s:42597422-42597487	SEC22C	0.100995	0.300054	Early/Sustained	0.398072	0.328962	Early/Sustained	0.482136	0.284646	Early/Sustained
112	gene:ENSG00000094631:t:48661070-48661192	HDAC6	-0.0232836	-0.314898	Late_change	-0.0697714	-0.437695	Late_change	NA	NA	NA
113	gene:ENSG00000095485:s:102021736-102022091	CWF19L1	0.00302162	0.103634	Late_change	0.0147607	0.262201	Late_change	0.174629	0.215998	Early/Sustained
114	gene:ENSG00000096996:s:18182922-18183248	IL12RB1	0.0930594	0.161688	Late_change	-0.0325809	0.307689	Late_change	0.0105074	0.350572	Late_change
115	gene:ENSG00000099284:t:71853491-71853601	H2AFY2	-0.0222051	-0.906365	Late_change	-0.0480816	-0.646036	Late_change	NA	NA	NA
116	gene:ENSG00000099622:s:1271980-1272050	CIRBP	0.0778355	0.329999	Late_change	0.201866	0.259769	Early/Sustained	0.3261	0.410727	Early/Sustained
117	gene:ENSG00000099991:t:24560368-24560623	CABIN1	0.0232677	0.534864	Late_change	0.0248669	0.420407	Late_change	0.0718015	0.559142	Late_change
118	gene:ENSG00000100151:t:38465040-38465129	PICK1	0.124895	0.27154	Early/Sustained	0.0159078	0.321356	Late_change	0.0449472	0.101089	Late_change
119	gene:ENSG00000100201:t:38883878-38884219	DDX17	0.0836463	0.31106	Late_change	0.16511	0.358013	Early/Sustained	0.143252	0.129268	Early/Sustained
120	gene:ENSG00000100225:s:32871224-32871456	FBXO7	-0.053804	-0.489407	Late_change	-0.0834018	-0.380383	Late_change	NA	NA	NA
121	gene:ENSG00000100227:s:42998776-42999166	POLDIP3	0.0034757	-0.192602	Late_change	0.0124054	-0.16541	Late_change	NA	NA	NA
122	gene:ENSG00000100241:s:50897684-50897839	SBF1	0.00645697	0.303544	Late_change	NA	NA	NA	-0.035736	0.312495	Late_change
123	gene:ENSG00000100266:s:43275054-43275175	PACSIN2	0.0928802	0.290706	Late_change	0.129197	0.132168	Early/Sustained	0.307922	0.297935	Early/Sustained
124	gene:ENSG00000100266:t:43272139-43272339	PACSIN2	0.000151037	0.281227	Late_change	0.229565	0.116995	Early/Sustained	0.268686	0.239148	Early/Sustained
125	gene:ENSG00000100351:t:40342821-40343188	GRAP2	0.0111956	-0.15315	Late_change	-0.0302925	-0.288809	Late_change	-0.0109981	-0.190561	Late_change
126	gene:ENSG00000100354:t:40642019-40642106	TNRC6B	0.0119137	-0.637409	Late_change	-0.0951493	-0.311901	Late_change	0.000130625	-0.452591	Late_change
127	gene:ENSG00000100416:s:46742319-46742445	TRMU	0.122998	0.608155	Early/Sustained	0.392696	0.583128	Early/Sustained	-0.00227123	0.505805	Late_change
128	gene:ENSG00000100416:t:46746179-46746360	TRMU	0.115576	0.598523	Early/Sustained	0.353399	0.585514	Early/Sustained	0.0023587	0.486207	Late_change
129	gene:ENSG00000100429:s:50689399-50689814	HDAC10	-0.0756256	-0.500581	Late_change	-0.121352	-0.348546	Early/Sustained	-0.0206208	-0.39805	Late_change
130	gene:ENSG00000100614:t:60749402-60750255	PPM1A	-0.0611788	-0.264359	Late_change	-0.358223	-0.131634	Early/transient	-0.0183933	-0.242314	Late_change
131	gene:ENSG00000100726:s:1555931-1556330	TELO2	0.00493011	0.223269	Late_change	0.0055759	0.292676	Late_change	0.397922	0.101555	Early/transient
132	gene:ENSG00000100813:t:23535175-23535310	ACIN1	0.196521	0.290728	Early/Sustained	0.158998	0.301822	Early/Sustained	0.0857032	0.30888	Late_change
133	gene:ENSG00000100813:t:23538685-23538871	ACIN1	-0.0575373	-0.376545	Late_change	-0.205369	-0.376222	Early/Sustained	-0.198091	-0.2818	Early/Sustained
134	gene:ENSG00000100813:t:23550957-23551045	ACIN1	0.0945132	0.398908	Late_change	0.119897	0.338919	Early/Sustained	0.0302006	0.0464014	Late_change
135	gene:ENSG00000100890:t:35592158-35592553	KIAA0391	-0.0278306	-0.288601	Late_change	-0.00375029	-0.492828	Late_change	NA	NA	NA
136	gene:ENSG00000100890:t:35595941-35595988	KIAA0391	-0.0143201	0.560392	Late_change	-0.00470903	0.446621	Late_change	0.194053	0.323572	Early/Sustained
137	gene:ENSG00000100908:s:24610098-24610174	EMC9	0.150314	0.461036	Early/Sustained	0.117363	0.381552	Early/Sustained	0.265675	0.401162	Early/Sustained
138	gene:ENSG00000100908:t:24608754-24609052	EMC9	-0.132246	-0.456008	Early/Sustained	-0.116523	-0.349202	Early/Sustained	-0.249261	-0.438871	Early/Sustained
139	gene:ENSG00000100938:t:24704943-24705026	GMPR2	0.0431288	0.334162	Late_change	-0.00114169	0.0302202	Late_change	0.0244931	0.222672	Late_change
140	gene:ENSG00000100949:t:24740319-24740454	RABGGTA	-0.00784377	0.335027	Late_change	0.0971084	0.00517219	Late_change	0.366316	0.350344	Early/Sustained
141	gene:ENSG00000100983:s:33530734-33530809	GSS	-0.0176813	0.273235	Late_change	0.0306819	0.126337	Late_change	0.040654	0.248485	Late_change
142	gene:ENSG00000100983:t:33530291-33530484	GSS	0.00291035	-0.193923	Late_change	-0.00496097	-0.264251	Late_change	-0.079181	-0.390745	Late_change
143	gene:ENSG00000101247:s:13789488-13789548	NDUFAF5	0.0162357	-0.429794	Late_change	0.0203569	-0.580788	Late_change	-0.0707396	-0.616007	Late_change
144	gene:ENSG00000101247:t:13797098-13797192	NDUFAF5	-0.00390929	0.249574	Late_change	-0.483783	0.459589	Early/transient	0.00173081	0.54923	Late_change
145	gene:ENSG00000101391:s:31989234-31989367	CDK5RAP1	-0.000431254	-0.356871	Late_change	-0.024408	-0.388003	Late_change	0.00824368	0.0259742	Late_change
146	gene:ENSG00000101782:t:21054912-21055071	RIOK3	-0.00374782	-0.21599	Late_change	-0.0726194	-0.219455	Late_change	-0.271614	-0.279213	Early/Sustained
147	gene:ENSG00000102078:s:129498602-129498831	SLC25A14	-0.0381389	0.547003	Late_change	0.00936672	0.373798	Late_change	0.302986	0.268066	Early/Sustained
148	gene:ENSG00000102103:s:48755195-48755376	PQBP1	0.0232109	0.100279	Late_change	NA	NA	NA	0.104514	0.251142	Early/Sustained
149	gene:ENSG00000102103:s:48755539-48755633	PQBP1	0.0159467	-0.434632	Late_change	0.0106423	-0.0227355	Late_change	-0.0832066	-0.555807	Late_change
150	gene:ENSG00000102103:t:48755756-48755859	PQBP1	0.0221818	0.0610465	Late_change	0.017486	0.236927	Late_change	0.10401	0.242444	Early/Sustained
151	gene:ENSG00000102316:t:54835720-54835809	MAGED2	0.0153851	-0.471368	Late_change	-0.127867	-0.364748	Early/Sustained	-0.0214111	-0.298531	Late_change
152	gene:ENSG00000102317:s:48433949-48434055	RBM3	0.0502778	0.272416	Late_change	0.103788	0.211451	Early/Sustained	0.242506	0.33391	Early/Sustained
153	gene:ENSG00000102317:t:48434179-48434807	RBM3	0.101653	0.291857	Early/Sustained	NA	NA	NA	0.247999	0.411479	Early/Sustained
154	gene:ENSG00000102710:s:37598172-37598354	SUPT20H	0.0119865	-0.380638	Late_change	-0.0809644	-0.498045	Late_change	-0.0741171	-0.539515	Late_change
155	gene:ENSG00000102710:t:37596148-37596457	SUPT20H	-0.00385976	-0.00547378	Late_change	-0.0575476	-0.276077	Late_change	-0.00209269	-0.217408	Late_change
156	gene:ENSG00000102805:s:77569978-77570262	CLN5	0.00292121	0.274173	Late_change	0.0536832	0.071227	Late_change	0.0897489	0.261543	Late_change
157	gene:ENSG00000102805:t:77574593-77576652	CLN5	-0.106612	-0.296803	Early/Sustained	-0.183468	-0.216847	Early/Sustained	-0.0343125	-0.362051	Late_change
158	gene:ENSG00000104177:t:48451810-48452001	MYEF2	-0.000272721	-0.433755	Late_change	NA	NA	NA	-0.0209875	-0.361968	Late_change
159	gene:ENSG00000104218:s:67998227-67998345	CSPP1	-0.234054	0.446891	Early/transient	0.0325437	0.277126	Late_change	0.0537727	0.480489	Late_change
160	gene:ENSG00000104218:t:68005778-68005876	CSPP1	-0.0398708	0.408224	Late_change	-0.0193352	0.00318003	Late_change	0.198265	0.401827	Early/Sustained
161	gene:ENSG00000104852:s:49604647-49604954	SNRNP70	-0.0393779	0.701764	Late_change	0.0853075	0.53767	Late_change	0.268128	0.804392	Early/Sustained
162	gene:ENSG00000104852:t:49607891-49607992	SNRNP70	0.00305685	0.144149	Late_change	0.105549	0.167078	Early/Sustained	0.238818	0.278096	Early/Sustained
163	gene:ENSG00000104859:s:45571273-45571378	CLASRP	-0.0204087	-0.202045	Late_change	-0.119068	-0.346477	Early/Sustained	-0.0965444	-0.30599	Late_change
164	gene:ENSG00000104859:t:45571678-45571742	CLASRP	-0.0261096	-0.19767	Late_change	-0.10268	-0.343986	Early/Sustained	-0.0879732	-0.297891	Late_change
165	gene:ENSG00000105127:s:15480957-15480990	AKAP8	0.011562	0.425872	Late_change	0.045985	0.360899	Late_change	NA	NA	NA
166	gene:ENSG00000105127:t:15479046-15479133	AKAP8	-0.0375964	0.394094	Late_change	0.0326984	0.256372	Late_change	0.0483626	0.494373	Late_change
167	gene:ENSG00000105321:t:47761346-47761660	CCDC9	-0.00947945	-0.204749	Late_change	-0.0040327	-0.25369	Late_change	-0.0881792	-0.334951	Late_change
168	gene:ENSG00000105397:s:10464718-10464910	TYK2	0.134541	-0.168434	Early/transient	0.00523398	-0.306721	Late_change	0.0117941	-0.245911	Late_change
169	gene:ENSG00000105486:t:48622394-48622447	LIG1	0.0827474	-0.466675	Late_change	0.00396381	-0.583123	Late_change	0.0453446	-0.550024	Late_change
170	gene:ENSG00000105520:s:11468295-11468415	DKFZP761J1410	-0.00517089	0.523633	Late_change	0.0628759	0.406036	Late_change	0.00513396	0.253856	Late_change
171	gene:ENSG00000105576:t:12831693-12832529	TNPO2	0.219534	0.623378	Early/Sustained	0.147518	0.712539	Early/Sustained	0.576779	0.690953	Early/Sustained
172	gene:ENSG00000105647:s:18271864-18272008	PIK3R2	-0.694616	0.00174777	Early/transient	NA	NA	NA	NA	NA	NA
173	gene:ENSG00000105700:t:18670910-18671360	KXD1	-0.0299847	-0.0246926	Late_change	0.0102763	-0.434954	Late_change	-0.0122413	-0.349758	Late_change
174	gene:ENSG00000105726:t:19764778-19764953	ATP13A1	-0.321113	-0.302018	Early/Sustained	-0.259597	-0.257533	Early/Sustained	-0.12777	-0.209204	Early/Sustained
175	gene:ENSG00000105793:t:90001469-90001542	GTPBP10	0.000638391	0.304247	Late_change	0.130857	0.300021	Early/Sustained	0.0140338	-0.0482689	Late_change
176	gene:ENSG00000105953:s:44684926-44685117	OGDH	-0.0231951	-0.321597	Late_change	-0.092383	-0.361916	Late_change	-0.330565	-0.258725	Early/Sustained
177	gene:ENSG00000105953:t:44706335-44706450	OGDH	0.0407074	0.367114	Late_change	0.0127808	0.250842	Late_change	0.0451939	0.347969	Late_change
178	gene:ENSG00000106246:t:99027211-99027429	PTCD1	0.0160748	0.0981327	Late_change	0.347985	0.351807	Early/Sustained	0.0303262	0.400546	Late_change
179	gene:ENSG00000106477:t:130033612-130038909	CEP41	-0.121642	-0.323974	Early/Sustained	-0.0248787	-0.271598	Late_change	-0.00882959	-0.037215	Late_change
180	gene:ENSG00000106682:s:73604152-73604346	EIF4H	0.0609199	0.152095	Late_change	0.11957	0.183076	Early/Sustained	0.0838135	0.228321	Late_change
181	gene:ENSG00000106682:t:73609071-73609208	EIF4H	0.0509201	0.177317	Late_change	0.131347	0.214901	Early/Sustained	0.125562	0.219422	Early/Sustained
182	gene:ENSG00000106991:s:130578222-130578332	ENG	0.463879	-0.485629	Early/transient	0.0339599	-0.275408	Late_change	0.0817466	-0.292636	Late_change
183	gene:ENSG00000106991:t:130577291-130578085	ENG	0.0802641	-0.423217	Late_change	0.290905	-0.121908	Early/transient	0.035612	-0.265229	Late_change
184	gene:ENSG00000107643:s:49514698-49514864	MAPK8	0.0130918	0.274403	Late_change	0.30434	0.401346	Early/Sustained	0.328592	0.0381726	Early/transient
185	gene:ENSG00000107643:t:49609655-49609825	MAPK8	0.00647715	0.273349	Late_change	0.0175643	0.339438	Late_change	0.357541	0.310646	Early/Sustained
186	gene:ENSG00000107897:t:27508652-27508786	ACBD5	0.0296789	0.215316	Late_change	0.0068854	0.558928	Late_change	-0.0661638	0.354245	Late_change
187	gene:ENSG00000108175:t:81036938-81037082	ZMIZ1	-0.0458323	-0.644528	Late_change	NA	NA	NA	NA	NA	NA
188	gene:ENSG00000108296:t:36965955-36966018	CWC25	0.021488	0.200701	Late_change	0.0506013	0.308509	Late_change	0.0307781	0.337575	Late_change
189	gene:ENSG00000108773:t:40270303-40270499	KAT2A	0.0553643	0.412775	Late_change	-0.0322795	0.350611	Late_change	0.473771	0.300106	Early/Sustained
190	gene:ENSG00000108848:s:48827857-48828055	LUC7L3	0.0423228	0.49958	Late_change	0.27728	0.523593	Early/Sustained	0.360687	0.417369	Early/Sustained
191	gene:ENSG00000109046:s:25633808-25633908	WSB1	0.0151448	0.300633	Late_change	0.201363	0.377294	Early/Sustained	0.318526	-0.234278	Early/transient
192	gene:ENSG00000109103:s:26874542-26874867	UNC119	-0.0442828	-0.134807	Late_change	NA	NA	NA	0.0194641	-0.293666	Late_change
193	gene:ENSG00000109107:t:26902439-26902932	ALDOC	0.200534	0.264589	Early/Sustained	0.0166792	0.254721	Late_change	0.114613	0.258643	Early/Sustained
194	gene:ENSG00000109475:t:109543079-109543180	RPL34	-0.00943965	-0.390047	Late_change	-0.0650508	-0.431723	Late_change	-0.115441	-0.487331	Early/Sustained
195	gene:ENSG00000110066:s:67933874-67934645	SUV420H1	0.00640972	-0.277048	Late_change	0.00134131	-0.380634	Late_change	-0.15014	-0.0523334	Early/transient
196	gene:ENSG00000110274:t:117209282-117209384	CEP164	-0.0256596	-0.486378	Late_change	-0.0193457	0.00348864	Late_change	0.0231139	-0.467389	Late_change
197	gene:ENSG00000110719:t:67810823-67810964	TCIRG1	-0.158184	-0.124993	Early/Sustained	-0.0355282	-0.315504	Late_change	-0.0414086	-0.263719	Late_change
198	gene:ENSG00000110871:s:120966743-120966985	COQ5	-0.0446802	0.191013	Late_change	-0.00895209	0.206538	Late_change	-0.0144457	0.254306	Late_change
199	gene:ENSG00000110871:t:120960017-120960166	COQ5	-0.155094	0.260953	Early/transient	-0.0615335	0.276755	Late_change	-0.0460772	0.267216	Late_change
200	gene:ENSG00000111325:t:123460340-123460414	OGFOD2	-0.0113552	-0.404553	Late_change	-0.0091137	-0.458556	Late_change	-0.0185302	-0.404638	Late_change
201	gene:ENSG00000111371:t:46636983-46637101	SLC38A1	-0.102811	-0.248668	Early/Sustained	0.080521	-0.3366	Late_change	-0.0441752	-0.207027	Late_change
202	gene:ENSG00000111790:s:27110534-27110676	FGFR1OP2	0.0919034	0.471964	Late_change	0.0257194	0.342519	Late_change	0.366684	0.21901	Early/Sustained
203	gene:ENSG00000111912:t:126242089-126242214	NCOA7	-0.151518	-0.406844	Early/Sustained	-0.340639	-0.413042	Early/Sustained	-0.195628	-0.51003	Early/Sustained
204	gene:ENSG00000112182:t:90718308-90718575	BACH2	-0.0751159	-0.499628	Late_change	0.00034885	-0.524685	Late_change	NA	NA	NA
205	gene:ENSG00000112242:t:20480077-20480188	E2F3	0.00546138	-0.576233	Late_change	0.0421592	-0.630779	Late_change	NA	NA	NA
206	gene:ENSG00000112514:t:33385258-33385611	CUTA	0.00992029	-0.292061	Late_change	0.0120521	-0.284749	Late_change	-0.0277607	-0.199856	Late_change
207	gene:ENSG00000112576:t:41904911-41905164	CCND3	-0.00533934	0.304622	Late_change	0.0660467	0.328235	Late_change	0.0735603	0.352968	Late_change
208	gene:ENSG00000112576:t:41907938-41908464	CCND3	0.041003	0.699514	Late_change	0.316949	0.802768	Early/Sustained	0.14767	0.837627	Early/Sustained
209	gene:ENSG00000112685:t:499645-499700	EXOC2	-0.0445355	-0.156304	Late_change	-0.0923424	-0.309787	Late_change	-0.253419	-0.22398	Early/Sustained
210	gene:ENSG00000112787:t:133144067-133144112	FBRSL1	-0.0316741	-0.603654	Late_change	-0.188656	-0.76555	Early/Sustained	-0.204381	-0.697679	Early/Sustained
211	gene:ENSG00000112877:t:644414-644540	CEP72	0.0682098	0.611434	Late_change	NA	NA	NA	0.0335836	0.611756	Late_change
212	gene:ENSG00000112972:t:43298620-43299077	HMGCS1	-0.246994	-0.272066	Early/Sustained	-0.12822	-0.49248	Early/Sustained	0.0193346	-0.156256	Late_change
213	gene:ENSG00000113360:s:31531746-31532216	DROSHA	0.0111608	0.453038	Late_change	-0.000169619	0.181725	Late_change	NA	NA	NA
214	gene:ENSG00000113360:t:31530905-31531031	DROSHA	0.00937198	0.43451	Late_change	-6.5e-05	0.195568	Late_change	NA	NA	NA
215	gene:ENSG00000113649:s:145888708-145888808	TCERG1	0.0516829	0.239047	Late_change	0.0922093	0.233432	Late_change	0.124917	0.320312	Early/Sustained
216	gene:ENSG00000113649:t:145890004-145891524	TCERG1	0.143002	0.264894	Early/Sustained	0.0592075	0.204503	Late_change	0.116304	0.279829	Early/Sustained
217	gene:ENSG00000113851:s:3214460-3214609	CRBN	-0.00542733	-0.249254	Late_change	-0.0054443	-0.236071	Late_change	0.0327958	-0.208971	Late_change
218	gene:ENSG00000114126:t:141724283-141724386	TFDP2	0.0154998	0.0381576	Late_change	-0.00118796	0.31579	Late_change	NA	NA	NA
219	gene:ENSG00000114354:t:100432487-100432713	TFG	0.00526747	0.165986	Late_change	0.0271764	0.238575	Late_change	0.0271394	0.293107	Late_change
220	gene:ENSG00000114650:t:47467487-47467659	SCAP	-0.010775	-0.194162	Late_change	-0.00450731	-0.262798	Late_change	-0.0175856	-0.0260692	Late_change
221	gene:ENSG00000114779:s:52007981-52008646	ABHD14B	0.0341001	0.233725	Late_change	0.00876376	0.26015	Late_change	0.0298586	0.327696	Late_change
222	gene:ENSG00000114861:t:71102787-71102924	FOXP1	0.0502433	0.335217	Late_change	0.0795174	0.276951	Late_change	NA	NA	NA
223	gene:ENSG00000114861:t:71161687-71161811	FOXP1	-0.00359426	-0.298992	Late_change	0.0230777	-0.0167743	Late_change	-0.274594	-0.48523	Early/Sustained
224	gene:ENSG00000114861:t:71348971-71349031	FOXP1	0.0150787	-0.634336	Late_change	0.0090249	-0.60152	Late_change	-0.277638	-0.507534	Early/Sustained
225	gene:ENSG00000114956:s:74177712-74177859	DGUOK	0.064788	0.231006	Late_change	NA	NA	NA	-0.0264323	0.251355	Late_change
226	gene:ENSG00000115310:t:55214627-55214854	RTN4	-0.00980757	0.182886	Late_change	0.0107167	0.234434	Late_change	-0.00144038	0.254181	Late_change
227	gene:ENSG00000115524:s:198285152-198285297	SF3B1	-0.00503279	0.525295	Late_change	NA	NA	NA	0.177281	0.542474	Early/Sustained
228	gene:ENSG00000115652:t:106774514-106774574	UXS1	-0.0090252	0.102163	Late_change	0.0385103	0.263946	Late_change	-0.000416893	0.199582	Late_change
229	gene:ENSG00000115677:t:242207892-242208109	HDLBP	0.00440495	-0.405048	Late_change	-0.109721	-0.274827	Early/Sustained	0.229585	-0.376598	Early/transient
230	gene:ENSG00000115685:s:242088991-242089123	PPP1R7	-0.00381215	0.0144957	Late_change	NA	NA	NA	0.00495731	-0.658491	Late_change
231	gene:ENSG00000115687:t:242082252-242082489	PASK	0.00224035	0.198297	Late_change	NA	NA	NA	NA	NA	NA
232	gene:ENSG00000115875:s:38976671-38976872	SRSF7	0.252538	0.237227	Early/Sustained	0.311231	0.286618	Early/Sustained	0.337073	0.254208	Early/Sustained
233	gene:ENSG00000115875:t:38975721-38975795	SRSF7	0.220266	0.165322	Early/Sustained	0.241851	0.243572	Early/Sustained	0.278573	0.201726	Early/Sustained
234	gene:ENSG00000115935:s:175547502-175547627	WIPF1	0.0223066	0.295243	Late_change	0.0233634	0.480645	Late_change	0.00715679	0.0126937	Late_change
235	gene:ENSG00000116001:s:70456191-70456223	TIA1	-0.367003	0.304849	Early/transient	0.237651	0.176216	Early/Sustained	0.123678	0.421978	Early/Sustained
236	gene:ENSG00000116001:t:70454867-70454954	TIA1	0.0101111	-0.0978126	Late_change	-0.298298	-0.351093	Early/Sustained	-0.0154433	-0.348507	Late_change
237	gene:ENSG00000116044:t:178098733-178098999	NFE2L2	-0.327008	-0.532137	Early/Sustained	-0.463883	-0.381599	Early/Sustained	-0.333291	-0.444935	Early/Sustained
238	gene:ENSG00000116138:t:15860732-15860798	DNAJC16	0.0354644	0.408074	Late_change	NA	NA	NA	NA	NA	NA
239	gene:ENSG00000116560:s:35652548-35652723	SFPQ	-0.36044	-0.311631	Early/Sustained	-0.394577	-0.368656	Early/Sustained	-0.495589	-0.476643	Early/Sustained
240	gene:ENSG00000116747:t:193044950-193045170	TROVE2	-0.00235068	0.361218	Late_change	0.0177372	-0.0550262	Late_change	-0.0124878	0.196527	Late_change
241	gene:ENSG00000116754:s:70694085-70694238	SRSF11	0.00574549	0.106787	Late_change	0.0635719	0.199901	Late_change	0.0115342	0.279196	Late_change
242	gene:ENSG00000116754:t:70697951-70698060	SRSF11	0.000698016	-0.250878	Late_change	NA	NA	NA	-0.0911059	-0.34987	Late_change
243	gene:ENSG00000116852:s:200953987-200954311	KIF21B	0.186528	0.336542	Early/Sustained	-0.00179037	0.178908	Late_change	-0.00341833	0.352023	Late_change
244	gene:ENSG00000116852:t:200950088-200950224	KIF21B	-0.203091	-0.389063	Early/Sustained	-0.00086405	-0.066935	Late_change	0.00363208	-0.342673	Late_change
245	gene:ENSG00000117262:t:145818767-145818826	GPR89A	-0.0147205	-0.330812	Late_change	-0.329883	-0.446214	Early/Sustained	0.00197709	-0.0516097	Late_change
246	gene:ENSG00000117360:t:150300779-150300925	PRPF3	-0.0211539	0.308293	Late_change	0.0505659	0.407841	Late_change	0.0323087	0.304656	Late_change
247	gene:ENSG00000117625:s:211433317-211433506	RCOR3	-0.018411	0.0465203	Late_change	0.0407937	0.292881	Late_change	0.0247102	0.307091	Late_change
248	gene:ENSG00000117625:s:211477425-211477482	RCOR3	-0.038042	0.00901672	Late_change	0.0602721	0.379334	Late_change	0.152716	0.334145	Early/Sustained
249	gene:ENSG00000119383:t:131904724-131904831	PPP2R4	-0.00948474	0.250937	Late_change	0.094006	0.115058	Late_change	0.0158263	0.238527	Late_change
250	gene:ENSG00000119397:s:123931889-123932257	CNTRL	0.0408188	-0.283219	Late_change	NA	NA	NA	0.0556376	-0.424147	Late_change
251	gene:ENSG00000119397:t:123886209-123886362	CNTRL	0.00650844	-0.695084	Late_change	NA	NA	NA	-0.0976729	-0.895529	Late_change
252	gene:ENSG00000119397:t:123935521-123935793	CNTRL	0.101015	-0.330264	Early/transient	NA	NA	NA	-0.01079	-0.442991	Late_change
253	gene:ENSG00000119688:s:74761851-74762392	ABCD4	0.0773552	0.271832	Late_change	0.0145491	0.0178992	Late_change	0.00902492	0.242975	Late_change
254	gene:ENSG00000119688:s:74769578-74769759	ABCD4	0.0122931	-0.0344672	Late_change	0.0249673	-0.255242	Late_change	0.00725416	-0.296923	Late_change
255	gene:ENSG00000119707:s:73566375-73566458	RBM25	-0.115859	-0.377716	Early/Sustained	-0.269408	-0.392825	Early/Sustained	-0.0984581	-0.364963	Late_change
256	gene:ENSG00000119707:s:73567009-73567070	RBM25	-0.400882	-0.564435	Early/Sustained	-0.431046	-0.698281	Early/Sustained	-0.0212008	-0.620682	Late_change
257	gene:ENSG00000119707:t:73567009-73567070	RBM25	-0.249251	-0.4536	Early/Sustained	NA	NA	NA	-0.0742221	-0.50299	Late_change
258	gene:ENSG00000119707:t:73569900-73570186	RBM25	0.0958849	0.354739	Late_change	NA	NA	NA	0.0651716	0.375538	Late_change
259	gene:ENSG00000120253:s:150052749-150052871	NUP43	0.0451496	0.509994	Late_change	-0.00760652	0.264372	Late_change	-0.0265423	0.00388616	Late_change
260	gene:ENSG00000120451:s:130773150-130773279	SNX19	0.0194705	-0.174814	Late_change	-0.160262	-0.351645	Early/Sustained	0.0104993	-0.352584	Late_change
261	gene:ENSG00000120662:s:41837621-41837683	MTRF1	0.142174	0.462147	Early/Sustained	0.0201585	0.268337	Late_change	-0.00601802	0.392738	Late_change
262	gene:ENSG00000120699:s:37578614-37578698	EXOSC8	0.0121506	0.161541	Late_change	0.0204166	0.171552	Late_change	0.089786	0.212916	Late_change
263	gene:ENSG00000120896:t:22423858-22423997	SORBS3	-4.31e-06	-0.227255	Late_change	-0.0503753	-0.263747	Late_change	0.00585757	-0.214604	Late_change
264	gene:ENSG00000120910:t:22384905-22385038	PPP3CC	0.014871	0.231024	Late_change	0.204957	0.191579	Early/Sustained	0.352151	0.420124	Early/Sustained
265	gene:ENSG00000121310:s:53373540-53373626	ECHDC2	-0.0447005	0.00390595	Late_change	-0.0338316	-0.359431	Late_change	-0.0521117	-0.250714	Late_change
266	gene:ENSG00000121310:t:53377395-53377693	ECHDC2	-0.206377	0.453468	Early/transient	-0.298702	0.422715	Early/transient	0.00794105	0.158254	Late_change
267	gene:ENSG00000121390:s:20304379-20304484	PSPC1	0.188802	0.230121	Early/Sustained	0.0898633	0.389354	Late_change	NA	NA	NA
268	gene:ENSG00000121578:s:118937497-118937619	B4GALT4	0.00168625	-0.05331	Late_change	-0.0658996	-0.41504	Late_change	0.149719	-0.264637	Early/transient
269	gene:ENSG00000121578:s:118953992-118954074	B4GALT4	-0.000239966	-0.00642093	Late_change	-0.178459	0.465318	Early/transient	-0.0133102	0.337474	Late_change
270	gene:ENSG00000121578:t:118935087-118935191	B4GALT4	0.00252429	-0.0426766	Late_change	-0.112705	-0.387903	Early/Sustained	0.163278	-0.258906	Early/transient
271	gene:ENSG00000121716:s:99950996-99951106	PILRB	0.0439169	0.00391305	Late_change	0.0234211	-0.476037	Late_change	0.00864426	-0.416878	Late_change
272	gene:ENSG00000122085:s:242041668-242041747	MTERFD2	0.020503	-0.365561	Late_change	-0.164898	-0.357439	Early/Sustained	-0.170435	0.0220615	Early/transient
273	gene:ENSG00000122085:t:242029395-242029459	MTERFD2	-0.0732386	-0.298464	Late_change	NA	NA	NA	-0.0807654	-0.113685	Late_change
274	gene:ENSG00000122435:t:100605964-100606368	TRMT13	-0.0213472	0.322411	Late_change	0.220663	0.230155	Early/Sustained	0.0143211	0.0604603	Late_change
275	gene:ENSG00000122515:t:44800024-44800192	ZMIZ2	0.031444	-0.03105	Late_change	0.0237132	0.278835	Late_change	0.00174264	-0.267548	Late_change
276	gene:ENSG00000122550:s:23164667-23165255	KLHL7	0.0238788	0.427759	Late_change	0.0291867	0.0173154	Late_change	0.378916	0.598979	Early/Sustained
277	gene:ENSG00000122643:s:33102180-33102409	NT5C3A	0.151901	0.487939	Early/Sustained	-0.00340213	0.321722	Late_change	0.0244773	0.452014	Late_change
278	gene:ENSG00000122643:t:33066305-33066527	NT5C3A	0.00394991	0.53737	Late_change	-0.163635	0.420513	Early/transient	-0.00794071	0.424948	Late_change
279	gene:ENSG00000122707:s:36083362-36083559	RECK	0.261475	-0.508367	Early/transient	-0.00516879	-0.00654097	Late_change	NA	NA	NA
280	gene:ENSG00000122965:s:114261014-114261380	RBM19	-0.0872639	-0.249179	Late_change	-0.0303098	-0.432414	Late_change	-0.260839	-0.360907	Early/Sustained
281	gene:ENSG00000123146:s:14501736-14502009	CD97	0.225736	0.445254	Early/Sustained	0.357511	0.353975	Early/Sustained	0.234227	0.369	Early/Sustained
282	gene:ENSG00000123146:t:14508470-14508616	CD97	-0.252164	-0.291386	Early/Sustained	-0.198623	-0.314648	Early/Sustained	-0.208007	-0.206853	Early/Sustained
283	gene:ENSG00000123349:s:53690075-53690370	PFDN5	0.0109233	0.386233	Late_change	-0.0199642	0.0831196	Late_change	0.00583123	0.345815	Late_change
284	gene:ENSG00000123415:t:54575059-54575431	SMUG1	-0.418192	-0.322043	Early/Sustained	-0.0184464	-0.368578	Late_change	0.141133	-0.385769	Early/transient
285	gene:ENSG00000124193:t:42088411-42088535	SRSF6	0.333714	0.293267	Early/Sustained	0.312795	0.379743	Early/Sustained	0.395122	0.285874	Early/Sustained
286	gene:ENSG00000124222:s:57226661-57227194	STX16	-0.122776	0.235864	Early/transient	0.0475727	0.0682942	Late_change	0.0124604	0.240717	Late_change
287	gene:ENSG00000124370:s:71357310-71357369	MCEE	-0.00582948	0.0392433	Late_change	0.00921039	0.339799	Late_change	-0.113419	0.636494	Early/transient
288	gene:ENSG00000124370:t:71351336-71351673	MCEE	-0.00288335	0.0178977	Late_change	0.072908	0.409981	Late_change	0.00137863	0.641418	Late_change
289	gene:ENSG00000124496:s:42232442-42232592	TRERF1	-0.00703117	-0.323909	Late_change	-0.0126184	-0.697656	Late_change	NA	NA	NA
290	gene:ENSG00000124496:t:42226672-42227461	TRERF1	0.0484496	-0.382356	Late_change	-0.00446995	-0.694581	Late_change	NA	NA	NA
291	gene:ENSG00000125450:s:73222010-73222252	NUP85	-0.0236594	0.372125	Late_change	0.0824605	0.325229	Late_change	0.151575	0.264995	Early/Sustained
292	gene:ENSG00000125450:t:73227435-73227518	NUP85	0.0330625	0.397282	Late_change	0.0457024	0.32848	Late_change	0.098599	0.444138	Late_change
293	gene:ENSG00000125459:s:155716587-155716726	MSTO1	-0.11943	-0.0453011	Early/transient	-0.0161472	-0.524184	Late_change	-0.0290924	-0.268298	Late_change
294	gene:ENSG00000125459:s:155717292-155717471	MSTO1	0.0117189	0.30443	Late_change	0.206185	0.268321	Early/Sustained	-0.0761114	0.174109	Late_change
295	gene:ENSG00000125459:t:155717553-155718153	MSTO1	-0.035084	0.281558	Late_change	0.101493	0.365683	Early/Sustained	0.0265538	0.175417	Late_change
296	gene:ENSG00000125772:s:5573973-5574057	GPCPD1	0.00809	-0.497734	Late_change	-0.195579	-0.401186	Early/Sustained	-0.0474506	-0.479588	Late_change
297	gene:ENSG00000125772:t:5564923-5564968	GPCPD1	0.00259483	-0.34281	Late_change	-0.124775	-0.0436874	Early/transient	-0.0644858	-0.331057	Late_change
298	gene:ENSG00000125843:t:3802749-3802940	AP5S1	-0.00227639	-0.324912	Late_change	-0.0770911	-0.334005	Late_change	0.00527974	-0.245169	Late_change
299	gene:ENSG00000125952:s:65544492-65544764	MAX	0.149759	0.198599	Early/Sustained	0.0697467	0.161503	Late_change	0.200096	0.269128	Early/Sustained
300	gene:ENSG00000125952:t:65541842-65543381	MAX	0.109497	0.408825	Early/Sustained	0.216149	0.346367	Early/Sustained	0.355618	0.419843	Early/Sustained
301	gene:ENSG00000126005:s:33865812-33865830	MMP24-AS1	0.143422	-0.289576	Early/transient	0.0227398	-0.0772852	Late_change	NA	NA	NA
302	gene:ENSG00000126214:s:104151323-104151653	KLC1	-0.0217659	0.345983	Late_change	-0.026227	0.0196796	Late_change	0.0436992	0.385028	Late_change
303	gene:ENSG00000126214:t:104151975-104153254	KLC1	0.0812412	-0.386602	Late_change	0.083773	-0.233184	Late_change	-0.222782	-0.34357	Early/Sustained
304	gene:ENSG00000126456:s:50167430-50167930	IRF3	-0.0368548	-0.727747	Late_change	-0.246074	-0.627695	Early/Sustained	-0.190136	-0.761561	Early/Sustained
305	gene:ENSG00000126456:s:50168888-50169132	IRF3	0.0413435	-0.29466	Late_change	-0.180325	-0.288786	Early/Sustained	-0.180301	-0.335399	Early/Sustained
306	gene:ENSG00000126456:t:50166600-50166789	IRF3	0.0057731	-0.386887	Late_change	-0.0411359	-0.235862	Late_change	-0.0148201	-0.311064	Late_change
307	gene:ENSG00000126581:s:40964244-40964374	BECN1	-0.00655739	-0.904246	Late_change	NA	NA	NA	-0.404334	-0.678517	Early/Sustained
308	gene:ENSG00000126653:s:28445056-28445191	NSRP1	0.0205134	0.118831	Late_change	-0.303659	0.25789	Early/transient	-0.00603639	0.433538	Late_change
309	gene:ENSG00000127125:t:42922918-42923238	PPCS	0.00518729	0.134891	Late_change	-0.0457389	0.303326	Late_change	0.0292107	0.381278	Late_change
310	gene:ENSG00000127419:t:944209-944306	TMEM175	-0.00481972	-0.450773	Late_change	-0.00858881	-0.0300253	Late_change	-0.235981	-0.346323	Early/Sustained
311	gene:ENSG00000127527:t:16472392-16472795	EPS15L1	-0.0125631	0.432114	Late_change	0.00941079	-5.53e-05	Late_change	-0.254842	0.399609	Early/transient
312	gene:ENSG00000127663:s:5110633-5110829	KDM4B	-0.286611	-0.414829	Early/Sustained	-0.0137181	-0.506528	Late_change	-0.454838	-0.247508	Early/Sustained
313	gene:ENSG00000127663:t:5119664-5119863	KDM4B	0.0151858	0.567383	Late_change	-0.0258746	0.708488	Late_change	0.163949	0.468772	Early/Sustained
314	gene:ENSG00000127957:t:75140253-75140611	PMS2P3	-0.00999696	-0.199843	Late_change	0.0291452	-0.373214	Late_change	-0.0382238	-0.365863	Late_change
315	gene:ENSG00000127980:s:92140258-92140361	PEX1	0.0457165	0.0119444	Late_change	0.000459826	0.815941	Late_change	-0.00467973	0.363815	Late_change
316	gene:ENSG00000127980:t:92136295-92136440	PEX1	0.134057	0.194468	Early/Sustained	-0.015287	0.679628	Late_change	0.114173	0.521868	Early/Sustained
317	gene:ENSG00000128271:t:24829099-24829776	ADORA2A	0.0509246	0.295455	Late_change	0.191183	0.125429	Early/Sustained	0.175983	0.183432	Early/Sustained
318	gene:ENSG00000128699:s:190647740-190648299	ORMDL1	0.211281	0.387105	Early/Sustained	0.251127	0.31905	Early/Sustained	0.443567	0.485806	Early/Sustained
319	gene:ENSG00000129197:s:5326089-5326149	RPAIN	0.00490761	-0.353165	Late_change	0.0353014	-0.324299	Late_change	0.00268658	-0.269918	Late_change
320	gene:ENSG00000129197:t:5335862-5336196	RPAIN	0.0334107	-0.282037	Late_change	0.0529632	-0.332115	Late_change	0.0340985	-0.31077	Late_change
321	gene:ENSG00000129484:t:20825797-20826064	PARP2	-0.0679963	-0.265674	Late_change	-0.0366378	-0.241991	Late_change	-0.0316251	-0.380896	Late_change
322	gene:ENSG00000130159:t:11618517-11618694	ECSIT	0.0444535	-0.319762	Late_change	0.0207819	-0.0769109	Late_change	-0.044873	-0.228319	Late_change
323	gene:ENSG00000130305:s:72717593-72717737	NSUN5	0.0342749	-0.304078	Late_change	0.00491706	-0.172472	Late_change	-0.0450107	-0.245613	Late_change
324	gene:ENSG00000130669:s:39658867-39658952	PAK4	0.211499	-0.008448	Early/transient	-0.0309881	0.416925	Late_change	-0.391406	-0.357787	Early/Sustained
325	gene:ENSG00000130779:t:122825300-122826244	CLIP1	0.200203	0.132883	Early/Sustained	NA	NA	NA	0.464888	0.202441	Early/transient
326	gene:ENSG00000130816:t:10252597-10252896	DNMT1	0.0879736	0.237786	Late_change	0.149038	0.333061	Early/Sustained	0.210426	0.200715	Early/Sustained
327	gene:ENSG00000130844:s:54025871-54025938	ZNF331	-0.0222909	-0.380828	Late_change	NA	NA	NA	0.0244576	-0.373692	Late_change
328	gene:ENSG00000130844:t:54059060-54059162	ZNF331	-0.216034	-0.290036	Early/Sustained	NA	NA	NA	-0.010343	-0.310108	Late_change
329	gene:ENSG00000130985:t:47058202-47058355	UBA1	-0.0413154	-0.414512	Late_change	-0.0967167	-0.301259	Late_change	-0.0209153	-0.430761	Late_change
330	gene:ENSG00000131051:s:34328728-34328951	RBM39	-0.0391467	-0.266413	Late_change	NA	NA	NA	-0.276362	-0.36136	Early/Sustained
331	gene:ENSG00000131437:s:132046642-132046749	KIF3A	0.0910992	0.40161	Late_change	0.0157609	0.0338832	Late_change	0.419424	0.390328	Early/Sustained
332	gene:ENSG00000131446:t:180217541-180220097	MGAT1	0.122307	0.332289	Early/Sustained	0.360722	0.245548	Early/Sustained	0.563278	0.185897	Early/transient
333	gene:ENSG00000131446:t:180222575-180222875	MGAT1	0.128282	0.420471	Early/Sustained	0.179006	0.090519	Early/Sustained	0.633621	0.305396	Early/transient
334	gene:ENSG00000131446:t:180235850-180236076	MGAT1	0.00789636	0.301179	Late_change	0.183213	0.50071	Early/Sustained	0.0216093	0.260915	Late_change
335	gene:ENSG00000131503:s:139918498-139918927	ANKHD1	-0.0196386	-0.154179	Late_change	-0.0615082	-0.274006	Late_change	-0.0354224	-0.235453	Late_change
336	gene:ENSG00000132153:s:47859512-47859607	DHX30	0.00164933	-0.38653	Late_change	0.0150926	-0.274863	Late_change	-0.00328156	-0.508718	Late_change
337	gene:ENSG00000132153:t:47868837-47868998	DHX30	-0.181492	-0.160153	Early/Sustained	-0.0436466	-0.256489	Late_change	-0.201897	-0.212686	Early/Sustained
338	gene:ENSG00000132196:t:162767592-162767939	HSD17B7	0.039133	0.310598	Late_change	0.183318	0.322264	Early/Sustained	0.33708	0.401076	Early/Sustained
339	gene:ENSG00000132199:s:678696-678737	ENOSF1	-0.0733987	0.014278	Late_change	0.214094	0.258513	Early/Sustained	-0.0322768	0.399898	Late_change
340	gene:ENSG00000132199:s:683246-683734	ENOSF1	-0.00372769	0.23907	Late_change	0.0307505	0.282841	Late_change	0.264115	0.0208921	Early/transient
341	gene:ENSG00000132199:t:675321-675436	ENOSF1	0.00509935	0.270181	Late_change	0.0190088	0.269202	Late_change	0.108452	0.315202	Early/Sustained
342	gene:ENSG00000132906:t:15821768-15821947	CASP9	-0.0295402	-0.420948	Late_change	-0.0596504	-0.251025	Late_change	0.00341735	-0.0019921	Late_change
343	gene:ENSG00000133030:t:17045941-17046079	MPRIP	0.227918	0.354795	Early/Sustained	-0.26027	0.520452	Early/transient	0.0146055	0.345903	Late_change
344	gene:ENSG00000133104:t:36909158-36909969	SPG20	-0.00761866	-0.479702	Late_change	-0.0559703	-0.16883	Late_change	-0.0145007	-0.360468	Late_change
345	gene:ENSG00000133114:s:45601920-45602405	GPALPP1	-0.00973803	-0.343826	Late_change	-0.00924548	-0.0401162	Late_change	-0.122589	-0.296274	Early/Sustained
346	gene:ENSG00000133961:s:73748998-73749213	NUMB	-0.153228	-0.322114	Early/Sustained	-0.0849799	-0.295678	Late_change	-0.125789	-0.0847032	Early/Sustained
347	gene:ENSG00000133961:t:73741815-73744001	NUMB	-0.0421362	-0.40425	Late_change	-0.0309825	-0.222398	Late_change	-0.0085299	-0.39111	Late_change
348	gene:ENSG00000134109:s:5249778-5249948	EDEM1	-0.0051827	0.151328	Late_change	0.0558081	0.256804	Late_change	0.0333242	0.2016	Late_change
349	gene:ENSG00000134444:s:59942607-59942805	KIAA1468	-0.0110356	0.356878	Late_change	0.011739	0.554431	Late_change	-0.0159022	0.531564	Late_change
350	gene:ENSG00000134444:t:59947854-59947942	KIAA1468	0.0202534	-0.584686	Late_change	-0.0163925	-0.296221	Late_change	0.0568645	-0.36785	Late_change
351	gene:ENSG00000134452:t:5948000-5948595	FBXO18	0.0202538	0.255876	Late_change	0.0256271	0.319145	Late_change	NA	NA	NA
352	gene:ENSG00000134815:s:47852538-47853309	DHX34	0.00222527	-0.799389	Late_change	NA	NA	NA	NA	NA	NA
353	gene:ENSG00000134815:t:47856011-47856992	DHX34	0.0301621	0.738406	Late_change	NA	NA	NA	NA	NA	NA
354	gene:ENSG00000135090:t:118704460-118704564	TAOK3	0.0239971	0.206379	Late_change	-0.0205015	0.284905	Late_change	-9.22e-05	0.242731	Late_change
355	gene:ENSG00000135587:s:109763746-109763832	SMPD2	-0.00859609	0.424419	Late_change	-0.0145883	-0.00641388	Late_change	0.271783	0.383736	Early/Sustained
356	gene:ENSG00000135587:t:109763955-109764087	SMPD2	-0.145096	0.549541	Early/transient	0.133158	0.0271522	Early/transient	0.227876	0.489317	Early/Sustained
357	gene:ENSG00000135655:t:62708571-62708697	USP15	0.0155316	0.231018	Late_change	0.0276919	0.39042	Late_change	NA	NA	NA
358	gene:ENSG00000135655:t:62775271-62775450	USP15	-0.00554612	0.234711	Late_change	0.0223205	0.372568	Late_change	0.229348	0.0364189	Early/transient
359	gene:ENSG00000135905:t:225796266-225796385	DOCK10	0.0608731	0.419558	Late_change	0.193487	-0.0161305	Early/transient	0.299315	0.679909	Early/Sustained
360	gene:ENSG00000135956:s:96931607-96931732	TMEM127	0.0603631	0.262105	Late_change	0.232168	0.284838	Early/Sustained	-0.00334034	0.141492	Late_change
361	gene:ENSG00000135974:t:105959558-105959680	C2orf49	0.00281014	-0.0761265	Late_change	-0.0750462	-0.274234	Late_change	-0.164764	-0.412295	Early/Sustained
362	gene:ENSG00000136003:t:108961434-108961684	ISCU	0.00491702	0.322494	Late_change	NA	NA	NA	0.0977524	0.555934	Late_change
363	gene:ENSG00000136044:s:105571004-105571040	APPL2	-0.00314307	-0.238299	Late_change	-0.0937323	-0.269532	Late_change	-0.0118711	-0.161471	Late_change
364	gene:ENSG00000136044:t:105569813-105570152	APPL2	-0.0105882	-0.302779	Late_change	-0.0622994	-0.311992	Late_change	-0.00905877	-0.18158	Late_change
365	gene:ENSG00000136270:t:45142932-45143177	TBRG4	-0.225154	0.191038	Early/transient	NA	NA	NA	-0.151796	0.233981	Early/transient
366	gene:ENSG00000136280:s:45039784-45039962	CCM2	-0.144616	-0.120146	Early/Sustained	-0.214864	-0.285365	Early/Sustained	-0.023505	-0.338893	Late_change
367	gene:ENSG00000136280:t:45077794-45078025	CCM2	-0.144684	-0.671458	Early/Sustained	-0.184047	-0.737173	Early/Sustained	-0.312589	-0.760191	Early/Sustained
368	gene:ENSG00000136643:t:213415912-213416001	RPS6KC1	0.0202957	-0.313323	Late_change	-0.0334436	0.00238308	Late_change	0.00522027	-0.511666	Late_change
369	gene:ENSG00000136682:s:114222706-114222750	CBWD2	-0.018082	-0.428152	Late_change	-0.0136754	0.040293	Late_change	-0.0543374	-0.611365	Late_change
370	gene:ENSG00000136709:t:128520107-128520751	WDR33	0.488407	0.153054	Early/transient	0.285864	0.511955	Early/Sustained	0.0098588	0.375218	Late_change
371	gene:ENSG00000136754:s:27065994-27066170	ABI1	-0.00855351	0.102575	Late_change	0.0770896	0.201058	Late_change	0.00739118	0.212306	Late_change
372	gene:ENSG00000136754:t:27059174-27059274	ABI1	0.016937	-0.0493929	Late_change	-0.0616747	-0.29287	Late_change	-0.0330764	-0.244724	Late_change
373	gene:ENSG00000136840:s:130674547-130674959	ST6GALNAC4	-0.0135115	-0.343888	Late_change	-0.0137661	-0.265935	Late_change	0.00329103	-0.336766	Late_change
374	gene:ENSG00000136935:s:127703119-127703378	GOLGA1	0.00545316	0.5155	Late_change	NA	NA	NA	NA	NA	NA
375	gene:ENSG00000136935:t:127702385-127702434	GOLGA1	0.00348457	0.526673	Late_change	NA	NA	NA	NA	NA	NA
376	gene:ENSG00000137161:t:42903137-42903224	CNPY3	0.0142029	-0.523767	Late_change	-0.0417916	-0.37514	Late_change	-0.296238	-0.382198	Early/Sustained
377	gene:ENSG00000137210:t:10770310-10770328	TMEM14B	-0.0283659	-0.00330337	Late_change	-0.151209	-0.303928	Early/Sustained	-0.0105984	-0.418626	Late_change
378	gene:ENSG00000137221:s:43472326-43472415	TJAP1	0.100829	-0.362401	Early/transient	-0.164664	0.0507431	Early/transient	-0.0522634	-0.34754	Late_change
379	gene:ENSG00000137486:t:74979933-74980177	ARRB1	-0.00334349	0.258278	Late_change	-0.227109	0.0287599	Early/transient	0.320176	0.33518	Early/Sustained
380	gene:ENSG00000137497:t:71746948-71747021	NUMA1	0.0163677	0.504536	Late_change	NA	NA	NA	-0.000148792	0.544064	Late_change
381	gene:ENSG00000137720:t:111753092-111753322	C11orf1	0.0344307	0.235341	Late_change	0.144271	0.283174	Early/Sustained	0.510265	0.168149	Early/transient
382	gene:ENSG00000137752:s:104896936-104897083	CASP1	-0.0162531	-0.318114	Late_change	-0.0453412	-0.517045	Late_change	-0.0351101	-0.230321	Late_change
383	gene:ENSG00000137776:s:59193459-59193486	SLTM	-0.0266644	0.025653	Late_change	-0.127709	0.304386	Early/transient	-0.0331897	0.279691	Late_change
384	gene:ENSG00000137817:t:72542361-72542433	PARP6	-0.00495909	0.245549	Late_change	-0.0400228	0.140957	Late_change	-0.10841	0.281006	Early/transient
385	gene:ENSG00000137841:t:40583457-40583688	PLCB2	-0.180113	-0.288013	Early/Sustained	-0.0612054	-0.30267	Late_change	0.0127604	-0.354647	Late_change
386	gene:ENSG00000137996:s:100732080-100732485	RTCA	0.0168316	0.251102	Late_change	-0.0238581	0.313729	Late_change	0.368479	0.253557	Early/Sustained
387	gene:ENSG00000137996:t:100733604-100733851	RTCA	0.01943	0.213975	Late_change	-0.0140138	0.342584	Late_change	0.295124	0.266582	Early/Sustained
388	gene:ENSG00000138050:t:39983029-39983100	THUMPD2	0.176131	0.177128	Early/Sustained	0.294554	0.468616	Early/Sustained	0.395198	0.462128	Early/Sustained
389	gene:ENSG00000138326:s:79796923-79797062	RPS24	0.0206085	0.814961	Late_change	NA	NA	NA	0.305606	0.827973	Early/Sustained
390	gene:ENSG00000138326:t:79800373-79800505	RPS24	0.016301	0.830788	Late_change	0.20919	0.784434	Early/Sustained	0.348691	0.825735	Early/Sustained
391	gene:ENSG00000138399:s:170428163-170429167	FASTKD1	0.0390684	0.223599	Late_change	0.0130348	0.320249	Late_change	0.0059245	0.0580014	Late_change
392	gene:ENSG00000138399:t:170419735-170419860	FASTKD1	0.0241116	0.217433	Late_change	0.0181732	0.325781	Late_change	0.0041306	0.06987	Late_change
393	gene:ENSG00000138750:s:77065543-77065626	NUP54	0.00961938	-0.113699	Late_change	-0.0326017	-0.217325	Late_change	-0.111286	-0.185338	Early/Sustained
394	gene:ENSG00000138757:s:76649460-76649709	G3BP2	0.0189218	-0.476092	Late_change	NA	NA	NA	NA	NA	NA
395	gene:ENSG00000138795:s:109004369-109004602	LEF1	-2.03e-07	-0.171989	Late_change	-0.0455789	-0.23654	Late_change	-0.108251	-0.227806	Early/Sustained
396	gene:ENSG00000138795:t:109000648-109000770	LEF1	2.53e-07	-0.153775	Late_change	-0.0293361	-0.246351	Late_change	-0.0743109	-0.220729	Late_change
397	gene:ENSG00000138867:t:24944885-24944969	GUCD1	0.23613	0.287693	Early/Sustained	NA	NA	NA	-0.00771668	0.406438	Late_change
398	gene:ENSG00000139154:s:19671021-19671126	AEBP2	0.0800432	0.321146	Late_change	-0.0566015	0.0279061	Late_change	-0.00407855	0.417138	Late_change
399	gene:ENSG00000139436:s:110388972-110389151	GIT2	-0.185193	-0.259617	Early/Sustained	-0.0897237	-0.439155	Late_change	-0.0311414	-0.102836	Late_change
400	gene:ENSG00000140153:t:102689151-102690010	WDR20	-0.156789	-0.668249	Early/Sustained	-0.0791599	-0.578945	Late_change	-0.194581	-0.146169	Early/Sustained
401	gene:ENSG00000140511:t:89422198-89422500	HAPLN3	-0.155426	-0.259518	Early/Sustained	-0.0247095	-0.399203	Late_change	-0.121942	-0.0280884	Early/transient
402	gene:ENSG00000140688:s:31504924-31505130	C16orf58	-0.0183626	-0.266103	Late_change	0.0229918	-0.414988	Late_change	0.0205881	-0.449273	Late_change
403	gene:ENSG00000140688:t:31504788-31504845	C16orf58	0.000125321	0.260564	Late_change	0.000761334	0.385252	Late_change	-0.0294398	0.399496	Late_change
404	gene:ENSG00000140750:s:24953308-24953464	ARHGAP17	-0.000844231	-0.430597	Late_change	-0.3182	-0.420135	Early/Sustained	-0.186558	-0.352611	Early/Sustained
405	gene:ENSG00000140750:t:24946791-24946960	ARHGAP17	-0.079133	-0.51771	Late_change	-0.108765	-0.543182	Early/Sustained	-0.305484	-0.326682	Early/Sustained
406	gene:ENSG00000140943:s:84115352-84115536	MBTPS1	-0.0215369	0.20779	Late_change	0.00435759	0.263677	Late_change	-0.0185018	0.244812	Late_change
407	gene:ENSG00000140995:s:90014333-90015222	DEF8	0.0326074	0.335474	Late_change	0.0162966	0.131403	Late_change	0.323182	0.373165	Early/Sustained
408	gene:ENSG00000141012:t:88908305-88908379	GALNS	0.00971466	0.297042	Late_change	-0.0519828	0.383258	Late_change	-0.0651816	0.433381	Late_change
409	gene:ENSG00000141295:t:45915058-45915368	SCRN2	0.0069726	-0.268706	Late_change	NA	NA	NA	0.0504615	-0.28009	Late_change
410	gene:ENSG00000141503:t:4795951-4796063	MINK1	0.00116401	0.304627	Late_change	-0.0104683	0.257774	Late_change	0.0582336	0.233661	Late_change
411	gene:ENSG00000141556:t:80828100-80828590	TBCD	0.0529467	0.5651	Late_change	0.358352	0.499192	Early/Sustained	0.451585	0.194991	Early/transient
412	gene:ENSG00000141698:t:39991455-39991549	NT5C3B	-0.0100968	0.285543	Late_change	0.0538357	0.242378	Late_change	0.133266	0.124136	Early/Sustained
413	gene:ENSG00000141905:t:3381710-3382241	NFIC	-0.000308246	-0.582321	Late_change	NA	NA	NA	NA	NA	NA
414	gene:ENSG00000141956:s:43218743-43219401	PRDM15	0.0478625	0.350463	Late_change	0.527938	0.403074	Early/Sustained	0.31179	0.00182164	Early/transient
415	gene:ENSG00000141956:t:43218385-43218656	PRDM15	0.01859	-0.480732	Late_change	-0.454163	-0.440784	Early/Sustained	-0.329501	-0.0417386	Early/transient
416	gene:ENSG00000142002:t:4714093-4714349	DPP9	0.0119861	0.0139677	Late_change	-0.107801	0.329096	Early/transient	0.0279887	0.233352	Late_change
417	gene:ENSG00000142082:t:233343-233683	SIRT3	0.115934	-0.408243	Early/transient	-0.354021	-0.0260116	Early/transient	0.153518	-0.351918	Early/transient
418	gene:ENSG00000142330:s:241534416-241534721	CAPN10	-0.0834132	-0.251958	Late_change	-0.00983531	-0.298545	Late_change	-0.019689	-0.30391	Late_change
419	gene:ENSG00000142330:s:241535665-241535938	CAPN10	0.00350997	0.356106	Late_change	0.00805617	-0.0112469	Late_change	-0.0242284	0.313263	Late_change
420	gene:ENSG00000142556:s:52521261-52521356	ZNF614	-0.142985	0.406257	Early/transient	-0.0128363	0.37255	Late_change	-0.00310363	0.00756534	Late_change
421	gene:ENSG00000143363:t:151006282-151008189	PRUNE	-0.00401403	0.257238	Late_change	0.0274907	-0.0159418	Late_change	0.00146515	0.269551	Late_change
422	gene:ENSG00000143379:t:150900180-150900450	SETDB1	0.0128425	-0.0182259	Late_change	0.090507	-0.386527	Late_change	0.0321079	-0.25873	Late_change
423	gene:ENSG00000143569:s:154234068-154234173	UBAP2L	0.0262994	0.230782	Late_change	0.0543676	0.322204	Late_change	0.171297	0.283022	Early/Sustained
424	gene:ENSG00000143643:t:231069525-231069607	TTC13	0.0644706	-0.342966	Late_change	-0.048385	-0.542465	Late_change	2.92e-05	-0.0928017	Late_change
425	gene:ENSG00000144120:s:120436743-120437569	TMEM177	0.0012728	0.354508	Late_change	0.28531	0.342082	Early/Sustained	0.0167805	0.00754664	Late_change
426	gene:ENSG00000144134:s:114392605-114392707	RABL2A	-0.234693	-0.00355618	Early/transient	0.344408	0.636335	Early/Sustained	NA	NA	NA
427	gene:ENSG00000144199:t:97755846-97756062	FAHD2B	0.0198032	0.269435	Late_change	0.0366524	0.0714019	Late_change	0.107327	0.352958	Early/Sustained
428	gene:ENSG00000144199:t:97757199-97757449	FAHD2B	0.241297	0.121744	Early/Sustained	-0.0610794	0.331733	Late_change	NA	NA	NA
429	gene:ENSG00000144401:t:208446077-208446884	METTL21A	0.00589736	0.00789341	Late_change	-0.00236096	0.494952	Late_change	NA	NA	NA
430	gene:ENSG00000144504:t:241465102-241465266	ANKMY1	-0.00925195	-0.372198	Late_change	NA	NA	NA	-0.0522313	-0.429142	Late_change
431	gene:ENSG00000144524:t:232653265-232653442	COPS7B	0.063606	0.389127	Late_change	0.296582	0.235344	Early/Sustained	0.314447	0.417989	Early/Sustained
432	gene:ENSG00000144559:s:11880696-11880788	TAMM41	0.0293545	-0.307448	Late_change	0.365778	-0.162309	Early/transient	-0.00692249	-0.393471	Late_change
433	gene:ENSG00000144591:t:220370322-220370483	GMPPA	0.0599639	0.240385	Late_change	NA	NA	NA	0.00161945	0.290278	Late_change
434	gene:ENSG00000144674:s:37396592-37396678	GOLGA4	0.184236	0.354881	Early/Sustained	0.036433	0.64796	Late_change	0.437964	0.276495	Early/Sustained
435	gene:ENSG00000144674:t:37407571-37408242	GOLGA4	-0.101048	-0.417865	Early/Sustained	-0.0630729	-0.496542	Late_change	-0.354879	-0.328282	Early/Sustained
436	gene:ENSG00000144827:t:111705111-111705238	ABHD10	-0.00872235	0.114081	Late_change	-0.0119894	0.291343	Late_change	-0.188072	0.328074	Early/transient
437	gene:ENSG00000145349:s:114469491-114469885	CAMK2D	0.020241	0.00130614	Late_change	0.00545224	0.382755	Late_change	-0.00212223	0.296837	Late_change
438	gene:ENSG00000145349:t:114458497-114458599	CAMK2D	0.0372967	0.0121582	Late_change	-0.0256233	0.419874	Late_change	-0.0369637	0.341406	Late_change
439	gene:ENSG00000145730:t:102361083-102363942	PAM	-0.0197349	-0.244159	Late_change	-0.0155544	-0.302295	Late_change	-0.184958	0.0544836	Early/transient
440	gene:ENSG00000145779:n:118728511-118735383	TNFAIP8	0.186513	0.633739	Early/Sustained	NA	NA	NA	0.46767	0.559628	Early/Sustained
441	gene:ENSG00000145782:t:115173311-115173461	ATG12	-0.0299054	0.34923	Late_change	0.189378	0.239277	Early/Sustained	0.0715099	0.429003	Late_change
442	gene:ENSG00000145868:s:147805085-147805264	FBXO38	-0.00255446	0.363047	Late_change	0.0801821	0.463306	Late_change	0.010064	0.0360099	Late_change
443	gene:ENSG00000145868:t:147812987-147813087	FBXO38	-0.000205344	0.186376	Late_change	0.0649788	0.383095	Late_change	0.00495283	0.0138818	Late_change
444	gene:ENSG00000146112:t:30652185-30654352	PPP1R18	-0.0112935	0.310736	Late_change	0.00419653	0.263824	Late_change	0.0115865	0.26517	Late_change
445	gene:ENSG00000146540:t:1049586-1049803	C7orf50	0.132331	0.460302	Early/Sustained	0.504664	0.465143	Early/Sustained	0.319446	0.342776	Early/Sustained
446	gene:ENSG00000147010:t:19764436-19764571	SH3KBP1	0.0534191	-0.41061	Late_change	-0.0107738	-0.513049	Late_change	-0.0418632	-0.531546	Late_change
447	gene:ENSG00000147044:s:41418750-41419100	CASK	0.0589461	-0.617883	Late_change	0.00440658	-0.439993	Late_change	NA	NA	NA
448	gene:ENSG00000147044:t:41412972-41413168	CASK	0.104666	-0.599446	Early/transient	-0.0157913	-0.297593	Late_change	NA	NA	NA
449	gene:ENSG00000147121:t:46332185-46334074	KRBOX4	-0.198383	0.400191	Early/transient	NA	NA	NA	0.0495451	0.420614	Late_change
450	gene:ENSG00000147274:t:135955608-135956988	RBMX	0.0704808	-0.192309	Late_change	0.017157	-0.18905	Late_change	-0.113846	-0.232279	Early/Sustained
451	gene:ENSG00000147535:s:38123659-38123829	PPAPDC1B	0.00769409	0.330495	Late_change	0.00478904	0.0282896	Late_change	0.0129401	0.199707	Late_change
452	gene:ENSG00000147996:s:70473437-70473500	CBWD5	0.191238	0.393905	Early/Sustained	NA	NA	NA	NA	NA	NA
453	gene:ENSG00000148120:t:97848964-97849441	C9orf3	-0.108446	0.514279	Early/transient	NA	NA	NA	NA	NA	NA
454	gene:ENSG00000148399:t:140469204-140469298	DPH7	-0.0103273	0.459796	Late_change	0.491381	0.640564	Early/Sustained	NA	NA	NA
455	gene:ENSG00000148481:s:15883425-15883598	FAM188A	0.070393	0.500723	Late_change	0.263491	0.475888	Early/Sustained	NA	NA	NA
456	gene:ENSG00000148481:t:15879203-15879317	FAM188A	0.246003	0.455957	Early/Sustained	0.239148	0.464215	Early/Sustained	0.046867	0.574463	Late_change
457	gene:ENSG00000148950:s:31531062-31531192	IMMP1L	0.0139096	-0.374504	Late_change	-0.0534694	-0.106111	Late_change	-0.210842	-0.292825	Early/Sustained
458	gene:ENSG00000149292:s:113235557-113235839	TTC12	0.278093	-0.429304	Early/transient	-0.0256983	-0.0998536	Late_change	-0.248751	-0.635697	Early/Sustained
459	gene:ENSG00000149489:t:62381730-62381976	ROM1	0.00853492	0.419986	Late_change	0.0162873	0.305755	Late_change	0.010197	0.228754	Late_change
460	gene:ENSG00000150527:s:39788413-39788495	CTAGE5	0.242371	-0.249644	Early/transient	0.156384	-0.391783	Early/transient	-0.0057741	-0.0628864	Late_change
461	gene:ENSG00000151327:t:35515711-35515834	FAM177A1	0.105954	0.471607	Early/Sustained	-0.00505668	0.504361	Late_change	0.0230044	0.264916	Late_change
462	gene:ENSG00000151376:t:86161343-86161440	ME3	0.00156828	-0.544774	Late_change	NA	NA	NA	-0.0318147	-0.392121	Late_change
463	gene:ENSG00000151806:s:44688527-44688730	GUF1	-0.00717308	0.28274	Late_change	0.0504077	0.488723	Late_change	0.215502	0.419765	Early/Sustained
464	gene:ENSG00000151806:t:44691303-44691426	GUF1	-0.0278065	0.437961	Late_change	0.0848078	0.726072	Late_change	0.0145312	0.498434	Late_change
465	gene:ENSG00000152061:t:174780970-174781098	RABGAP1L	0.195645	-0.402095	Early/transient	0.00522604	-0.451363	Late_change	-0.250247	-0.346441	Early/Sustained
466	gene:ENSG00000152464:s:15139179-15139408	RPP38	-0.0143752	0.331818	Late_change	0.0652466	5.35e-05	Late_change	0.0672413	-0.325376	Late_change
467	gene:ENSG00000152475:s:58881084-58881295	ZNF837	0.00474154	-0.617084	Late_change	0.0292151	-0.509747	Late_change	0.0318873	-0.344191	Late_change
468	gene:ENSG00000152601:s:151985829-151986881	MBNL1	0.0175036	0.329129	Late_change	0.222311	0.369531	Early/Sustained	NA	NA	NA
469	gene:ENSG00000152601:t:152132730-152132900	MBNL1	0.000564289	0.303764	Late_change	-0.00211058	0.297732	Late_change	NA	NA	NA
470	gene:ENSG00000153029:s:181019147-181019422	MR1	-0.000738898	0.310355	Late_change	0.0111246	0.0394136	Late_change	0.204733	0.422505	Early/Sustained
471	gene:ENSG00000153310:t:130915550-130915627	FAM49B	-0.0560725	-0.326099	Late_change	-0.0680628	-0.330269	Late_change	-0.308921	-0.435253	Early/Sustained
472	gene:ENSG00000153310:t:130916745-130916831	FAM49B	-0.0175185	-0.457412	Late_change	-0.0239031	-0.49226	Late_change	0.0190438	-0.516287	Late_change
473	gene:ENSG00000153487:t:111371576-111373421	ING1	-0.0385077	-0.205564	Late_change	-0.00572508	-0.314003	Late_change	-0.241753	-0.30386	Early/Sustained
474	gene:ENSG00000153827:t:230744698-230744844	TRIP12	0.181655	-0.193202	Early/transient	0.384804	0.463732	Early/Sustained	0.00168525	0.269887	Late_change
475	gene:ENSG00000155158:t:15267912-15267946	TTC39B	0.032825	0.299776	Late_change	-0.0783804	0.44225	Late_change	0.0211166	0.424481	Late_change
476	gene:ENSG00000156398:s:104488188-104488286	SFXN2	-0.0201097	0.31808	Late_change	-0.0660903	0.462736	Late_change	0.0222615	0.531157	Late_change
477	gene:ENSG00000156500:s:133941223-133941481	FAM122C	0.0100083	-0.391491	Late_change	0.461798	0.427398	Early/Sustained	NA	NA	NA
478	gene:ENSG00000156500:t:133941567-133941738	FAM122C	-0.00995331	-0.0737697	Late_change	-0.349726	-0.585029	Early/Sustained	-0.744204	-0.656204	Early/Sustained
479	gene:ENSG00000156858:t:30662453-30662997	PRR14	-0.00653991	0.532154	Late_change	0.0354522	0.690046	Late_change	0.0337489	0.606122	Late_change
480	gene:ENSG00000156873:s:30762427-30762625	PHKG2	-0.0472521	0.339996	Late_change	-0.00794618	0.0107617	Late_change	-0.0275683	0.289838	Late_change
481	gene:ENSG00000156976:s:186505543-186505671	EIF4A2	-0.154905	-0.440811	Early/Sustained	-0.232303	-0.396689	Early/Sustained	-0.307491	-0.27508	Early/Sustained
482	gene:ENSG00000156976:t:186506914-186507689	EIF4A2	-0.0681366	-0.248719	Late_change	-0.14216	-0.22769	Early/Sustained	-0.23692	-0.130403	Early/Sustained
483	gene:ENSG00000157216:s:54747111-54747200	SSBP3	-0.0196361	-0.206093	Late_change	-0.000472645	-0.200364	Late_change	-0.0501555	-0.00148889	Late_change
484	gene:ENSG00000157881:t:2442117-2442285	PANK4	-0.0127638	0.273783	Late_change	0.237121	-0.000957178	Early/transient	-0.0563394	0.287531	Late_change
485	gene:ENSG00000157954:s:5229819-5230347	WIPI2	0.106949	0.342191	Early/Sustained	0.0691203	0.391295	Late_change	0.0228902	0.378619	Late_change
486	gene:ENSG00000157954:t:5239207-5239289	WIPI2	-0.0112295	-0.273522	Late_change	0.00724836	-0.385386	Late_change	-0.00978601	-0.263395	Late_change
487	gene:ENSG00000158062:s:26611135-26612032	UBXN11	-0.255873	-0.394523	Early/Sustained	-0.357129	-0.161325	Early/transient	-0.183906	-0.244025	Early/Sustained
488	gene:ENSG00000158062:t:26610853-26611048	UBXN11	-0.278862	-0.396646	Early/Sustained	NA	NA	NA	-0.209007	-0.247836	Early/Sustained
489	gene:ENSG00000158234:t:138347949-138347998	FAIM	0.0157413	0.416096	Late_change	-0.000939377	0.320022	Late_change	NA	NA	NA
490	gene:ENSG00000158435:t:101885678-101886778	CNOT11	-0.031227	0.0617131	Late_change	0.00201646	0.297387	Late_change	-0.00135192	0.311701	Late_change
491	gene:ENSG00000158792:t:89767338-89767641	SPATA2L	0.0162957	-0.00957279	Late_change	-0.0260704	-0.410643	Late_change	-0.0110857	-0.387873	Late_change
492	gene:ENSG00000158864:s:161183654-161183843	NDUFS2	0.0254627	0.316605	Late_change	0.0949909	0.365047	Late_change	0.310656	0.24926	Early/Sustained
493	gene:ENSG00000158864:t:161183946-161184185	NDUFS2	0.0299413	0.236571	Late_change	0.0752342	0.18015	Late_change	0.248012	0.20872	Early/Sustained
494	gene:ENSG00000159023:t:29313943-29314417	EPB41	-0.0581894	-0.497842	Late_change	-0.298707	-0.469942	Early/Sustained	-0.540247	-0.519456	Early/Sustained
495	gene:ENSG00000159079:s:33974579-33974733	C21orf59	0.0112259	0.143582	Late_change	0.117275	0.287582	Early/Sustained	NA	NA	NA
496	gene:ENSG00000159086:t:34123430-34123529	PAXBP1	-0.0745141	0.527697	Late_change	0.283805	0.368778	Early/Sustained	0.00179844	0.436628	Late_change
497	gene:ENSG00000159322:s:73075587-73076126	ADPGK	0.0154655	0.252085	Late_change	0.0067624	0.329958	Late_change	-0.000834527	0.296686	Late_change
498	gene:ENSG00000159322:t:73067213-73067438	ADPGK	0.00818868	0.339275	Late_change	-0.00250412	0.274715	Late_change	0.015315	0.31662	Late_change
499	gene:ENSG00000159445:s:151867306-151867670	THEM4	-0.0221408	-0.542866	Late_change	-0.0370199	-0.71936	Late_change	-0.395692	-0.389174	Early/Sustained
500	gene:ENSG00000159445:t:151861690-151861849	THEM4	-0.00453418	-0.531801	Late_change	-0.00374837	-0.675497	Late_change	-0.351281	-0.322868	Early/Sustained
501	gene:ENSG00000159592:t:46151248-46151302	GPBP1L1	-0.0257302	-0.269367	Late_change	0.00484606	-0.337265	Late_change	-0.0187026	-0.157317	Late_change
502	gene:ENSG00000159596:s:46152886-46154104	TMEM69	-0.0992384	-0.297444	Late_change	-0.115516	-0.388414	Early/Sustained	-0.0653804	-0.447697	Late_change
503	gene:ENSG00000159596:t:46158876-46160115	TMEM69	0.0206488	0.265893	Late_change	0.102189	0.302843	Early/Sustained	0.0161309	0.500445	Late_change
504	gene:ENSG00000160439:t:55555711-55556677	RDH13	0.0414133	0.363722	Late_change	0.00299974	0.25951	Late_change	0.166487	0.234217	Early/Sustained
505	gene:ENSG00000160593:t:118085539-118085606	AMICA1	-0.0290704	-0.290692	Late_change	-0.116452	-0.366531	Early/Sustained	-0.28842	-0.19518	Early/Sustained
506	gene:ENSG00000160685:t:154982734-154982894	ZBTB7B	0.145273	0.423505	Early/Sustained	NA	NA	NA	0.378099	0.631944	Early/Sustained
507	gene:ENSG00000160685:t:154986924-154988549	ZBTB7B	-0.335272	-0.406821	Early/Sustained	-0.334228	-0.615254	Early/Sustained	-0.512761	-0.280556	Early/Sustained
508	gene:ENSG00000160710:t:154573517-154575102	ADAR	0.00562478	-0.249459	Late_change	0.0173125	-0.0181448	Late_change	-0.145662	-0.264234	Early/Sustained
509	gene:ENSG00000160813:s:100033471-100033687	PPP1R35	-0.0445828	-0.209293	Late_change	-0.0370899	-0.191658	Late_change	-0.0438521	-0.033555	Late_change
510	gene:ENSG00000160953:s:1358393-1358463	MUM1	0.208383	0.444704	Early/Sustained	-0.163235	0.320425	Early/transient	-0.0232503	0.105063	Late_change
511	gene:ENSG00000160953:t:1356320-1356448	MUM1	0.001335	0.332742	Late_change	NA	NA	NA	-0.000539773	0.362553	Late_change
512	gene:ENSG00000161091:t:3538259-3538776	MFSD12	-0.0104318	-0.505008	Late_change	0.0102679	-0.591824	Late_change	-0.0445381	-0.498738	Late_change
513	gene:ENSG00000161267:s:197273232-197273357	BDH1	-0.0289229	0.324576	Late_change	-0.206906	-0.0329322	Early/transient	-0.0208199	0.288416	Late_change
514	gene:ENSG00000161267:t:197260356-197260432	BDH1	-0.311869	0.263211	Early/transient	-0.509511	0.224141	Early/transient	-0.0425086	0.314931	Late_change
515	gene:ENSG00000161513:s:72868894-72869156	FDXR	0.00491034	0.431387	Late_change	NA	NA	NA	NA	NA	NA
516	gene:ENSG00000161513:t:72868161-72868258	FDXR	0.10846	0.506199	Early/Sustained	NA	NA	NA	NA	NA	NA
517	gene:ENSG00000161547:s:74732236-74732546	SRSF2	0.235551	0.590207	Early/Sustained	0.354668	0.577186	Early/Sustained	0.49241	0.587427	Early/Sustained
518	gene:ENSG00000161547:t:74730197-74731240	SRSF2	0.312148	0.437573	Early/Sustained	0.347553	0.457916	Early/Sustained	0.543965	0.529975	Early/Sustained
519	gene:ENSG00000162441:t:10002682-10002840	LZIC	-0.0317367	-0.448747	Late_change	-0.0219628	-0.0931553	Late_change	0.506015	-0.413708	Early/transient
520	gene:ENSG00000162585:t:2115917-2117045	C1orf86	-0.240546	0.391481	Early/transient	NA	NA	NA	NA	NA	NA
521	gene:ENSG00000162639:t:109202486-109202584	HENMT1	0.0627558	-0.46528	Late_change	-0.0810296	-0.459925	Late_change	NA	NA	NA
522	gene:ENSG00000162642:s:85725041-85725325	C1orf52	0.0837548	0.297674	Late_change	0.172769	0.423486	Early/Sustained	0.085141	0.253635	Late_change
523	gene:ENSG00000162642:t:85724202-85724558	C1orf52	0.0512847	0.155772	Late_change	0.150171	0.371617	Early/Sustained	0.138098	0.313222	Early/Sustained
524	gene:ENSG00000162910:s:228296138-228296598	MRPL55	-0.00678069	-0.379755	Late_change	-0.026921	-0.212162	Late_change	0.000611363	-0.381465	Late_change
525	gene:ENSG00000162910:t:228295936-228296022	MRPL55	-0.00985369	-0.176506	Late_change	-0.103595	-0.0621022	Early/Sustained	-0.115267	-0.225763	Early/Sustained
526	gene:ENSG00000162971:s:200813041-200813195	TYW5	0.00556924	-0.468399	Late_change	NA	NA	NA	-0.0683283	-0.42874	Late_change
527	gene:ENSG00000162971:t:200808488-200808557	TYW5	-0.00541296	0.415849	Late_change	NA	NA	NA	0.0681726	0.453494	Late_change
528	gene:ENSG00000163157:t:151142462-151142579	TMOD4	-0.0541737	-0.607164	Late_change	-0.721461	-0.606219	Early/Sustained	NA	NA	NA
529	gene:ENSG00000163322:s:84406139-84406334	FAM175A	0.0930763	-0.127509	Late_change	-0.163089	-0.549334	Early/Sustained	0.289579	-0.301324	Early/transient
530	gene:ENSG00000163444:s:202984865-202985268	TMEM183A	0.0347166	0.203009	Late_change	-0.0202958	0.207349	Late_change	0.026671	0.168878	Late_change
531	gene:ENSG00000163635:t:63965591-63965843	ATXN7	0.17264	0.479825	Early/Sustained	0.469086	0.886833	Early/Sustained	0.580389	0.769438	Early/Sustained
532	gene:ENSG00000163684:s:58291989-58292378	RPP14	0.0664259	-0.556992	Late_change	-0.399358	-0.335618	Early/Sustained	-0.226722	-0.465601	Early/Sustained
533	gene:ENSG00000163684:t:58296017-58296133	RPP14	0.164361	0.425691	Early/Sustained	0.119918	0.203961	Early/Sustained	0.31818	0.702304	Early/Sustained
534	gene:ENSG00000163684:t:58296234-58296318	RPP14	0.0486797	-0.579713	Late_change	-0.321125	-0.440534	Early/Sustained	-0.308303	-0.50881	Early/Sustained
535	gene:ENSG00000163728:t:180326489-180326669	TTC14	0.0096056	-0.482935	Late_change	0.000665614	-0.259001	Late_change	-0.254233	-0.256067	Early/Sustained
536	gene:ENSG00000163867:t:35496148-35496357	ZMYM6	0.0447952	0.64605	Late_change	0.564918	0.639065	Early/Sustained	0.636739	0.0476301	Early/transient
537	gene:ENSG00000163935:t:53003117-53003274	SFMBT1	-0.0221795	0.550149	Late_change	NA	NA	NA	0.0977096	0.343987	Late_change
538	gene:ENSG00000164494:s:107595233-107595431	PDSS2	0.0814646	0.404898	Late_change	-0.0111413	0.708124	Late_change	0.226797	-0.206374	Early/transient
539	gene:ENSG00000164548:s:23571408-23571660	TRA2A	0.000432752	0.276761	Late_change	0.0661364	0.186507	Late_change	0.364954	0.494223	Early/Sustained
540	gene:ENSG00000164548:t:23561326-23561459	TRA2A	0.0586354	0.369746	Late_change	0.177217	0.208361	Early/Sustained	0.245495	0.364571	Early/Sustained
541	gene:ENSG00000164823:t:90921795-90921949	OSGIN2	-0.00554505	-0.00776377	Late_change	0.0175038	0.56888	Late_change	0.709623	0.627614	Early/Sustained
542	gene:ENSG00000165138:s:101558293-101558821	ANKS6	0.0340654	-0.517188	Late_change	NA	NA	NA	NA	NA	NA
543	gene:ENSG00000165138:t:101493611-101494835	ANKS6	-0.00424128	0.23622	Late_change	0.00864093	0.37726	Late_change	0.343393	0.384172	Early/Sustained
544	gene:ENSG00000165138:t:101547114-101547158	ANKS6	-0.163648	0.456257	Early/transient	0.0697912	0.636636	Late_change	-0.0264419	0.0277831	Late_change
545	gene:ENSG00000165233:s:95872850-95873477	C9orf89	0.112393	0.266628	Early/Sustained	-0.0579699	0.299264	Late_change	0.0330746	0.196503	Late_change
546	gene:ENSG00000165233:t:95874500-95874571	C9orf89	0.165391	0.300047	Early/Sustained	-0.0729024	0.315738	Late_change	0.055286	0.178934	Late_change
547	gene:ENSG00000165359:s:134703262-134703356	DDX26B	-0.38612	-0.443837	Early/Sustained	-0.460468	-0.131028	Early/transient	-0.113777	-0.4781	Early/Sustained
548	gene:ENSG00000165359:t:134706740-134706958	DDX26B	-0.373646	-0.505966	Early/Sustained	-0.0976481	-0.184383	Late_change	-0.312662	-0.529658	Early/Sustained
549	gene:ENSG00000165689:s:139304746-139305061	SDCCAG3	0.0149311	0.233025	Late_change	0.00950523	0.011024	Late_change	0.0724762	0.287555	Late_change
550	gene:ENSG00000165689:t:139302278-139302390	SDCCAG3	0.0933324	0.225848	Late_change	-0.00261095	0.0119598	Late_change	0.187684	0.254131	Early/Sustained
551	gene:ENSG00000165792:t:21460251-21460364	METTL17	-0.0504377	-0.340911	Late_change	-0.0559034	-0.286979	Late_change	NA	NA	NA
552	gene:ENSG00000166169:t:103347003-103347206	POLL	0.00890979	-0.612602	Late_change	NA	NA	NA	0.040588	-0.63539	Late_change
553	gene:ENSG00000166801:s:58910970-58912534	FAM111A	0.000759064	-0.497824	Late_change	0.526113	-0.538956	Early/transient	-0.00603957	-0.429316	Late_change
554	gene:ENSG00000166801:t:58912536-58913329	FAM111A	-0.020183	0.449881	Late_change	-0.388237	0.512997	Early/transient	0.00723081	0.392064	Late_change
555	gene:ENSG00000166986:t:57910028-57910120	MARS	0.00030867	-0.229211	Late_change	NA	NA	NA	-0.0911997	-0.33568	Late_change
556	gene:ENSG00000167081:t:128677965-128678206	PBX3	-0.011508	0.423267	Late_change	NA	NA	NA	NA	NA	NA
557	gene:ENSG00000167130:s:131847797-131847895	DOLPP1	-0.0716177	0.118338	Late_change	0.0765129	0.332601	Late_change	-0.012015	0.370378	Late_change
558	gene:ENSG00000167130:t:131848988-131849077	DOLPP1	-0.0110808	0.239348	Late_change	0.0408386	0.447382	Late_change	-0.00578811	0.443218	Late_change
559	gene:ENSG00000167186:t:19083106-19083553	COQ7	0.092114	0.381564	Late_change	0.0320854	0.451252	Late_change	0.159137	0.405229	Early/Sustained
560	gene:ENSG00000167280:t:77079081-77079205	ENGASE	-0.00289755	0.498214	Late_change	0.00472277	0.46311	Late_change	0.0164363	0.021251	Late_change
561	gene:ENSG00000167286:s:118210985-118211308	CD3D	-0.0534868	-0.207301	Late_change	-0.115302	-0.199182	Early/Sustained	-0.0942465	-0.144263	Late_change
562	gene:ENSG00000167286:t:118210166-118210239	CD3D	-0.0281379	-0.272804	Late_change	-0.117518	-0.258468	Early/Sustained	-0.127446	-0.196561	Early/Sustained
563	gene:ENSG00000167523:s:89724510-89724829	SPATA33	-0.0327896	-0.434187	Late_change	NA	NA	NA	NA	NA	NA
564	gene:ENSG00000167645:t:38800045-38800563	YIF1B	0.0659325	-0.299782	Late_change	0.0101655	-0.316111	Late_change	0.015861	-0.284997	Late_change
565	gene:ENSG00000167895:s:76133316-76133442	TMC8	0.0713339	-0.236983	Late_change	-0.0113648	-0.341679	Late_change	-0.230333	-0.246006	Early/Sustained
566	gene:ENSG00000167895:t:76133692-76133895	TMC8	0.0656863	-0.233141	Late_change	-0.00999586	-0.349681	Late_change	-0.232577	-0.250093	Early/Sustained
567	gene:ENSG00000168036:s:41280625-41280845	CTNNB1	0.00857247	-0.239091	Late_change	-0.0318659	-0.11805	Late_change	-0.0435066	-0.399287	Late_change
568	gene:ENSG00000168061:s:64808717-64809400	SAC3D1	-0.00809328	0.0143253	Late_change	-0.0424075	-0.450544	Late_change	-0.0296071	-0.367555	Late_change
569	gene:ENSG00000168061:t:64808717-64809400	SAC3D1	-0.01293	-0.390512	Late_change	-0.105679	-0.40267	Early/Sustained	-0.0284702	-0.431594	Late_change
570	gene:ENSG00000168096:t:4774751-4774832	ANKS3	-0.228552	-0.347417	Early/Sustained	-0.007757	-0.539802	Late_change	0.00604814	-0.0651551	Late_change
571	gene:ENSG00000168101:s:4743979-4744309	NUDT16L1	0.00345878	0.409539	Late_change	0.0116407	0.421322	Late_change	0.147533	0.4016	Early/Sustained
572	gene:ENSG00000168101:t:4744959-4745860	NUDT16L1	0.00696243	0.368059	Late_change	0.00135188	0.457627	Late_change	0.0585006	0.390972	Late_change
573	gene:ENSG00000168237:s:52326276-52327021	GLYCTK	0.00510194	-0.230123	Late_change	0.0270127	-0.151051	Late_change	-0.0118851	-0.248952	Late_change
574	gene:ENSG00000168237:t:52327062-52327208	GLYCTK	0.0185694	-0.263216	Late_change	0.0105988	-0.102842	Late_change	-0.0213437	-0.252539	Late_change
575	gene:ENSG00000168404:s:74712797-74713006	MLKL	-0.0314589	0.330735	Late_change	0.14491	0.0139283	Early/transient	0.00658414	0.304071	Late_change
576	gene:ENSG00000168404:t:74709511-74709662	MLKL	-0.0372344	-0.339827	Late_change	-0.0380047	-0.398894	Late_change	0.0256995	-0.498145	Late_change
577	gene:ENSG00000168488:s:28847254-28847497	ATXN2L	0.0829103	-0.268836	Late_change	-0.126014	-0.241192	Early/Sustained	-0.149188	-0.12091	Early/Sustained
578	gene:ENSG00000168488:t:28847616-28847811	ATXN2L	-0.00637731	-0.226014	Late_change	-0.0877031	-0.29284	Late_change	-0.112221	-0.108993	Early/Sustained
579	gene:ENSG00000168564:t:184367241-184369351	CDKN2AIP	0.117858	-0.101671	Early/transient	-0.30449	-0.282543	Early/Sustained	-0.0365807	-0.313064	Late_change
580	gene:ENSG00000168904:t:99926235-99930934	LRRC28	0.0910965	0.399968	Late_change	-0.124155	-0.088369	Early/Sustained	0.0991628	0.363634	Late_change
581	gene:ENSG00000169084:s:2326786-2326854	DHRSX	-0.018849	-0.34479	Late_change	-0.0375043	-0.378534	Late_change	-0.00919107	-0.0454483	Late_change
582	gene:ENSG00000169241:s:155108722-155108872	SLC50A1	-0.0324112	-0.37543	Late_change	-0.198367	-0.268817	Early/Sustained	-0.15301	-0.0481368	Early/transient
583	gene:ENSG00000169241:t:155110014-155110198	SLC50A1	-0.00485635	0.31858	Late_change	0.105589	0.300796	Early/Sustained	0.315913	0.0577082	Early/transient
584	gene:ENSG00000169398:s:142011224-142011384	PTK2	0.405065	-0.461041	Early/transient	0.0764762	-0.580173	Late_change	0.243766	0.0165935	Early/transient
585	gene:ENSG00000169490:s:38853732-38854052	TM2D2	0.268486	0.2572	Early/Sustained	-0.00168961	0.264917	Late_change	0.00820703	0.0520586	Late_change
586	gene:ENSG00000169490:t:38852835-38853313	TM2D2	0.299144	0.251198	Early/Sustained	-0.00172709	0.25325	Late_change	0.011216	0.0544989	Late_change
587	gene:ENSG00000169727:t:80010109-80010335	GPS1	-0.00430612	-0.533479	Late_change	0.0115098	-0.619301	Late_change	-0.304468	-0.254766	Early/Sustained
588	gene:ENSG00000169756:t:109276061-109276220	LIMS1	0.437268	-0.564897	Early/transient	-0.271672	-0.627342	Early/Sustained	-0.0189595	-0.671284	Late_change
589	gene:ENSG00000169919:s:65445127-65445424	GUSB	0.0309648	0.0833606	Late_change	-0.0196146	0.249988	Late_change	-0.035902	0.231895	Late_change
590	gene:ENSG00000169926:t:31664213-31670102	KLF13	-0.00582031	0.191583	Late_change	-0.00011025	0.234456	Late_change	NA	NA	NA
591	gene:ENSG00000170473:s:56321509-56321697	WIBG	0.019449	0.335585	Late_change	0.0157485	0.355496	Late_change	0.260392	0.326712	Early/Sustained
592	gene:ENSG00000170638:t:50631424-50631801	TRABD	-0.0229719	-0.32194	Late_change	-0.259903	-0.219756	Early/Sustained	-0.25258	-0.277962	Early/Sustained
593	gene:ENSG00000170949:t:53589515-53589609	ZNF160	-0.273884	-0.0184621	Early/transient	0.0490631	0.414464	Late_change	NA	NA	NA
594	gene:ENSG00000171204:s:85339629-85339732	TMEM126B	-0.272667	-0.125257	Early/transient	-0.0263156	-0.236063	Late_change	-0.216142	-0.279589	Early/Sustained
595	gene:ENSG00000171456:s:30956815-30956926	ASXL1	-0.0123022	0.228252	Late_change	-0.0142496	0.24793	Late_change	0.225565	0.312569	Early/Sustained
596	gene:ENSG00000171456:t:31019124-31019287	ASXL1	-0.225755	-0.395075	Early/Sustained	-0.0713818	-0.360419	Late_change	-0.0466608	-0.391657	Late_change
597	gene:ENSG00000171476:t:57522023-57522178	HOPX	-0.26701	-0.043553	Early/transient	-0.449252	-0.380297	Early/Sustained	-0.445593	-0.434099	Early/Sustained
598	gene:ENSG00000171634:s:65870933-65871136	BPTF	0.0750494	-0.288891	Late_change	-0.0138835	-0.301629	Late_change	-0.386082	-0.0366666	Early/transient
599	gene:ENSG00000171824:s:11137387-11137523	EXOSC10	0.00273579	-0.225764	Late_change	-0.0912114	-0.366867	Late_change	-0.183792	-0.241142	Early/Sustained
600	gene:ENSG00000171824:t:11136899-11137005	EXOSC10	-0.00629342	0.261739	Late_change	NA	NA	NA	0.185721	0.291866	Early/Sustained
601	gene:ENSG00000172366:s:692120-692249	FAM195A	0.0984655	0.213763	Late_change	-0.0105627	0.155843	Late_change	0.0304123	0.383424	Late_change
602	gene:ENSG00000172671:t:46113584-46113708	ZFAND4	-0.0148898	-0.266226	Late_change	-0.0662118	-0.68221	Late_change	-0.0942338	-0.49843	Late_change
603	gene:ENSG00000172775:n:57207582-57207793	FAM192A	-0.0341566	0.260935	Late_change	0.0189355	0.321211	Late_change	0.0835379	0.248548	Late_change
604	gene:ENSG00000172819:t:53609426-53609578	RARG	-0.0968191	-0.419681	Late_change	-0.142057	-0.225718	Early/Sustained	-0.329665	-0.376979	Early/Sustained
605	gene:ENSG00000172890:t:71191801-71191925	NADSYN1	-0.073937	0.315274	Late_change	-0.0857624	0.373391	Late_change	-0.141728	0.014462	Early/transient
606	gene:ENSG00000172932:s:67057764-67057917	ANKRD13D	-0.0607232	0.227247	Late_change	-0.0520412	0.374716	Late_change	0.0838884	0.380345	Late_change
607	gene:ENSG00000173209:s:61408455-61408540	AHSA2	0.00660438	0.19519	Late_change	0.0140365	0.279668	Late_change	0.0304237	0.28157	Late_change
608	gene:ENSG00000173209:t:61411847-61412059	AHSA2	0.0184105	-0.169584	Late_change	-0.00682219	-0.260188	Late_change	-0.029462	-0.395445	Late_change
609	gene:ENSG00000173566:s:21965578-21965883	NUDT18	0.205406	0.259771	Early/Sustained	0.0387416	0.2794	Late_change	-0.0828932	0.0796598	Late_change
610	gene:ENSG00000173581:s:56159380-56159647	CCDC106	-0.00150061	-0.671939	Late_change	NA	NA	NA	NA	NA	NA
611	gene:ENSG00000173848:t:5493793-5493900	NET1	-0.00753825	-0.857125	Late_change	-0.0078601	-0.873125	Late_change	NA	NA	NA
612	gene:ENSG00000173875:s:12721732-12721896	ZNF791	-0.00386414	-0.318525	Late_change	-8.53e-05	-0.0607942	Late_change	-0.00752174	-0.236055	Late_change
613	gene:ENSG00000174165:s:66311175-66311452	ZDHHC24	-0.00950727	0.207097	Late_change	0.00576226	0.0788742	Late_change	0.131235	0.377732	Early/Sustained
614	gene:ENSG00000174353:s:72473538-72473679	STAG3L3	-0.0511047	0.32632	Late_change	0.0465911	0.304394	Late_change	0.216164	0.127962	Early/Sustained
615	gene:ENSG00000174485:t:65989601-65989721	DENND4A	0.0164128	0.548934	Late_change	NA	NA	NA	0.183712	0.588831	Early/Sustained
616	gene:ENSG00000174579:t:135867764-135871580	MSL2	-0.0679929	0.233881	Late_change	-0.0138931	0.120663	Late_change	0.0314523	0.223343	Late_change
617	gene:ENSG00000174720:t:113565824-113566027	LARP7	-0.070085	-0.396076	Late_change	-0.350598	-0.265032	Early/Sustained	-0.445147	-0.245586	Early/Sustained
618	gene:ENSG00000174775:s:533453-533612	HRAS	-0.117838	-0.520699	Early/Sustained	-0.246987	-0.515697	Early/Sustained	-0.38295	-0.489819	Early/Sustained
619	gene:ENSG00000174775:t:532631-532755	HRAS	0.0928003	0.430825	Late_change	0.119563	0.466276	Early/Sustained	0.38541	0.582819	Early/Sustained
620	gene:ENSG00000174915:t:460187-460288	PTDSS2	0.0452637	0.45919	Late_change	0.0189754	0.0179134	Late_change	0.474247	0.290846	Early/Sustained
621	gene:ENSG00000175395:s:38245915-38246043	ZNF25	-0.00421313	0.348301	Late_change	0.0542708	0.0162664	Late_change	0.00132347	0.359261	Late_change
622	gene:ENSG00000175634:t:67200811-67201178	RPS6KB2	-0.0331315	0.27157	Late_change	0.0120026	0.39901	Late_change	-0.0399336	0.255873	Late_change
623	gene:ENSG00000175866:s:79082275-79082627	BAIAP2	0.0804828	-0.636873	Late_change	-0.0397075	0.0113522	Late_change	-0.0636867	-0.30482	Late_change
624	gene:ENSG00000176155:t:80059566-80059742	CCDC57	-0.0452538	-0.245769	Late_change	-0.011455	-0.276464	Late_change	-0.0112389	-0.138193	Late_change
625	gene:ENSG00000176371:s:85147051-85147611	ZSCAN2	-0.00501792	-0.0126311	Late_change	-0.121363	-0.520148	Early/Sustained	NA	NA	NA
626	gene:ENSG00000176700:t:85180578-85180651	SCAND2P	0.0043931	0.43218	Late_change	NA	NA	NA	-0.342493	0.749652	Early/transient
627	gene:ENSG00000176715:s:89160217-89160404	ACSF3	-0.00819258	-0.358486	Late_change	-0.00775301	-0.335229	Late_change	0.103942	-0.38872	Early/transient
628	gene:ENSG00000176715:t:89169012-89169056	ACSF3	-0.00234759	-0.146413	Late_change	-0.00567286	-0.279161	Late_change	-0.0136753	-0.344482	Late_change
629	gene:ENSG00000176731:s:86129615-86129978	C8orf59	0.0196706	0.277088	Late_change	0.074079	0.299339	Late_change	NA	NA	NA
630	gene:ENSG00000176731:t:86126311-86126860	C8orf59	0.0137797	0.35155	Late_change	0.125309	0.365304	Early/Sustained	NA	NA	NA
631	gene:ENSG00000176946:t:242545729-242545888	THAP4	-0.0381262	0.147581	Late_change	-0.191188	0.339049	Early/transient	0.0548581	0.283492	Late_change
632	gene:ENSG00000177479:s:48964895-48965246	ARIH2	-0.00062824	-0.243164	Late_change	-0.00227293	-0.059666	Late_change	0.00325462	-0.362123	Late_change
633	gene:ENSG00000177479:t:48982415-48982614	ARIH2	-0.0311603	-0.198433	Late_change	0.00260035	-0.339598	Late_change	-0.0283406	-0.399665	Late_change
634	gene:ENSG00000177595:t:804094-804469	PIDD	-0.444396	0.482827	Early/transient	0.00425886	0.373822	Late_change	-0.234988	0.441087	Early/transient
635	gene:ENSG00000178623:t:241568795-241570676	GPR35	0.0508305	0.629225	Late_change	NA	NA	NA	0.282778	0.788539	Early/Sustained
636	gene:ENSG00000178694:s:93781760-93781982	NSUN3	-0.00512211	-0.0741347	Late_change	-0.00180548	-0.456702	Late_change	-0.226245	-0.452549	Early/Sustained
637	gene:ENSG00000178773:t:89662892-89663654	CPNE7	0.000879073	0.0273557	Late_change	-0.0195953	-0.458213	Late_change	NA	NA	NA
638	gene:ENSG00000178951:t:4053969-4055245	ZBTB7A	-0.123672	-0.506276	Early/Sustained	-0.353133	-0.585577	Early/Sustained	-0.316478	-0.392747	Early/Sustained
639	gene:ENSG00000179832:s:145297114-145297418	MROH1	-0.00965779	-0.40441	Late_change	-0.00729616	-0.0923752	Late_change	0.0245513	-0.649612	Late_change
640	gene:ENSG00000179832:t:145298109-145298551	MROH1	-0.0202237	-0.384883	Late_change	-0.00207255	-0.0190452	Late_change	0.00216213	-0.670246	Late_change
641	gene:ENSG00000179950:s:144911450-144912029	PUF60	0.0203533	0.252356	Late_change	0.0170091	0.226823	Late_change	0.0449141	0.168378	Late_change
642	gene:ENSG00000180773:t:92901110-92901337	SLC36A4	-0.00778939	-0.271335	Late_change	-0.0127146	-0.00200197	Late_change	-0.160439	-0.408476	Early/Sustained
643	gene:ENSG00000180902:t:242689566-242689709	D2HGDH	0.00601495	0.460051	Late_change	0.0024363	0.26187	Late_change	NA	NA	NA
644	gene:ENSG00000180979:t:42840549-42840654	LRRC57	0.00474361	0.229547	Late_change	-0.00010434	0.426314	Late_change	NA	NA	NA
645	gene:ENSG00000181404:t:18381-18496	XXyac-YRM2039.2	0.0351846	0.349169	Late_change	0.289898	0.331152	Early/Sustained	-0.0217651	0.0722189	Late_change
646	gene:ENSG00000181481:s:29311577-29311778	RNF135	-0.498756	-0.383293	Early/Sustained	-0.0103692	-0.379323	Late_change	NA	NA	NA
647	gene:ENSG00000182093:t:40762624-40762845	WRB	-0.000533057	0.517369	Late_change	0.0831912	0.502008	Late_change	-0.0757221	0.718773	Late_change
648	gene:ENSG00000182134:s:151746889-151746980	TDRKH	0.0210177	-0.333354	Late_change	-0.124481	-0.0125194	Early/transient	0.00447559	-0.354563	Late_change
649	gene:ENSG00000182196:s:123464607-123464980	ARL6IP4	-0.00548556	-0.622894	Late_change	NA	NA	NA	NA	NA	NA
650	gene:ENSG00000182287:t:15848182-15849691	AP1S2	0.00208177	0.400374	Late_change	0.137001	0.633357	Early/Sustained	NA	NA	NA
651	gene:ENSG00000182319:t:8196994-8197151	SGK223	0.0140183	-0.739345	Late_change	NA	NA	NA	-0.00142751	-0.664078	Late_change
652	gene:ENSG00000182473:s:74090495-74090662	EXOC7	-0.0491864	-0.459849	Late_change	-0.36826	-0.388647	Early/Sustained	-0.470256	-0.122879	Early/transient
653	gene:ENSG00000182473:t:74085256-74085401	EXOC7	-0.216141	-0.417606	Early/Sustained	-0.26364	-0.36676	Early/Sustained	-0.378088	0.00663985	Early/transient
654	gene:ENSG00000182518:t:55185550-55185661	FAM104B	-0.0556228	-0.0348614	Late_change	0.352544	-0.635107	Early/transient	-0.0203365	-0.502113	Late_change
655	gene:ENSG00000182568:t:18462248-18462880	SATB1	-0.0144504	-0.276906	Late_change	-0.0378494	-0.319151	Late_change	-0.190269	-0.430265	Early/Sustained
656	gene:ENSG00000182646:s:52986286-52986462	FAM156A	0.00037364	-0.234968	Late_change	0.00104653	-0.320844	Late_change	-0.00465226	-0.033611	Late_change
657	gene:ENSG00000182841:t:42973850-42973968	RRP7B	0.00434286	0.226712	Late_change	0.00859764	0.230678	Late_change	0.0319562	0.140861	Late_change
658	gene:ENSG00000182871:t:46899816-46899878	COL18A1	0.0101831	0.481989	Late_change	0.0528402	0.284986	Late_change	0.289777	0.328648	Early/Sustained
659	gene:ENSG00000182899:s:197676858-197677365	RPL35A	-0.0311827	-0.340374	Late_change	-0.0949532	-0.36393	Late_change	-0.0985335	-0.292046	Late_change
660	gene:ENSG00000182899:t:197677807-197677855	RPL35A	-0.0232681	-0.320628	Late_change	-0.0933655	-0.321928	Late_change	-0.125001	-0.283602	Early/Sustained
661	gene:ENSG00000183323:s:68616064-68616227	CCDC125	0.00391035	-0.397067	Late_change	NA	NA	NA	NA	NA	NA
662	gene:ENSG00000183495:t:132466638-132467023	EP400	0.0611516	0.282089	Late_change	0.486652	0.418736	Early/Sustained	0.00869499	0.2929	Late_change
663	gene:ENSG00000183624:t:128998553-128998758	HMCES	-0.191467	-0.438052	Early/Sustained	-0.163737	-0.345113	Early/Sustained	0.00891739	-0.280081	Late_change
664	gene:ENSG00000183696:s:48141421-48141583	UPP1	0.167677	0.259145	Early/Sustained	0.100023	0.194729	Early/Sustained	0.316667	0.252462	Early/Sustained
665	gene:ENSG00000184428:t:144413394-144413509	TOP1MT	0.0148533	0.255912	Late_change	0.106367	0.0589992	Early/Sustained	0.281167	0.254283	Early/Sustained
666	gene:ENSG00000184640:n:75478226-75480210	2022-09-09	0.00638208	0.251401	Late_change	0.012912	0.26497	Late_change	0.00231312	0.255607	Late_change
667	gene:ENSG00000184640:t:75398141-75398565	2022-09-09	0.0293232	-0.397639	Late_change	0.0348722	-0.493005	Late_change	NA	NA	NA
668	gene:ENSG00000184674:s:24384120-24384284	GSTT1	0.0080046	-0.314704	Late_change	-0.0230572	-0.439038	Late_change	NA	NA	NA
669	gene:ENSG00000185024:s:105718731-105718916	BRF1	-0.0240842	-0.28362	Late_change	-0.000392464	-0.348758	Late_change	-0.0001098	-0.0961958	Late_change
670	gene:ENSG00000185024:t:105695157-105695368	BRF1	0.00288441	-0.256903	Late_change	-0.0216787	-0.176682	Late_change	-0.0072729	-0.263575	Late_change
671	gene:ENSG00000185101:s:428088-428247	ANO9	0.0113857	-0.415834	Late_change	-0.0596957	-0.0994792	Late_change	0.0193016	-0.381988	Late_change
672	gene:ENSG00000185246:t:45566090-45566208	PRPF39	-0.0187068	0.00398702	Late_change	-0.00222843	0.495477	Late_change	0.0423215	0.446826	Late_change
673	gene:ENSG00000185404:s:231253274-231253348	SP140L	0.00333806	-0.215221	Late_change	0.00308469	-0.303266	Late_change	-0.0241613	-0.0809001	Late_change
674	gene:ENSG00000185404:t:231256802-231256944	SP140L	0.00527463	0.235399	Late_change	-0.000316865	0.252491	Late_change	0.0174871	0.137798	Late_change
675	gene:ENSG00000185504:t:79517274-79518229	C17orf70	-0.293041	-0.418488	Early/Sustained	-0.00715917	0.0237772	Late_change	-0.140965	-0.274423	Early/Sustained
676	gene:ENSG00000185596:t:102512786-102512897	WASH3P	0.0158167	0.272423	Late_change	0.0523779	0.254749	Late_change	0.0762607	0.10452	Late_change
677	gene:ENSG00000185803:t:145582843-145583181	SLC52A2	-6.71e-05	0.290559	Late_change	0.253501	0.071765	Early/transient	0.0120007	0.449765	Late_change
678	gene:ENSG00000185811:s:50367234-50367353	IKZF1	0.0218041	-0.218015	Late_change	-0.060557	-0.258969	Late_change	NA	NA	NA
679	gene:ENSG00000185811:t:50450238-50450405	IKZF1	-0.0127693	0.249586	Late_change	0.0811551	0.36955	Late_change	NA	NA	NA
680	gene:ENSG00000186020:s:37045572-37045698	ZNF529	0.000339072	-0.61595	Late_change	-0.557724	-0.0704923	Early/transient	-0.456934	-0.676523	Early/Sustained
681	gene:ENSG00000186020:t:37039003-37039224	ZNF529	-0.0929572	-0.621065	Late_change	-0.209441	0.0087961	Early/transient	-0.412217	-0.814774	Early/Sustained
682	gene:ENSG00000186104:t:14900660-14900989	CYP2R1	0.00831875	-0.221014	Late_change	0.0331269	-0.441632	Late_change	0.000212134	-0.688297	Late_change
683	gene:ENSG00000186166:s:118881931-118882232	CCDC84	0.0542825	0.20826	Late_change	0.0648334	0.335526	Late_change	0.0729006	0.230582	Late_change
684	gene:ENSG00000186166:t:118882649-118882713	CCDC84	-0.0579579	-0.225698	Late_change	-0.0628296	-0.33937	Late_change	-0.0815357	-0.245947	Late_change
685	gene:ENSG00000186566:t:42513846-42513913	GPATCH8	0.0147017	-0.249547	Late_change	NA	NA	NA	NA	NA	NA
686	gene:ENSG00000186635:s:72404370-72404528	ARAP1	0.0202638	0.233596	Late_change	0.0779694	0.21873	Late_change	0.00836038	0.305673	Late_change
687	gene:ENSG00000186635:t:72399500-72399582	ARAP1	0.10351	0.347124	Early/Sustained	0.0541161	0.195576	Late_change	-0.0036247	0.333133	Late_change
688	gene:ENSG00000186654:t:45098372-45098488	PRR5	-0.0547692	-0.37446	Late_change	-0.367503	-0.364397	Early/Sustained	-0.531894	-0.460958	Early/Sustained
689	gene:ENSG00000186854:t:85066273-85066616	TRABD2A	-0.0032026	0.223153	Late_change	0.0171837	0.201583	Late_change	0.00285418	0.0949336	Late_change
690	gene:ENSG00000187239:s:132687205-132687485	FNBP1	-0.135985	-0.0836495	Early/Sustained	-0.0619244	-0.311722	Late_change	-0.115917	-0.246336	Early/Sustained
691	gene:ENSG00000187239:t:132671169-132671287	FNBP1	0.133508	0.1692	Early/Sustained	0.139335	0.233506	Early/Sustained	0.0374495	0.202795	Late_change
692	gene:ENSG00000187764:s:92094439-92094805	SEMA4D	-0.0100493	-0.284141	Late_change	-0.0304149	-0.0629638	Late_change	-0.15392	-0.363741	Early/Sustained
693	gene:ENSG00000187764:s:92112834-92113045	SEMA4D	-0.0307687	-0.0250716	Late_change	-0.274133	-0.274793	Early/Sustained	-0.107779	-0.273341	Early/Sustained
694	gene:ENSG00000187764:t:92070803-92070868	SEMA4D	0.00519365	0.203831	Late_change	-0.00185377	0.314664	Late_change	0.00637297	0.303897	Late_change
695	gene:ENSG00000188002:s:1632960-1633021	RP11-43F13.1	0.0409864	0.366001	Late_change	-0.00301758	0.105202	Late_change	0.0595731	-0.415767	Late_change
696	gene:ENSG00000188171:t:20829085-20829211	ZNF626	0.055273	0.478322	Late_change	0.0487487	0.179646	Late_change	0.330029	0.261262	Early/Sustained
697	gene:ENSG00000188186:s:99746530-99746828	LAMTOR4	-0.0378354	-0.305098	Late_change	-0.118548	-0.223085	Early/Sustained	-0.0899314	-0.267883	Late_change
698	gene:ENSG00000188191:t:750966-751246	PRKAR1B	-0.0424873	-0.738991	Late_change	-0.3372	-0.588749	Early/Sustained	-0.416299	-0.65011	Early/Sustained
699	gene:ENSG00000188735:t:122199555-122199644	TMEM120B	0.0193003	0.608115	Late_change	NA	NA	NA	-0.237362	0.495111	Early/transient
700	gene:ENSG00000189007:s:143762530-143763114	ADAT2	-0.0771649	-0.313762	Late_change	-0.384664	-0.279433	Early/Sustained	NA	NA	NA
701	gene:ENSG00000189007:t:143759646-143759831	ADAT2	-0.0600085	-0.584686	Late_change	-0.0130461	-0.79096	Late_change	NA	NA	NA
702	gene:ENSG00000189046:s:109531052-109531277	ALKBH2	0.0049556	0.00346287	Late_change	-0.00277831	-0.303572	Late_change	-0.0176799	-0.236321	Late_change
703	gene:ENSG00000189046:t:109530312-109530742	ALKBH2	0.00183435	-0.151196	Late_change	0.142952	-0.282567	Early/transient	-0.000876503	-0.292423	Late_change
704	gene:ENSG00000196236:s:41253088-41253667	XPNPEP3	-0.289151	-0.0258321	Early/transient	0.0109346	-0.463736	Late_change	0.00102575	-0.290016	Late_change
705	gene:ENSG00000196236:s:41349559-41349637	XPNPEP3	0.0509519	-0.49724	Late_change	-0.0475358	-0.526017	Late_change	-0.000632779	-0.330397	Late_change
706	gene:ENSG00000196284:t:44900390-44900500	SUPT3H	0.00497662	0.69205	Late_change	-0.0353385	0.677532	Late_change	0.0230614	0.577136	Late_change
707	gene:ENSG00000196459:s:13752644-13752754	TRAPPC2	-0.0105578	0.499764	Late_change	-0.0734821	0.660698	Late_change	0.00857215	0.591737	Late_change
708	gene:ENSG00000196636:t:96810323-96811075	ACN9	0.011793	-0.208489	Late_change	0.0192341	-0.249786	Late_change	-0.0287951	-0.0118069	Late_change
709	gene:ENSG00000196705:t:21349138-21349264	ZNF431	-0.00443469	-0.0418417	Late_change	0.00915737	0.486197	Late_change	0.00863223	-0.389798	Late_change
710	gene:ENSG00000197077:t:25566787-25566905	KIAA1671	0.042762	0.383926	Late_change	NA	NA	NA	NA	NA	NA
711	gene:ENSG00000197136:t:65389677-65389837	PCNXL3	0.434934	-0.00100216	Early/transient	-0.0125602	0.422379	Late_change	0.0423336	0.344991	Late_change
712	gene:ENSG00000197136:t:65403645-65403782	PCNXL3	-0.0280225	-0.236615	Late_change	-0.229515	-0.0787854	Early/transient	-0.183915	-0.459601	Early/Sustained
713	gene:ENSG00000197142:t:114154676-114154860	ACSL5	0.201886	0.28368	Early/Sustained	0.125446	0.0558094	Early/transient	0.0643033	0.231699	Late_change
714	gene:ENSG00000197694:s:131371401-131371568	SPTAN1	-0.00634145	-0.39308	Late_change	-0.0883745	-0.439508	Late_change	-0.167289	-0.445811	Early/Sustained
715	gene:ENSG00000197694:t:131373993-131374124	SPTAN1	-0.00907921	-0.392765	Late_change	-0.131406	-0.403248	Early/Sustained	-0.126943	-0.488491	Early/Sustained
716	gene:ENSG00000198160:s:67391825-67391925	MIER1	0.00693601	0.430766	Late_change	NA	NA	NA	NA	NA	NA
717	gene:ENSG00000198270:t:112429548-112429693	TMEM116	0.00505499	-0.296957	Late_change	-0.0290511	-0.37032	Late_change	NA	NA	NA
718	gene:ENSG00000198276:t:62572303-62572396	UCKL1	0.0161778	0.260131	Late_change	0.130623	0.044118	Early/transient	-0.0190355	0.308514	Late_change
719	gene:ENSG00000198408:s:103556803-103557911	MGEA5	0.143412	0.17829	Early/Sustained	0.238664	0.448712	Early/Sustained	-0.0286953	0.432457	Late_change
720	gene:ENSG00000198408:t:103552596-103552700	MGEA5	-0.142026	-0.21106	Early/Sustained	-0.243665	-0.389376	Early/Sustained	-0.190866	-0.424681	Early/Sustained
721	gene:ENSG00000198520:s:45190407-45190511	C1orf228	-0.00379725	0.320826	Late_change	0.103277	0.287866	Early/Sustained	0.0866965	0.337293	Late_change
722	gene:ENSG00000198520:t:45190407-45190511	C1orf228	-0.116424	-0.238046	Early/Sustained	-0.115399	-0.267048	Early/Sustained	-0.0413285	-0.209336	Late_change
723	gene:ENSG00000198520:t:45190548-45190889	C1orf228	-0.0041081	0.314438	Late_change	0.0800831	0.292856	Late_change	0.0727221	0.332762	Late_change
724	gene:ENSG00000203485:s:105180540-105181193	INF2	-0.0840889	-0.226615	Late_change	0.0143862	-0.328462	Late_change	-0.0542297	-0.491752	Late_change
725	gene:ENSG00000203485:t:105185132-105185942	INF2	-0.110419	-0.17128	Early/Sustained	-0.0158313	-0.357528	Late_change	-0.0237013	-0.430833	Late_change
726	gene:ENSG00000204351:s:31937057-31937197	SKIV2L	0.0125008	-0.311586	Late_change	0.0266606	-0.275961	Late_change	0.0518183	-0.346353	Late_change
727	gene:ENSG00000204351:t:31937269-31937532	SKIV2L	0.0548746	-0.261383	Late_change	0.0333122	-0.382101	Late_change	0.0335915	-0.298577	Late_change
728	gene:ENSG00000204427:t:31668719-31668805	ABHD16A	-0.0321853	0.235364	Late_change	NA	NA	NA	-0.0348978	0.253346	Late_change
729	gene:ENSG00000204444:t:31624128-31624410	APOM	-0.148253	0.424498	Early/transient	0.0120694	0.366726	Late_change	-0.00942597	0.00494212	Late_change
730	gene:ENSG00000204463:s:31612296-31612428	BAG6	0.0278161	0.172413	Late_change	0.101495	0.412073	Early/Sustained	0.218704	0.294717	Early/Sustained
731	gene:ENSG00000204463:t:31611859-31612004	BAG6	0.0391286	-0.177183	Late_change	-0.0987027	-0.391011	Late_change	-0.165289	-0.370365	Early/Sustained
732	gene:ENSG00000204482:t:31555593-31555791	LST1	-0.0208091	0.365878	Late_change	0.100211	0.527232	Early/Sustained	0.20043	0.0599054	Early/transient
733	gene:ENSG00000204564:t:30617335-30617736	C6orf136	-0.0156396	-0.374221	Late_change	0.00787198	-0.116207	Late_change	-0.0411819	-0.296675	Late_change
734	gene:ENSG00000204576:s:30524663-30525297	PRR3	0.195296	0.436982	Early/Sustained	0.0805196	0.28618	Late_change	0.0248898	0.305908	Late_change
735	gene:ENSG00000204576:s:30525927-30525989	PRR3	-0.0287232	0.159624	Late_change	0.194059	0.537887	Early/Sustained	0.089197	0.352286	Late_change
736	gene:ENSG00000204576:t:30529611-30529901	PRR3	0.243565	0.666362	Early/Sustained	0.166771	0.403983	Early/Sustained	0.0384665	0.395792	Late_change
737	gene:ENSG00000204790:s:69245941-69245978	CBWD6	-0.00307211	-0.240941	Late_change	NA	NA	NA	-0.0107564	-0.020685	Late_change
738	gene:ENSG00000204790:t:69240013-69240059	CBWD6	0.0033217	0.19579	Late_change	0.00508674	0.248317	Late_change	0.00644218	0.00898971	Late_change
739	gene:ENSG00000205531:s:3010359-3010501	NAP1L4	0.0523732	0.388509	Late_change	NA	NA	NA	0.279749	0.449807	Early/Sustained
740	gene:ENSG00000205560:s:51012764-51012848	CPT1B	-0.00707543	-0.290531	Late_change	0.0459969	-0.404283	Late_change	0.0162055	-0.430808	Late_change
741	gene:ENSG00000205560:t:51011949-51012167	CPT1B	0.110388	-0.377488	Early/transient	0.00696974	-0.123657	Late_change	0.00332204	-0.551815	Late_change
742	gene:ENSG00000205572:t:69322234-69322342	SERF1B	-0.0428974	0.300005	Late_change	0.00398736	0.160054	Late_change	0.143497	0.255872	Early/Sustained
743	gene:ENSG00000205664:s:3746547-3747433	RP11-706O15.1	-0.216513	0.0122762	Early/transient	-0.00782711	-0.326365	Late_change	-0.0861404	-0.37559	Late_change
744	gene:ENSG00000205758:t:34966813-34967921	CRYZL1	0.319036	-0.223987	Early/transient	-0.111869	-0.625245	Early/Sustained	-0.033699	-0.538655	Late_change
745	gene:ENSG00000206190:t:26026166-26026370	ATP10A	-0.0515982	0.269113	Late_change	0.0405076	0.475595	Late_change	0.320237	0.392181	Early/Sustained
746	gene:ENSG00000206562:s:15457279-15457449	METTL6	-0.357343	-0.310366	Early/Sustained	-0.464207	-0.438073	Early/Sustained	-0.0239818	-0.183568	Late_change
747	gene:ENSG00000213015:t:56153805-56154835	ZNF580	-0.0773771	0.318801	Late_change	NA	NA	NA	-0.140307	0.547814	Early/transient
748	gene:ENSG00000213380:t:69360816-69363082	COG8	-0.00892635	-0.309555	Late_change	-0.0987119	-0.267975	Late_change	-0.445715	0.00200805	Early/transient
749	gene:ENSG00000213593:s:57505080-57505169	TMX2	0.0172642	0.214717	Late_change	0.122699	0.254263	Early/Sustained	NA	NA	NA
750	gene:ENSG00000213593:t:57505805-57505902	TMX2	0.0256199	0.244175	Late_change	0.175434	0.291104	Early/Sustained	0.163164	0.262152	Early/Sustained
751	gene:ENSG00000213780:t:30879791-30879963	GTF2H4	-0.0643462	-0.238469	Late_change	-0.137006	-0.301016	Early/Sustained	-0.075533	-0.177428	Late_change
752	gene:ENSG00000213918:s:3707721-3707868	DNASE1	-0.0104444	0.359756	Late_change	-0.00304107	-0.00589384	Late_change	-0.0324452	0.419356	Late_change
753	gene:ENSG00000213965:t:33200091-33200298	NUDT19	0.0945713	0.29432	Late_change	-0.0455231	0.524058	Late_change	NA	NA	NA
754	gene:ENSG00000214021:s:9870624-9871079	TTLL3	-0.0019174	-0.0894933	Late_change	0.334906	-0.37879	Early/transient	-0.0241921	-0.283028	Late_change
755	gene:ENSG00000214135:t:197348373-197348739	AC024560.3	-0.0825418	-0.432826	Late_change	-0.0143355	-0.103276	Late_change	-0.205766	-0.309499	Early/Sustained
756	gene:ENSG00000214160:s:183966533-183966759	ALG3	0.048028	0.331338	Late_change	0.165048	0.178972	Early/Sustained	0.184505	0.31923	Early/Sustained
757	gene:ENSG00000214160:t:183963501-183963600	ALG3	-0.0454214	-0.295786	Late_change	-0.0826855	-0.175173	Late_change	-0.116315	-0.3402	Early/Sustained
758	gene:ENSG00000215041:s:7227714-7227799	NEURL4	0.0146208	0.0037083	Late_change	-0.0147373	0.535794	Late_change	0.0238155	0.26836	Late_change
759	gene:ENSG00000215788:s:6524435-6524513	TNFRSF25	0.202837	0.249739	Early/Sustained	0.0863822	0.173545	Late_change	0.239892	0.244128	Early/Sustained
760	gene:ENSG00000215788:t:6522923-6523040	TNFRSF25	-0.178142	-0.19043	Early/Sustained	-0.113829	-0.165016	Early/Sustained	-0.260615	-0.279944	Early/Sustained
761	gene:ENSG00000217930:t:4393208-4393292	PAM16	-0.142877	-0.238159	Early/Sustained	-0.194034	-0.414745	Early/Sustained	-0.367363	-0.332637	Early/Sustained
762	gene:ENSG00000219481:s:16901652-16901724	NBPF1	0.00935141	-0.624788	Late_change	NA	NA	NA	-0.522943	-0.83965	Early/Sustained
763	gene:ENSG00000219481:t:16899637-16899688	NBPF1	0.0113559	-0.536459	Late_change	-0.551828	-0.675966	Early/Sustained	NA	NA	NA
764	gene:ENSG00000221978:s:1328776-1328876	CCNL2	-0.0395286	-0.340501	Late_change	-0.0316364	-0.508458	Late_change	-0.0440157	-0.440177	Late_change
765	gene:ENSG00000221978:t:1326146-1326245	CCNL2	0.0145627	0.226803	Late_change	-0.0275914	0.306247	Late_change	-0.0166998	0.418961	Late_change
766	gene:ENSG00000222011:s:102389475-102390109	FAM185A	-0.0087468	0.567333	Late_change	0.0566963	0.0166867	Late_change	NA	NA	NA
767	gene:ENSG00000223705:s:75039651-75039743	NSUN5P1	-0.01164	-0.401435	Late_change	0.00520673	-0.177272	Late_change	-0.262938	-0.268859	Early/Sustained
768	gene:ENSG00000223705:t:75044163-75044305	NSUN5P1	-0.0216304	-0.439586	Late_change	NA	NA	NA	-0.129086	-0.43517	Early/Sustained
769	gene:ENSG00000225648:s:72300004-72300555	SBDSP1	0.00123388	0.516735	Late_change	0.292856	0.487728	Early/Sustained	0.00866382	0.578049	Late_change
770	gene:ENSG00000225648:t:72302182-72302378	SBDSP1	0.0213787	0.555146	Late_change	0.167962	0.585721	Early/Sustained	0.0112833	0.548394	Late_change
771	gene:ENSG00000227232:s:24738-24897	WASH7P	0.0164263	-0.284075	Late_change	-0.0138745	-0.304121	Late_change	0.0194142	-0.377736	Late_change
772	gene:ENSG00000227232:t:18266-18379	WASH7P	0.00936523	-0.338305	Late_change	-0.0174159	-0.407593	Late_change	-0.0144402	-0.411532	Late_change
773	gene:ENSG00000229056:t:197125055-197125096	AC020571.3	-0.261121	-0.521696	Early/Sustained	-0.114627	-0.215876	Early/Sustained	-0.483468	-0.590522	Early/Sustained
774	gene:ENSG00000229809:s:30583443-30584055	ZNF688	-0.313017	-0.494263	Early/Sustained	NA	NA	NA	NA	NA	NA
775	gene:ENSG00000231721:t:130630369-130630594	LINC-PINT	0.154659	0.702098	Early/Sustained	0.342786	0.670287	Early/Sustained	0.431246	0.711645	Early/Sustained
776	gene:ENSG00000234171:s:3606082-3606588	RNASEH1-AS1	-0.0401111	-0.0952509	Late_change	-0.100358	-0.378279	Early/Sustained	-0.0328155	-0.288763	Late_change
777	gene:ENSG00000234545:s:92207464-92207520	FAM133B	0.0356715	0.292639	Late_change	0.109985	0.0611261	Early/Sustained	0.175617	0.234151	Early/Sustained
778	gene:ENSG00000234614:t:151816521-151816718	AL450992.2	0.0188884	0.634349	Late_change	0.66295	0.641407	Early/Sustained	NA	NA	NA
779	gene:ENSG00000236624:s:45961883-45962295	CCDC163P	-0.00638785	-0.28428	Late_change	0.010416	-0.0529789	Late_change	0.0701435	-0.483493	Late_change
780	gene:ENSG00000236943:s:144520348-144521002	RP11-640M9.1	0.0533565	0.0570182	Late_change	0.0680468	0.336663	Late_change	0.255813	0.353032	Early/Sustained
781	gene:ENSG00000240344:t:201752336-201752408	PPIL3	0.0340876	-0.26778	Late_change	-0.260626	-0.114564	Early/transient	-0.0043945	-0.295726	Late_change
782	gene:ENSG00000243406:s:52760818-52760958	MRPS31P5	0.00757011	-0.481722	Late_change	-0.037258	-0.449117	Late_change	-0.0265901	-0.0202199	Late_change
783	gene:ENSG00000243406:t:52754502-52754789	MRPS31P5	0.0110022	-0.453529	Late_change	0.0176271	-0.608775	Late_change	-0.253567	-0.346541	Early/Sustained
784	gene:ENSG00000243716:s:22524843-22524936	NPIPB5	0.00293467	-0.304443	Late_change	-0.0991575	-0.0745889	Late_change	-0.0827308	-0.384725	Late_change
785	gene:ENSG00000247092:t:95998634-95999398	SNHG10	-0.00578315	-0.456324	Late_change	-0.0015911	-0.356359	Late_change	0.0257121	-0.271926	Late_change
786	gene:ENSG00000247828:s:87566323-87567042	TMEM161B-AS1	-0.0112935	-0.313822	Late_change	-0.0218501	-0.263661	Late_change	-0.00837983	-0.371567	Late_change
787	gene:ENSG00000248049:s:68566998-68567202	UBA6-AS1	-0.0711337	-0.216234	Late_change	-0.093251	-0.0977356	Late_change	-0.0207409	-0.395276	Late_change
788	gene:ENSG00000248672:s:160761100-160761221	LY75-CD302	0.237836	-0.32035	Early/transient	-0.266494	-0.507781	Early/Sustained	-0.0306306	-0.21636	Late_change
789	gene:ENSG00000248919:t:99027211-99027429	ATP5J2-PTCD1	0.0166488	0.0967047	Late_change	0.339959	0.33793	Early/Sustained	0.034759	0.415019	Late_change
790	gene:ENSG00000250251:s:15229137-15229286	PKD1P6	0.0690616	0.630362	Late_change	0.140244	0.00616555	Early/transient	0.00070392	0.532587	Late_change
791	gene:ENSG00000250251:t:15228059-15228202	PKD1P6	-0.0543288	-0.650042	Late_change	-0.101291	-0.2248	Early/Sustained	NA	NA	NA
792	gene:ENSG00000253882:s:143533733-143533801	RP11-61L23.2	-0.00121536	-0.157847	Late_change	-0.00587009	-0.450673	Late_change	0.00566147	-0.393641	Late_change
793	gene:ENSG00000253882:t:143343325-143344739	RP11-61L23.2	0.0183647	0.623471	Late_change	NA	NA	NA	NA	NA	NA
794	gene:ENSG00000255561:s:111749682-111749904	FDXACB1	-0.0185833	0.332971	Late_change	-0.218354	0.280023	Early/transient	0.00602331	0.233909	Late_change
795	gene:ENSG00000256500:s:104151323-104151373	RP11-73M18.2	-0.0210518	0.340127	Late_change	-0.0221417	0.0192719	Late_change	0.0359074	0.38541	Late_change
796	gene:ENSG00000263072:t:3182020-3182104	RP11-473M20.14	0.0239412	-0.65848	Late_change	-0.220423	-0.703368	Early/Sustained	NA	NA	NA
797	gene:ENSG00000265148:t:56414697-56415040	BZRAP1-AS1	0.0574341	-0.151435	Late_change	0.0316714	-0.467325	Late_change	0.0821965	-0.412262	Late_change
798	gene:ENSG00000265681:s:47018501-47018814	RPL17	0.0330394	0.241536	Late_change	0.18897	0.303081	Early/Sustained	0.209963	0.373447	Early/Sustained
799	gene:ENSG00000265681:t:47017887-47017954	RPL17	0.0116826	0.273802	Late_change	NA	NA	NA	0.137293	0.286054	Early/Sustained
800	gene:ENSG00000266173:s:61781365-61781407	STRADA	0.00477086	0.434162	Late_change	0.000210017	0.319139	Late_change	-0.00342268	0.351815	Late_change
801	gene:ENSG00000266173:t:61780192-61781298	STRADA	0.010639	-0.315204	Late_change	0.0207592	-0.257653	Late_change	-0.00142587	-0.324238	Late_change
802	gene:ENSG00000267106:s:9732181-9732321	C19orf82	0.661039	0.37435	Early/Sustained	-0.0210431	0.103982	Late_change	NA	NA	NA
803	transcript:ENST00000330546:t:18381-18496	XXyac-YRM2039.2-202	0.0469095	0.34072	Late_change	0.278303	0.33165	Early/Sustained	-0.021579	0.068581	Late_change
804	transcript:ENST00000399972:t:18381-18496	XXyac-YRM2039.2-203	0.0333738	0.350604	Late_change	0.272595	0.331174	Early/Sustained	-0.0191399	0.067509	Late_change
805	transcript:ENST00000423562:s:24738-24897	WASH7P-201	0.0241196	-0.292278	Late_change	-0.0138673	-0.302255	Late_change	0.0166867	-0.385696	Late_change
806	transcript:ENST00000423562:t:18266-18379	WASH7P-201	0.00818963	-0.342524	Late_change	-0.0127651	-0.407151	Late_change	-0.00778888	-0.415921	Late_change
807	transcript:ENST00000438504:s:24738-24897	WASH7P-202	0.0234444	-0.29299	Late_change	-0.0172762	-0.289224	Late_change	0.0108696	-0.382551	Late_change
808	transcript:ENST00000438504:t:18266-18379	WASH7P-202	0.0085717	-0.333738	Late_change	-0.014291	-0.400998	Late_change	-0.00722358	-0.409207	Late_change
809	transcript:ENST00000442898:t:18381-18496	XXyac-YRM2039.2-201	0.0343244	0.355559	Late_change	0.28568	0.331429	Early/Sustained	-0.0165211	0.0651272	Late_change
810	transcript:ENST00000442926:t:18381-18496	XXyac-YRM2039.2-001	0.0397848	0.348279	Late_change	0.289135	0.33948	Early/Sustained	-0.021668	0.0668326	Late_change
811	transcript:ENST00000488147:s:24738-24897	WASH7P-001	0.0152956	-0.298974	Late_change	-0.00976656	-0.305387	Late_change	0.0114968	-0.36082	Late_change
812	transcript:ENST00000488147:t:18266-18379	WASH7P-001	0.0084682	-0.350454	Late_change	-0.015106	-0.410038	Late_change	-0.00834718	-0.410036	Late_change
813	transcript:ENST00000538476:s:24738-24897	WASH7P-203	0.0179739	-0.279741	Late_change	-0.0112163	-0.303281	Late_change	0.0174053	-0.364832	Late_change
814	transcript:ENST00000538476:t:18266-18379	WASH7P-203	0.00966004	-0.336474	Late_change	-0.0139272	-0.422613	Late_change	-0.0111217	-0.425782	Late_change
815	transcript:ENST00000541675:s:24738-24868	WASH7P-204	0.0227202	-0.274678	Late_change	-0.010449	-0.286117	Late_change	0.00992121	-0.366411	Late_change
816	transcript:ENST00000541675:t:18266-18379	WASH7P-204	0.00733648	-0.33068	Late_change	-0.0150274	-0.418119	Late_change	-0.012681	-0.416623	Late_change
