# Supplementary material for: Alternative splicing of apoptosis genes promotes human T cell survival
Source: eLife. 2022 Oct 20;11:e80953. doi: 10.7554/eLife.80953 (PMC9625086; doi:10.7554/eLife.80953)
Supplement: Supplementary file 4. [file elife-80953-supp4.xlsx]

## Sheet: Early Sustained Events
Motif Enrichment Analysis (STREME) of Events Regulated Early Sustained Events
Target sequences Early sustained events (n = 63). Control sequences are Late Changing events) (n = 212).
	CONSENSUS	Target #	Target %	Control #	Control %	PVALUE	EVALUE
Downstream Intron	ATCAAATGRY	6	10	4	1.89	0.00921	0.0645
	ATGTGAGAA	13	21.67	26	12.26	0.0558	0.391
	GCTGTGVAGGH	42	70	144	67.92	0.445	3.12
	GTGAAAGAAG	36	60	141	66.51	0.861	6.03
Exon	AAGGACCAG	11	17.46	2	0.93	1.98e-06	5.95e-06
	ACACTGA	26	41.27	30	13.89	6.64e-06	1.99e-05
	AGTTAAC	28	44.44	47	21.76	0.000462	0.00139
Upstream Intron	GGGACAAGGA	14	22.22	3	1.42	1.23e-07	6.14e-07
	AARGGGSAAAY	41	65.08	97	45.75	0.0052	0.026
	AAATTGGTC	22	34.92	41	19.34	0.00933	0.0467
	ATTGTYATTTTYTW	28	44.44	62	29.25	0.0188	0.0939

## Sheet: 8hr CD28 costimulation
Motif Enrichment Analysis (STREME) of Events Regulated by CD28 costimulation at 8hrs
Target sequences are >2 (CD3CD28/CD3) ratio (n = 46). Control sequences are .5-1.5 (CD3CD28/CD3) ratio (n = 44).
	CONSENSUS	Target #	Target %	Control #	Control %	PVALUE	EVALUE
Downstream Intron	GGCAGGAGAAW	20	43.48	0	0	1.1e-07	1.32e-06
	GTAAAAAT	26	56.52	3	6.82	4.73e-07	5.68e-06
	GKTTCAAKYB	30	65.22	6	13.64	2.19e-06	2.63e-05
	AGGTTAGG	18	39.13	1	2.27	1.79e-05	0.000214
	ATTAGCAGG	16	34.78	1	2.27	9.71e-05	0.00117
Exon	CAWGGCCTSC	16	34.04	0	0	5.27e-05	0.000263
	VGGCCCAGGCV	11	23.4	0	0	0.00115	0.00575
	AAACCAG	14	29.79	1	2.27	0.00264	0.0132
	CCAAAGYAC	19	40.43	3	6.82	0.00594	0.0297
	AGAGAC	8	17.02	0	0	0.00717	0.0359
Upstream Intron	AAATACTTR	30	65.22	4	9.09	1e-07	6e-07
	AAATTCAGGA	16	34.78	0	0	4.62e-06	2.77e-05
	TGTCAAT	21	45.65	2	4.55	1.32e-05	7.91e-05
	AAAAAGAATC	14	30.43	0	0	2.65e-05	0.000159
	GATGCAA	22	47.83	3	6.82	2.91e-05	0.000175

## Sheet: 48hr CD28 Costimulation
Motif Enrichment Analysis (STREME) of Events Regulated by CD28 costimulation at 48hrs
Target sequences are >2 (CD3CD28/CD3) ratio (n = 47). Control sequences are .9-1.1 (CD3CD28/CD3) ratio (n = 46).
	CONSENSUS	Target #	Target %	Control #	Control %	PVALUE	EVALUE
Downstream Intron	CCCCTGCC	32	65.31	5	10	3.38e-08	3.04e-07
	GCCTGGA	18	36.73	1	2	1.11e-05	0.0001
	CCCACCMYCMYRCCY	20	40.82	3	6	6.32e-05	0.000568
	MKGAACC	30	61.22	10	20	0.00022	0.00198
Exon	ACAWCAGMTWCWS	29	61.7	10	21.74	0.0469	0.141
	CMCAGAGCAGHGA	18	38.3	10	21.74	0.405	1.22
	AGGCAGAAA	32	68.09	21	45.65	0.527	1.58
Upstream Intron	CAGCYTCCMT	31	67.39	8	17.78	1.49e-06	7.43e-06
	CTCMKGAG	24	52.17	6	13.33	7.33e-05	0.000367
	CTTCTCCA	19	41.3	3	6.67	9.22e-05	0.000461
